# Supplementary material
Source: PubMed Central journal article supplement (PMC6832863)

Supporting Information (SI-3)

## **Organic Contaminants in Human Breast Milk Identified by Non-Targeted Analysis**

Cuong D. Tran<sup>1</sup>, Nathan G. Dodder<sup>2</sup>, Penelope J.E. Quintana<sup>1</sup>, Kayo Watanabe<sup>1</sup>, Jae H. Kim<sup>3</sup>, Melbourne F. Hovell<sup>1</sup>, Christina D. Chambers<sup>3,4</sup>, Eunha Hoh<sup>\*1</sup>

1. Graduate School of Public Health, San Diego State University, 5500 Campanile Drive, San Diego, CA 92182
2. San Diego State University Research Foundation, 5250 Campanile Drive, San Diego, CA 92182
3. Department of Pediatrics, School of Medicine, University of California San Diego, La Jolla, CA 92093
4. Department of Family Medicine and Public Health, School of Medicine, University of California San Diego, La Jolla, CA 92093

### **Experimental Mass Spectra**

Shown are the deconvoluted experimental GC×GC/TOF-MS electron impact mass spectra (Peak True) and the matching NIST MS Search library spectrum (Library Hit) for all compounds identified across the three human breast milk samples. The spectra are organized by breast milk sample, then solid phase extraction fractions 1) hexane:dichloromethane, 2) dichloromethane, and 3) water. Compound names in parentheses correspond to those used in Table 1, if different from the name used by the NIST library. Structures are from the NIST library match. Unknown mass spectra are labeled, and are shown with the closest (incorrect) NIST MS Library match.

Sample 1, Fraction 1 (Hexane/DCM)

Naphthalene,

1,2,3,4-tetrahydro-5-methyl-

CAS # = 2809-64-5

1st Dimension R.T. = 806.382

2nd Dimension R.T. = 0.924

Quant Mass(es) = 146

S/N = 323.62

Area = 19136

Height = 3441.8

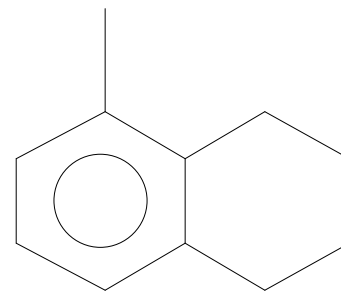

(5-Methyltetralin)

Peak True - sample "Lipid BM 1 F1:1", peak 355, at 806.382 , 0.924 sec , sec (Spec # 31410)

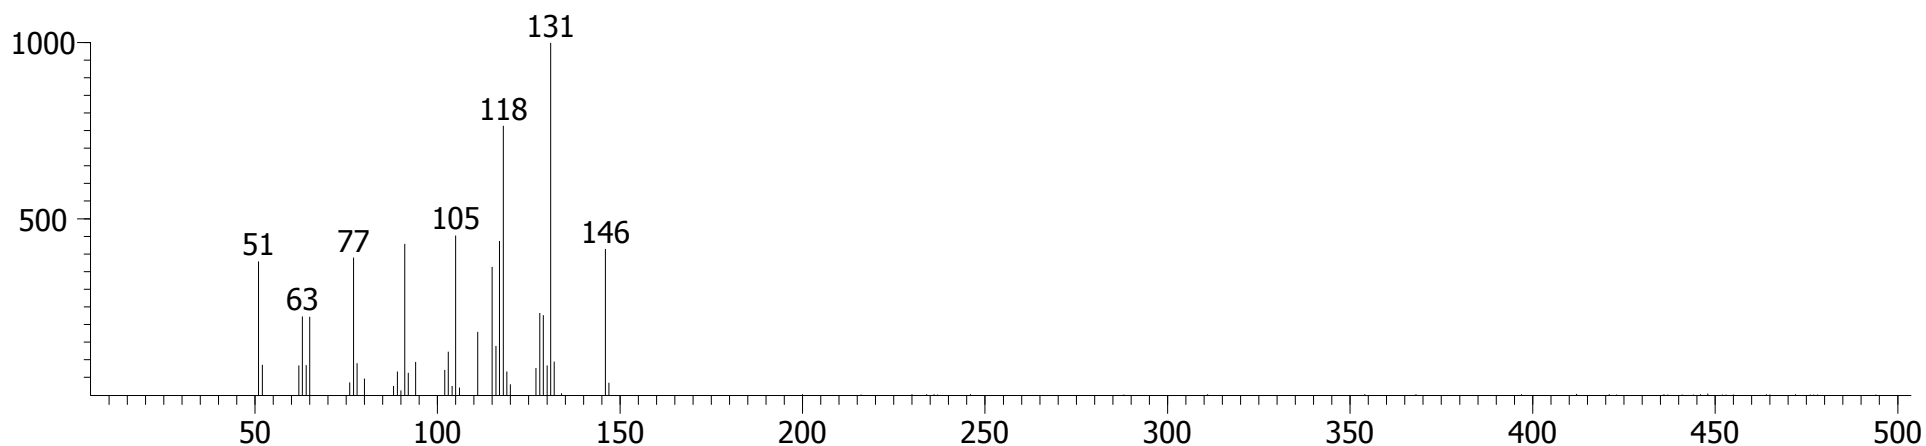

Library Hit - similarity 855, "Naphthalene, 1,2,3,4-tetrahydro-5-methyl-"

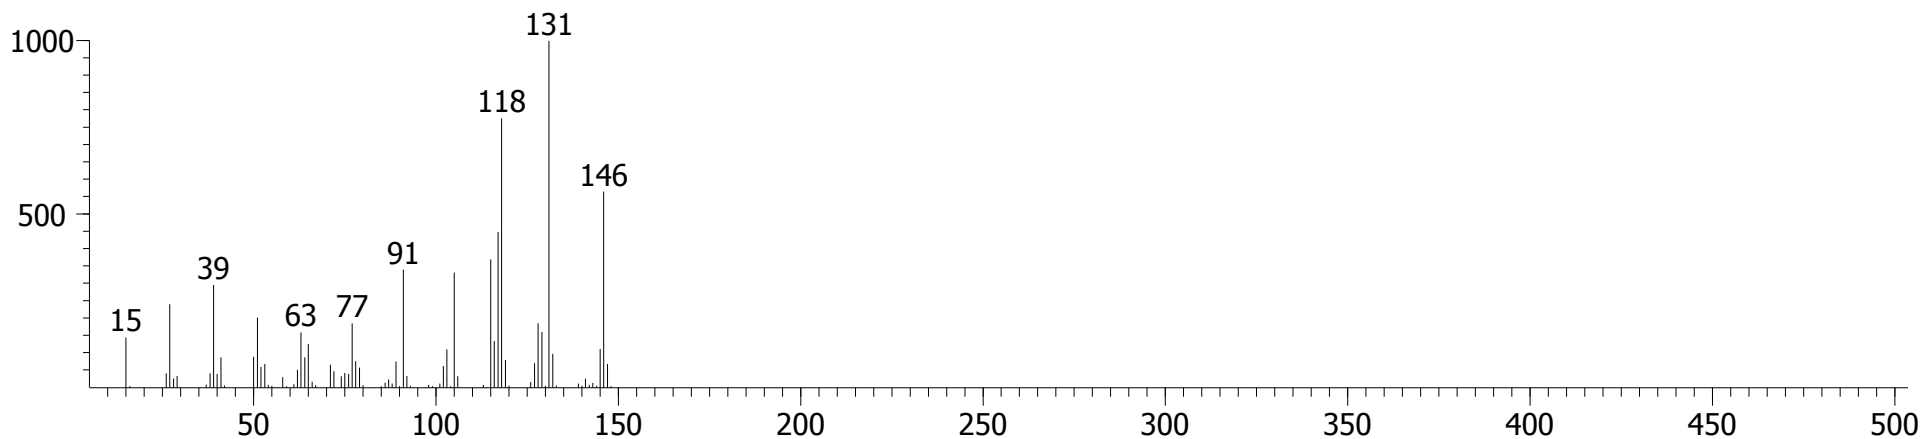

# Sample 1, Fraction 1 (Hexane/DCM)

## 5H-1-Pyridine

CAS # = 270-91-7  
1st Dimension R.T. = 827.37  
2nd Dimension R.T. = 1.069  
Quant Mass(es) = 117  
S/N = 272.04  
Area = 19402  
Height = 2967.9

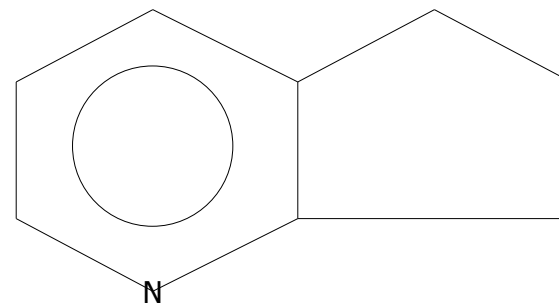

Peak True - sample "Lipid BM 1 F1:1", peak 394, at 827.37 , 1.069 sec , sec (Spec # 34612)

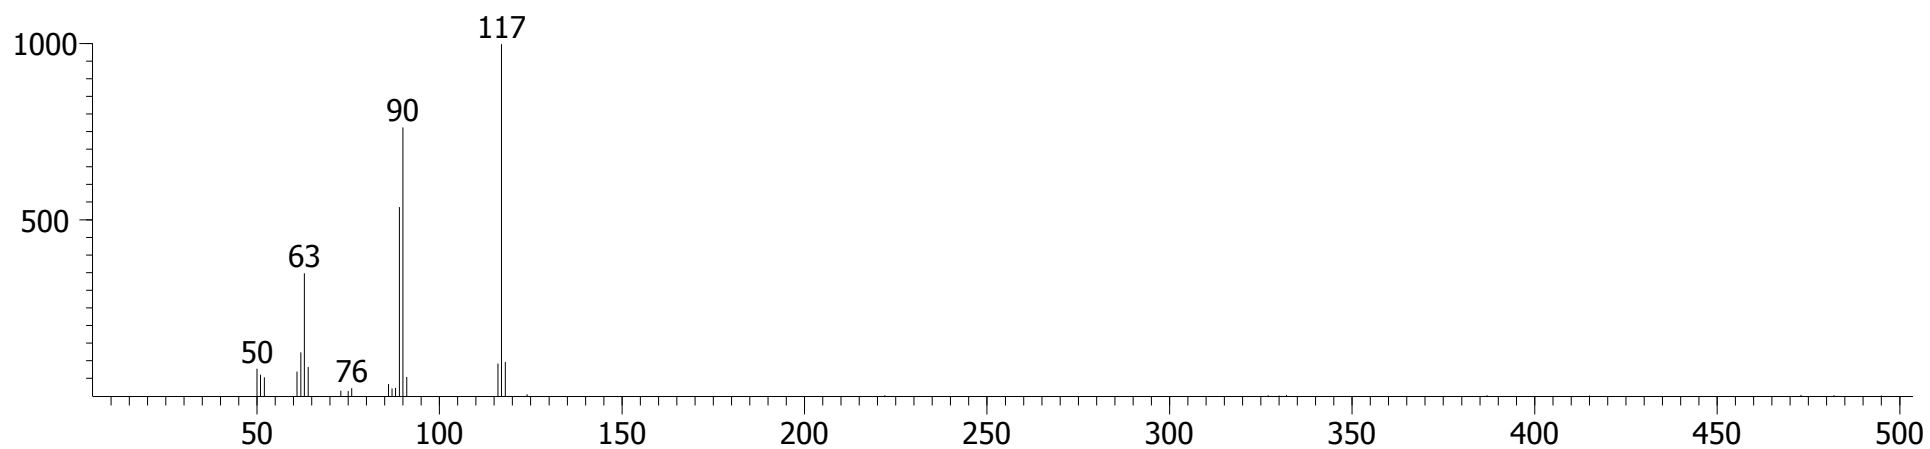

Library Hit - similarity 934, "5H-1-Pyridine"

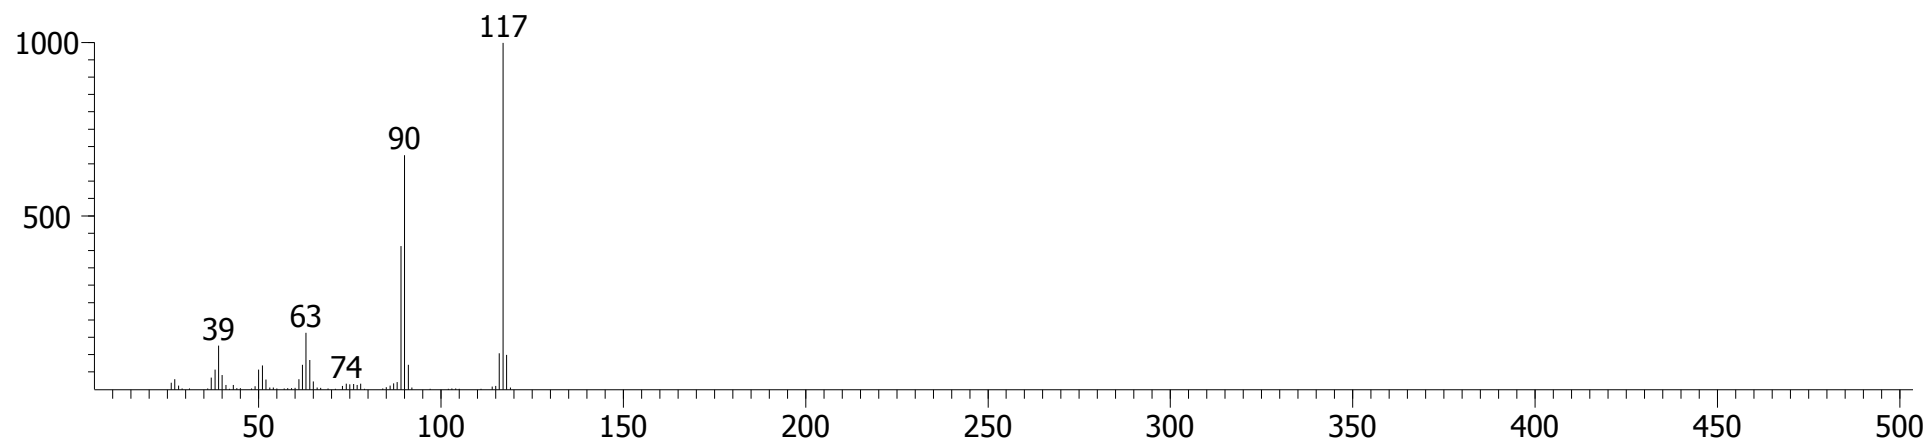

Sample 1, Fraction 1 (Hexane/DCM)

Naphthalene,

1,2,3,4-tetrahydro-1,4-dimethyl-

CAS # = 4175-54-6

1st Dimension R.T. = 834.366

2nd Dimension R.T. = 0.911

Quant Mass(es) = 160

S/N = 248.54

Area = 4259.3

Height = 583.63

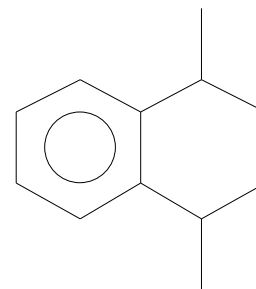

Peak True - sample "Lipid BM 1 F1:1", peak 404, at 834.366 , 0.911 sec , sec (Spec # 35648)

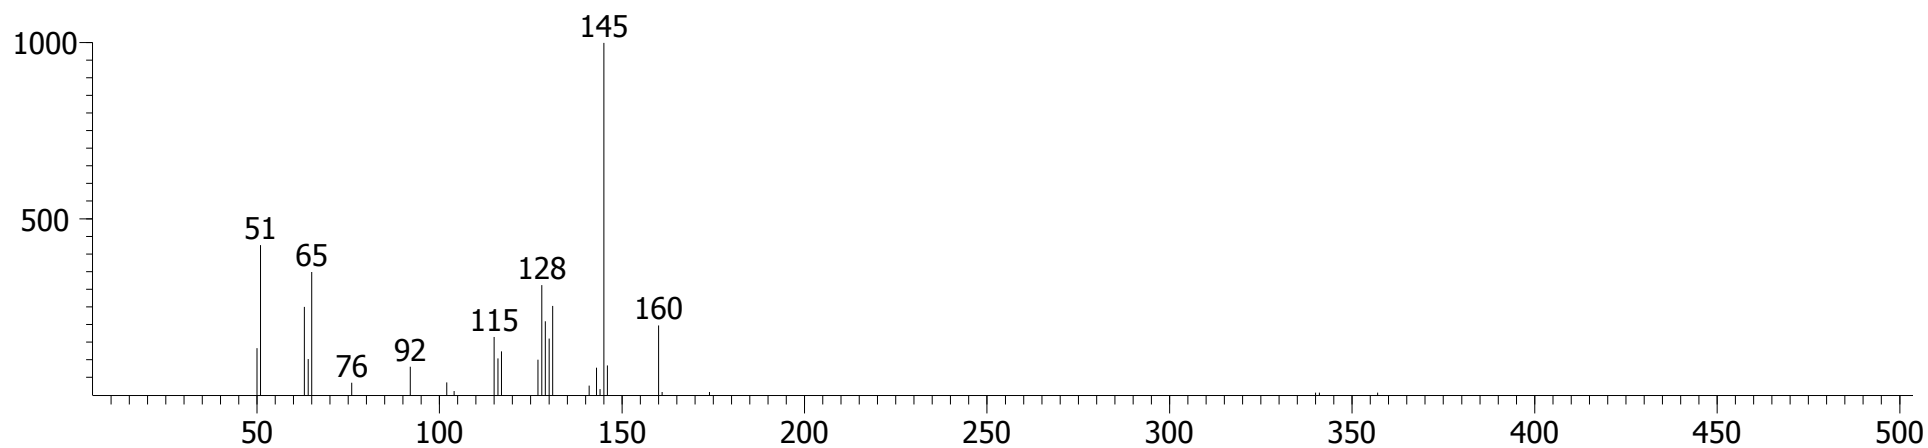

Library Hit - similarity 781, "Naphthalene, 1,2,3,4-tetrahydro-1,4-dimethyl-"

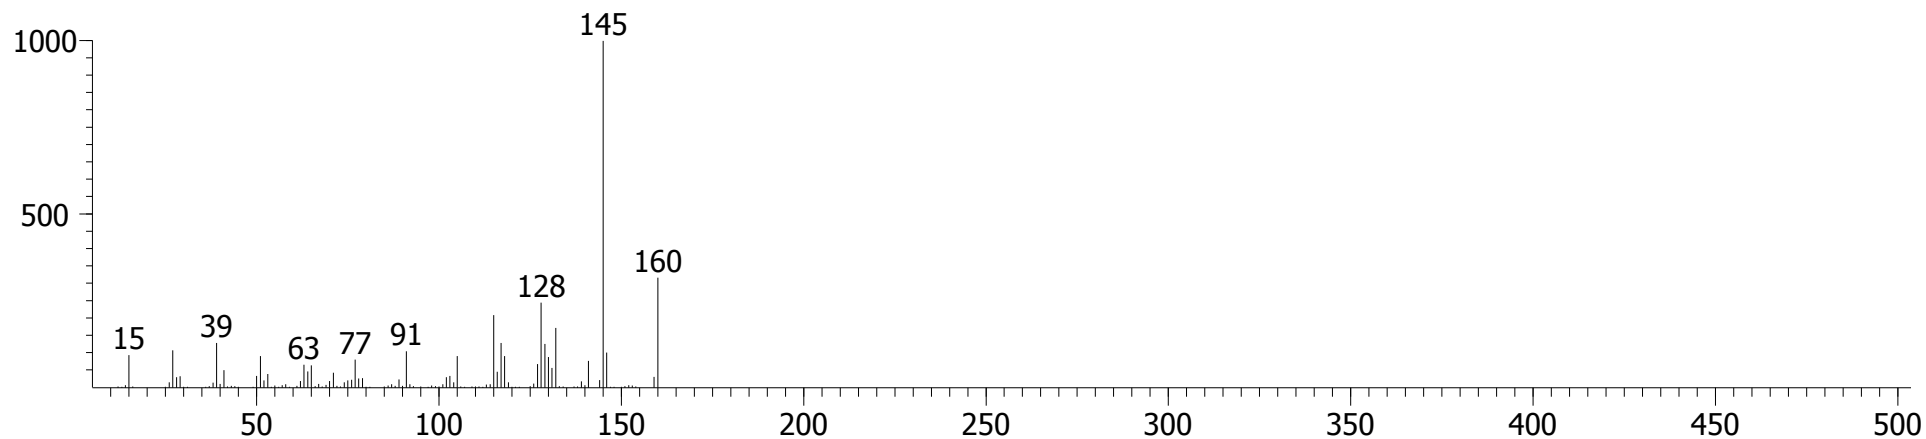

Sample 1, Fraction 1 (Hexane/DCM)

Benzene, (1,3-dimethyl-2-butenyl)-

CAS # = 50704-01-3  
1st Dimension R.T. = 851.856  
2nd Dimension R.T. = 0.924  
Quant Mass(es) = 160  
S/N = 478.29  
Area = 14828  
Height = 2424.3

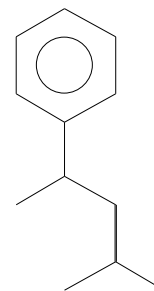

Peak True - sample "Lipid BM 1 F1:1", peak 437, at 851.856 , 0.924 sec , sec (Spec # 38300)

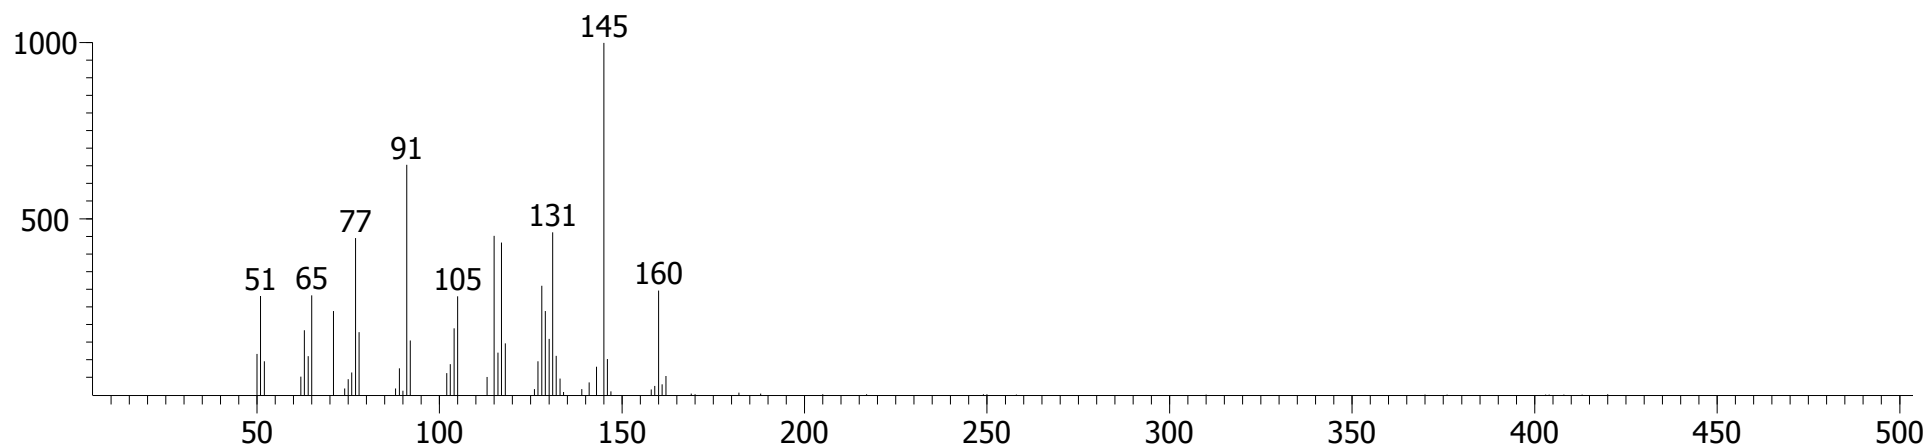

Library Hit - similarity 805, "Benzene, (1,3-dimethyl-2-butenyl)-"

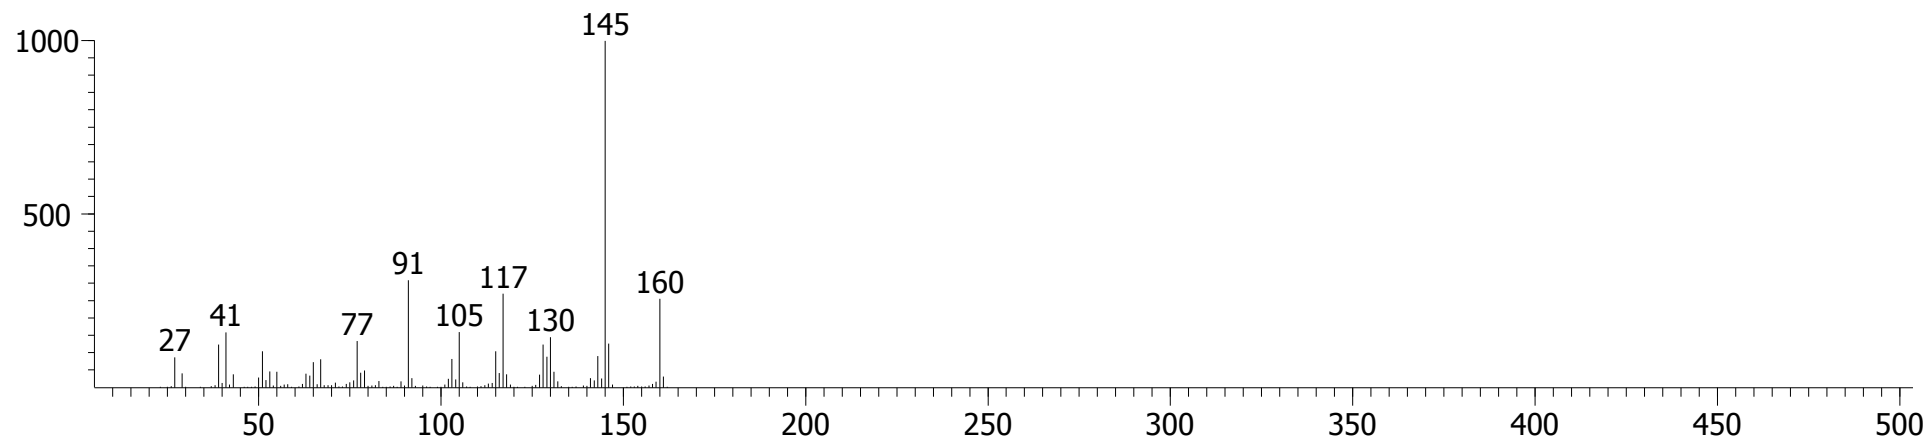

Sample 1, Fraction 1 (Hexane/DCM)

Naphthalene,

1,2,3,4-tetrahydro-1,1,6-trimethyl-

CAS # = 475-03-6

1st Dimension R.T. = 876.342

2nd Dimension R.T. = 0.917

Quant Mass(es) = 174

S/N = 1322.6

Area = 14170

Height = 2382.7

(1,1,6-Trimethyltetralin)

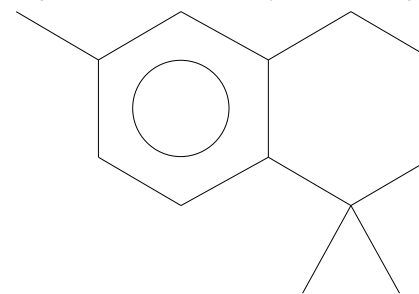

Peak True - sample "Lipid BM 1 F1:1", peak 478, at 876.342 , 0.917 sec , sec (Spec # 42009)

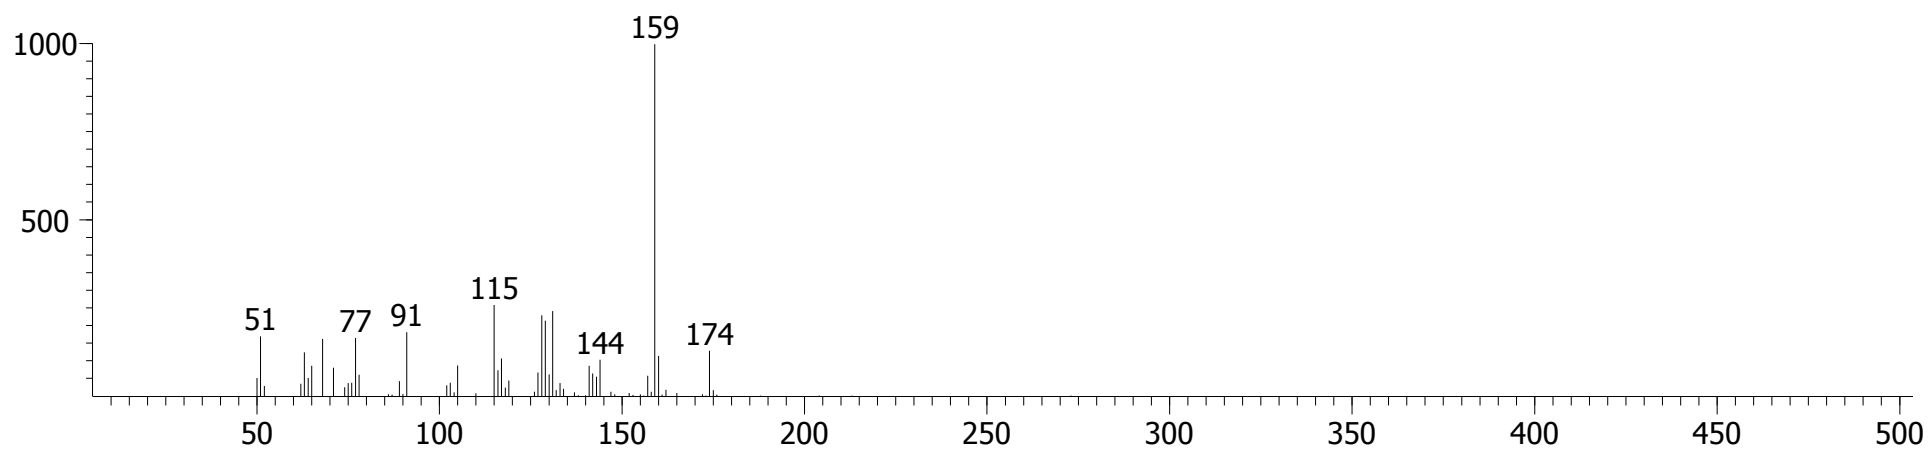

Library Hit - similarity 916, "Naphthalene, 1,2,3,4-tetrahydro-1,1,6-trimethyl-"

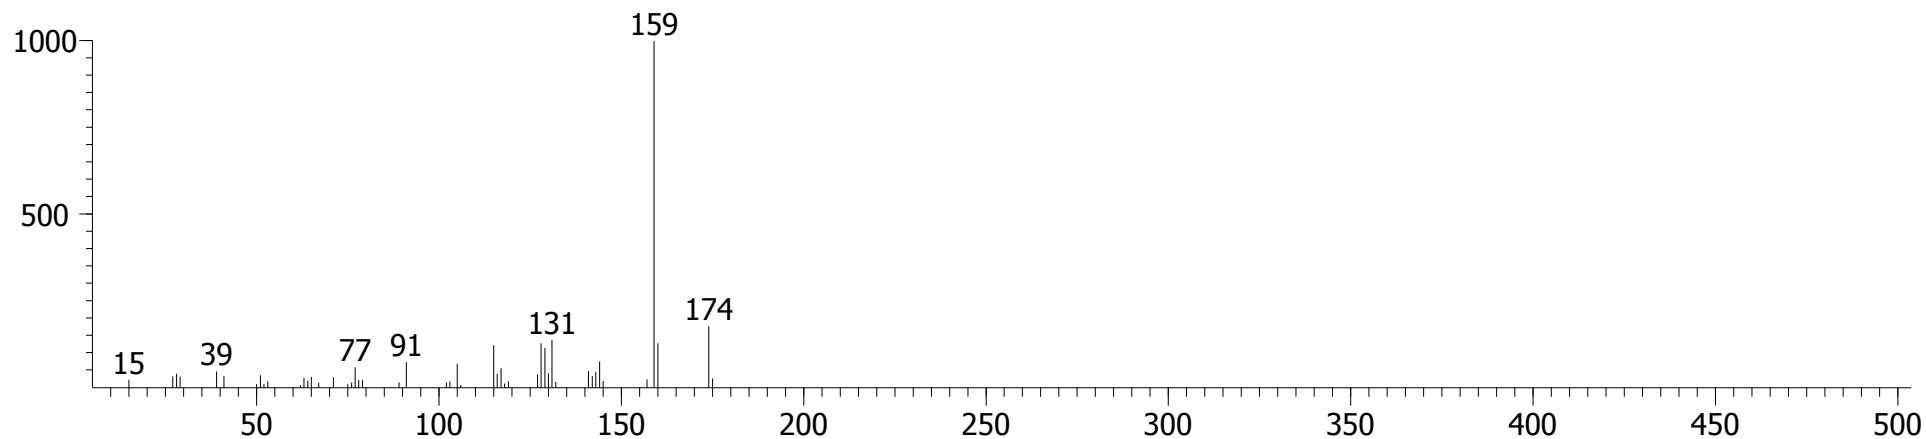

Sample 1, Fraction 1 (Hexane/DCM)

Naphthalene,

1,2,3,4-tetrahydro-1,4-dimethyl-

CAS # = 4175-54-6

1st Dimension R.T. = 907.824

2nd Dimension R.T. = 0.937

Quant Mass(es) = 160

S/N = 699.66

Area = 16587

Height = 2778.4



Peak True - sample "Lipid BM 1 F1:1", peak 534, at 907.824 , 0.937 sec , sec (Spec # 46782)

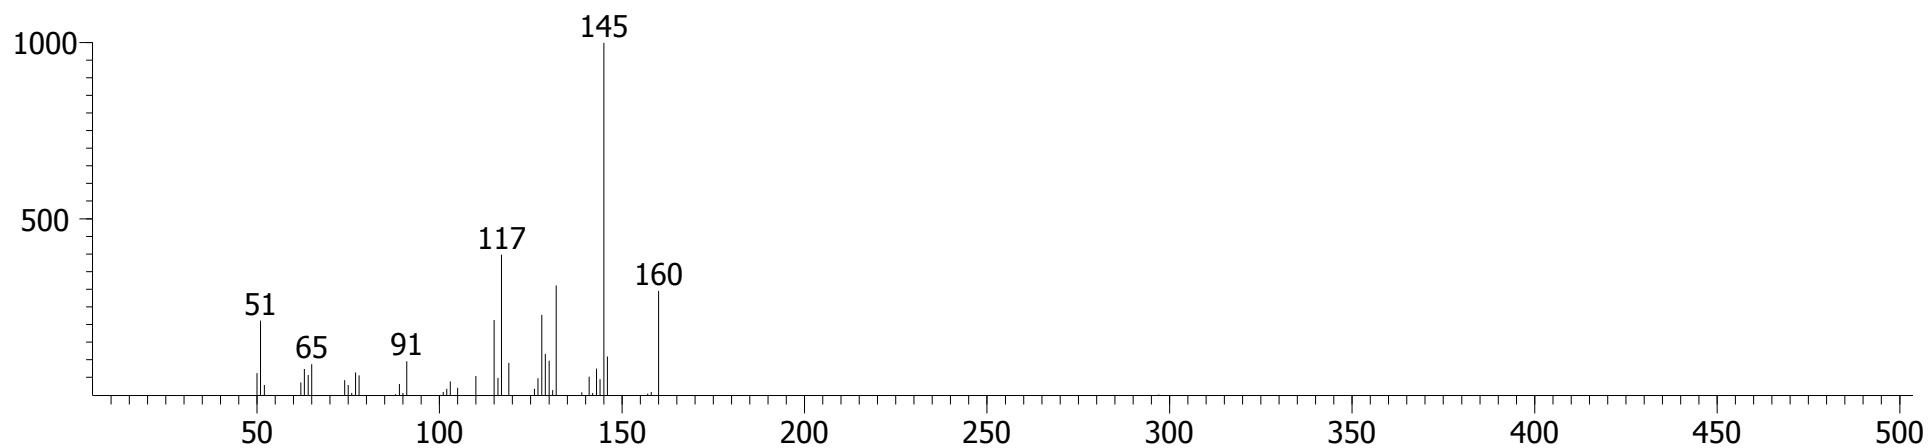

Library Hit - similarity 784, "Naphthalene, 1,2,3,4-tetrahydro-1,4-dimethyl-"

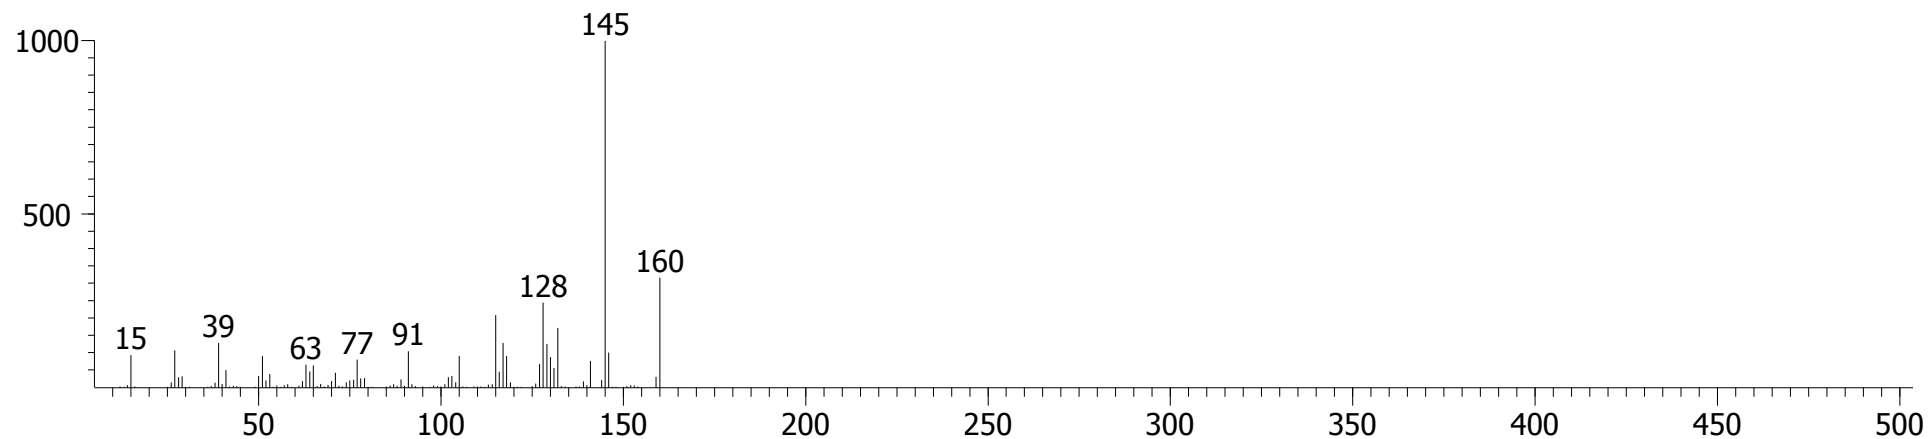

Sample 1, Fraction 1 (Hexane/DCM)

Diphenyl ether

CAS # = 101-84-8  
1st Dimension R.T. = 911.322  
2nd Dimension R.T. = 0.990  
Quant Mass(es) = 170  
S/N = 812.80  
Area = 33436  
Height = 6022.1

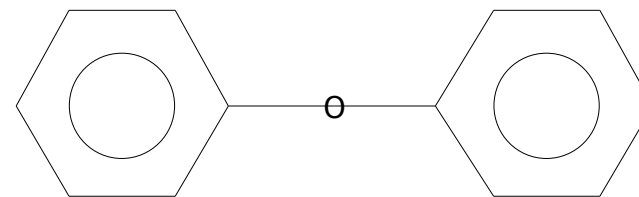

Peak True - sample "Lipid BM 1 F1:1", peak 539, at 911.322 , 0.990 sec , sec (Spec # 47320)

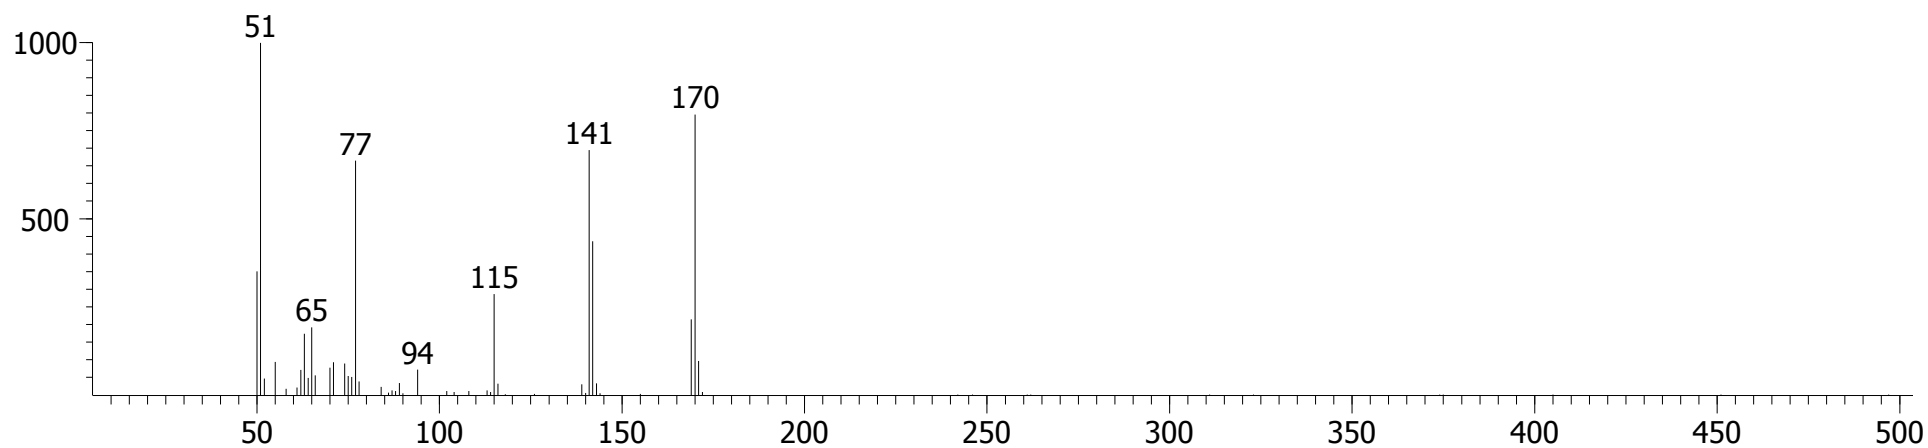

Library Hit - similarity 912, "Diphenyl ether"

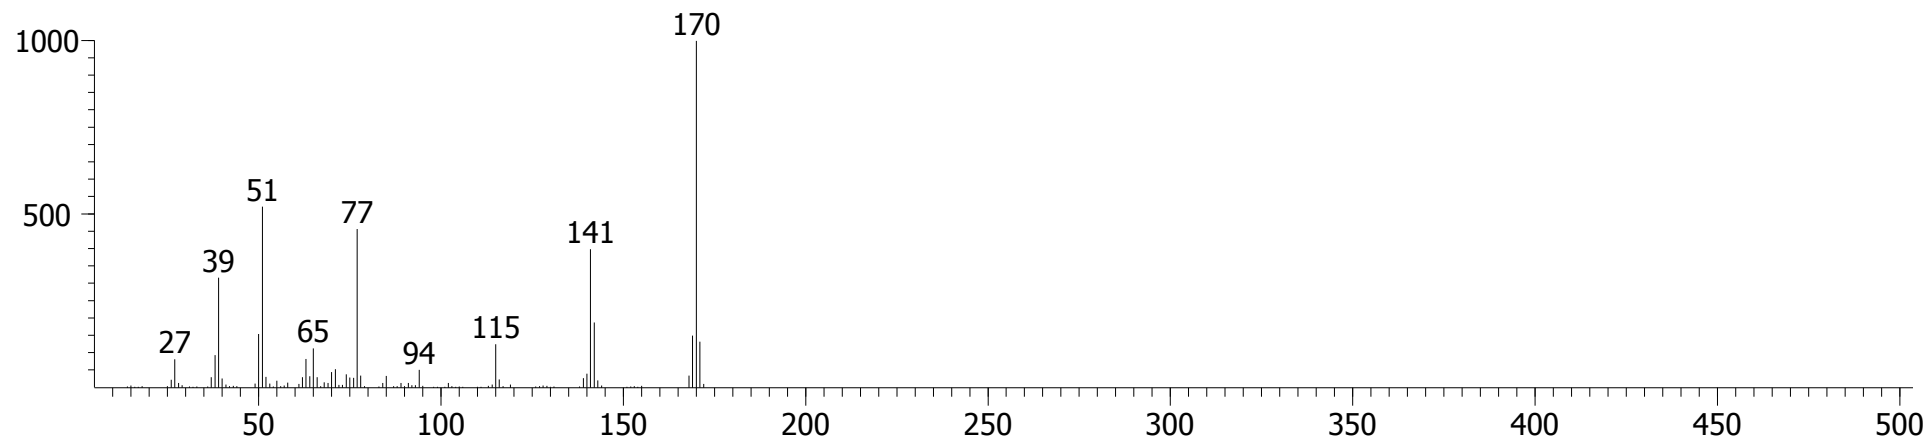



Sample 1, Fraction 1 (Hexane/DCM)

Benzoic acid, 2-(isopropyl)oxy-, methyl ester

CAS # = 0-00-0  
1st Dimension R.T. = 911.322  
2nd Dimension R.T. = 1.016  
Quant Mass(es) = 152  
S/N = 64.915  
Area = 2028.2  
Height = 263.14

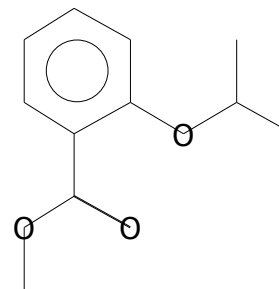

Peak True - sample "Lipid BM 1 F1:1", peak 540, at 911.322 , 1.016 sec , sec (Spec # 47324)

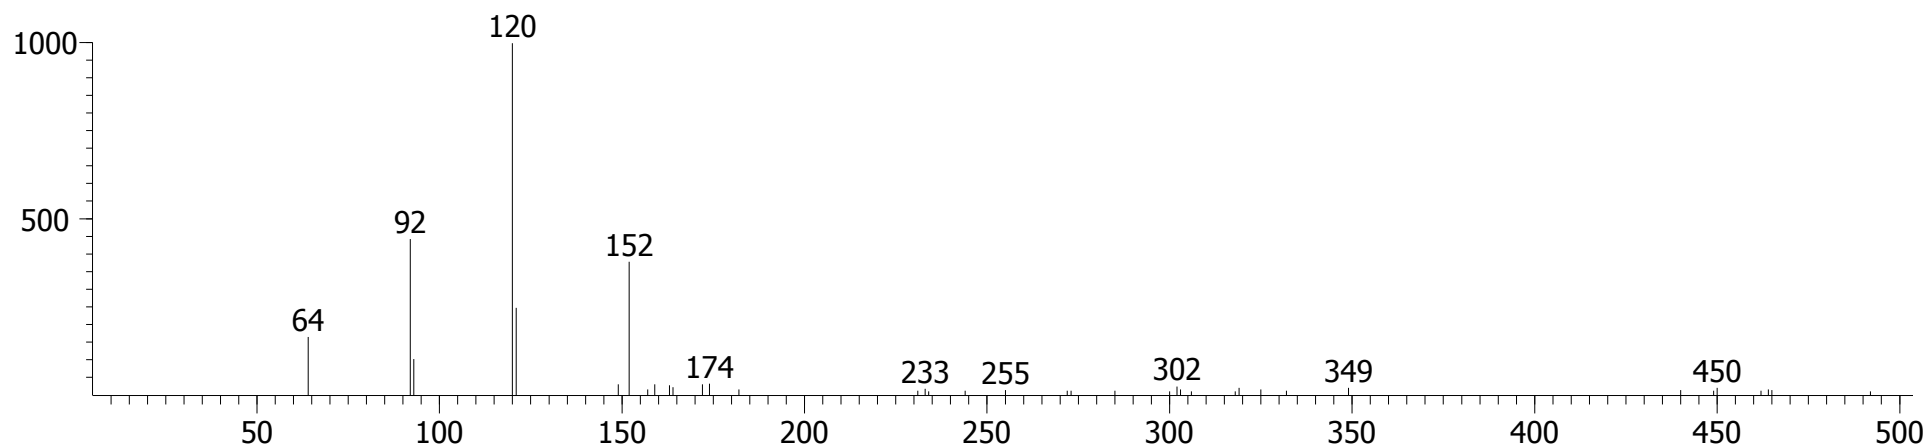

Library Hit - similarity 926, "Benzoic acid, 2-(isopropyl)oxy-, methyl ester"

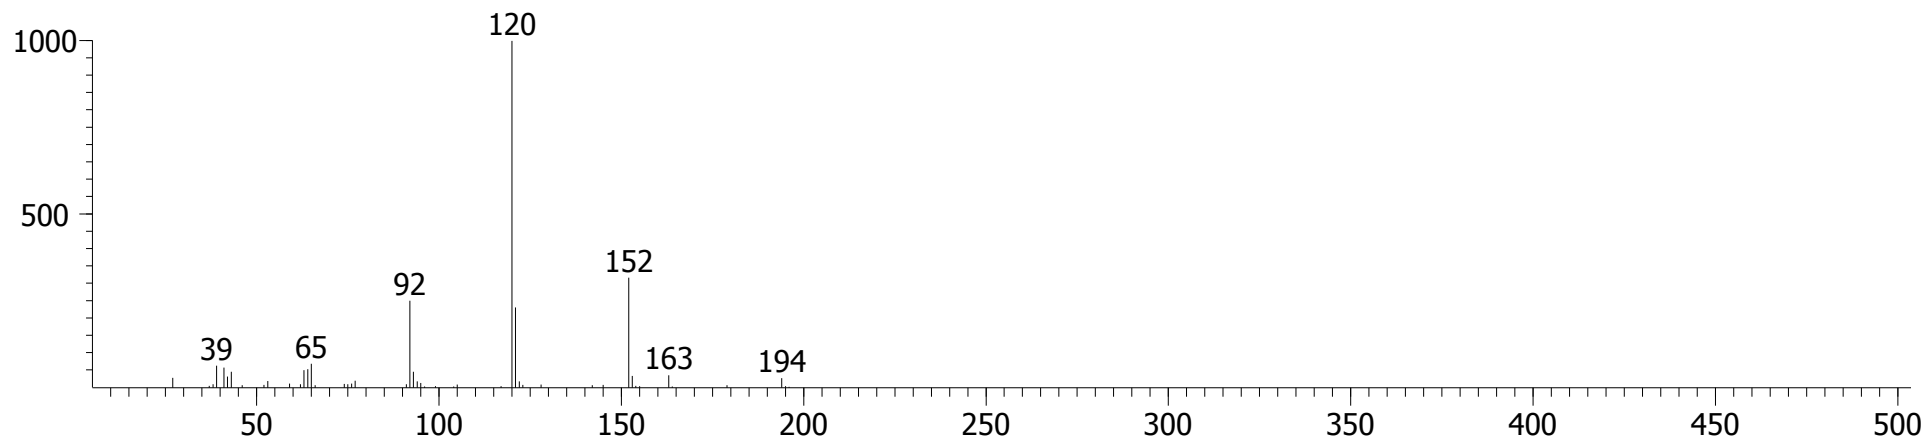

Sample 1, Fraction 1 (Hexane/DCM)

3-Ethyl-3-phenyl-1-pentene

CAS # = 19781-34-1  
1st Dimension R.T. = 918.318  
2nd Dimension R.T. = 0.917  
Quant Mass(es) = 174  
S/N = 265.55  
Area = 6287.0  
Height = 1131.5

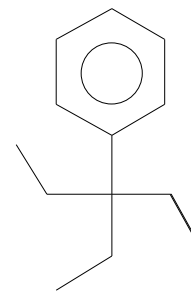

Peak True - sample "Lipid BM 1 F1:1", peak 546, at 918.318 , 0.917 sec , sec (Spec # 48369)

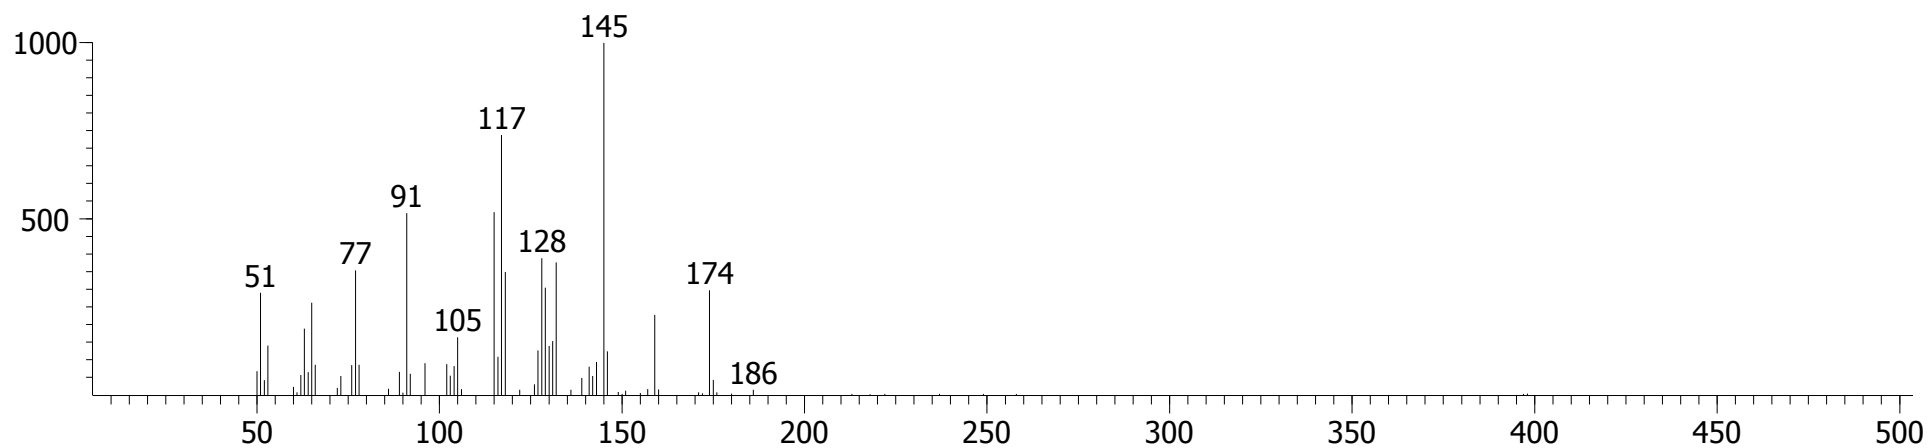

Library Hit - similarity 798, "3-Ethyl-3-phenyl-1-pentene"

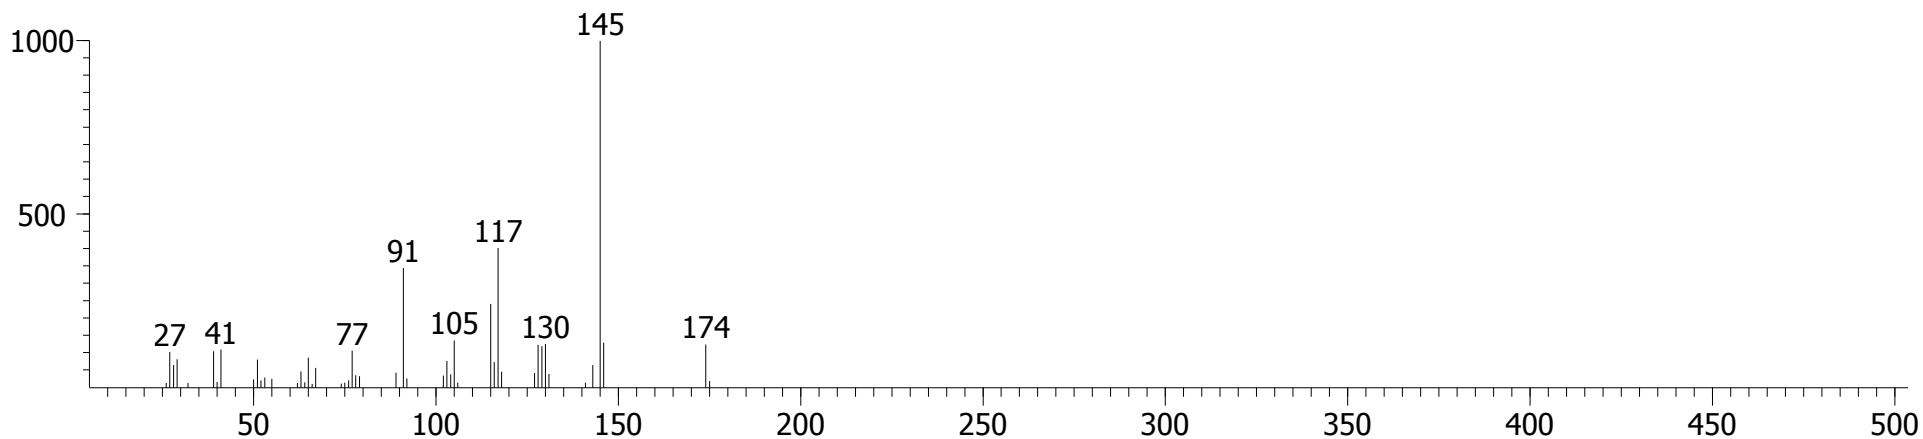

Sample 1, Fraction 1 (Hexane/DCM)

Naphthalene, 1,7-dimethyl-

CAS # = 575-37-1  
1st Dimension R.T. = 918.318  
2nd Dimension R.T. = 0.970  
Quant Mass(es) = 156  
S/N = 567.55  
Area = 28908  
Height = 4741.6

1,7-Dimethylnaphthalene

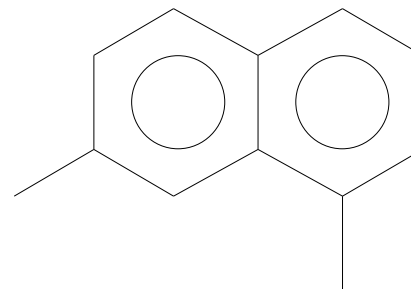

Peak True - sample "Lipid BM 1 F1:1", peak 547, at 918.318 , 0.970 sec , sec (Spec # 48377)

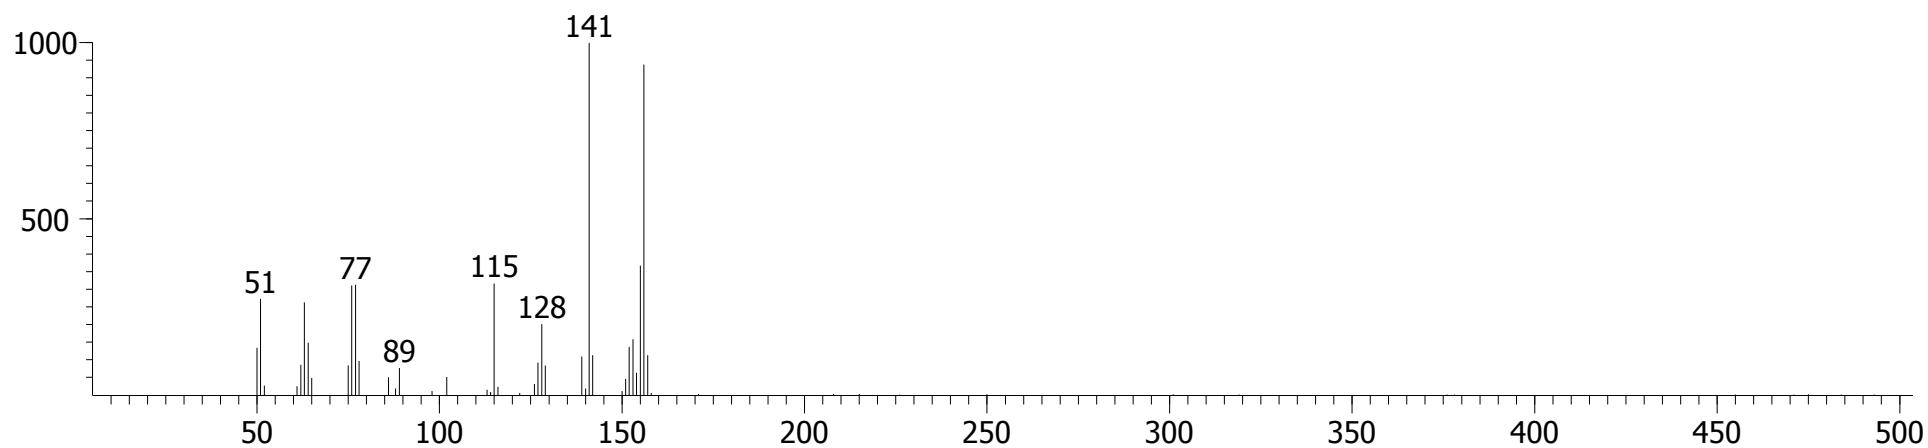

Library Hit - similarity 953, "Naphthalene, 1,7-dimethyl-"

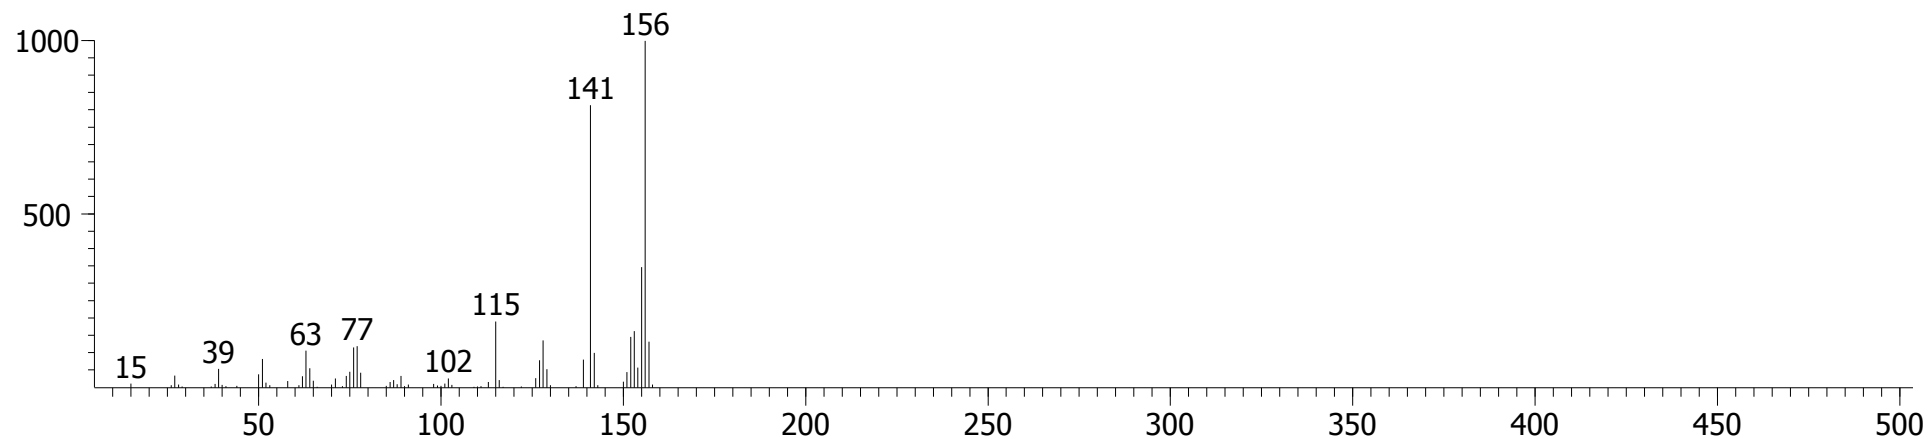

Sample 1, Fraction 1 (Hexane/DCM)

Naphthalene, 1,7-dimethyl-

CAS # = 575-37-1  
1st Dimension R.T. = 932.31  
2nd Dimension R.T. = 0.983  
Quant Mass(es) = 156  
S/N = 766.17  
Area = 54669  
Height = 9104.9

1,7-Dimethylnaphthalene

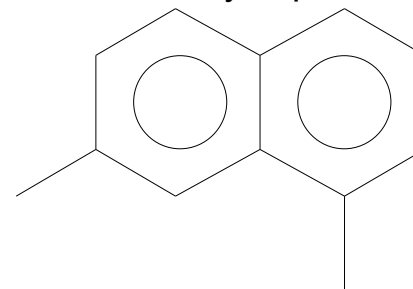

Peak True - sample "Lipid BM 1 F1:1", peak 570, at 932.31 , 0.983 sec , sec (Spec # 50499)

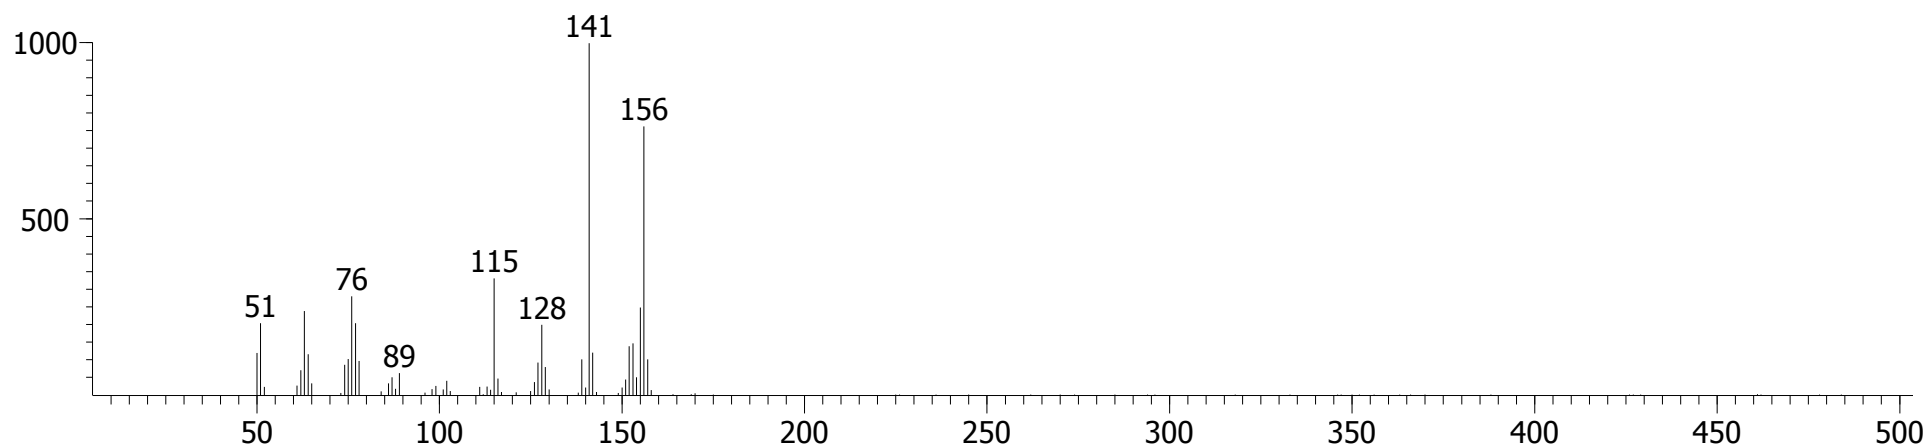

Library Hit - similarity 951, "Naphthalene, 1,7-dimethyl-"



Sample 1, Fraction 1 (Hexane/DCM)

Ethanone, 1,1'-(1,3-phenylene)bis-

(1,3-Diacetylbenzene)

CAS # = 6781-42-6  
1st Dimension R.T. = 932.31  
2nd Dimension R.T. = 1.043  
Quant Mass(es) = 162  
S/N = 274.53  
Area = 5278.5  
Height = 713.46

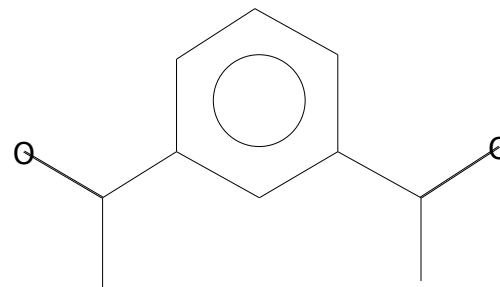

Peak True - sample "Lipid BM 1 F1:1", peak 571, at 932.31 , 1.043 sec , sec (Spec # 50508)

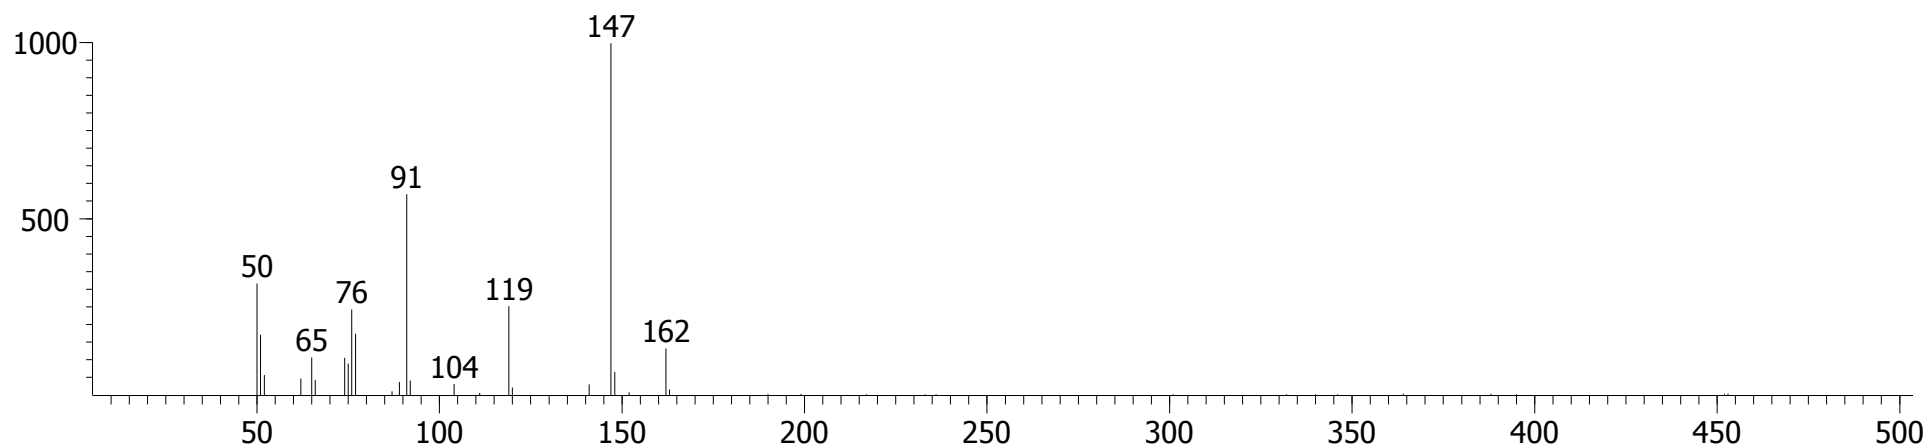

Library Hit - similarity 939, "Ethanone, 1,1'-(1,3-phenylene)bis-"

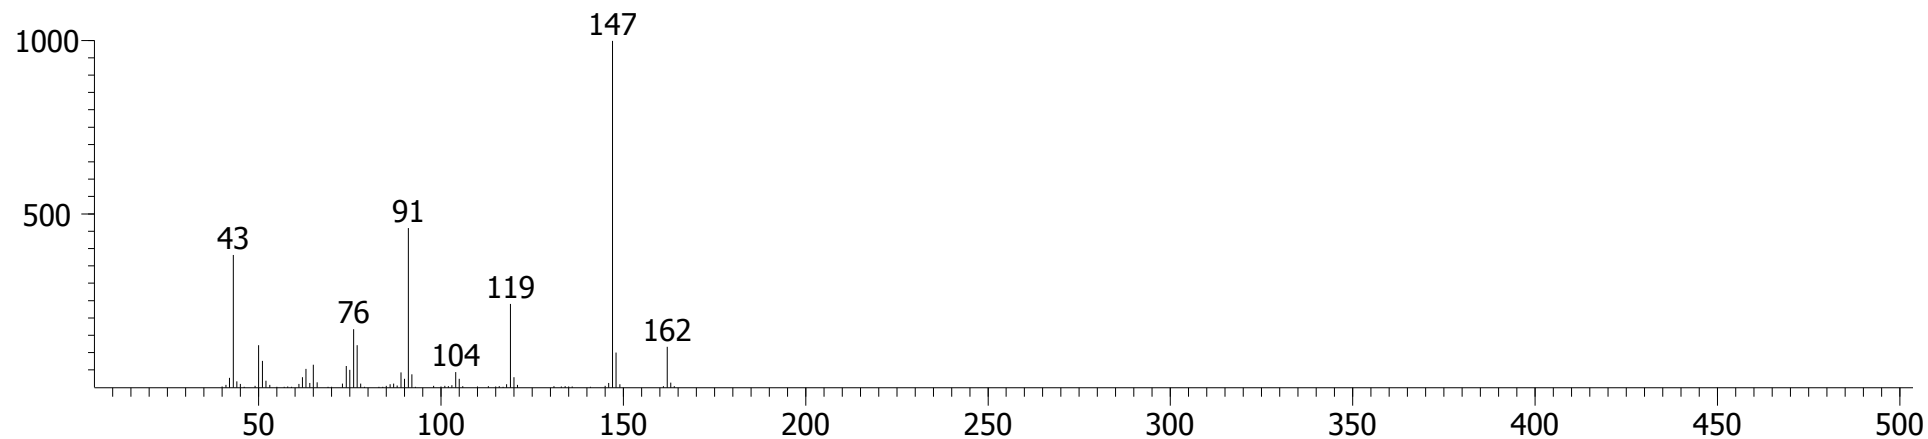

Sample 1, Fraction 1 (Hexane/DCM)

Naphthalene,

1,2,3,4-tetrahydro-1,4-dimethyl-

CAS # = 4175-54-6

1st Dimension R.T. = 935.808

2nd Dimension R.T. = 0.957

Quant Mass(es) = 160

S/N = 72.012

Area = 7428.4

Height = 1117.6



Peak True - sample "Lipid BM 1 F1:1", peak 574, at 935.808 , 0.957 sec , sec (Spec # 51025)

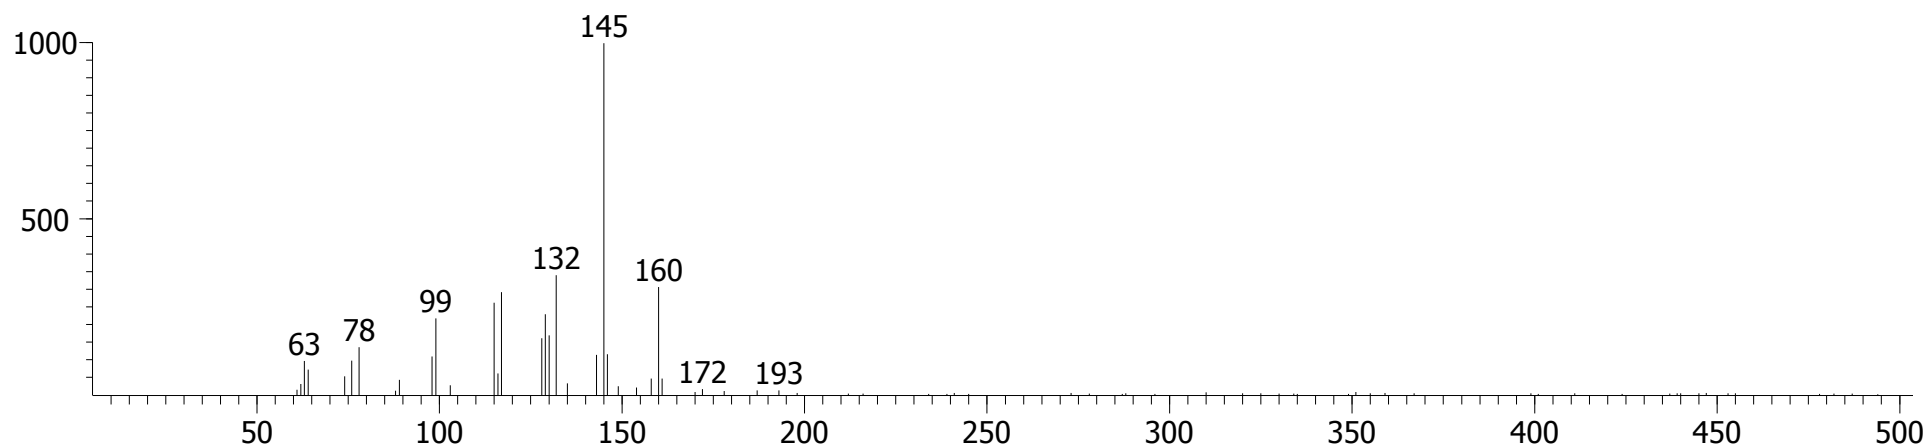

Library Hit - similarity 771, "Naphthalene, 1,2,3,4-tetrahydro-1,4-dimethyl-"



Sample 1, Fraction 1 (Hexane/DCM)

Naphthalene, 2-ethyl-

CAS # = 939-27-5  
1st Dimension R.T. = 946.302  
2nd Dimension R.T. = 0.990  
Quant Mass(es) = 156  
S/N = 170.18  
Area = 8156.6  
Height = 1161.6

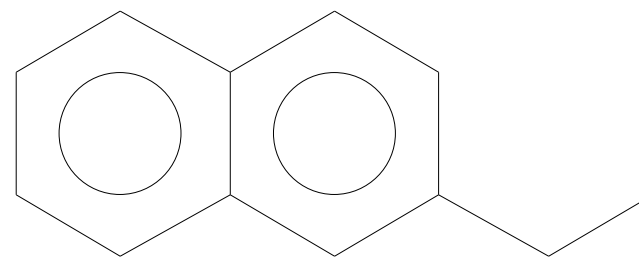

Peak True - sample "Lipid BM 1 F1:1", peak 594, at 946.302 , 0.990 sec , sec (Spec # 52620)

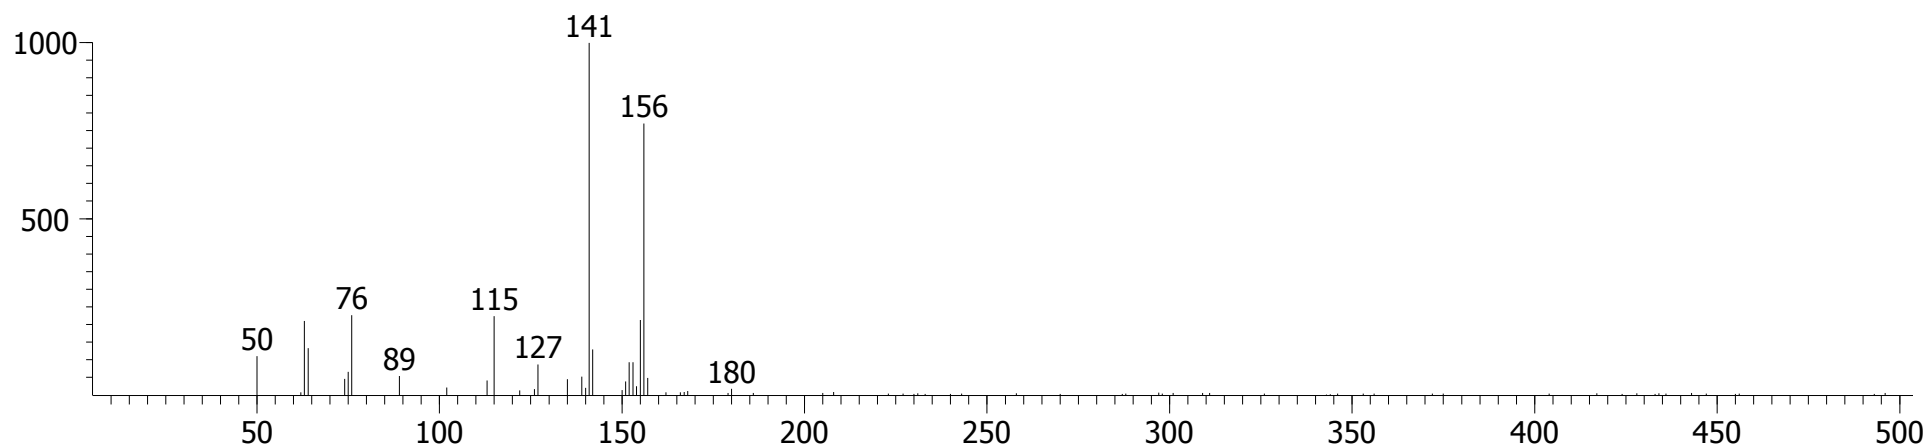

Library Hit - similarity 844, "Naphthalene, 2-ethyl-"

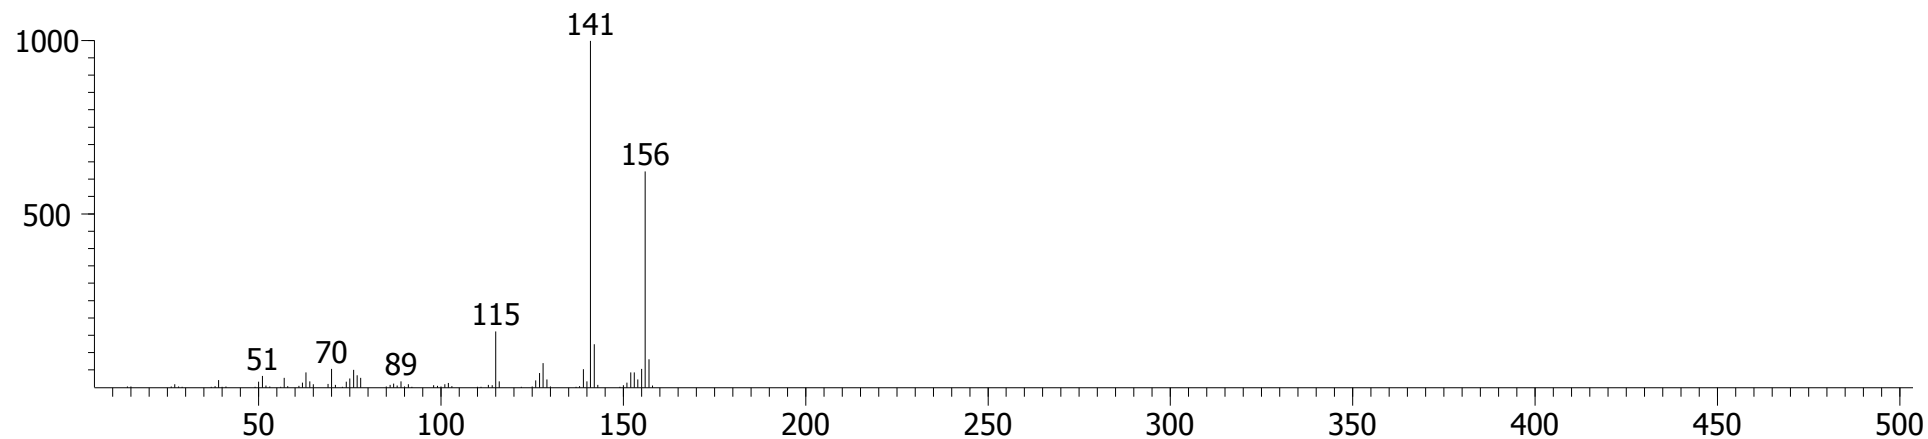

Sample 1, Fraction 1 (Hexane/DCM)

Ethanone, 1,1'-(1,3-phenylene)bis-

(1,3-Diacetylbenzene)

CAS # = 6781-42-6  
1st Dimension R.T. = 946.302  
2nd Dimension R.T. = 1.043  
Quant Mass(es) = 162  
S/N = 124.66  
Area = 2316.6  
Height = 304.45

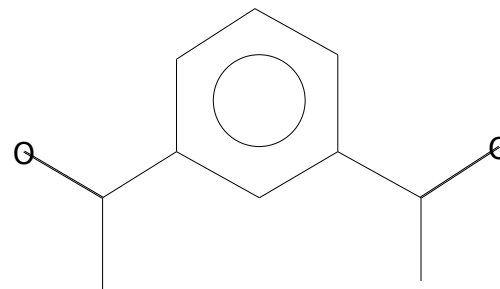

Peak True - sample "Lipid BM 1 F1:1", peak 595, at 946.302 , 1.043 sec , sec (Spec # 52628)

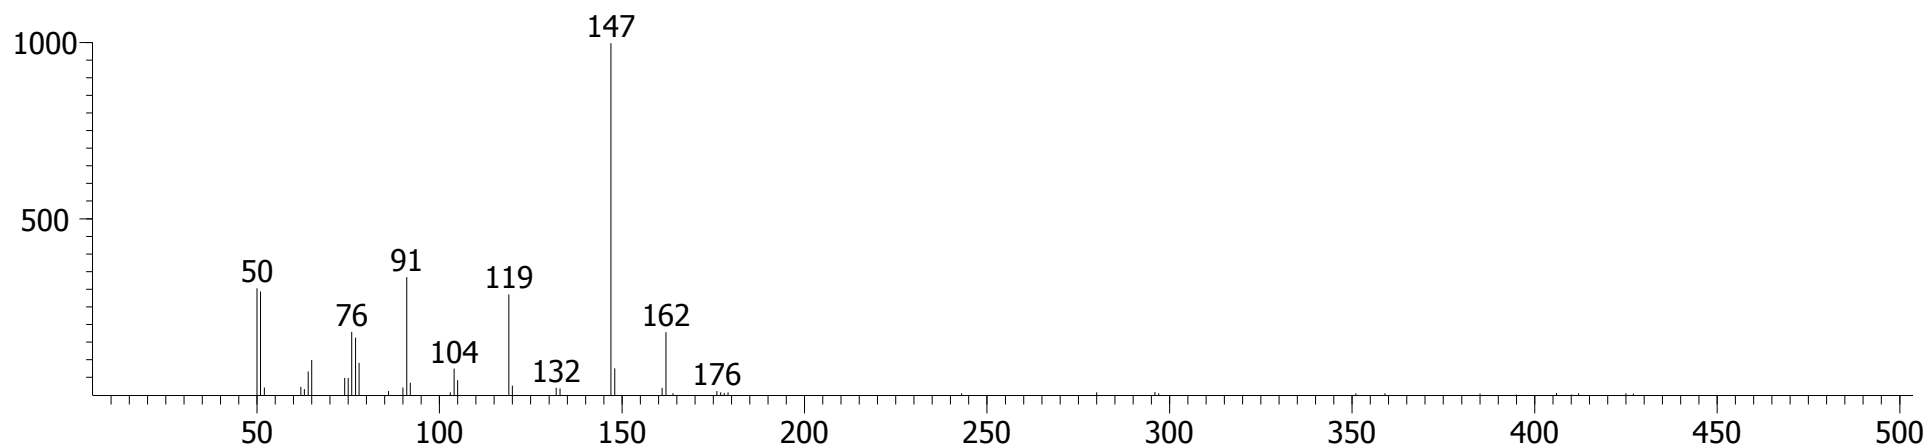

Library Hit - similarity 825, "Ethanone, 1,1'-(1,3-phenylene)bis-"

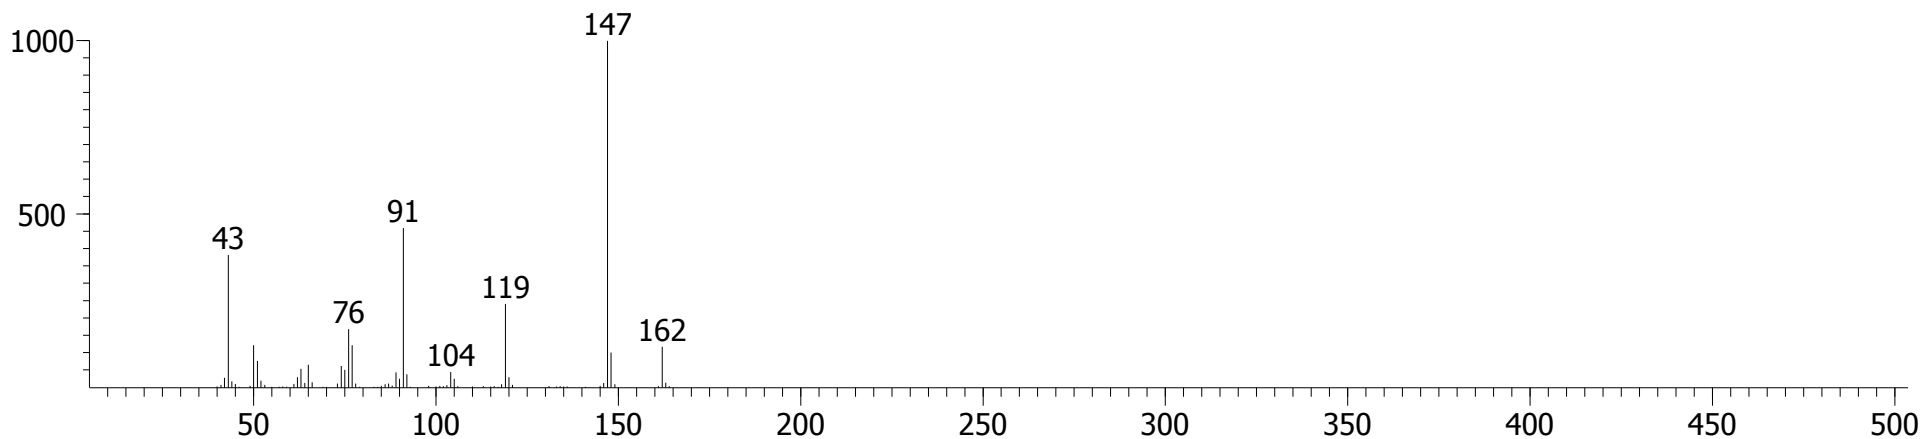



Sample 1, Fraction 1 (Hexane/DCM)

Benzaldehyde, 4-pentyl-

CAS # = 6853-57-2  
1st Dimension R.T. = 949.8  
2nd Dimension R.T. = 0.937  
Quant Mass(es) = 176  
S/N = 110.89  
Area = 5909.6  
Height = 851.43

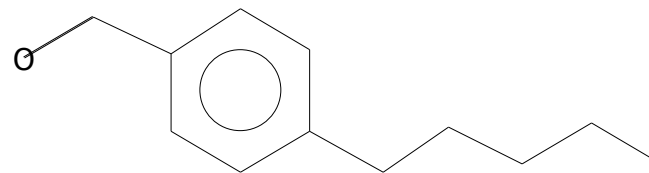

Peak True - sample "Lipid BM 1 F1:1", peak 602, at 949.8 , 0.937 sec , sec (Spec # 53142)

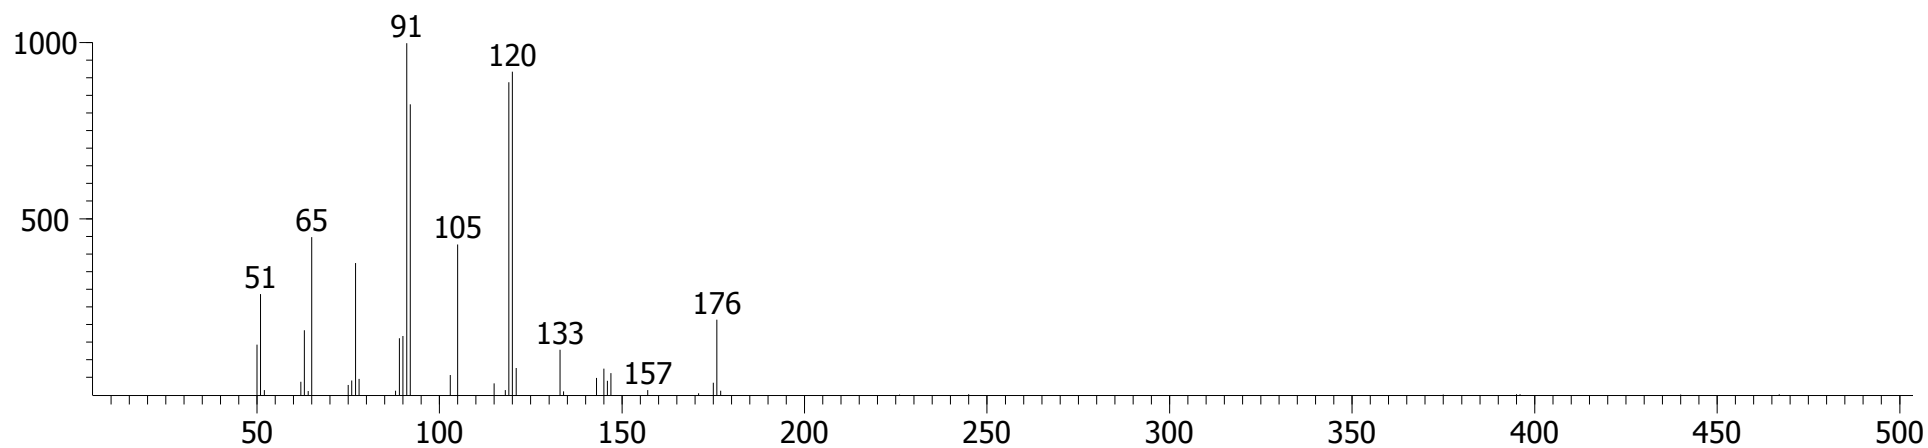

Library Hit - similarity 807, "Benzaldehyde, 4-pentyl-"

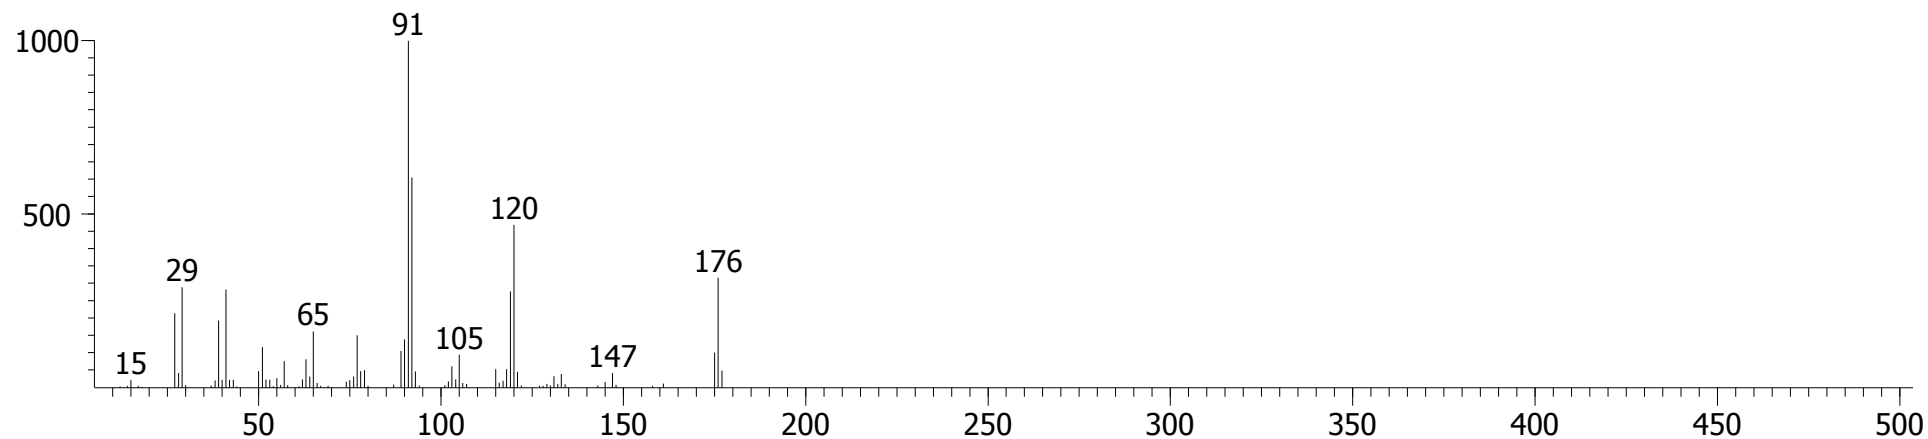

Sample 1, Fraction 1 (Hexane/DCM)

Naphthalene, 1,7-dimethyl-

CAS # = 575-37-1  
1st Dimension R.T. = 949.8  
2nd Dimension R.T. = 0.997  
Quant Mass(es) = 156  
S/N = 151.12  
Area = 7230.8  
Height = 1031.9

1,7-Dimethylnaphthalene

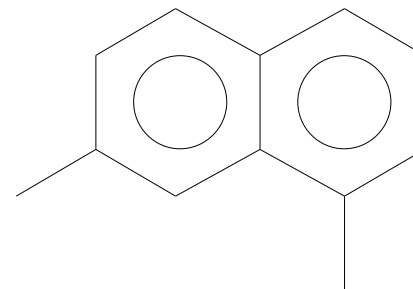

Peak True - sample "Lipid BM 1 F1:1", peak 603, at 949.8 , 0.997 sec , sec (Spec # 53151)

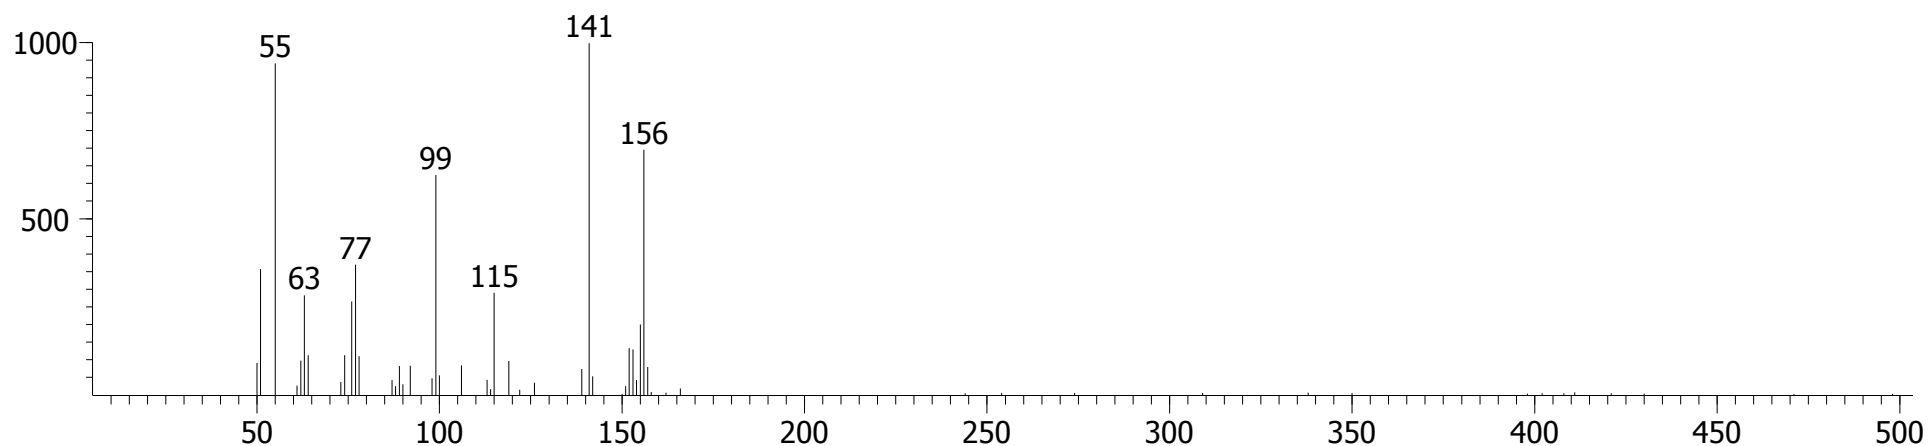

Library Hit - similarity 760, "Naphthalene, 1,7-dimethyl-"

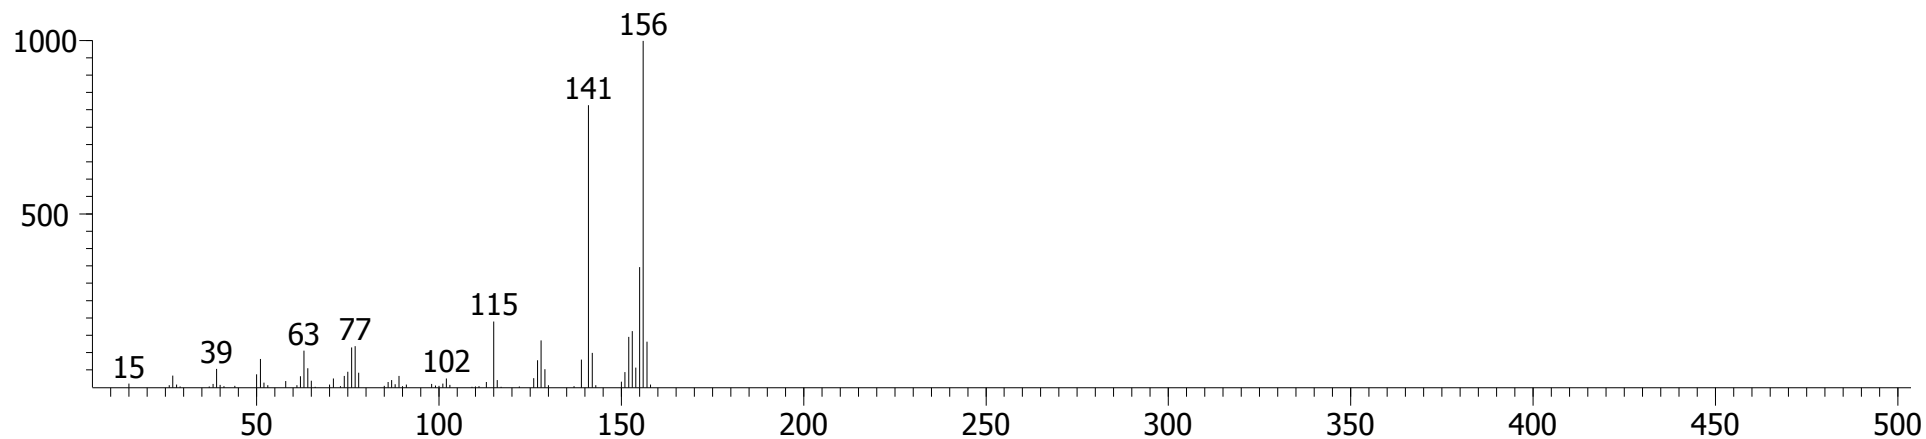

Sample 1, Fraction 1 (Hexane/DCM)

Naphthalene, 1-ethyl-

CAS # = 1127-76-0  
1st Dimension R.T. = 960.294  
2nd Dimension R.T. = 1.003  
Quant Mass(es) = 156  
S/N = 202.20  
Area = 4939.1  
Height = 832.98

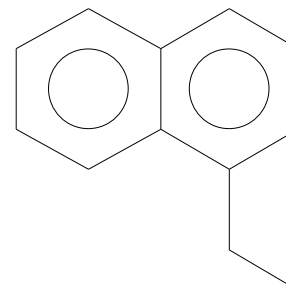

Peak True - sample "Lipid BM 1 F1:1", peak 625, at 960.294 , 1.003 sec , sec (Spec # 54742)

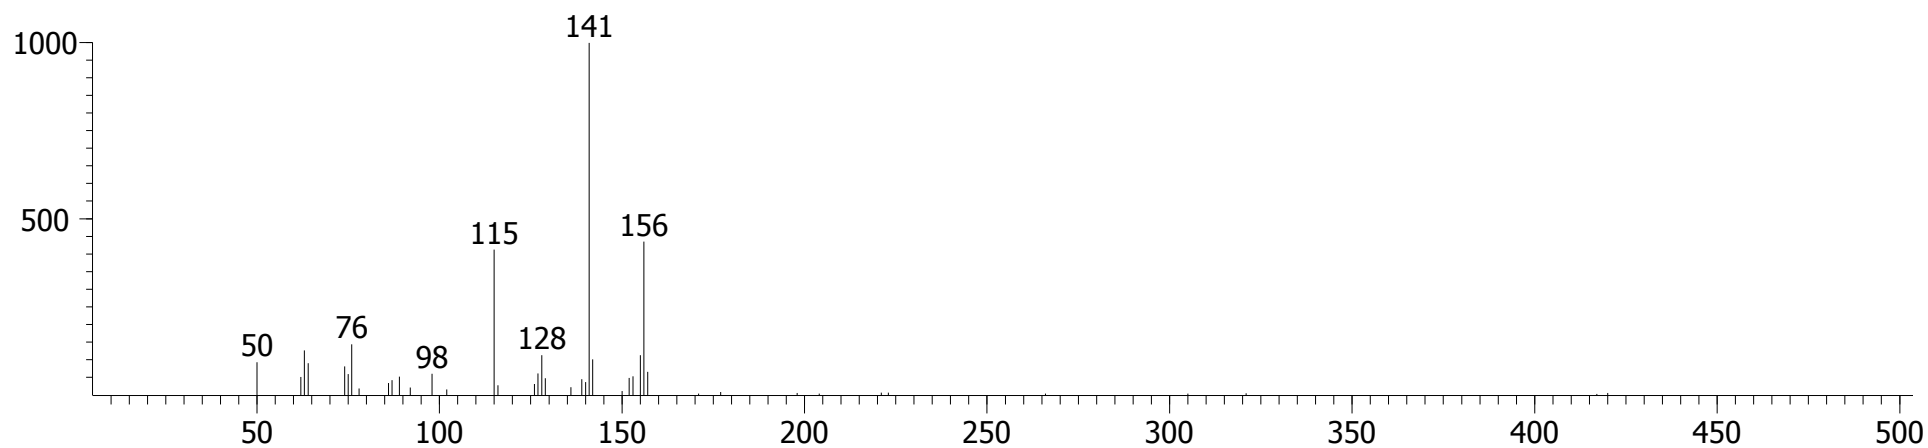

Library Hit - similarity 893, "Naphthalene, 1-ethyl-"

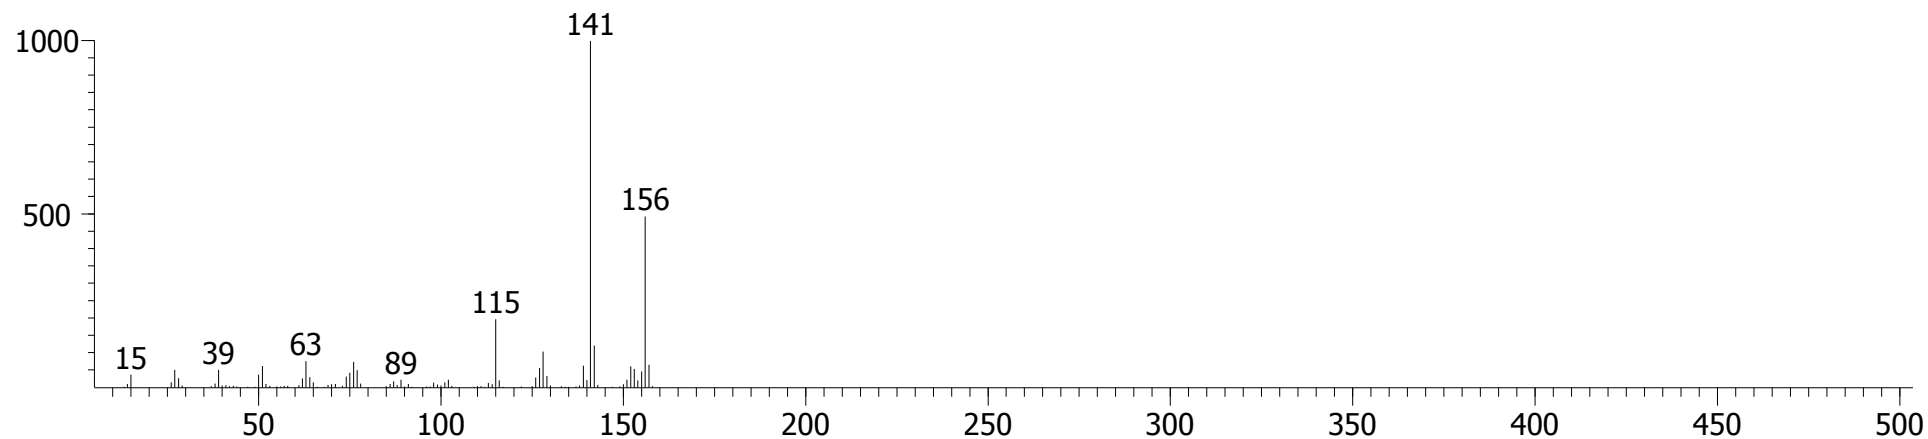

Sample 1, Fraction 1 (Hexane/DCM)

1,1'-Biphenyl, 4-methyl-

(4-Methylbiphenyl)

CAS # = 644-08-6  
1st Dimension R.T. = 974.286  
2nd Dimension R.T. = 0.990  
Quant Mass(es) = 168  
S/N = 406.72  
Area = 38772  
Height = 3313.7

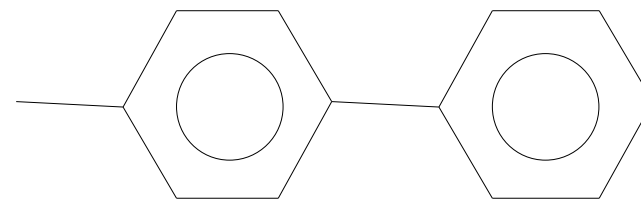

Peak True - sample "Lipid BM 1 F1:1", peak 649, at 974.286 , 0.990 sec , sec (Spec # 56860)

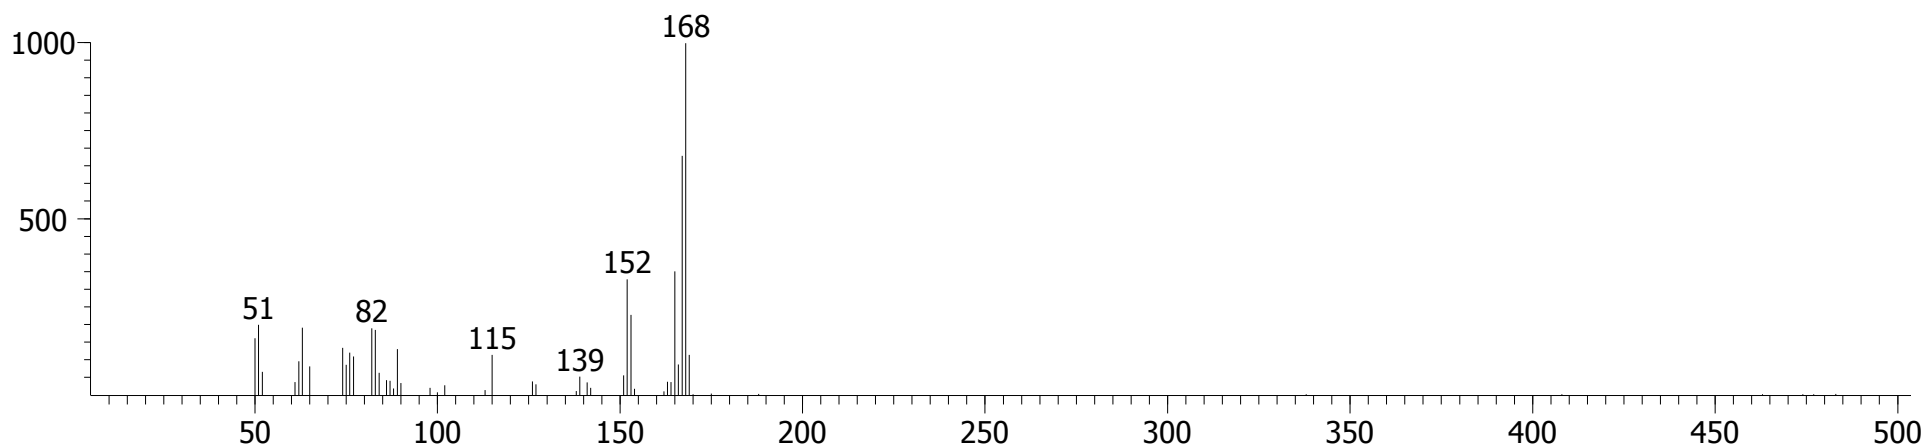

Library Hit - similarity 929, "1,1'-Biphenyl, 4-methyl-"

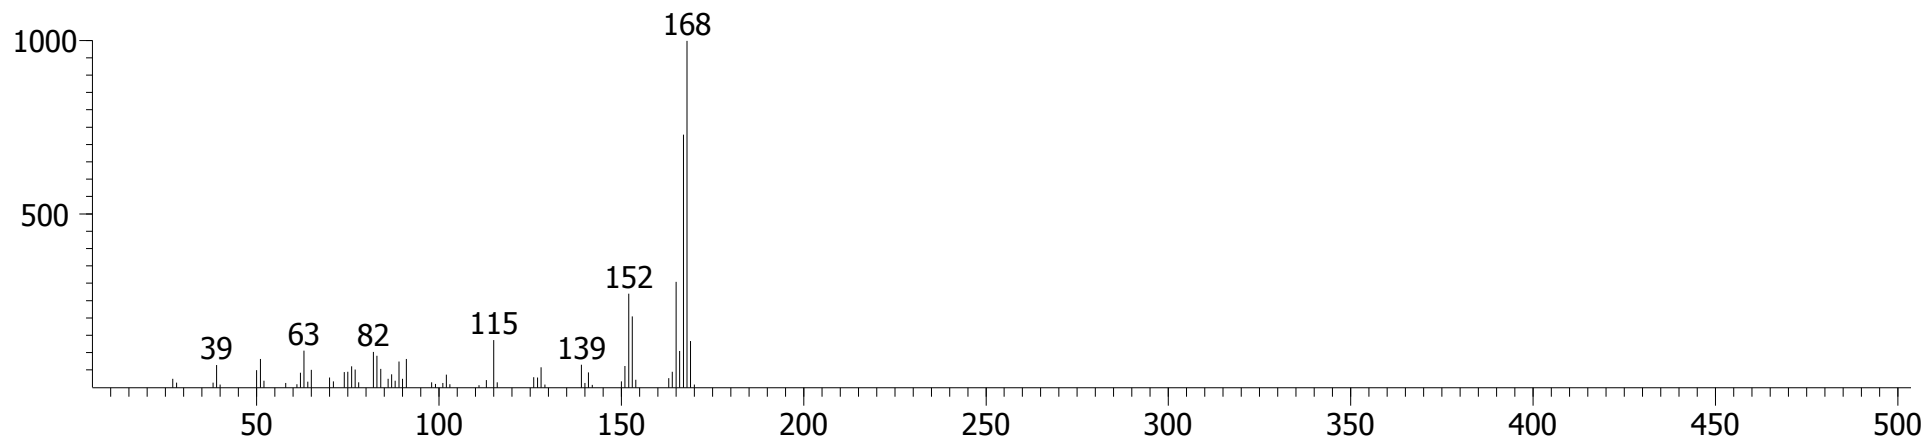

Sample 1, Fraction 1 (Hexane/DCM)

UNKNOWN # 2

CAS # = 5202-86-8  
1st Dimension R.T. = 974.286  
2nd Dimension R.T. = 1.036  
Quant Mass(es) = 183  
S/N = 453.98  
Area = 3464.2  
Height = 580.38

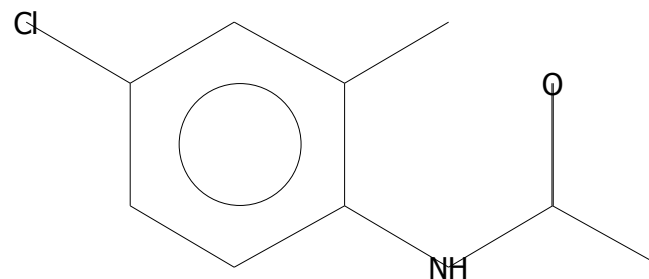

Peak True - sample "Lipid BM 1 F1:1", peak 650, at 974.286 , 1.036 sec , sec (Spec # 56867)

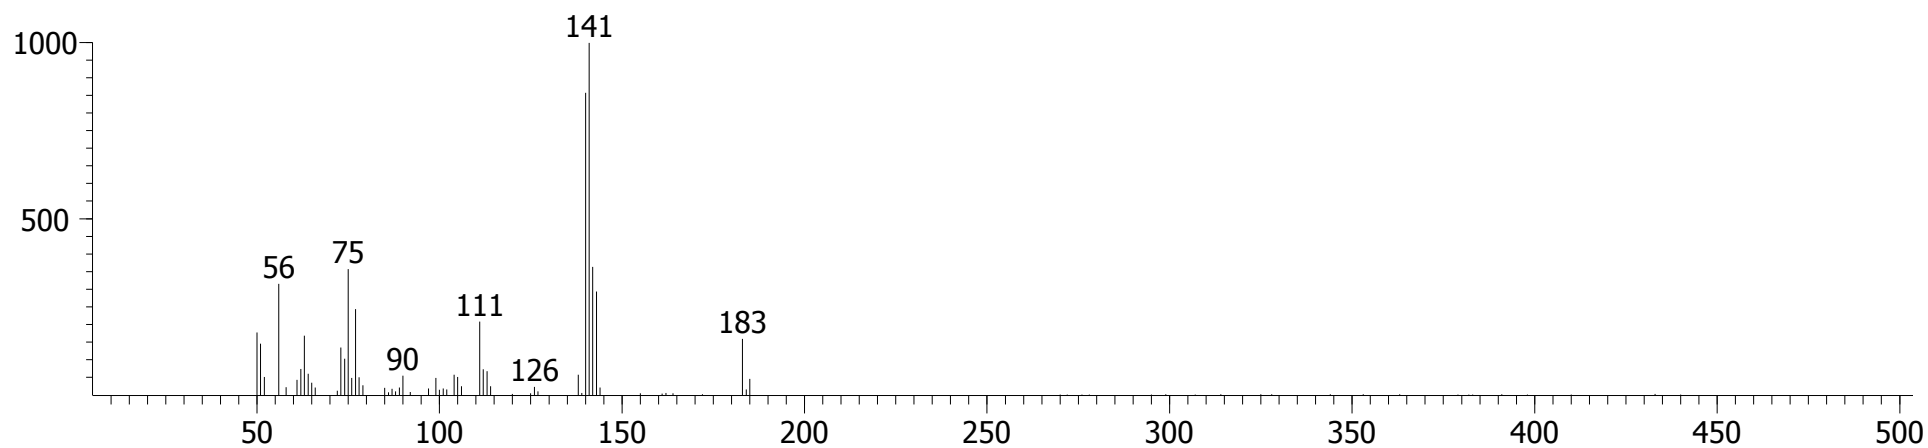

Library Hit - similarity 681, "Acetamide, N-(4-chloro-2-methylphenyl)-"

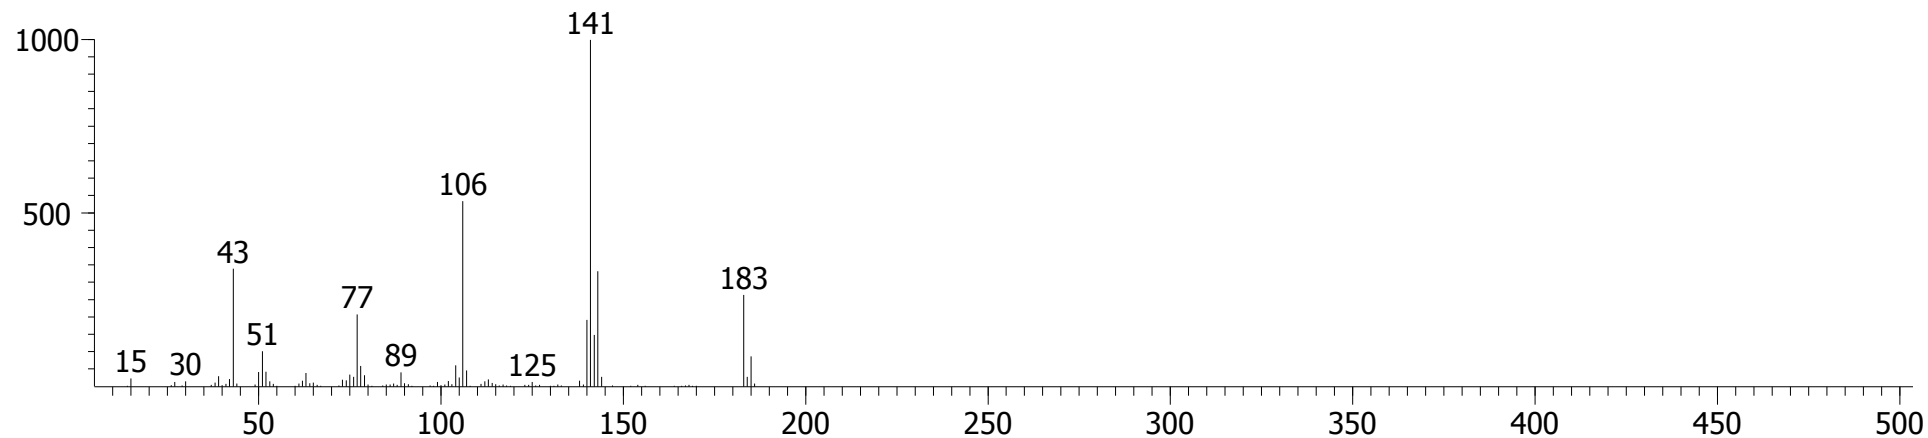

Sample 1, Fraction 1 (Hexane/DCM)

Benzenamine, 4-chloro-N-methyl-

CAS # = 932-96-7  
1st Dimension R.T. = 977.784  
2nd Dimension R.T. = 1.043  
Quant Mass(es) = 140  
S/N = 96.569  
Area = 3242.2  
Height = 601.19

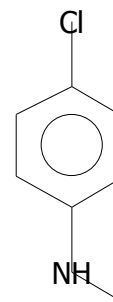

(4-Chloro-N-methylaniline)

Peak True - sample "Lipid BM 1 F1:1", peak 655, at 977.784 , 1.043 sec , sec (Spec # 57398)

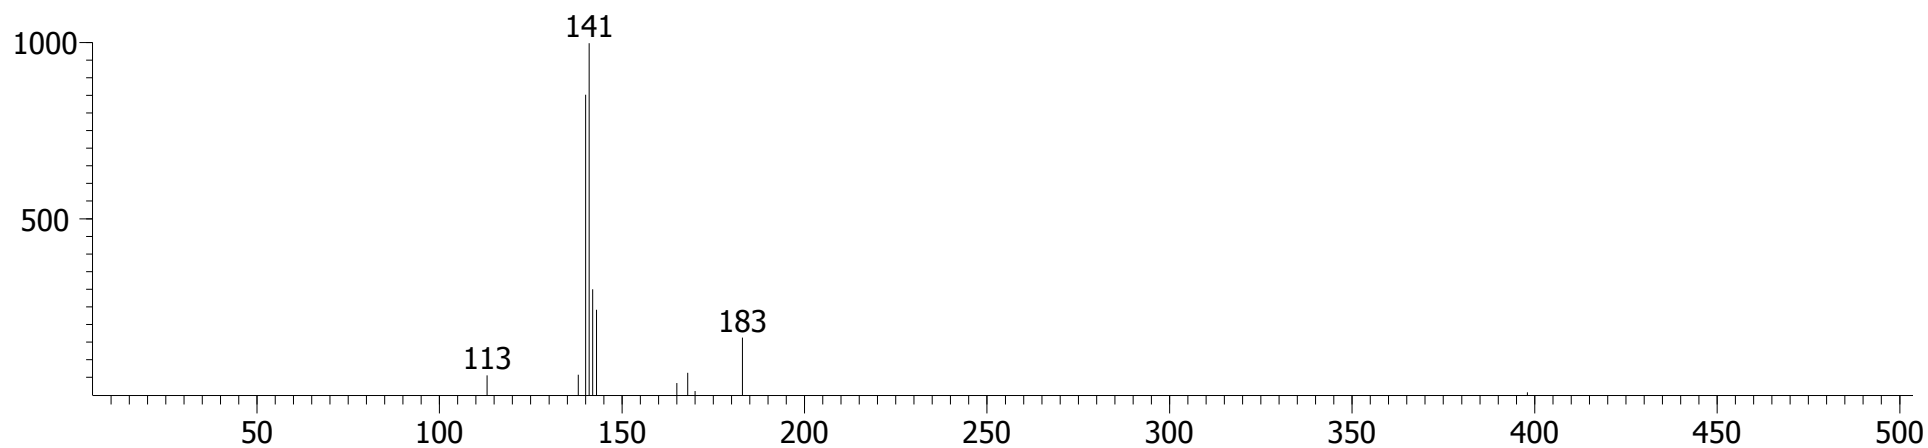

Library Hit - similarity 810, "Benzenamine, 4-chloro-N-methyl-"

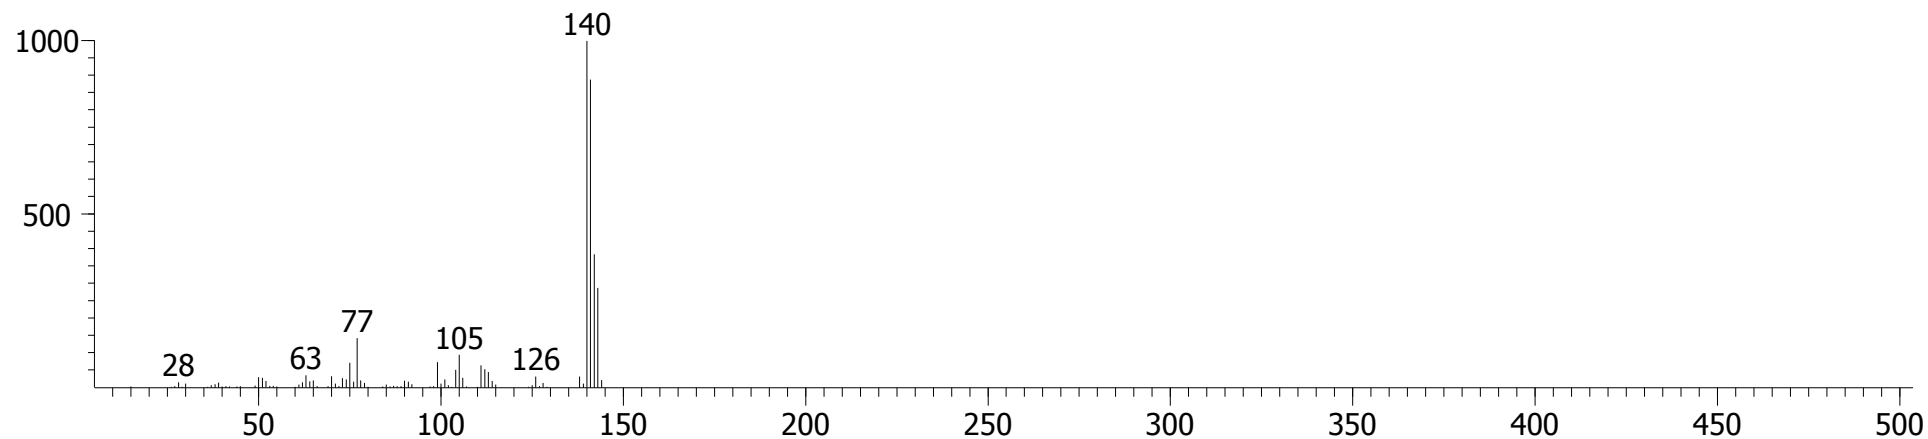

Sample 1, Fraction 1 (Hexane/DCM)

Acenaphthene

CAS # = 83-32-9  
1st Dimension R.T. = 984.78  
2nd Dimension R.T. = 1.043  
Quant Mass(es) = 154  
S/N = 138.43  
Area = 5920.0  
Height = 1027.7

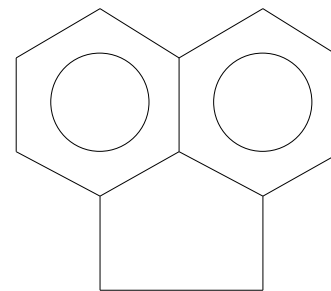

Peak True - sample "Lipid BM 1 F1:1", peak 664, at 984.78 , 1.043 sec , sec (Spec # 58458)

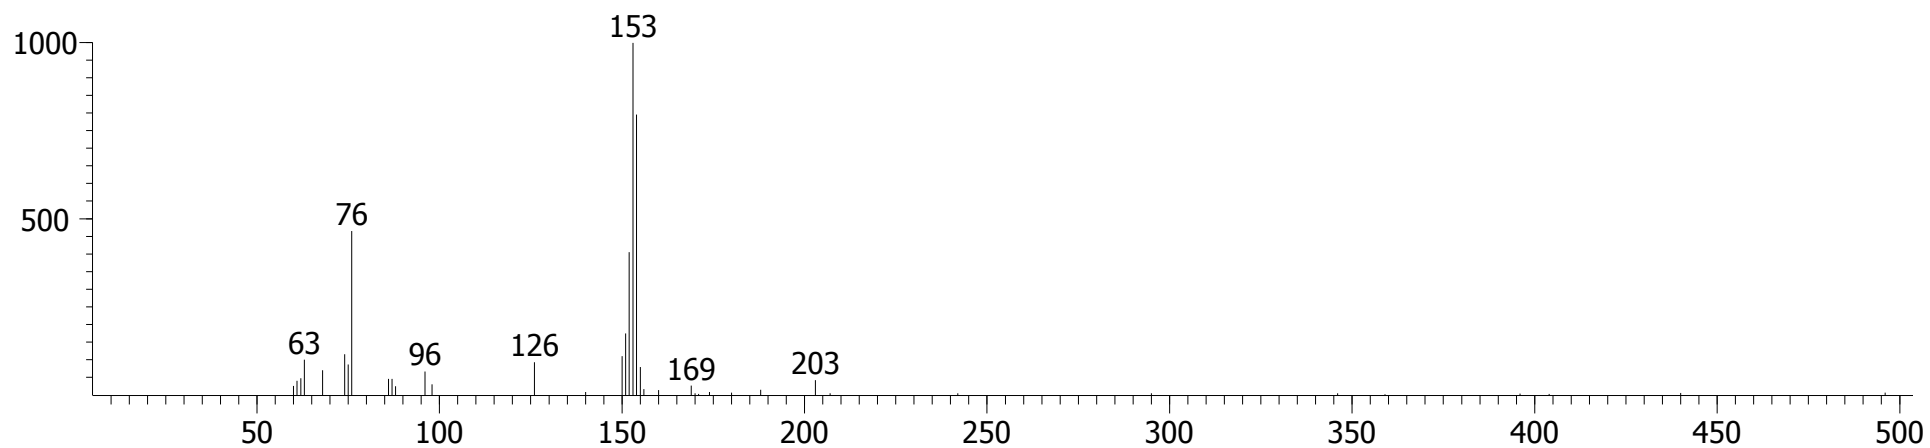

Library Hit - similarity 914, "Acenaphthene"

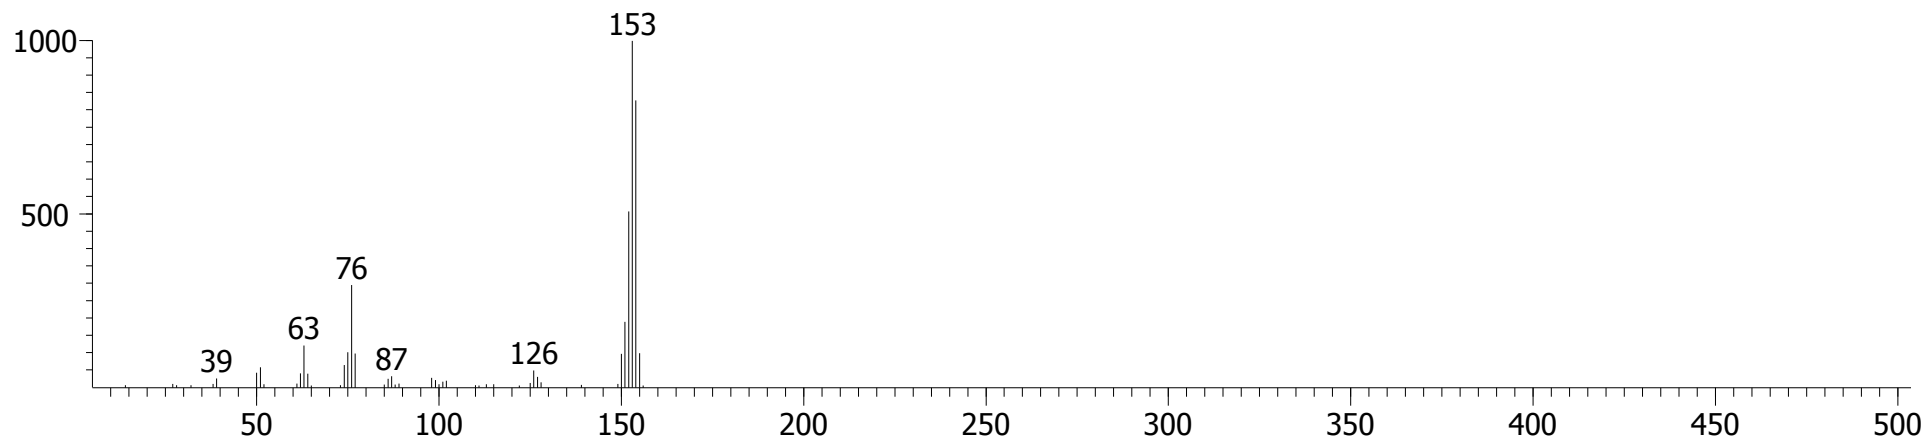

Sample 1, Fraction 1 (Hexane/DCM)

Naphthalene, 2-(1-methylethyl)-

CAS # = 2027-17-0  
1st Dimension R.T. = 998.772  
2nd Dimension R.T. = 0.990  
Quant Mass(es) = 170  
S/N = 130.77  
Area = 2581.3  
Height = 368.83

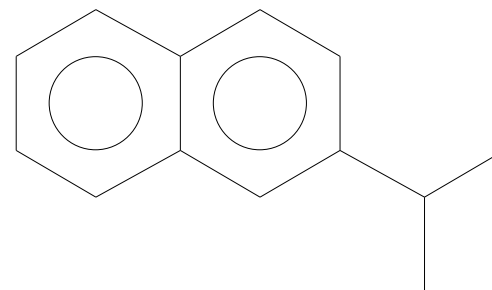

Peak True - sample "Lipid BM 1 F1:1", peak 692, at 998.772 , 0.990 sec , sec (Spec # 60570)

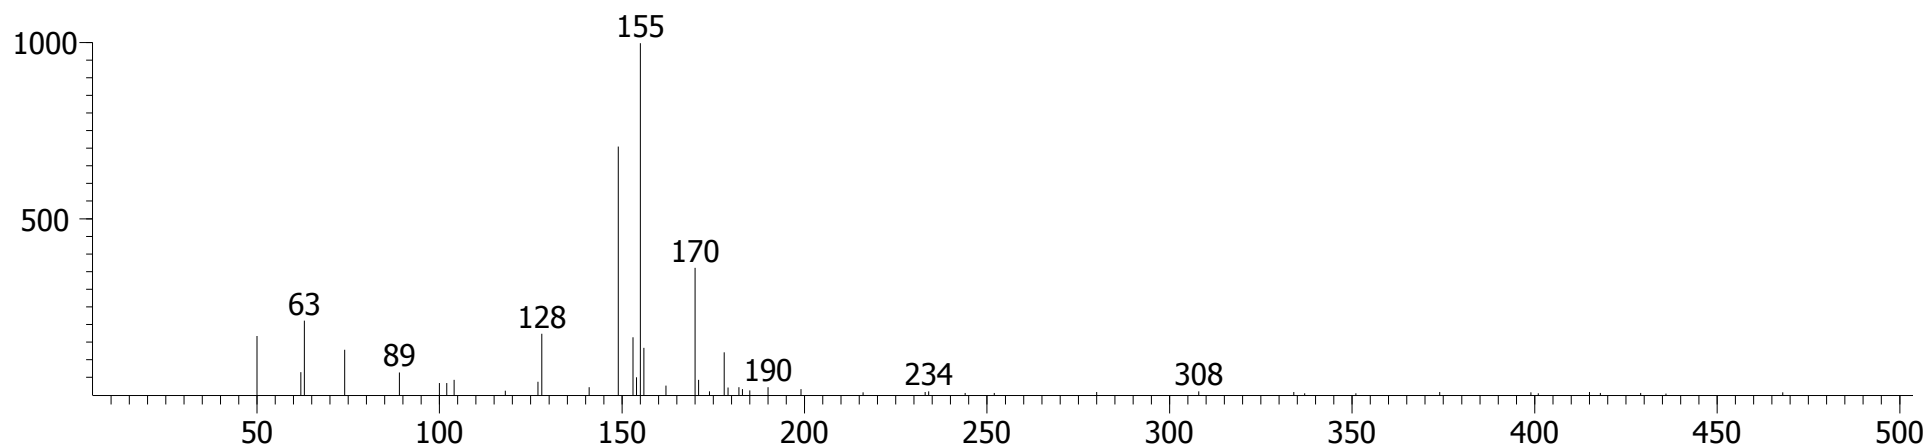

Library Hit - similarity 673, "Naphthalene, 2-(1-methylethyl)-"

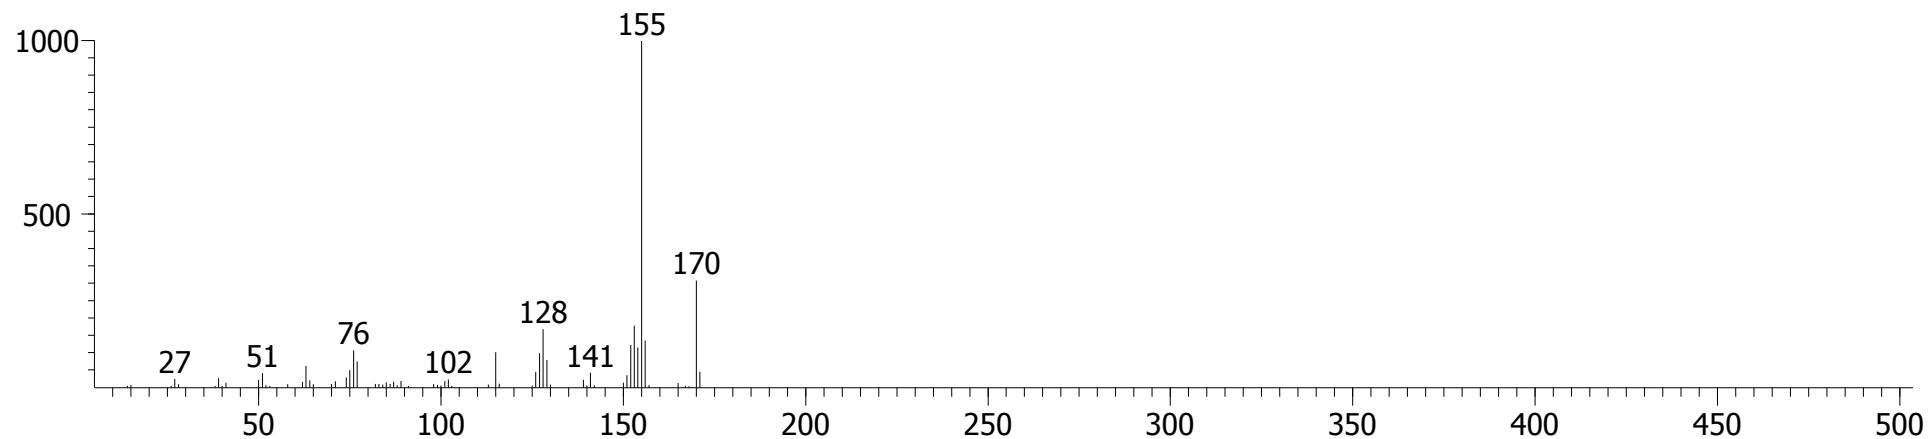



Sample 1, Fraction 1 (Hexane/DCM)

Naphthalene, 1,4,5-trimethyl-

CAS # = 2131-41-1  
1st Dimension R.T. = 1005.77  
2nd Dimension R.T. = 0.983  
Quant Mass(es) = 170  
S/N = 385.88  
Area = 34802  
Height = 5576.1

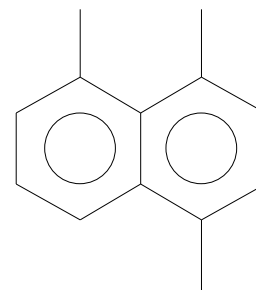

(1,4,5-Trimethylnaphthalene)

Peak True - sample "Lipid BM 1 F1:1", peak 706, at 1005.77 , 0.983 sec , sec (Spec # 61629)

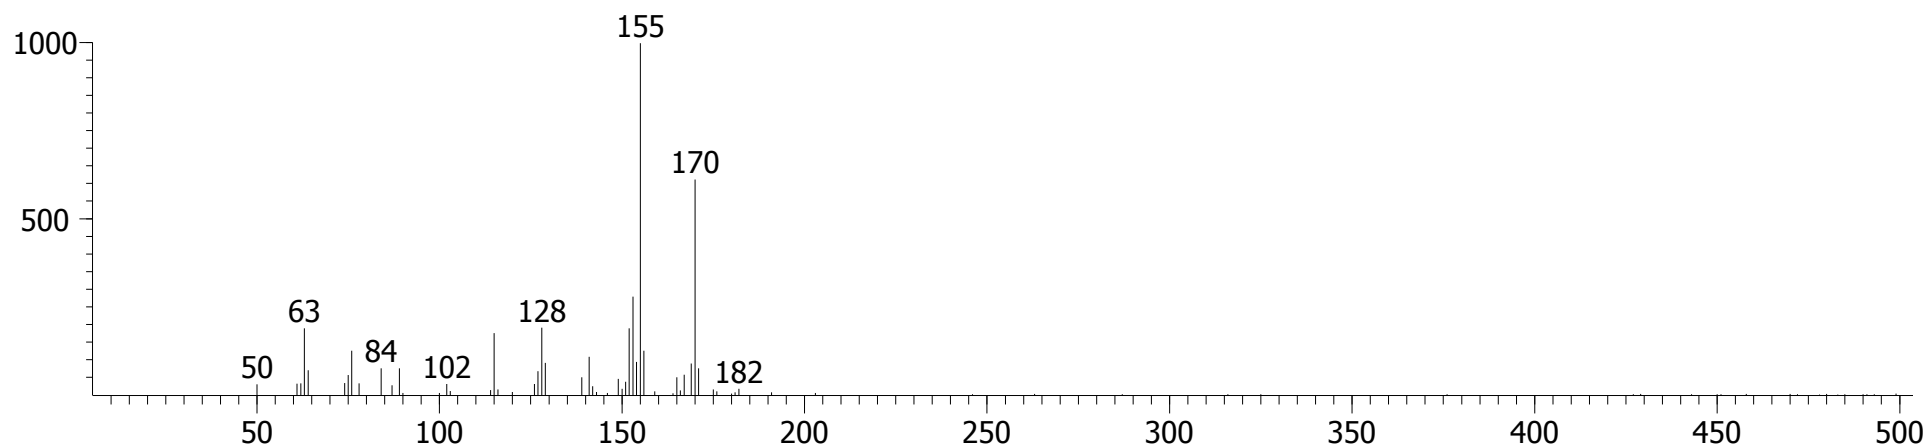

Library Hit - similarity 934, "Naphthalene, 1,4,5-trimethyl-"

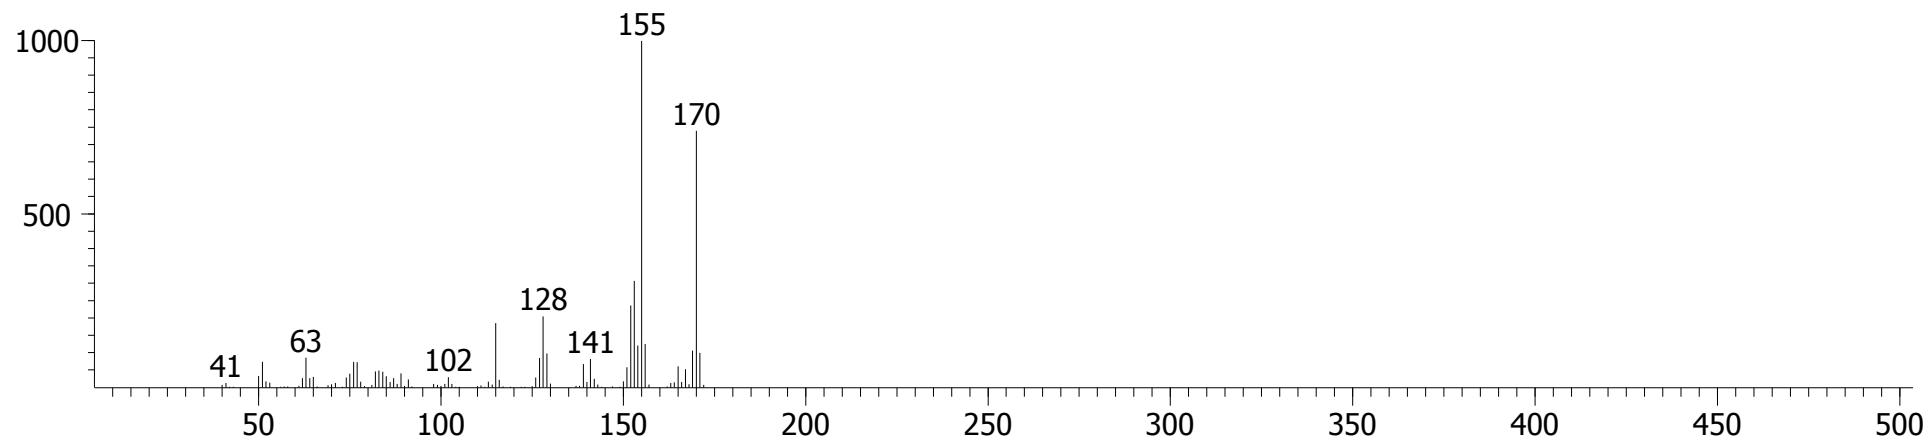

Sample 1, Fraction 1 (Hexane/DCM)

Dibenzofuran

CAS # = 132-64-9  
1st Dimension R.T. = 1005.77  
2nd Dimension R.T. = 1.036  
Quant Mass(es) = 168  
S/N = 266.15  
Area = 16147  
Height = 2300.3

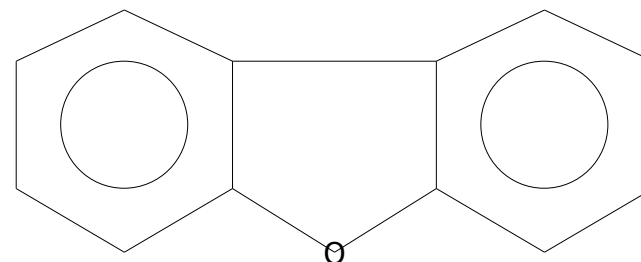

Peak True - sample "Lipid BM 1 F1:1", peak 707, at 1005.77 , 1.036 sec , sec (Spec # 61637)

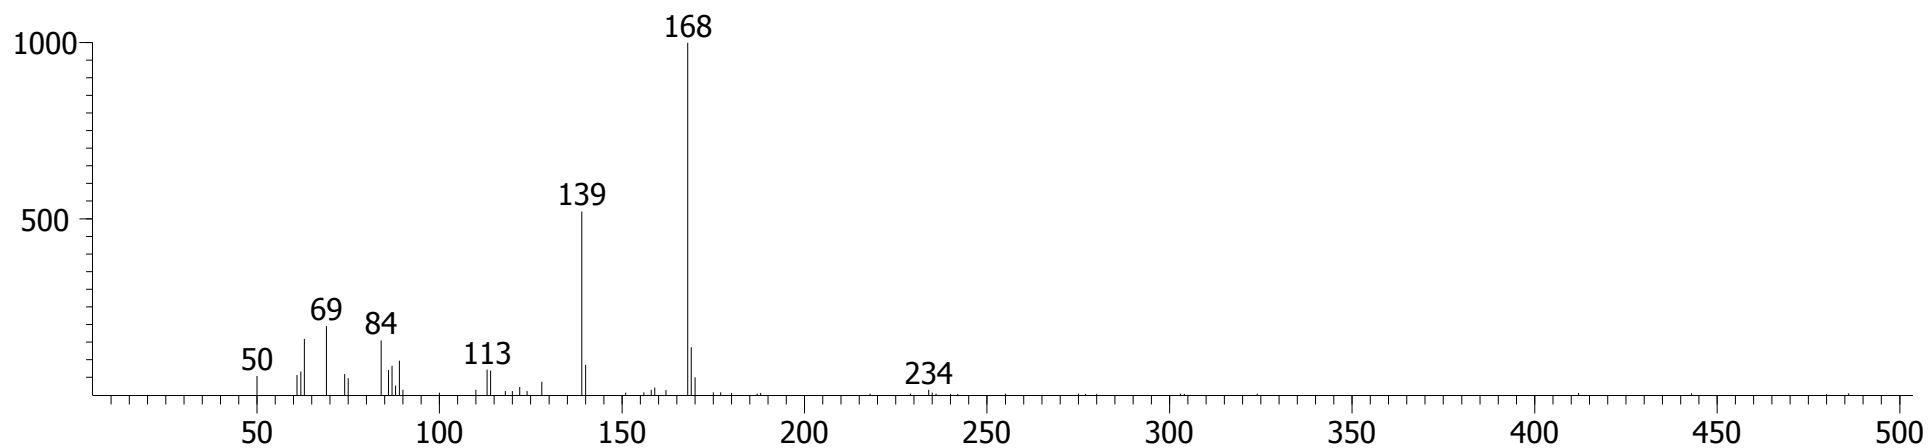

Library Hit - similarity 880, "Dibenzofuran"

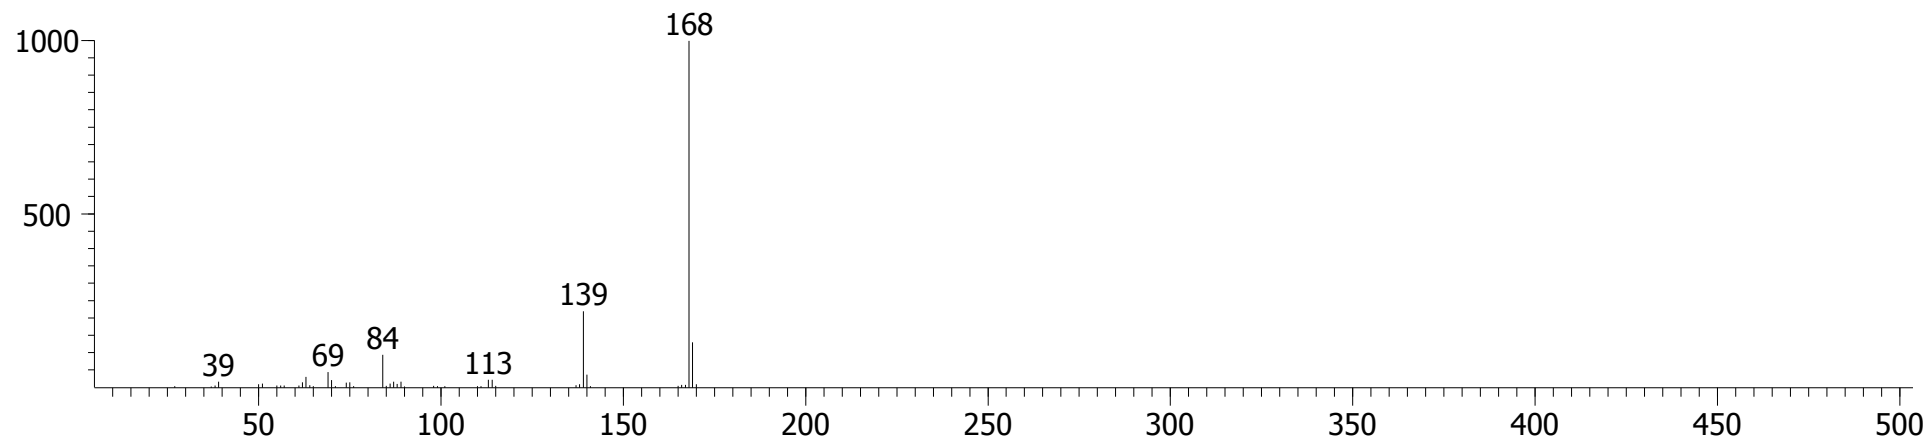

Sample 1, Fraction 1 (Hexane/DCM)

4-Chloroformanilide

(N-(4-Chlorophenyl)formamide)

CAS # = 2617-79-0  
1st Dimension R.T. = 1009.27  
2nd Dimension R.T. = 1.135  
Quant Mass(es) = 155  
S/N = 185.44  
Area = 8746.3  
Height = 1130.2

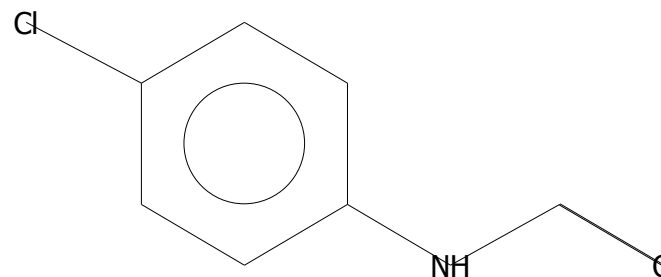

Peak True - sample "Lipid BM 1 F1:1", peak 718, at 1009.27 , 1.135 sec , sec (Spec # 62182)

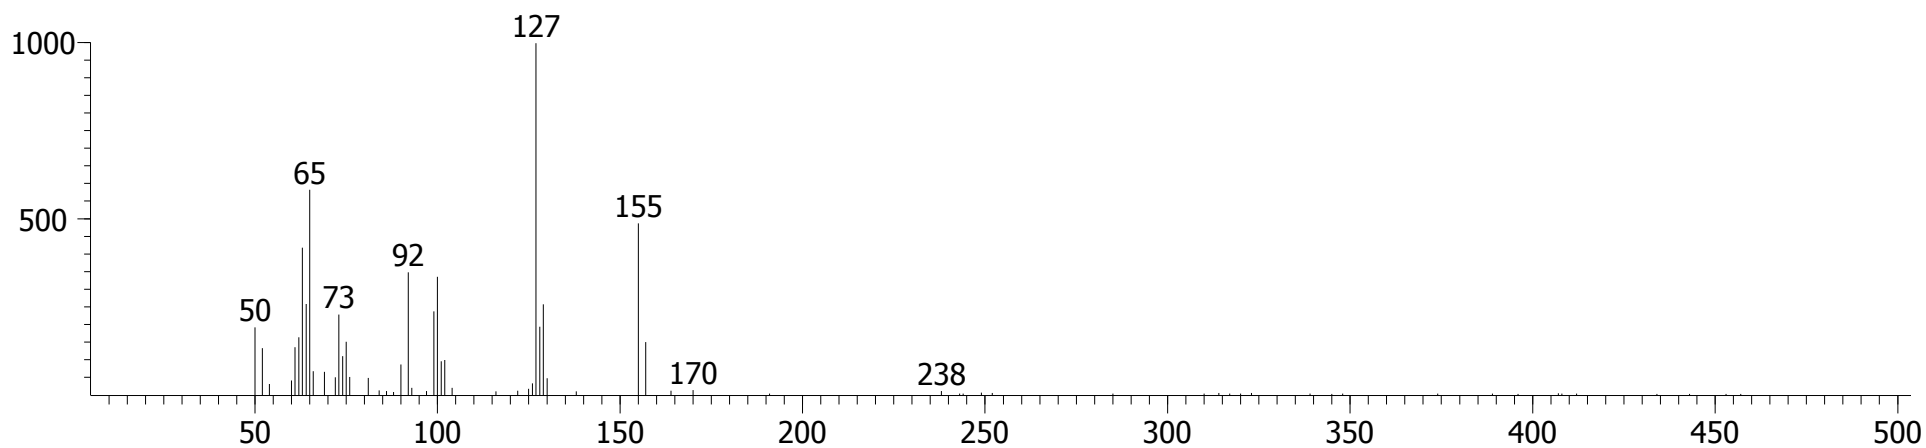

Library Hit - similarity 897, "4-Chloroformanilide"

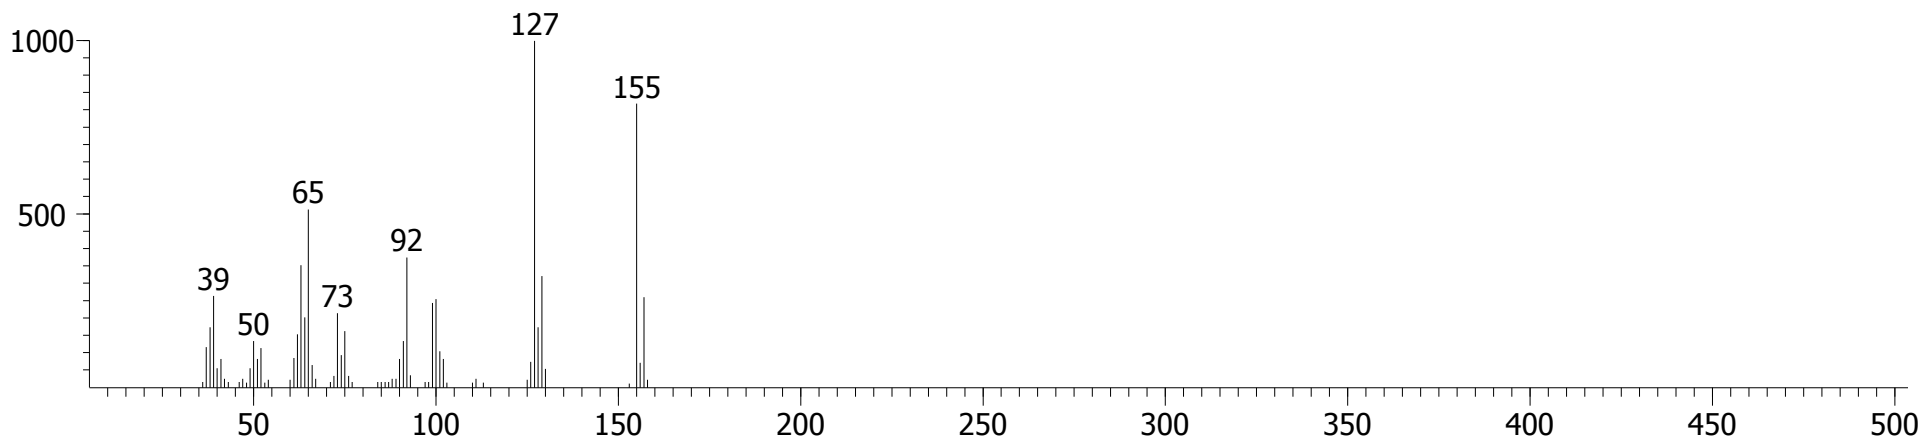

Sample 1, Fraction 1 (Hexane/DCM)

1H-Indene, 3-butyl-1-methyl-

CAS # = 111400-84-1  
1st Dimension R.T. = 1023.26  
2nd Dimension R.T. = 0.964  
Quant Mass(es) = 186  
S/N = 105.80  
Area = 3516.2  
Height = 570.55

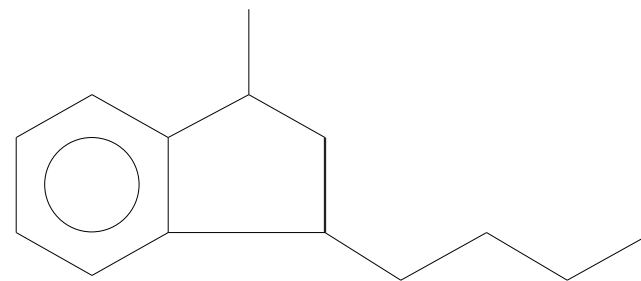

Peak True - sample "Lipid BM 1 F1:1", peak 749, at 1023.26 , 0.964 sec , sec (Spec # 64276)

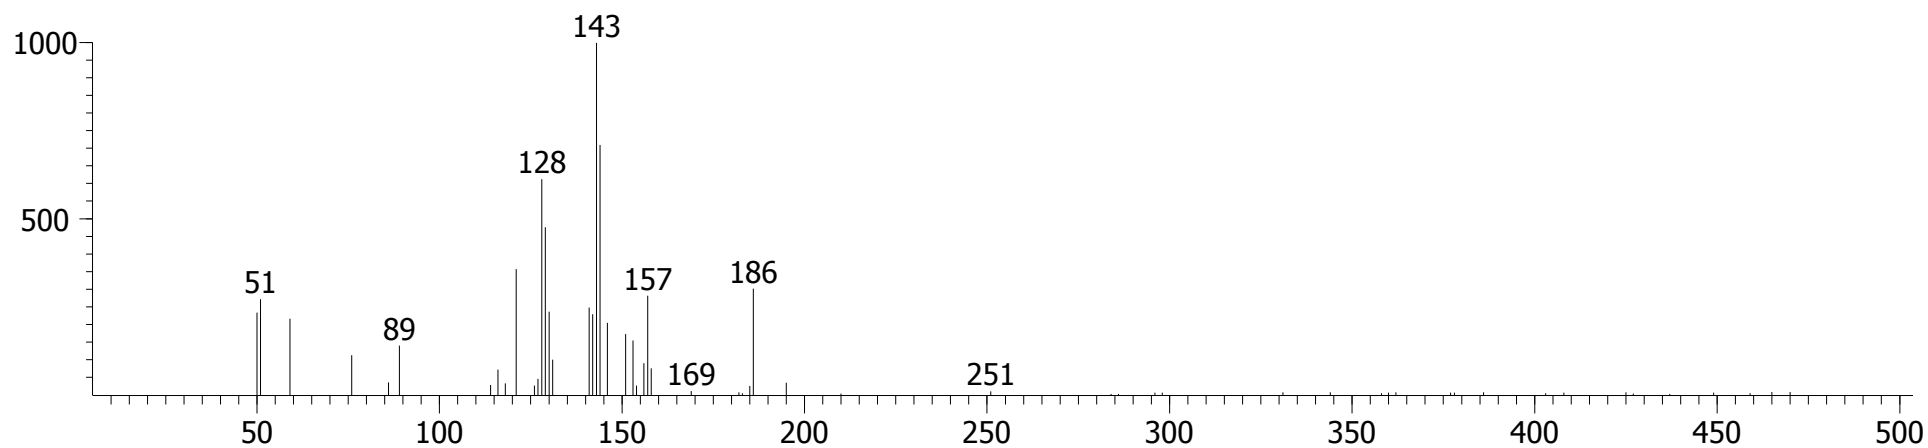

Library Hit - similarity 729, "1H-Indene, 3-butyl-1-methyl-"

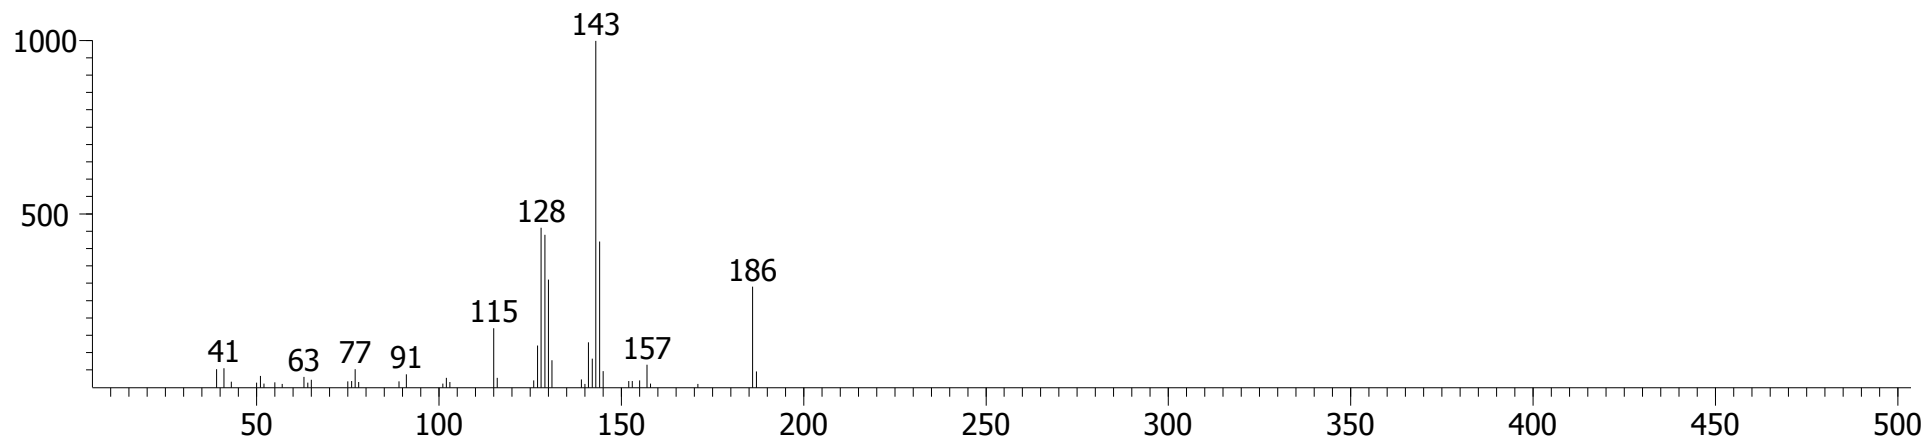

Sample 1, Fraction 1 (Hexane/DCM)

Naphthalene, 1,4,5-trimethyl-

CAS # = 2131-41-1  
1st Dimension R.T. = 1023.26  
2nd Dimension R.T. = 0.990  
Quant Mass(es) = 170  
S/N = 418.91  
Area = 24064  
Height = 4063.4



(1,4,5-Trimethylnaphthalene)

Peak True - sample "Lipid BM 1 F1:1", peak 750, at 1023.26 , 0.990 sec , sec (Spec # 64280)

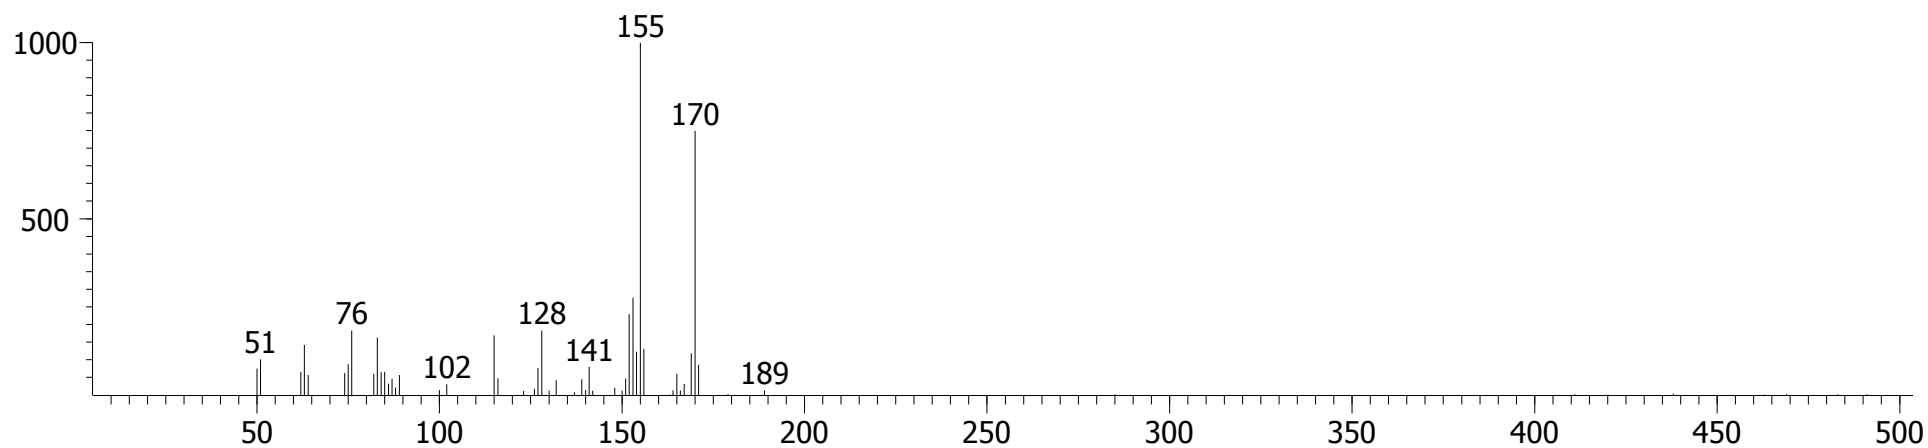

Library Hit - similarity 922, "Naphthalene, 1,4,5-trimethyl-"



Sample 1, Fraction 1 (Hexane/DCM)

Phenol, 2,4-bis(1,1-dimethylethyl)-

CAS # = 96-76-4  
1st Dimension R.T. = 1037.25  
2nd Dimension R.T. = 0.917  
Quant Mass(es) = 206  
S/N = 2253.6  
Area = 32011  
Height = 5867.6

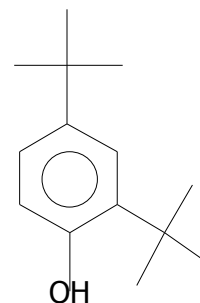

(2,4-Di-tert-butylphenol)

Peak True - sample "Lipid BM 1 F1:1", peak 770, at 1037.25 , 0.917 sec , sec (Spec # 66389)

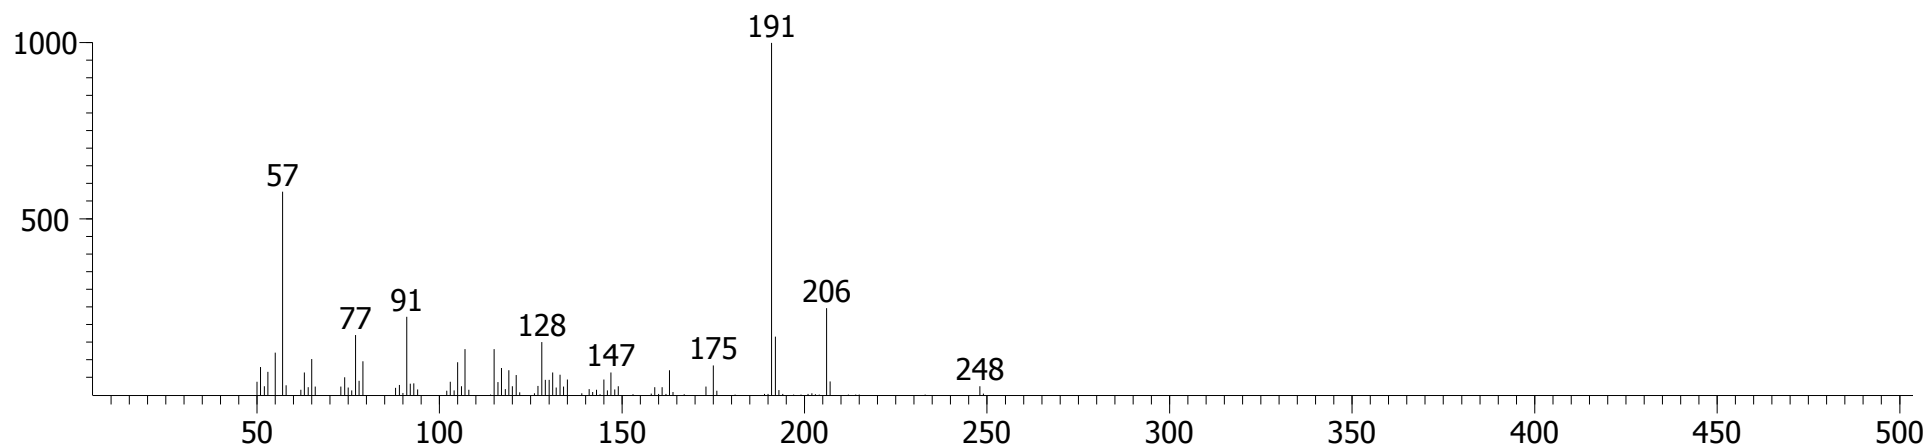

Library Hit - similarity 872, "Phenol, 2,4-bis(1,1-dimethylethyl)-"

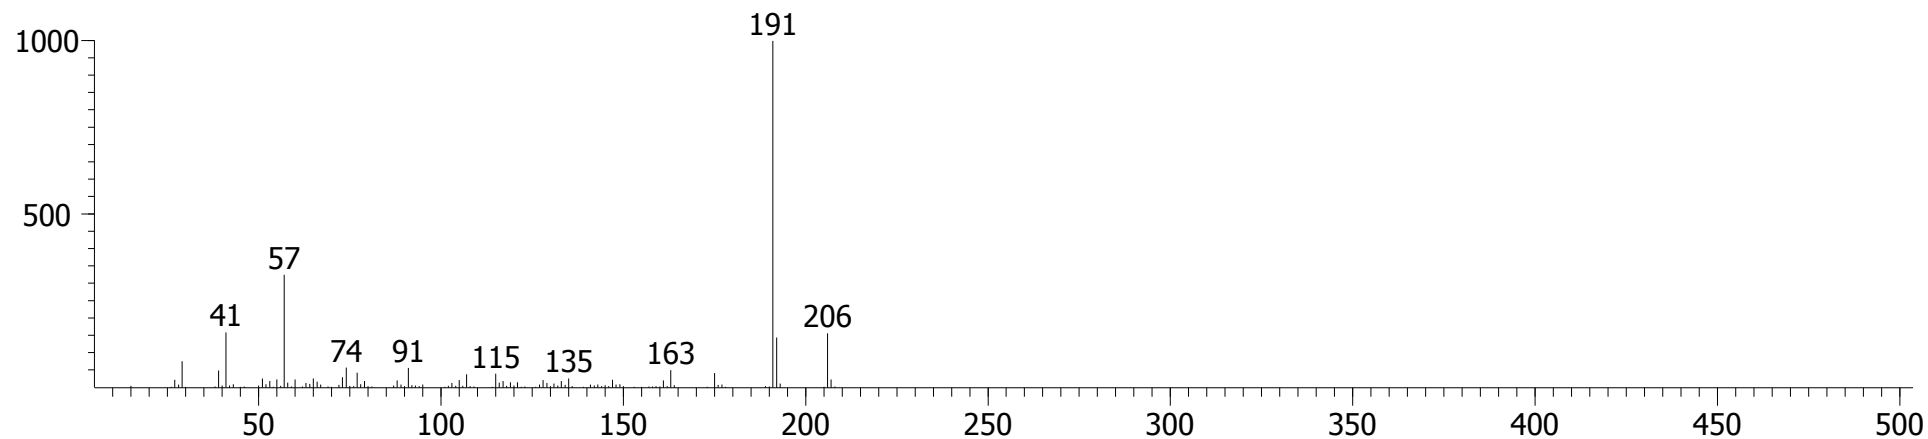

Sample 1, Fraction 1 (Hexane/DCM)

Naphthalene, 1,4,5-trimethyl-

CAS # = 2131-41-1  
1st Dimension R.T. = 1037.25  
2nd Dimension R.T. = 0.997  
Quant Mass(es) = 170  
S/N = 241.88  
Area = 14745  
Height = 2303.8



(1,4,5-Trimethylnaphthalene)

Peak True - sample "Lipid BM 1 F1:1", peak 773, at 1037.25 , 0.997 sec , sec (Spec # 66401)

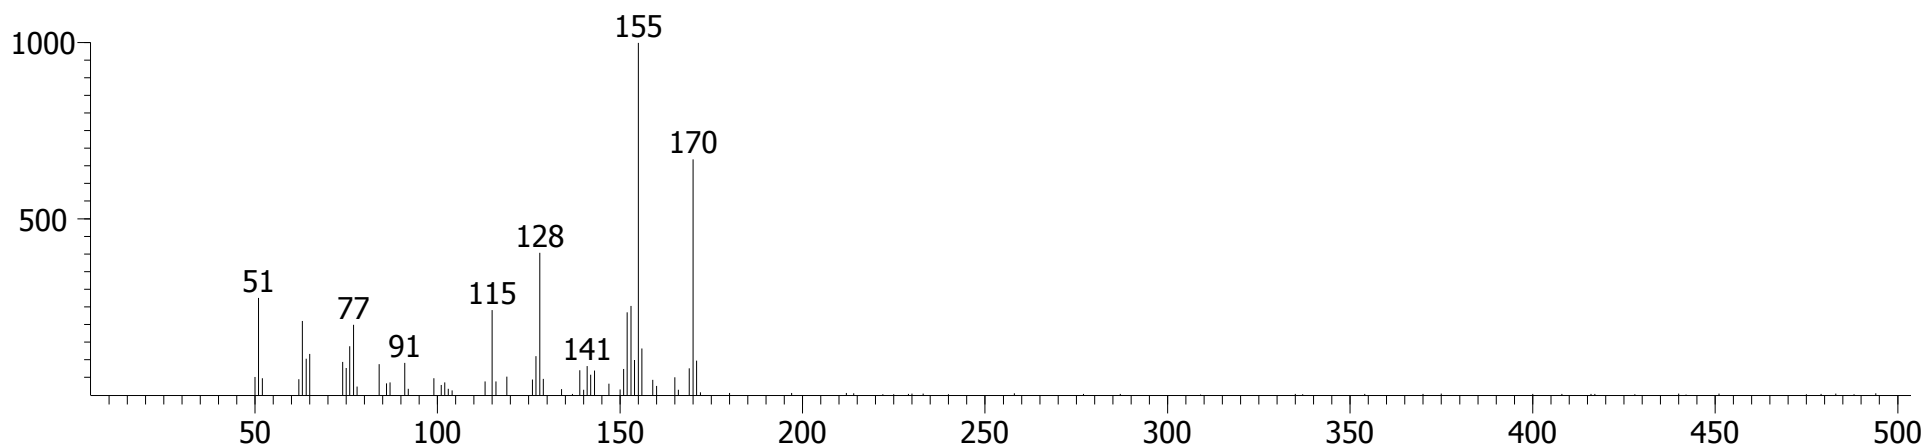

Library Hit - similarity 848, "Naphthalene, 1,4,5-trimethyl-"

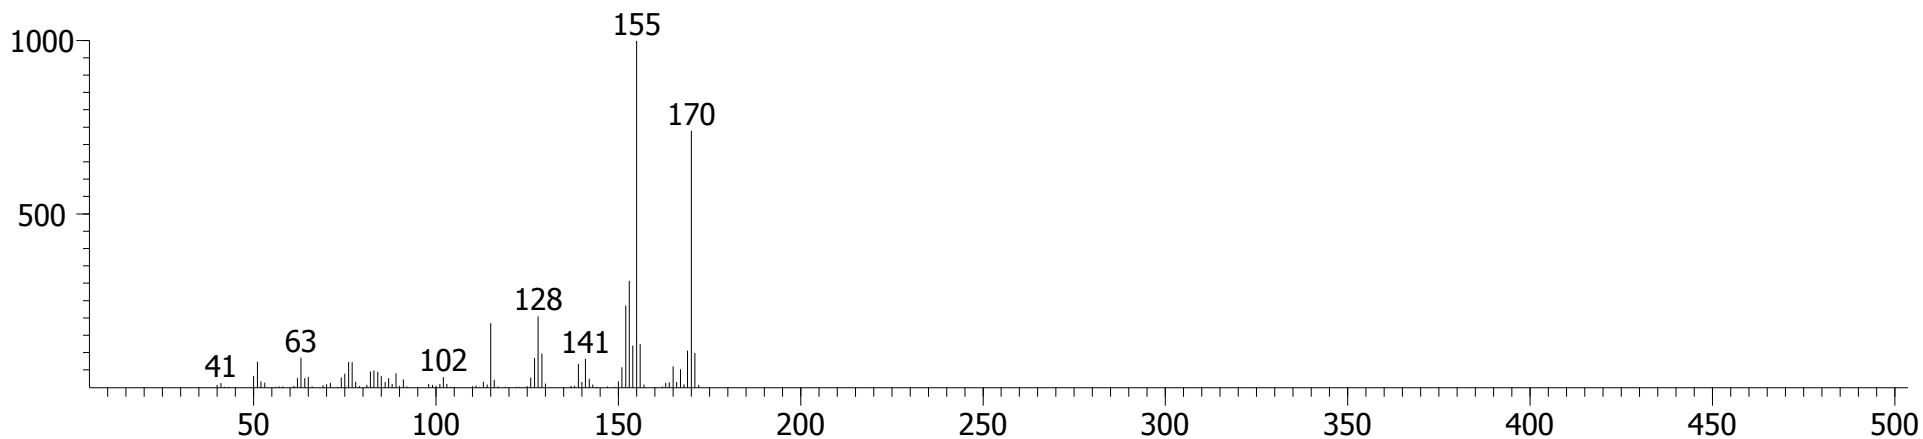

Sample 1, Fraction 1 (Hexane/DCM)

1,1'-Biphenyl, 3,4'-dimethyl-

CAS # = 7383-90-6  
1st Dimension R.T. = 1047.74  
2nd Dimension R.T. = 0.983  
Quant Mass(es) = 182  
S/N = 162.93  
Area = 10547  
Height = 1733.6

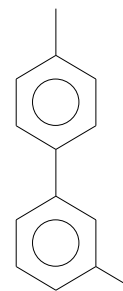

Peak True - sample "Lipid BM 1 F1:1", peak 795, at 1047.74 , 0.983 sec , sec (Spec # 67989)

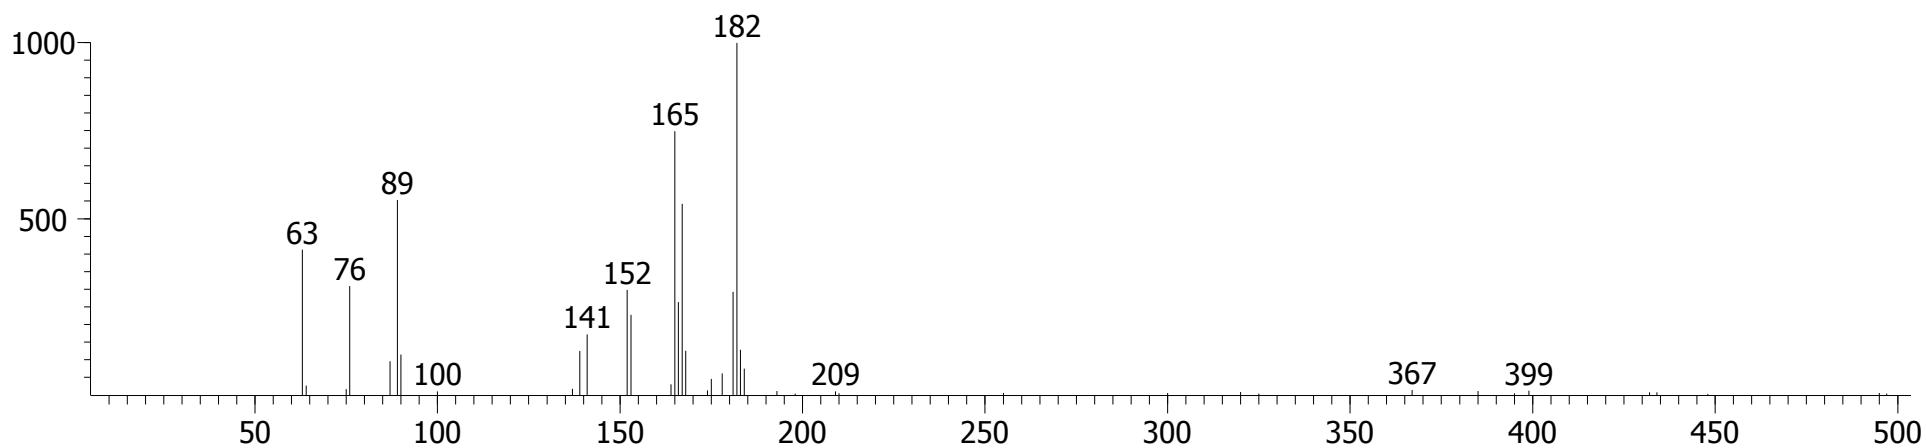

Library Hit - similarity 852, "1,1'-Biphenyl, 3,4'-dimethyl-"

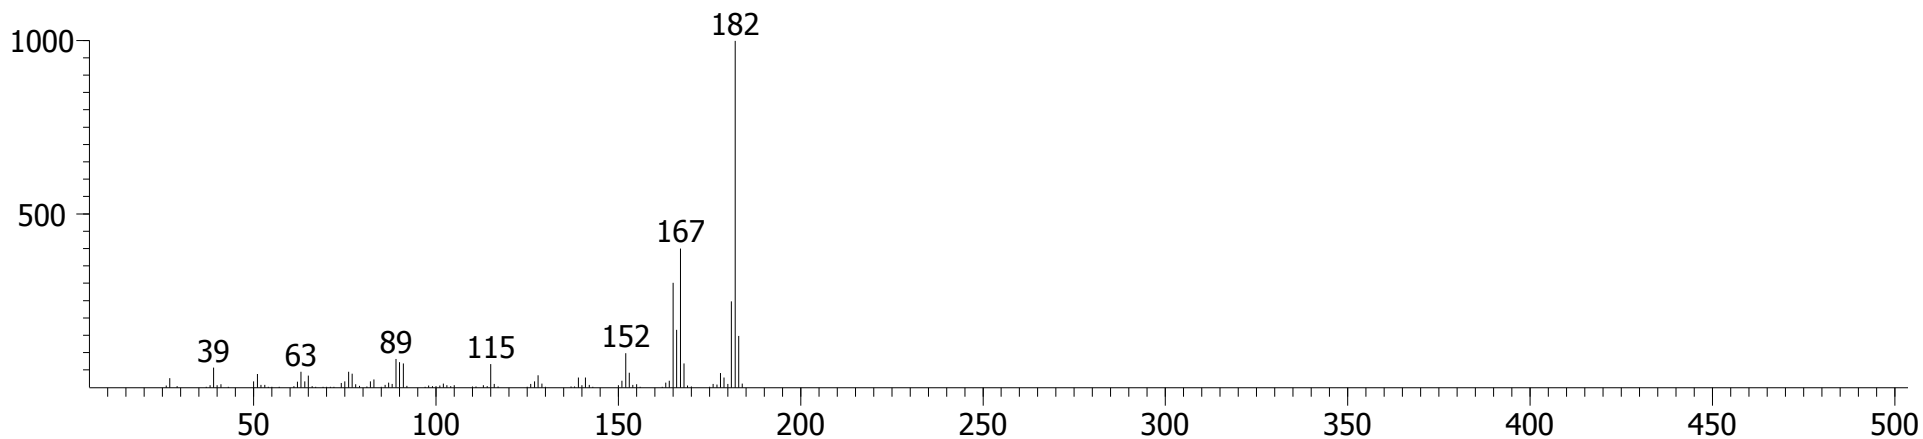



Sample 1, Fraction 1 (Hexane/DCM)

1,1'-Biphenyl, 4-methyl-

(4-Methylbiphenyl)

CAS # = 644-08-6  
1st Dimension R.T. = 1065.23  
2nd Dimension R.T. = 1.056  
Quant Mass(es) = 168  
S/N = 167.91  
Area = 14424  
Height = 1846.8



Peak True - sample "Lipid BM 1 F1:1", peak 822, at 1065.23 , 1.056 sec , sec (Spec # 70650)

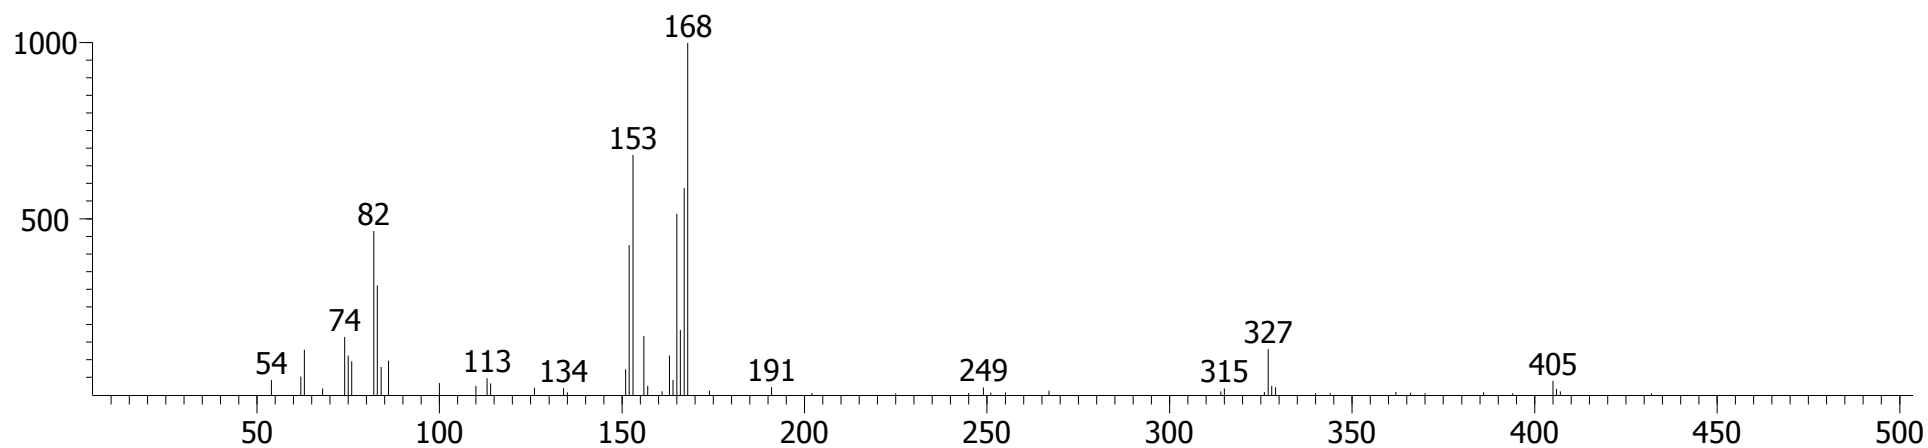

Library Hit - similarity 751, "1,1'-Biphenyl, 4-methyl-"

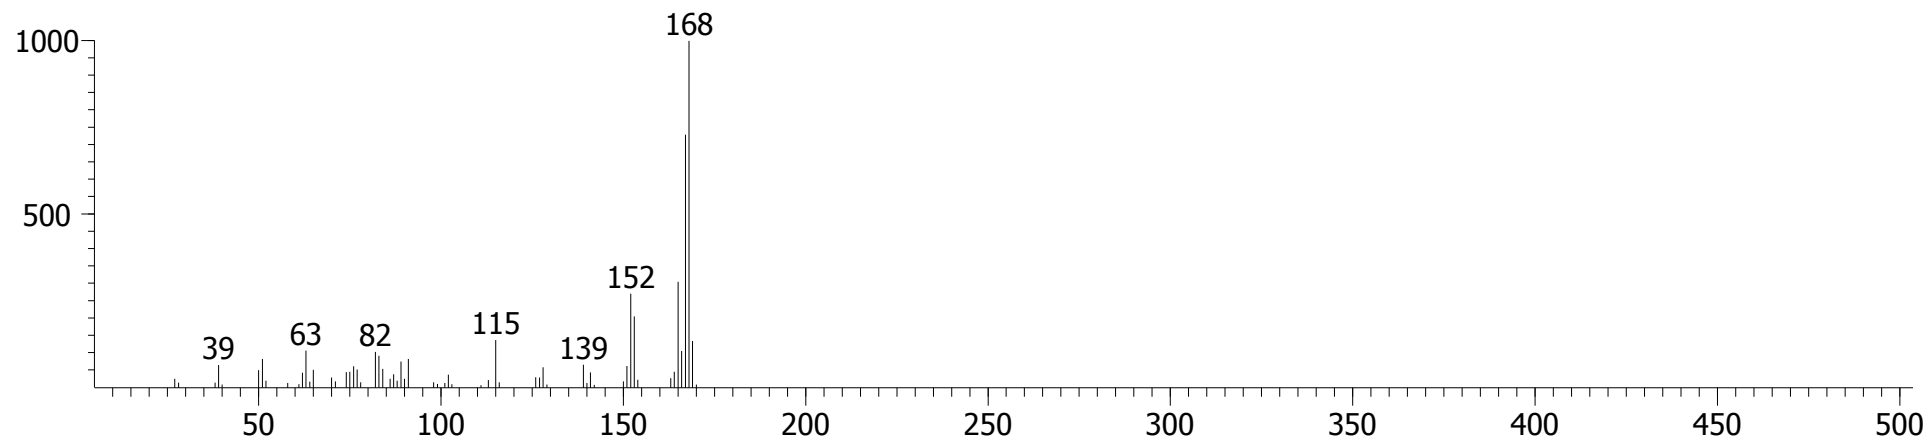

Sample 1, Fraction 1 (Hexane/DCM)

Benzothiazole, 2-(methylthio)-

CAS # = 615-22-5  
1st Dimension R.T. = 1068.73  
2nd Dimension R.T. = 1.102  
Quant Mass(es) = 181  
S/N = 66.828  
Area = 3089.6  
Height = 483.58

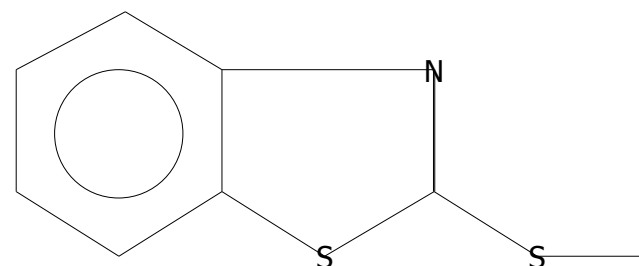

Peak True - sample "Lipid BM 1 F1:1", peak 831, at 1068.73 , 1.102 sec , sec (Spec # 71187)

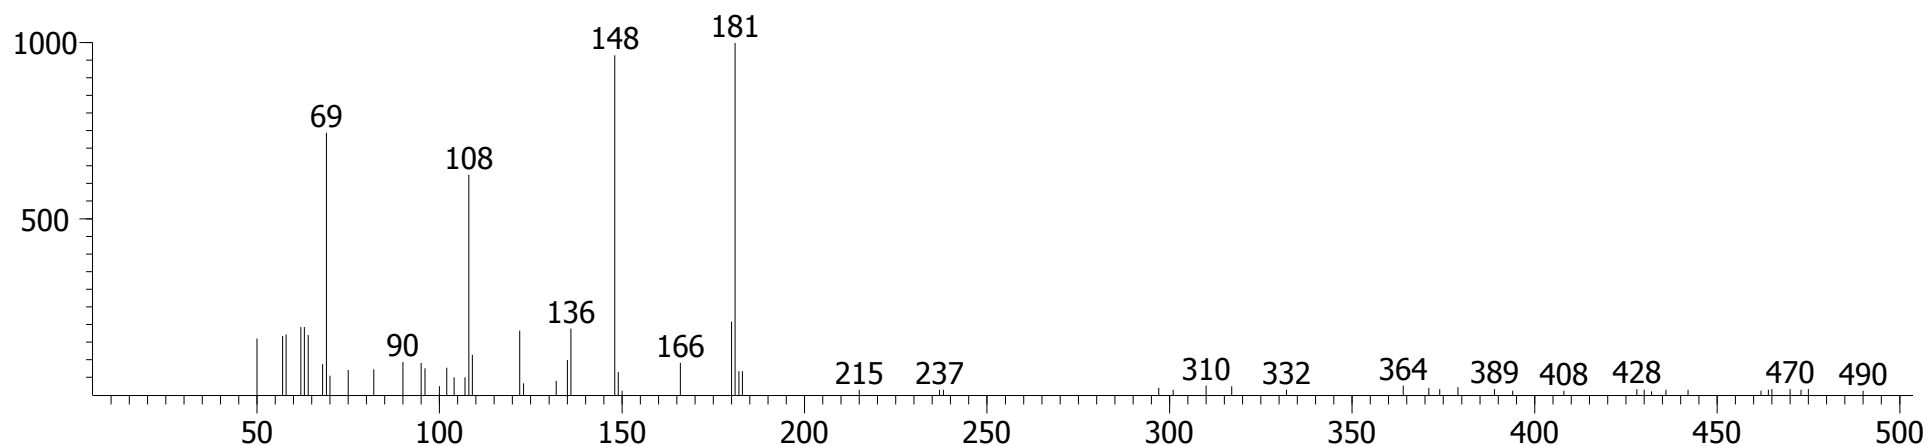

Library Hit - similarity 845, "Benzothiazole, 2-(methylthio)-"

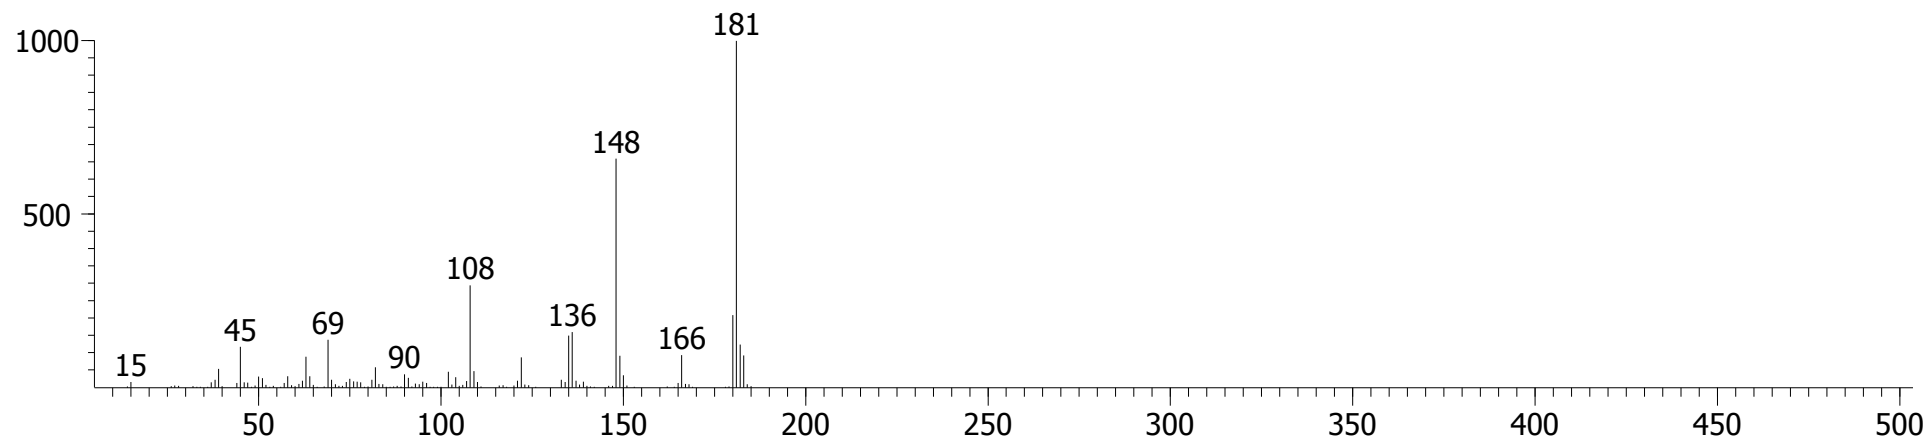

Sample 1, Fraction 1 (Hexane/DCM)

Benzene, 1,1'-[oxybis(methylene)]bis-

CAS # = 103-50-4  
1st Dimension R.T. = 1086.22  
2nd Dimension R.T. = 1.030  
Quant Mass(es) = 107  
S/N = 549.75  
Area = 11397  
Height = 1529.9

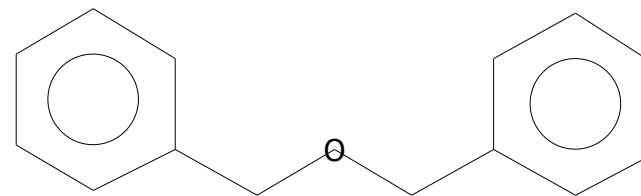

Peak True - sample "Lipid BM 1 F1:1", peak 872, at 1086.22 , 1.030 sec , sec (Spec # 73826)

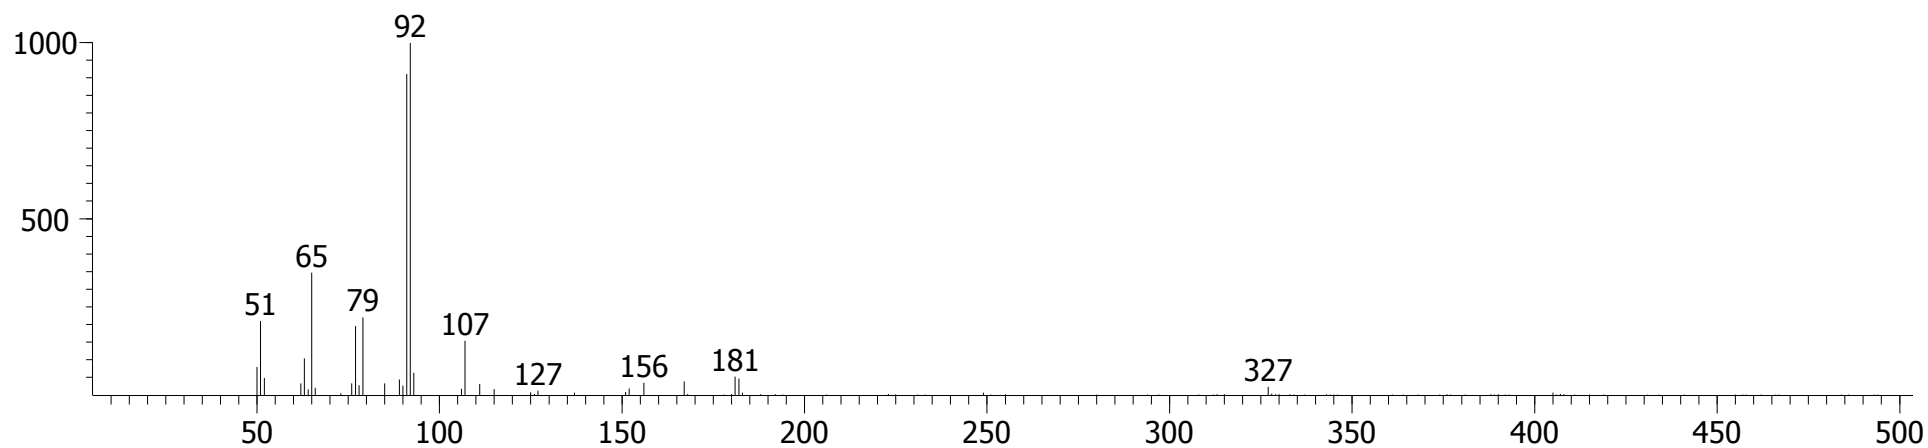

Library Hit - similarity 942, "Benzene, 1,1'-[oxybis(methylene)]bis-"

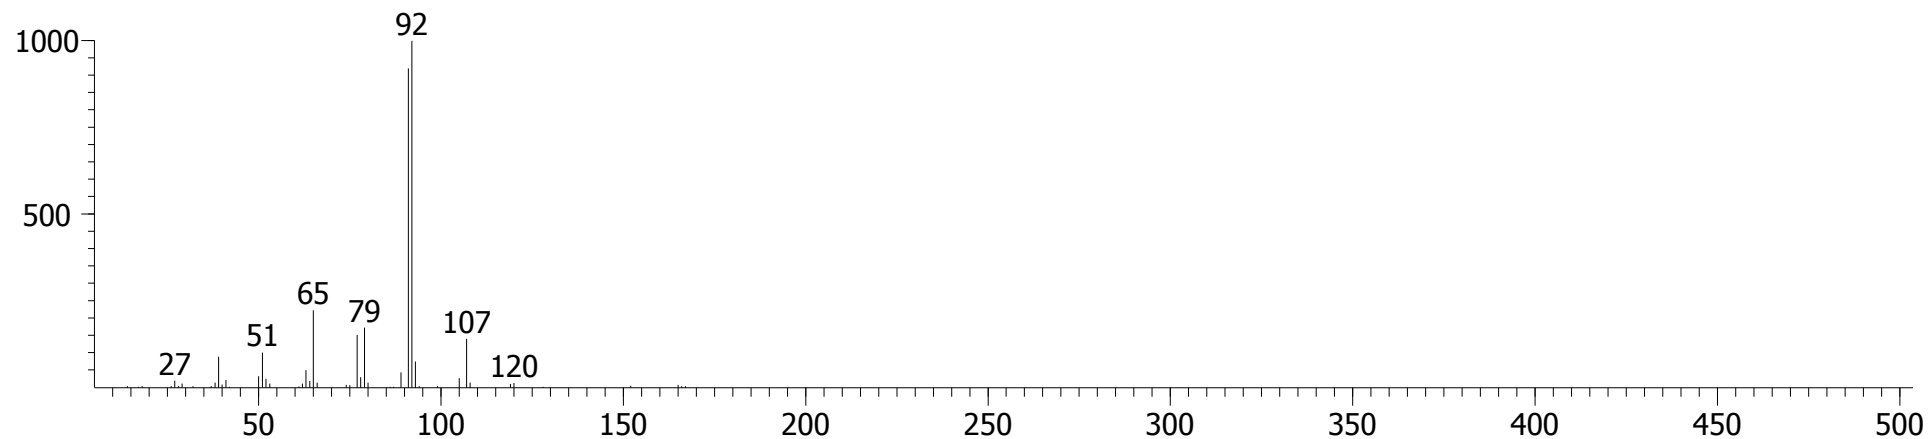

Sample 1, Fraction 1 (Hexane/DCM)

Benzeneacetic acid, à-oxo-, methyl ester

CAS # = 15206-55-0  
1st Dimension R.T. = 1093.22  
2nd Dimension R.T. = 1.049  
Quant Mass(es) = 105  
S/N = 763.52  
Area = 126933  
Height = 18875

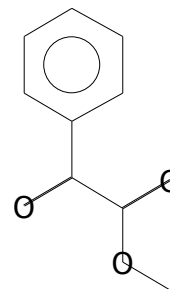

Peak True - sample "Lipid BM 1 F1:1", peak 892, at 1093.22 , 1.049 sec , sec (Spec # 74889)

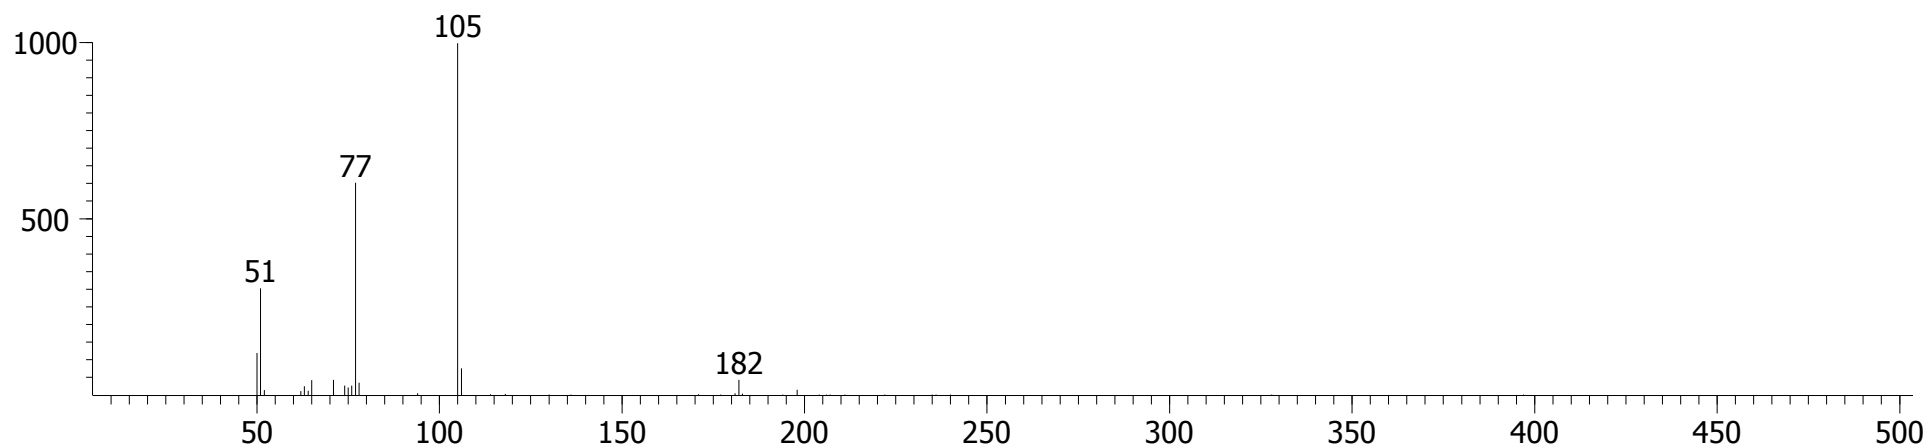

Library Hit - similarity 994, "Benzeneacetic acid, à-oxo-, methyl ester"

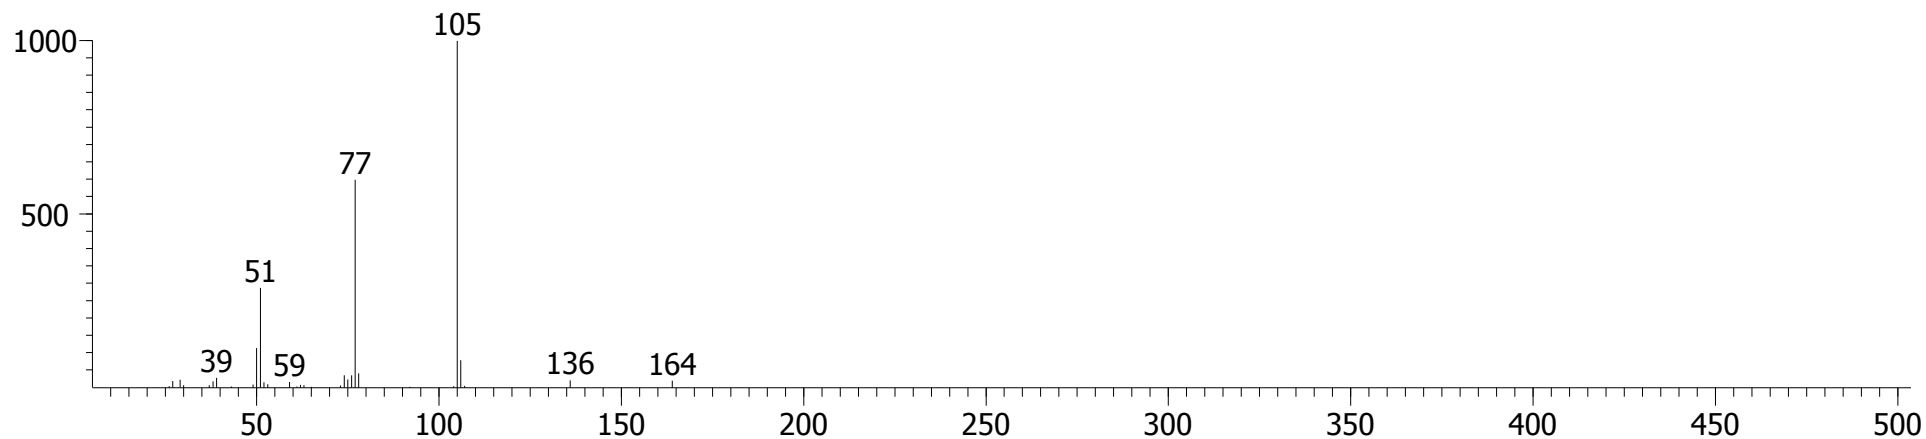

Sample 1, Fraction 1 (Hexane/DCM)

Benzene, hexachloro-

CAS # = 118-74-1  
1st Dimension R.T. = 1142.19  
2nd Dimension R.T. = 1.016  
Quant Mass(es) = 284  
S/N = 786.37  
Area = 31012  
Height = 5159.9

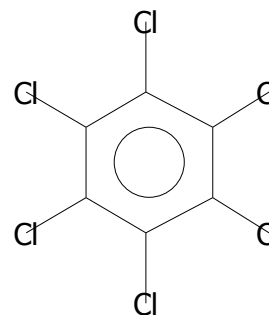

(HCB)

Peak True - sample "Lipid BM 1 F1:1", peak 1000, at 1142.19 , 1.016 sec , sec (Spec # 82304)

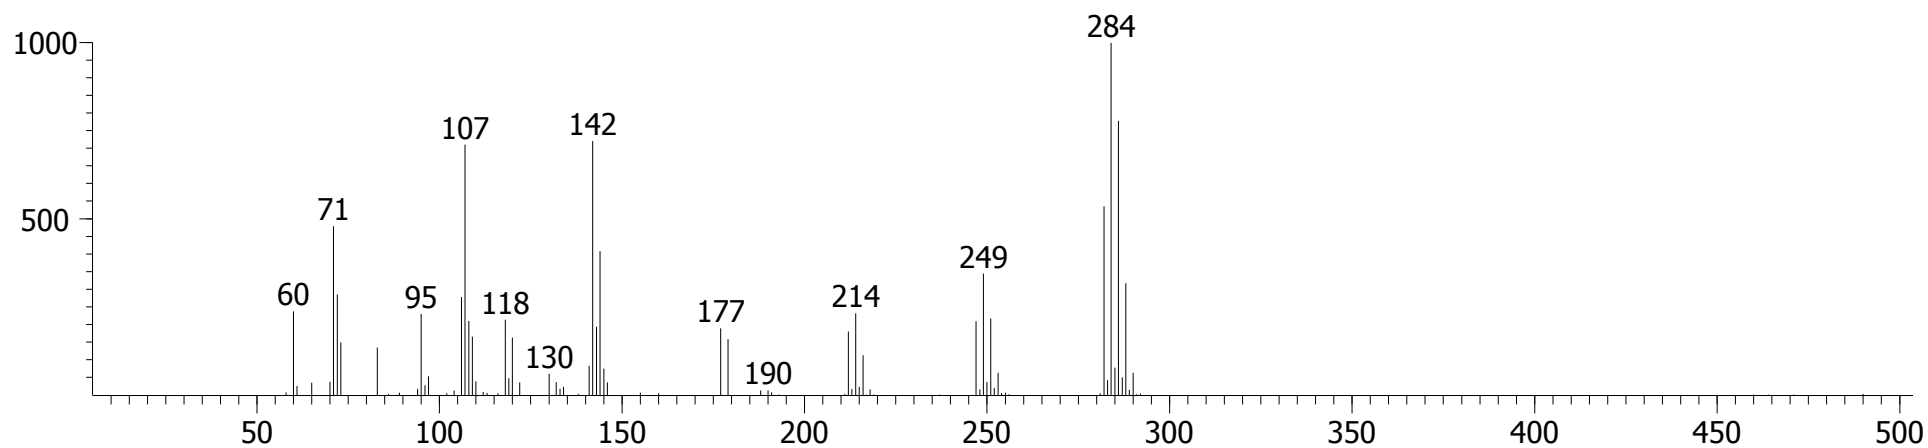

Library Hit - similarity 940, "Benzene, hexachloro-"

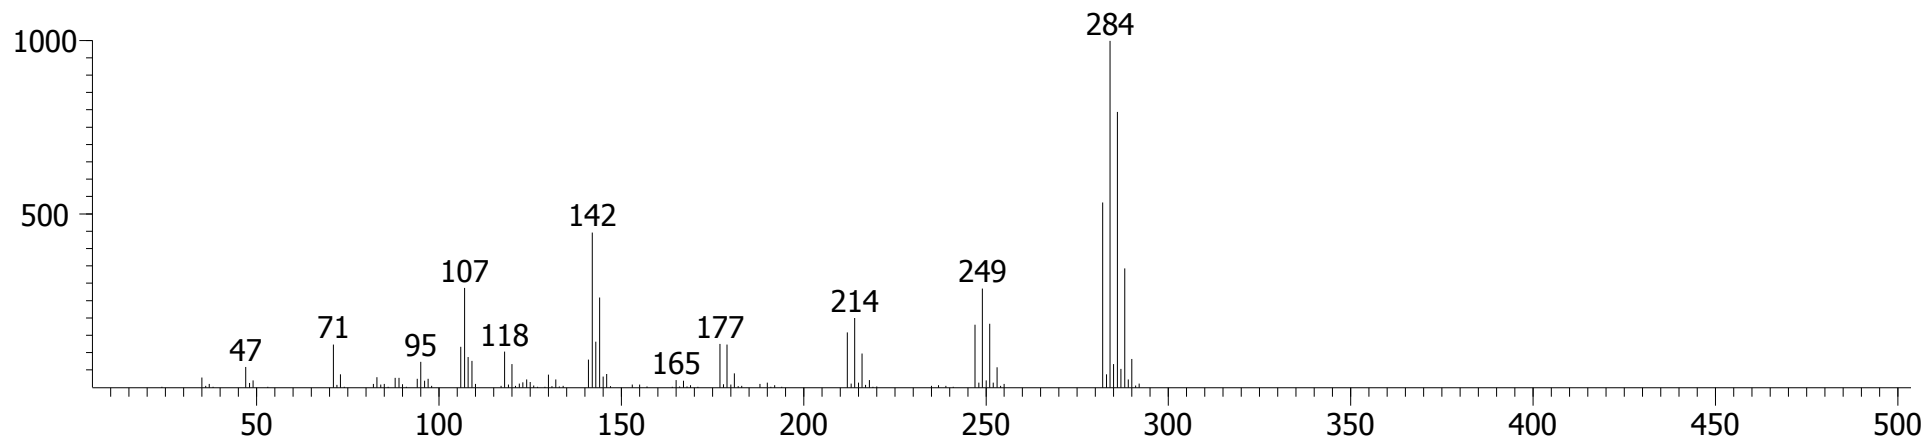

Sample 1, Fraction 1 (Hexane/DCM)

1H-Phenalen-1-one

CAS # = 548-39-0  
1st Dimension R.T. = 1159.68  
2nd Dimension R.T. = 1.129  
Quant Mass(es) = 180  
S/N = 179.59  
Area = 10405  
Height = 1546.7

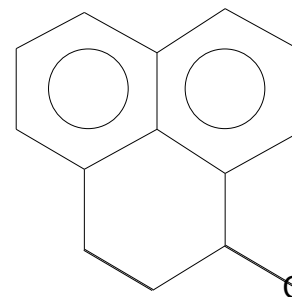

Peak True - sample "Lipid BM 1 F1:1", peak 1043, at 1159.68 , 1.129 sec , sec (Spec # 84971)

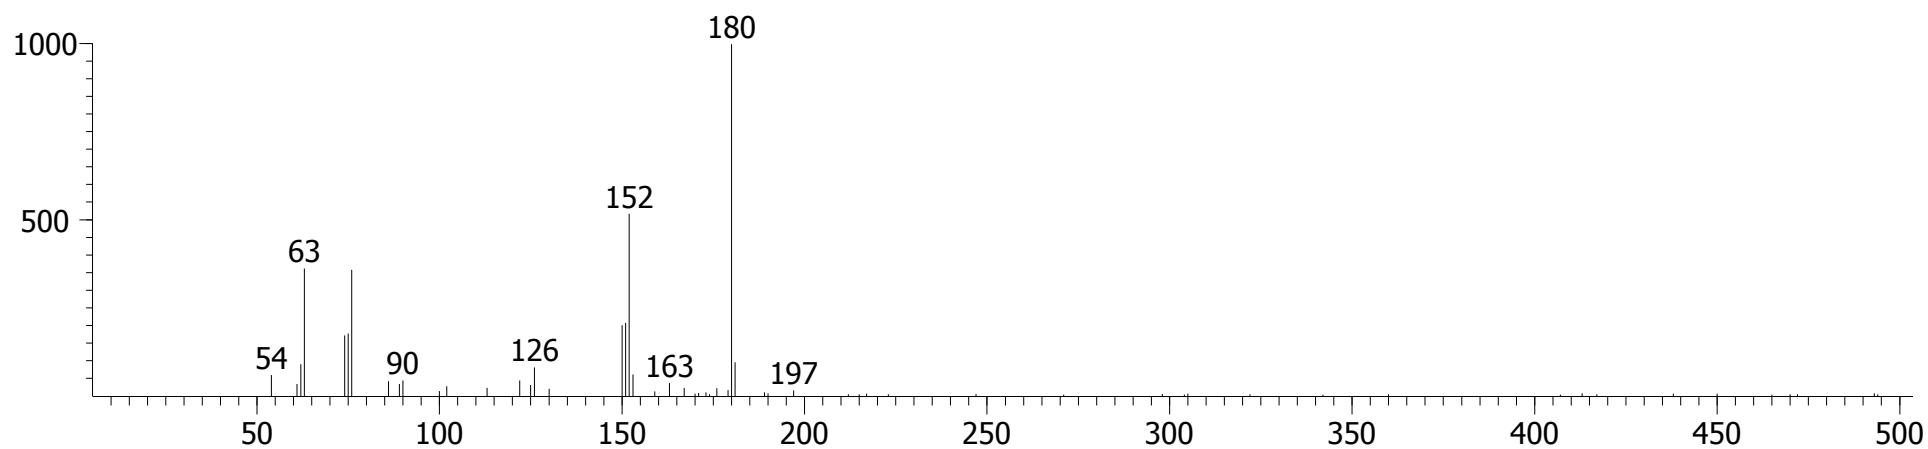

Library Hit - similarity 904, "1H-Phenalen-1-one"

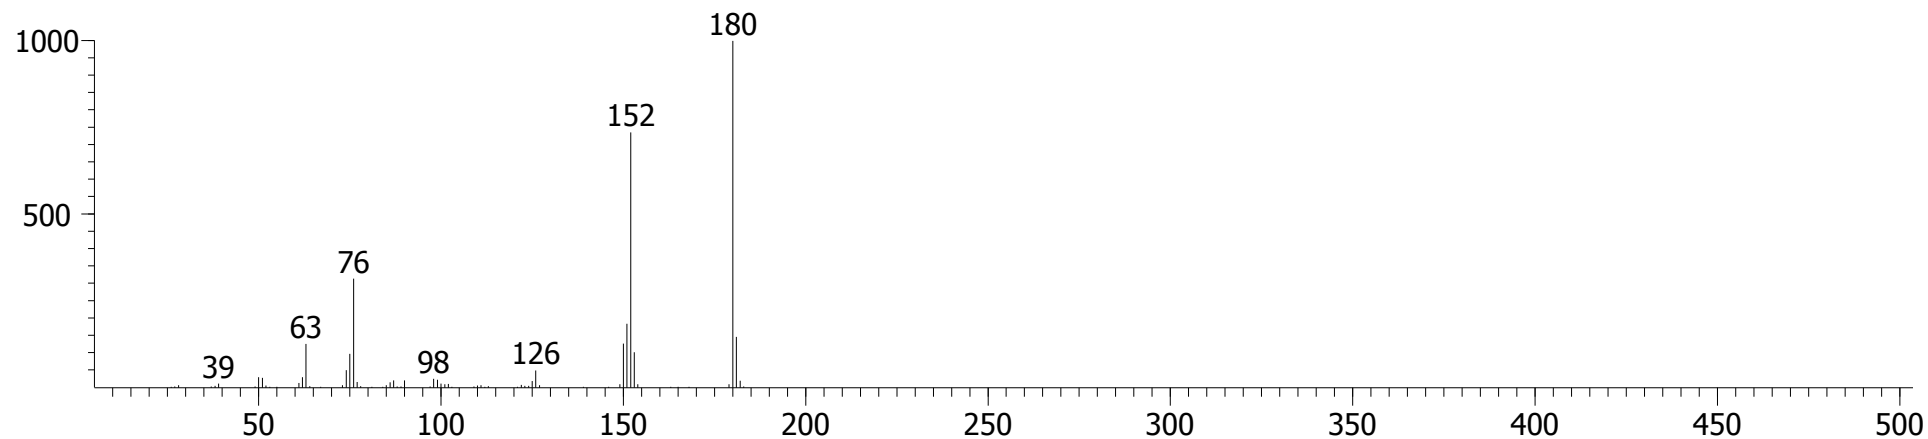

Sample 1, Fraction 1 (Hexane/DCM)

beta-HCH

CAS # = 319-84-6  
1st Dimension R.T. = 1163.18  
2nd Dimension R.T. = 1.102  
Quant Mass(es) = 219  
S/N = 934.76  
Area = 52158  
Height = 7323.3

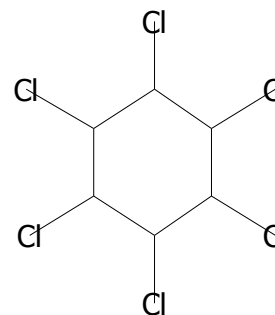

Peak True - sample "Lipid BM 1 F1:1", peak 1051, at 1163.18 , 1.102 sec , sec (Spec # 85497)

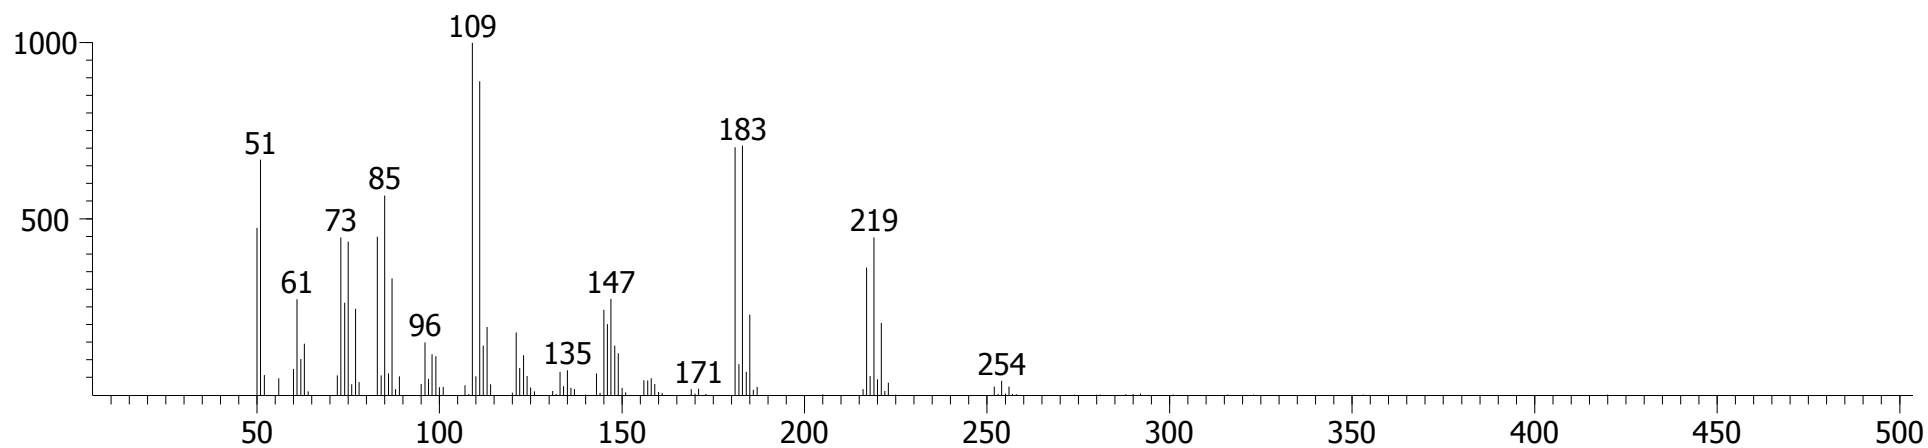

Library Hit - similarity 896, "à-Lindane"

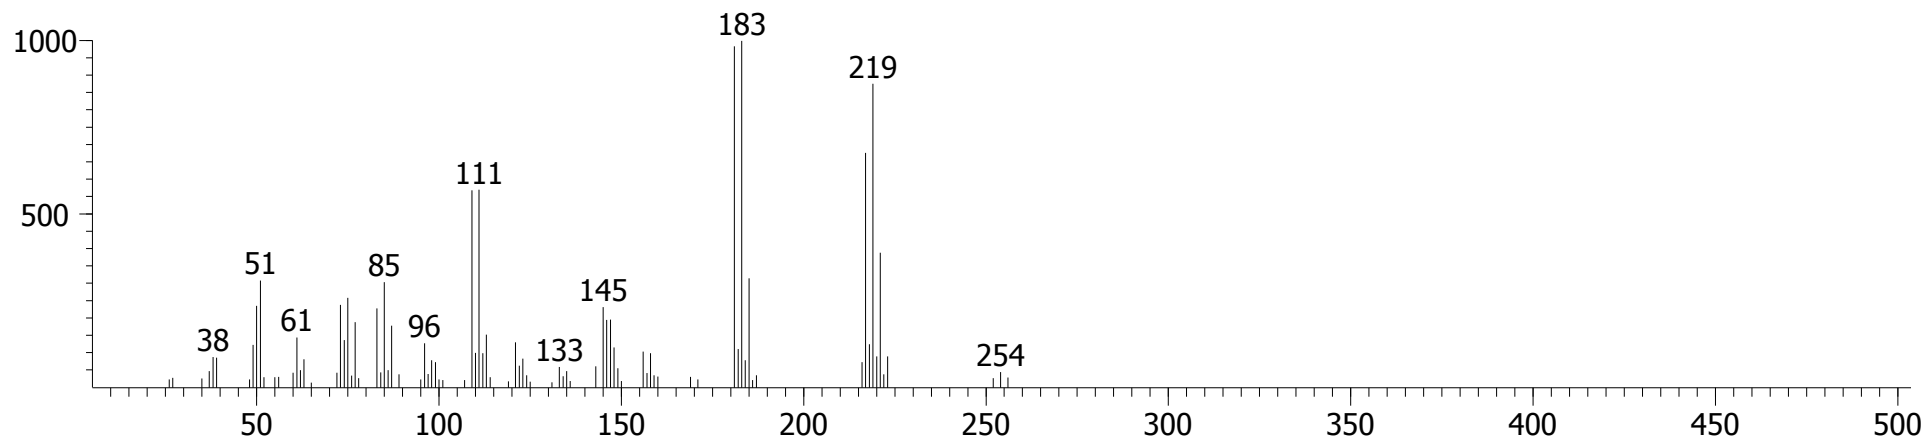

Sample 1, Fraction 1 (Hexane/DCM)

Benzene,

1,1'-[1,2-ethanediylbis(oxy)]bis-

CAS # = 104-66-5

1st Dimension R.T. = 1180.67

2nd Dimension R.T. = 1.056

Quant Mass(es) = 214

S/N = 76.031

Area = 2220.9

Height = 297.52

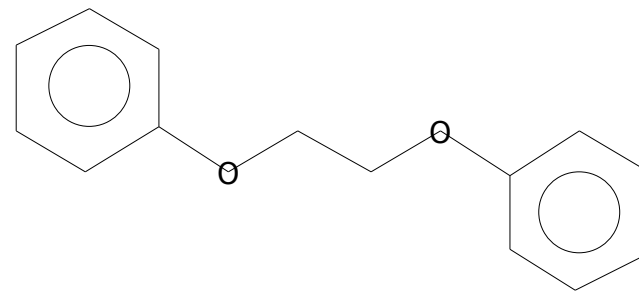

Peak True - sample "Lipid BM 1 F1:1", peak 1091, at 1180.67 , 1.056 sec , sec (Spec # 88140)

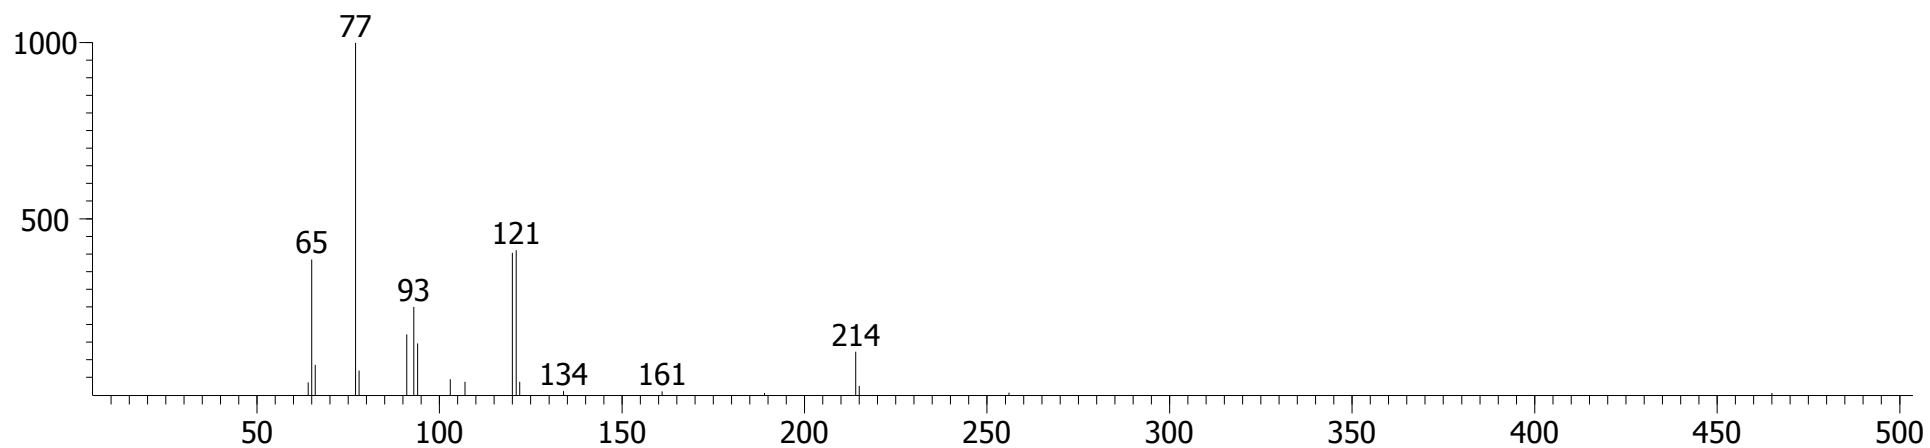

Library Hit - similarity 821, "Benzene, 1,1'-[1,2-ethanediylbis(oxy)]bis-"

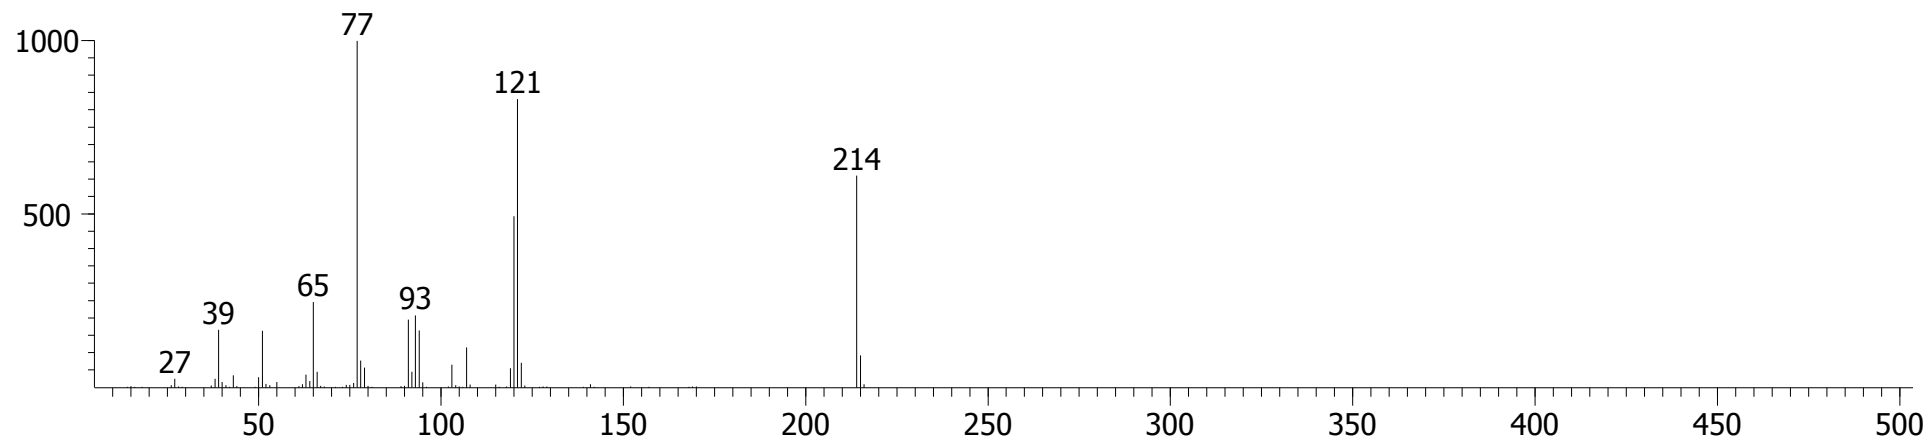



Sample 1, Fraction 1 (Hexane/DCM)

3,5-di-tert-Butyl-4-hydroxyacetophenone

CAS # = 14035-33-7  
1st Dimension R.T. = 1187.66  
2nd Dimension R.T. = 0.990  
Quant Mass(es) = 248  
S/N = 1072.9  
Area = 6423.9  
Height = 1140.4

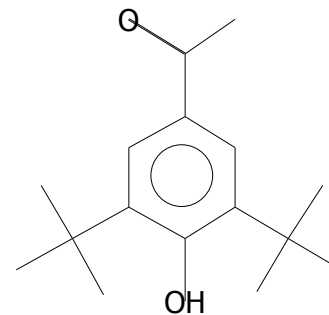

Peak True - sample "Lipid BM 1 F1:1", peak 1099, at 1187.66 , 0.990 sec , sec (Spec # 89190)

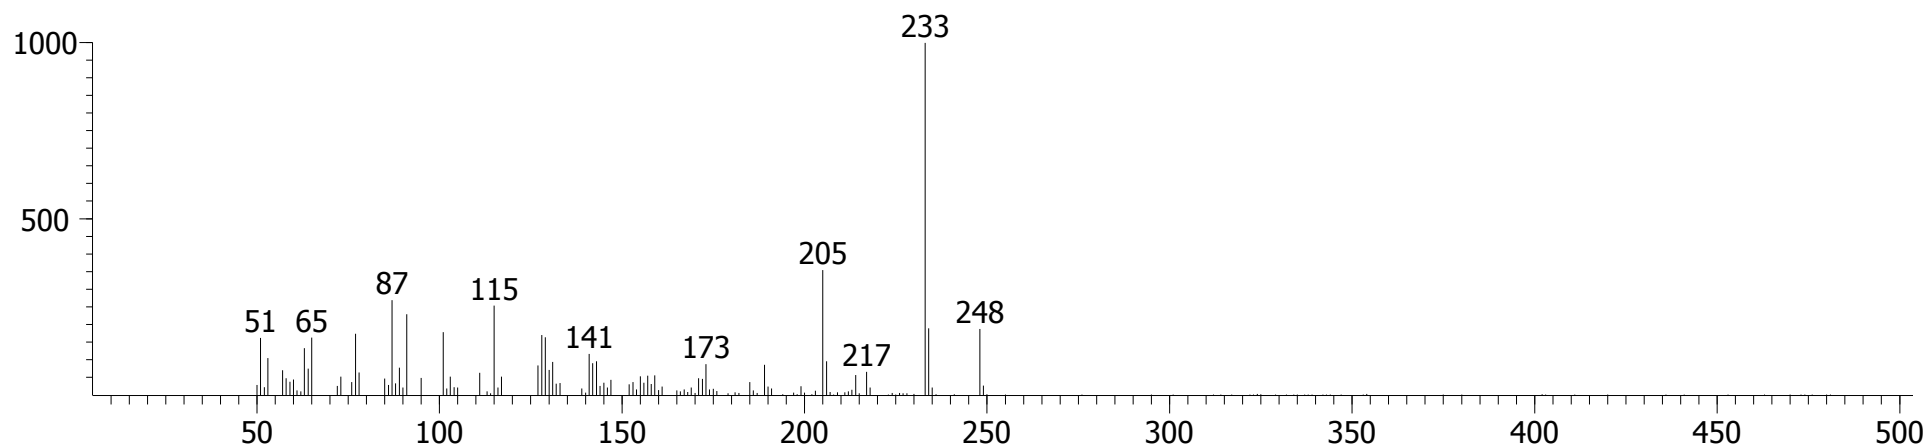

Library Hit - similarity 738, "3,5-di-tert-Butyl-4-hydroxyacetophenone"

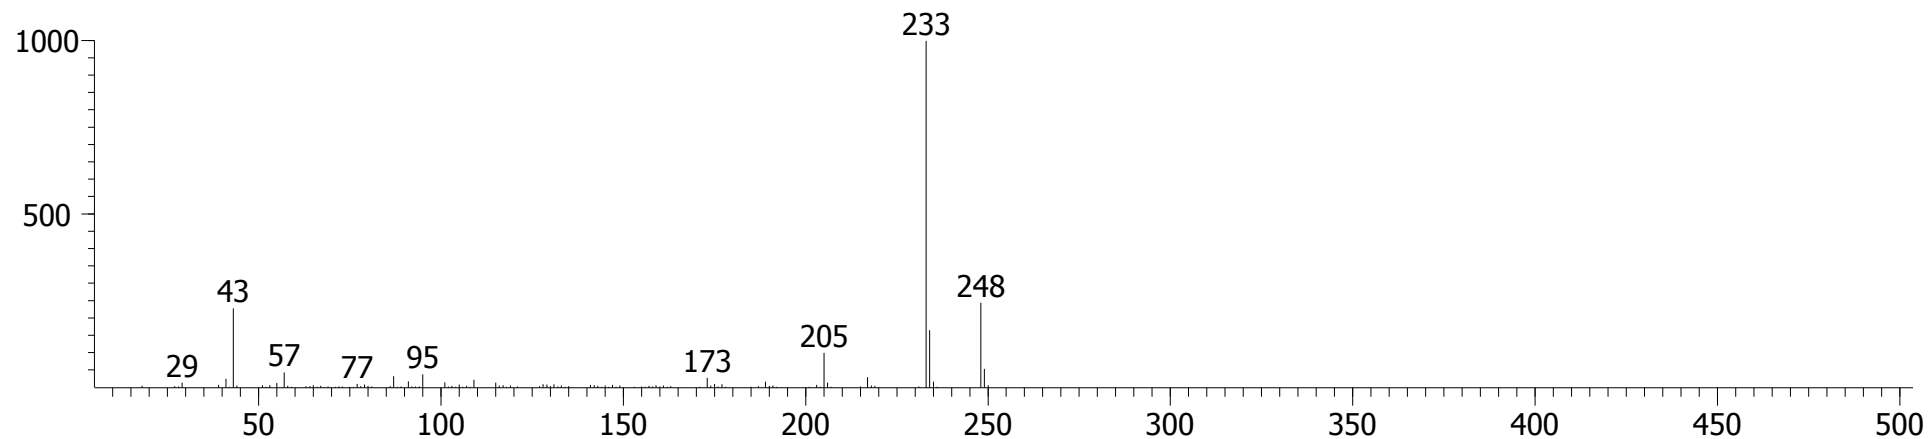

Sample 1, Fraction 1 (Hexane/DCM)

Phenanthrene

CAS # = 85-01-8  
1st Dimension R.T. = 1187.66  
2nd Dimension R.T. = 1.129  
Quant Mass(es) = 178  
S/N = 584.22  
Area = 46094  
Height = 6164.0

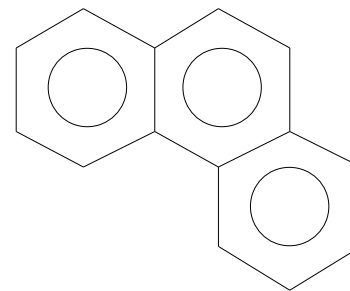

Peak True - sample "Lipid BM 1 F1:1", peak 1101, at 1187.66 , 1.129 sec , sec (Spec # 89211)

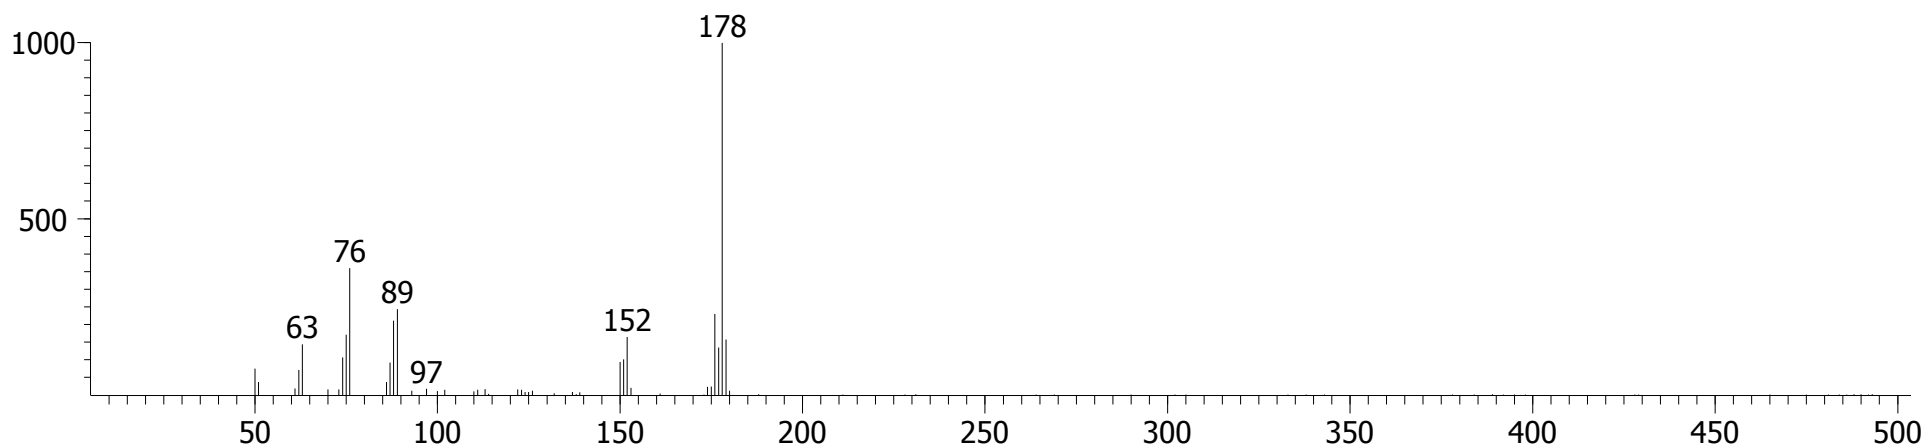

Library Hit - similarity 955, "Phenanthrene"

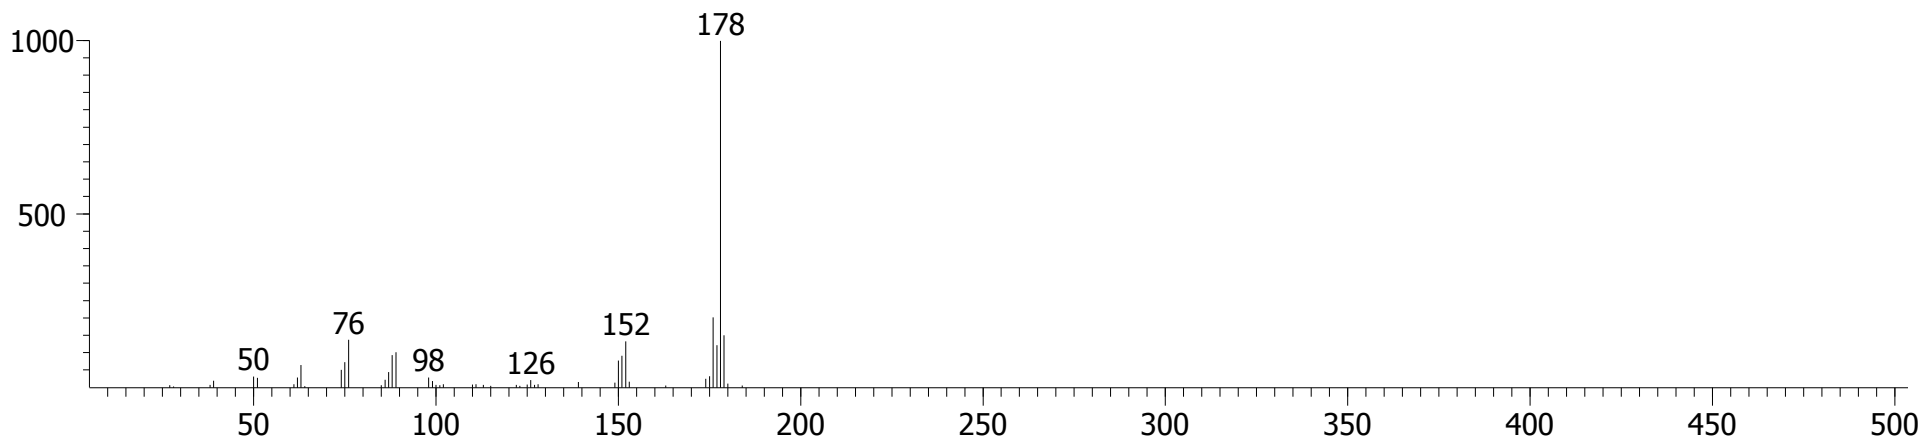

Sample 1, Fraction 1 (Hexane/DCM)

9H-Fluorene, 9,9-dimethyl-

CAS # = 4569-45-3  
1st Dimension R.T. = 1205.15  
2nd Dimension R.T. = 1.056  
Quant Mass(es) = 194  
S/N = 93.650  
Area = 5507.2  
Height = 727.59

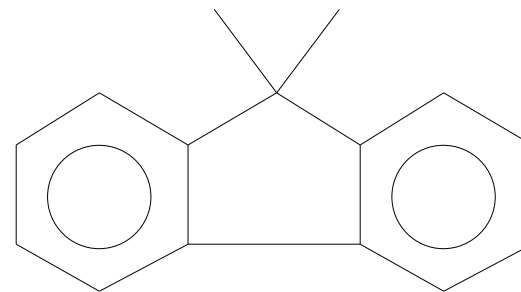

Peak True - sample "Lipid BM 1 F1:1", peak 1135, at 1205.15 , 1.056 sec , sec (Spec # 91850)

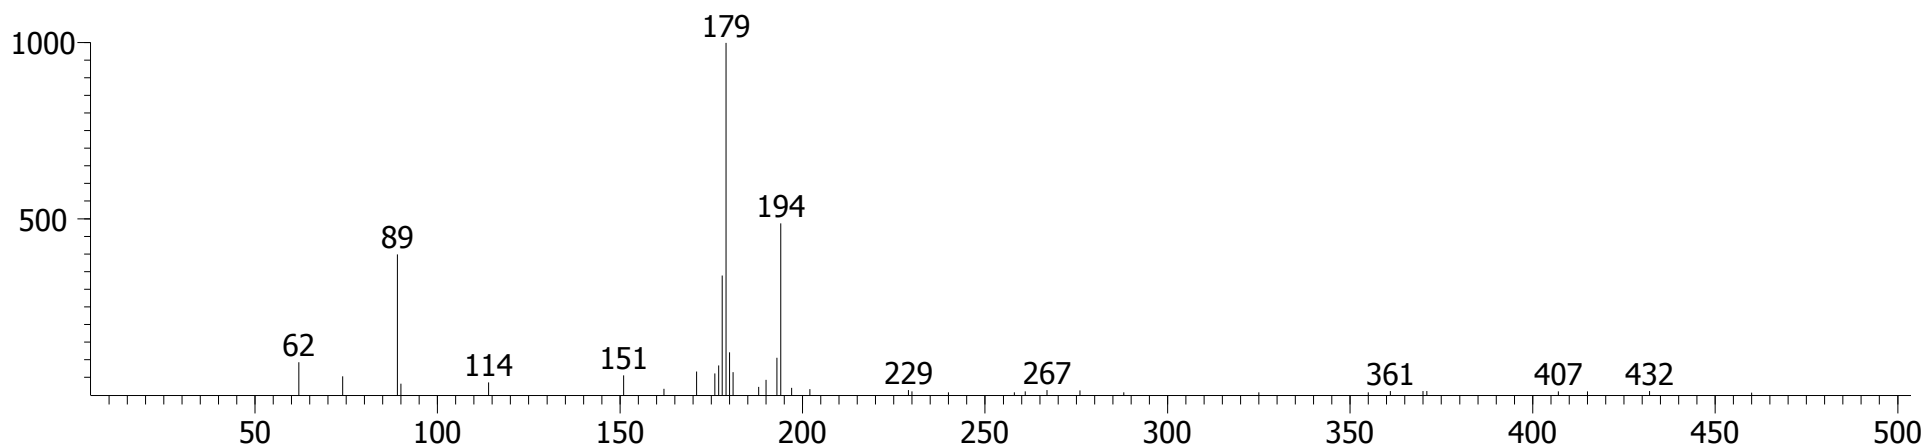

Library Hit - similarity 774, "9H-Fluorene, 9,9-dimethyl-"

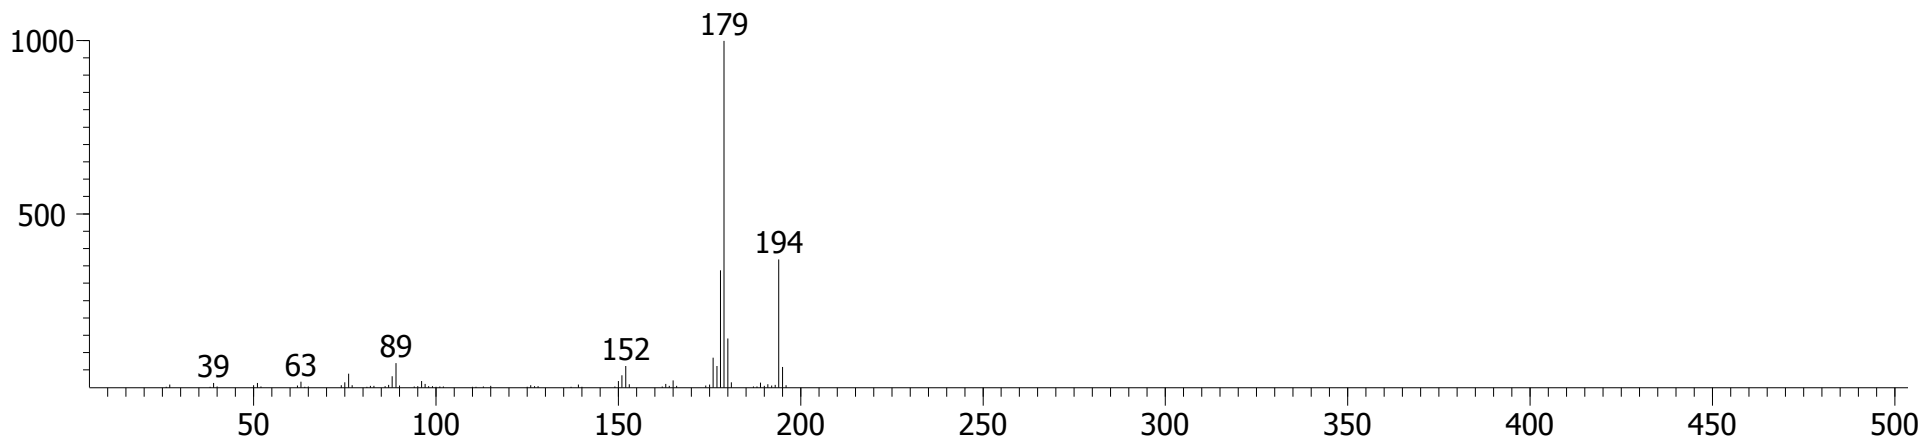

Sample 1, Fraction 1 (Hexane/DCM)

Benzene, (trimethoxymethyl)-

CAS # = 707-07-3  
1st Dimension R.T. = 1233.14  
2nd Dimension R.T. = 1.102  
Quant Mass(es) = 151  
S/N = 260.73  
Area = 13463  
Height = 2374.8

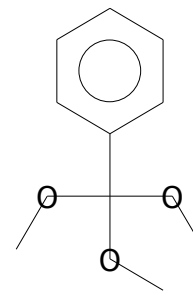

Peak True - sample "Lipid BM 1 F1:1", peak 1191, at 1233.14 , 1.102 sec , sec (Spec # 96097)

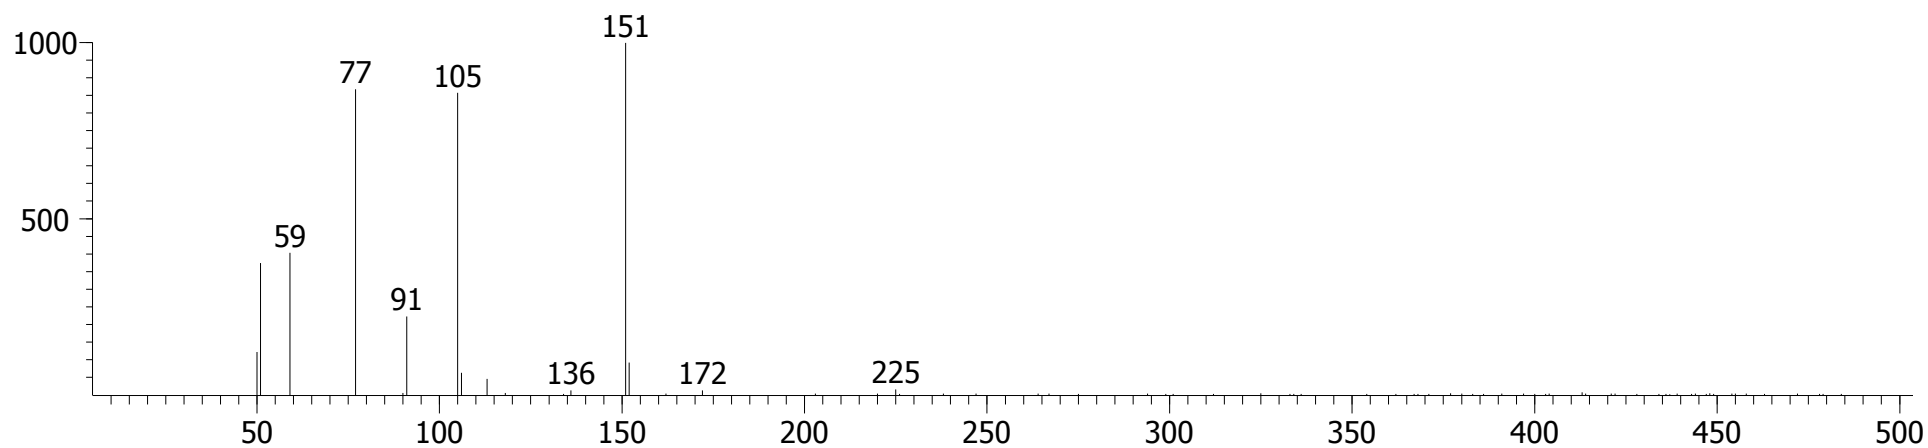

Library Hit - similarity 919, "Benzene, (trimethoxymethyl)-"

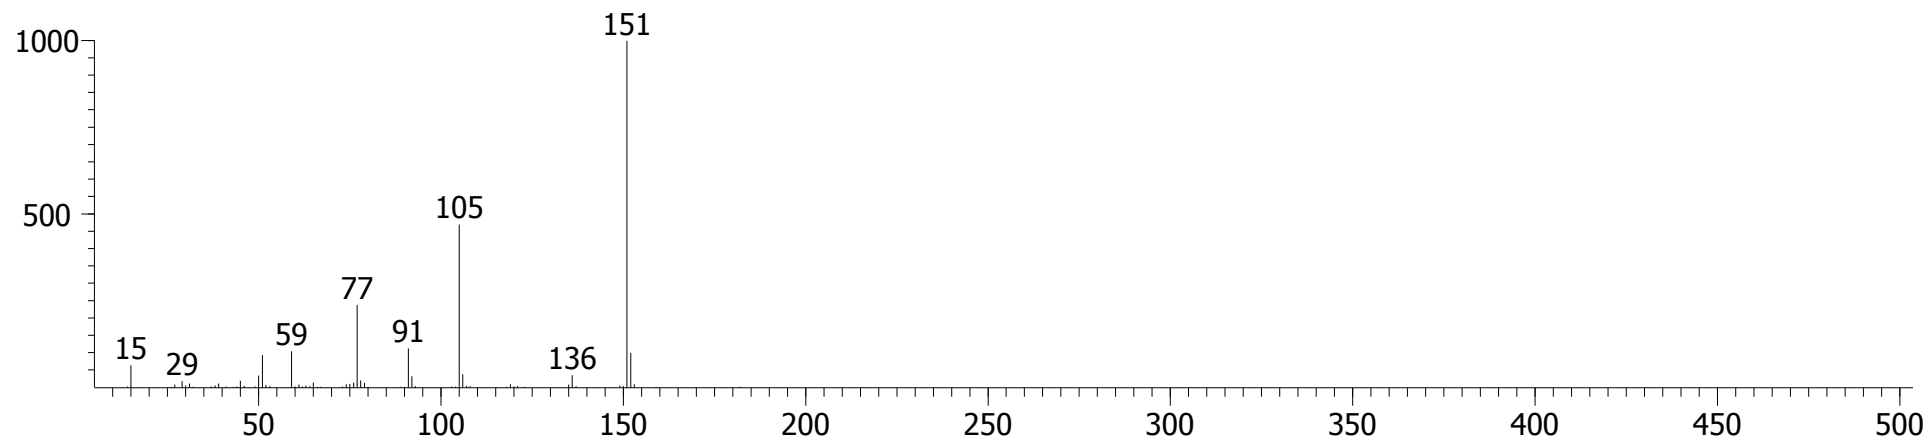

# Sample 1, Fraction 1 (Hexane/DCM)

## Benzenepropanoic acid, 3,5-bis(1,1-dimethylethyl)-4-hydroxy-,

CAS # = 6386-38-5

1st Dimension R.T. = 1254.13

2nd Dimension R.T. = 0.990

Quant Mass(es) = 292

S/N = 1001.2

Area = 11645

Height = 2088.6

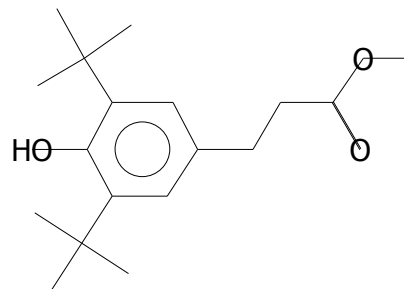

Peak True - sample "Lipid BM 1 F1:1", peak 1228, at 1254.13 , 0.990 sec , sec (Spec # 99260)

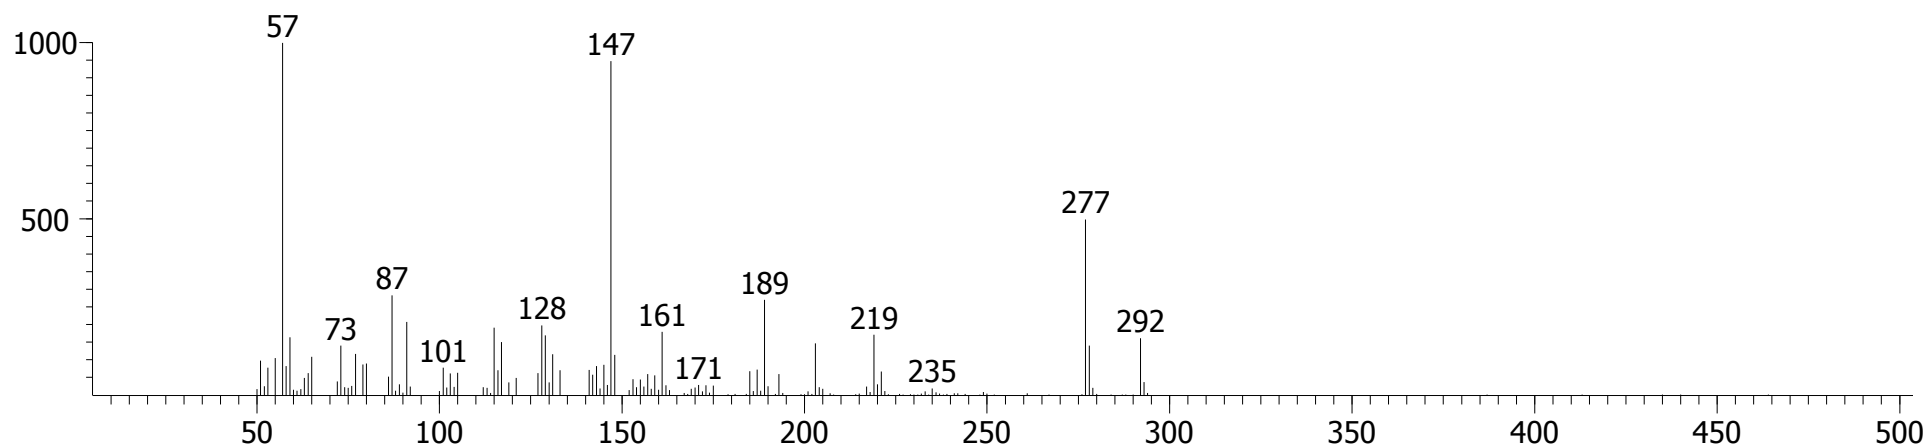

Library Hit - similarity 811, "Benzenepropanoic acid, 3,5-bis(1,1-dimethylethyl)-4-hydroxy-, methyl ester"

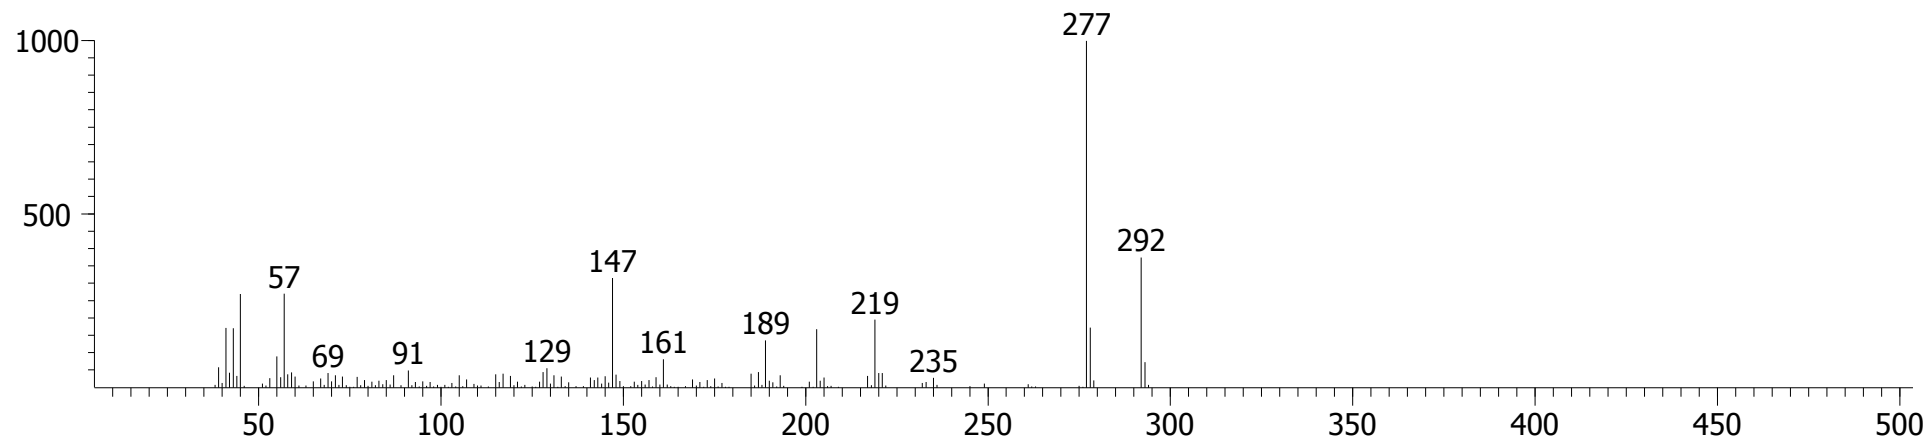

Sample 1, Fraction 1 (Hexane/DCM)

Peroxide, 1,1-dimethylethyl  
1-methyl-1-phenylethyl

CAS # = 3457-61-2  
1st Dimension R.T. = 1254.13  
2nd Dimension R.T. = 1.089  
Quant Mass(es) = 120  
S/N = 173.37  
Area = 11936  
Height = 2104.6

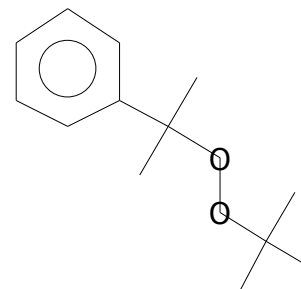

Peak True - sample "Lipid BM 1 F1:1", peak 1229, at 1254.13 , 1.089 sec , sec (Spec # 99275)

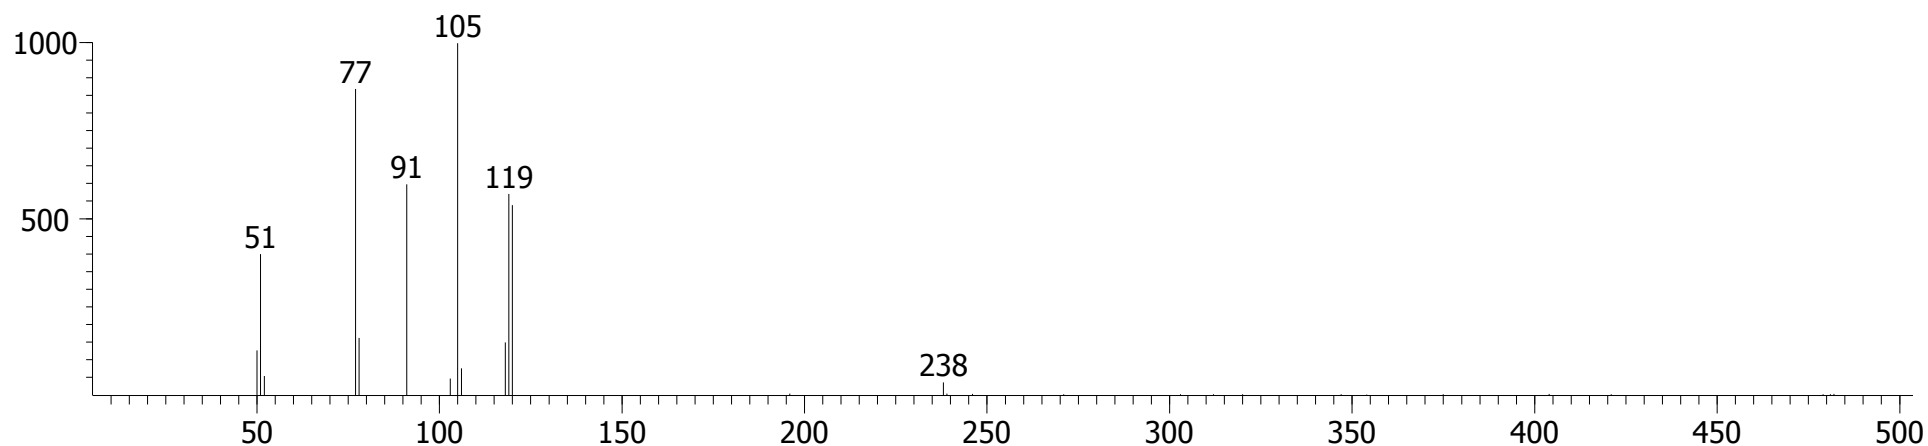

Library Hit - similarity 852, "Peroxide, 1,1-dimethylethyl 1-methyl-1-phenylethyl"

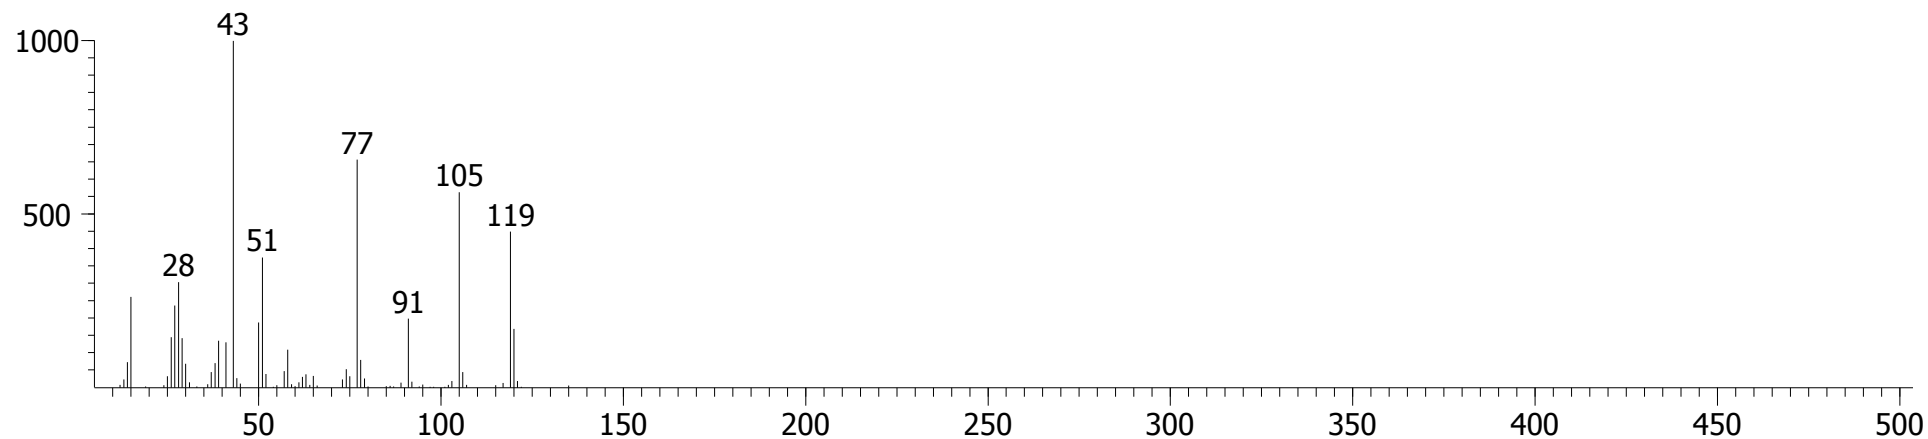

Sample 1, Fraction 1 (Hexane/DCM)

5H-Dibenzo[a,d]cycloheptene

CAS # = 256-81-5  
1st Dimension R.T. = 1254.13  
2nd Dimension R.T. = 1.122  
Quant Mass(es) = 192  
S/N = 89.777  
Area = 5437.8  
Height = 817.27

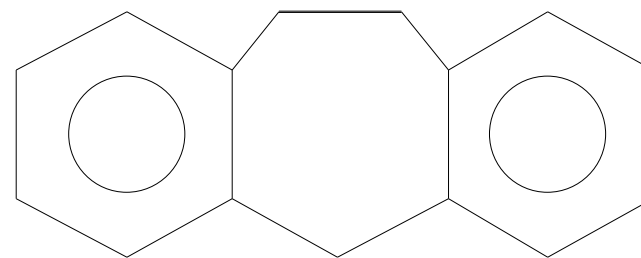

Peak True - sample "Lipid BM 1 F1:1", peak 1230, at 1254.13 , 1.122 sec , sec (Spec # 99280)

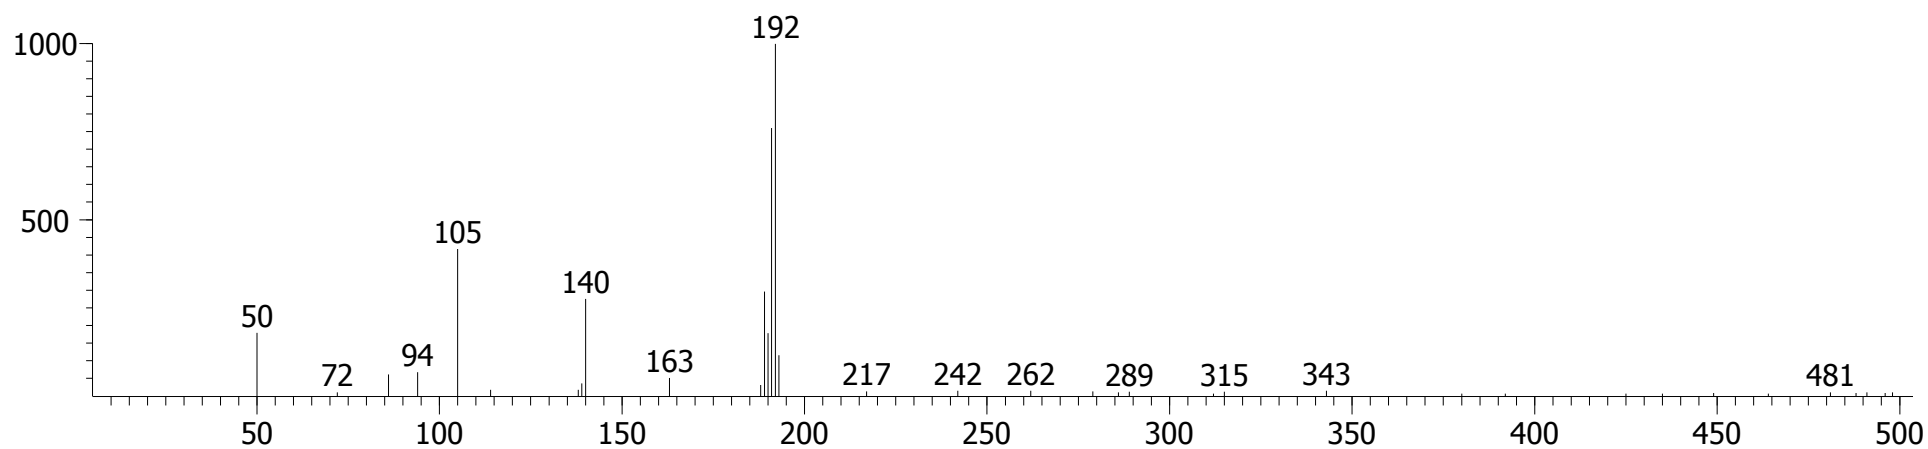

Library Hit - similarity 789, "5H-Dibenzo[a,d]cycloheptene"

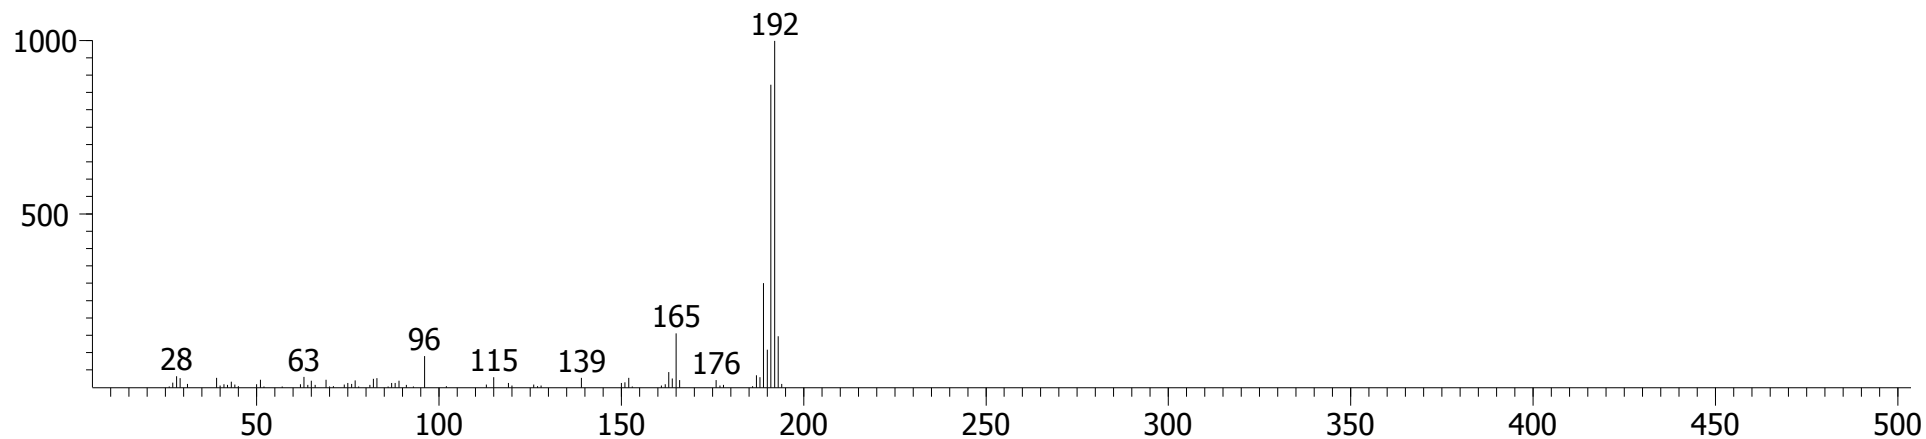

Sample 1, Fraction 1 (Hexane/DCM)

5H-Dibenzo[a,d]cycloheptene

CAS # = 256-81-5  
1st Dimension R.T. = 1271.62  
2nd Dimension R.T. = 1.148  
Quant Mass(es) = 192  
S/N = 164.50  
Area = 17514  
Height = 2443.5

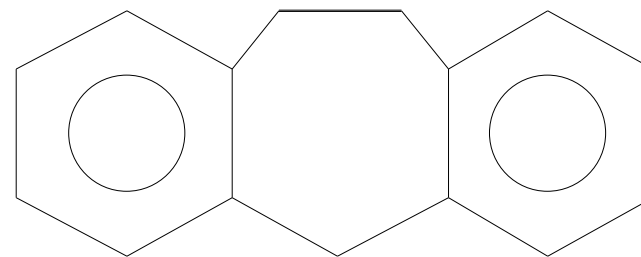

Peak True - sample "Lipid BM 1 F1:1", peak 1276, at 1271.62 , 1.148 sec , sec (Spec # 101934)

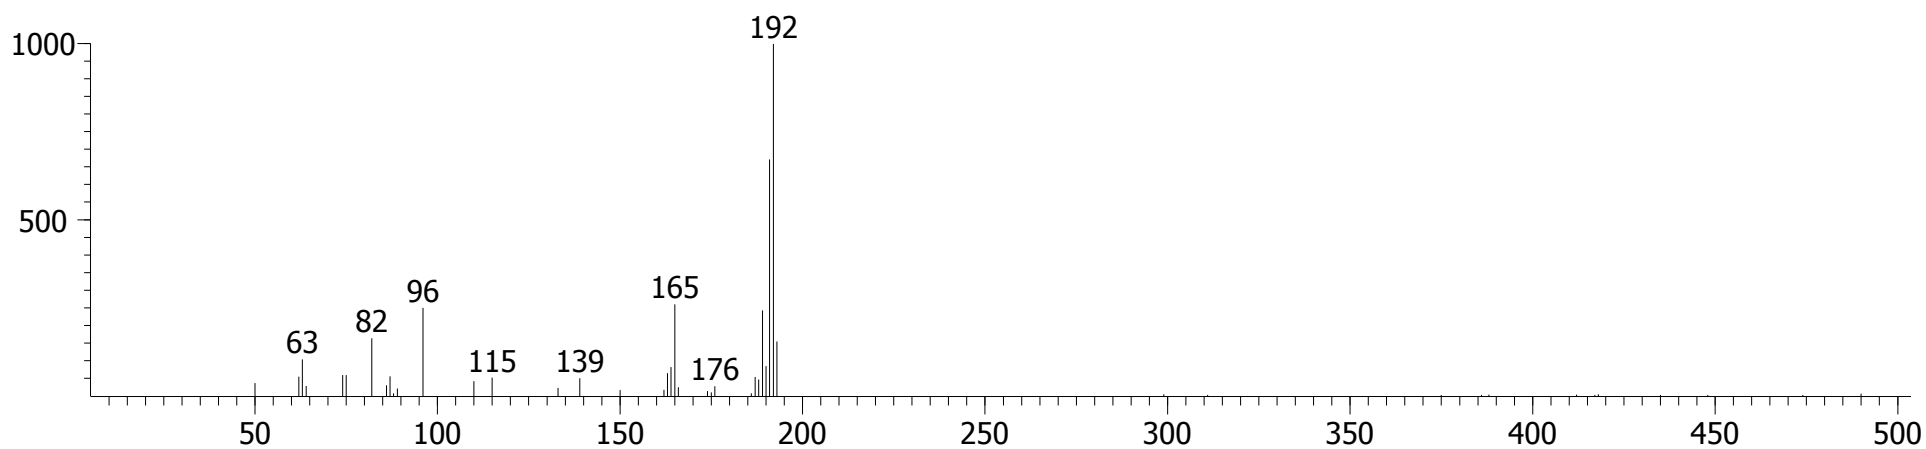

Library Hit - similarity 903, "5H-Dibenzo[a,d]cycloheptene"





Sample 1, Fraction 1 (Hexane/DCM)

1-Phenanthrenecarboxaldehyde,  
9,10,10a-octahydro-1,4a-dimethyl-7-(1-methyl-

CAS # = 24035-50-5  
1st Dimension R.T. = 1292.6  
2nd Dimension R.T. = 1.010  
Quant Mass(es) = 241  
S/N = 1295.2  
Area = 22295  
Height = 3469.6

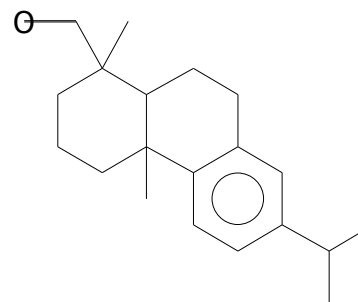

Peak True - sample "Lipid BM 1 F1:1", peak 1319, at 1292.6 , 1.010 sec , sec (Spec # 105093)

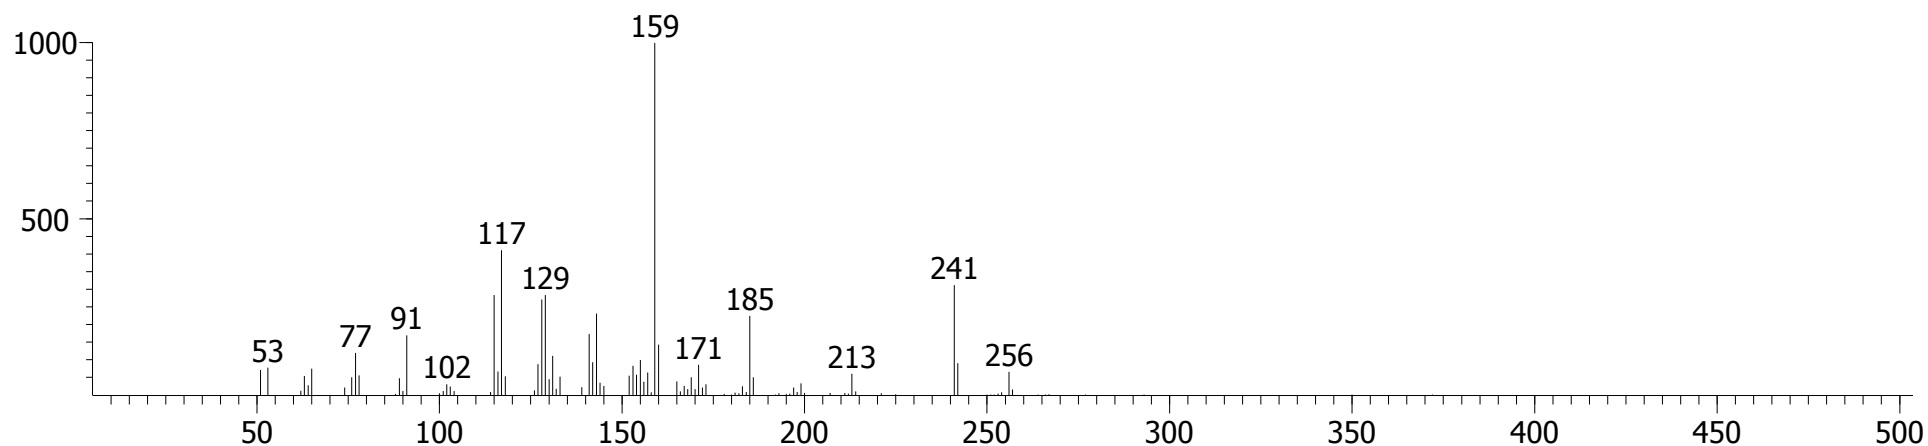

Library Hit - similarity 831, "1-Phenanthrenecarboxaldehyde, 1,2,3,4,4a,9,10,10a-octahydro-1,4a-dimethyl-7-(1-methylethyl)-, [1S-(1a,4a,10a)]-"

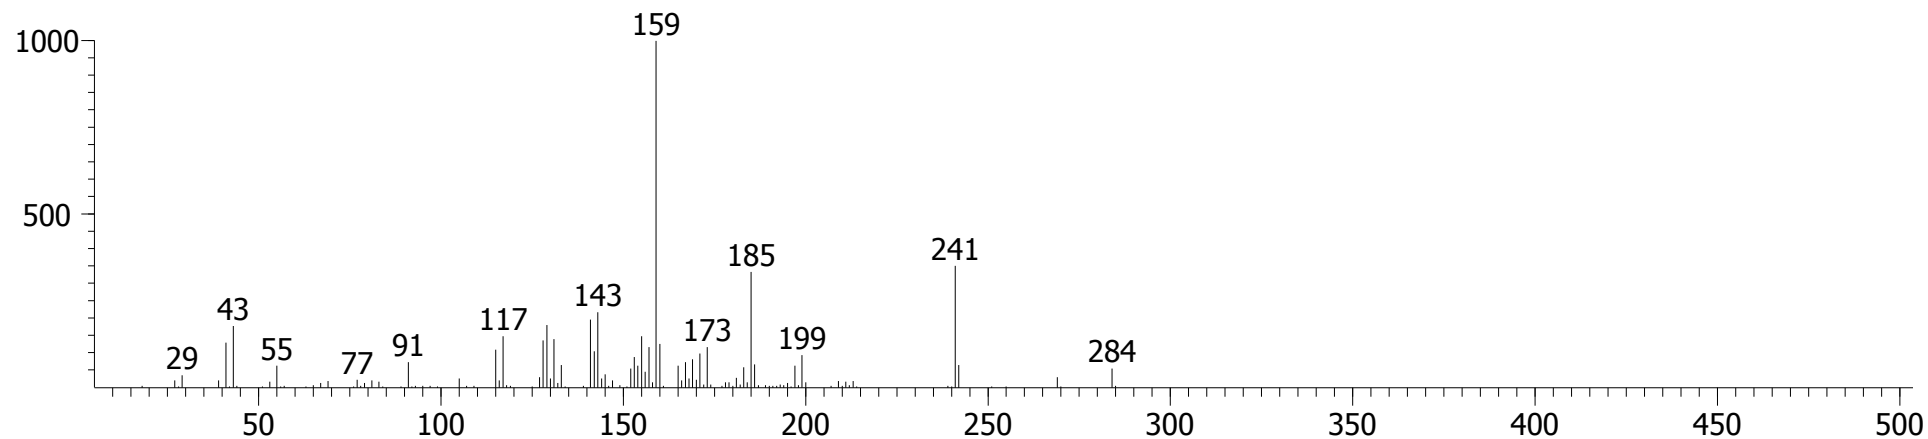

Sample 1, Fraction 1 (Hexane/DCM)

1(2H)-Naphthalenone,  
3,4-dihydro-4-phenyl-

CAS # = 0-00-0  
1st Dimension R.T. = 1306.6  
2nd Dimension R.T. = 1.175  
Quant Mass(es) = 222  
S/N = 161.78  
Area = 5692.6  
Height = 936.73

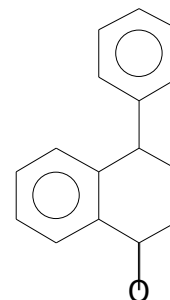

Peak True - sample "Lipid BM 1 F1:1", peak 1359, at 1306.6 , 1.175 sec , sec (Spec # 107238)

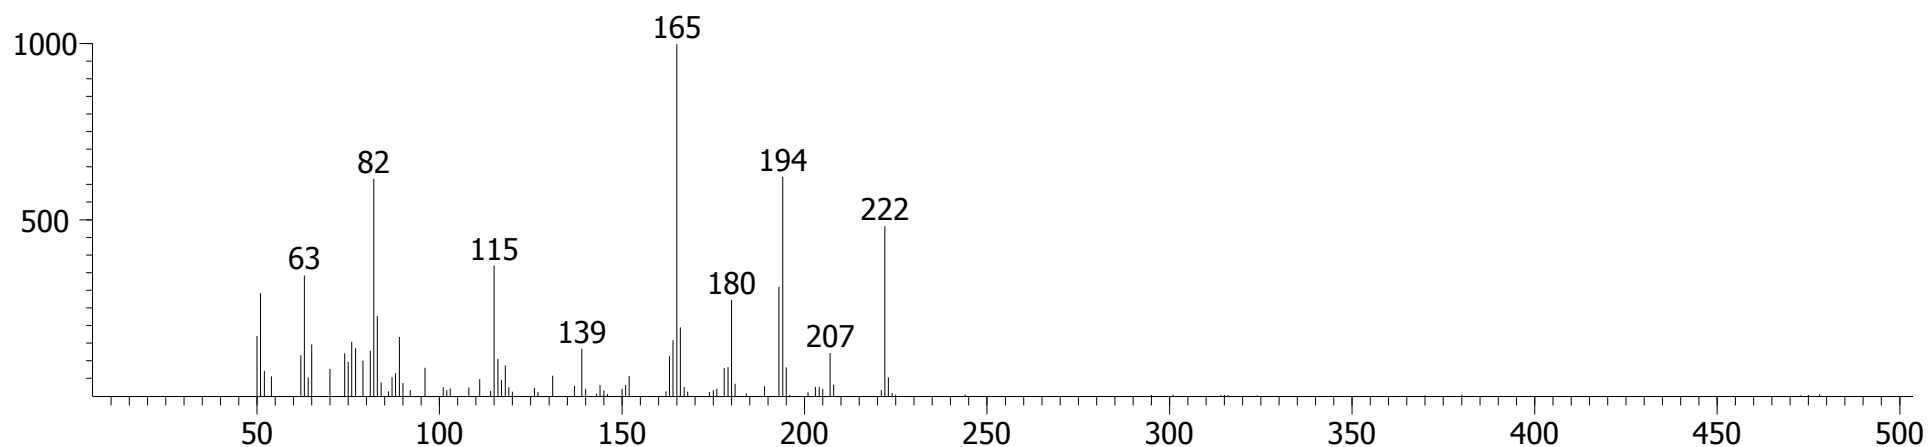

Library Hit - similarity 856, "1(2H)-Naphthalenone, 3,4-dihydro-4-phenyl-"

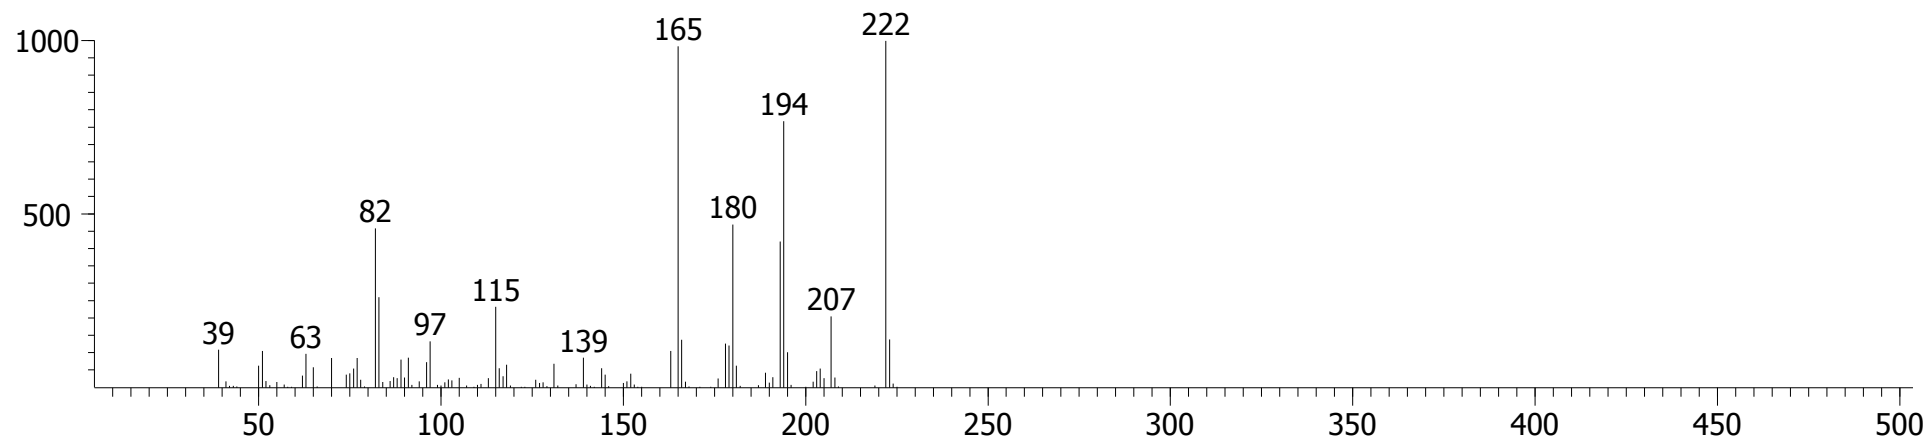

Sample 1, Fraction 1 (Hexane/DCM)

10,18-Bisnorabieta-8,11,13-triene

CAS # = 32624-67-2  
1st Dimension R.T. = 1327.58  
2nd Dimension R.T. = 1.069  
Quant Mass(es) = 242  
S/N = 1941.4  
Area = 53528  
Height = 4091.3

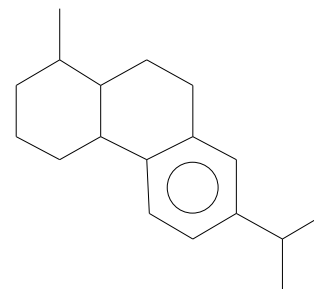

Peak True - sample "Lipid BM 1 F1:1", peak 1413, at 1327.58 , 1.069 sec , sec (Spec # 110402)

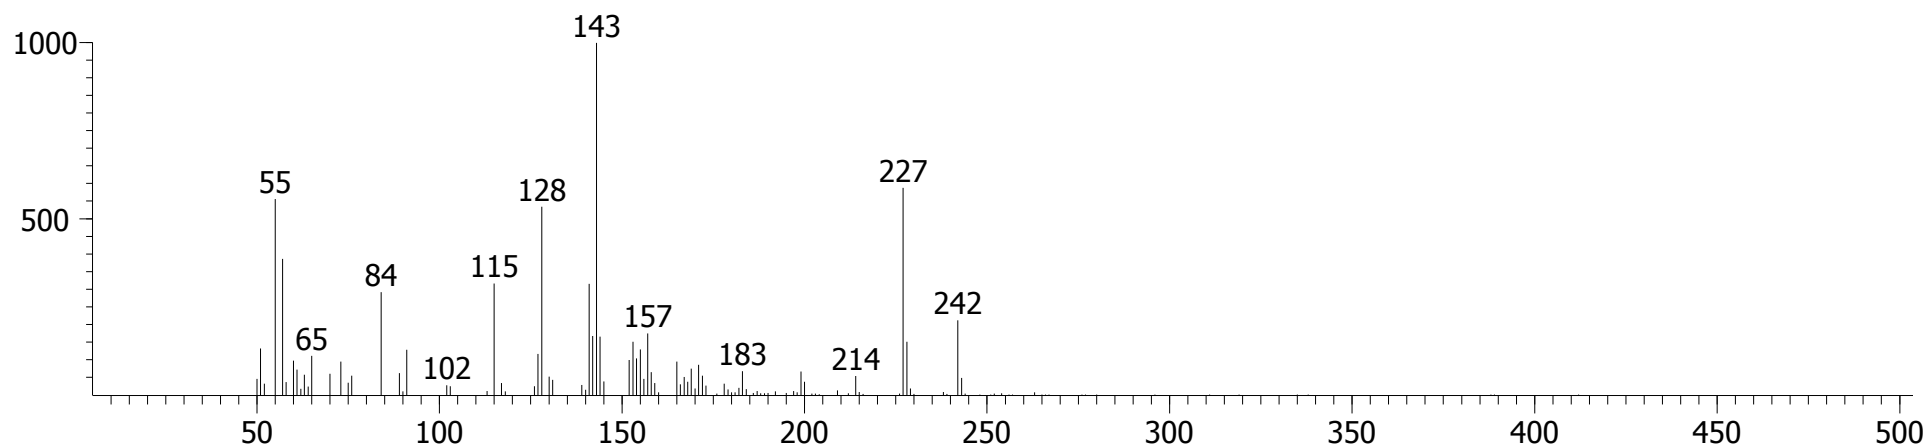

Library Hit - similarity 799, "10,18-Bisnorabieta-8,11,13-triene"

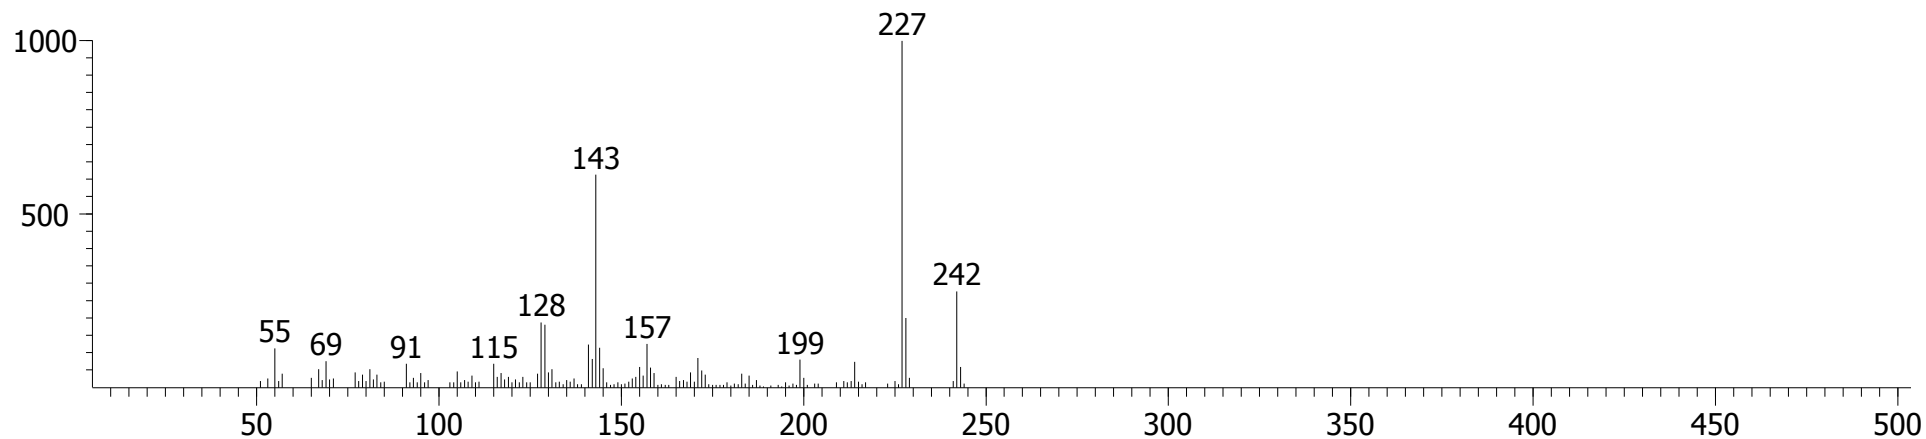

Sample 1, Fraction 1 (Hexane/DCM)

Phenanthrene, 2,3-dimethyl-

CAS # = 3674-65-5  
1st Dimension R.T. = 1334.58  
2nd Dimension R.T. = 1.148  
Quant Mass(es) = 206  
S/N = 249.58  
Area = 33059  
Height = 3793.6

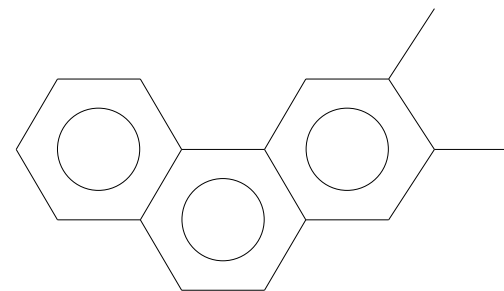

Peak True - sample "Lipid BM 1 F1:1", peak 1430, at 1334.58 , 1.148 sec , sec (Spec # 111474)

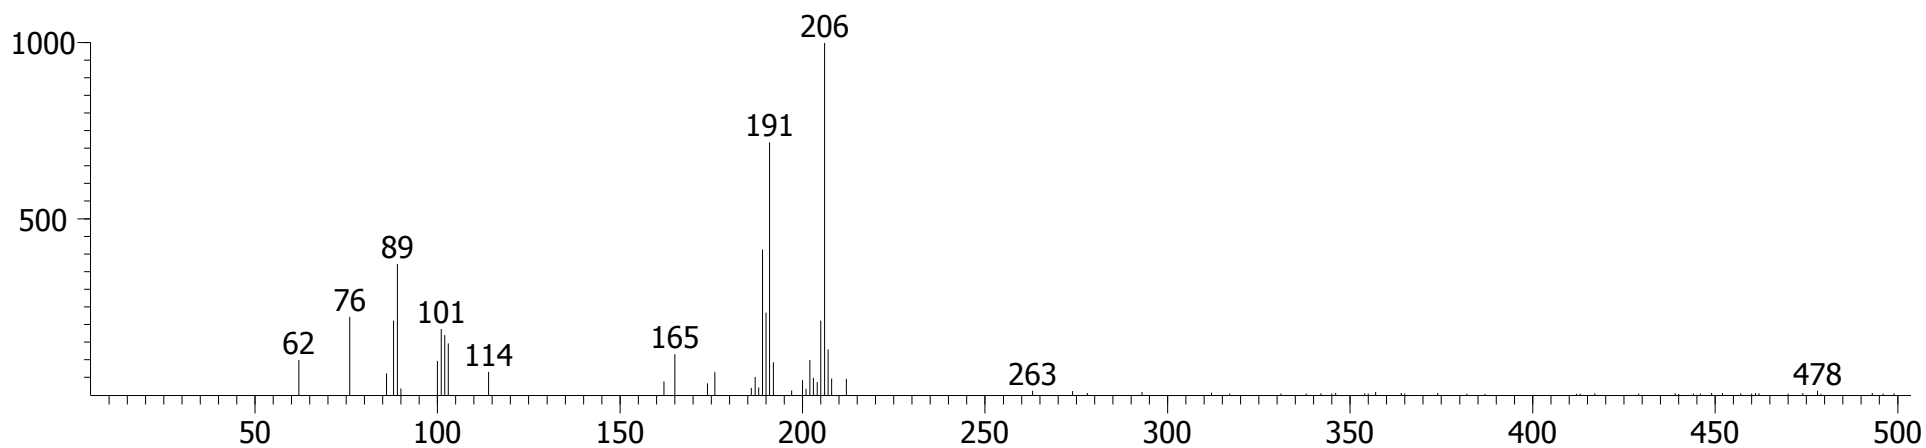

Library Hit - similarity 879, "Phenanthrene, 2,3-dimethyl-"

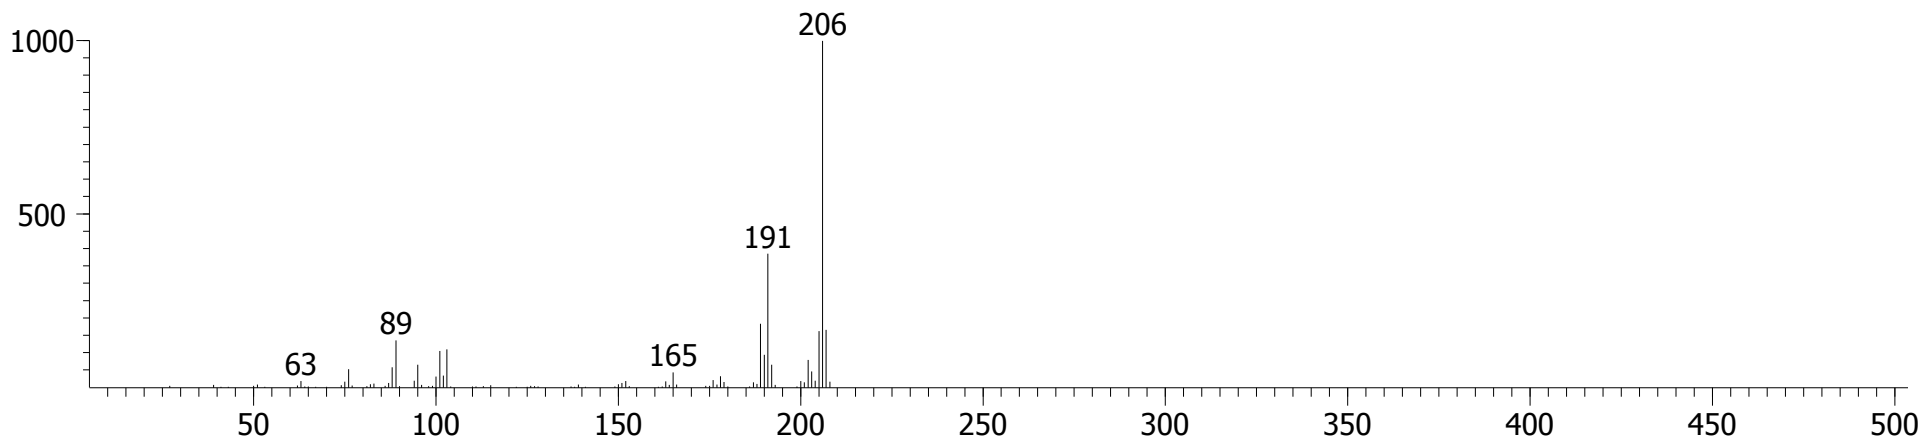

# Sample 1, Fraction 1 (Hexane/DCM)

## Fluoranthene

CAS # = 206-44-0  
1st Dimension R.T. = 1355.57  
2nd Dimension R.T. = 1.208  
Quant Mass(es) = 202  
S/N = 128.54  
Area = 6145.3  
Height = 795.26

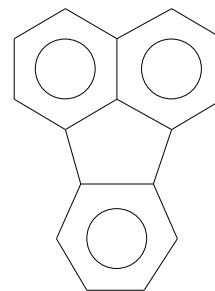

Peak True - sample "Lipid BM 1 F1:1", peak 1484, at 1355.57 , 1.208 sec , sec (Spec # 114663)

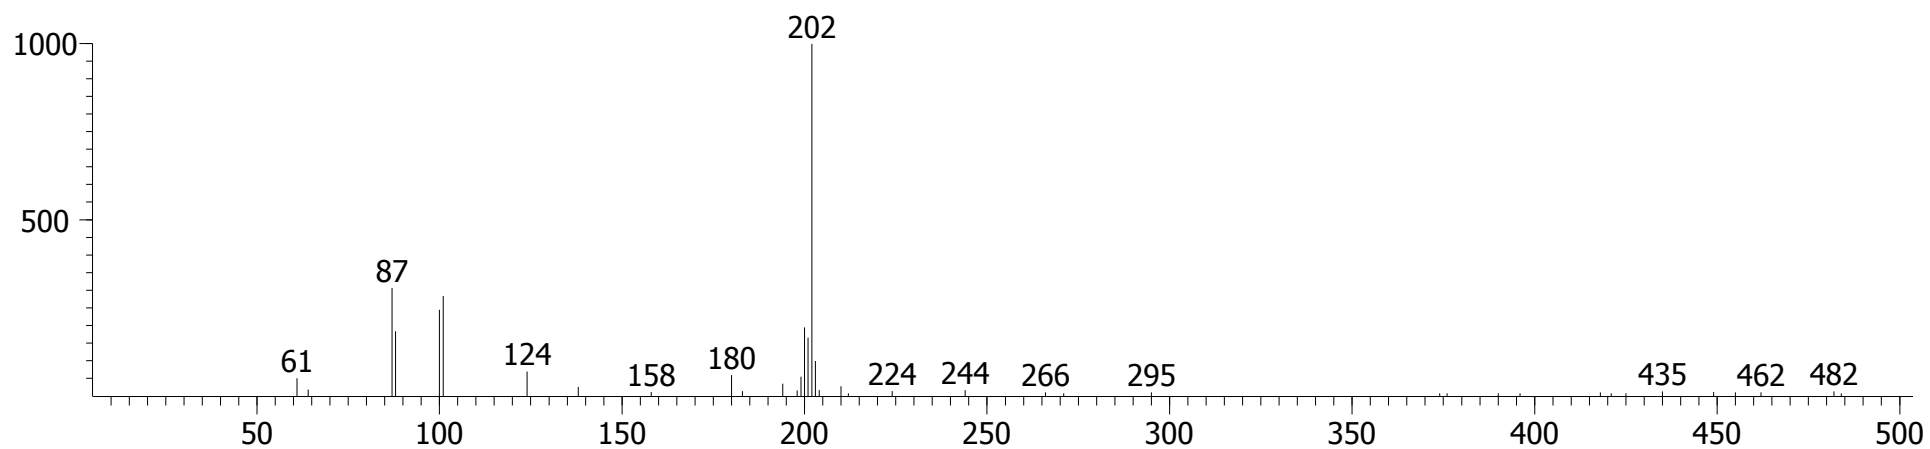

Library Hit - similarity 840, "Fluoranthene"

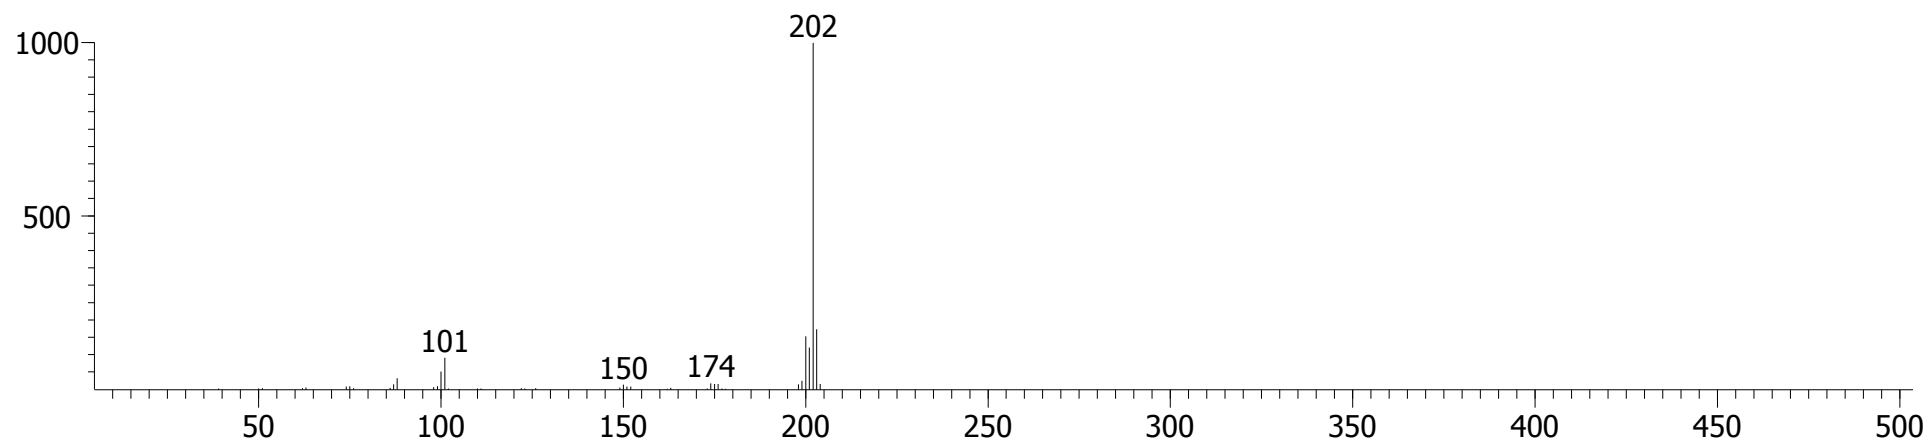

Sample 1, Fraction 1 (Hexane/DCM)

1,18-Bisnorabieta-5,7,9(10),11,13-pentaer

CAS # = 6566-19-4  
1st Dimension R.T. = 1359.07  
2nd Dimension R.T. = 1.082  
Quant Mass(es) = 238  
S/N = 57.047  
Area = 8505.0  
Height = 1182.1

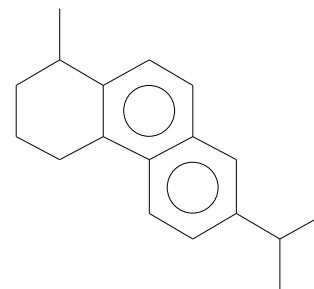

Peak True - sample "Lipid BM 1 F1:1", peak 1493, at 1359.07 , 1.082 sec , sec (Spec # 115174)

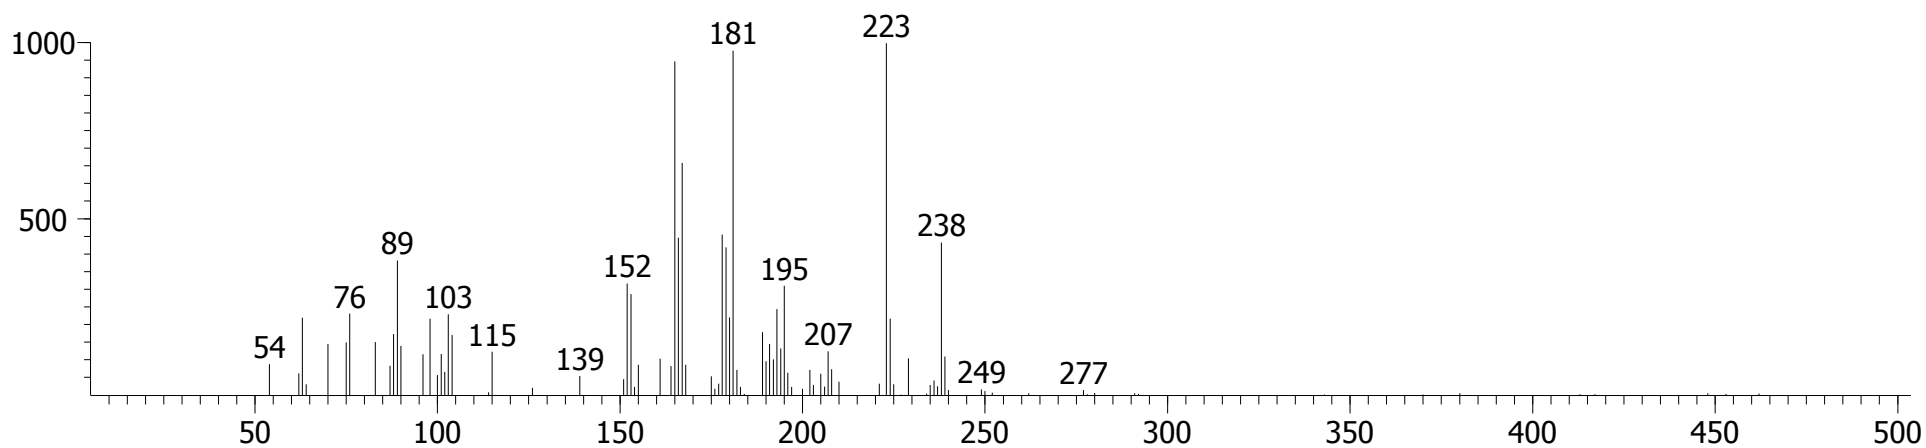

Library Hit - similarity 802, "10,18-Bisnorabieta-5,7,9(10),11,13-pentaene"

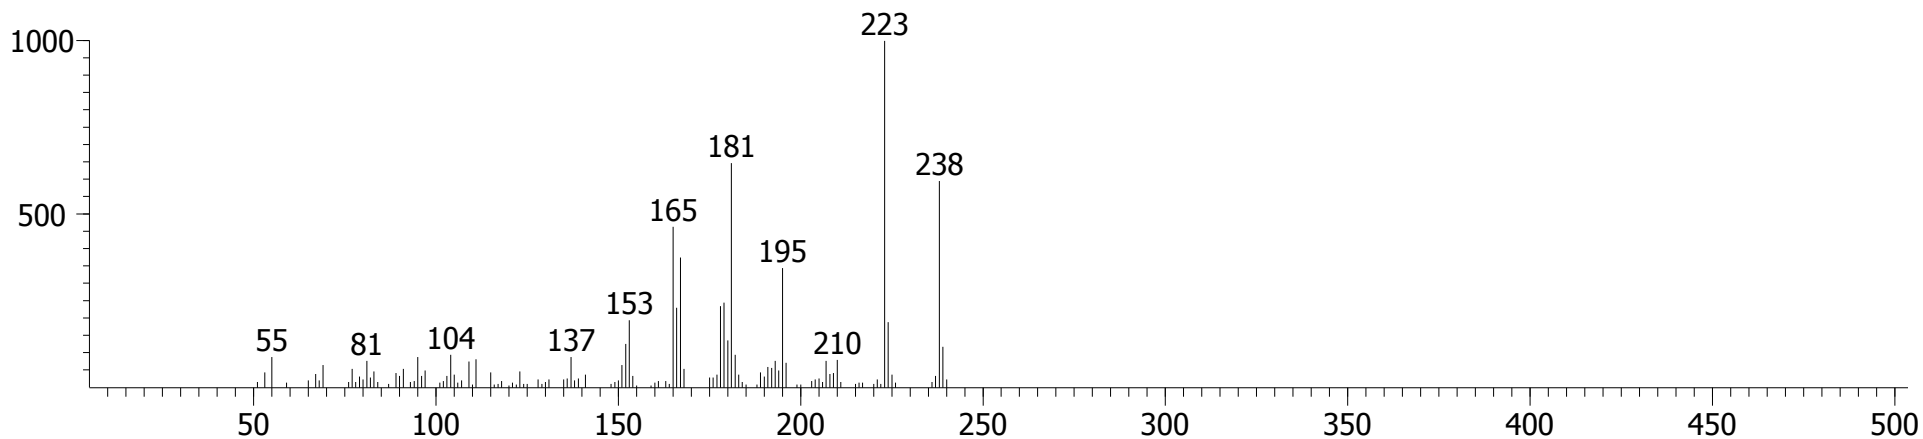

Sample 1, Fraction 1 (Hexane/DCM)

Fluoranthene

CAS # = 206-44-0  
1st Dimension R.T. = 1387.05  
2nd Dimension R.T. = 1.261  
Quant Mass(es) = 202  
S/N = 200.17  
Area = 9967.5  
Height = 1228.1



Peak True - sample "Lipid BM 1 F1:1", peak 1555, at 1387.05 , 1.261 sec , sec (Spec # 119441)

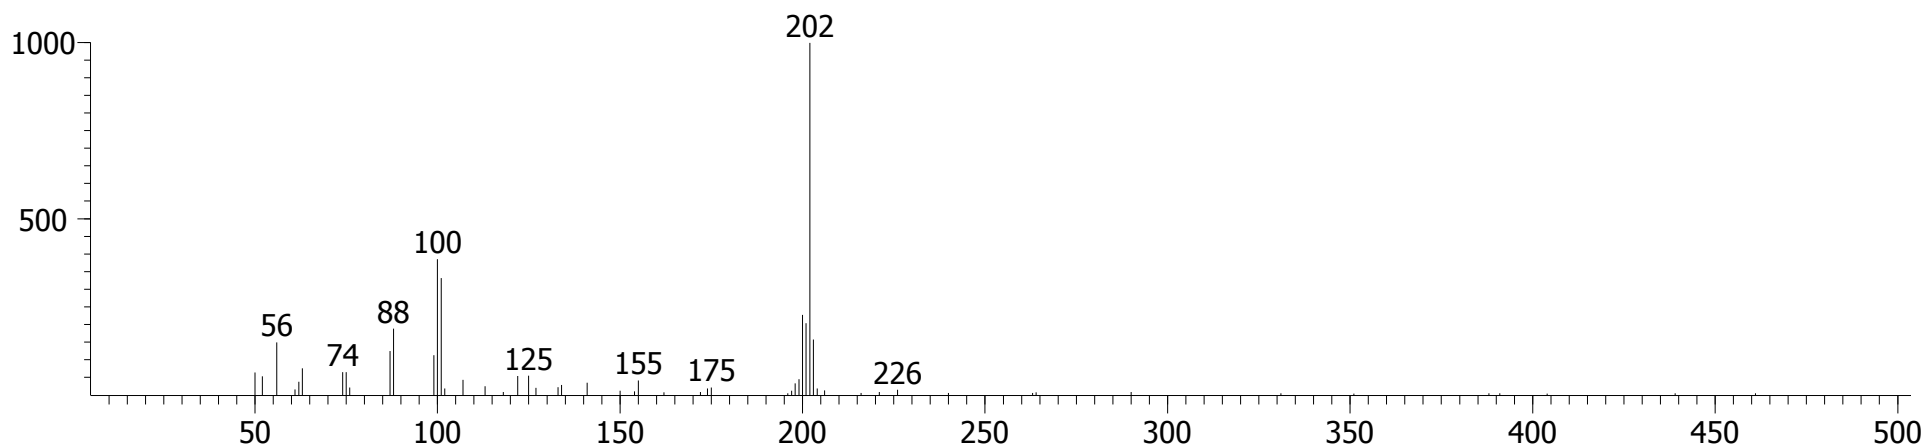

Library Hit - similarity 831, "Fluoranthene"

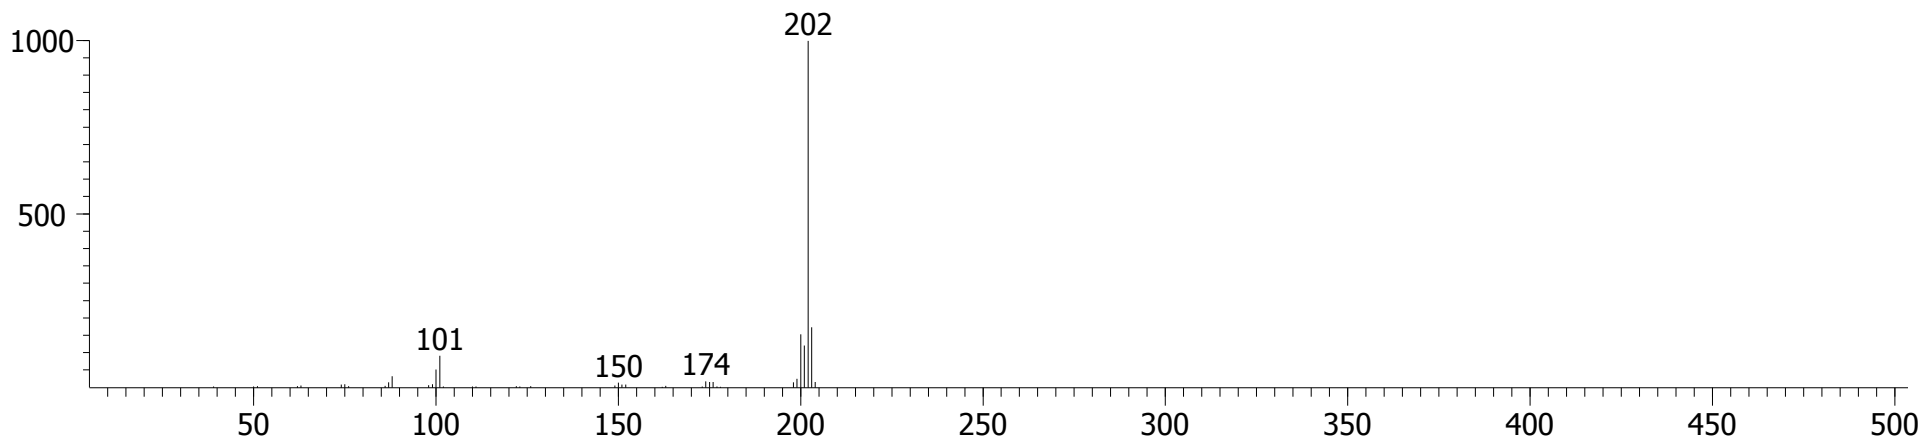

Sample 1, Fraction 1 (Hexane/DCM)

1-Methyl-10,18-bisnorabieta-8,11,13-triene

CAS # = 0-00-0  
1st Dimension R.T. = 1390.55  
2nd Dimension R.T. = 1.063  
Quant Mass(es) = 256  
S/N = 159.86  
Area = 2173.5  
Height = 267.89

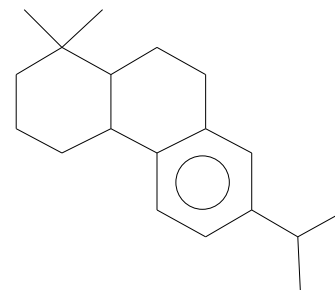

Peak True - sample "Lipid BM 1 F1:1", peak 1559, at 1390.55 , 1.063 sec , sec (Spec # 119941)

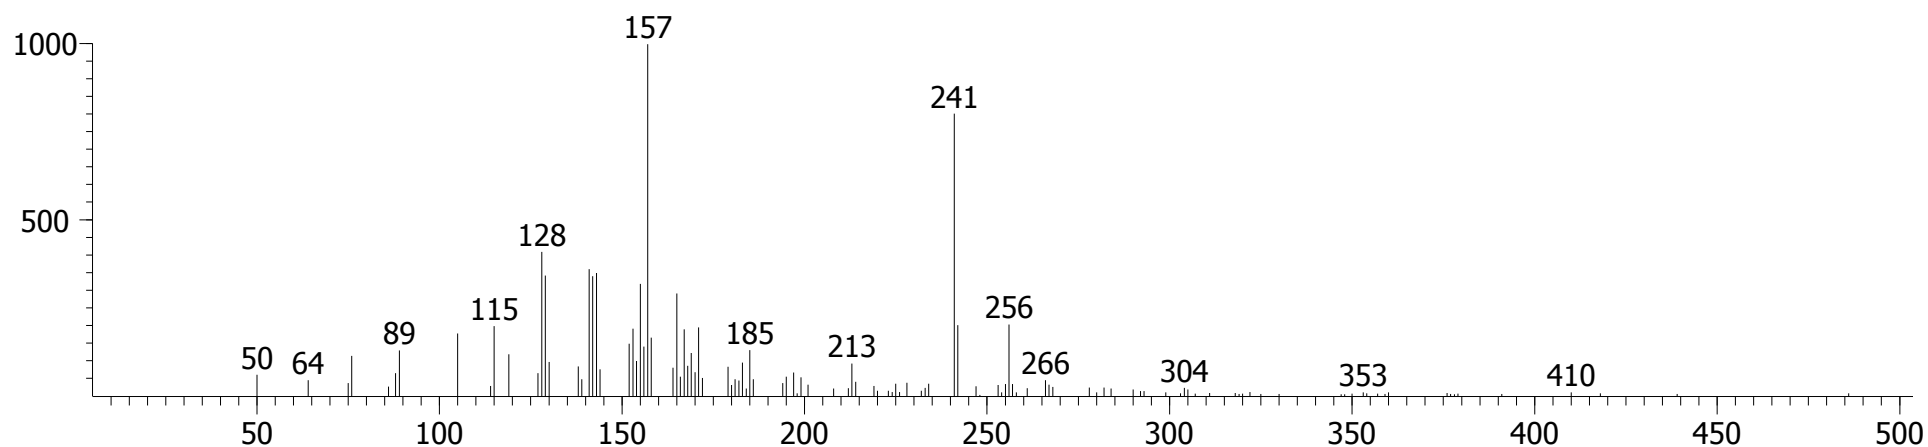

Library Hit - similarity 788, "1-Methyl-10,18-bisnorabieta-8,11,13-triene"

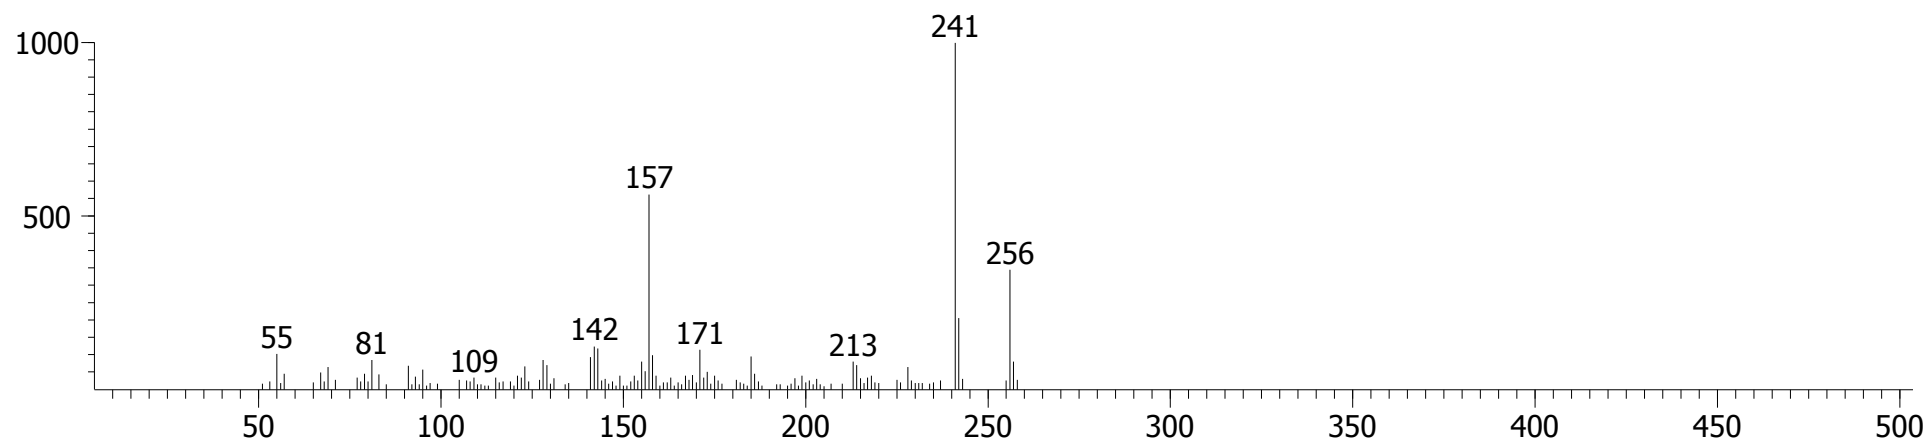



Sample 1, Fraction 1 (Hexane/DCM)

Phenanthrene, 2,3,5-trimethyl-

CAS # = 3674-73-5  
1st Dimension R.T. = 1394.05  
2nd Dimension R.T. = 1.142  
Quant Mass(es) = 220  
S/N = 110.11  
Area = 7965.7  
Height = 1079.0

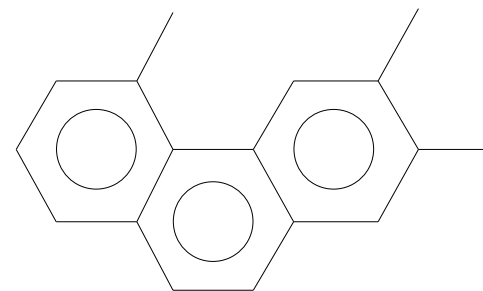

Peak True - sample "Lipid BM 1 F1:1", peak 1566, at 1394.05 , 1.142 sec , sec (Spec # 120483)

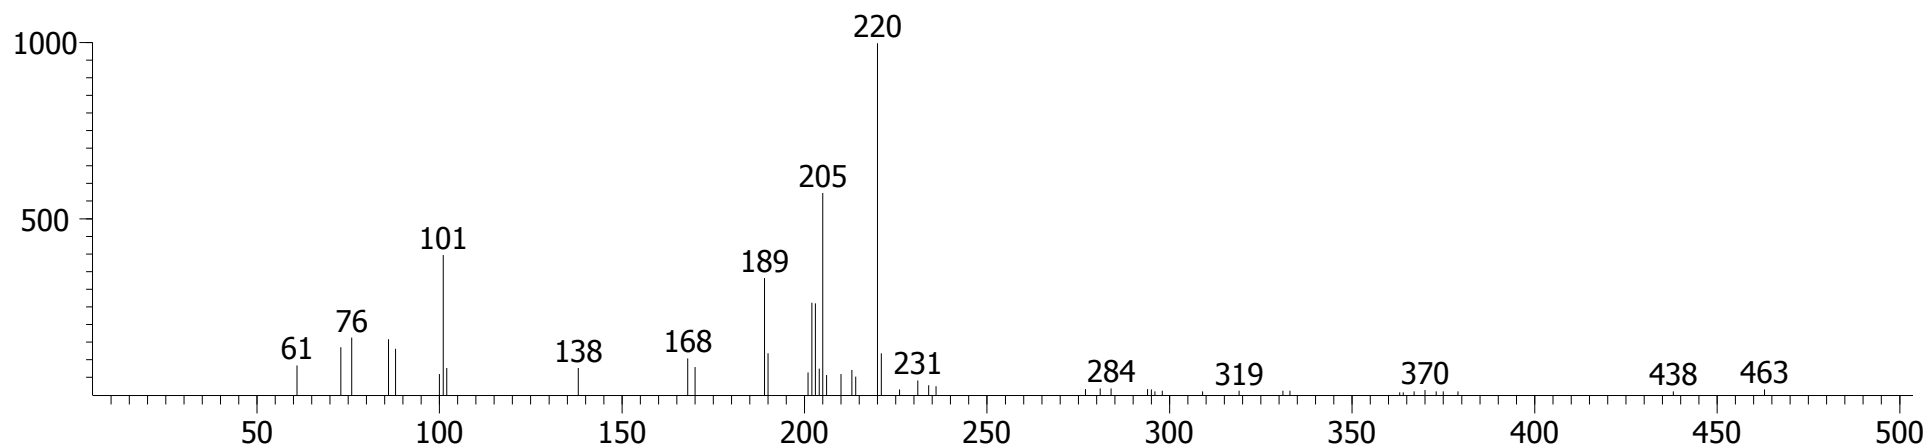

Library Hit - similarity 764, "Phenanthrene, 2,3,5-trimethyl-"

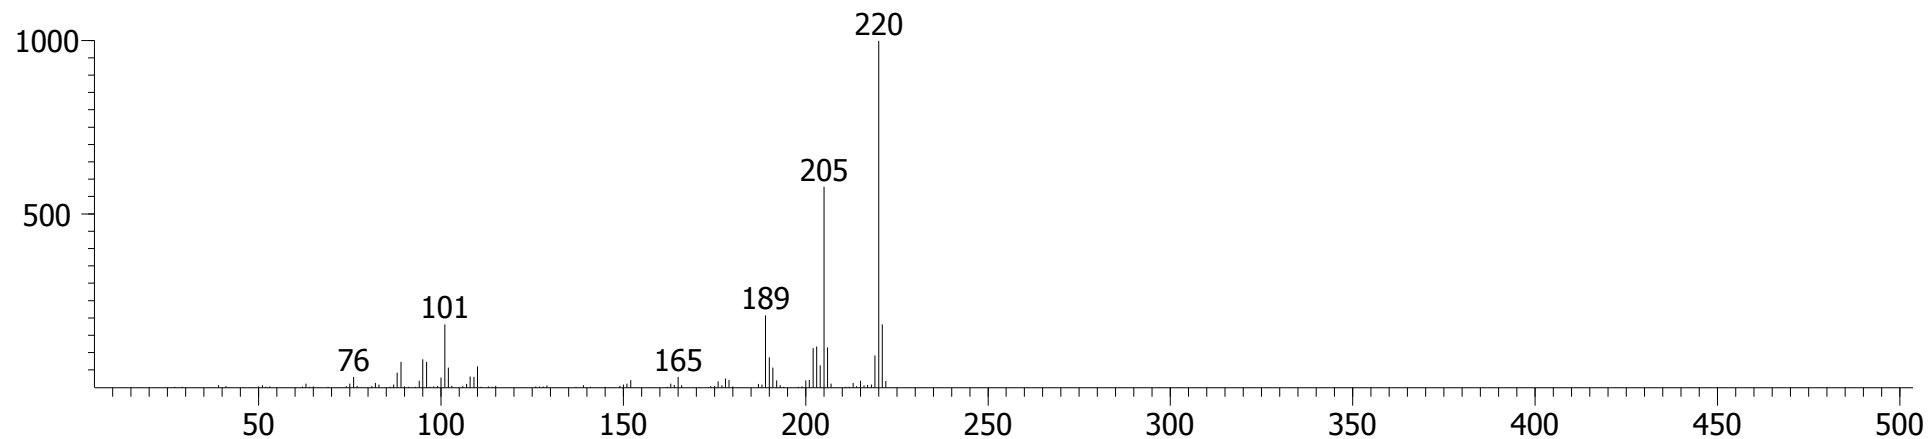

Sample 1, Fraction 1 (Hexane/DCM)

p,p'-DDE

CAS # = 72-55-9  
1st Dimension R.T. = 1401.04  
2nd Dimension R.T. = 1.109  
Quant Mass(es) = 318  
S/N = 7477.1  
Area = 224197  
Height = 31134

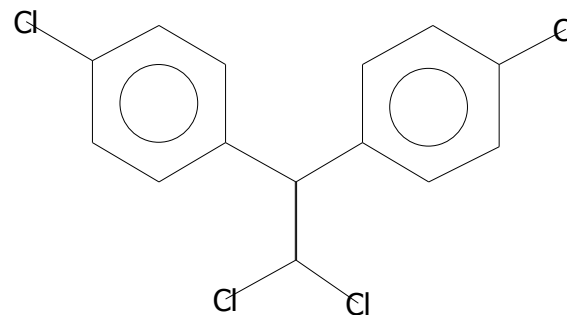

Peak True - sample "Lipid BM 1 F1:1", peak 1585, at 1401.04 , 1.109 sec , sec (Spec # 121538)

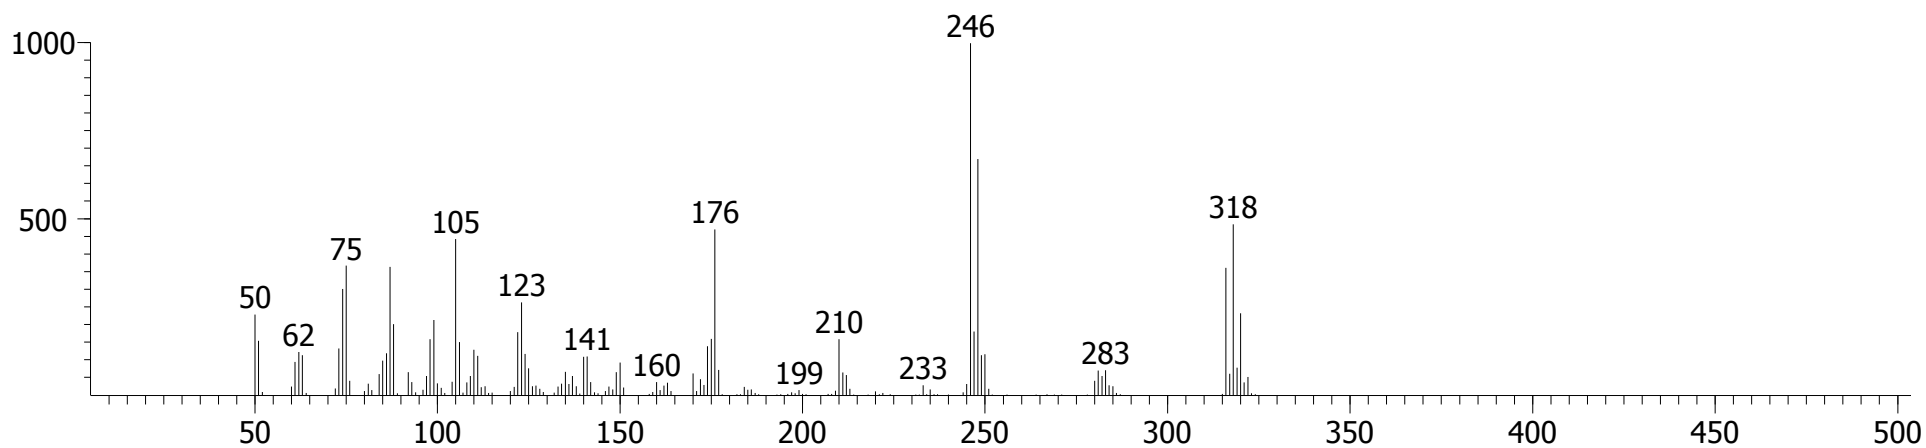

Library Hit - similarity 955, "p,p'-DDE"

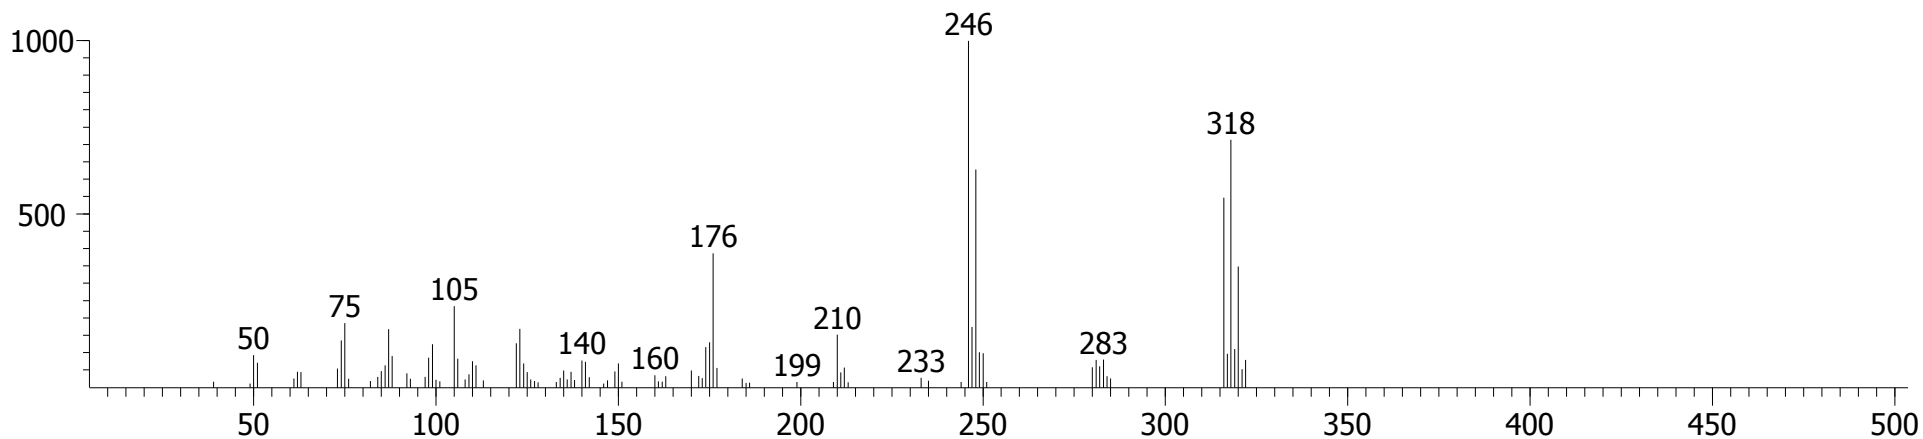

Sample 1, Fraction 1 (Hexane/DCM)

1,1'-Biphenyl, 2,2',4,4',5,5'-hexachloro-

CAS # = 74472-42-7  
1st Dimension R.T. = 1460.51  
2nd Dimension R.T. = 1.129  
Quant Mass(es) = 360  
S/N = 35.323  
Area = 1179.8  
Height = 191.59

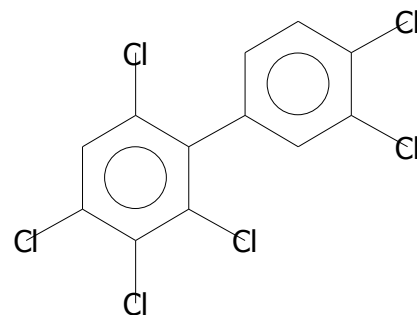

(PCB-153)

Peak True - sample "Lipid BM 1 F1:1", peak 1706, at 1460.51 , 1.129 sec , sec (Spec # 130551)

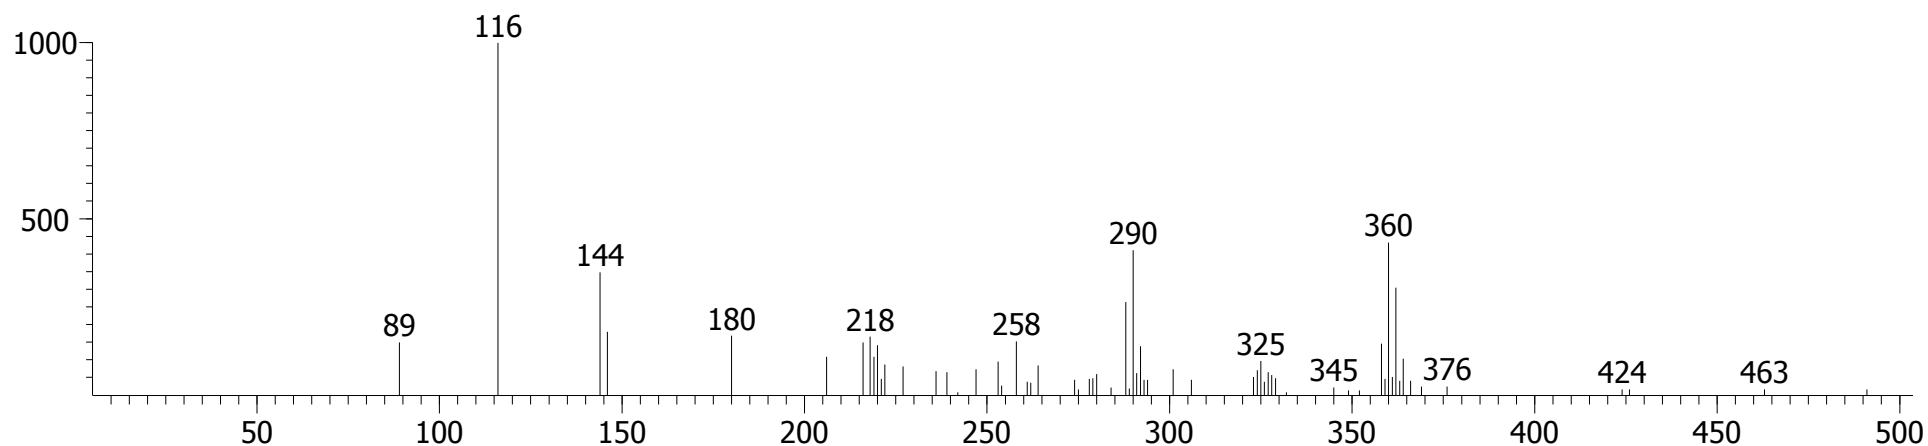

Library Hit - similarity 732, "2,3,3',4,4',6-Hexachloro-1,1'-biphenyl" (Assigned to PCB-153 based on retention time match to standard.)

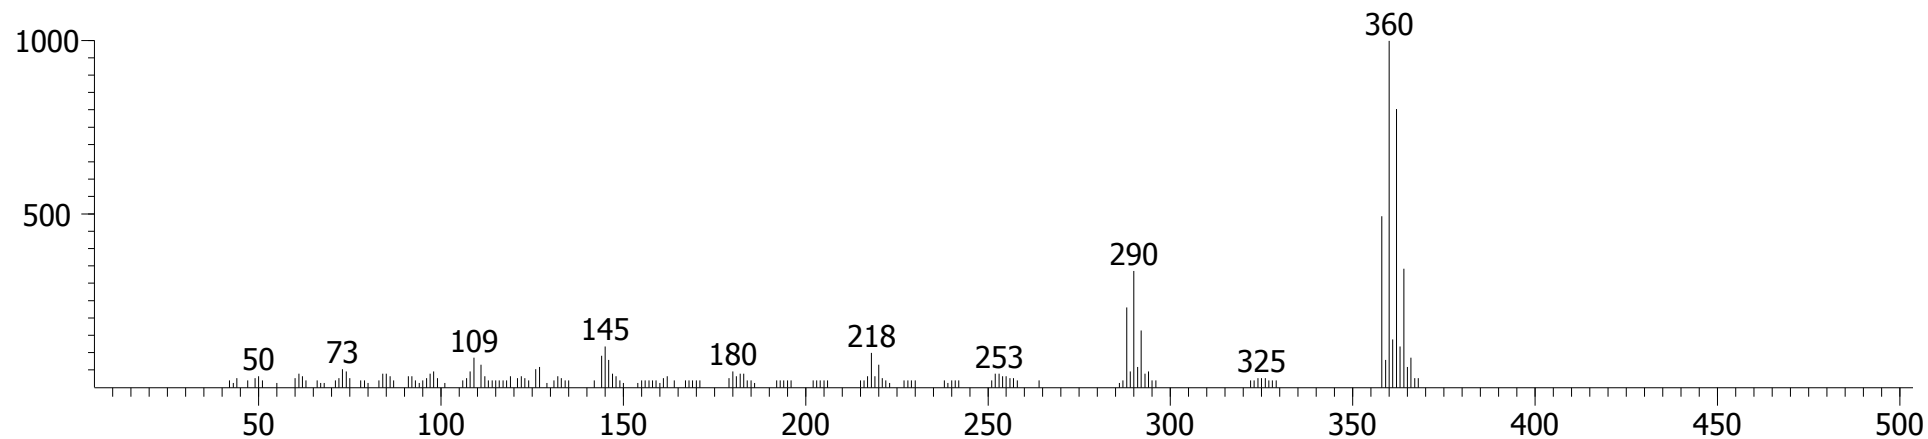

Sample 1, Fraction 1 (Hexane/DCM)

Benzyl butyl phthalate

CAS # = 85-68-7  
1st Dimension R.T. = 1471  
2nd Dimension R.T. = 1.195  
Quant Mass(es) = 206  
S/N = 4922.2  
Area = 63799  
Height = 8027.5

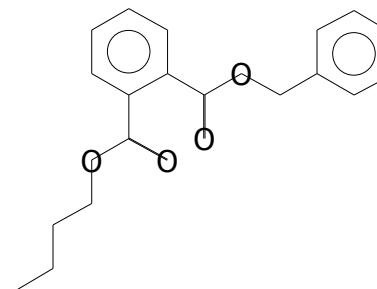

Peak True - sample "Lipid BM 1 F1:1", peak 1726, at 1471 , 1.195 sec , sec (Spec # 132151)

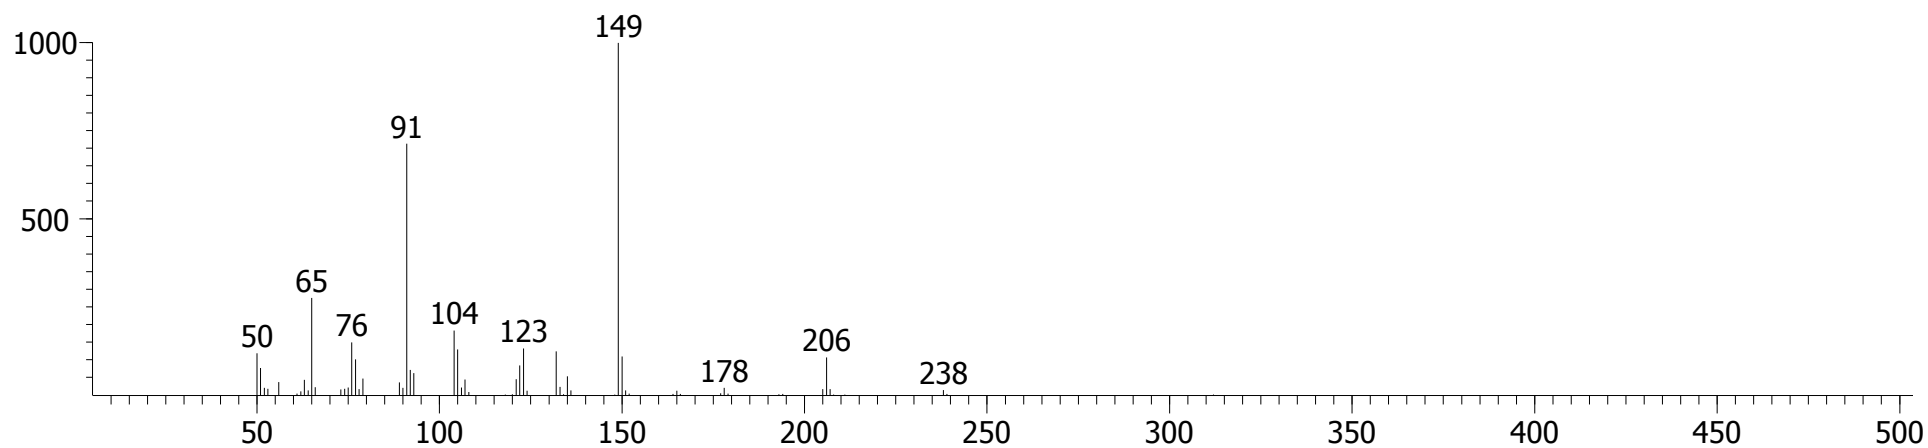

Library Hit - similarity 949, "Benzyl butyl phthalate"

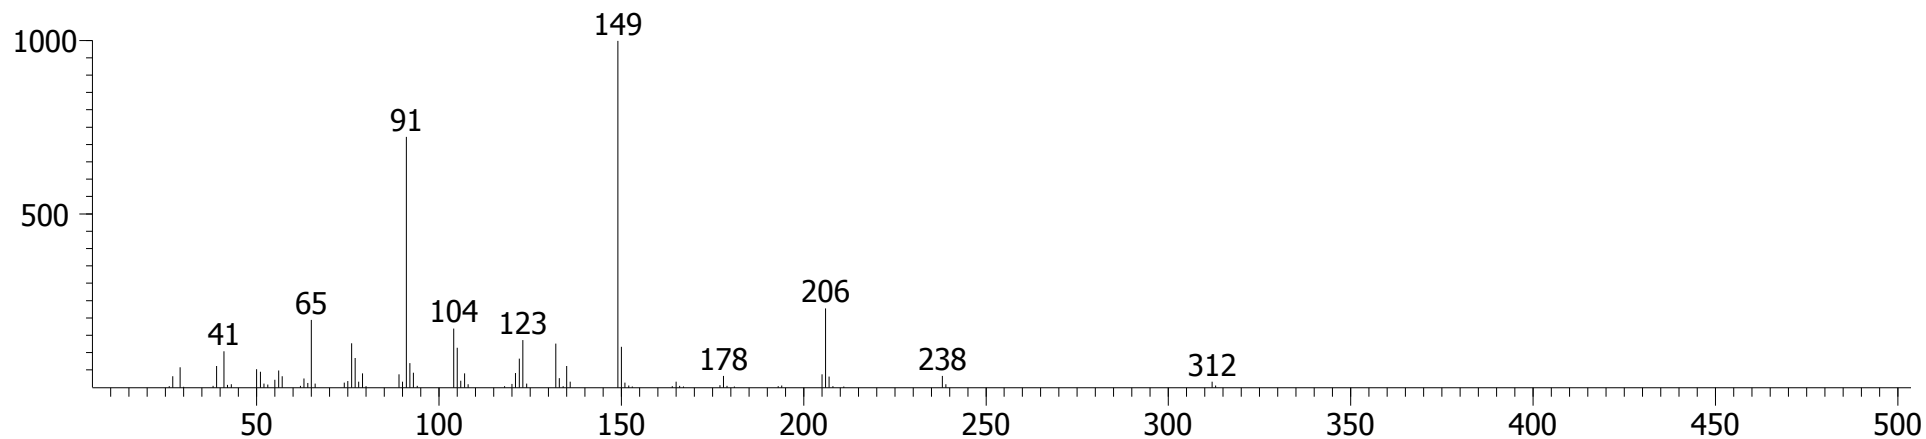

# Sample 1, Fraction 1 (Hexane/DCM)

## p,p'-DDT

CAS # = 50-29-3  
1st Dimension R.T. = 1484.99  
2nd Dimension R.T. = 1.181  
Quant Mass(es) = 235  
S/N = 99.035  
Area = 4553.6  
Height = 611.19

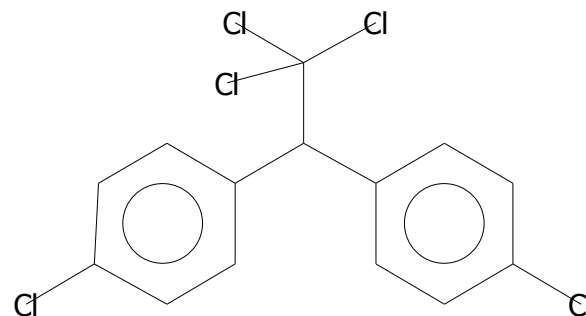

Peak True - sample "Lipid BM 1 F1:1", peak 1755, at 1484.99 , 1.181 sec , sec (Spec # 134269)

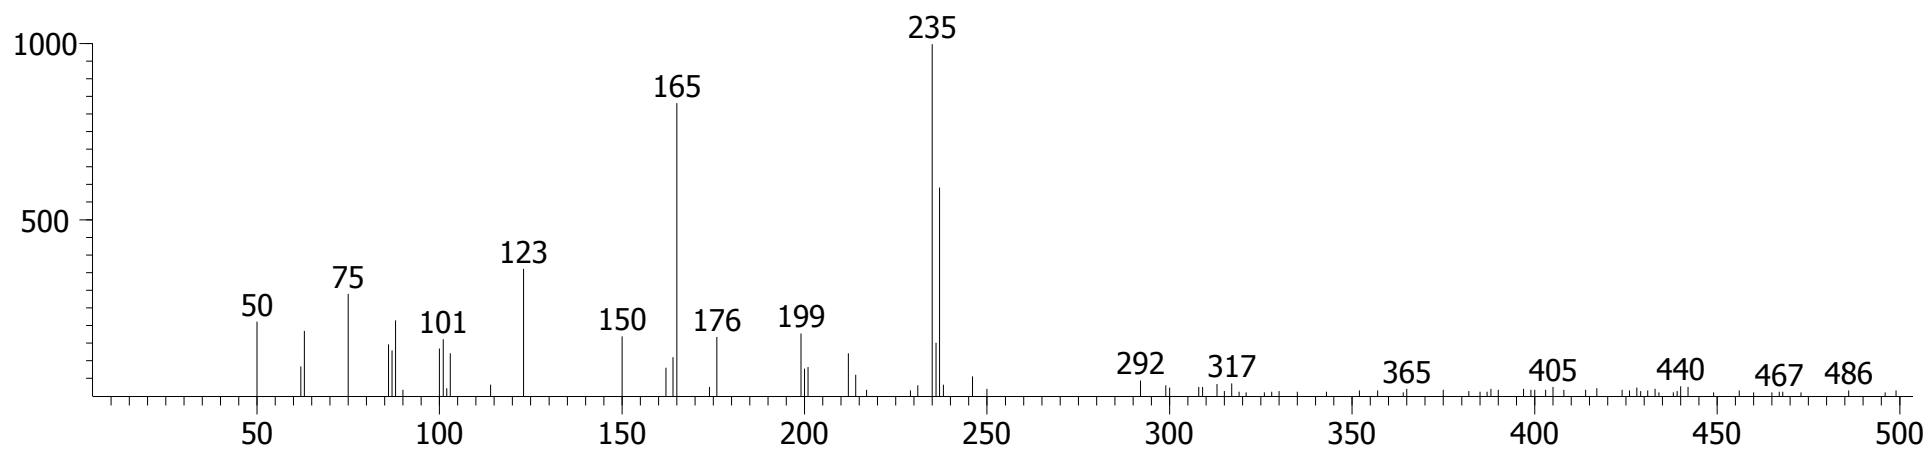

Library Hit - similarity 825, "p,p'-DDT"

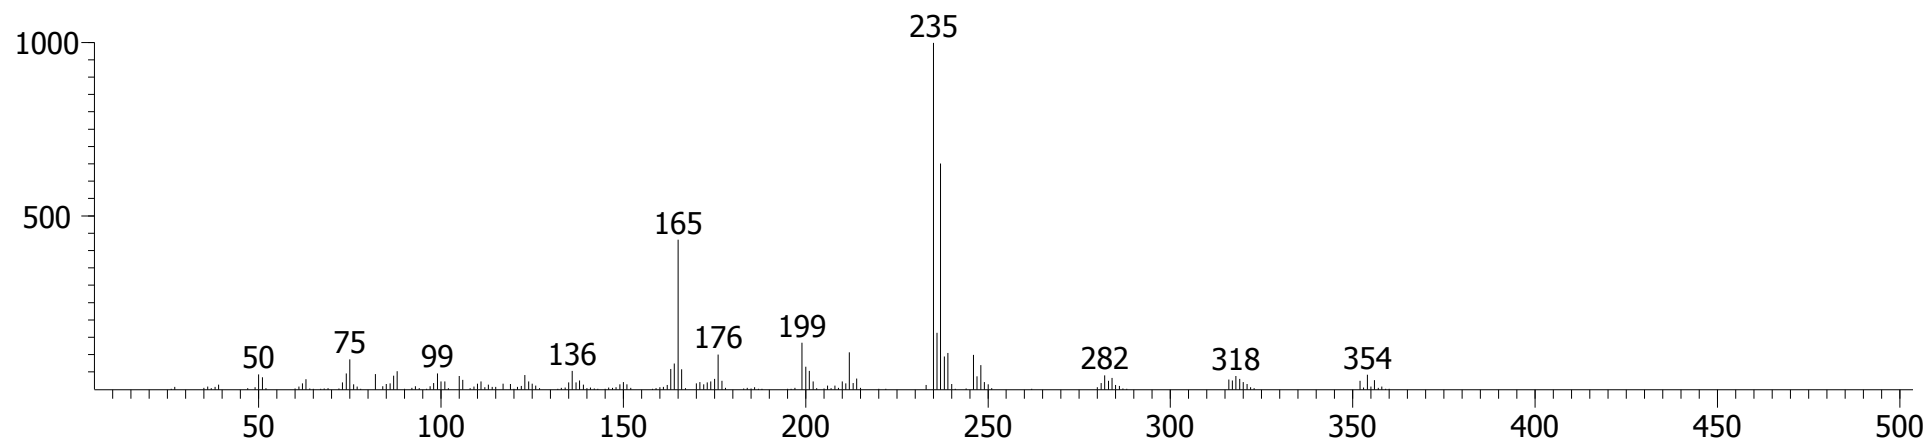

Sample 1, Fraction 1 (Hexane/DCM)

Benzamide, N-propyl-

CAS # = 10546-70-0  
1st Dimension R.T. = 1523.47  
2nd Dimension R.T. = 1.287  
Quant Mass(es) = 163  
S/N = 229.92  
Area = 27952  
Height = 2561.9

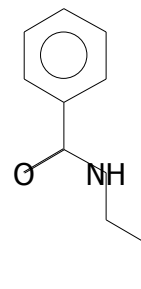

Peak True - sample "Lipid BM 1 F1:1", peak 1829, at 1523.47 , 1.287 sec , sec (Spec # 140115)

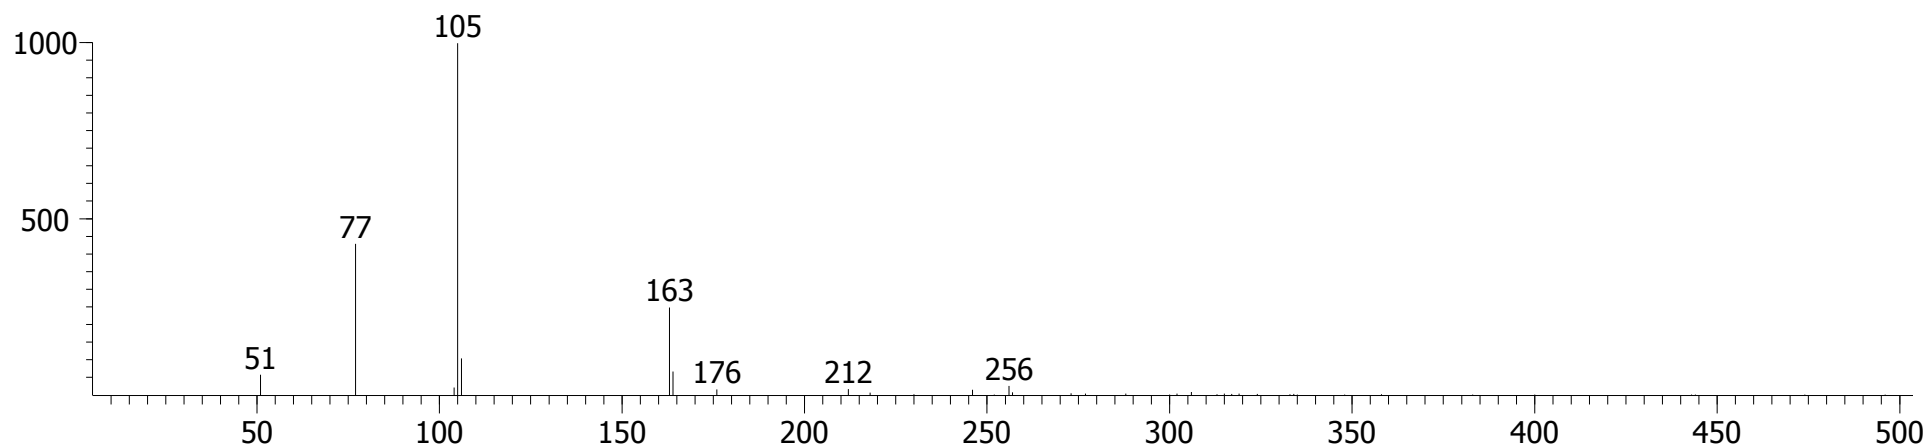

Library Hit - similarity 898, "Benzamide, N-propyl-"

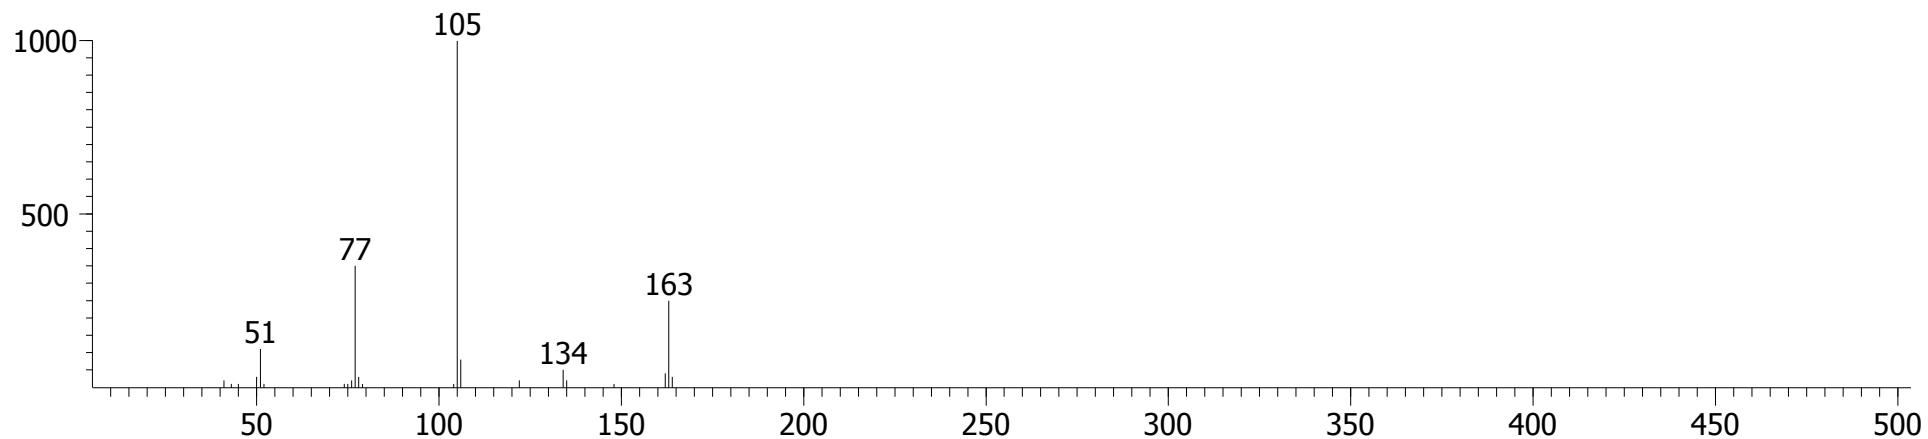

Sample 1, Fraction 1 (Hexane/DCM)

2-((3,5,5-Trimethylhexyloxy)carbonyl)benzoic acid

CAS # = 0-00-0  
1st Dimension R.T. = 1547.96  
2nd Dimension R.T. = 1.129  
Quant Mass(es) = 167  
S/N = 1537.1  
Area = 98504  
Height = 11271

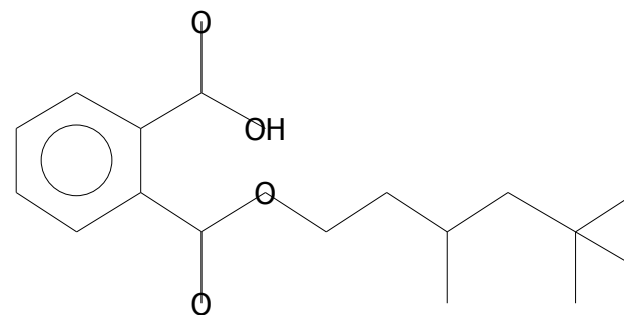

Peak True - sample "Lipid BM 1 F1:1", peak 1870, at 1547.96 , 1.129 sec , sec (Spec # 143801)

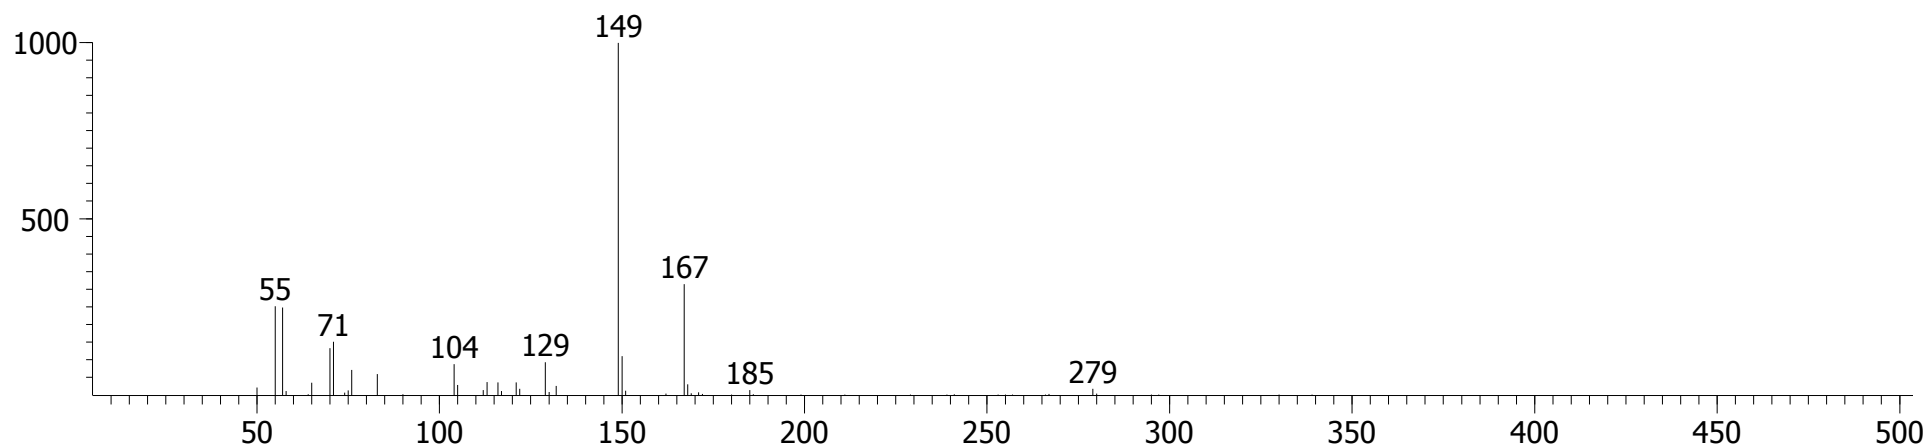

Library Hit - similarity 850, "2-((3,5,5-Trimethylhexyloxy)carbonyl)benzoic acid"

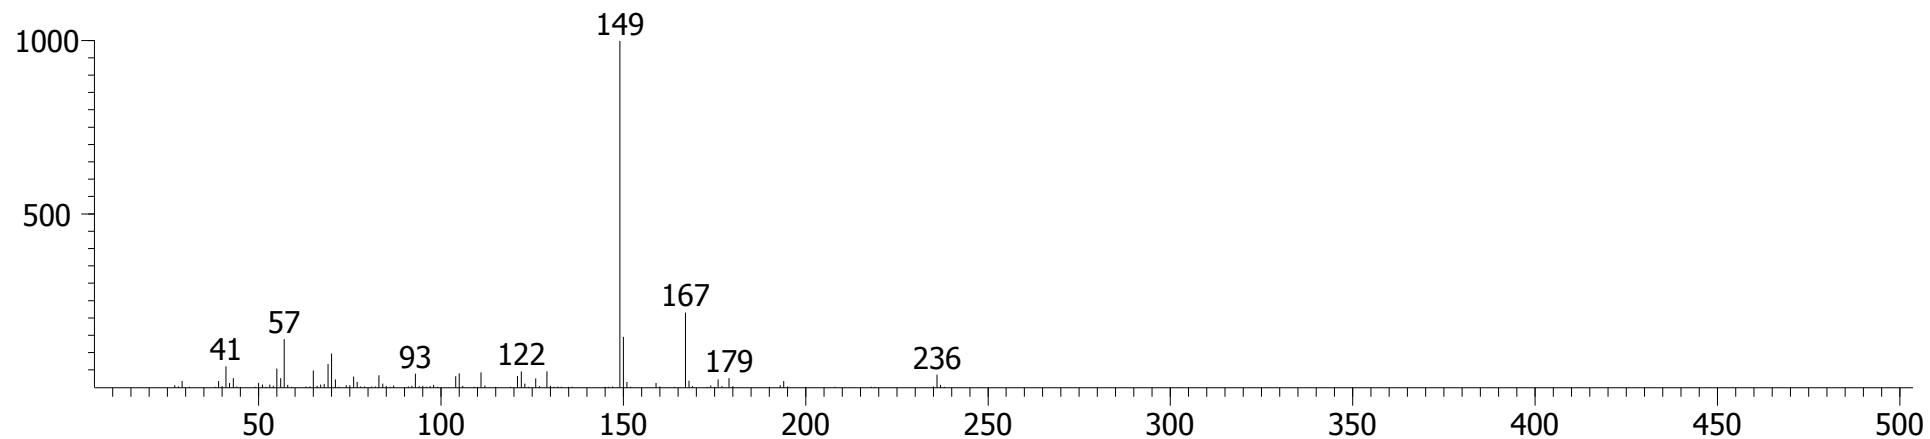

Sample 1, Fraction 1 (Hexane/DCM)

3-Chloro-2,6-dimethylpyridine

CAS # = 2405-06-3  
1st Dimension R.T. = 1666.89  
2nd Dimension R.T. = 1.353  
Quant Mass(es) = 141  
S/N = 128.79  
Area = 11134  
Height = 1088.4

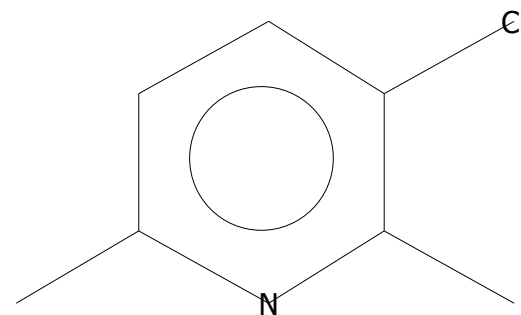

Peak True - sample "Lipid BM 1 F1:1", peak 2109, at 1666.89 , 1.353 sec , sec (Spec # 161855)

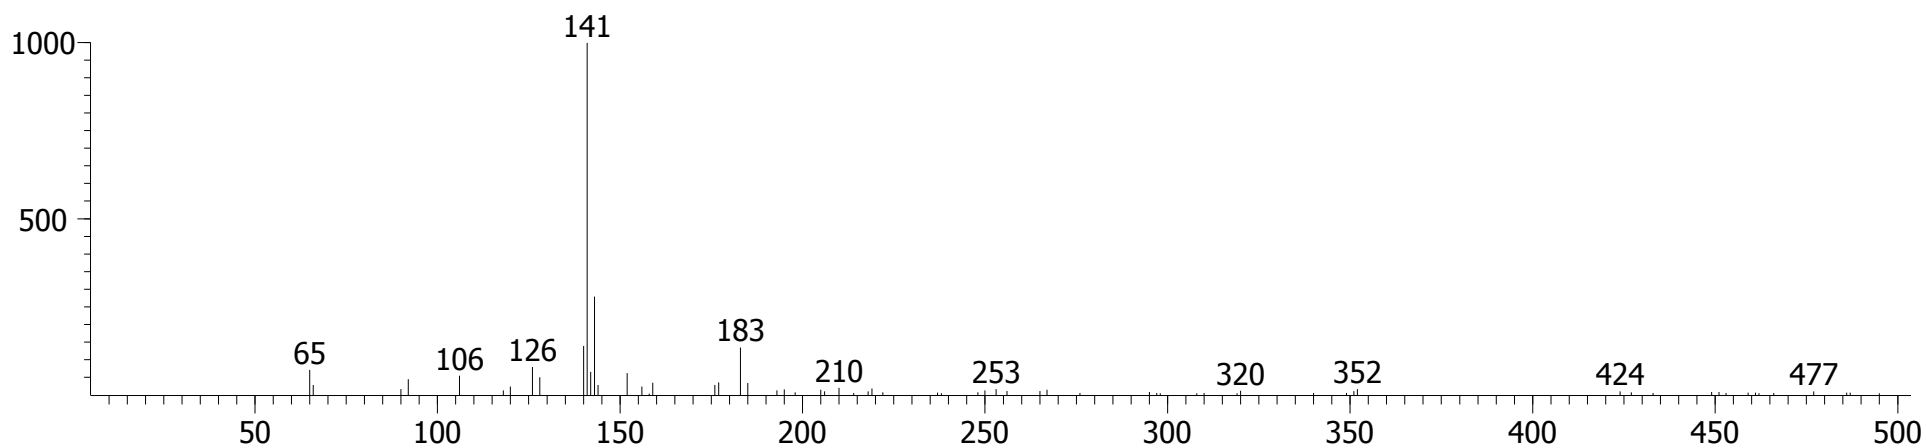

Library Hit - similarity 757, "3-Chloro-2,6-dimethylpyridine"

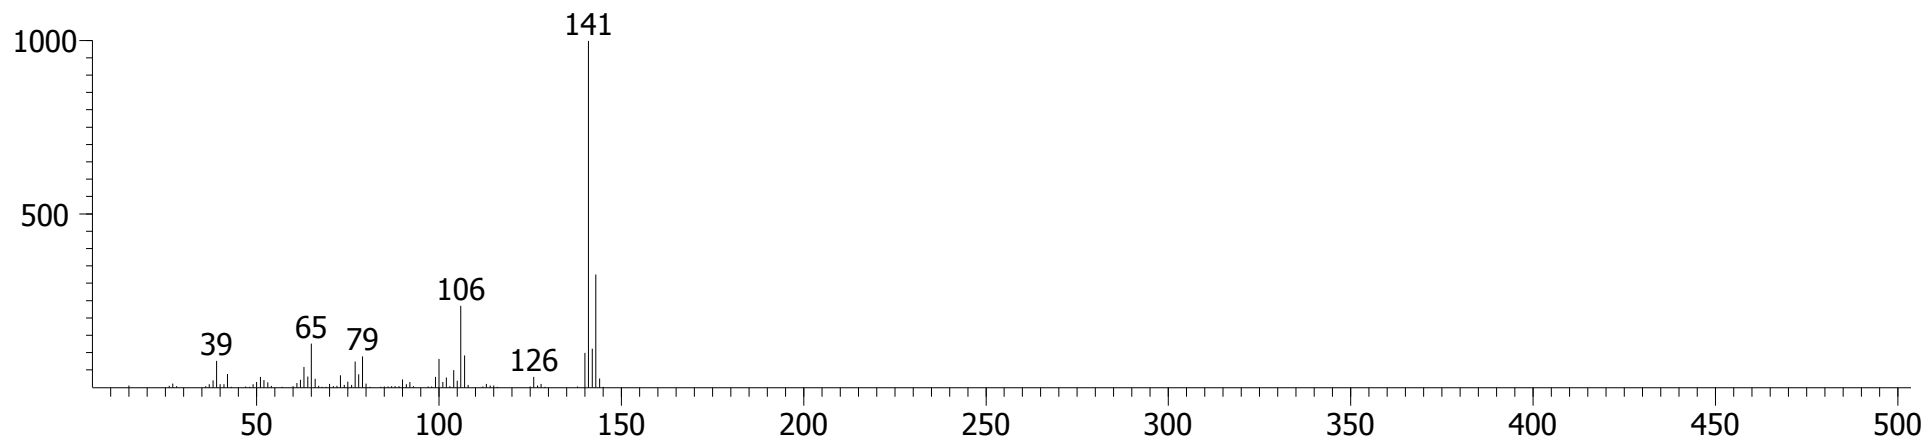



Sample 1, Fraction 1 (Hexane/DCM)

UNKNOWN # 7

CAS # = 2405-06-3  
1st Dimension R.T. = 1719.36  
2nd Dimension R.T. = 1.353  
Quant Mass(es) = 183  
S/N = 630.18  
Area = 2398.5  
Height = 352.31



Peak True - sample "Lipid BM 1 F1:1", peak 2199, at 1719.36 , 1.353 sec , sec (Spec # 169805)

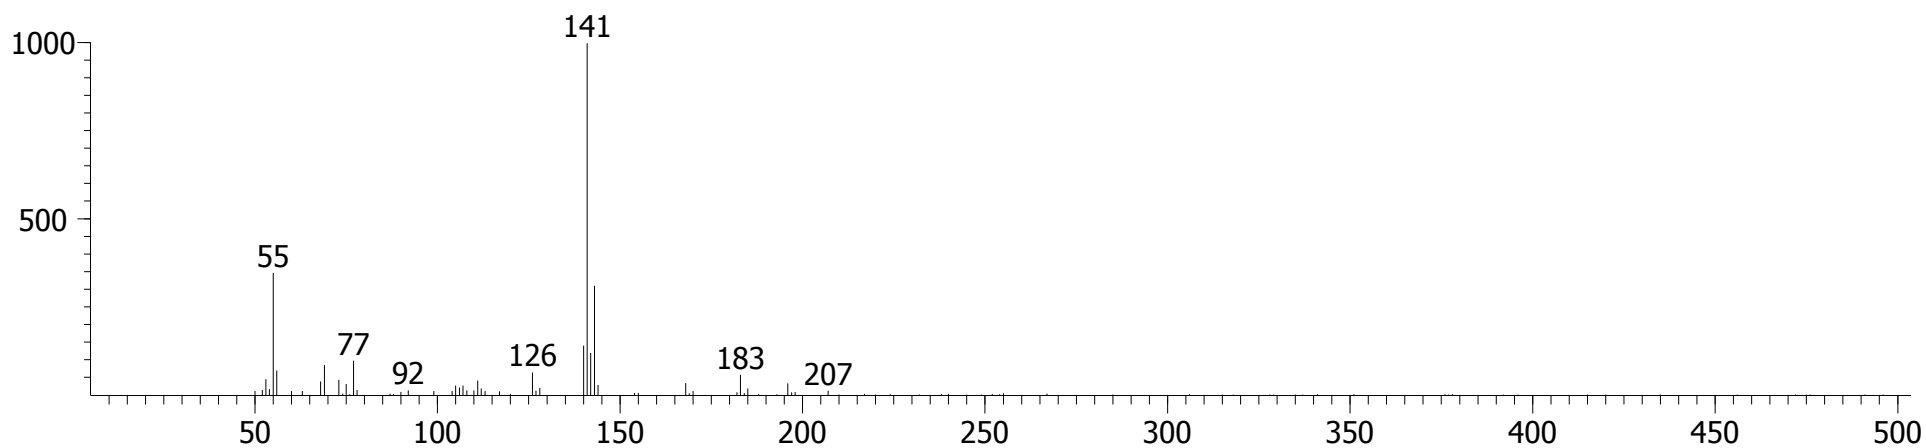

Library Hit - similarity 728, "3-Chloro-2,6-dimethylpyridine"

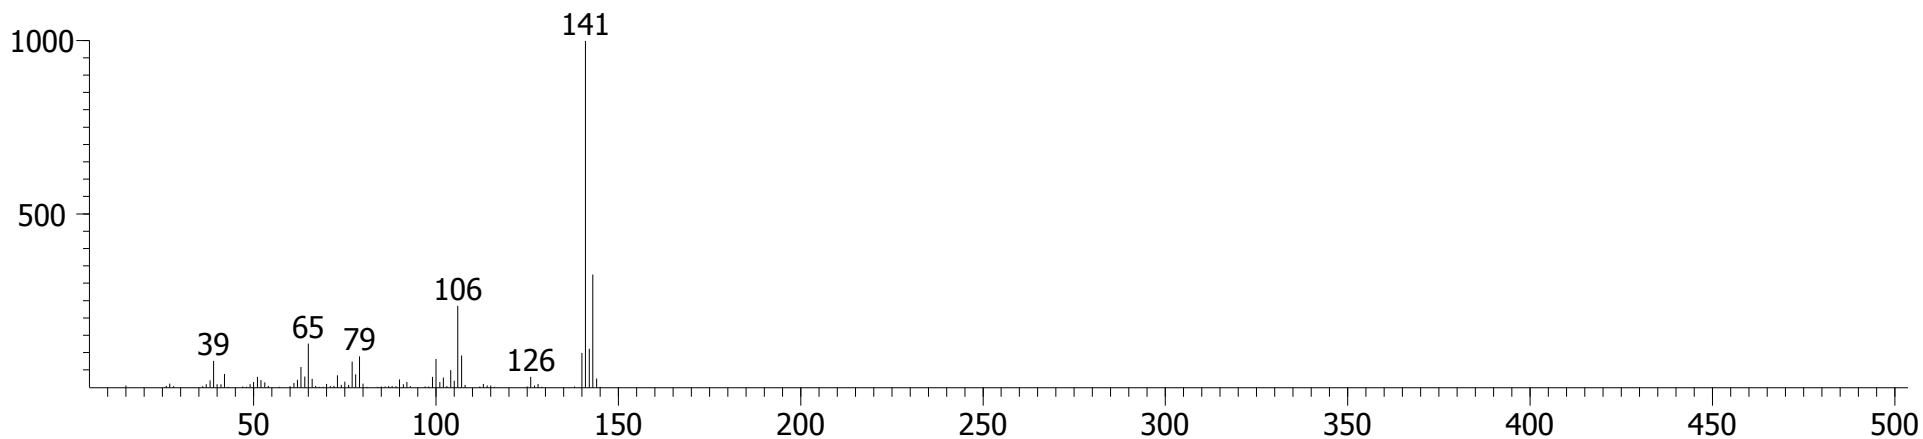

Sample 1, Fraction 1 (Hexane/DCM)

Pentanedioic acid, (2,4-di-t-butylphenyl)  
mono-ester

CAS # = 0-00-0  
1st Dimension R.T. = 1782.32  
2nd Dimension R.T. = 1.188  
Quant Mass(es) = 206  
S/N = 308.76  
Area = 14833  
Height = 2012.2

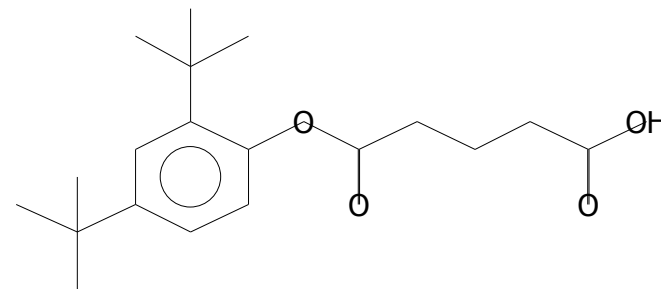

Peak True - sample "Lipid BM 1 F1:1", peak 2307, at 1782.32 , 1.188 sec , sec (Spec # 179320)

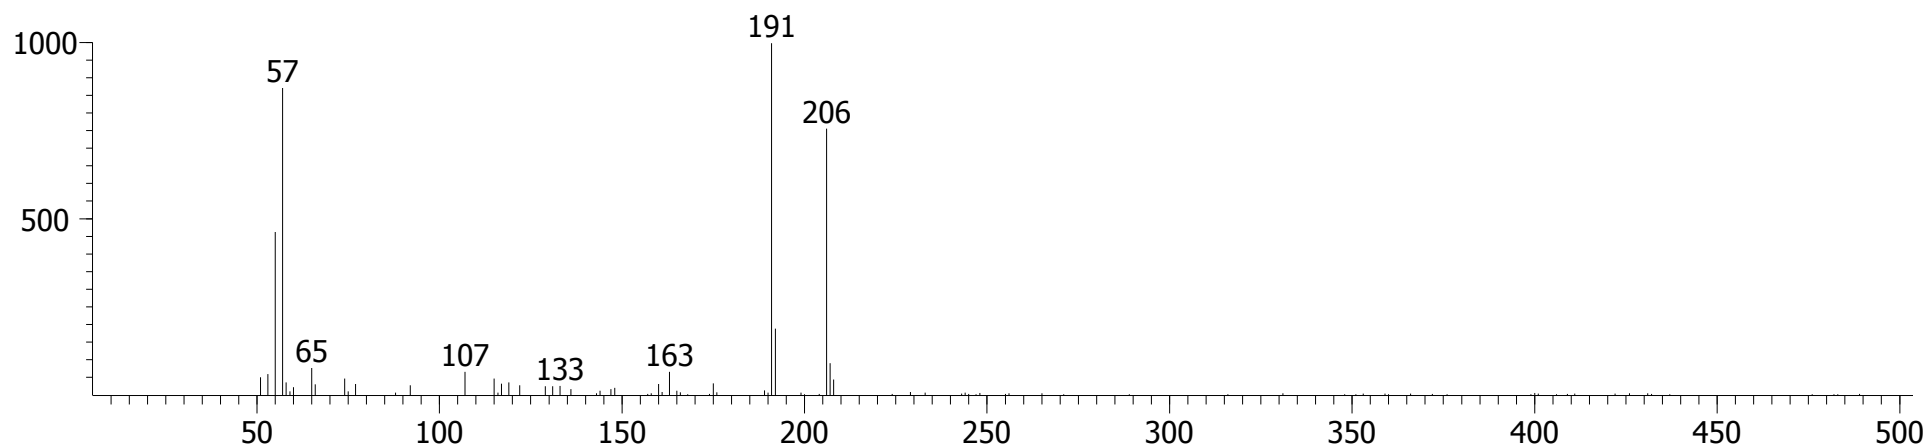

Library Hit - similarity 846, "Pentanedioic acid, (2,4-di-t-butylphenyl) mono-ester"

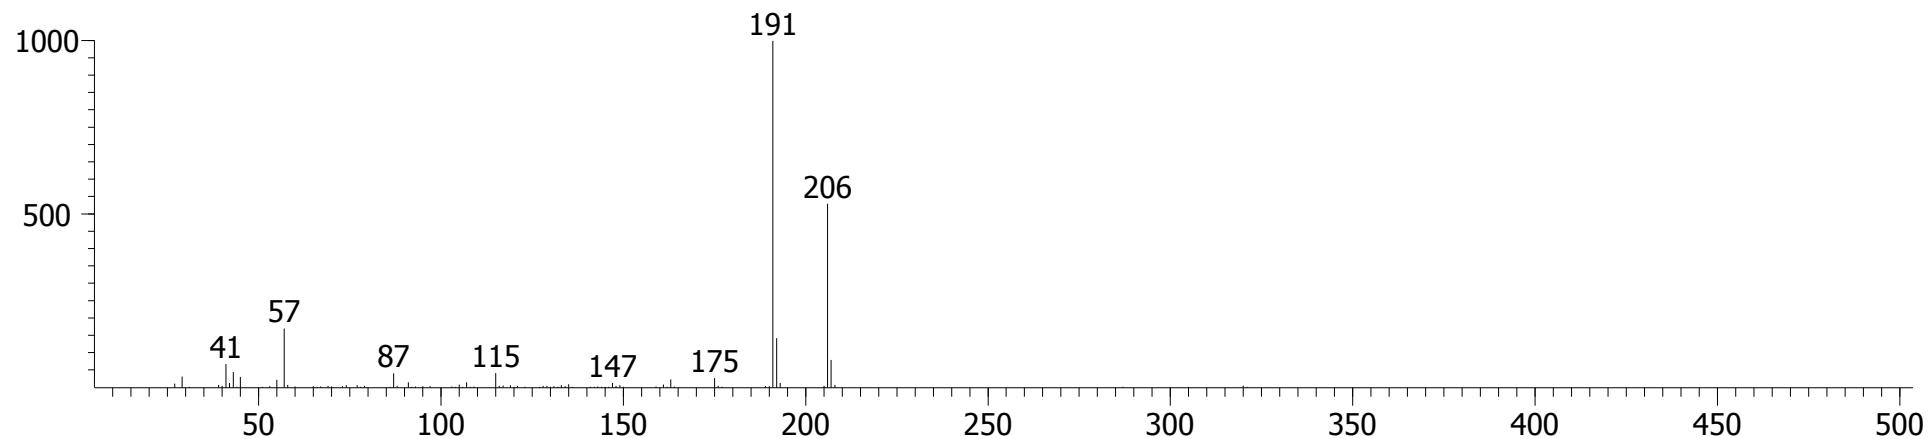

Sample 1, Fraction 2 (DCM)

Naphthalene,

1,2,3,4-tetrahydro-5-methyl-

CAS # = 2809-64-5

1st Dimension R.T. = 806.382

2nd Dimension R.T. = 0.931

Quant Mass(es) = 146

S/N = 171.67

Area = 8044.8

Height = 1489.9

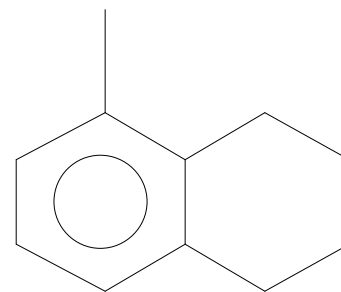

(5-Methyltetralin)

Peak True - sample "Lipid BM 1 F2:1", peak 348, at 806.382 , 0.931 sec , sec (Spec # 31411)

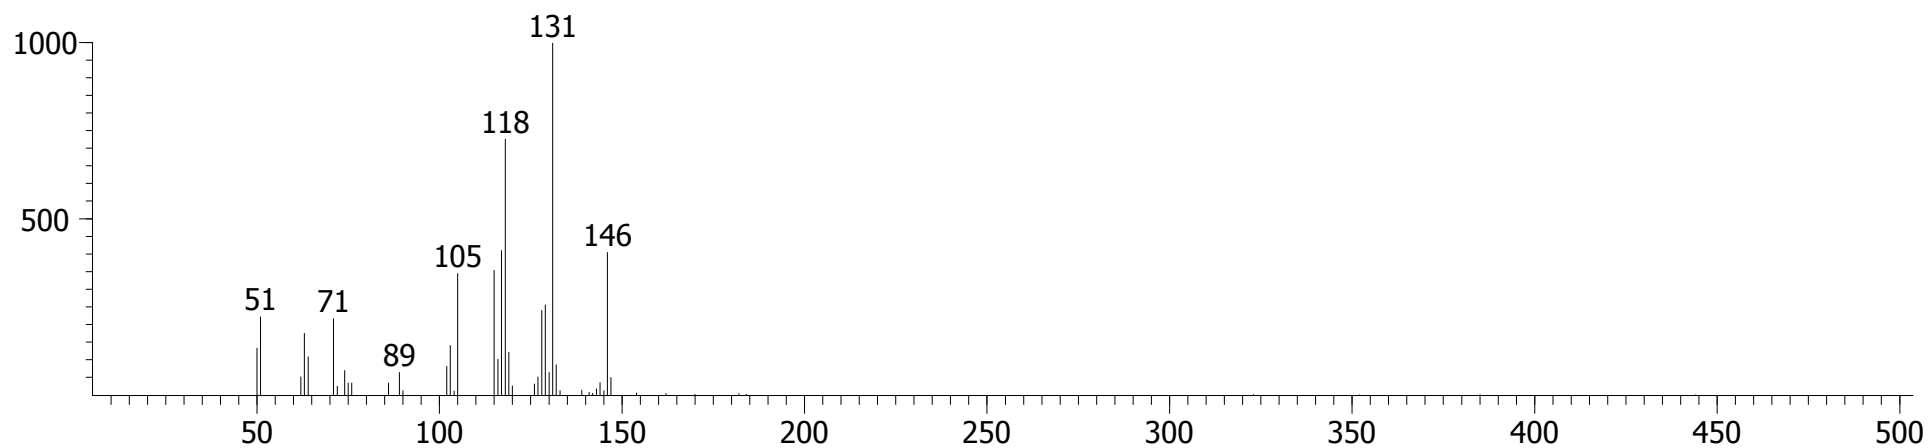

Library Hit - similarity 816, "Naphthalene, 1,2,3,4-tetrahydro-5-methyl-"

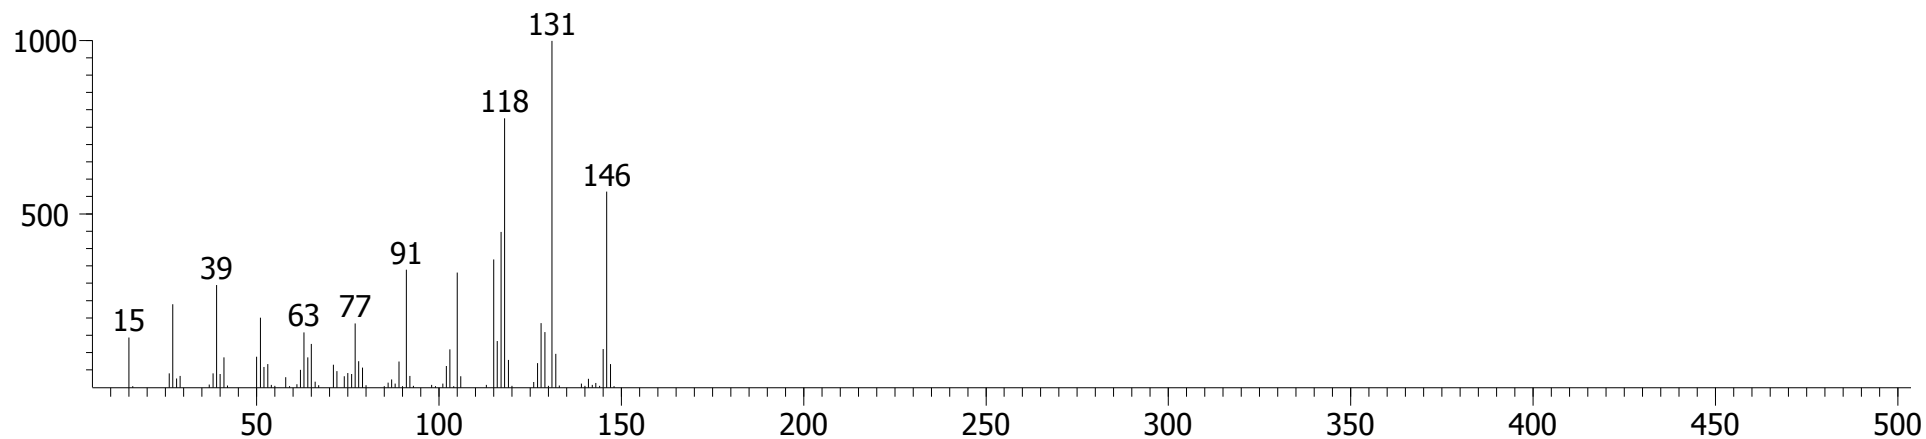

Sample 1, Fraction 2 (DCM)

Benzene, 1-chloro-4-(methylthio)-

CAS # = 123-09-1  
1st Dimension R.T. = 806.382  
2nd Dimension R.T. = 0.983  
Quant Mass(es) = 158  
S/N = 103.78  
Area = 5820.9  
Height = 1132.5

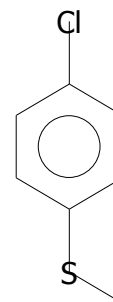

(4-Chlorothioanisole)

Peak True - sample "Lipid BM 1 F2:1", peak 349, at 806.382 , 0.983 sec , sec (Spec # 31419)

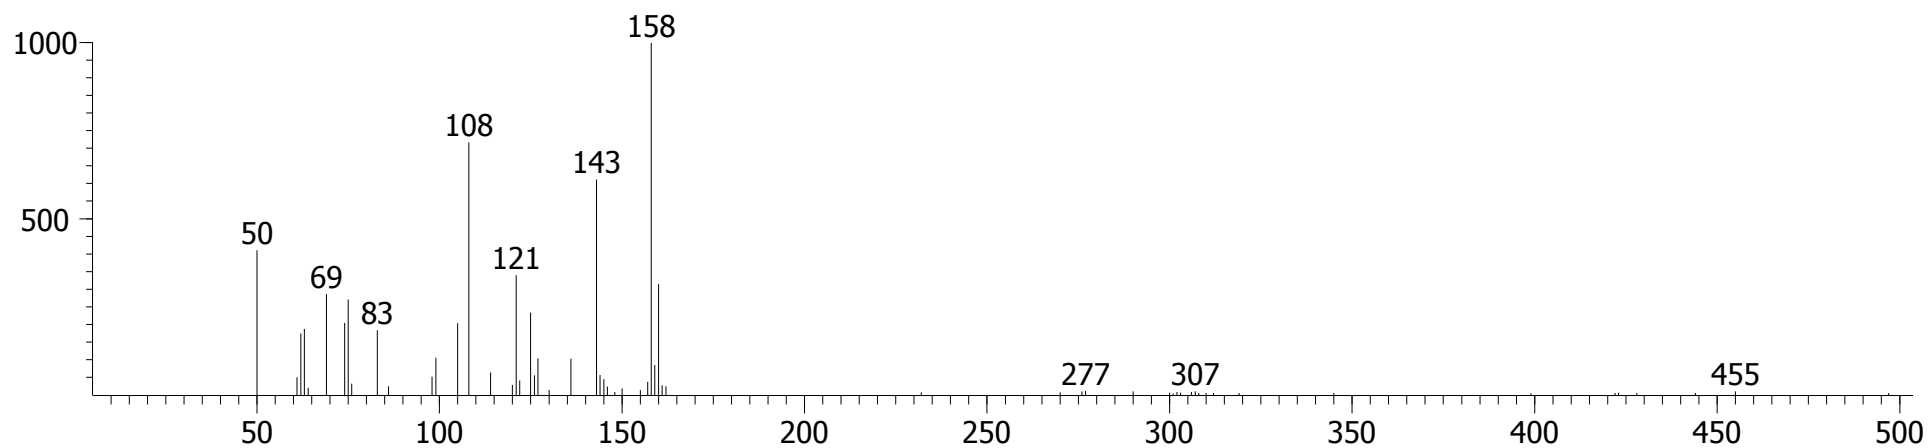

Library Hit - similarity 702, "Benzene, 1-chloro-4-(methylthio)-"

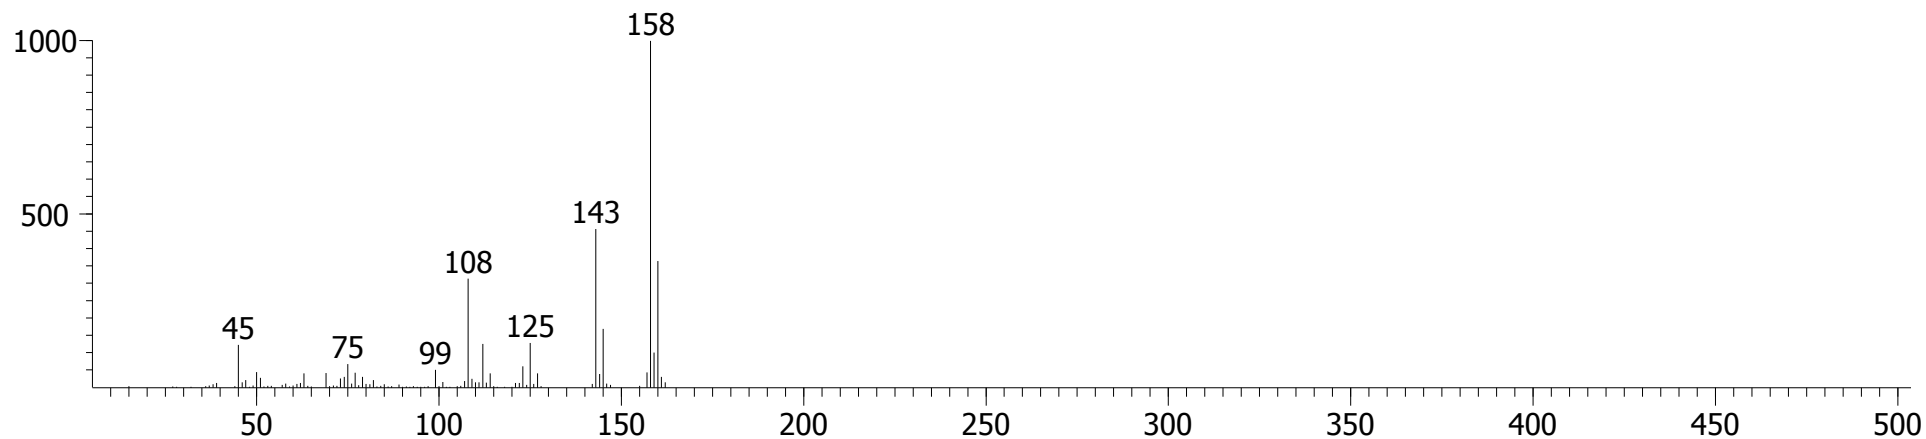

Sample 1, Fraction 2 (DCM)

Naphthalene,

1,2,3,4-tetrahydro-5-methyl-

CAS # = 2809-64-5

1st Dimension R.T. = 830.868

2nd Dimension R.T. = 0.950

Quant Mass(es) = 146

S/N = 115.28

Area = 5205.6

Height = 1029.1

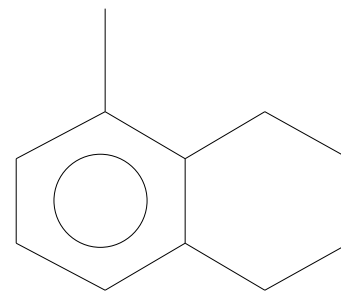

(5-Methyltetralin)

Peak True - sample "Lipid BM 1 F2:1", peak 399, at 830.868 , 0.950 sec , sec (Spec # 35124)

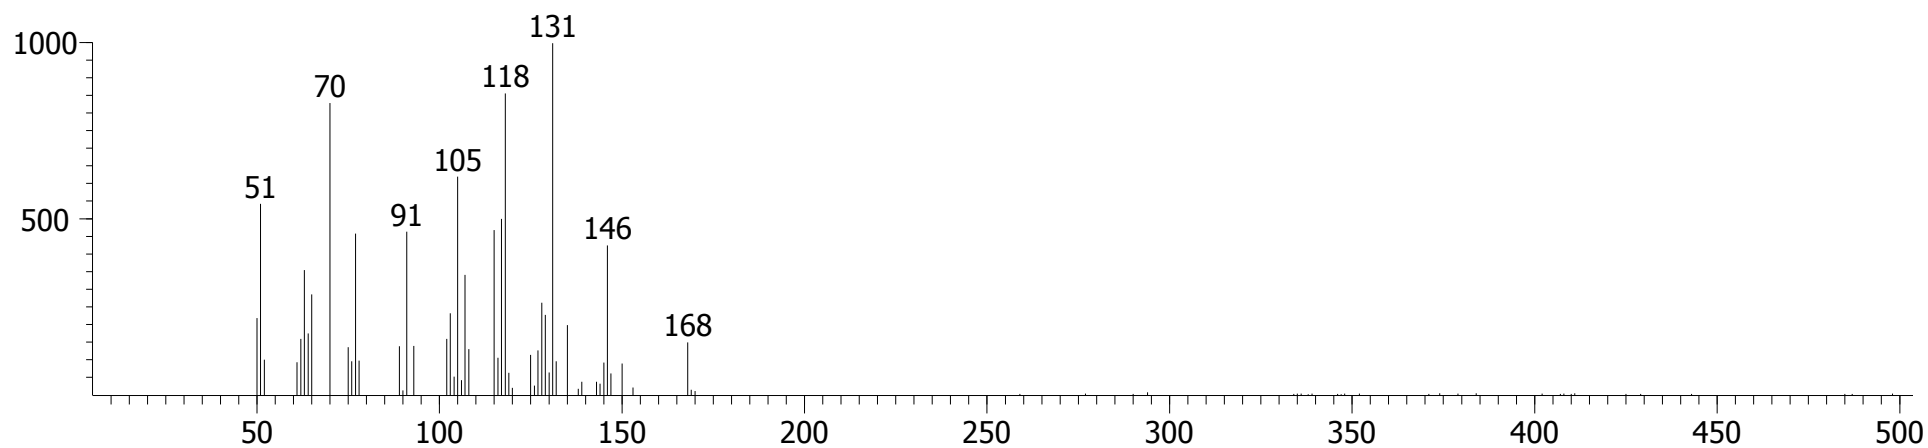

Library Hit - similarity 754, "Naphthalene, 1,2,3,4-tetrahydro-5-methyl-"

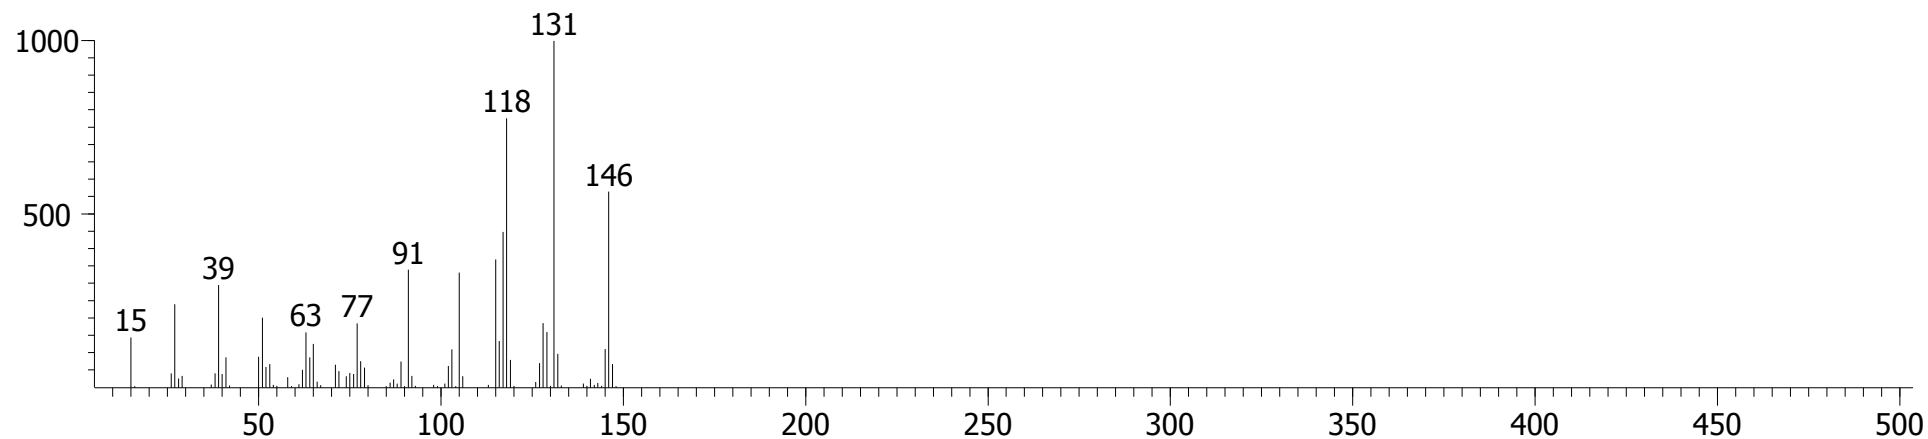

# Sample 1, Fraction 2 (DCM)

## Hex-1-enylbenzene

CAS # = 828-15-9

1st Dimension R.T. = 848.358

2nd Dimension R.T. = 0.911

Quant Mass(es) = 160

S/N = 175.88

Area = 11299

Height = 1906.9

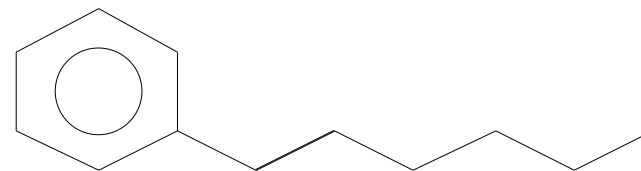

Peak True - sample "Lipid BM 1 F2:1", peak 422, at 848.358 , 0.911 sec , sec (Spec # 37768)

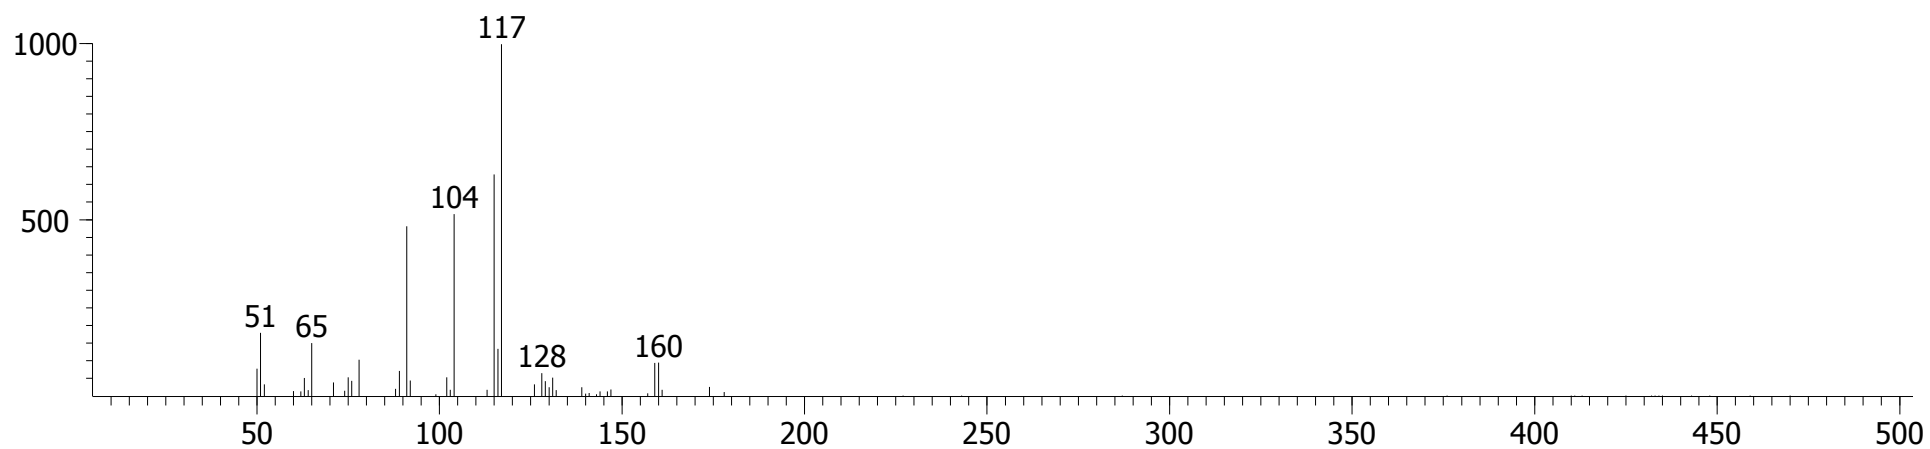

Library Hit - similarity 744, "Hex-1-enylbenzene"

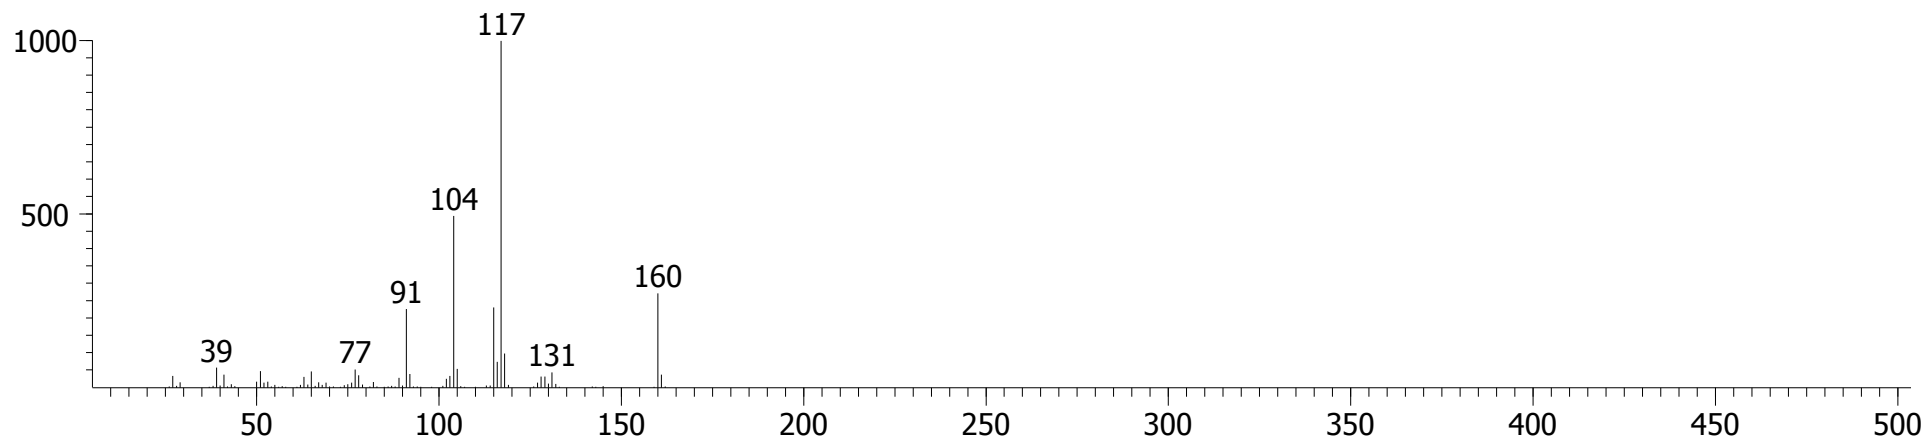

# Sample 1, Fraction 2 (DCM)

## Naphthalene,

### 1,2,3,4-tetrahydro-2,7-dimethyl-

CAS # = 13065-07-1

1st Dimension R.T. = 848.358

2nd Dimension R.T. = 0.924

Quant Mass(es) = 160

S/N = 256.37

Area = 11299

Height = 1906.9

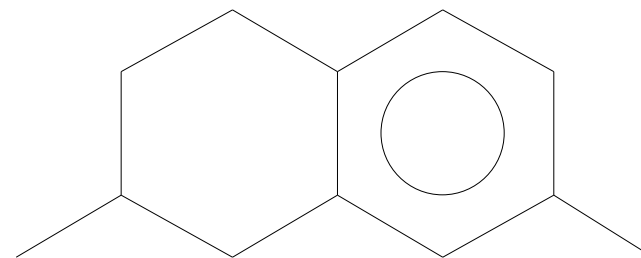

Peak True - sample "Lipid BM 1 F2:1", peak 423, at 848.358 , 0.924 sec , sec (Spec # 37770)

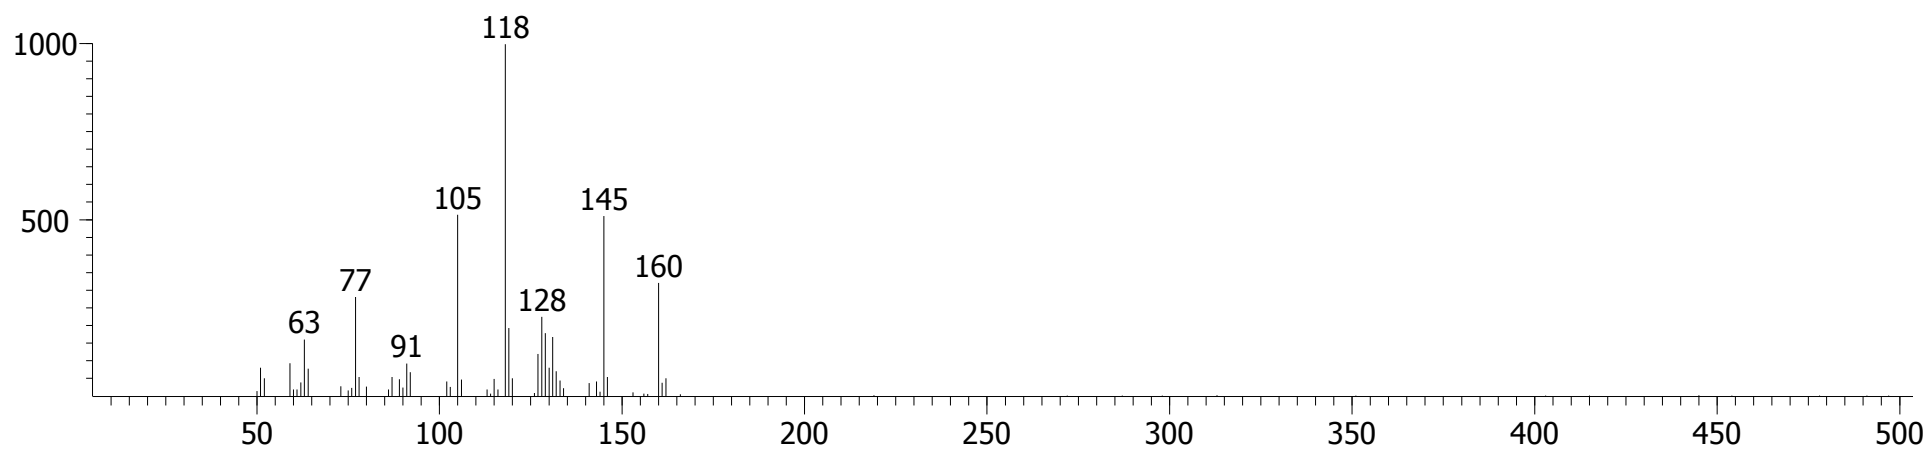

Library Hit - similarity 798, "Naphthalene, 1,2,3,4-tetrahydro-2,7-dimethyl-"

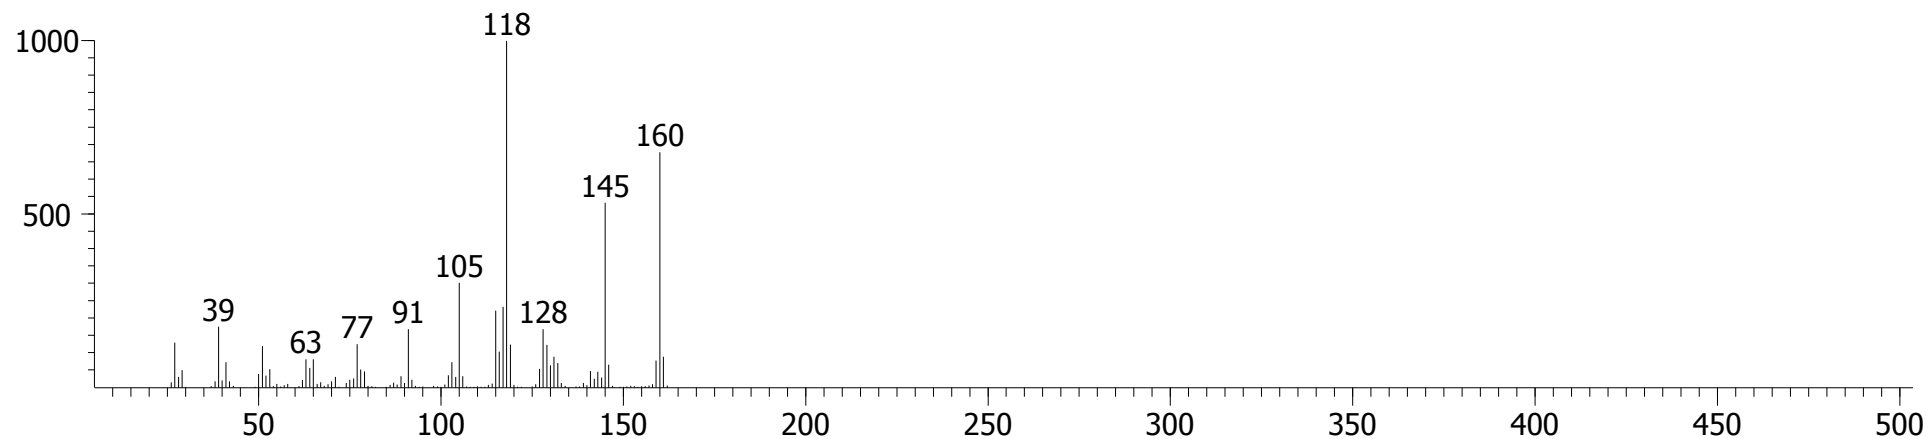

Sample 1, Fraction 2 (DCM)

Benzaldehyde, 4-ethoxy-

CAS # = 10031-82-0  
1st Dimension R.T. = 855.354  
2nd Dimension R.T. = 0.997  
Quant Mass(es) = 150  
S/N = 77.056  
Area = 2464.3  
Height = 413.05

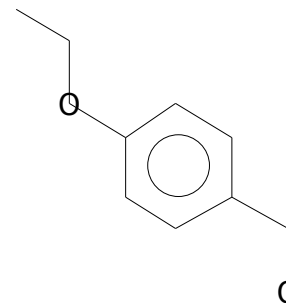

Peak True - sample "Lipid BM 1 F2:1", peak 438, at 855.354 , 0.997 sec , sec (Spec # 38841)

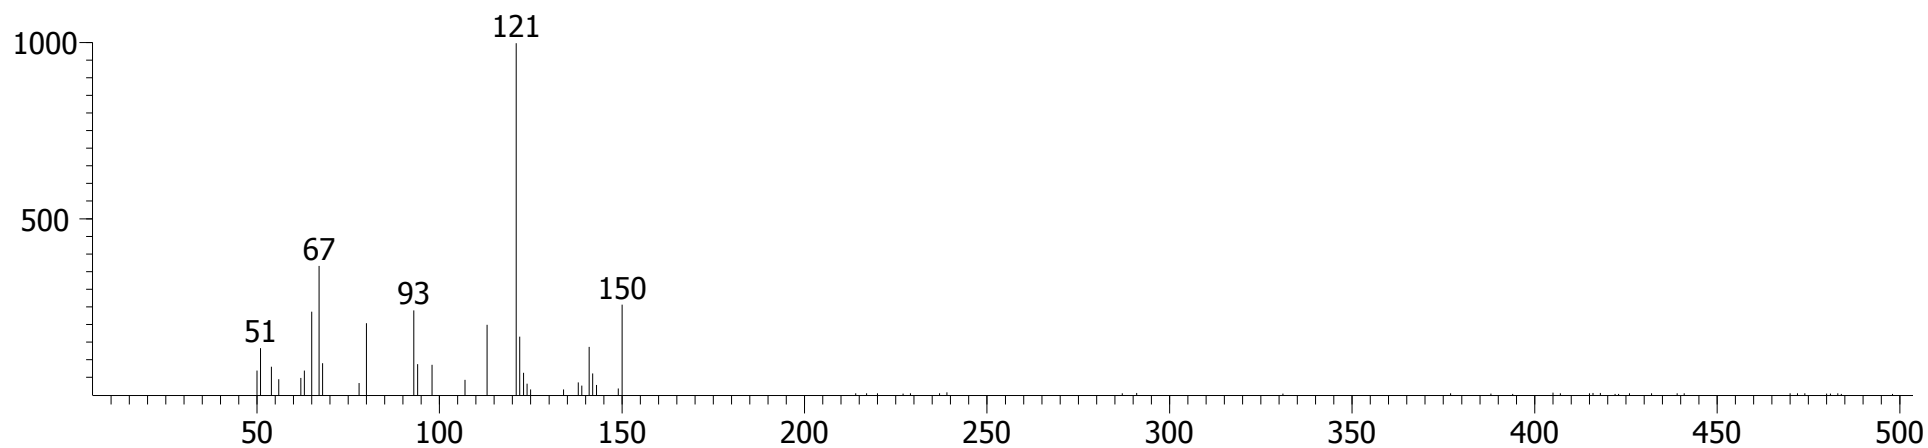

Library Hit - similarity 672, "Benzaldehyde, 4-ethoxy-"

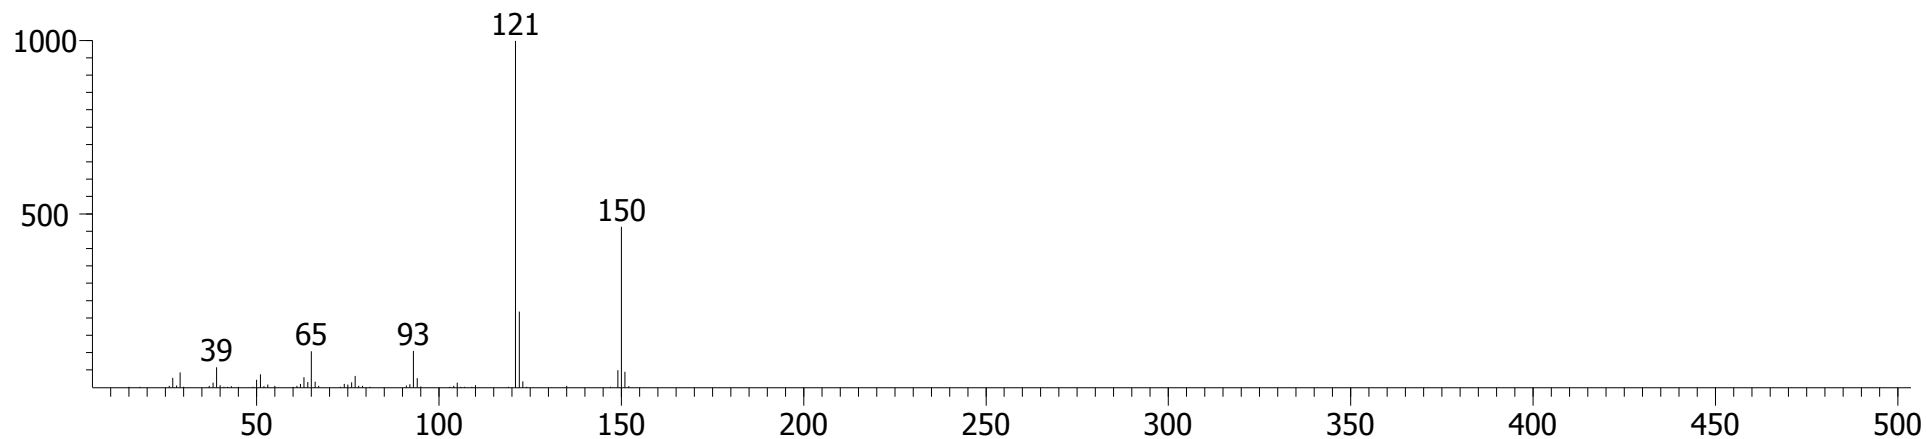



# Sample 1, Fraction 2 (DCM)

## Biphenyl

CAS # = 92-52-4  
1st Dimension R.T. = 897.33  
2nd Dimension R.T. = 0.997  
Quant Mass(es) = 154  
S/N = 436.58  
Area = 49241  
Height = 8591.0

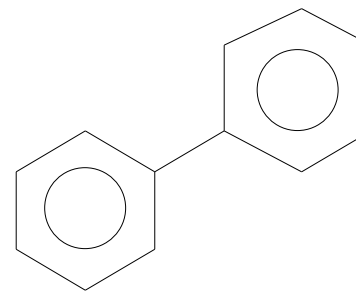

Peak True - sample "Lipid BM 1 F2:1", peak 528, at 897.33 , 0.997 sec , sec (Spec # 45201)

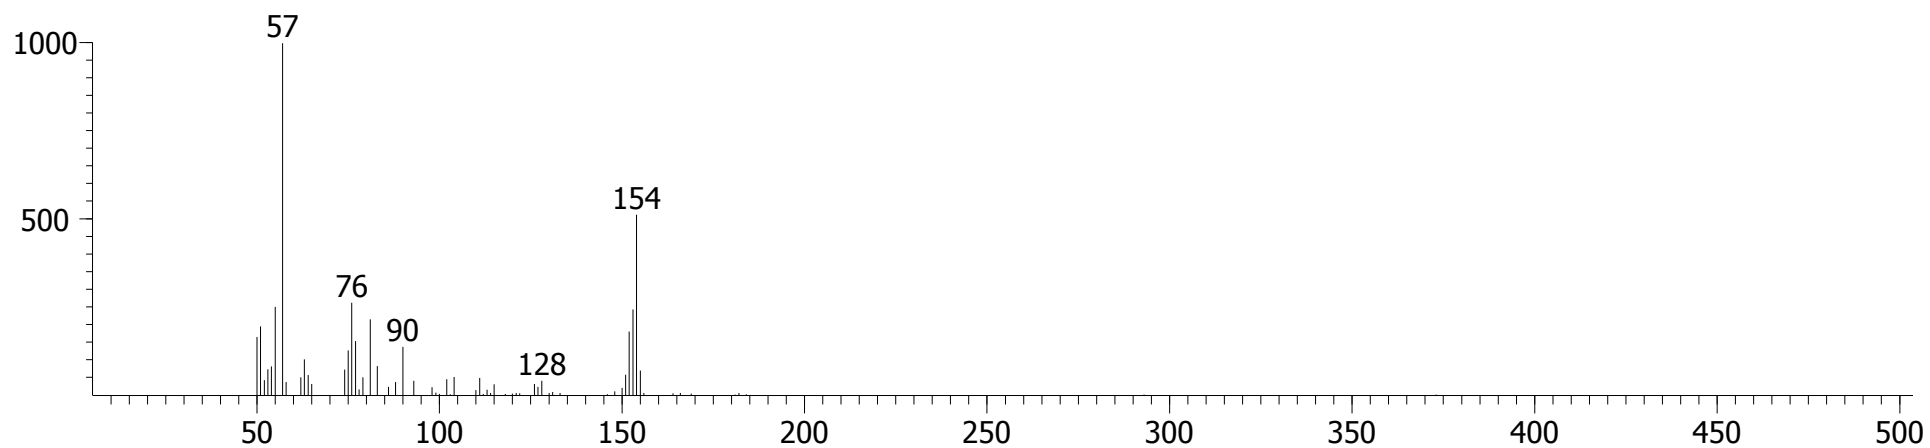

Library Hit - similarity 760, "Biphenyl"

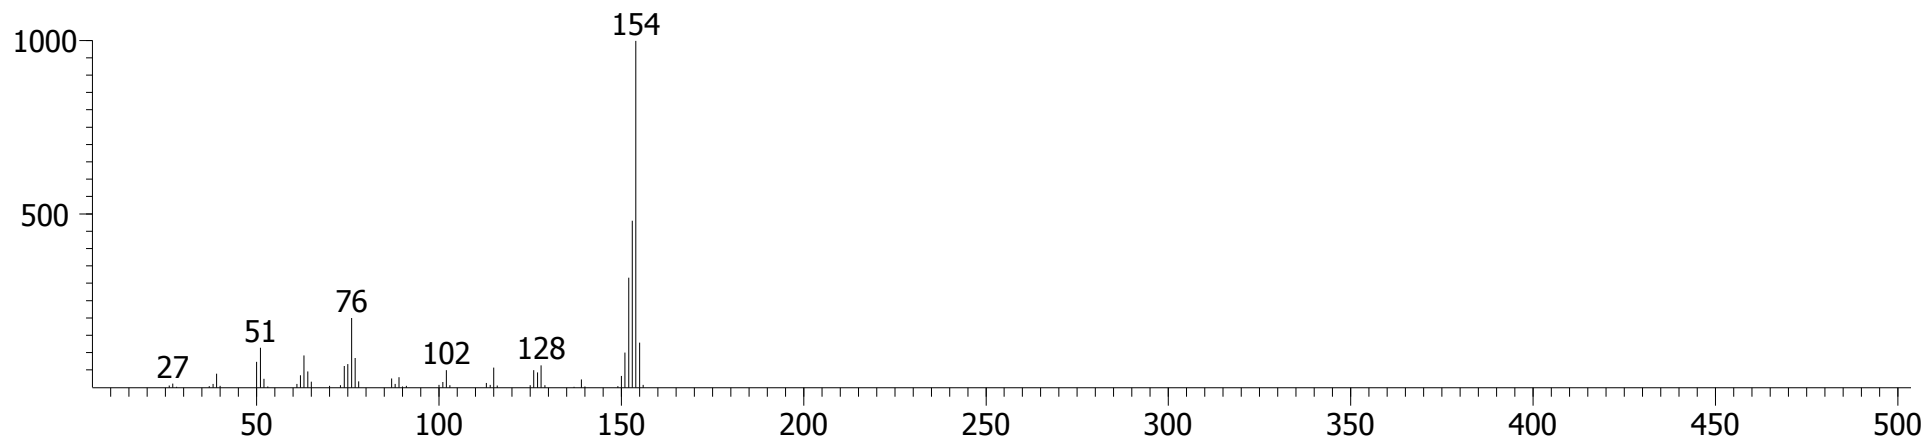

# Sample 1, Fraction 2 (DCM)

## Naphthalene,

### 1,2,3,4-tetrahydro-1,4-dimethyl-

CAS # = 4175-54-6

1st Dimension R.T. = 907.824

2nd Dimension R.T. = 0.950

Quant Mass(es) = 160

S/N = 404.35

Area = 9599.4

Height = 1791.6



Peak True - sample "Lipid BM 1 F2:1", peak 546, at 907.824 , 0.950 sec , sec (Spec # 46784)

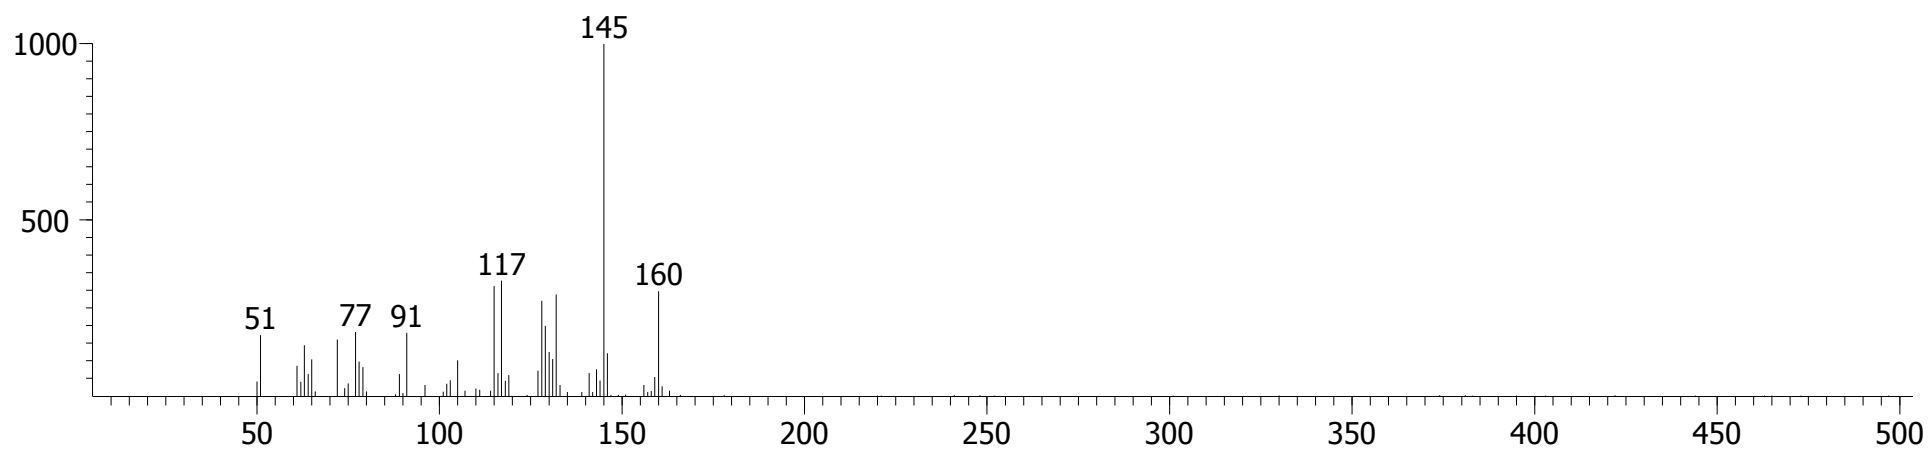

Library Hit - similarity 839, "Naphthalene, 1,2,3,4-tetrahydro-1,4-dimethyl-"



# Sample 1, Fraction 2 (DCM)

## Vanillin

CAS # = 121-33-5  
1st Dimension R.T. = 911.322  
2nd Dimension R.T. = 1.056  
Quant Mass(es) = 151  
S/N = 273.18  
Area = 23217  
Height = 3514.0

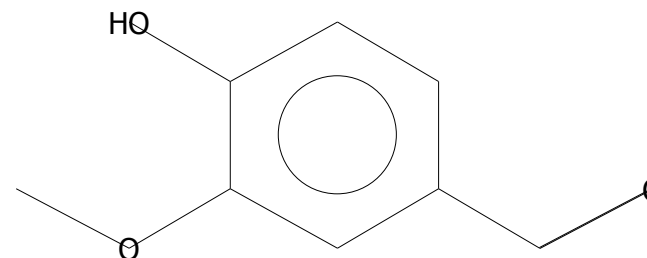

Peak True - sample "Lipid BM 1 F2:1", peak 554, at 911.322 , 1.056 sec , sec (Spec # 47330)

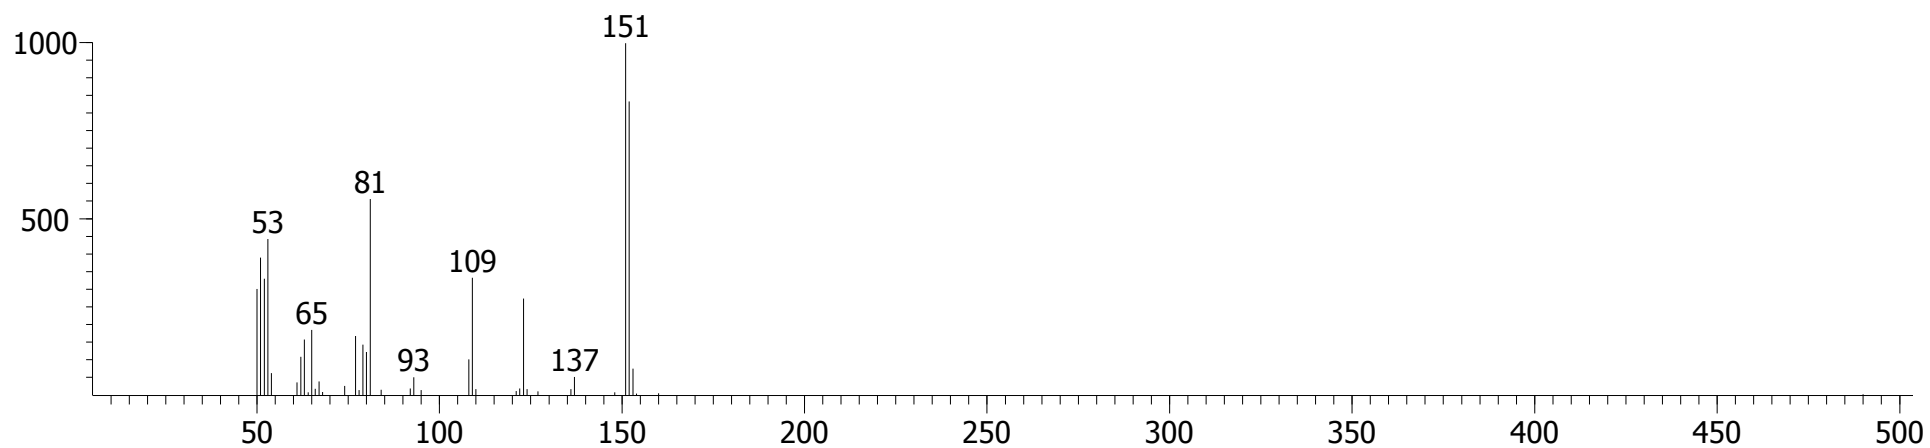

Library Hit - similarity 931, "Vanillin"

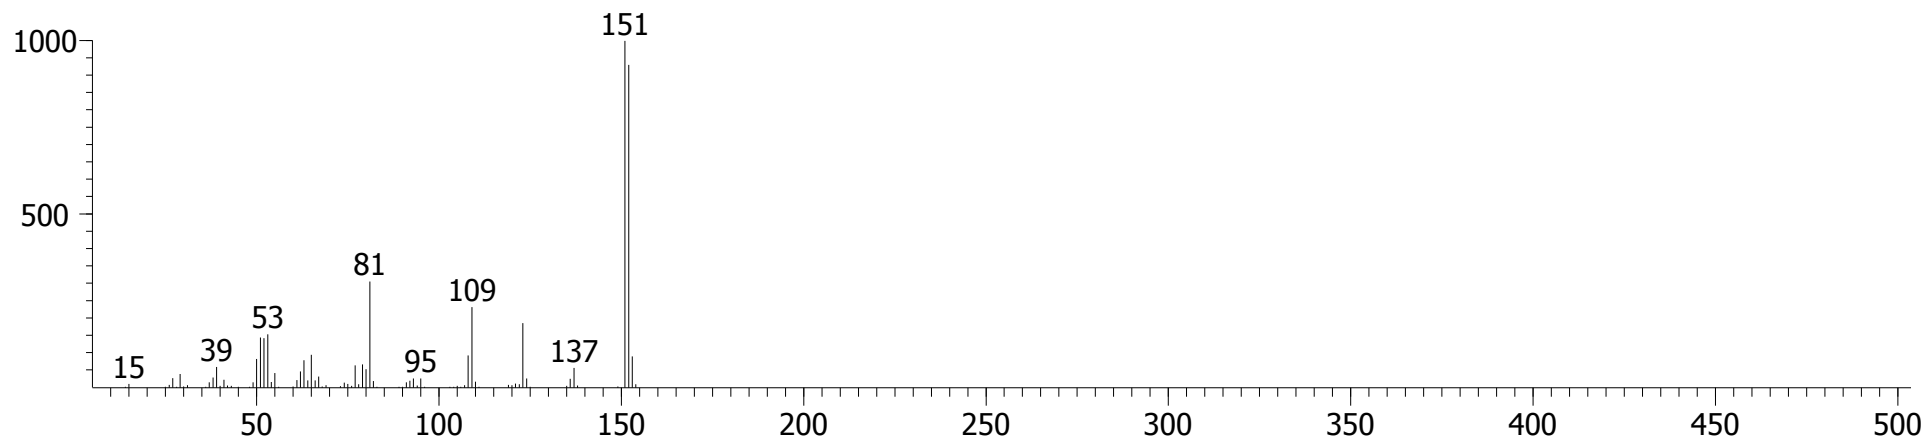

Sample 1, Fraction 2 (DCM)

Naphthalene, 1,7-dimethyl-

CAS # = 575-37-1  
1st Dimension R.T. = 921.816  
2nd Dimension R.T. = 0.977  
Quant Mass(es) = 156  
S/N = 148.35  
Area = 15871  
Height = 2734.0

1,7-Dimethylnaphthalene

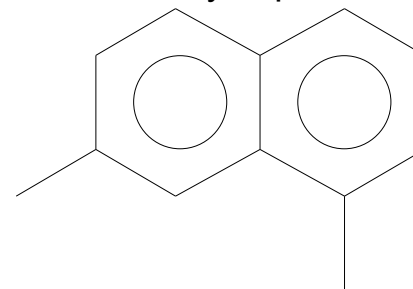

Peak True - sample "Lipid BM 1 F2:1", peak 567, at 921.816 , 0.977 sec , sec (Spec # 48908)

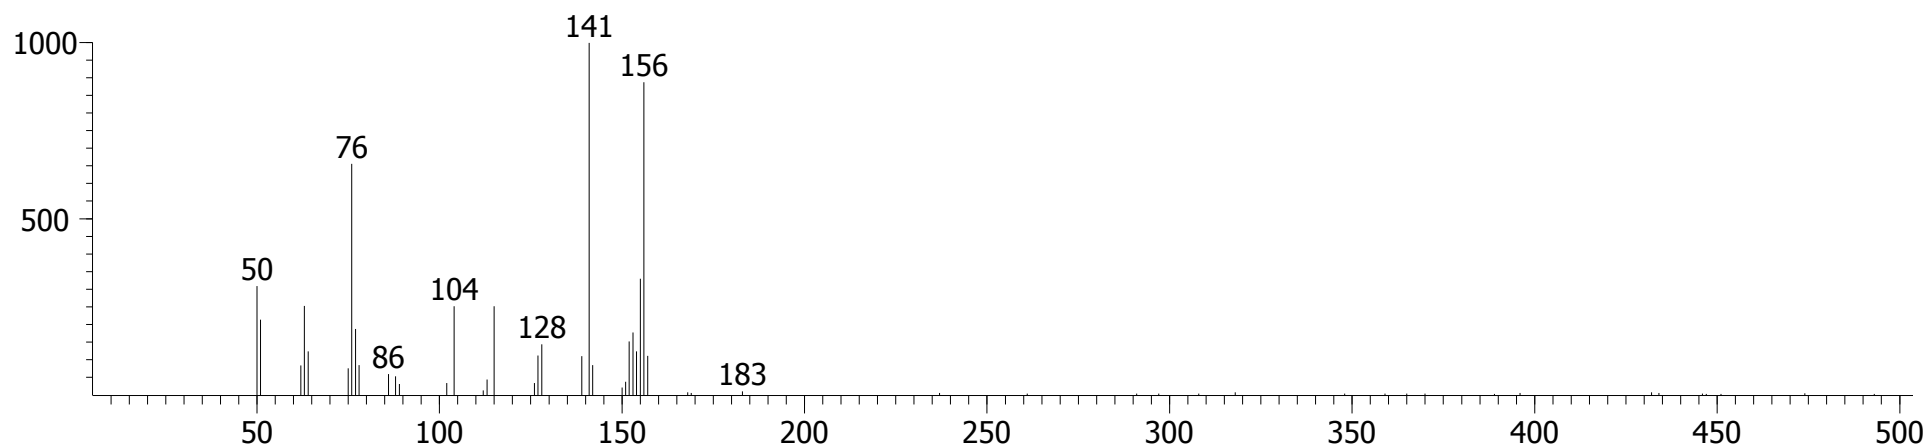

Library Hit - similarity 874, "Naphthalene, 1,7-dimethyl-"



# Sample 1, Fraction 2 (DCM)

## Benzene, 1-heptenyl-

CAS # = 829-99-2  
1st Dimension R.T. = 928.812  
2nd Dimension R.T. = 0.911  
Quant Mass(es) = 174  
S/N = 738.51  
Area = 21476  
Height = 3368.4

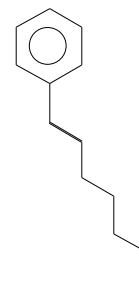

Peak True - sample "Lipid BM 1 F2:1", peak 578, at 928.812 , 0.911 sec , sec (Spec # 49958)

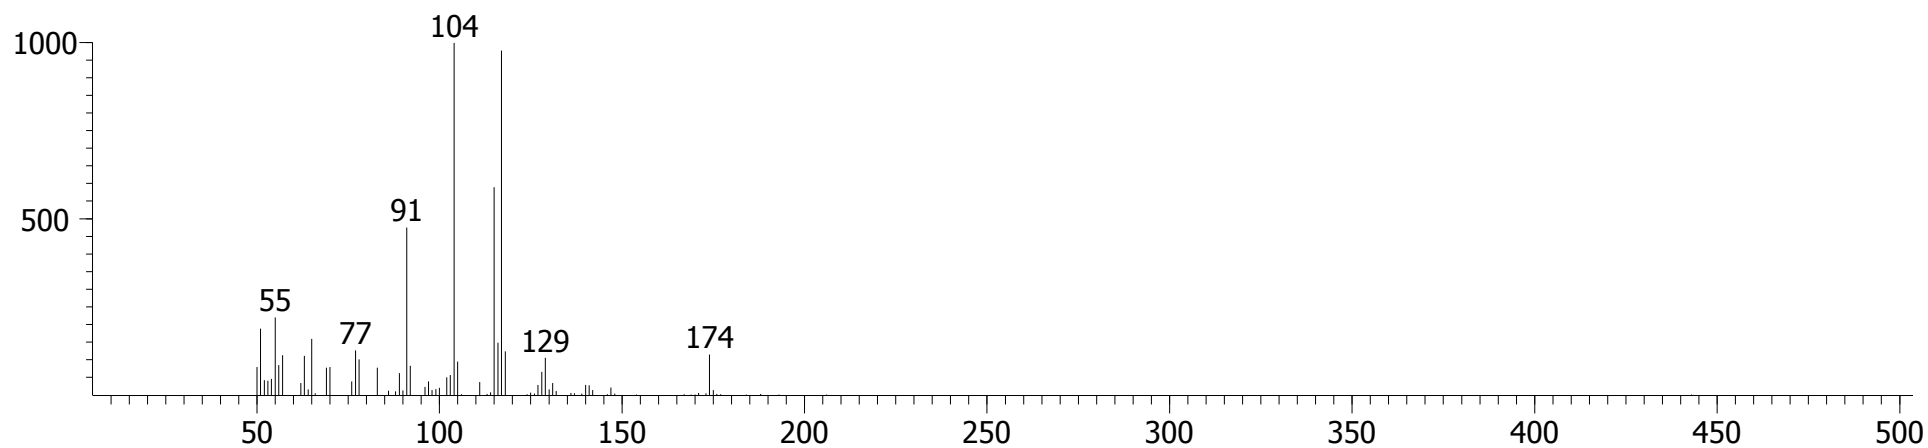

Library Hit - similarity 850, "Benzene, 1-heptenyl-"

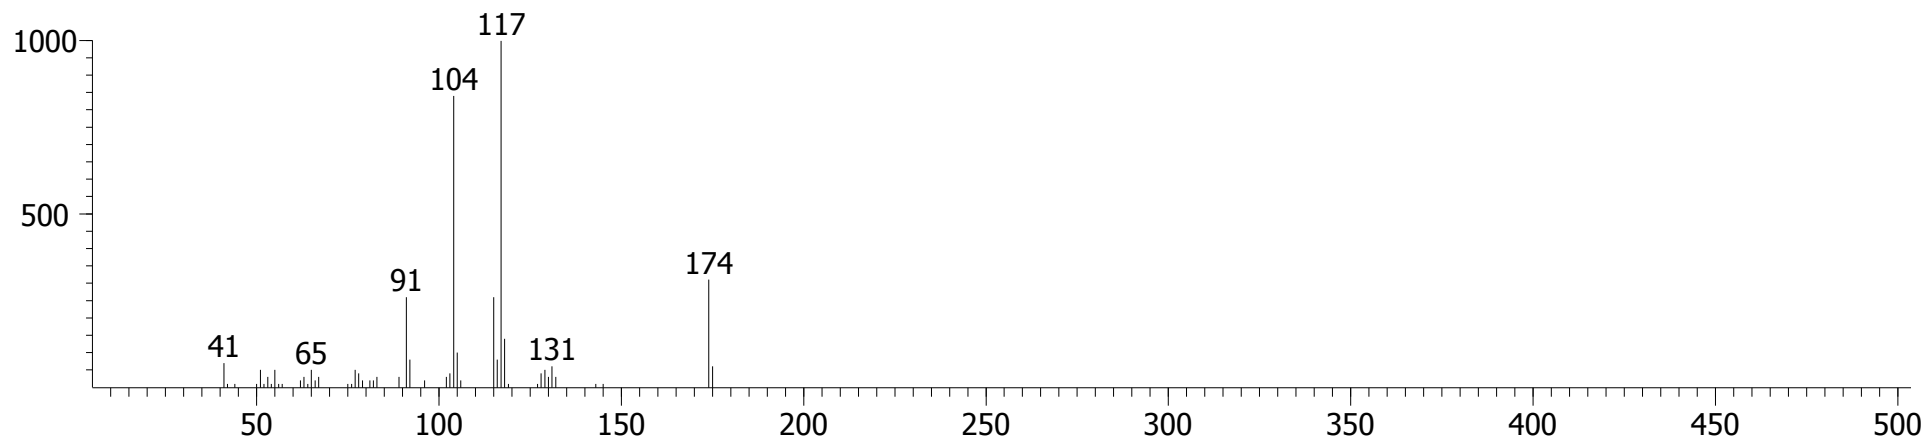

Sample 1, Fraction 2 (DCM)

Naphthalene, 1,7-dimethyl-

CAS # = 575-37-1  
1st Dimension R.T. = 932.31  
2nd Dimension R.T. = 0.990  
Quant Mass(es) = 156  
S/N = 302.22  
Area = 32148  
Height = 5934.5

1,7-Dimethylnaphthalene



Peak True - sample "Lipid BM 1 F2:1", peak 584, at 932.31 , 0.990 sec , sec (Spec # 50500)

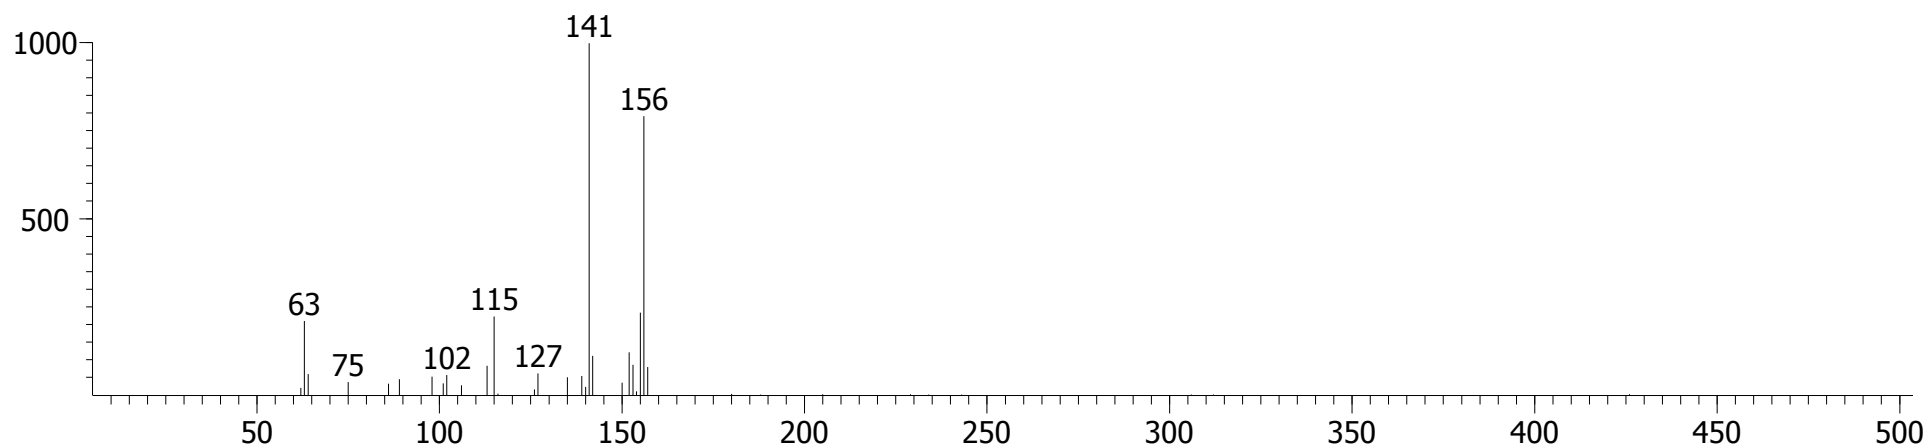

Library Hit - similarity 816, "Naphthalene, 1,7-dimethyl-"



Sample 1, Fraction 2 (DCM)

Ethanone, 1,1'-(1,3-phenylene)bis-

(1,3-Diacetylbenzene)

CAS # = 6781-42-6  
1st Dimension R.T. = 935.808  
2nd Dimension R.T. = 1.043  
Quant Mass(es) = 162  
S/N = 1643.6  
Area = 43823  
Height = 7099.8

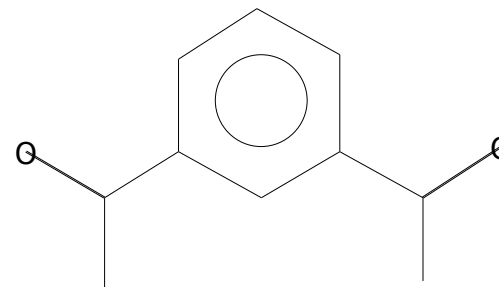

Peak True - sample "Lipid BM 1 F2:1", peak 591, at 935.808 , 1.043 sec , sec (Spec # 51038)

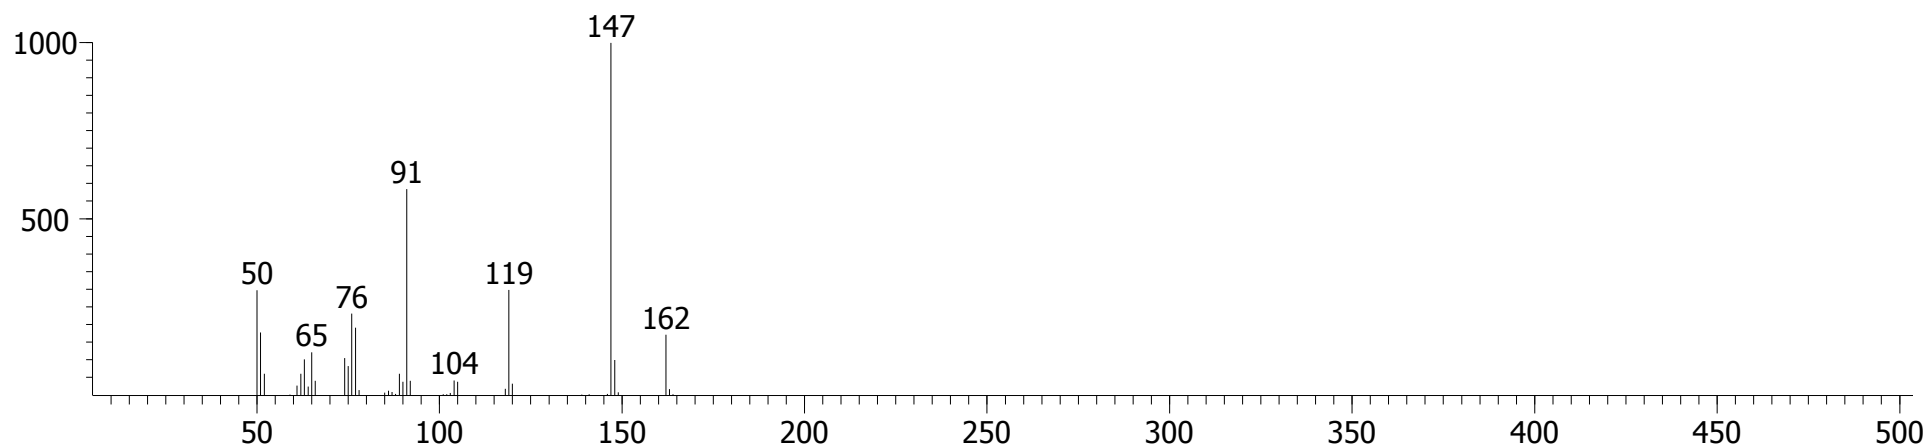

Library Hit - similarity 958, "Ethanone, 1,1'-(1,3-phenylene)bis-"

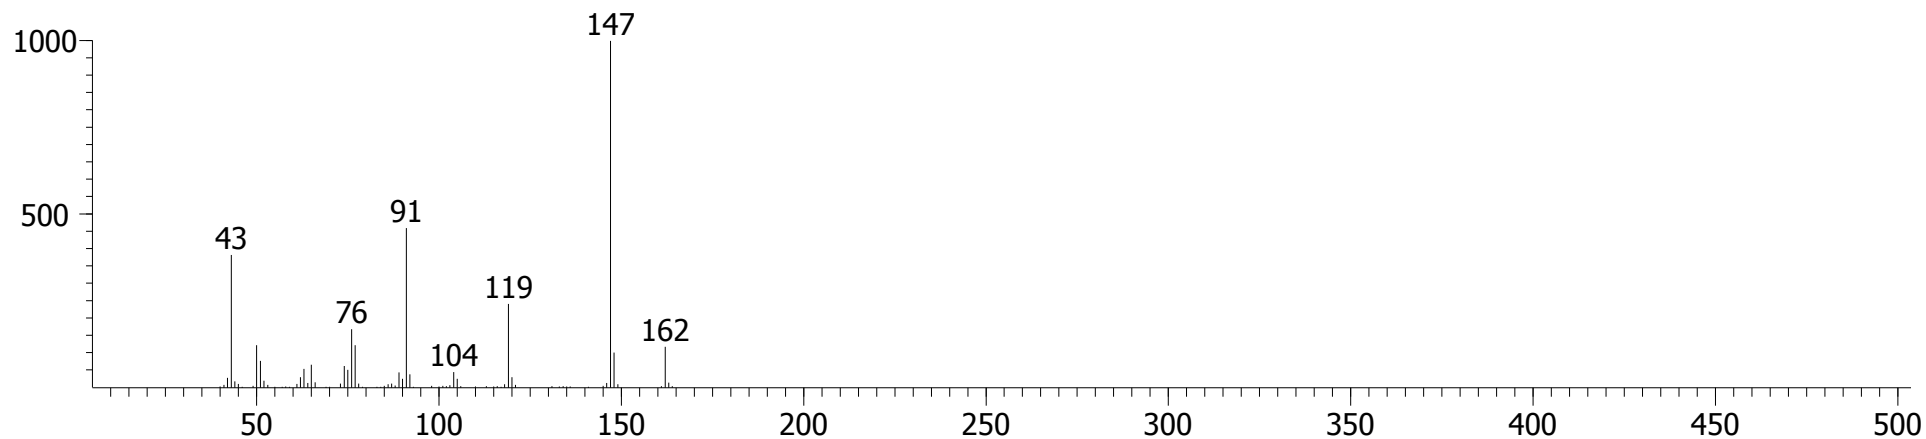

Sample 1, Fraction 2 (DCM)

Naphthalene, 1-ethyl-

CAS # = 1127-76-0  
1st Dimension R.T. = 949.8  
2nd Dimension R.T. = 1.003  
Quant Mass(es) = 156  
S/N = 85.653  
Area = 5787.6  
Height = 914.60



Peak True - sample "Lipid BM 1 F2:1", peak 617, at 949.8 , 1.003 sec , sec (Spec # 53152)

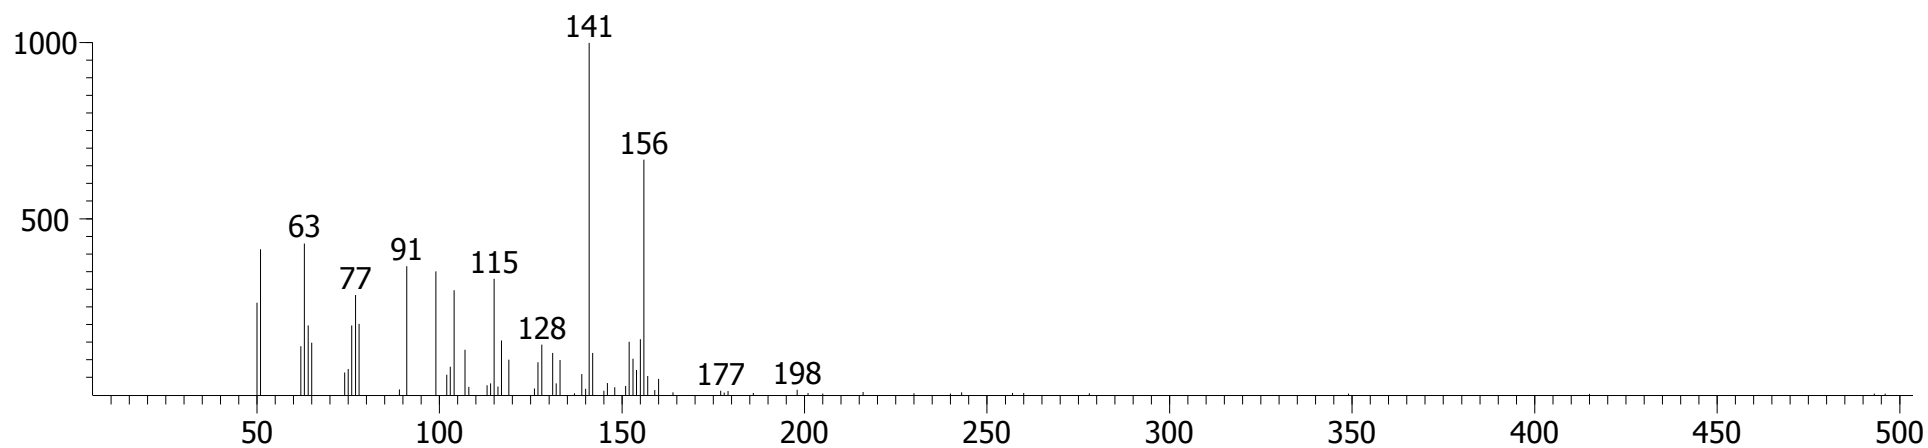

Library Hit - similarity 726, "Naphthalene, 1-ethyl-"





Sample 1, Fraction 2 (DCM)

o-Cyanobenzoic acid

CAS # = 3839-22-3  
1st Dimension R.T. = 960.294  
2nd Dimension R.T. = 1.115  
Quant Mass(es) = 147  
S/N = 262.51  
Area = 18752  
Height = 2881.1

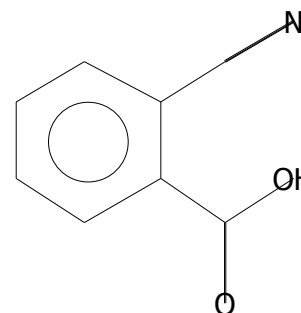

(2-Cyanobenzoic acid)

Peak True - sample "Lipid BM 1 F2:1", peak 635, at 960.294 , 1.115 sec , sec (Spec # 54759)

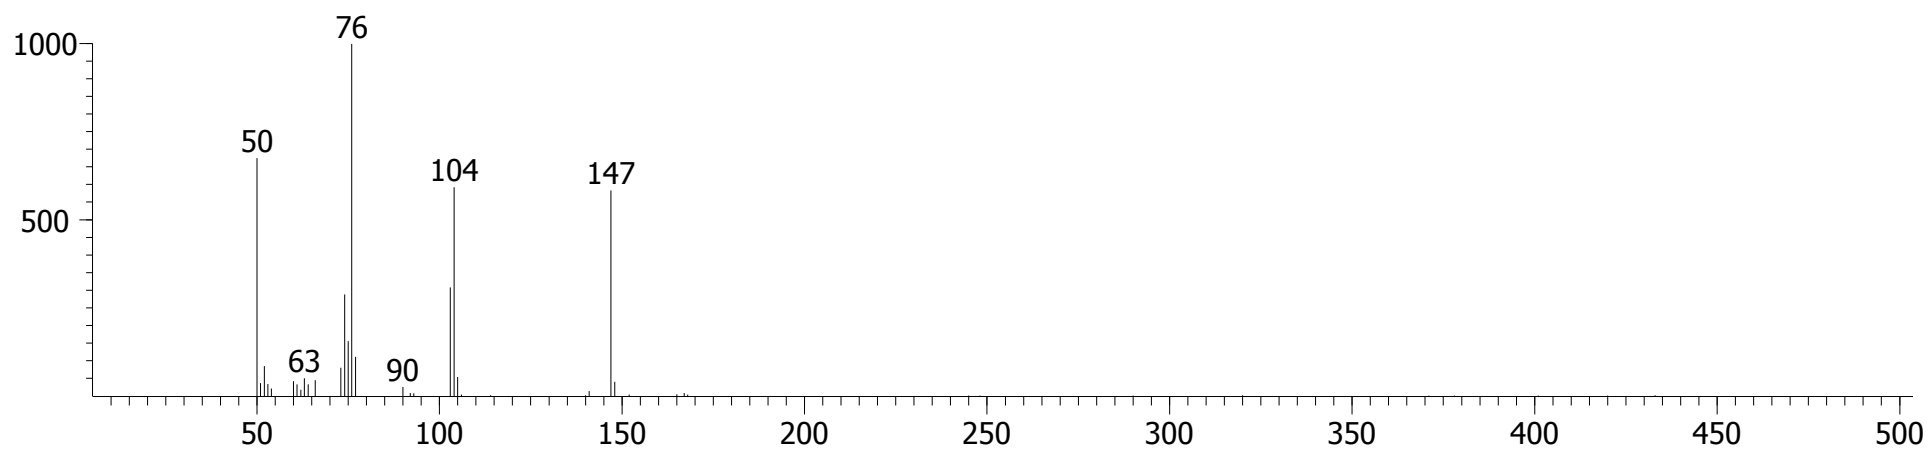

Library Hit - similarity 917, "o-Cyanobenzoic acid"

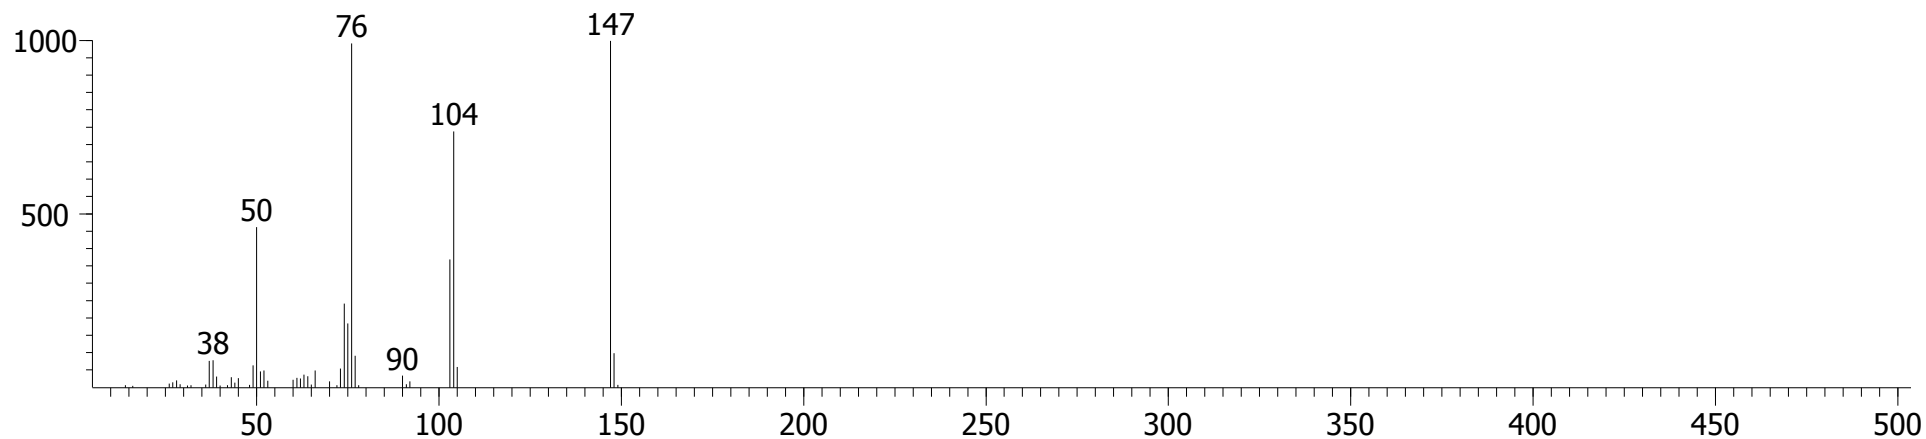

Sample 1, Fraction 2 (DCM)

Benzoic acid, 4-ethoxy-, ethyl ester

CAS # = 23676-09-7  
1st Dimension R.T. = 995.274  
2nd Dimension R.T. = 0.977  
Quant Mass(es) = 194  
S/N = 2011.1  
Area = 142068  
Height = 23054

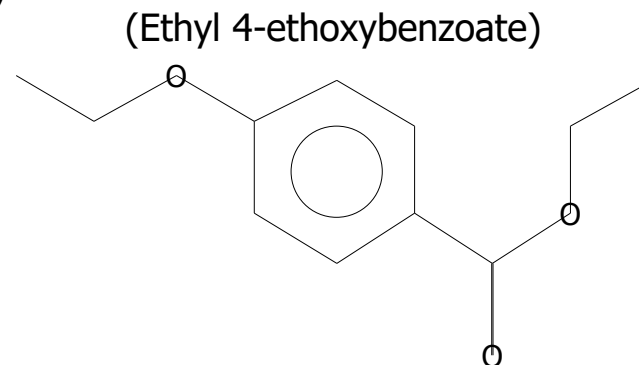

Peak True - sample "Lipid BM 1 F2:1", peak 691, at 995.274 , 0.977 sec , sec (Spec # 60038)

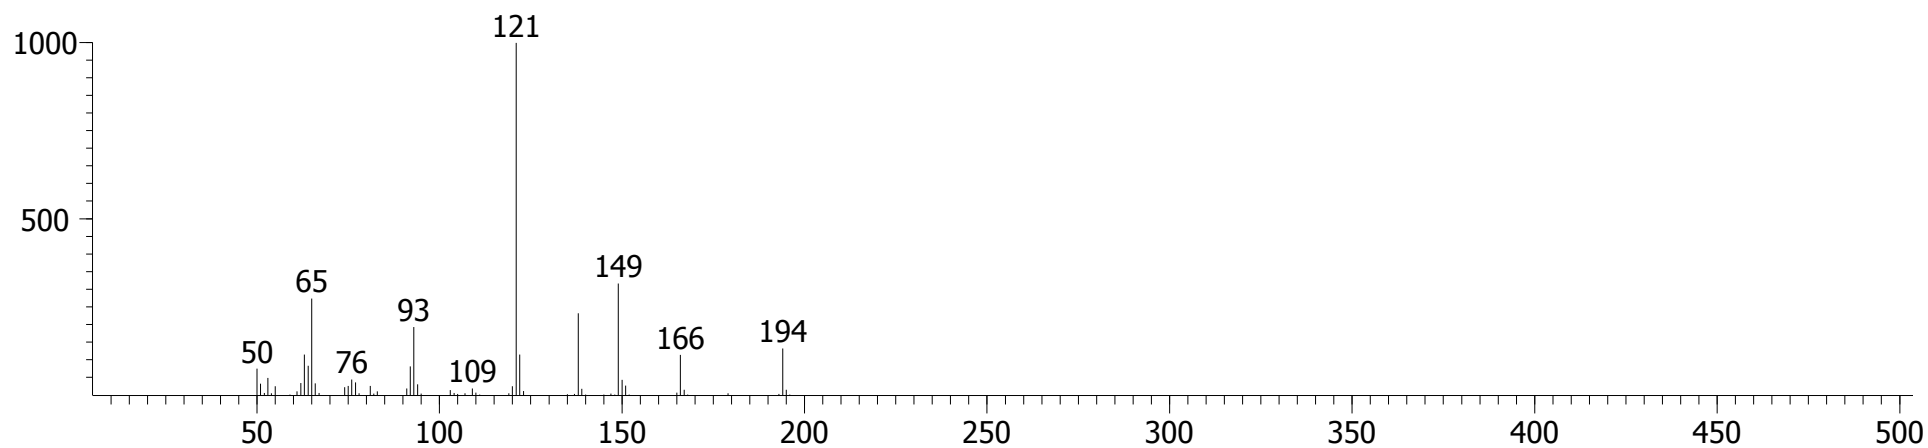

Library Hit - similarity 924, "Benzoic acid, 4-ethoxy-, ethyl ester"

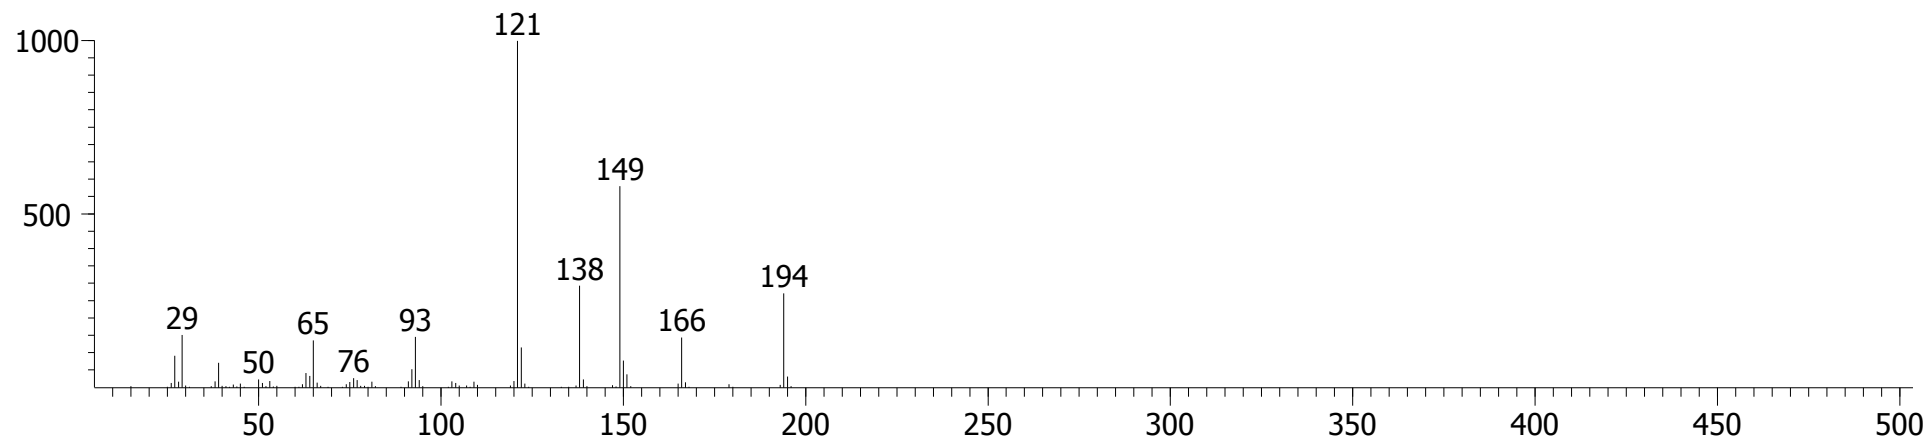

Sample 1, Fraction 2 (DCM)

Benzene, 1-chloro-4-(methylsulfinyl)-

CAS # = 934-73-6  
1st Dimension R.T. = 995.274  
2nd Dimension R.T. = 1.109  
Quant Mass(es) = 174  
S/N = 158.62  
Area = 3800.6  
Height = 613.61

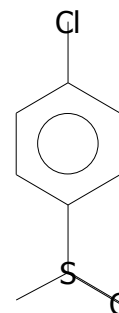

(p-Chlorophenyl methyl sulfoxide)

Peak True - sample "Lipid BM 1 F2:1", peak 693, at 995.274 , 1.109 sec , sec (Spec # 60058)

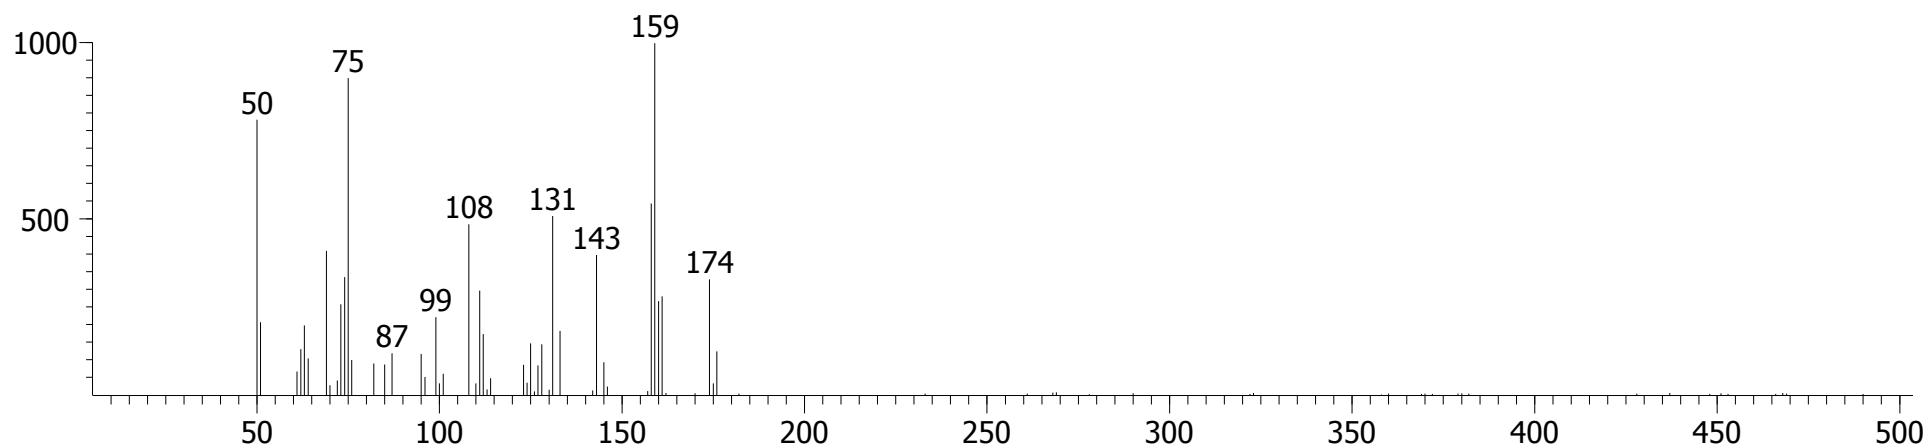

Library Hit - similarity 740, "Benzene, 1-chloro-4-(methylsulfinyl)-"

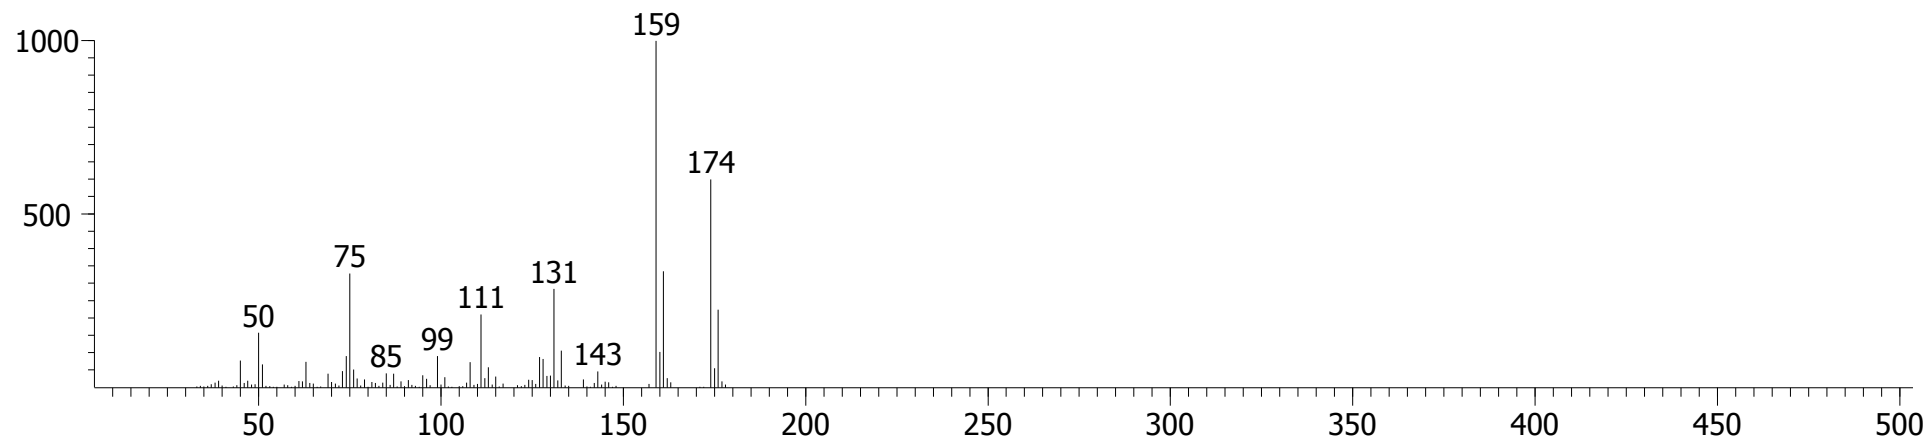

# Sample 1, Fraction 2 (DCM)

## Benzoic acid

CAS # = 65-85-0  
1st Dimension R.T. = 1016.26  
2nd Dimension R.T. = 0.805  
Quant Mass(es) = 122  
S/N = 223.65  
Area = 89851  
Height = 17197

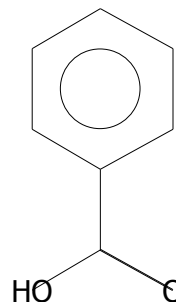

Peak True - sample "Lipid BM 1 F2:1", peak 730, at 1016.26 , 0.805 sec , sec (Spec # 63192)

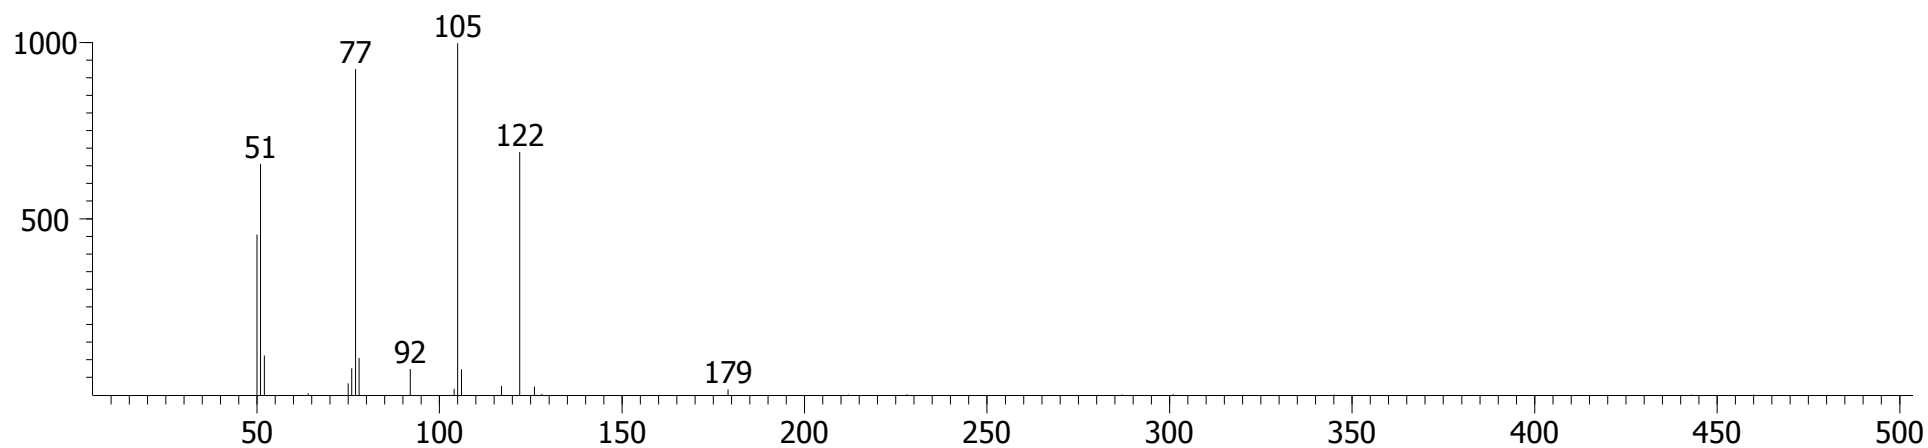

Library Hit - similarity 927, "Benzoic acid"

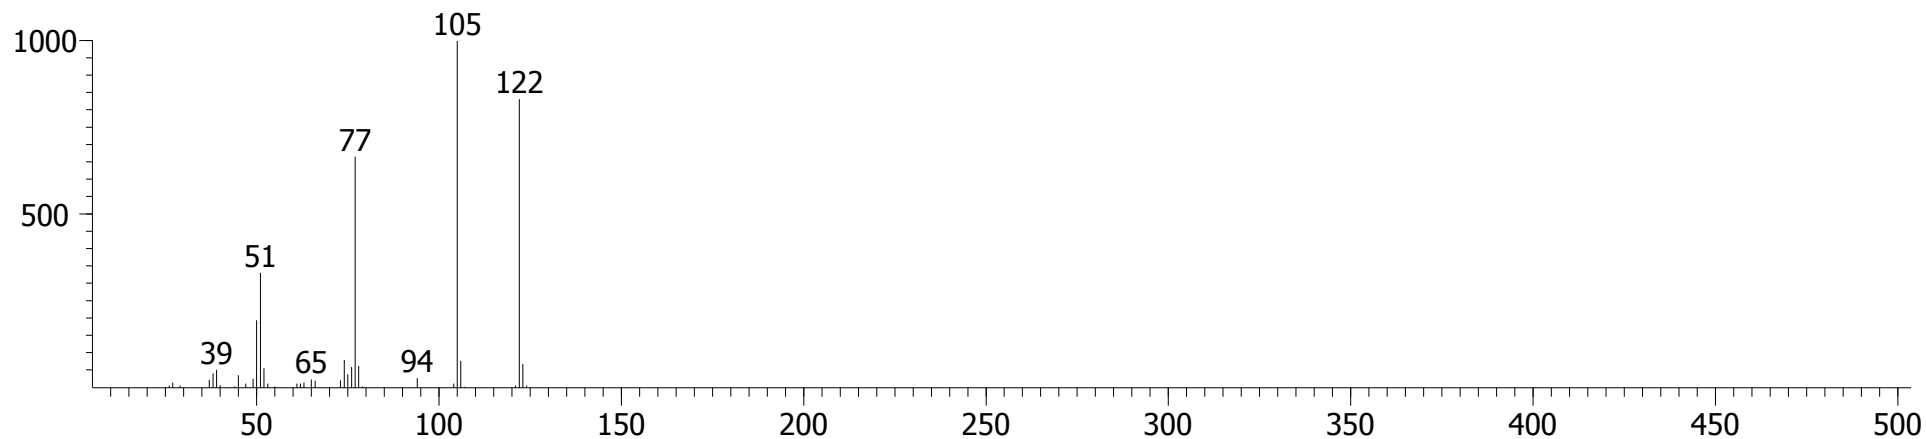

Sample 1, Fraction 2 (DCM)

1H-Benzotriazole, 4-methyl-

CAS # = 29878-31-7  
1st Dimension R.T. = 1030.25  
2nd Dimension R.T. = 1.135  
Quant Mass(es) = 133  
S/N = 101.06  
Area = 37901  
Height = 3652.4

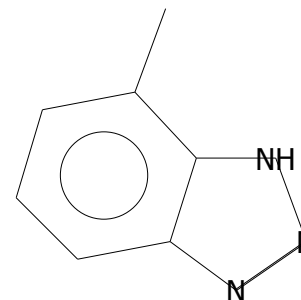

Peak True - sample "Lipid BM 1 F2:1", peak 779, at 1030.25 , 1.135 sec , sec (Spec # 65362)

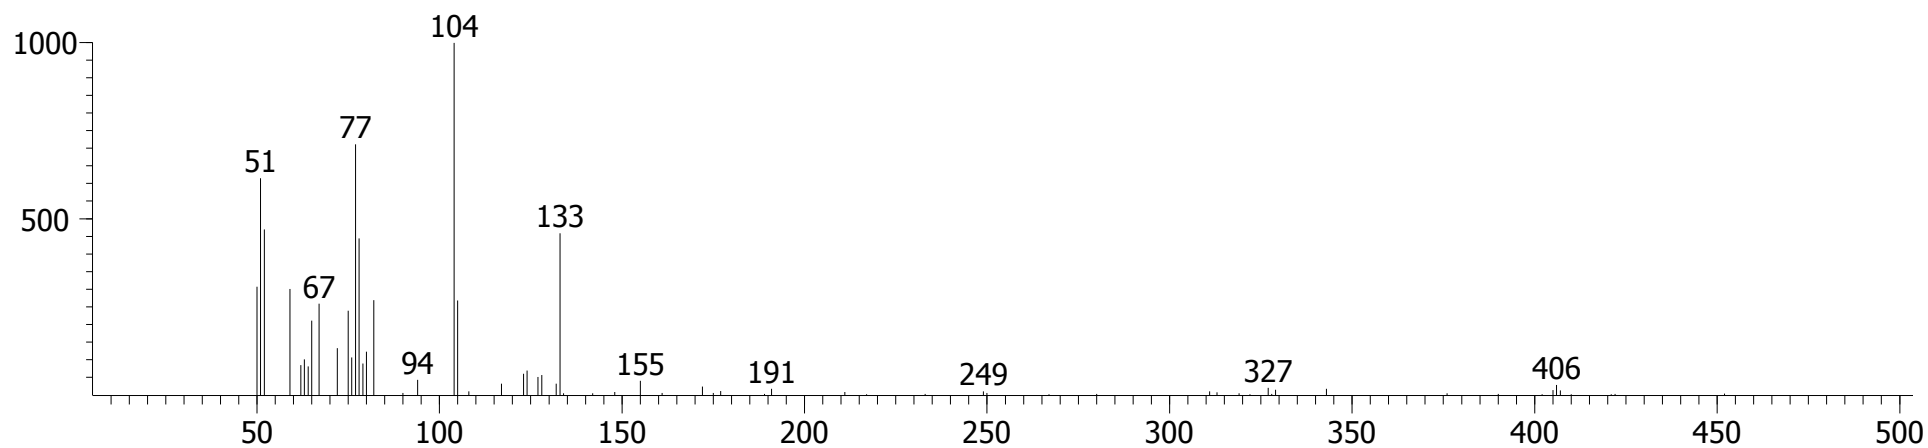

Library Hit - similarity 740, "1H-Benzotriazole, 4-methyl-"

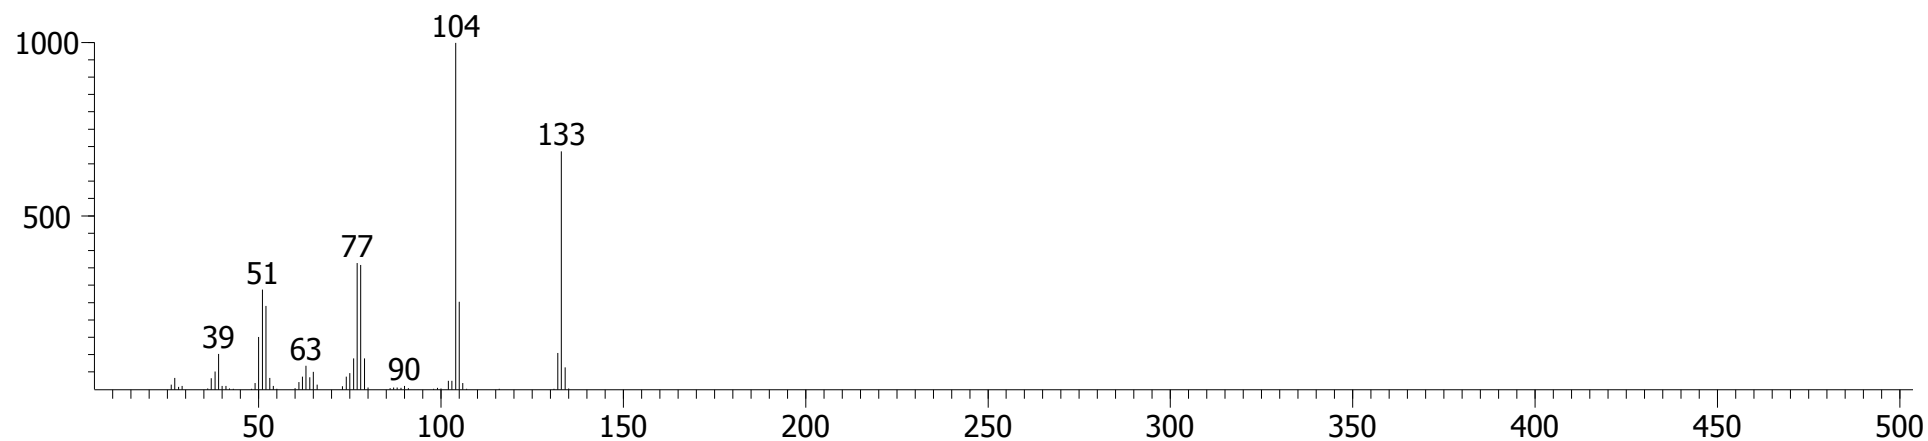

# Sample 1, Fraction 2 (DCM)

## Diethyl Phthalate

CAS # = 84-66-2  
1st Dimension R.T. = 1044.25  
2nd Dimension R.T. = 1.030  
Quant Mass(es) = 177  
S/N = 2913.8  
Area = 98241  
Height = 13968

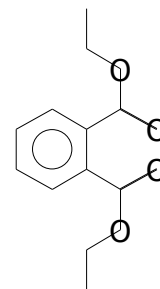

Peak True - sample "Lipid BM 1 F2:1", peak 810, at 1044.25 , 1.030 sec , sec (Spec # 67466)

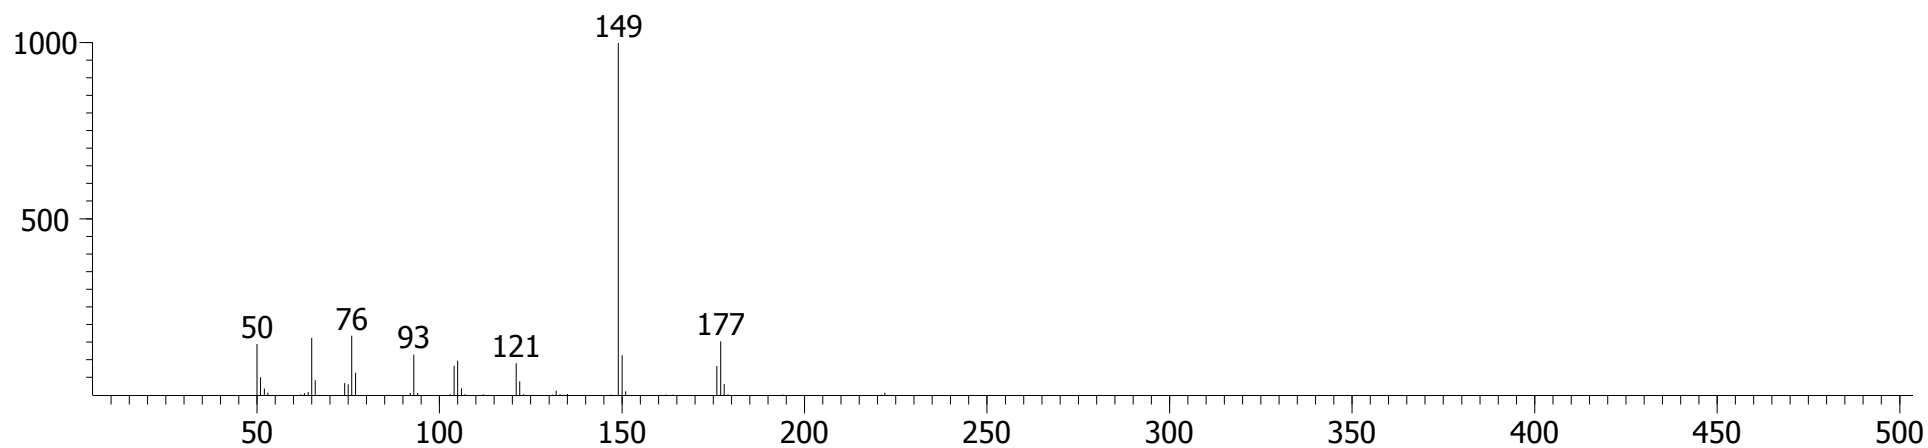

Library Hit - similarity 943, "Diethyl Phthalate"

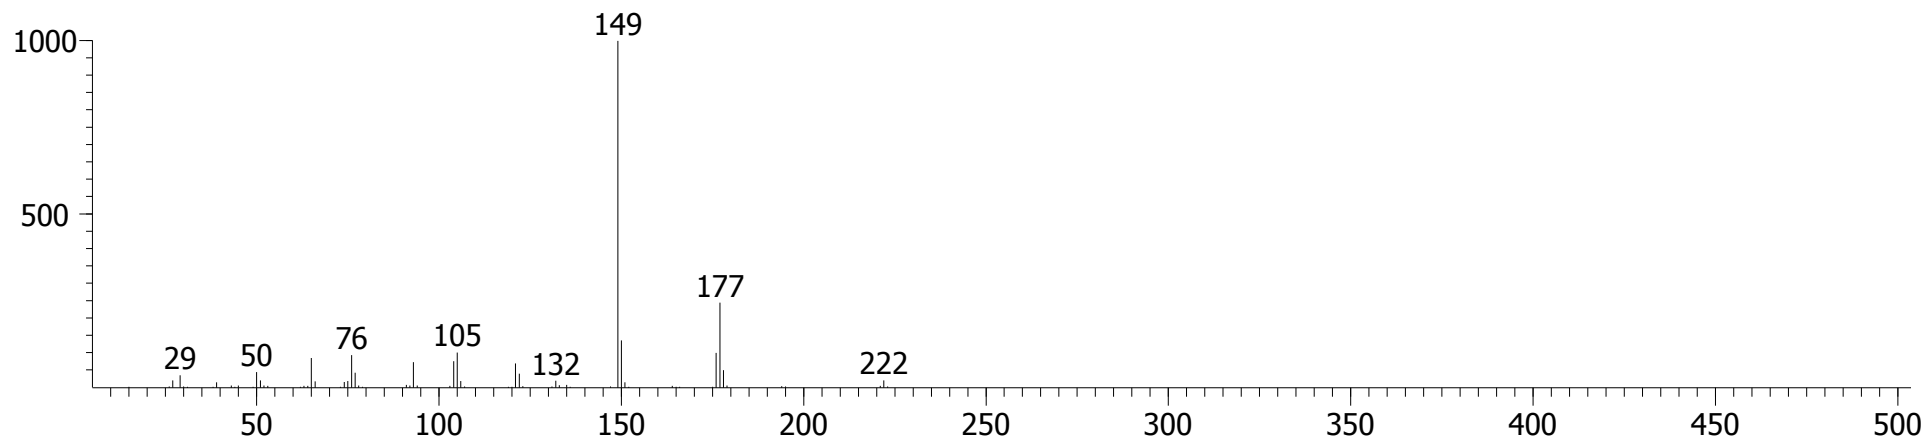

# Sample 1, Fraction 2 (DCM)

## UNKNOWN # 4

CAS # = 0-00-0

1st Dimension R.T. = 1072.23

2nd Dimension R.T. = 0.964

Quant Mass(es) = 211

S/N = 93.579

Area = 9158.2

Height = 1769.0

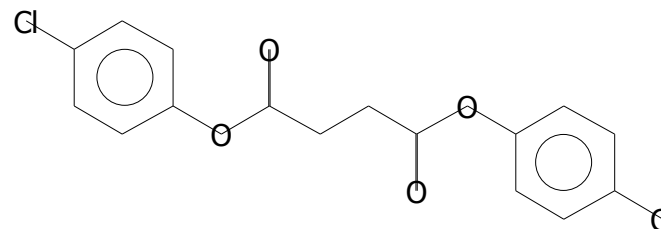

Peak True - sample "Lipid BM 1 F2:1", peak 852, at 1072.23 , 0.964 sec , sec (Spec # 71696)

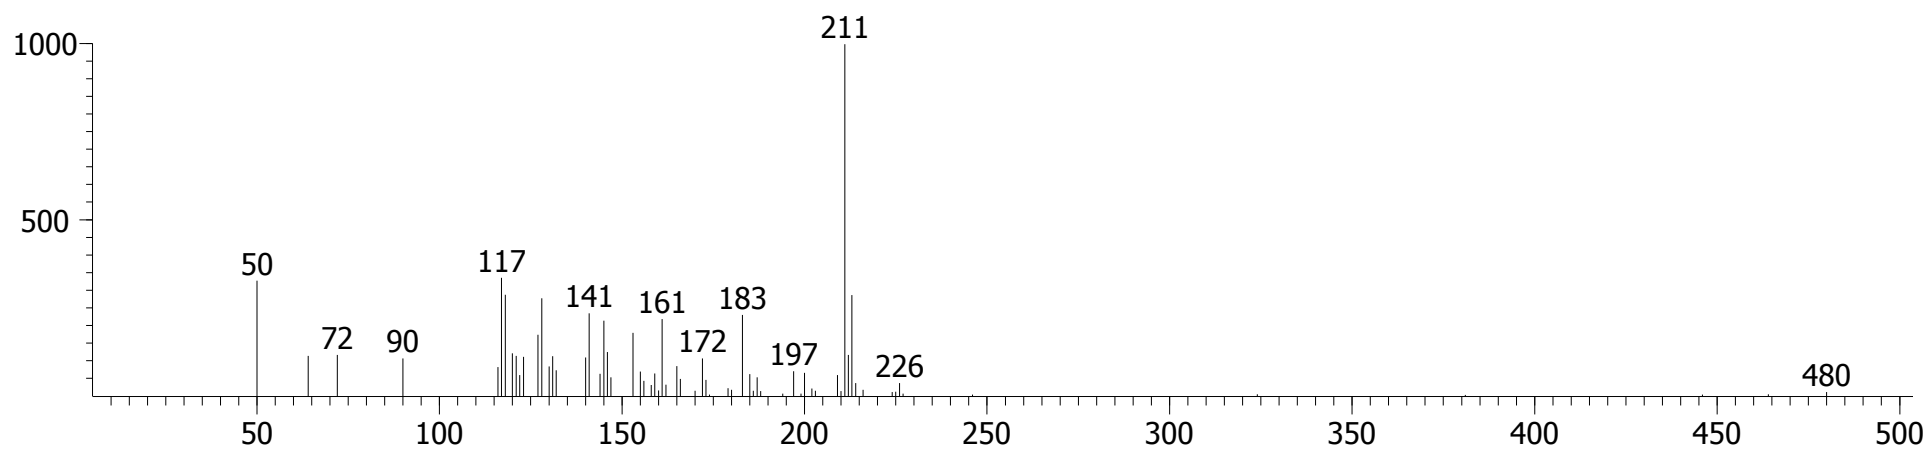

Library Hit - similarity 531, "Succinic acid, di(4-chlorophenyl) ester"

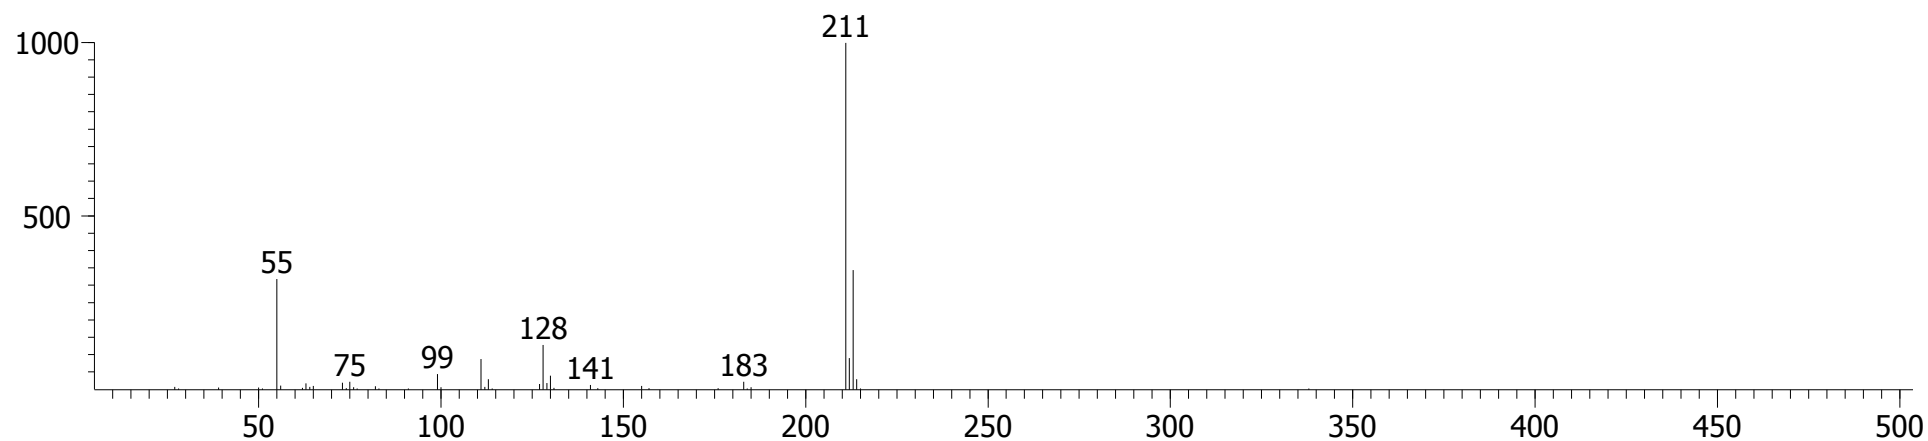

Sample 1, Fraction 2 (DCM)

2-Pyrrolidinone, 1-phenyl-

CAS # = 4641-57-0  
1st Dimension R.T. = 1089.72  
2nd Dimension R.T. = 1.148  
Quant Mass(es) = 161  
S/N = 236.54  
Area = 6695.6  
Height = 975.73

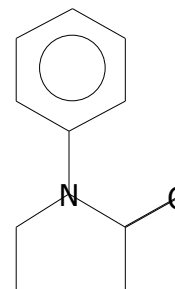

Peak True - sample "Lipid BM 1 F2:1", peak 896, at 1089.72 , 1.148 sec , sec (Spec # 74374)

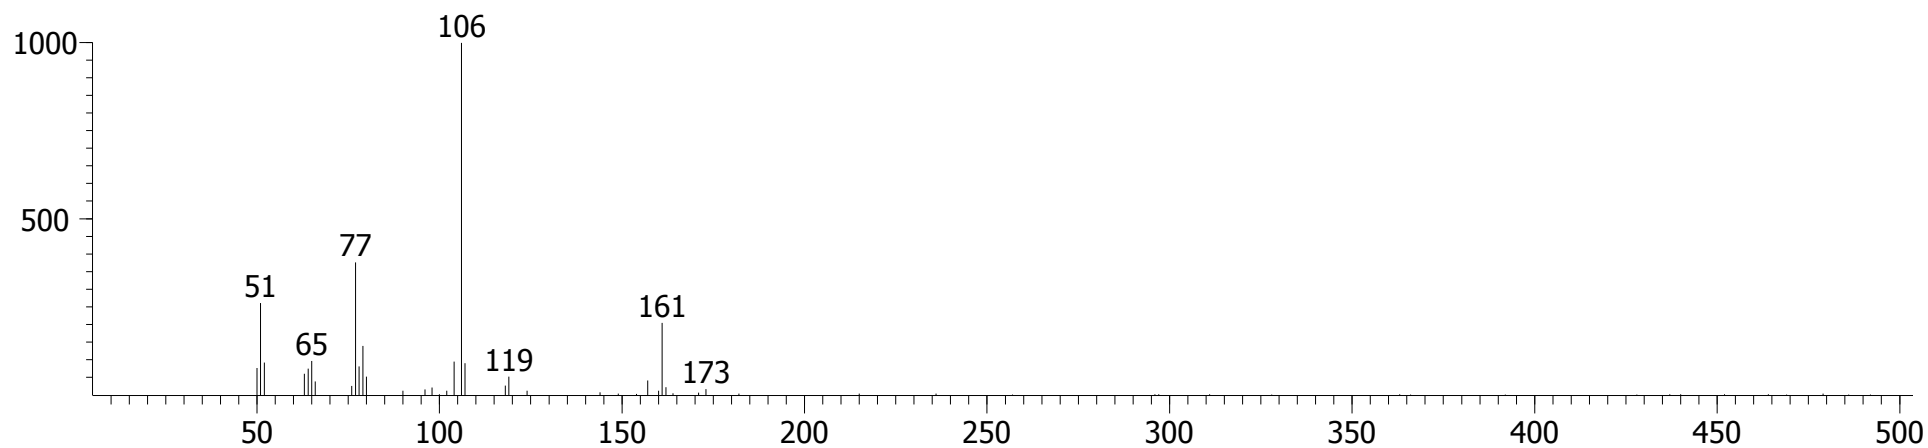

Library Hit - similarity 817, "2-Pyrrolidinone, 1-phenyl-"

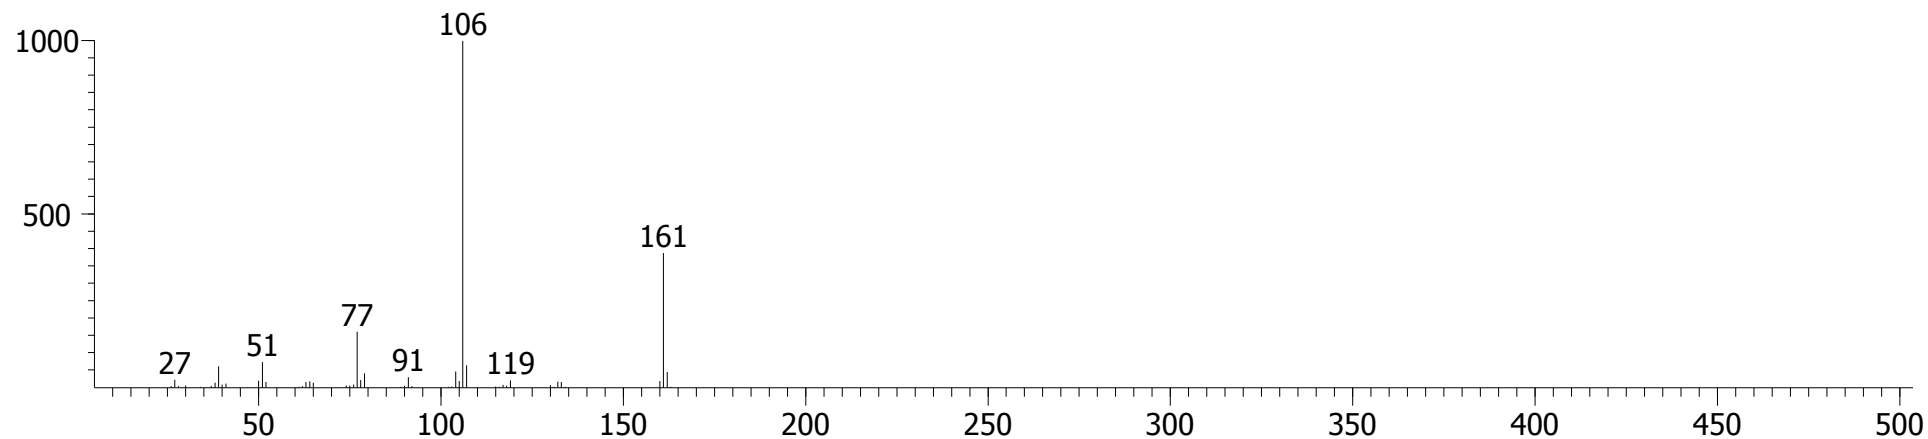



Sample 1, Fraction 2 (DCM)

m-Anisic acid, 4-nitrophenyl ester

CAS # = 0-00-0  
1st Dimension R.T. = 1117.7  
2nd Dimension R.T. = 0.970  
Quant Mass(es) = 135  
S/N = 2159.4  
Area = 376052  
Height = 58646

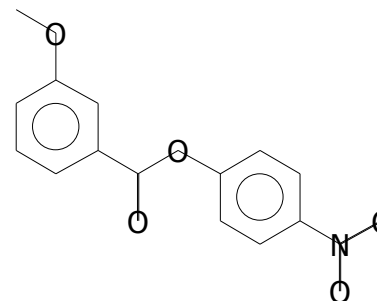

Peak True - sample "Lipid BM 1 F2:1", peak 945, at 1117.7 , 0.970 sec , sec (Spec # 78587)

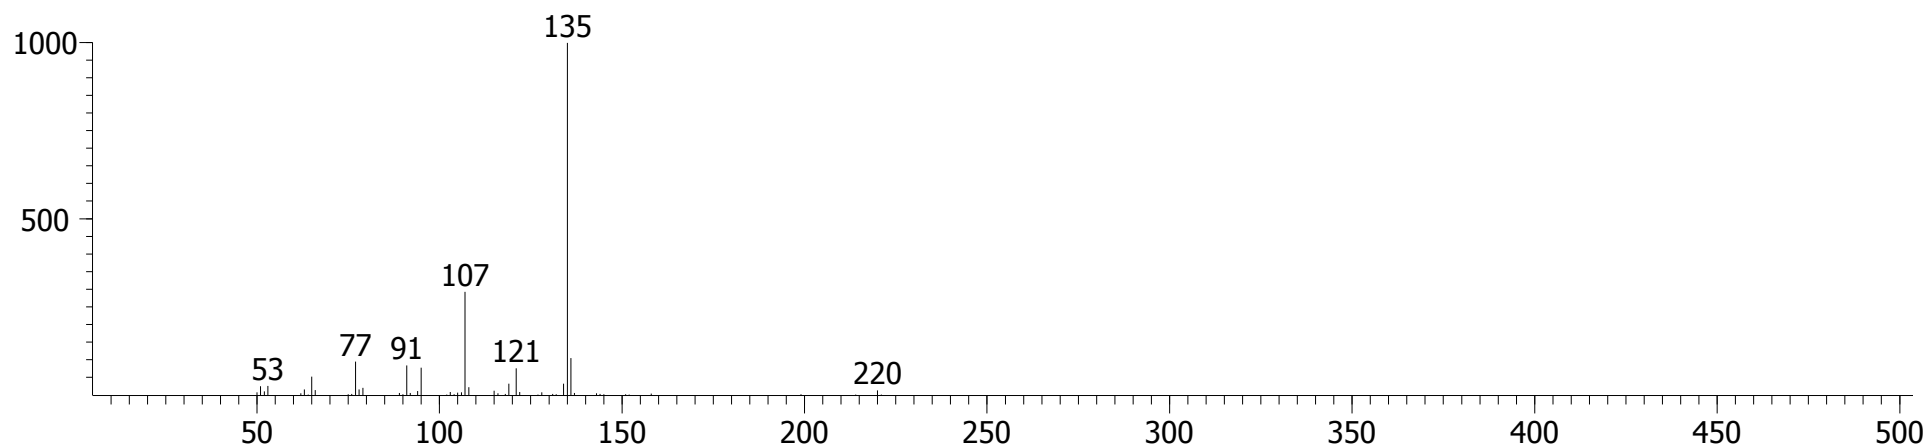

Library Hit - similarity 864, "m-Anisic acid, 4-nitrophenyl ester"

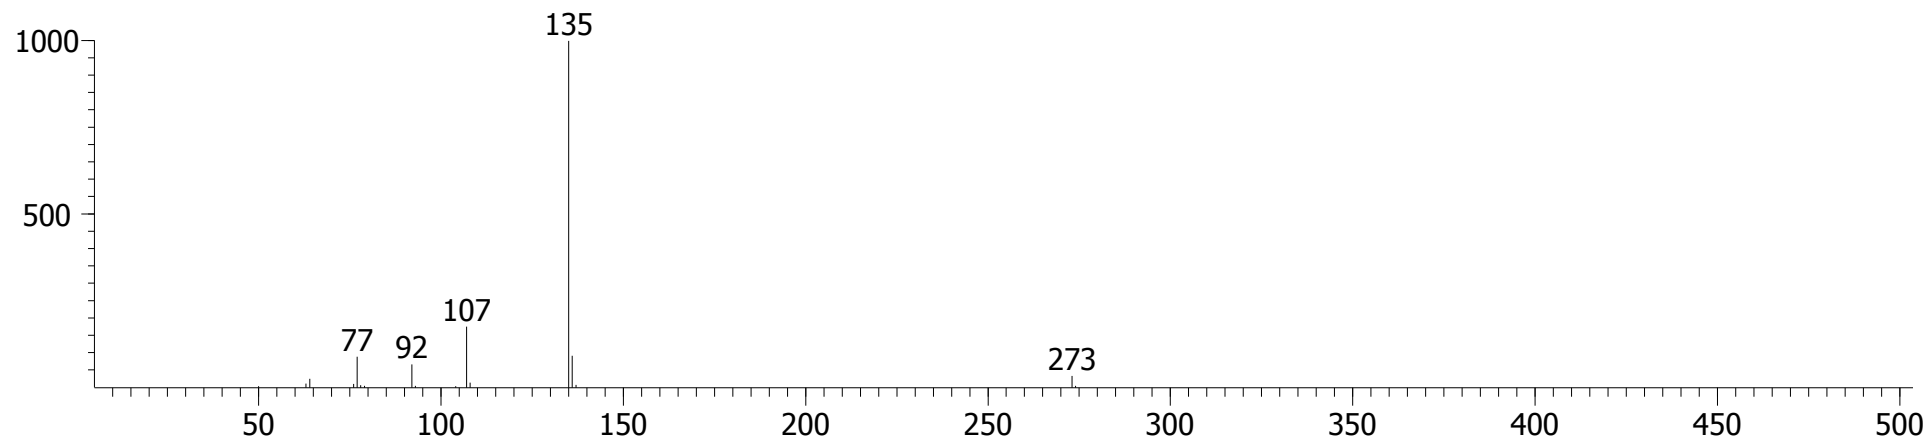

# Sample 1, Fraction 2 (DCM)

## p-Hydroxybiphenyl

CAS # = 92-69-3  
1st Dimension R.T. = 1131.7  
2nd Dimension R.T. = 1.115  
Quant Mass(es) = 170  
S/N = 154.59  
Area = 11995  
Height = 1688.1

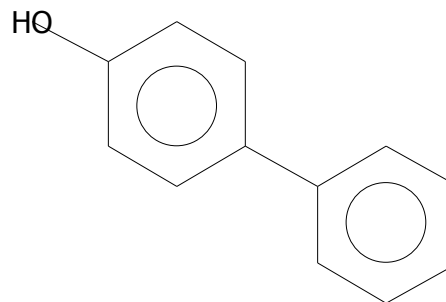

Peak True - sample "Lipid BM 1 F2:1", peak 975, at 1131.7 , 1.115 sec , sec (Spec # 80729)

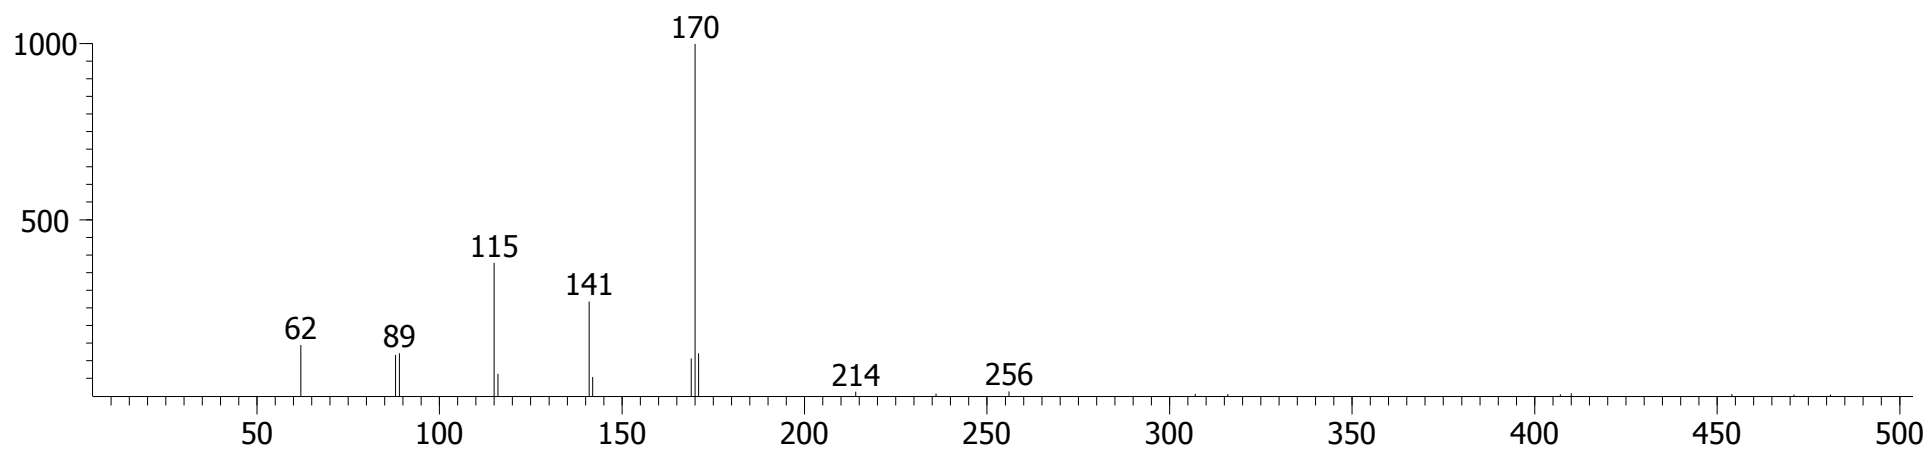

Library Hit - similarity 889, "p-Hydroxybiphenyl"

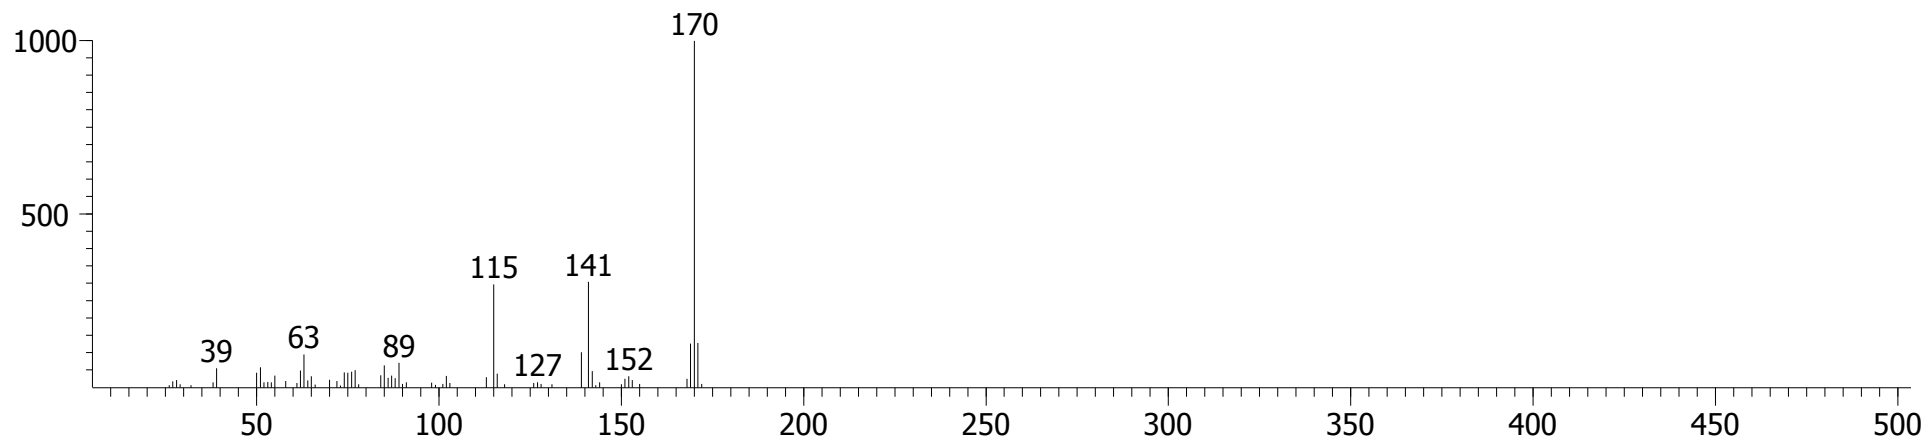

# Sample 1, Fraction 2 (DCM)

## 3,5-di-tert-Butyl-4-hydroxybenzaldehyde

CAS # = 1620-98-0  
1st Dimension R.T. = 1159.68  
2nd Dimension R.T. = 0.997  
Quant Mass(es) = 234  
S/N = 1253.8  
Area = 13752  
Height = 2262.4

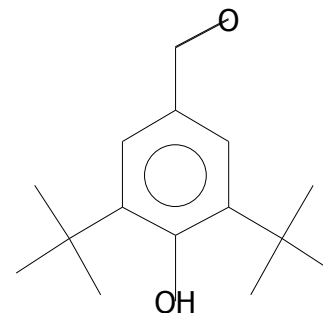

Peak True - sample "Lipid BM 1 F2:1", peak 1053, at 1159.68 , 0.997 sec , sec (Spec # 84951)

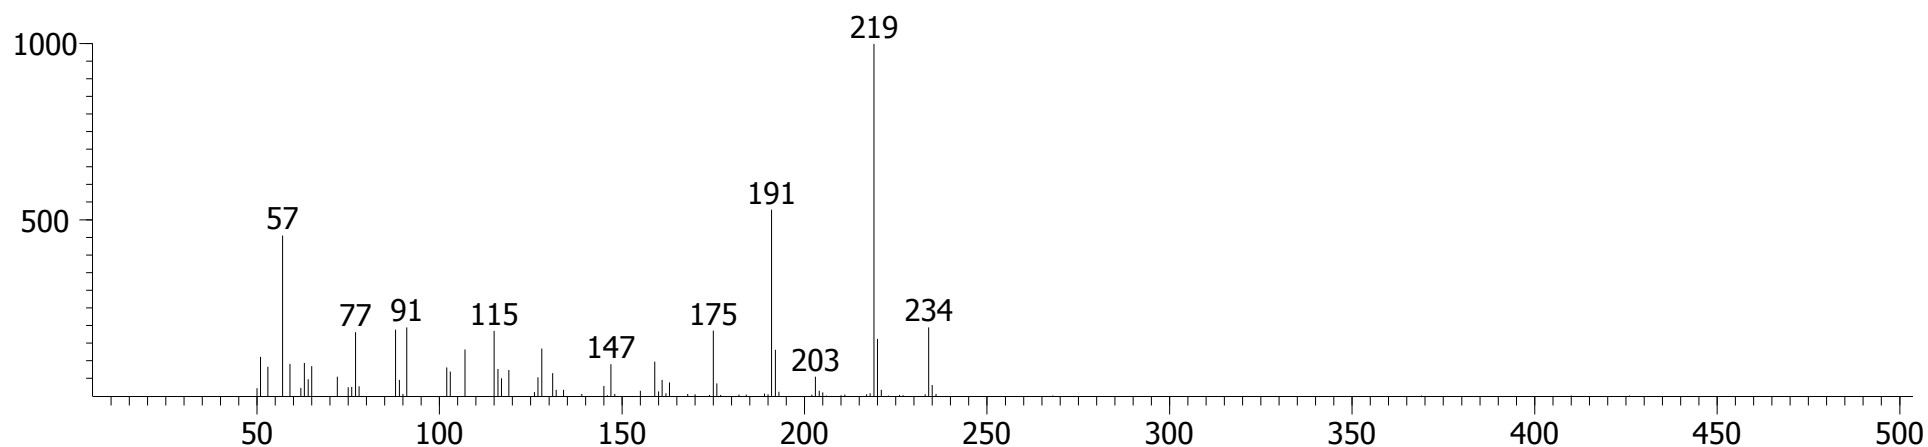

Library Hit - similarity 870, "3,5-di-tert-Butyl-4-hydroxybenzaldehyde"

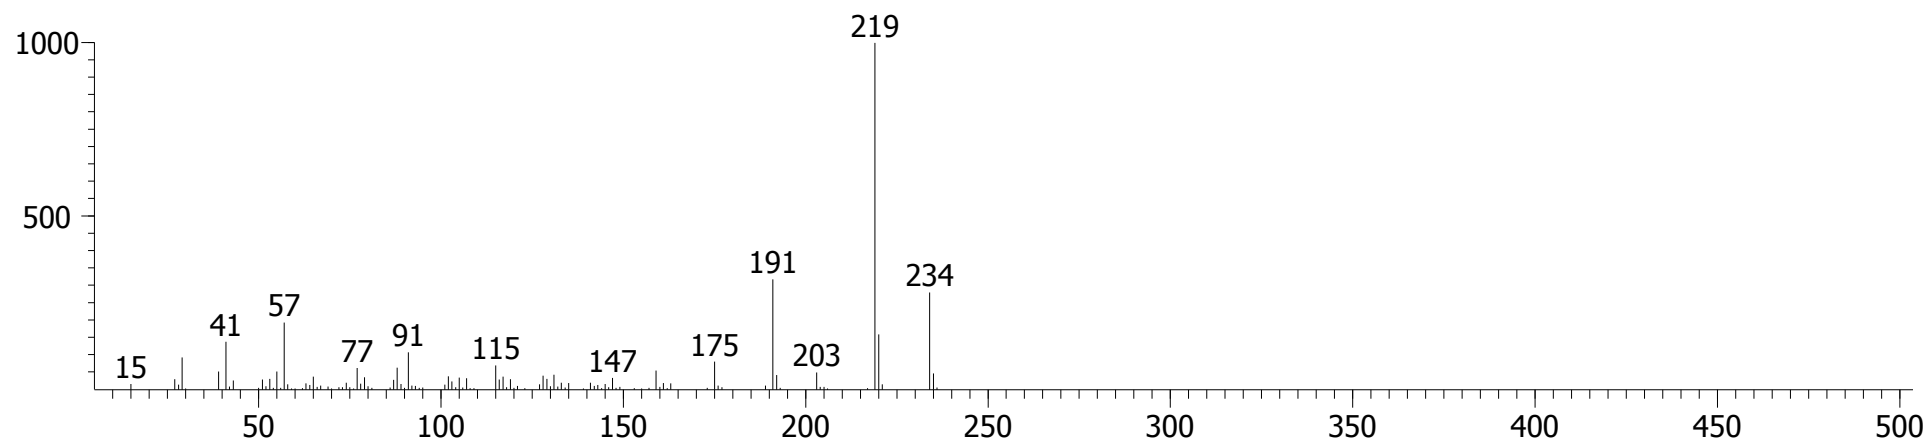

# Sample 1, Fraction 2 (DCM)

## Benzo[h]cinnoline

CAS # = 230-31-9  
1st Dimension R.T. = 1159.68  
2nd Dimension R.T. = 1.135  
Quant Mass(es) = 180  
S/N = 55.362  
Area = 4356.8  
Height = 598.02

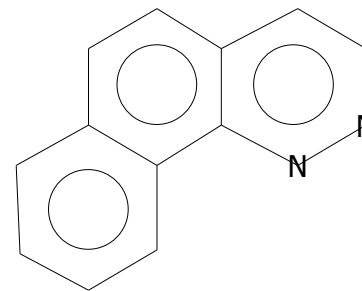

Peak True - sample "Lipid BM 1 F2:1", peak 1055, at 1159.68 , 1.135 sec , sec (Spec # 84972)

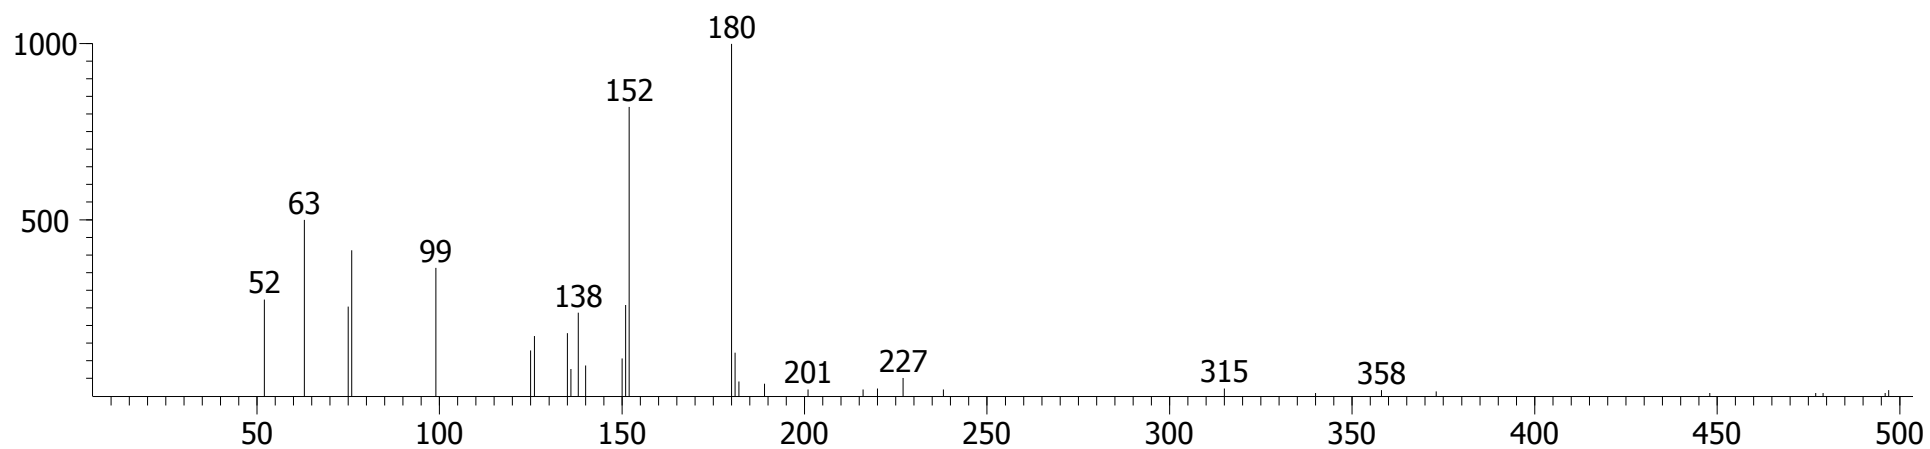

Library Hit - similarity 757, "Benzo[h]cinnoline"

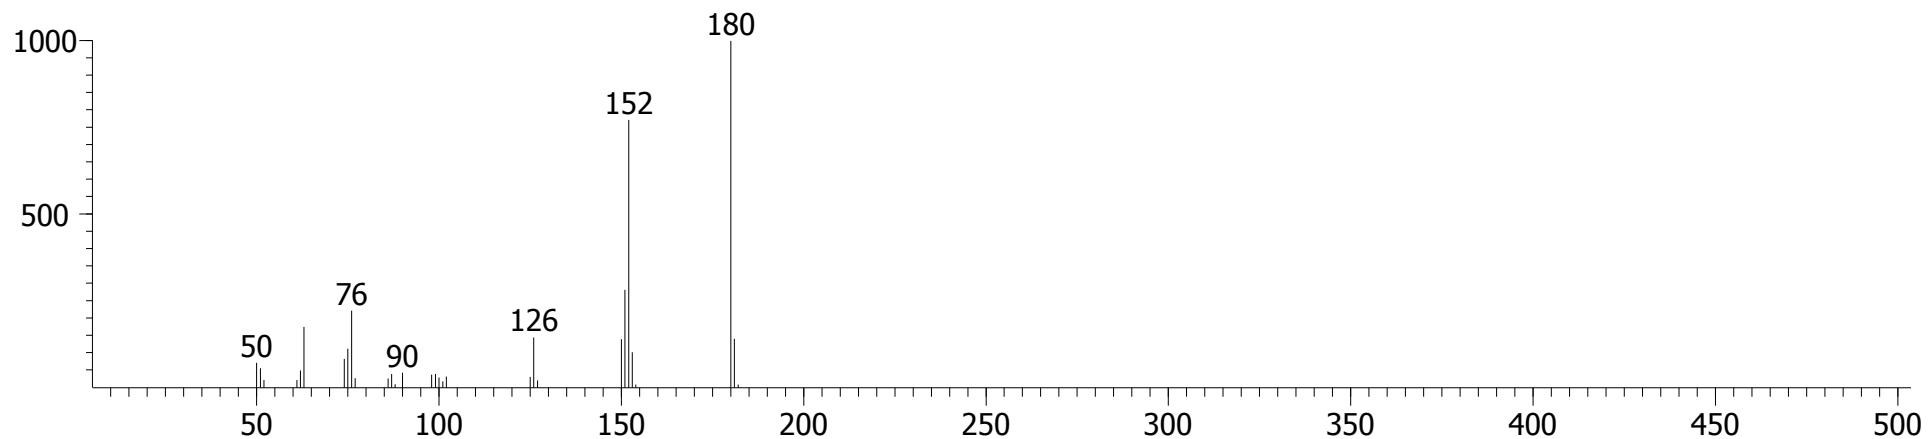

Sample 1, Fraction 2 (DCM)

N-(2-Cyano-ethyl)-benzenesulfonamide

CAS # = 2619-21-8  
1st Dimension R.T. = 1177.17  
2nd Dimension R.T. = 1.115  
Quant Mass(es) = 170  
S/N = 966.45  
Area = 90012  
Height = 13033

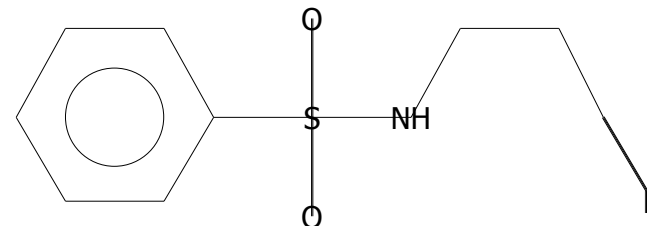

Peak True - sample "Lipid BM 1 F2:1", peak 1085, at 1177.17 , 1.115 sec , sec (Spec # 87619)

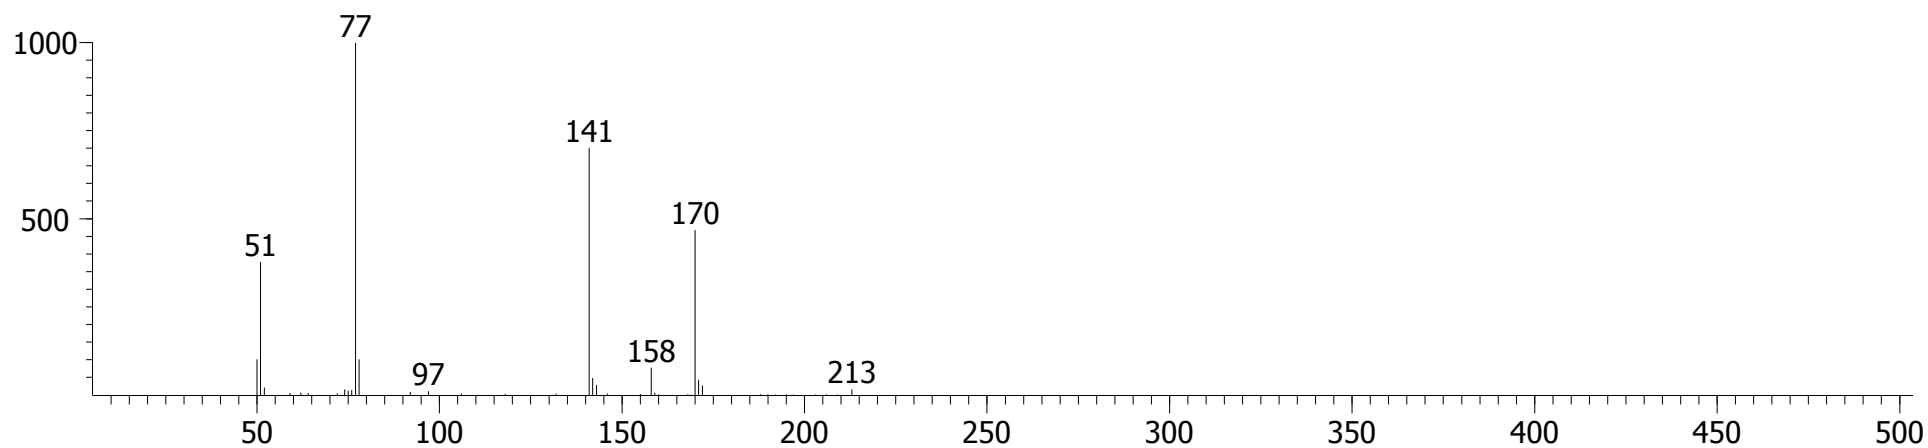

Library Hit - similarity 942, "N-(2-Cyano-ethyl)-benzenesulfonamide"

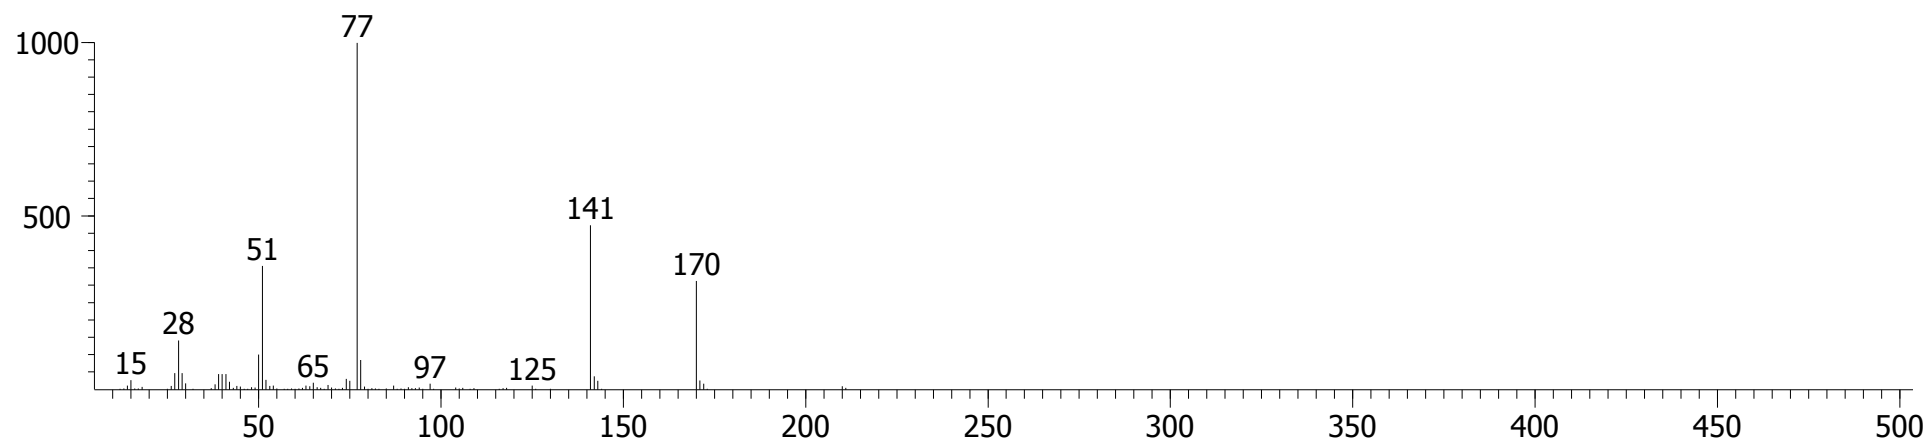

Sample 1, Fraction 2 (DCM)

Phenol, 2-(1-phenylethyl)-

CAS # = 4237-44-9  
1st Dimension R.T. = 1187.66  
2nd Dimension R.T. = 1.109  
Quant Mass(es) = 198  
S/N = 131.54  
Area = 2053.6  
Height = 326.15

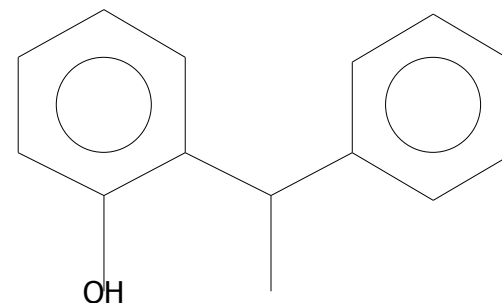

Peak True - sample "Lipid BM 1 F2:1", peak 1104, at 1187.66 , 1.109 sec , sec (Spec # 89208)

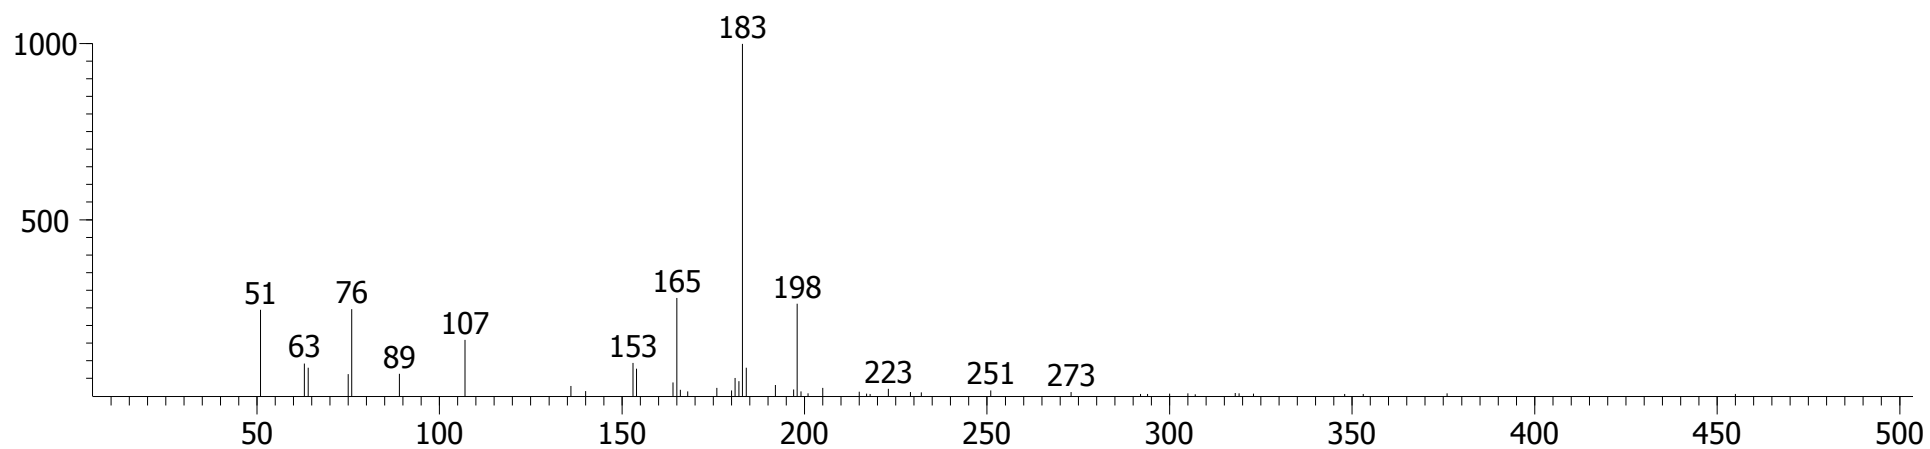

Library Hit - similarity 715, "Phenol, 2-(1-phenylethyl)-"

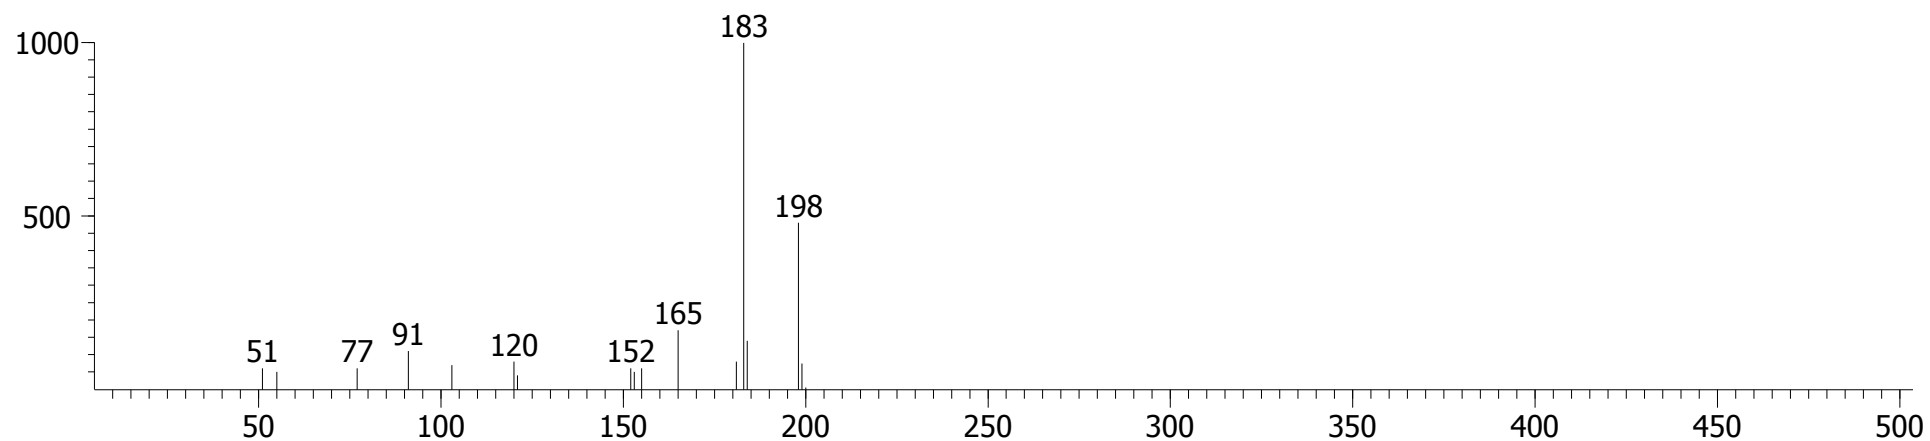

# Sample 1, Fraction 2 (DCM)

## Phenanthrene

CAS # = 85-01-8  
1st Dimension R.T. = 1191.16  
2nd Dimension R.T. = 1.129  
Quant Mass(es) = 178  
S/N = 178.40  
Area = 27033  
Height = 3571.3



Peak True - sample "Lipid BM 1 F2:1", peak 1115, at 1191.16 , 1.129 sec , sec (Spec # 89741)

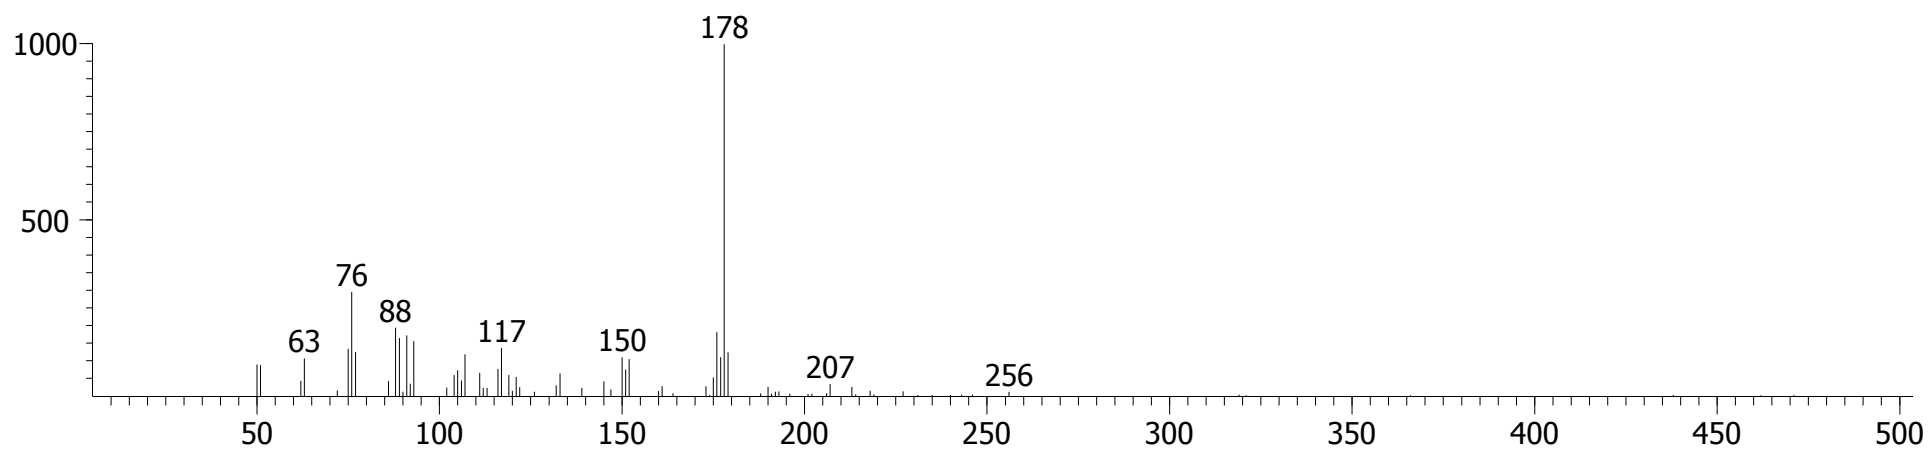

Library Hit - similarity 801, "Phenanthrene"

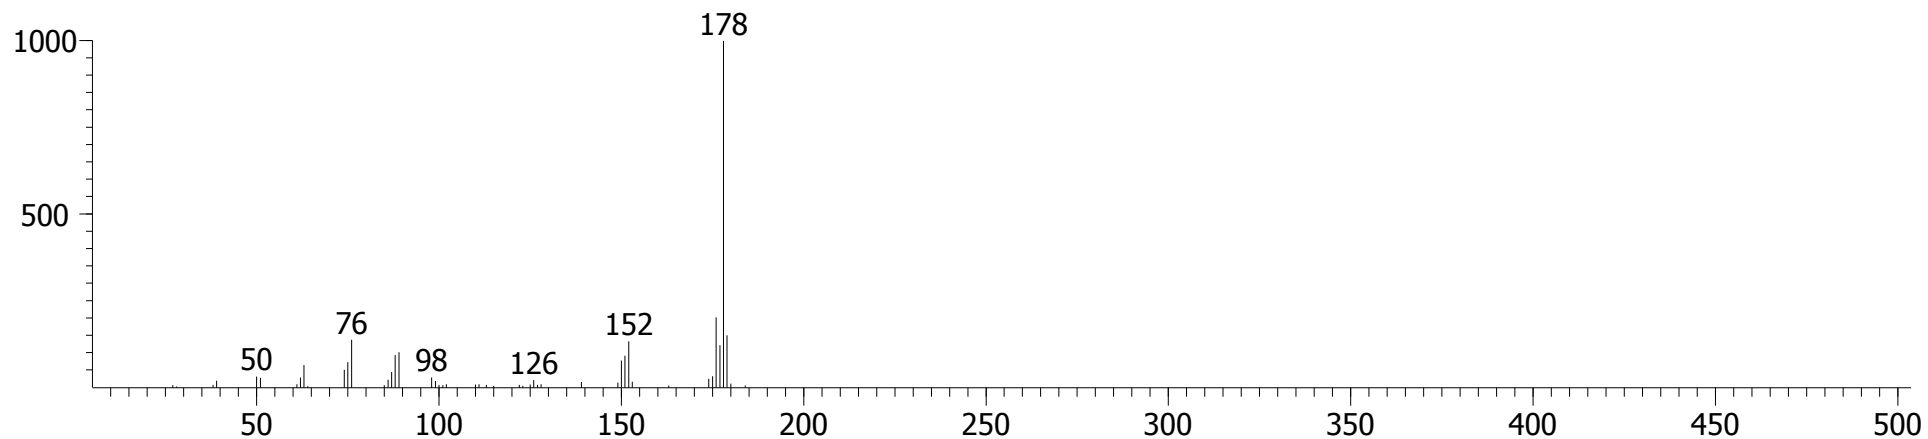

# Sample 1, Fraction 2 (DCM)

## Benzoic acid

CAS # = 65-85-0  
1st Dimension R.T. = 1226.14  
2nd Dimension R.T. = 0.733  
Quant Mass(es) = 122  
S/N = 224.60  
Area = 36877  
Height = 8250.8



Peak True - sample "Lipid BM 1 F2:1", peak 1175, at 1226.14 , 0.733 sec , sec (Spec # 94981)

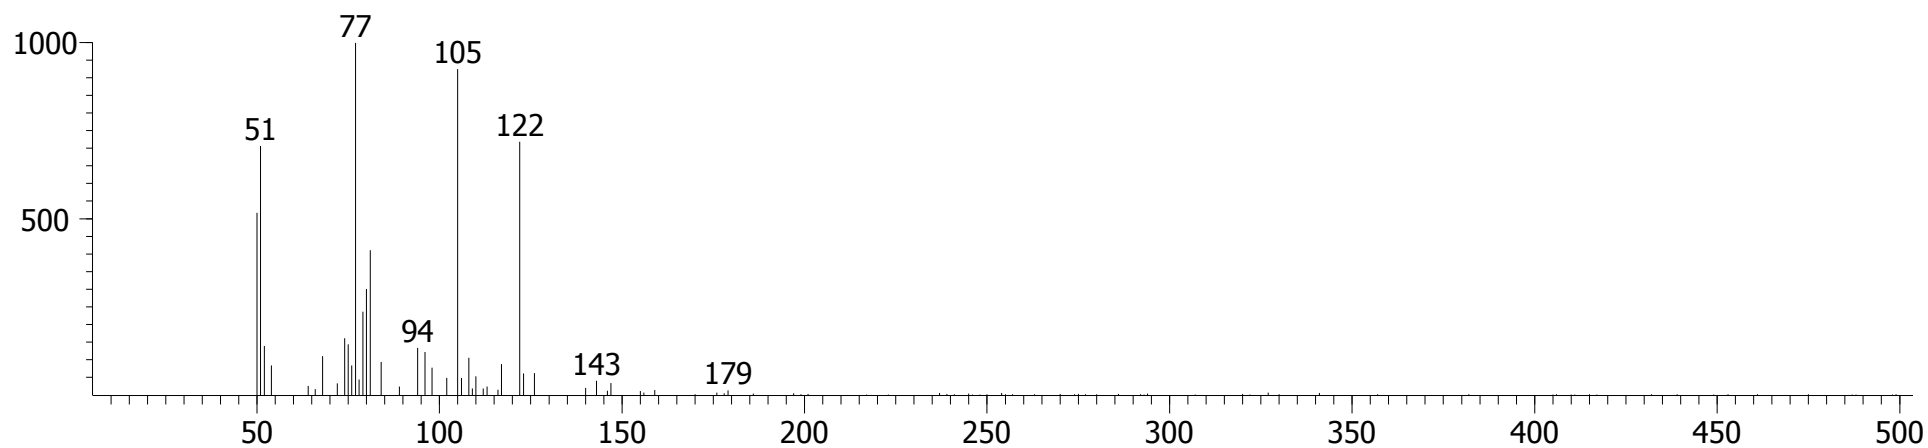

Library Hit - similarity 714, "Benzoic acid"

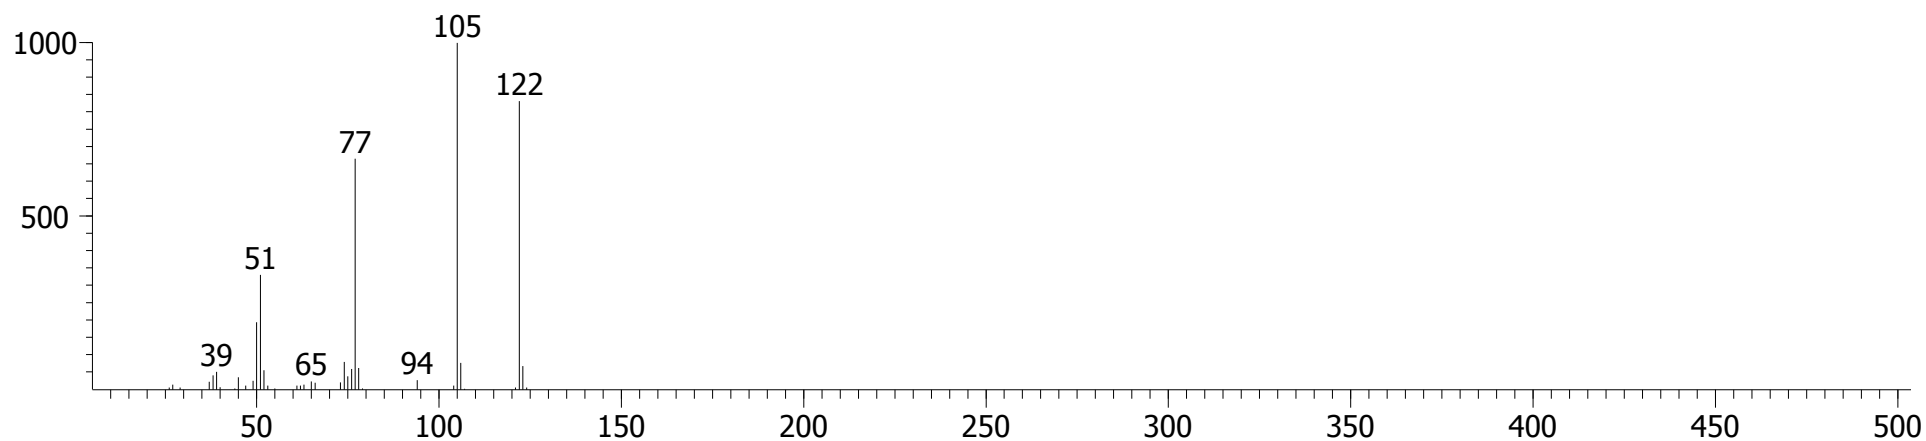



# Sample 1, Fraction 2 (DCM)

## Thiophene-2-carbonitrile, 5-tert-butyl-3-(4-chlorobenzylidnamino)-

CAS # = 0-00-0

1st Dimension R.T. = 1236.64

2nd Dimension R.T. = 0.983

Quant Mass(es) = 302

S/N = 325.38

Area = 1629.3

Height = 255.75

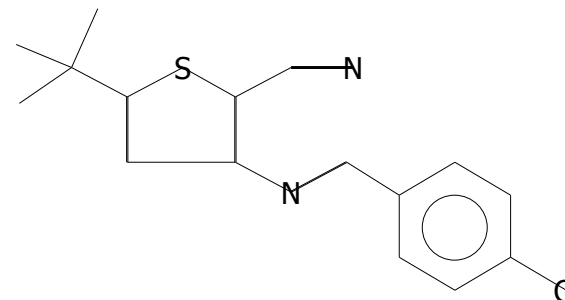

Peak True - sample "Lipid BM 1 F2:1", peak 1210, at 1236.64 , 0.983 sec , sec (Spec # 96609)

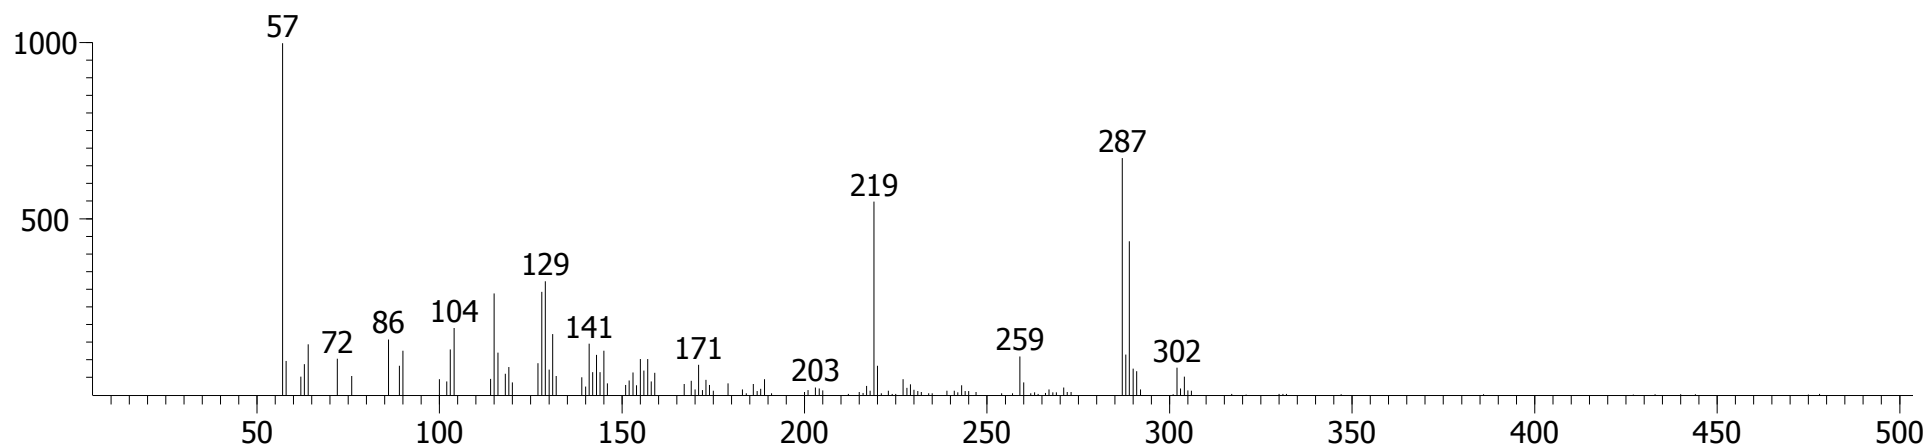

Library Hit - similarity 583, "Thiophene-2-carbonitrile, 5-tert-butyl-3-(4-chlorobenzylidnamino)-"

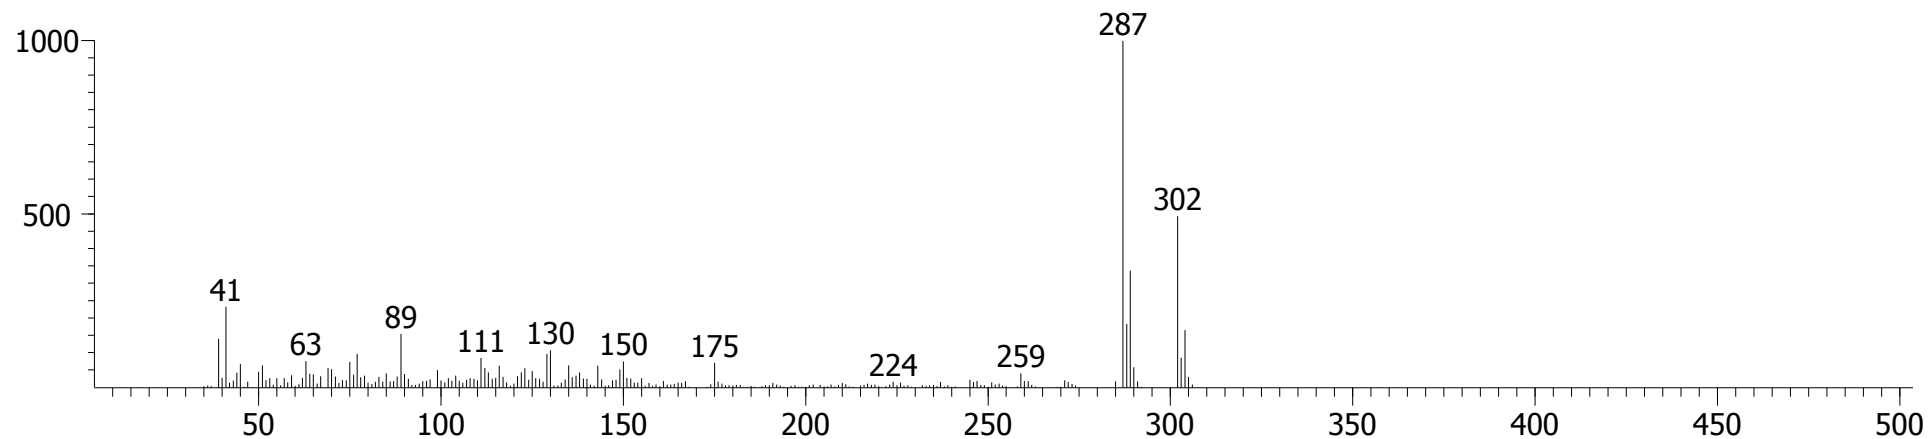

# Sample 1, Fraction 2 (DCM)

## Benzoic acid

CAS # = 65-85-0  
1st Dimension R.T. = 1257.62  
2nd Dimension R.T. = 0.726  
Quant Mass(es) = 122  
S/N = 449.79  
Area = 193008  
Height = 41411



Peak True - sample "Lipid BM 1 F2:1", peak 1262, at 1257.62 , 0.726 sec , sec (Spec # 99750)

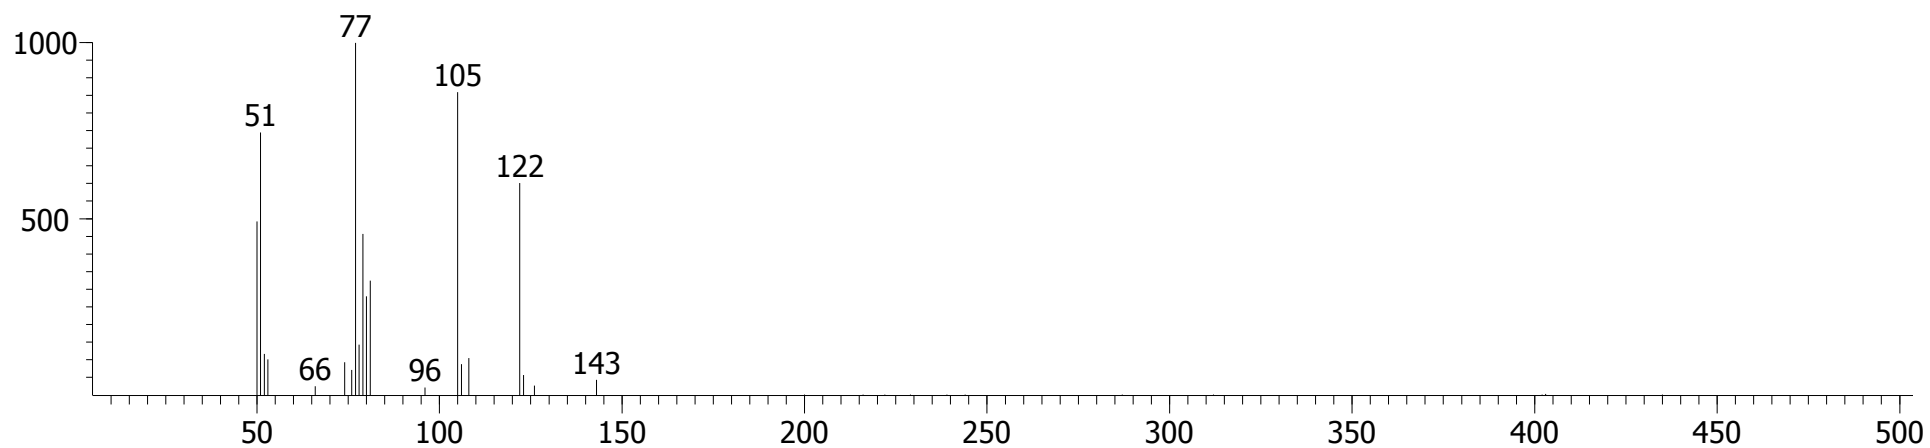

Library Hit - similarity 750, "Benzoic acid"

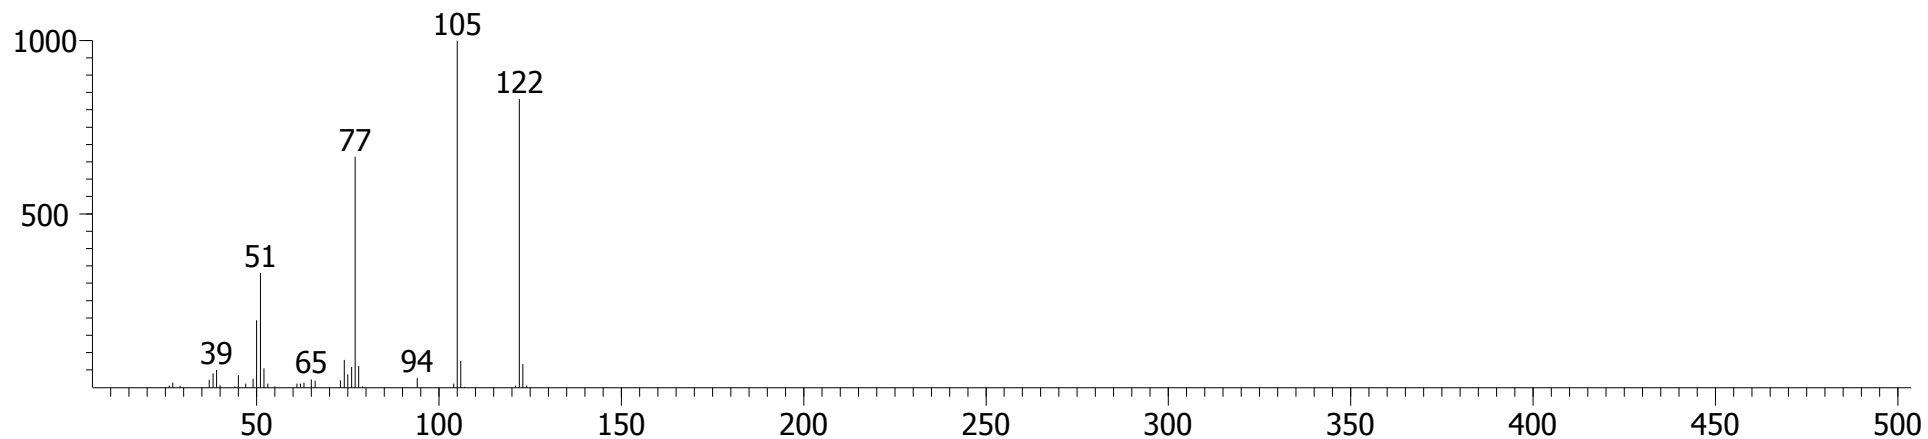

# Sample 1, Fraction 2 (DCM)

## 4,4'-Dichlorodiphenylsulphide

CAS # = 5181-10-2

1st Dimension R.T. = 1292.6

2nd Dimension R.T. = 1.102

Quant Mass(es) = 254

S/N = 1529.0

Area = 63825

Height = 8023.4

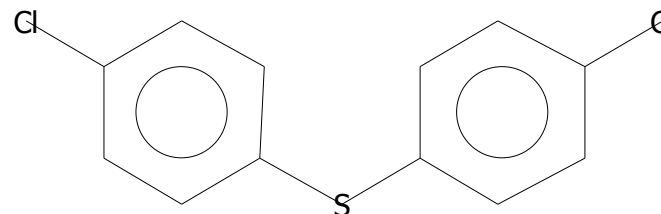

Peak True - sample "Lipid BM 1 F2:1", peak 1399, at 1292.6 , 1.102 sec , sec (Spec # 105107)

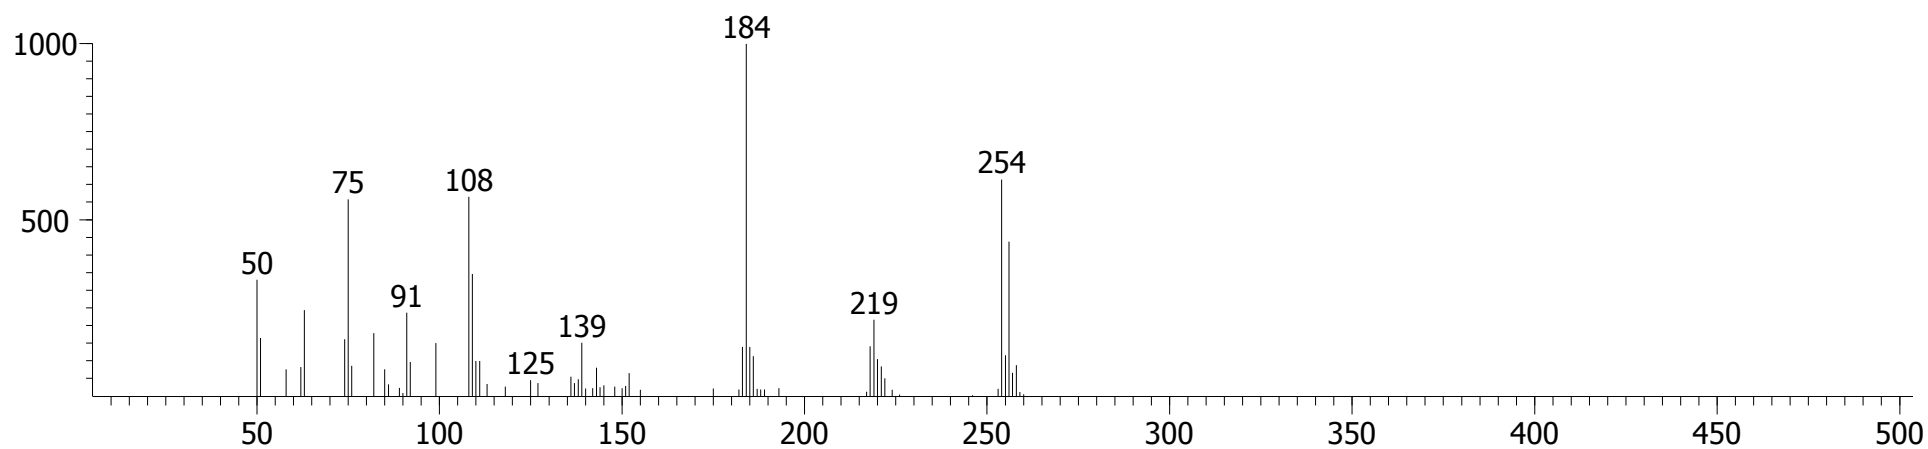

Library Hit - similarity 837, "4,4'-Dichlorodiphenylsulphide"

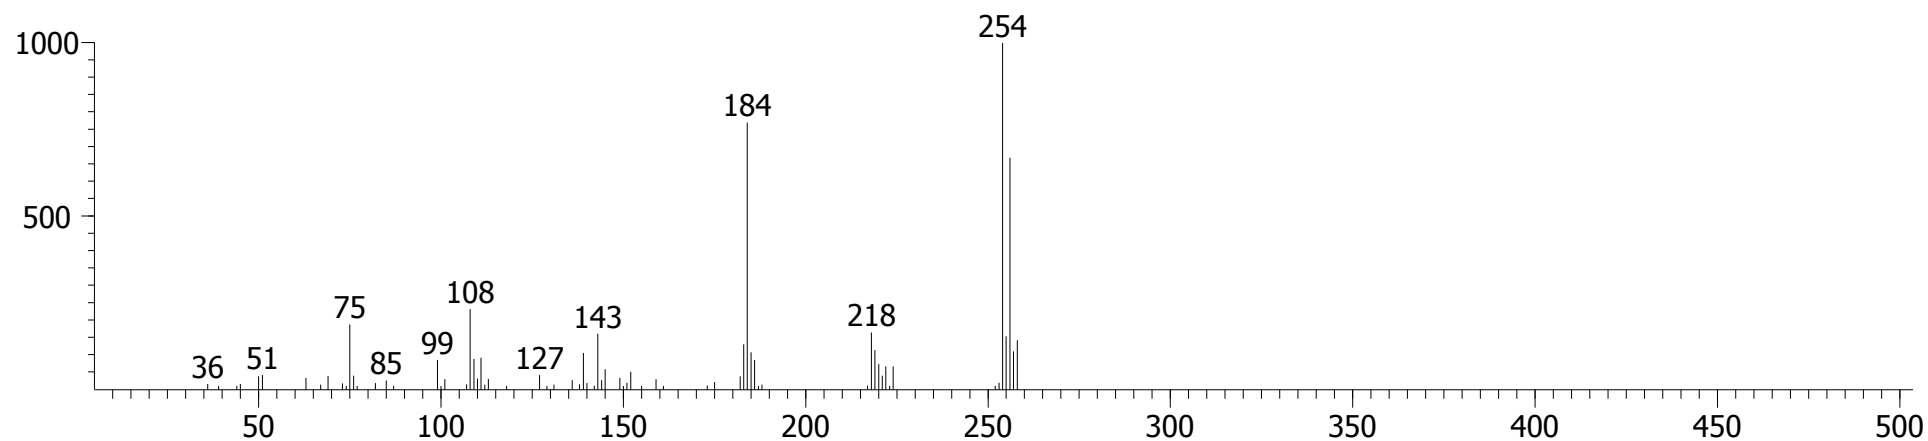

# Sample 1, Fraction 2 (DCM)

## Phenanthrene, 2,3-dimethyl-

CAS # = 3674-65-5  
1st Dimension R.T. = 1334.58  
2nd Dimension R.T. = 1.155  
Quant Mass(es) = 206  
S/N = 111.28  
Area = 6514.3  
Height = 837.07



Peak True - sample "Lipid BM 1 F2:1", peak 1524, at 1334.58 , 1.155 sec , sec (Spec # 111475)

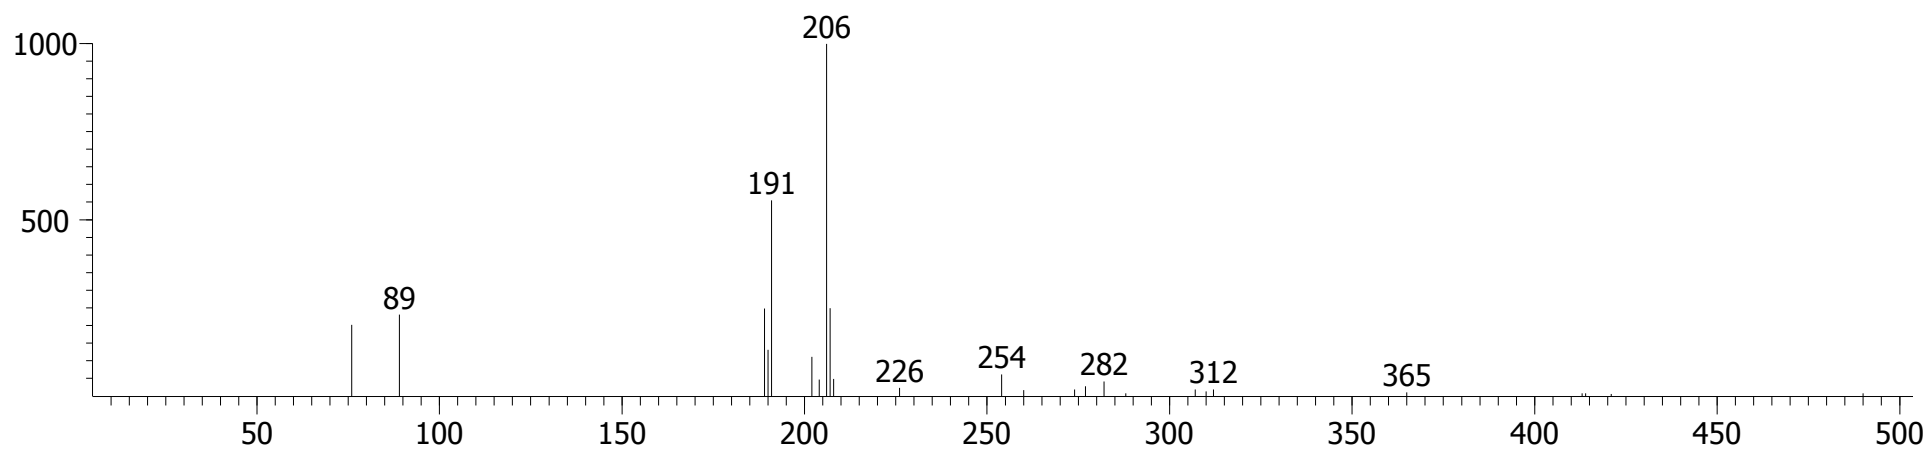

Library Hit - similarity 832, "Phenanthrene, 2,3-dimethyl-"

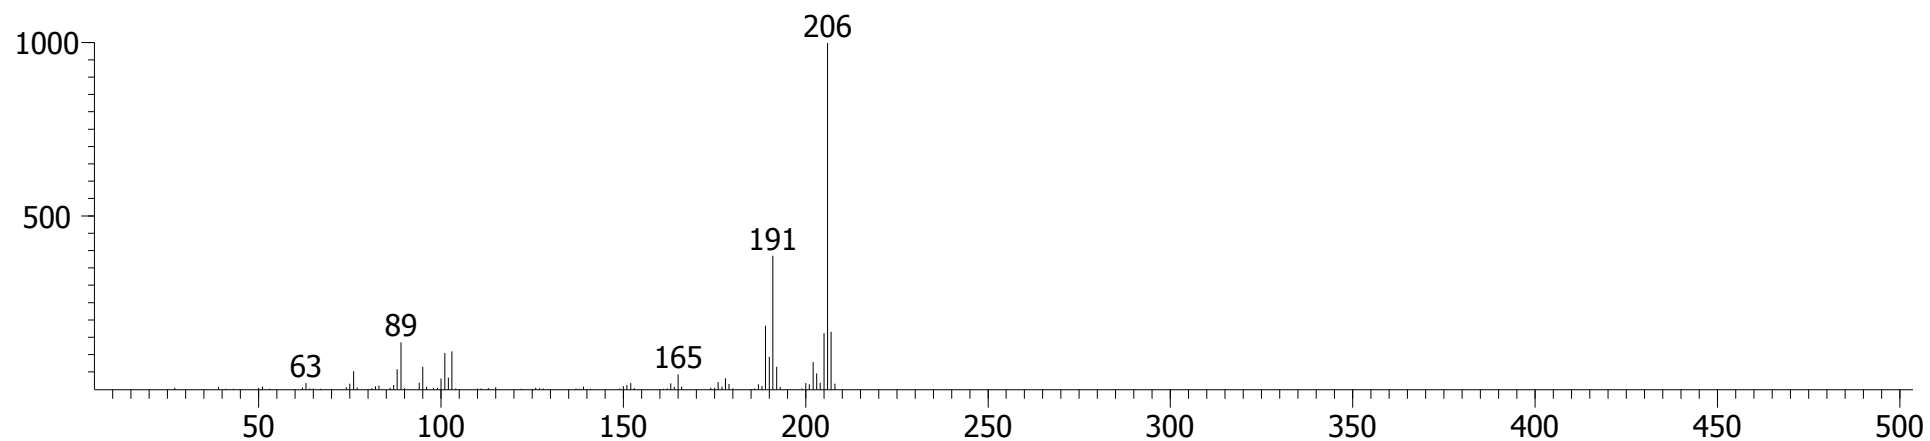

# Sample 1, Fraction 2 (DCM)

## Triphenylphosphine oxide

CAS # = 791-28-6  
1st Dimension R.T. = 1579.44  
2nd Dimension R.T. = 1.690  
Quant Mass(es) = 277  
S/N = 378.50  
Area = 41148  
Height = 4522.3

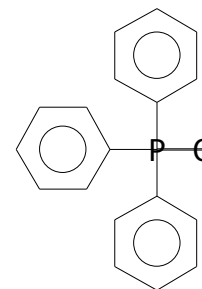

Peak True - sample "Lipid BM 1 F2:1", peak 2490, at 1579.44 , 1.690 sec , sec (Spec # 148656)

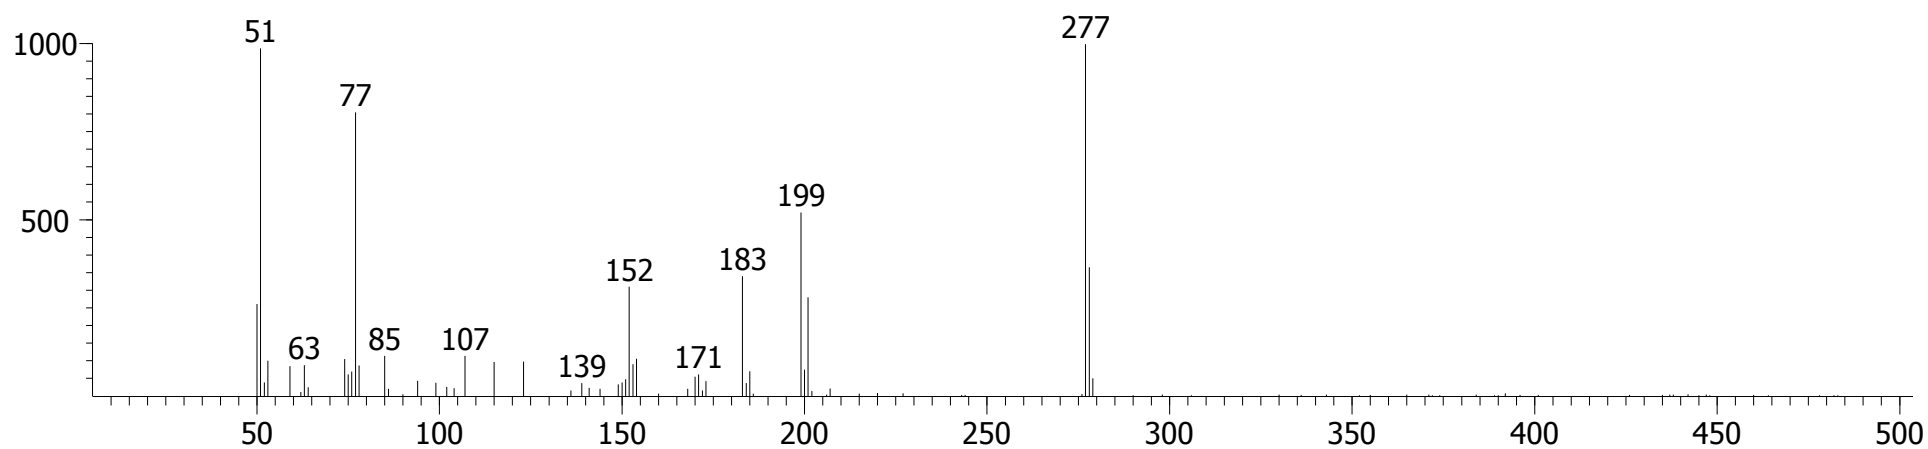

Library Hit - similarity 829, "Triphenylphosphine oxide"

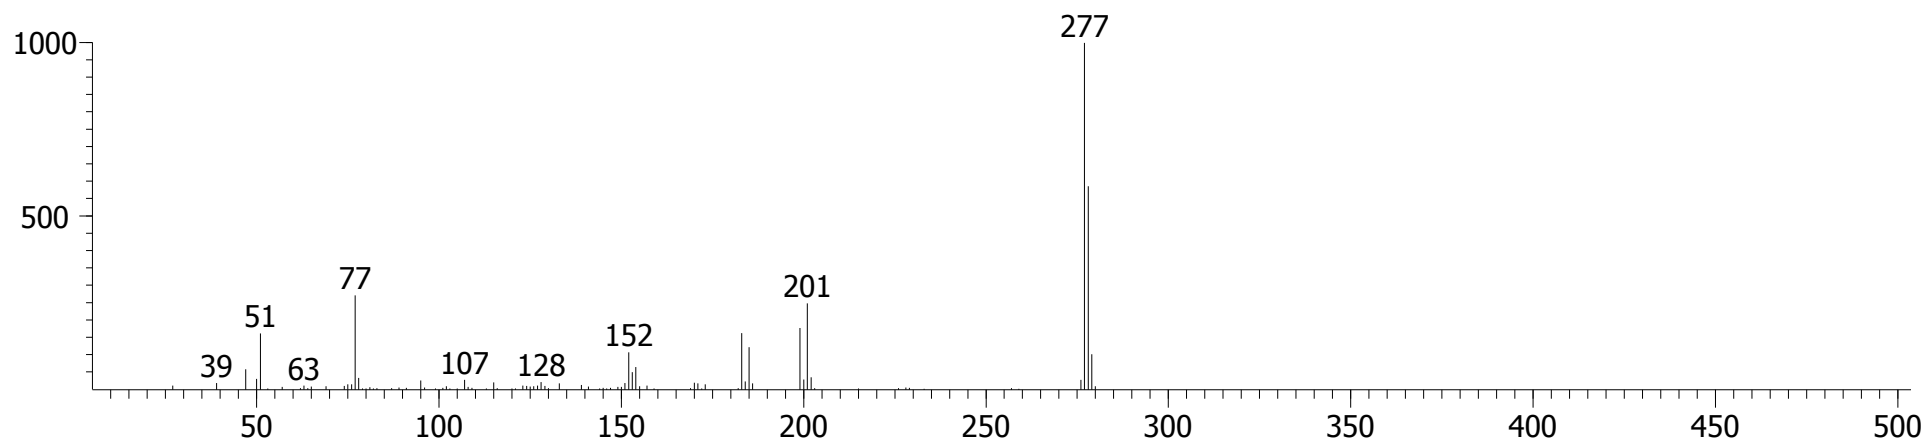

Sample 1, Fraction 2 (DCM)

2,6-Pyridinedicarboxylic acid

CAS # = 499-83-2  
1st Dimension R.T. = 1701.87  
2nd Dimension R.T. = 1.247  
Quant Mass(es) = 123  
S/N = 404.45  
Area = 53978  
Height = 5419.7

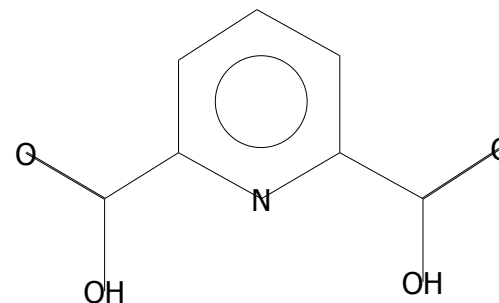

Peak True - sample "Lipid BM 1 F2:1", peak 2750, at 1701.87 , 1.247 sec , sec (Spec # 167139)

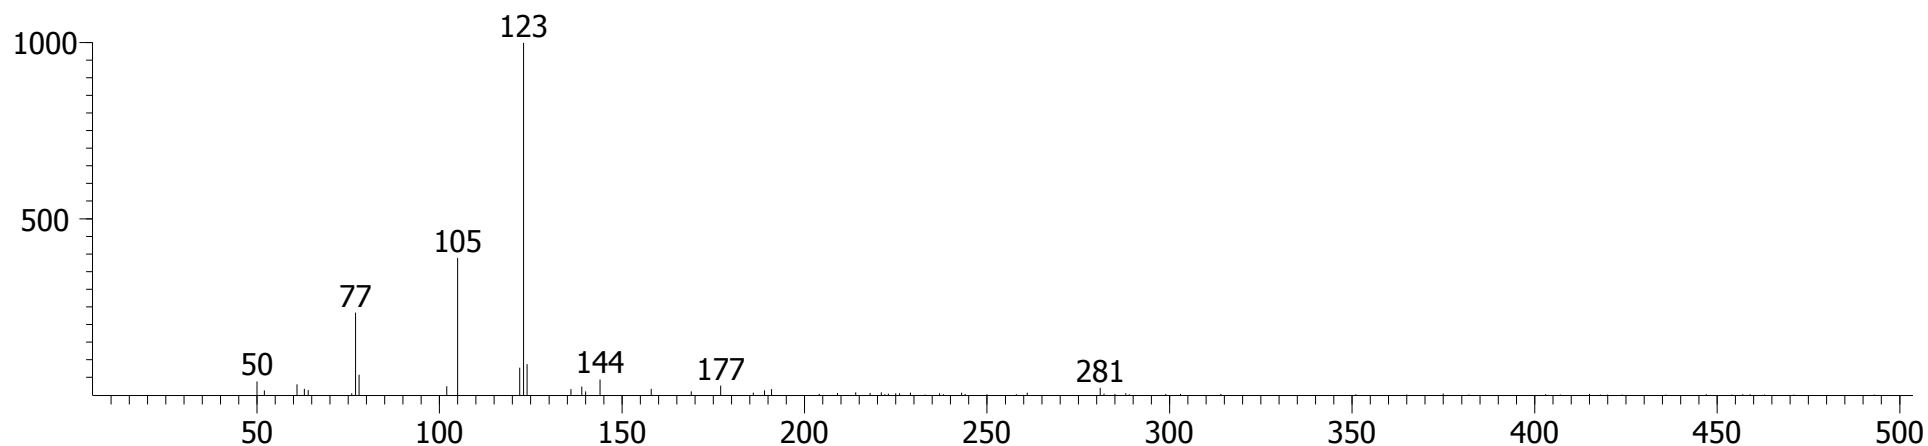

Library Hit - similarity 851, "2,6-Pyridinedicarboxylic acid"

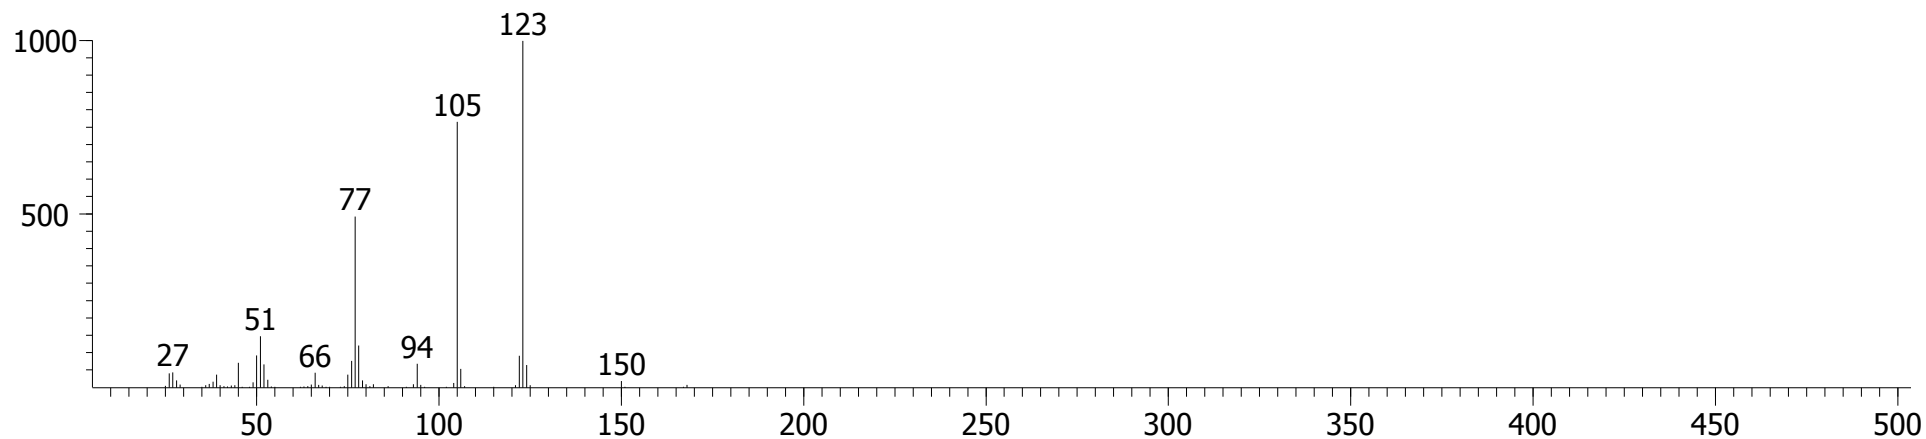

Sample 1, Fraction 3 (Water)

Benzene, 1-chloro-4-(methylthio)-

CAS # = 123-09-1  
1st Dimension R.T. = 809.88  
2nd Dimension R.T. = 0.970  
Quant Mass(es) = 158  
S/N = 1035.1  
Area = 123164  
Height = 26280

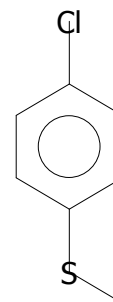

(4-Chlorothioanisole)

Peak True - sample "BM Water 1:1", peak 314, at 809.88 , 0.970 sec , sec (Spec # 31947)

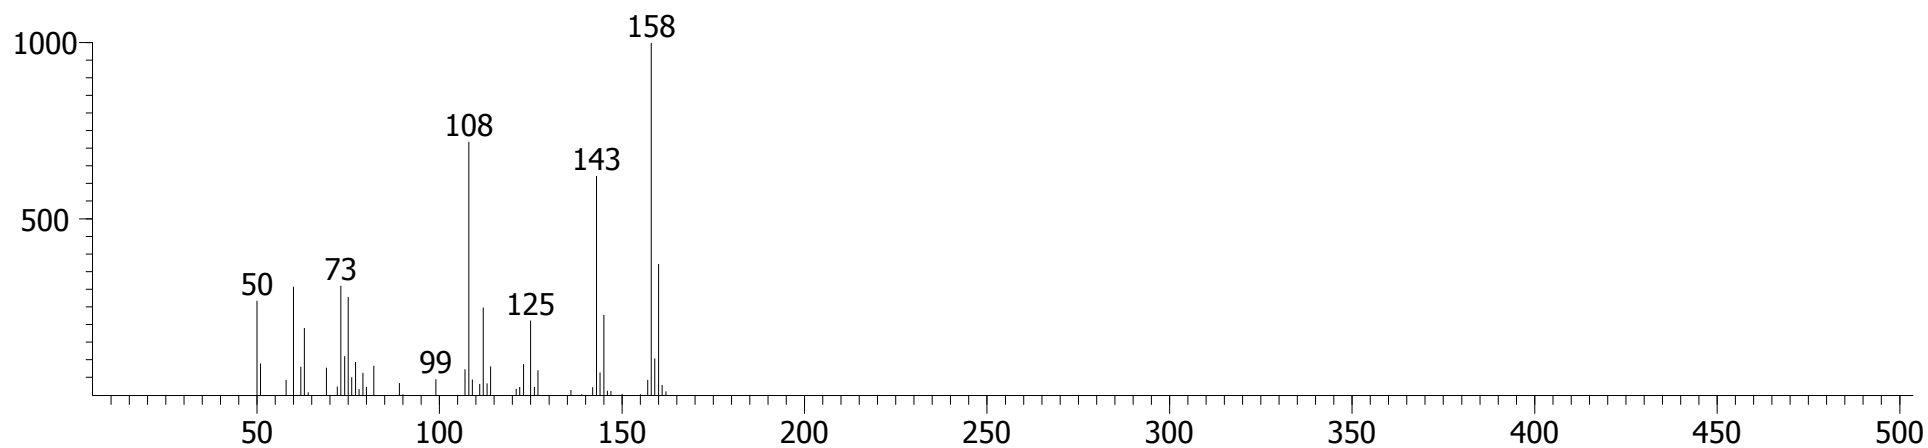

Library Hit - similarity 880, "Benzene, 1-chloro-4-(methylthio)-"

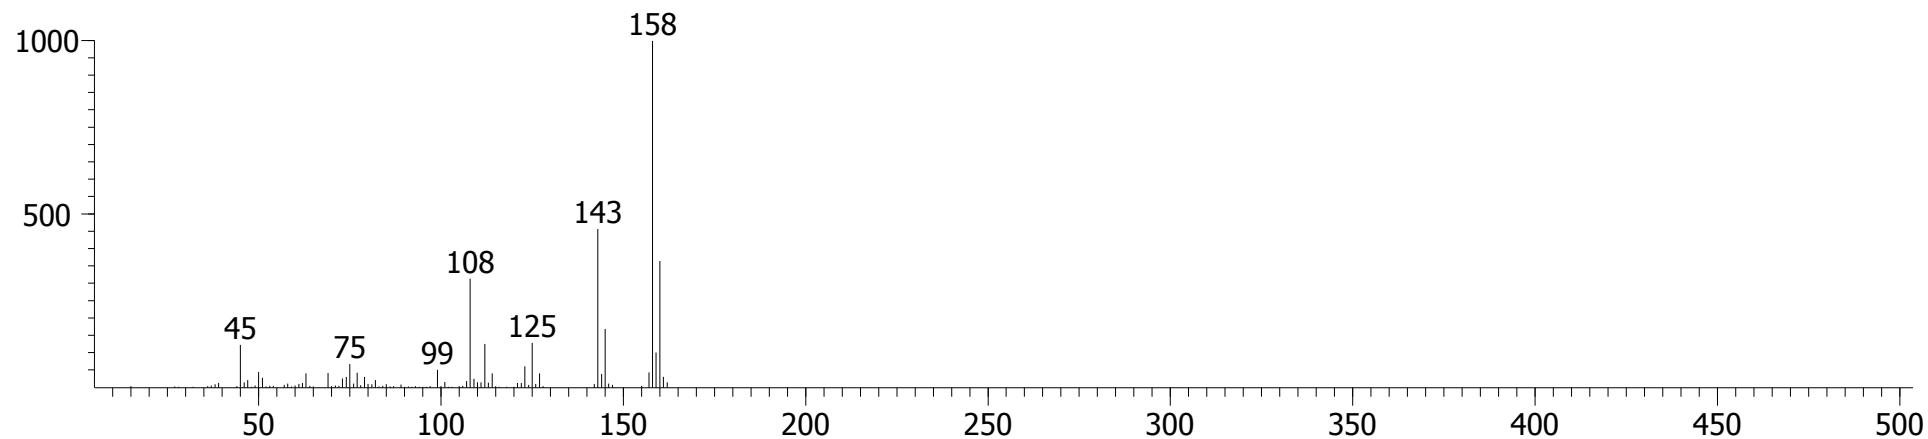

Sample 1, Fraction 3 (Water)

Benzenamine, 4-chloro-N-methyl-

CAS # = 932-96-7  
1st Dimension R.T. = 830.868  
2nd Dimension R.T. = 0.997  
Quant Mass(es) = 140  
S/N = 5796.2  
Area = 2431670  
Height = 435599



(4-Chloro-N-methylaniline)

Peak True - sample "BM Water 1:1", peak 354, at 830.868 , 0.997 sec , sec (Spec # 35131)

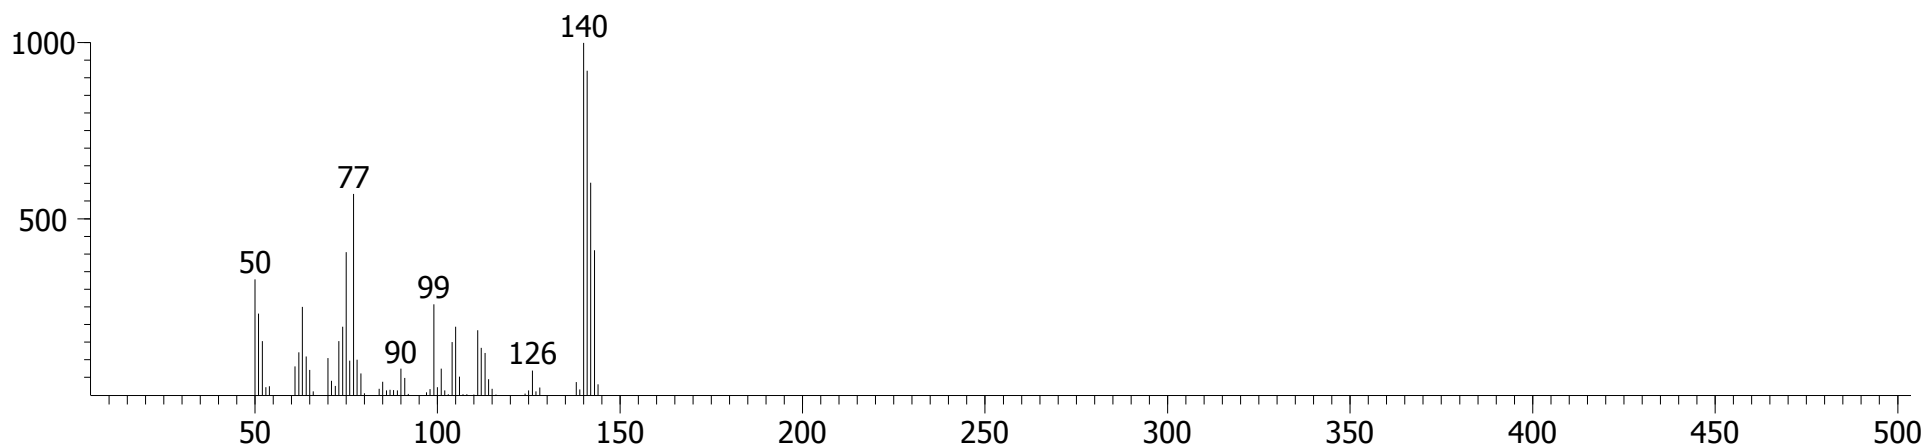

Library Hit - similarity 897, "Benzenamine, 4-chloro-N-methyl-"

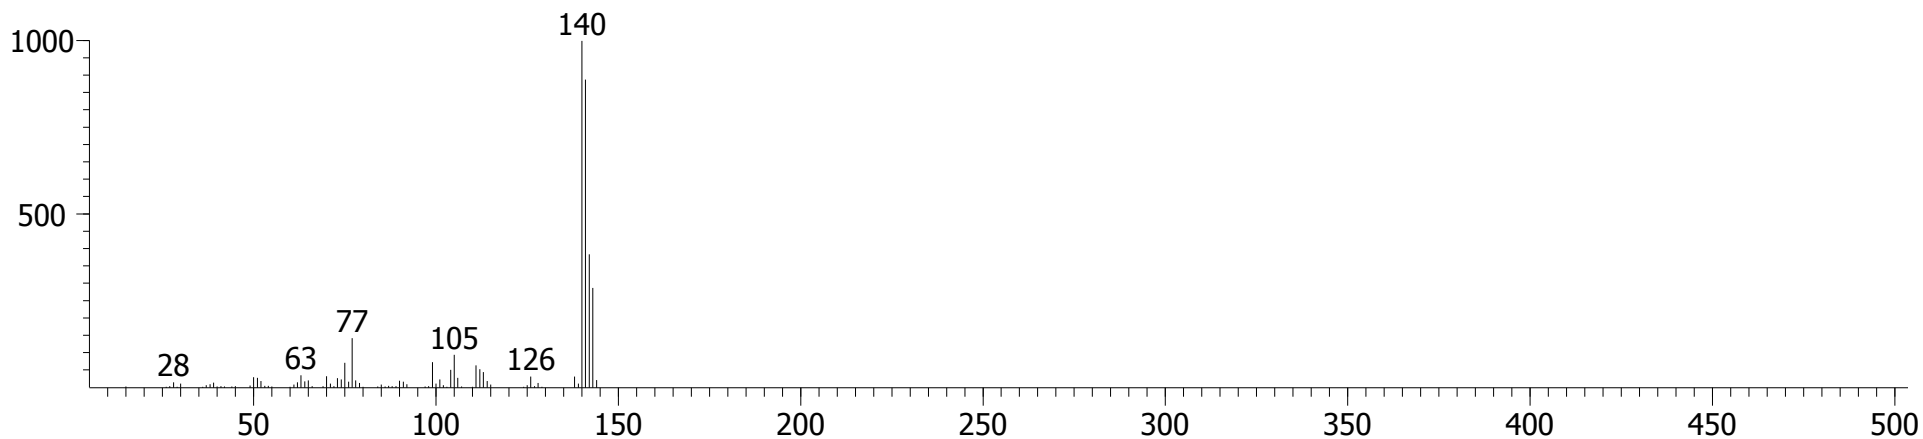



# Sample 1, Fraction 3 (Water)

## 5H-1-Pyridine

CAS # = 270-91-7  
1st Dimension R.T. = 834.366  
2nd Dimension R.T. = 1.056  
Quant Mass(es) = 117  
S/N = 526.09  
Area = 95925  
Height = 18387



Peak True - sample "BM Water 1:1", peak 361, at 834.366 , 1.056 sec , sec (Spec # 35670)

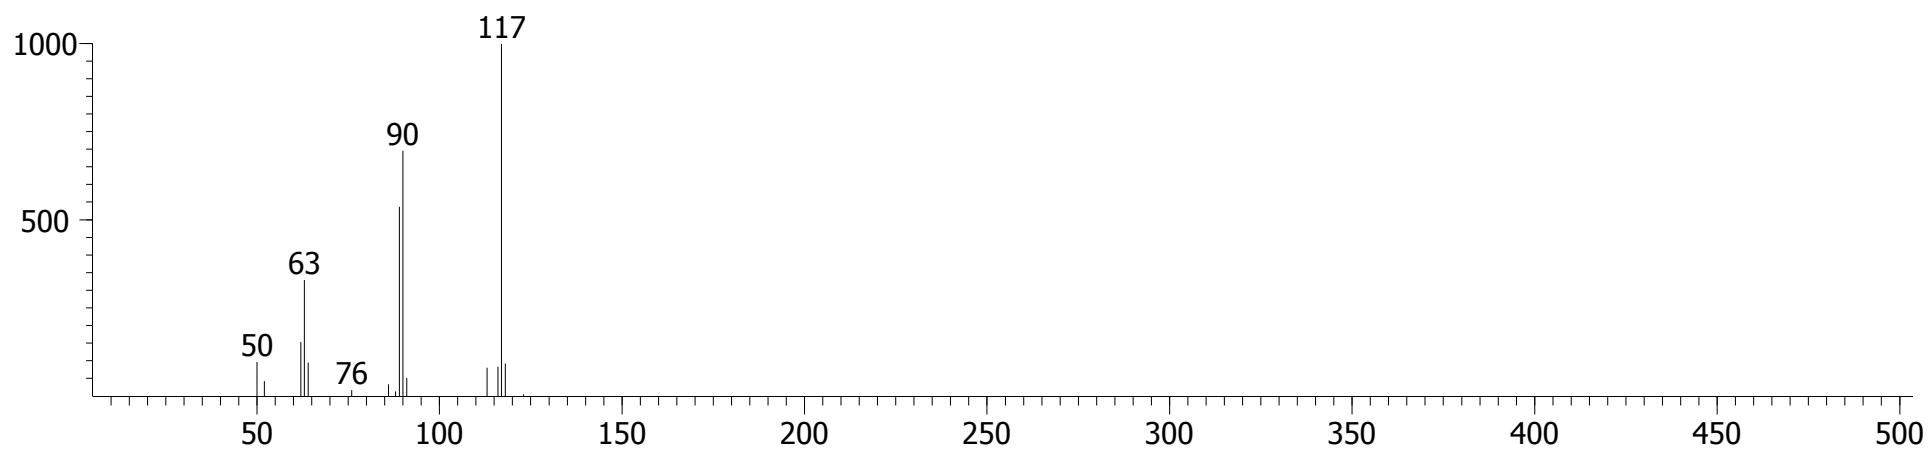

Library Hit - similarity 925, "5H-1-Pyridine"



Sample 1, Fraction 3 (Water)

3-Chloro-N,N-dimethylaniline

CAS # = 6848-13-1  
1st Dimension R.T. = 841.362  
2nd Dimension R.T. = 0.970  
Quant Mass(es) = 154  
S/N = 438.53  
Area = 38416  
Height = 7594.0

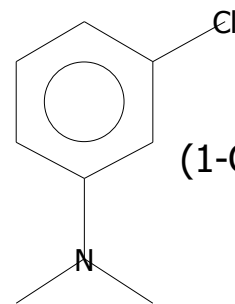

(1-Chloro-3-dimethylaminobenzene)

Peak True - sample "BM Water 1:1", peak 370, at 841.362 , 0.970 sec , sec (Spec # 36717)

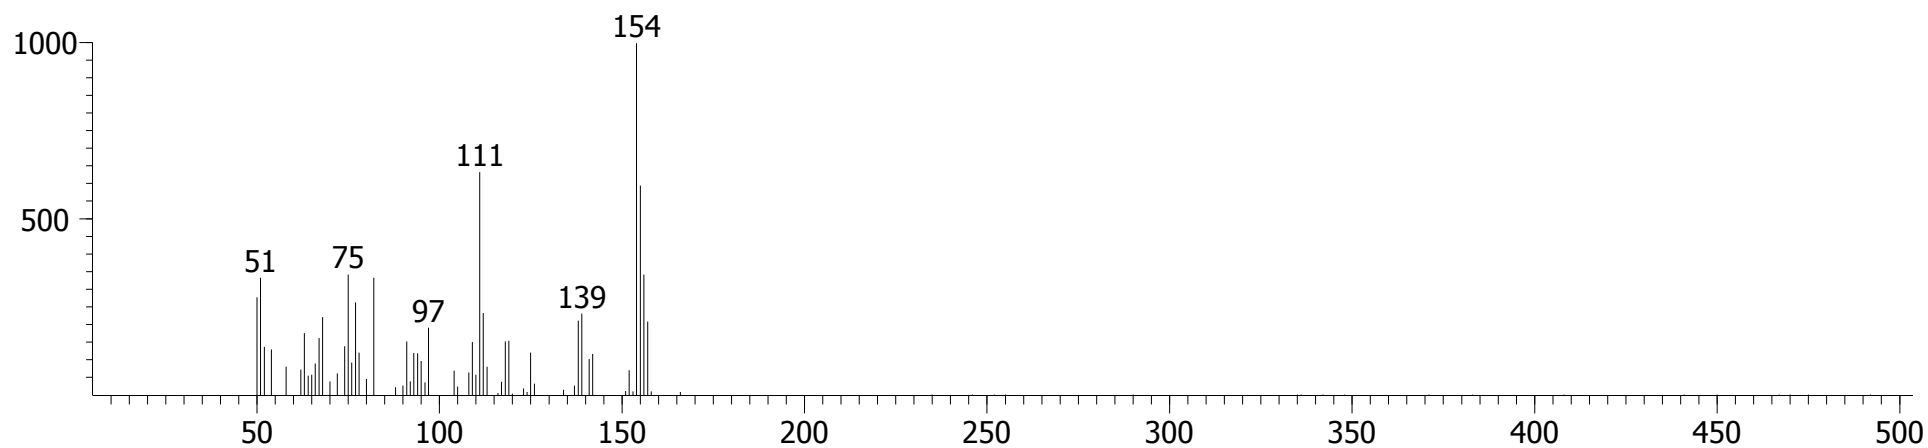

Library Hit - similarity 721, "3-Chloro-N,N-dimethylaniline"

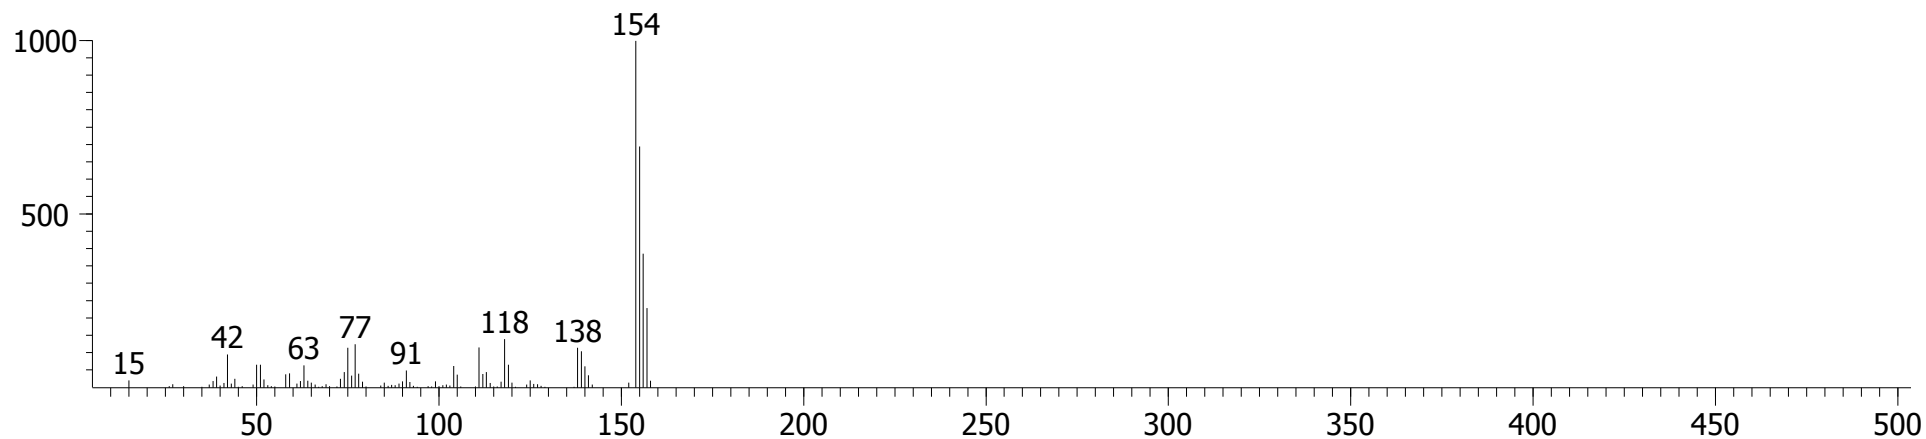

# Sample 1, Fraction 3 (Water)

## Benzaldehyde, 4-hydroxy-

CAS # = 123-08-0  
1st Dimension R.T. = 879.84  
2nd Dimension R.T. = 1.076  
Quant Mass(es) = 122  
S/N = 113.96  
Area = 23908  
Height = 3197.9

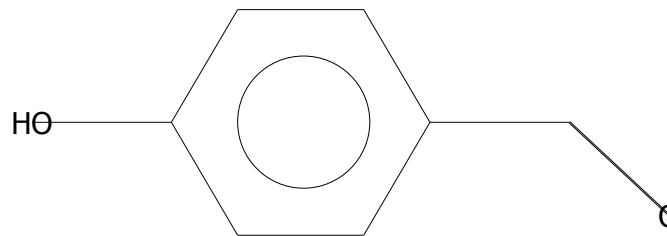

Peak True - sample "BM Water 1:1", peak 436, at 879.84 , 1.076 sec , sec (Spec # 42563)

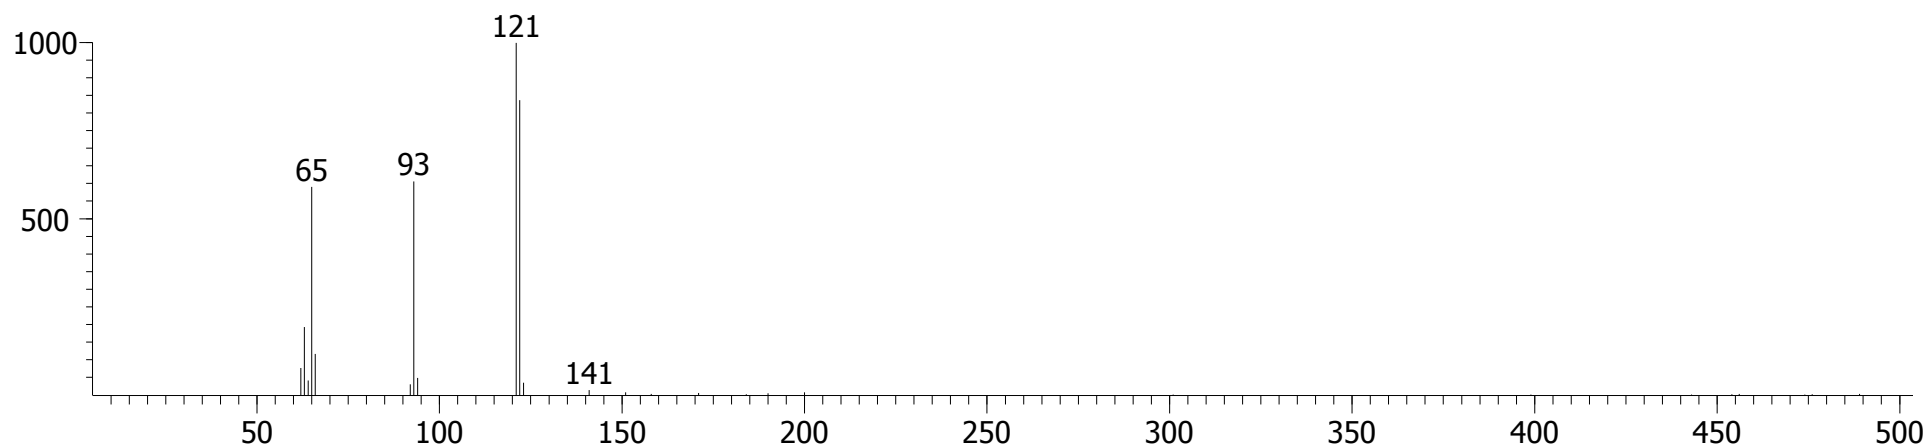

Library Hit - similarity 902, "Benzaldehyde, 4-hydroxy-"

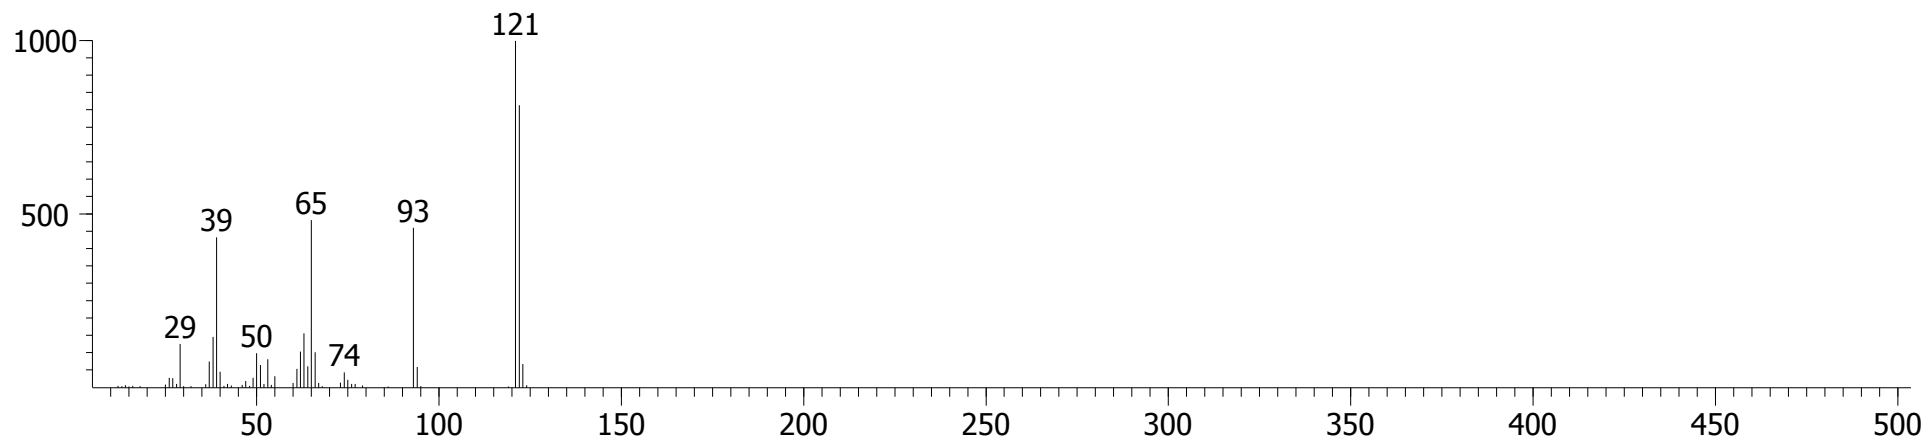

Sample 1, Fraction 3 (Water)

Benzoic acid, 2-(hydroxymethyl)-

CAS # = 612-20-4  
1st Dimension R.T. = 883.338  
2nd Dimension R.T. = 1.096  
Quant Mass(es) = 134  
S/N = 177.13  
Area = 14595  
Height = 2611.4

(2-Hydroxymethylbenzoic acid)

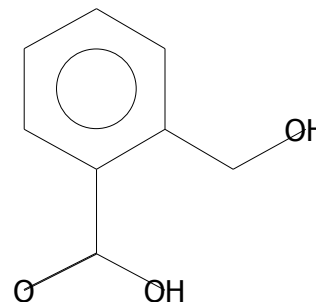

Peak True - sample "BM Water 1:1", peak 441, at 883.338 , 1.096 sec , sec (Spec # 43096)

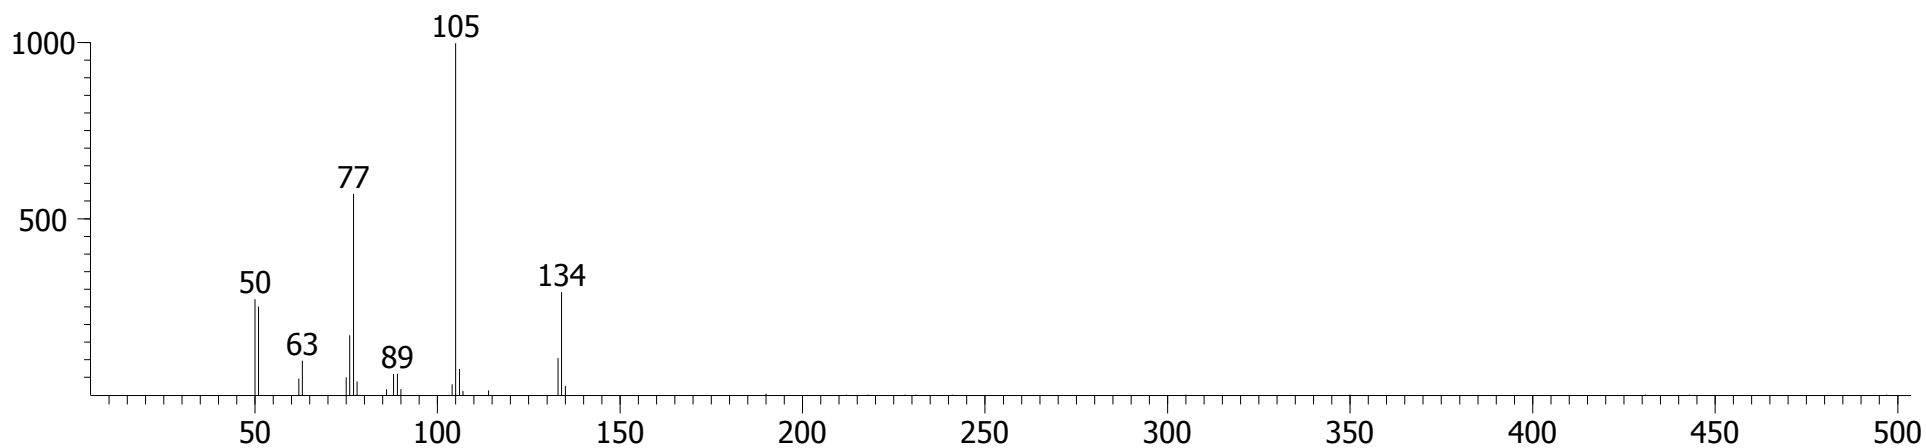

Library Hit - similarity 909, "Benzoic acid, 2-(hydroxymethyl)-"

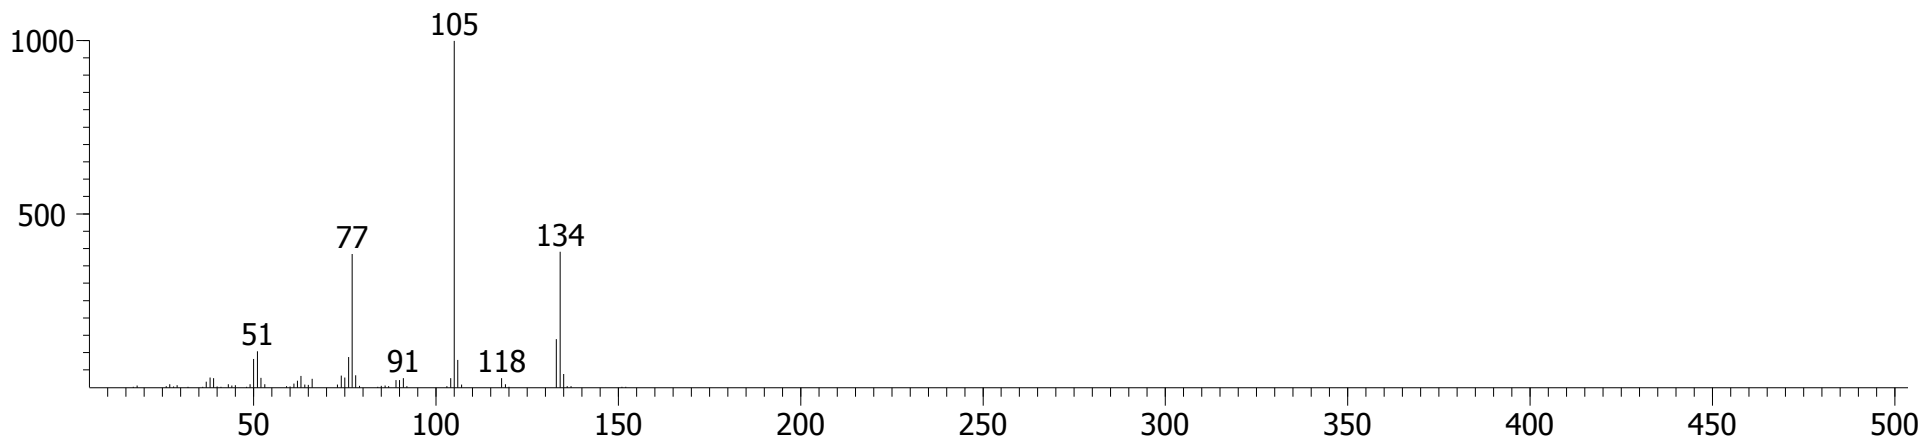

Sample 1, Fraction 3 (Water)

Benzamide

CAS # = 55-21-0  
1st Dimension R.T. = 890.334  
2nd Dimension R.T. = 1.142  
Quant Mass(es) = 121  
S/N = 192.83  
Area = 27163  
Height = 6076.0

(Phenylamide)

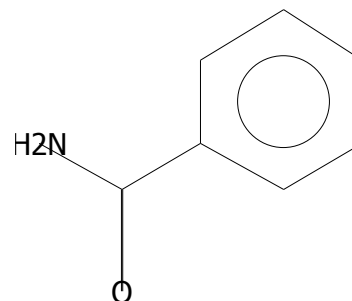

Peak True - sample "BM Water 1:1", peak 463, at 890.334 , 1.142 sec , sec (Spec # 44163)

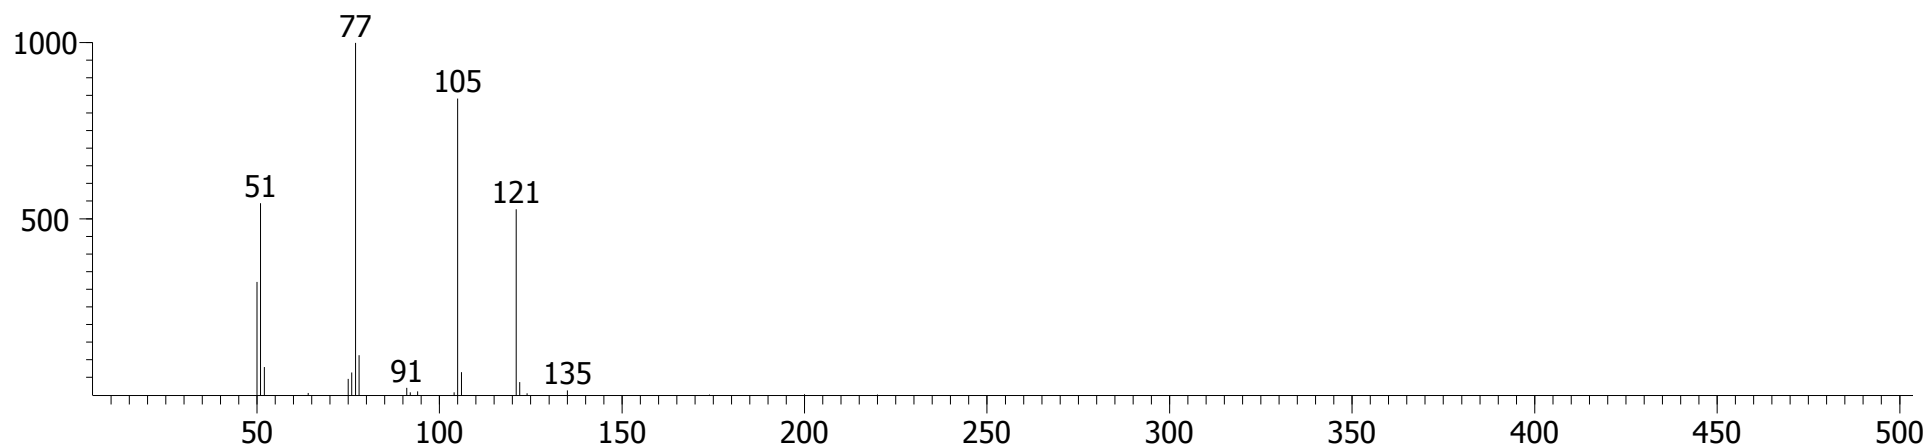

Library Hit - similarity 949, "Benzamide"

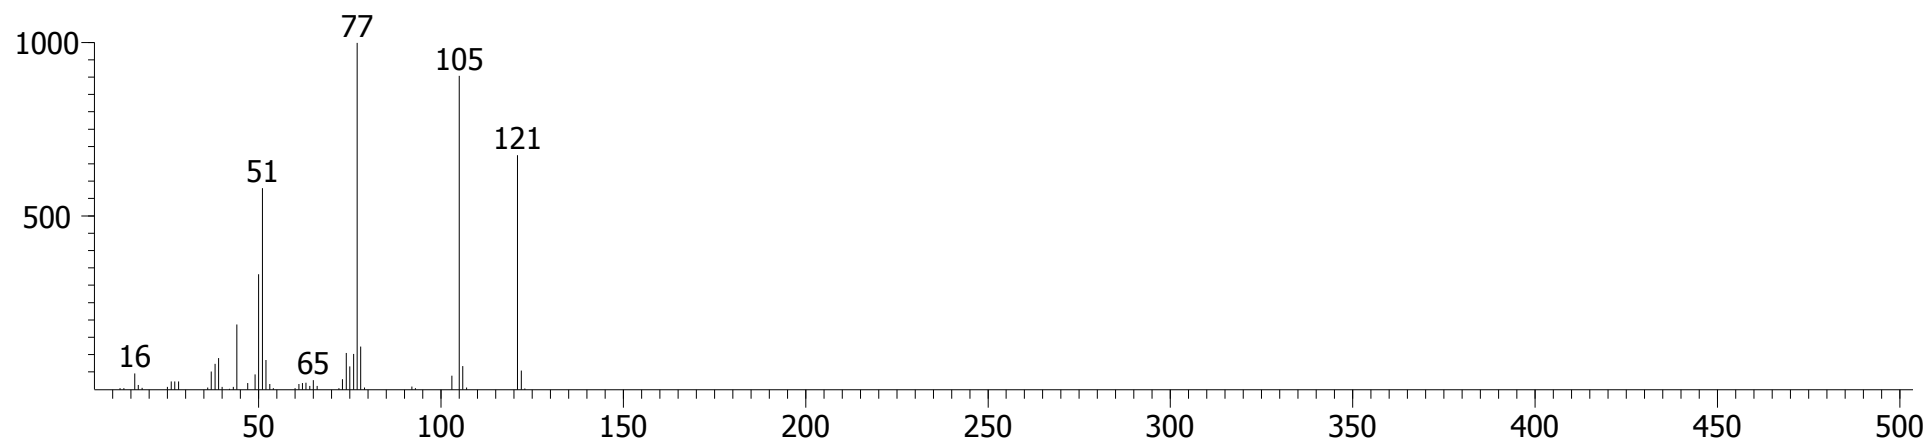

# Sample 1, Fraction 3 (Water)

## Methanol, oxo-, benzoate

CAS # = 0-00-0  
1st Dimension R.T. = 900.828  
2nd Dimension R.T. = 0.891  
Quant Mass(es) = 122  
S/N = 82.492  
Area = 15046  
Height = 2328.3

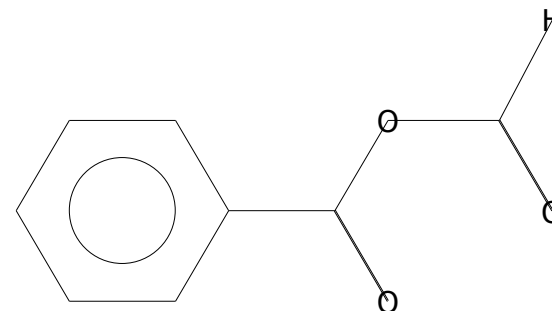

Peak True - sample "BM Water 1:1", peak 485, at 900.828 , 0.891 sec , sec (Spec # 45715)

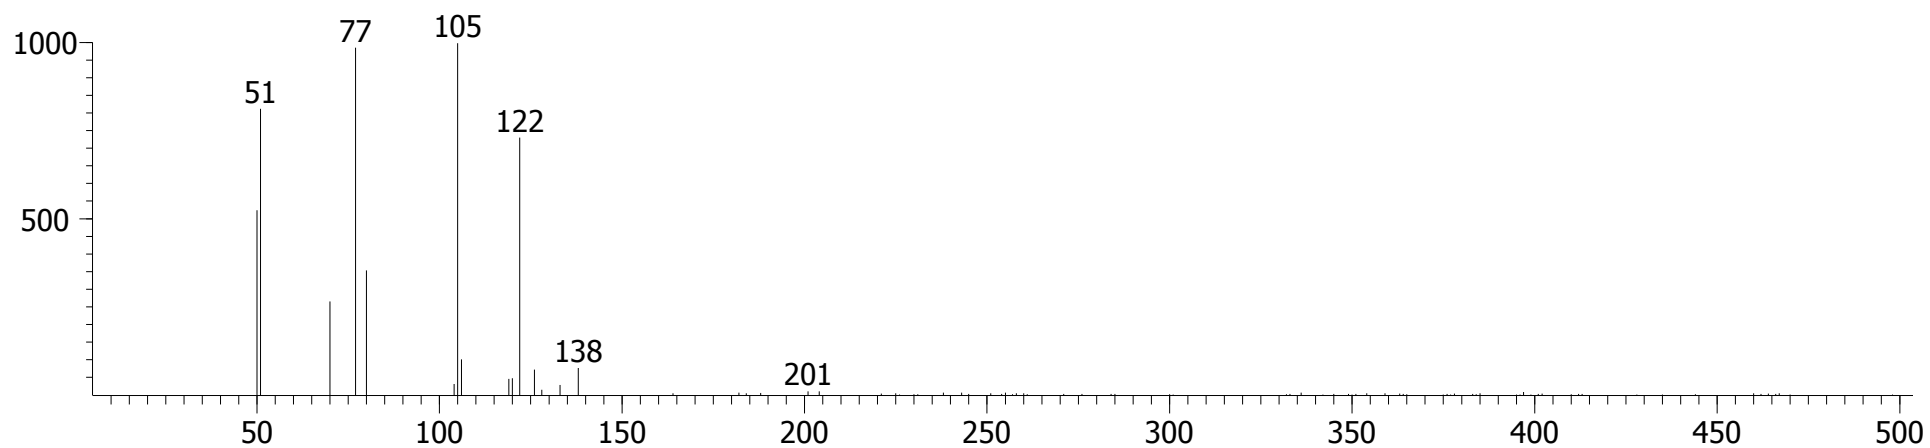

Library Hit - similarity 821, "Methanol, oxo-, benzoate"

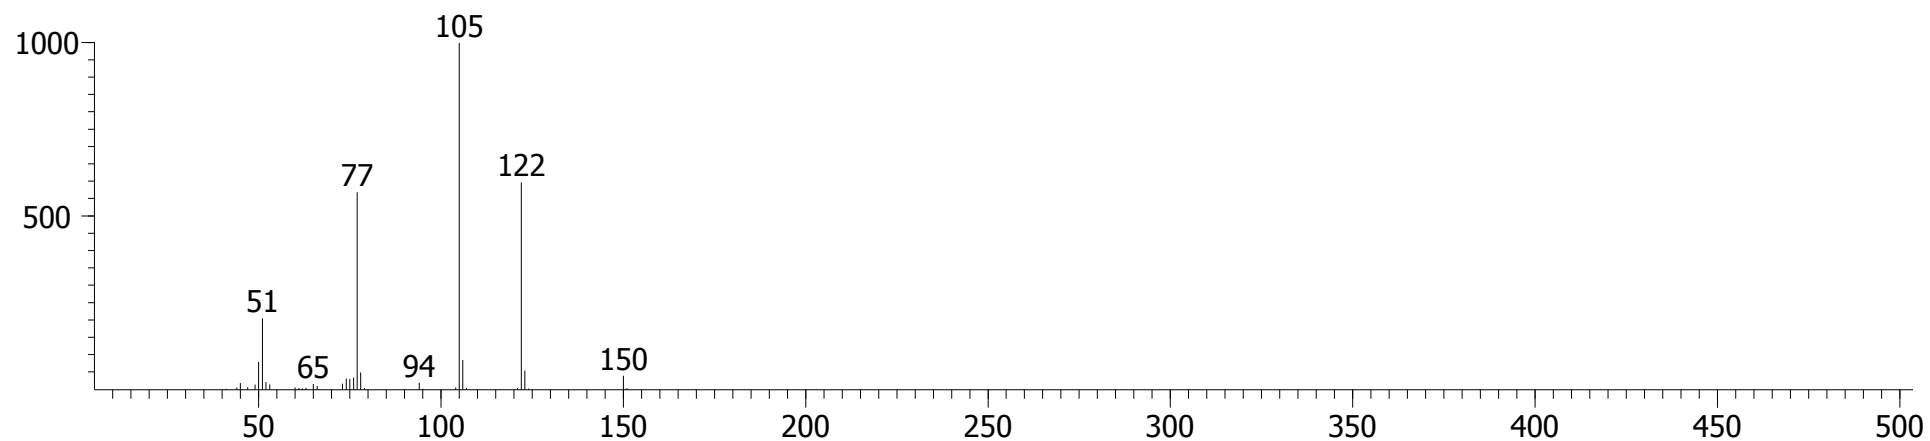

Sample 1, Fraction 3 (Water)

1H-Indole, 2-methyl-

CAS # = 95-20-5  
1st Dimension R.T. = 907.824  
2nd Dimension R.T. = 1.056  
Quant Mass(es) = 130  
S/N = 569.77  
Area = 345257  
Height = 43022

(2-Methylindole)

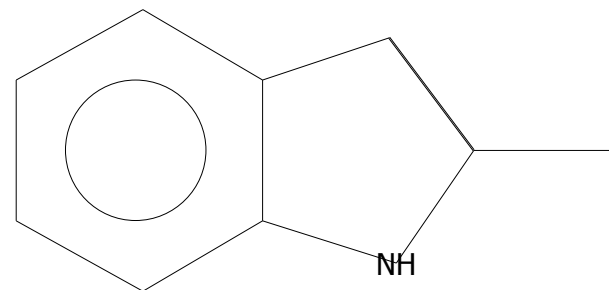

Peak True - sample "BM Water 1:1", peak 504, at 907.824 , 1.056 sec , sec (Spec # 46800)

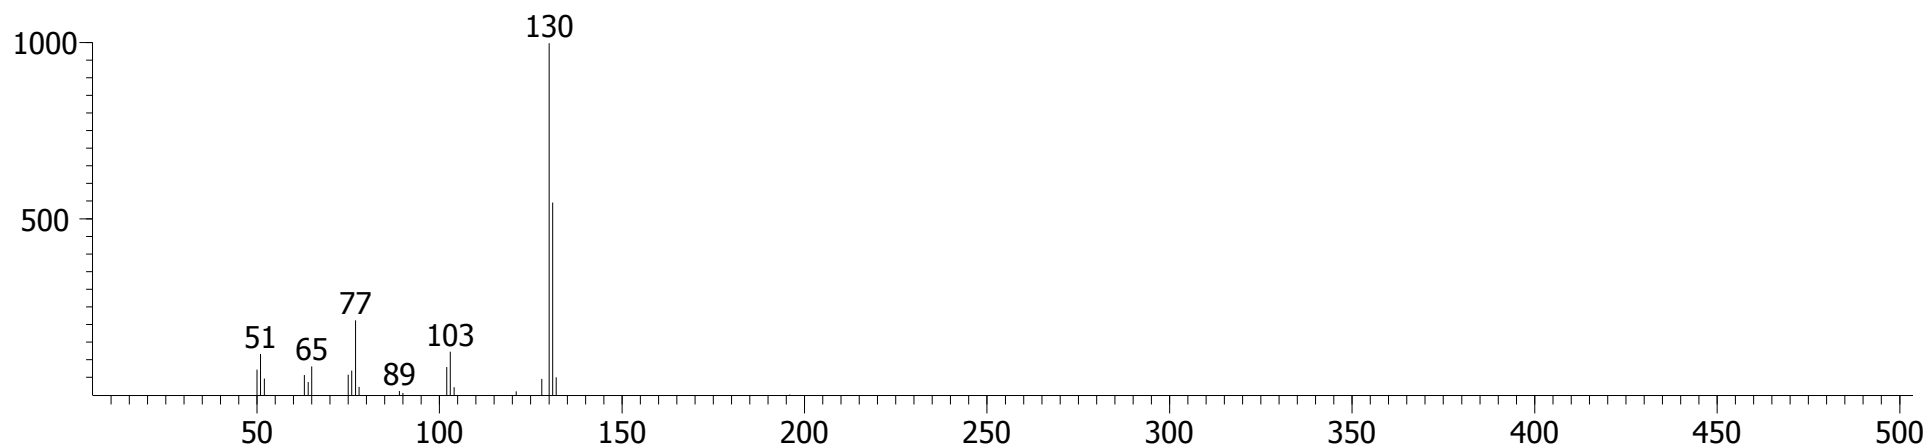

Library Hit - similarity 950, "1H-Indole, 2-methyl-"

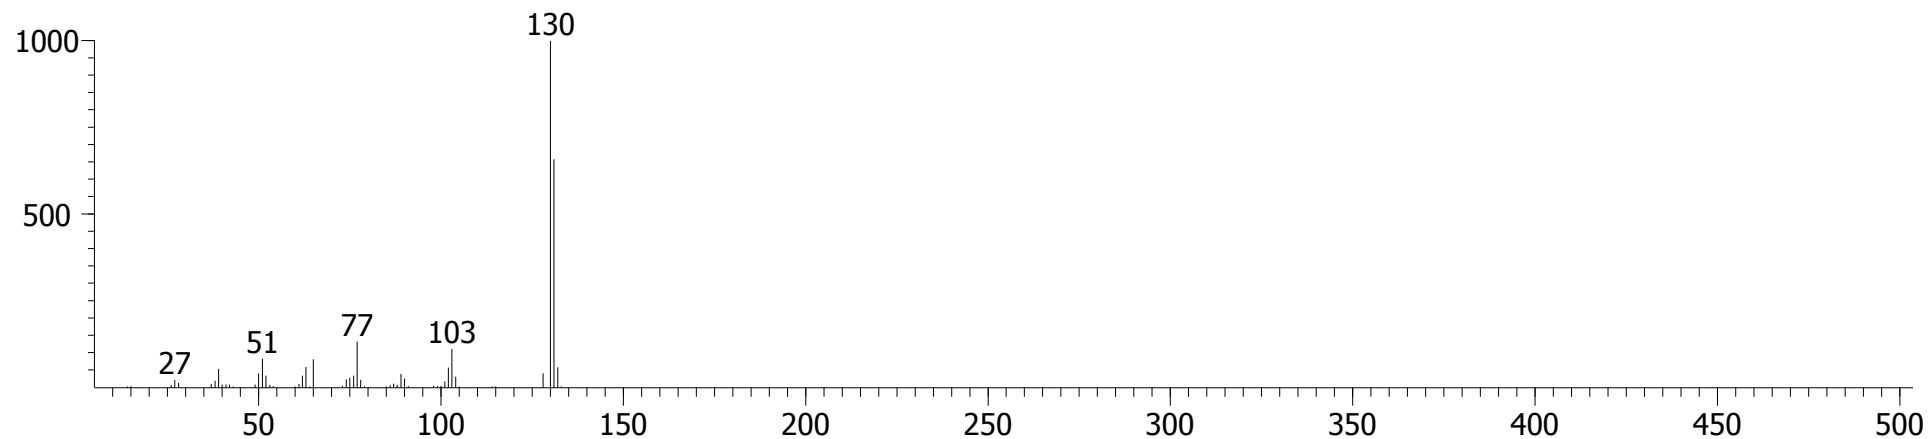

# Sample 1, Fraction 3 (Water)

## Diphenyl ether

CAS # = 101-84-8  
1st Dimension R.T. = 918.318  
2nd Dimension R.T. = 0.990  
Quant Mass(es) = 170  
S/N = 260.76  
Area = 25278  
Height = 5031.1



Peak True - sample "BM Water 1:1", peak 524, at 918.318 , 0.990 sec , sec (Spec # 48380)

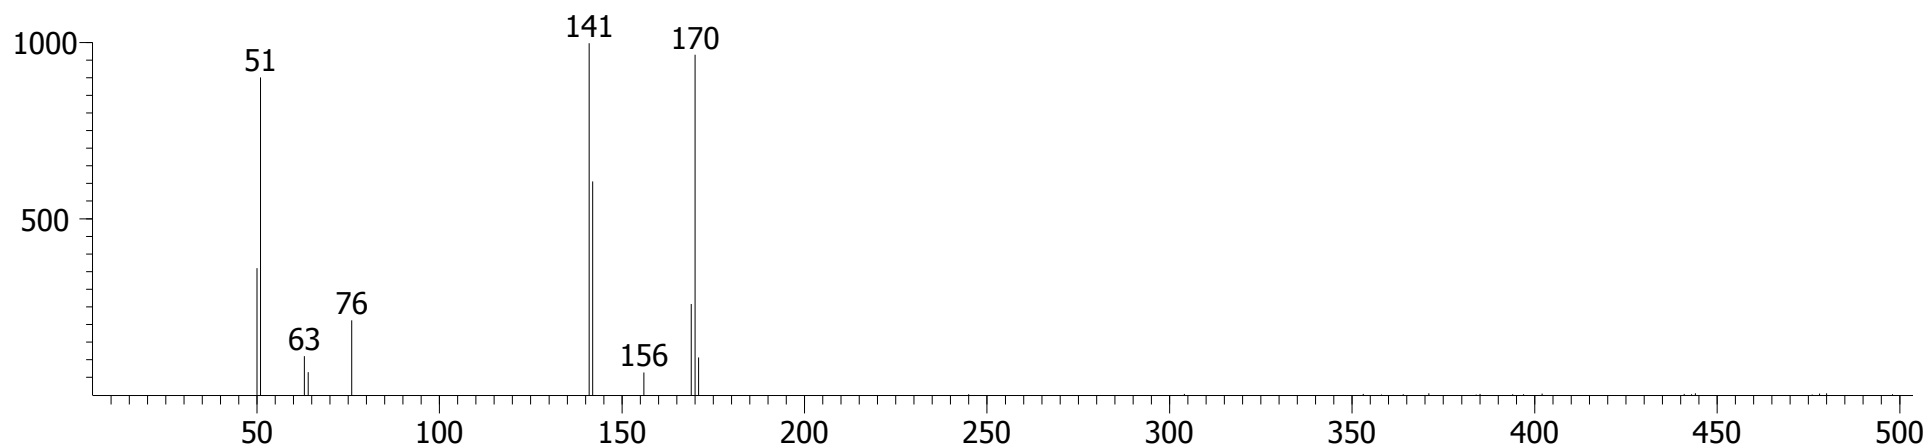

Library Hit - similarity 806, "Diphenyl ether"

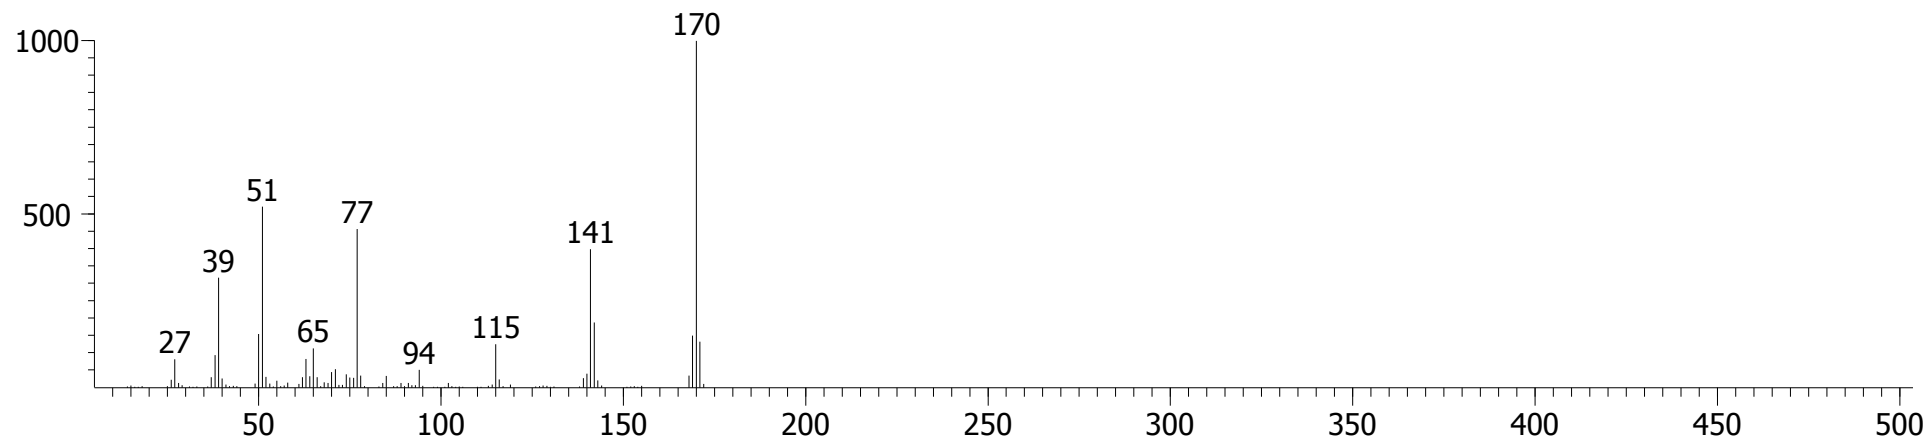



# Sample 1, Fraction 3 (Water)

## N,N-Diethylaniline

CAS # = 91-66-7  
1st Dimension R.T. = 918.318  
2nd Dimension R.T. = 1.096  
Quant Mass(es) = 149  
S/N = 57.770  
Area = 5227.2  
Height = 629.80

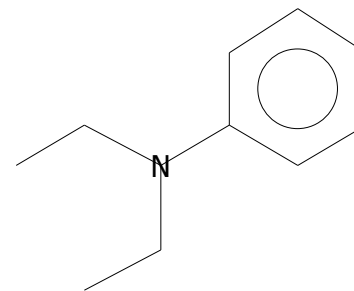

Peak True - sample "BM Water 1:1", peak 527, at 918.318 , 1.096 sec , sec (Spec # 48396)

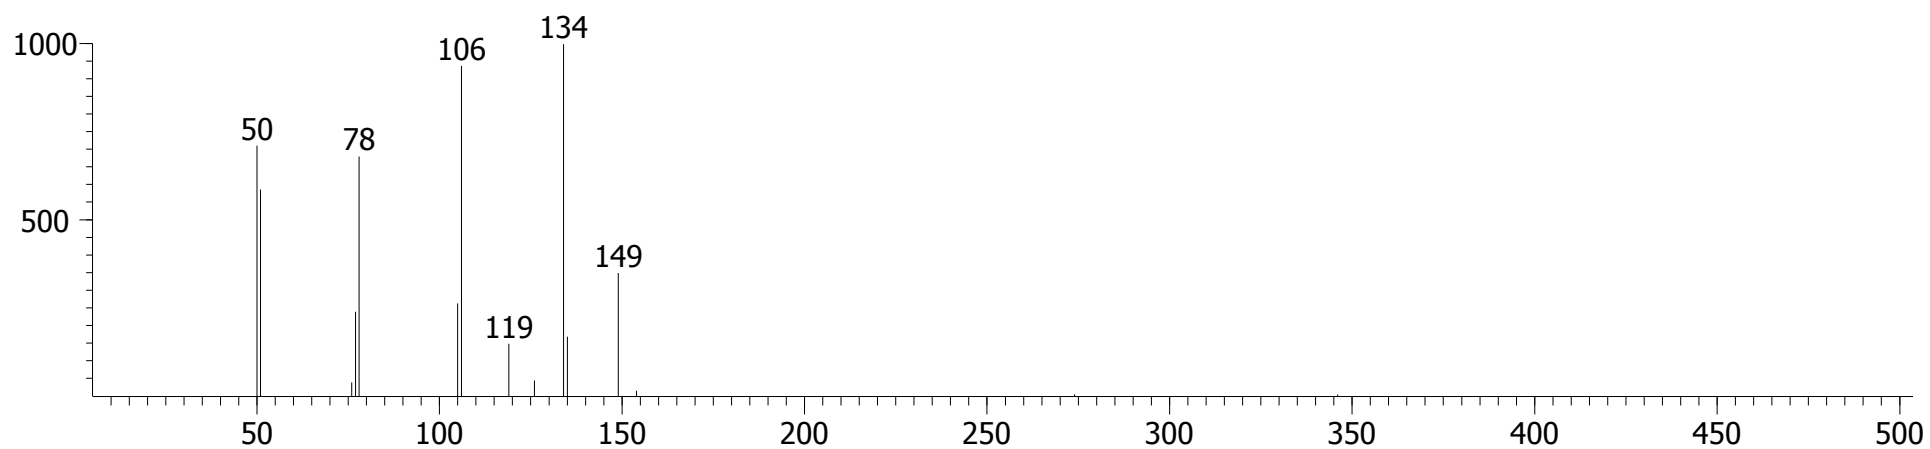

Library Hit - similarity 712, "N,N-Diethylaniline"

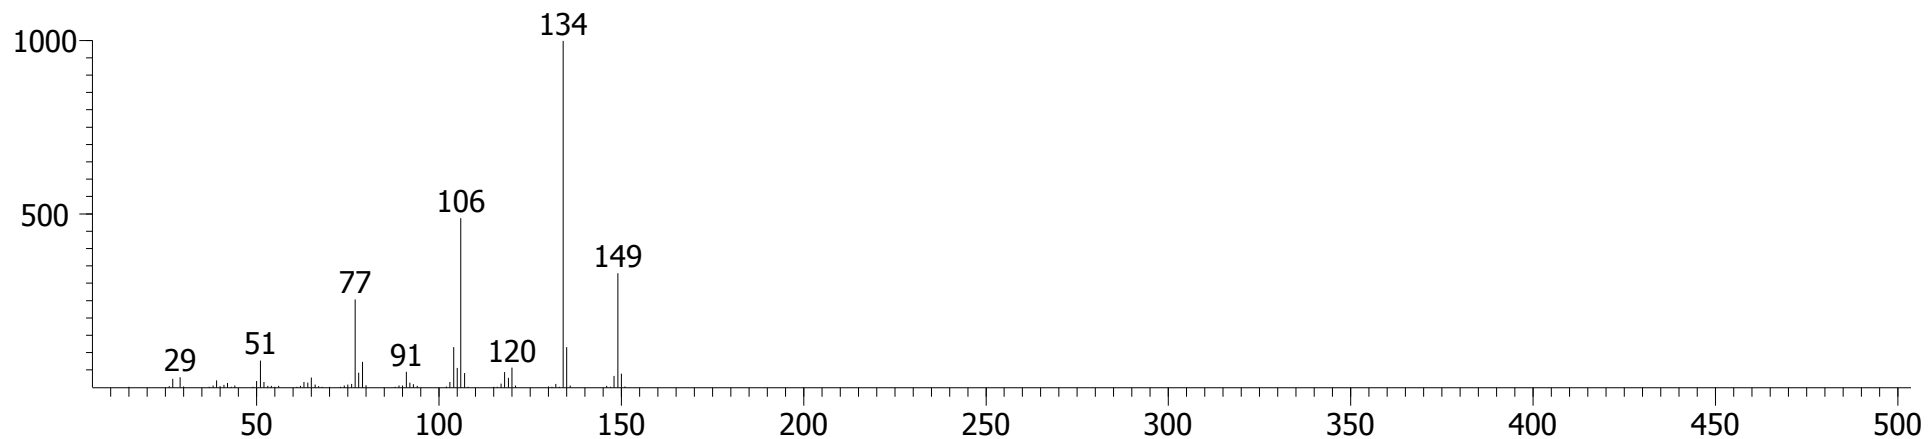

Sample 1, Fraction 3 (Water)

Ethanone, 1,1'-(1,3-phenylene)bis-

CAS # = 6781-42-6  
1st Dimension R.T. = 939.306  
2nd Dimension R.T. = 1.043  
Quant Mass(es) = 162  
S/N = 51.304  
Area = 2868.1  
Height = 412.96

(1,3-Diacetylbenzene)



Peak True - sample "BM Water 1:1", peak 573, at 939.306 , 1.043 sec , sec (Spec # 51568)

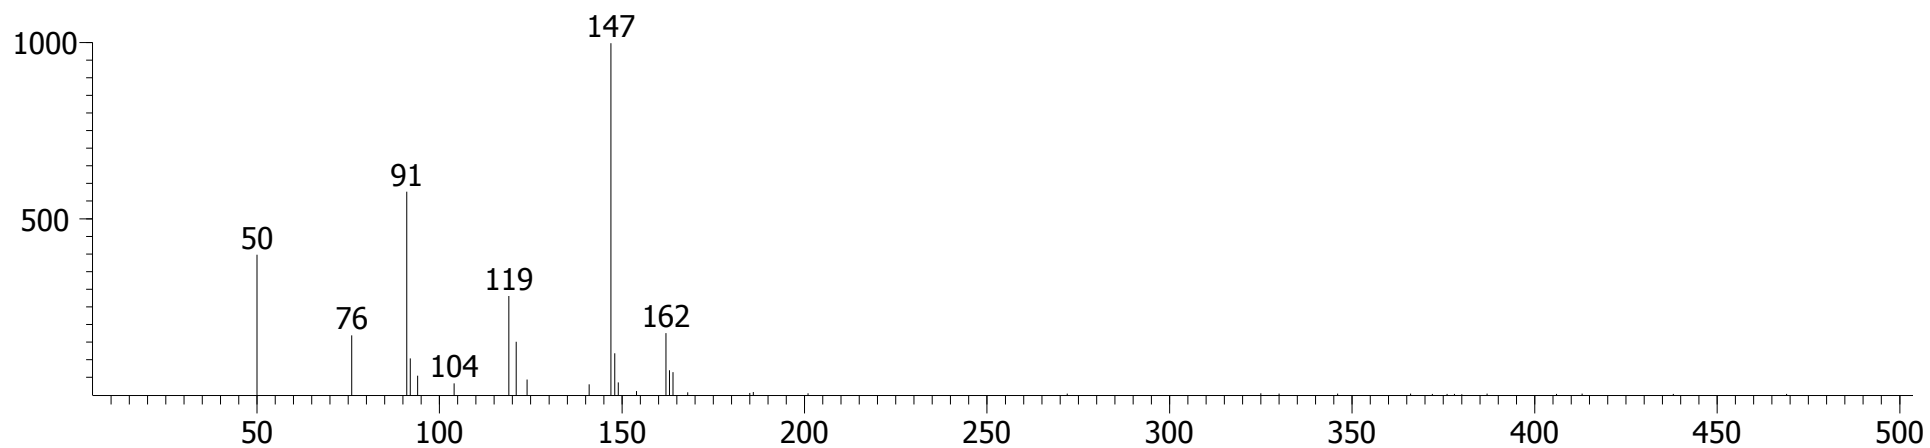

Library Hit - similarity 731, "Ethanone, 1,1'-(1,3-phenylene)bis-"

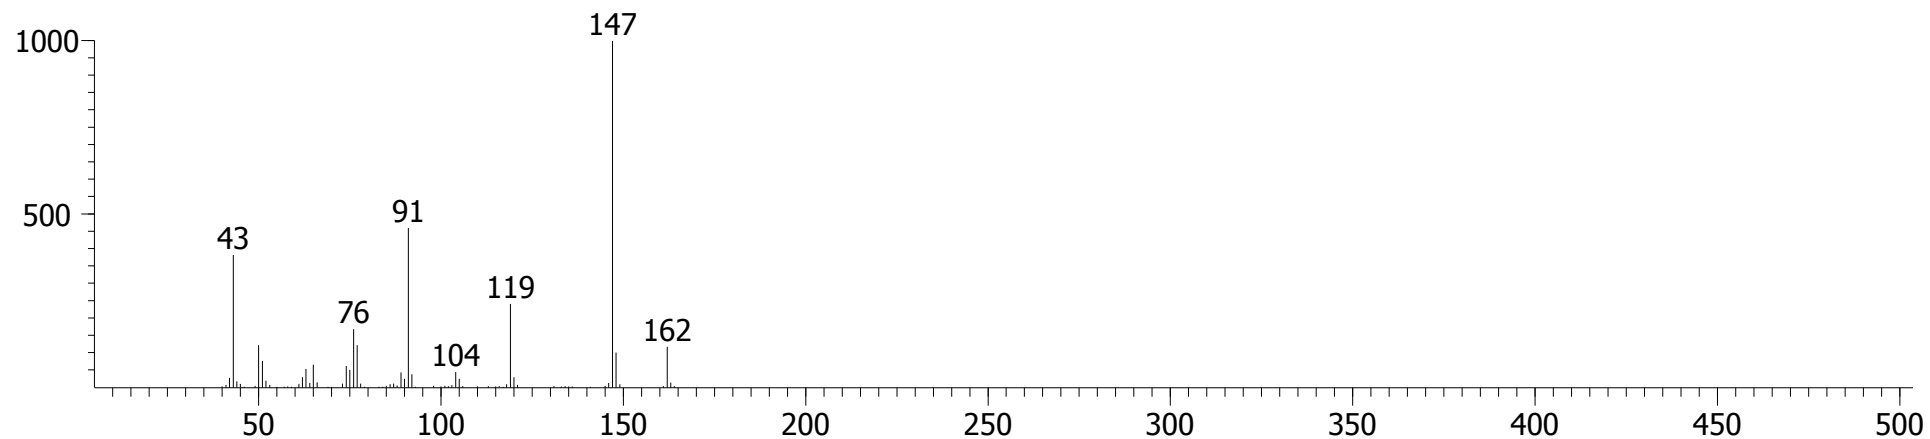

Sample 1, Fraction 3 (Water)

Benzoic acid, 2-(1-oxopropyl)-, methyl ester

CAS # = 32025-37-9

1st Dimension R.T. = 949.8

2nd Dimension R.T. = 1.036

Quant Mass(es) = 163

S/N = 155.00

Area = 33467

Height = 5891.0

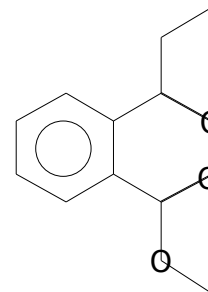

Peak True - sample "BM Water 1:1", peak 594, at 949.8 , 1.036 sec , sec (Spec # 53157)

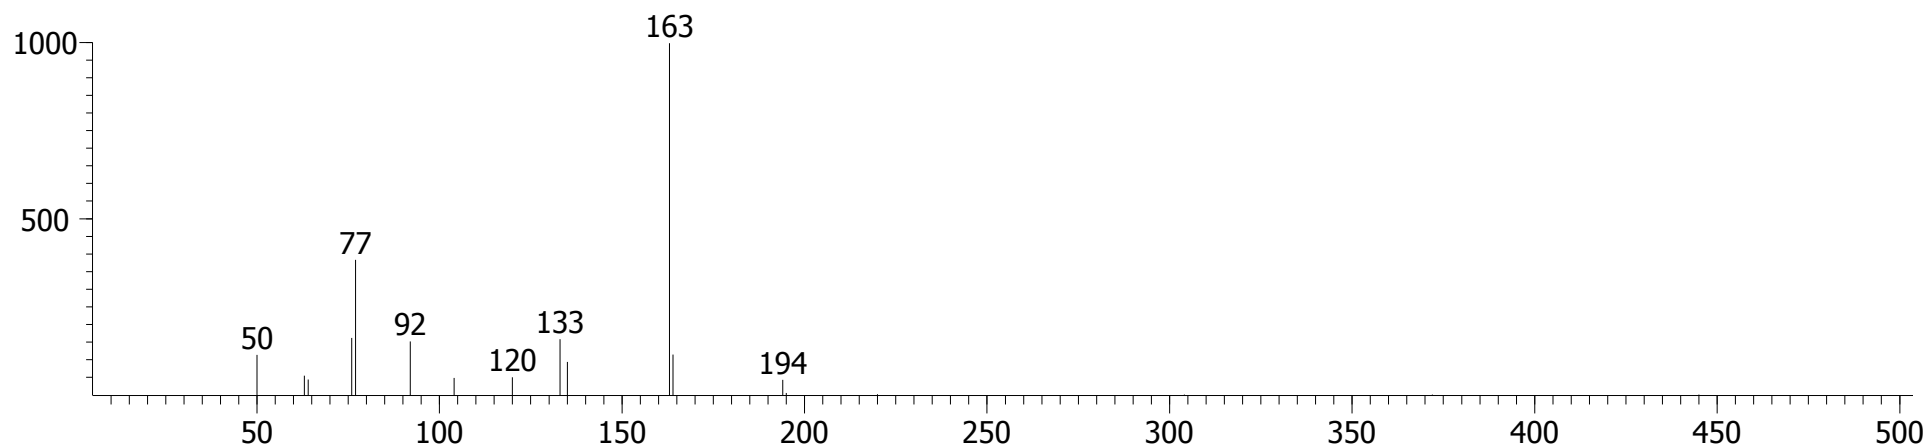

Library Hit - similarity 883, "Benzoic acid, 2-(1-oxopropyl)-, methyl ester"

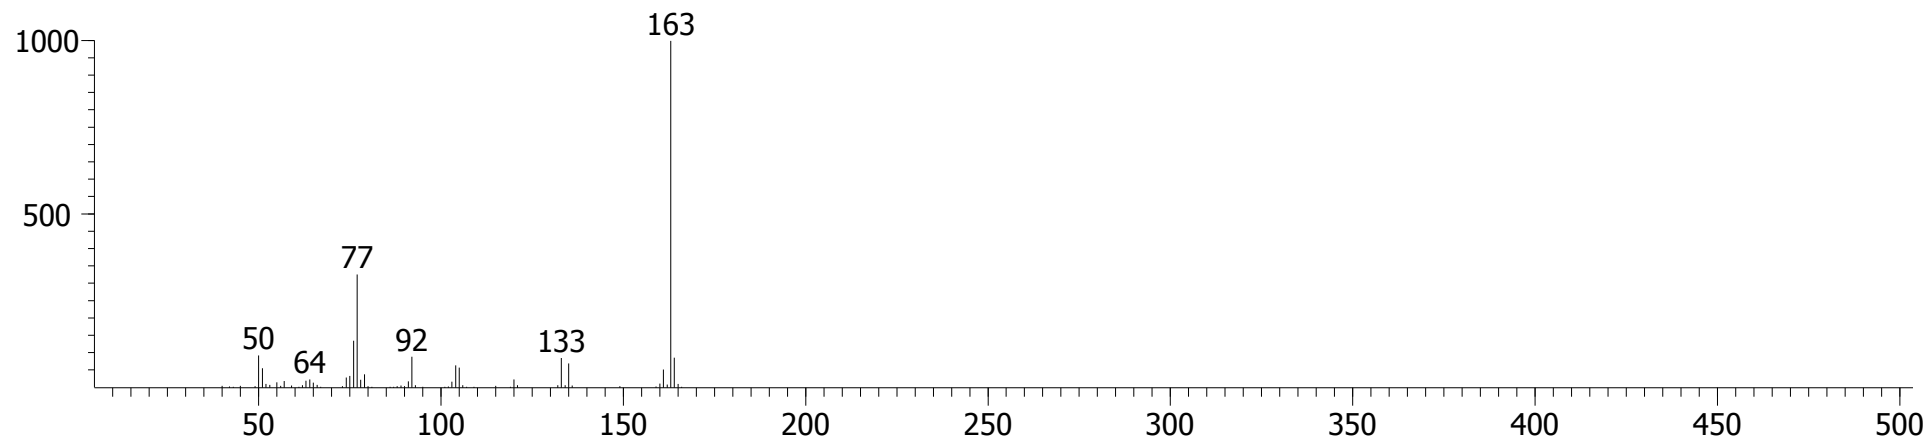

# Sample 1, Fraction 3 (Water)

## 1-Pentanone, 1-phenyl-

CAS # = 1009-14-9  
1st Dimension R.T. = 953.298  
2nd Dimension R.T. = 0.957  
Quant Mass(es) = 120  
S/N = 1194.4  
Area = 216462  
Height = 39364

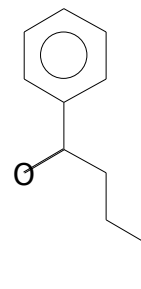

Peak True - sample "BM Water 1:1", peak 599, at 953.298 , 0.957 sec , sec (Spec # 53675)

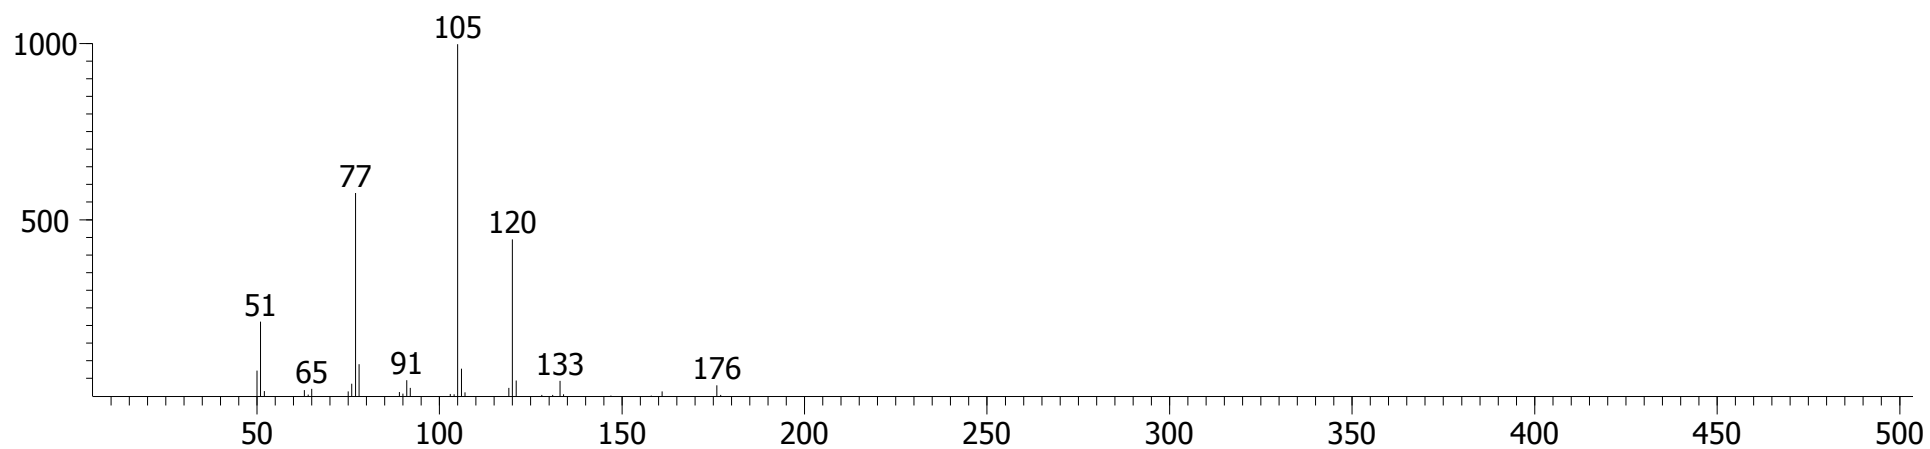

Library Hit - similarity 970, "1-Pentanone, 1-phenyl-"

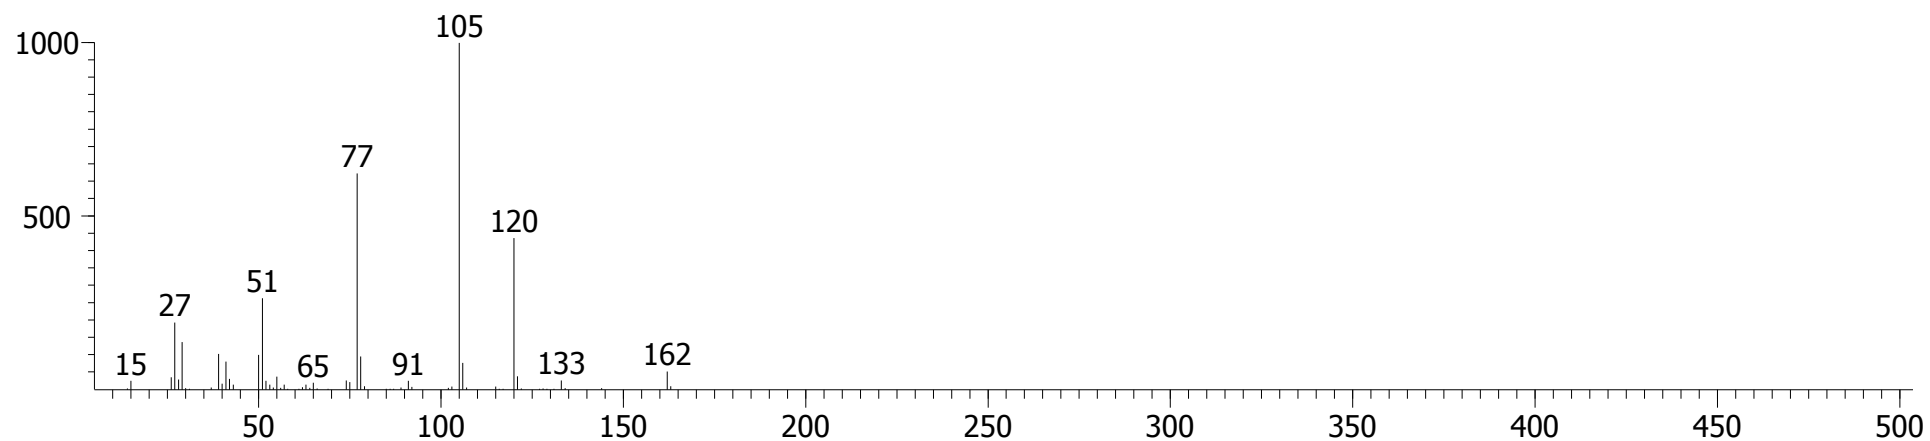

Sample 1, Fraction 3 (Water)

1-Propanone, 1-(2,4-dimethylphenyl)-

CAS # = 35031-55-1  
1st Dimension R.T. = 960.294  
2nd Dimension R.T. = 1.056  
Quant Mass(es) = 162  
S/N = 67.710  
Area = 3623.1  
Height = 517.50

(2,4-Dimethylpropiophenone)

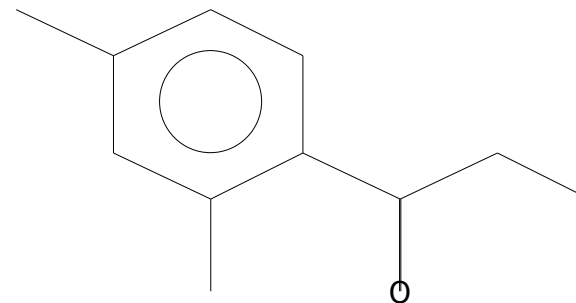

Peak True - sample "BM Water 1:1", peak 618, at 960.294 , 1.056 sec , sec (Spec # 54750)

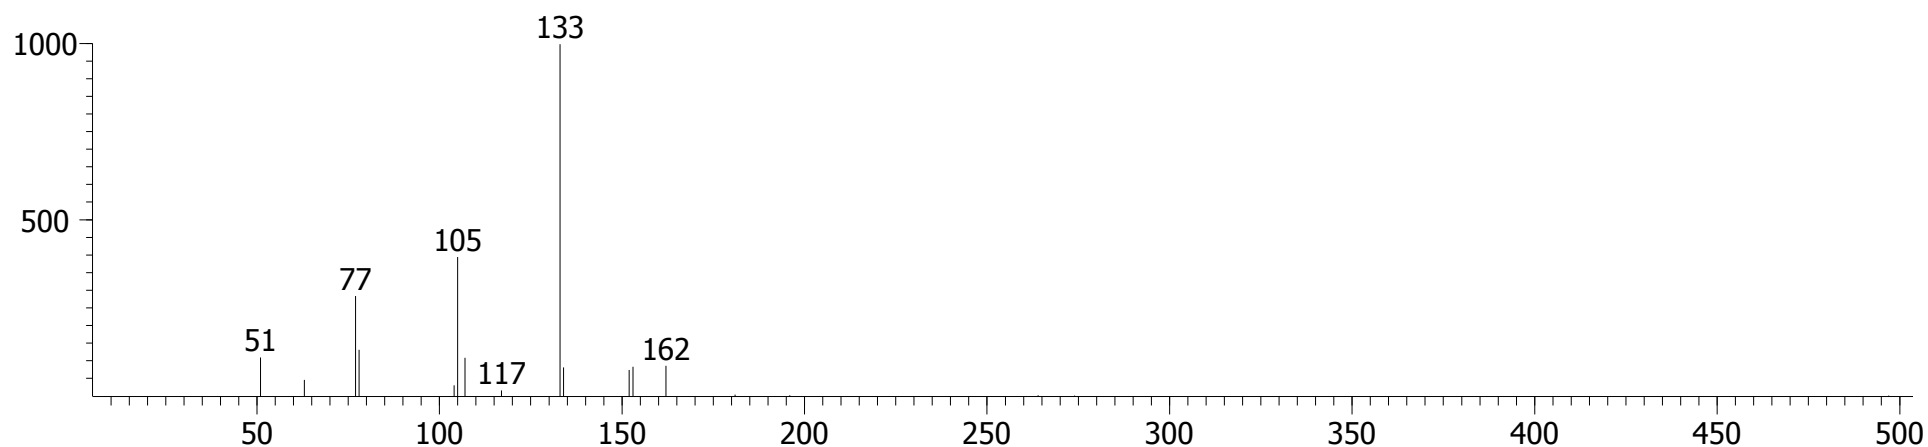

Library Hit - similarity 822, "1-Propanone, 1-(2,4-dimethylphenyl)-"

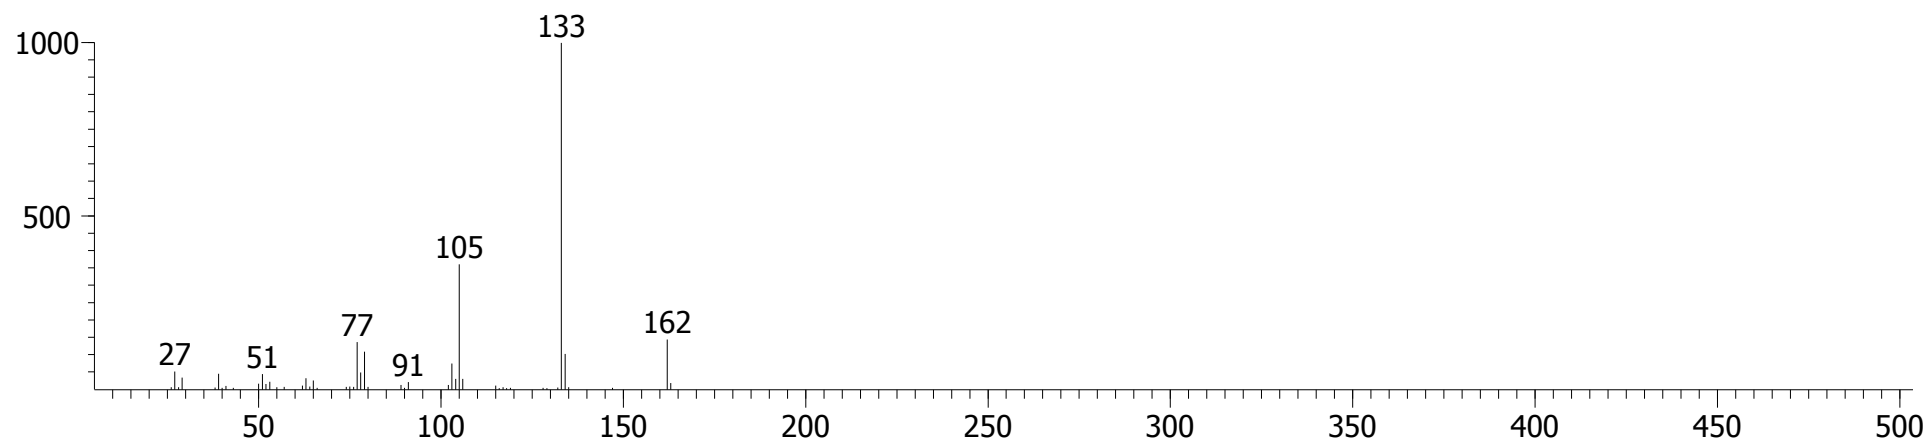

Sample 1, Fraction 3 (Water)

1H-Pyrrole, 1-(4-chlorophenyl)-

CAS # = 5044-38-2  
1st Dimension R.T. = 967.29  
2nd Dimension R.T. = 1.010  
Quant Mass(es) = 177  
S/N = 51.130  
Area = 10027  
Height = 1876.1

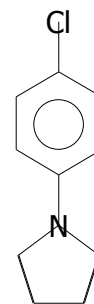

(1-(4-Chlorophenyl)pyrrole)

Peak True - sample "BM Water 1:1", peak 637, at 967.29 , 1.010 sec , sec (Spec # 55803)

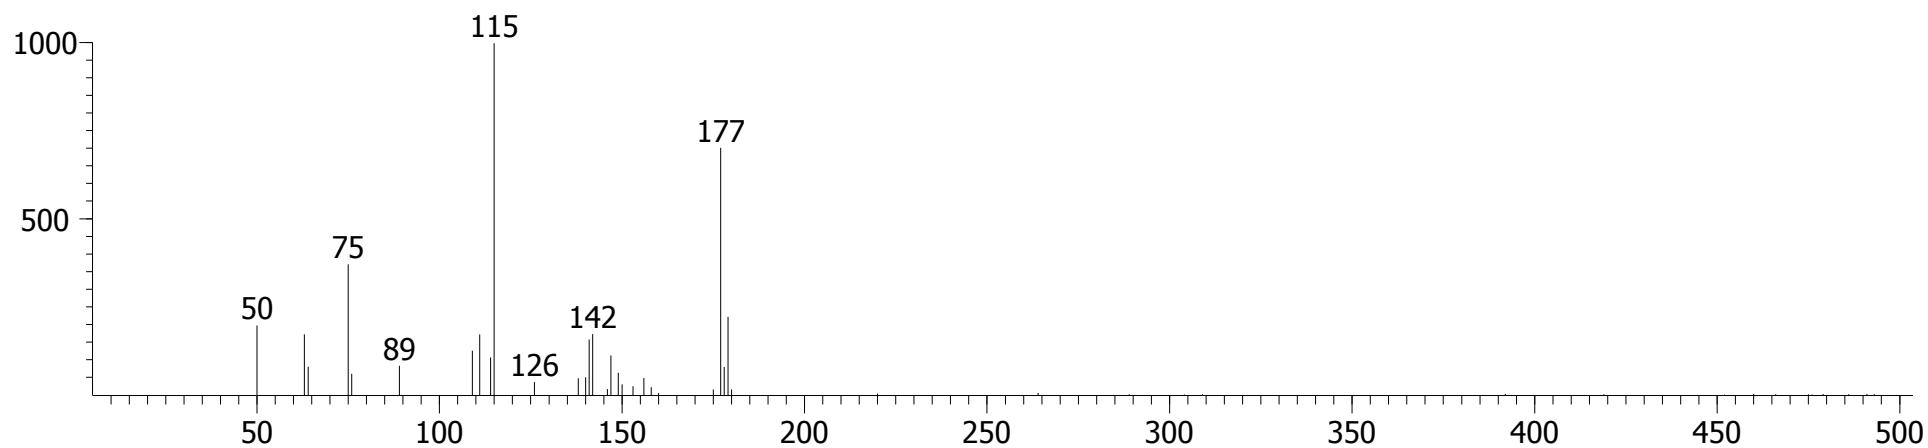

Library Hit - similarity 826, "1H-Pyrrole, 1-(4-chlorophenyl)-"

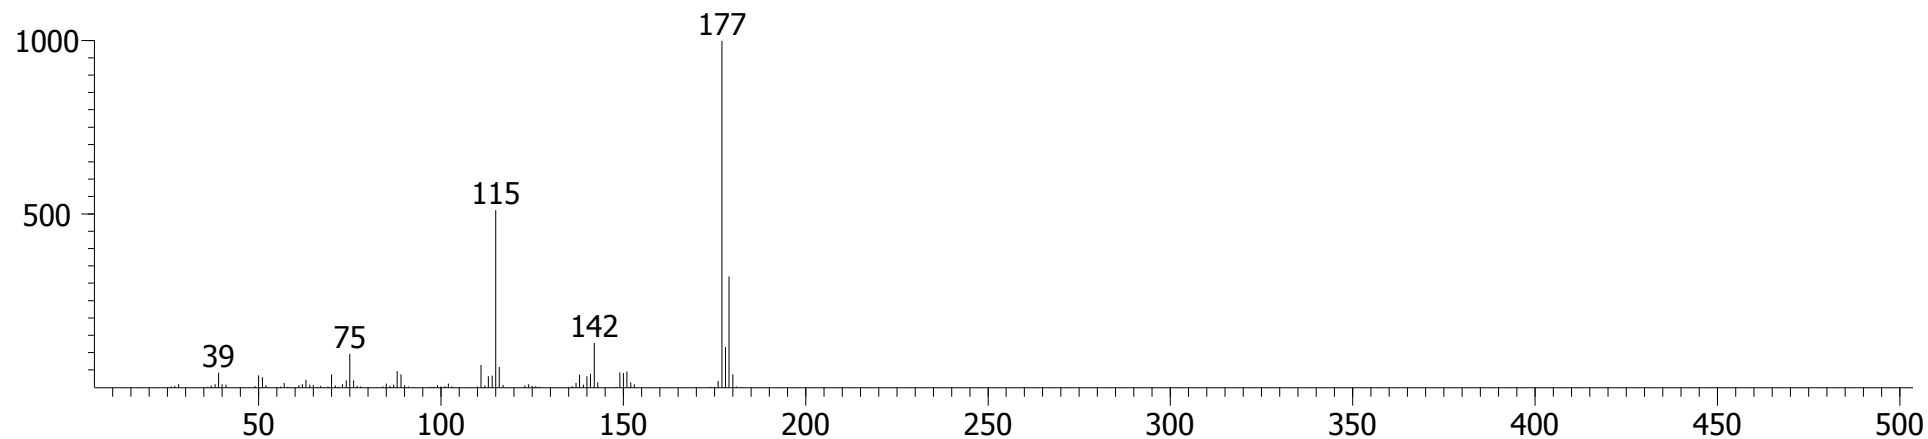

# Sample 1, Fraction 3 (Water)

## N-[2-Acetamidoethylthio]phthalimide

CAS # = 25158-14-9  
1st Dimension R.T. = 967.29  
2nd Dimension R.T. = 1.122  
Quant Mass(es) = 147  
S/N = 168.50  
Area = 39832  
Height = 7728.9

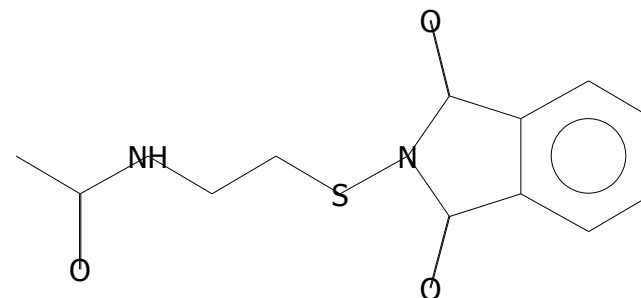

Peak True - sample "BM Water 1:1", peak 638, at 967.29 , 1.122 sec , sec (Spec # 55820)

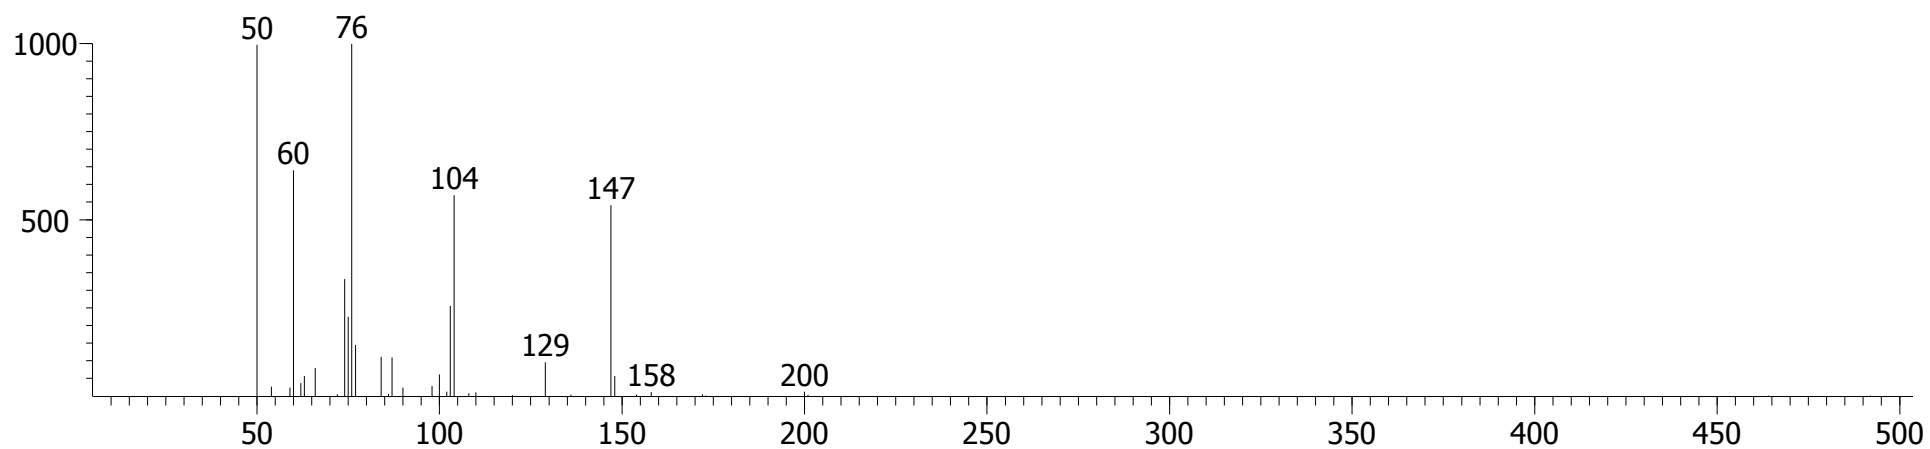

Library Hit - similarity 817, "N-[2-Acetamidoethylthio]phthalimide"

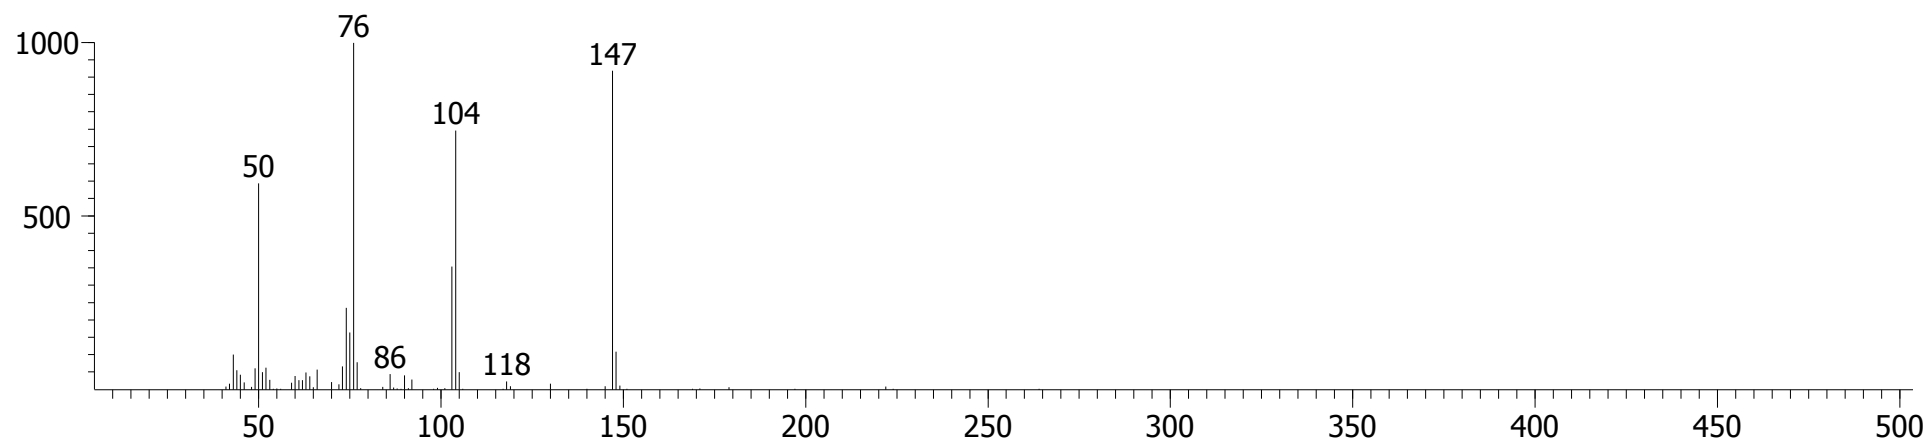

Sample 1, Fraction 3 (Water)

Phenol, 2,4-bis(1,1-dimethylethyl)-

CAS # = 96-76-4  
1st Dimension R.T. = 984.78  
2nd Dimension R.T. = 0.937  
Quant Mass(es) = 206  
S/N = 2376.7  
Area = 152168  
Height = 29375



(2,4-Di-tert-butylphenol)

Peak True - sample "BM Water 1:1", peak 671, at 984.78 , 0.937 sec , sec (Spec # 58442)

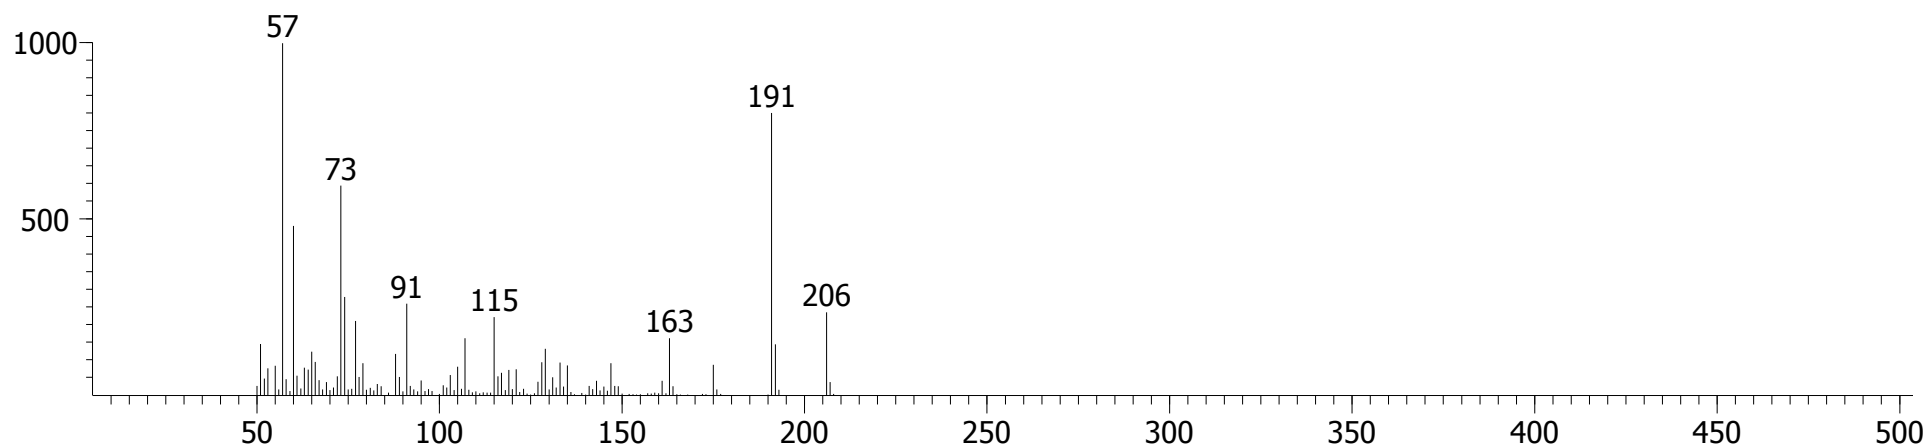

Library Hit - similarity 823, "Phenol, 2,4-bis(1,1-dimethylethyl)-"

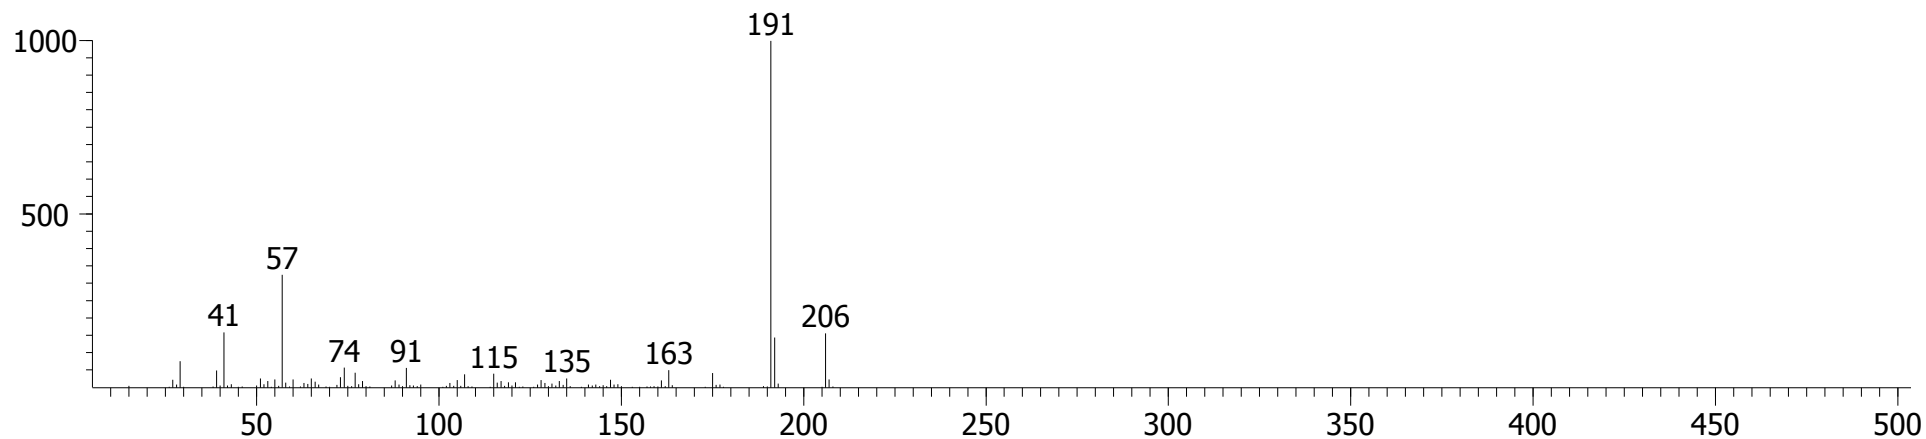



Sample 1, Fraction 3 (Water)

Benzoic acid, 4-ethoxy-, ethyl ester

CAS # = 23676-09-7  
1st Dimension R.T. = 998.772  
2nd Dimension R.T. = 0.977  
Quant Mass(es) = 194  
S/N = 5541.5  
Area = 187516  
Height = 31424

(Ethyl 4-ethoxybenzoate)

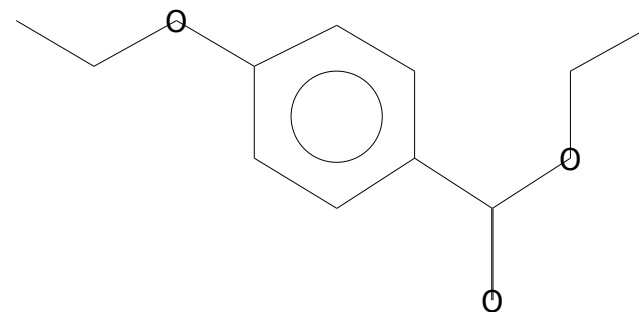

Peak True - sample "BM Water 1:1", peak 707, at 998.772 , 0.977 sec , sec (Spec # 60568)

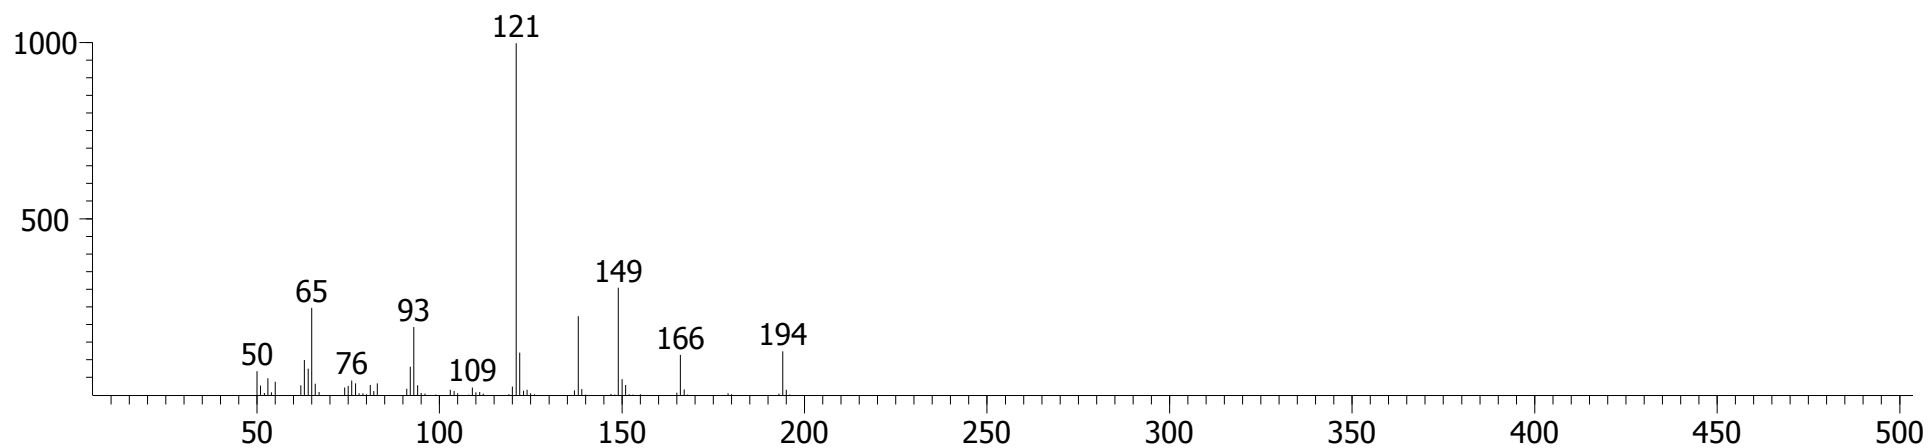

Library Hit - similarity 920, "Benzoic acid, 4-ethoxy-, ethyl ester"



Sample 1, Fraction 3 (Water)

Naphthalene, 1,4,5-trimethyl-

CAS # = 2131-41-1  
1st Dimension R.T. = 1012.76  
2nd Dimension R.T. = 0.983  
Quant Mass(es) = 170  
S/N = 111.33  
Area = 6146.1  
Height = 1087.6



(1,4,5-Trimethylnaphthalene)

Peak True - sample "BM Water 1:1", peak 734, at 1012.76 , 0.983 sec , sec (Spec # 62689)

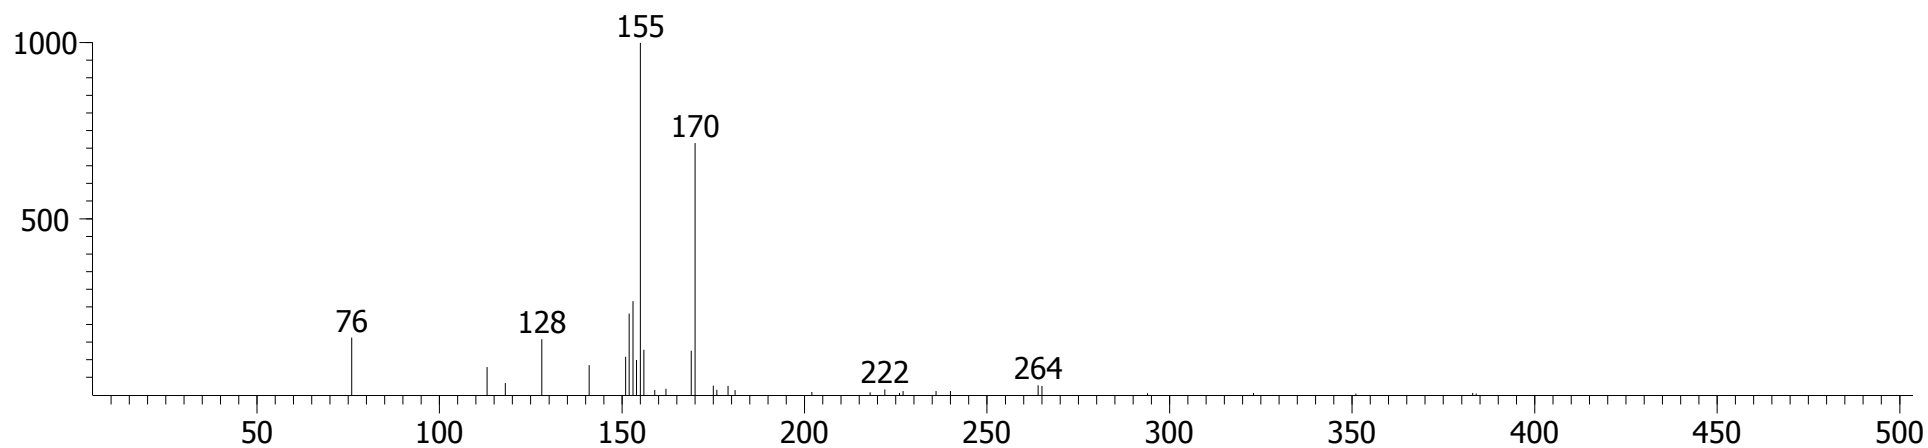

Library Hit - similarity 837, "Naphthalene, 1,4,5-trimethyl-"

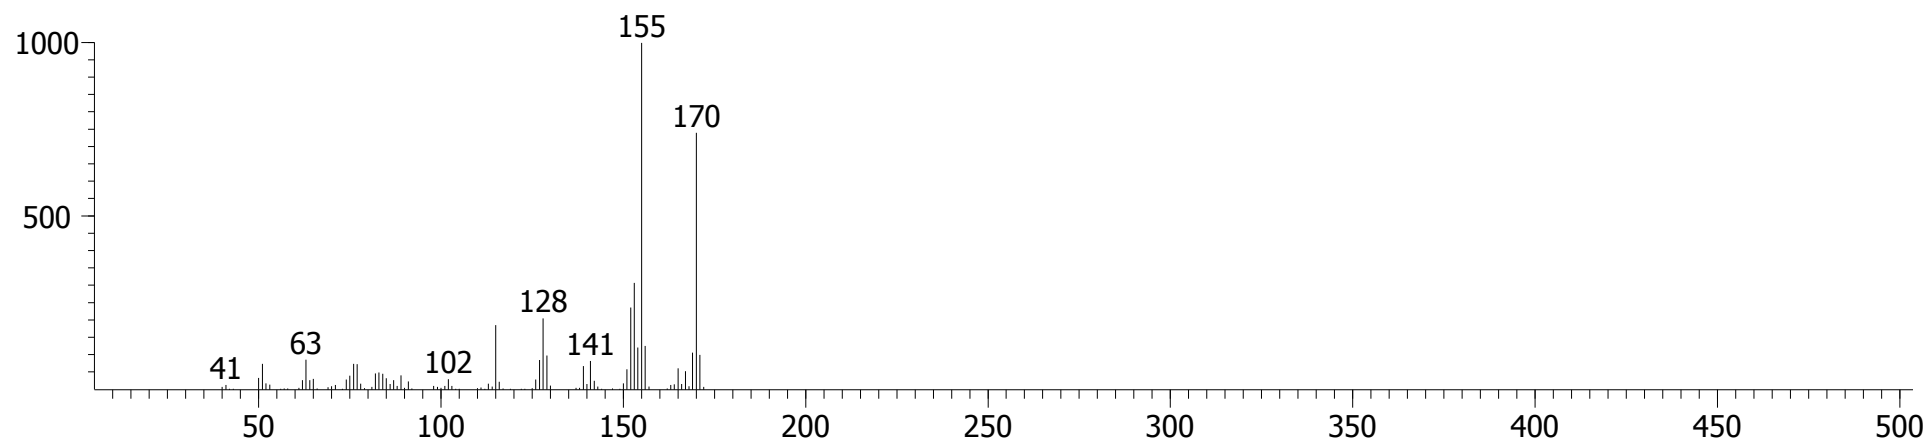

Sample 1, Fraction 3 (Water)

4-Chloroformanilide

CAS # = 2617-79-0  
1st Dimension R.T. = 1019.76  
2nd Dimension R.T. = 1.129  
Quant Mass(es) = 155  
S/N = 773.05  
Area = 87168  
Height = 15679

(N-(4-Chlorophenyl)formamide)

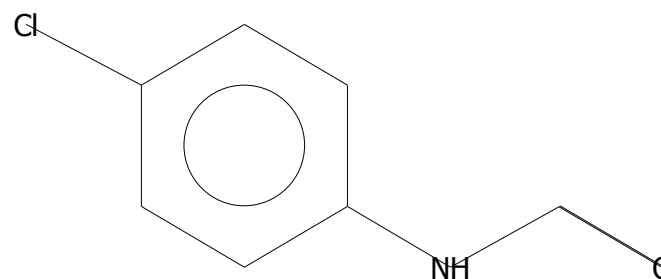

Peak True - sample "BM Water 1:1", peak 753, at 1019.76 , 1.129 sec , sec (Spec # 63771)

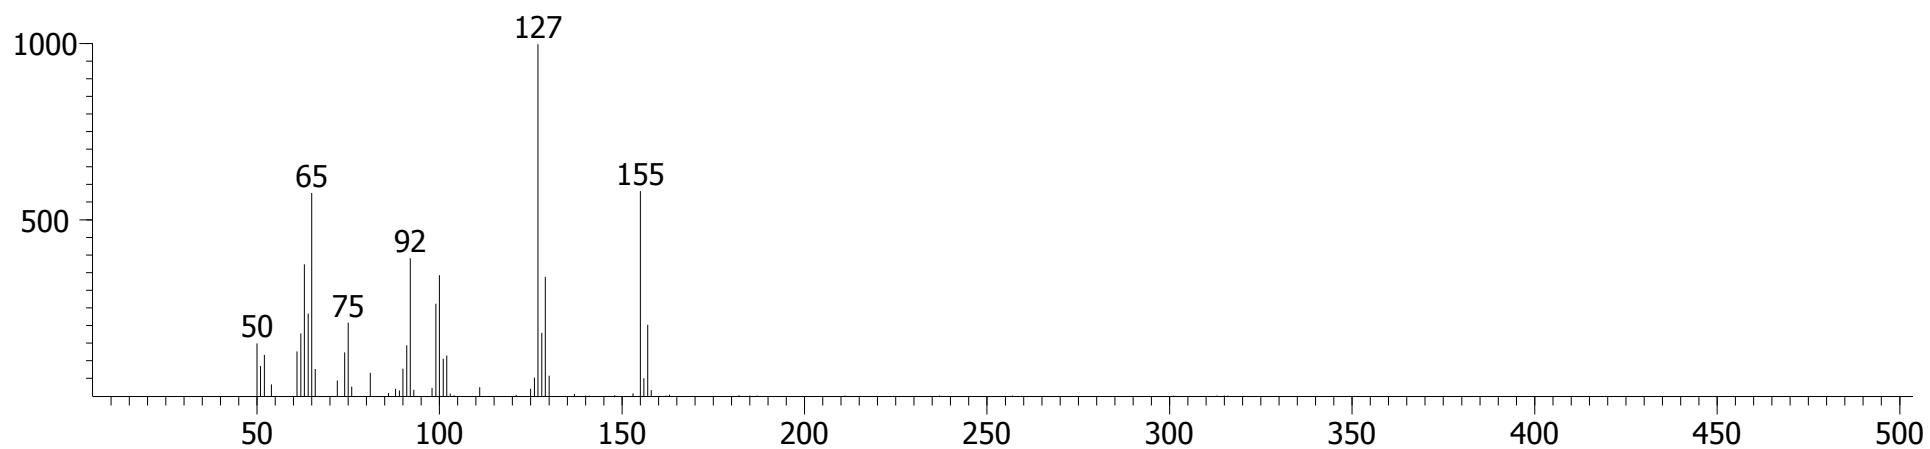

Library Hit - similarity 940, "4-Chloroformanilide"

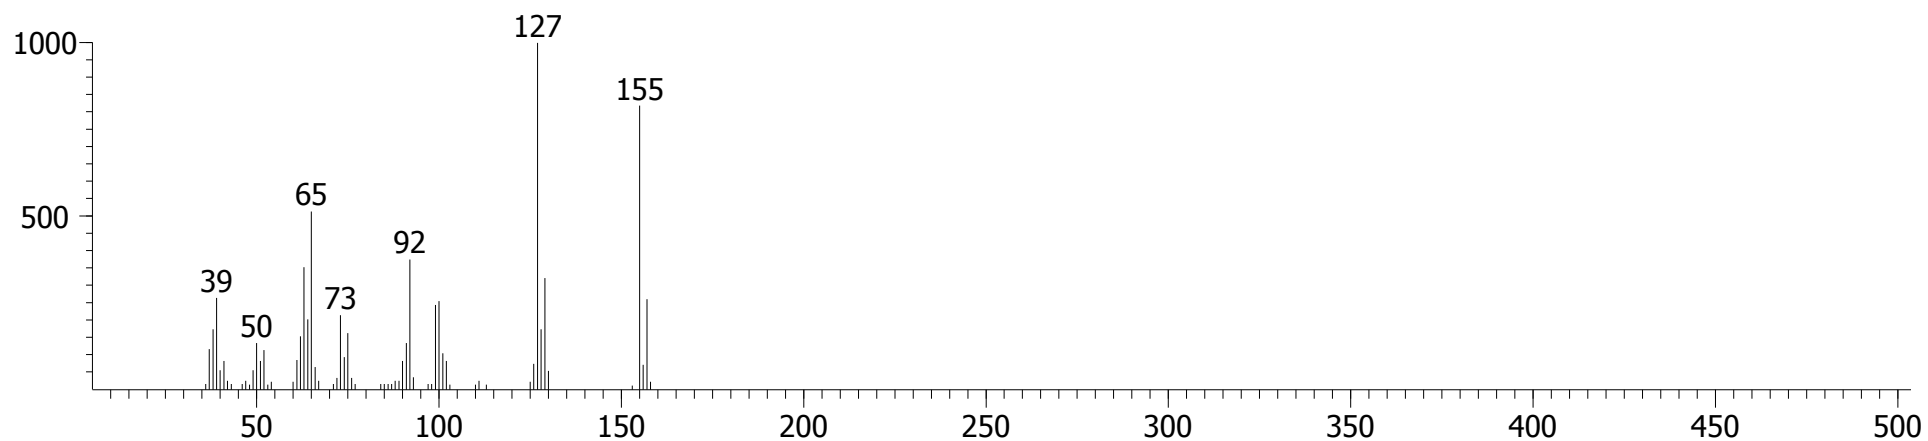

Sample 1, Fraction 3 (Water)

Benzene, 1-chloro-4-phenoxy-

(4-Chlorodiphenyl ether)

CAS # = 7005-72-3  
1st Dimension R.T. = 1058.24  
2nd Dimension R.T. = 1.016  
Quant Mass(es) = 204  
S/N = 4880.5  
Area = 202642  
Height = 37246

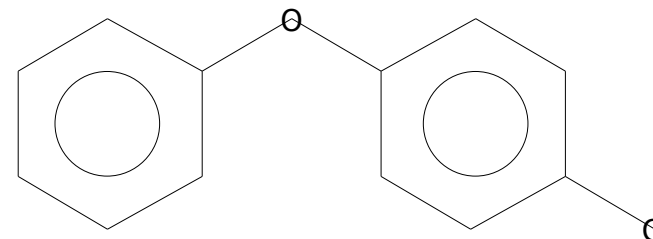

Peak True - sample "BM Water 1:1", peak 839, at 1058.24 , 1.016 sec , sec (Spec # 69584)

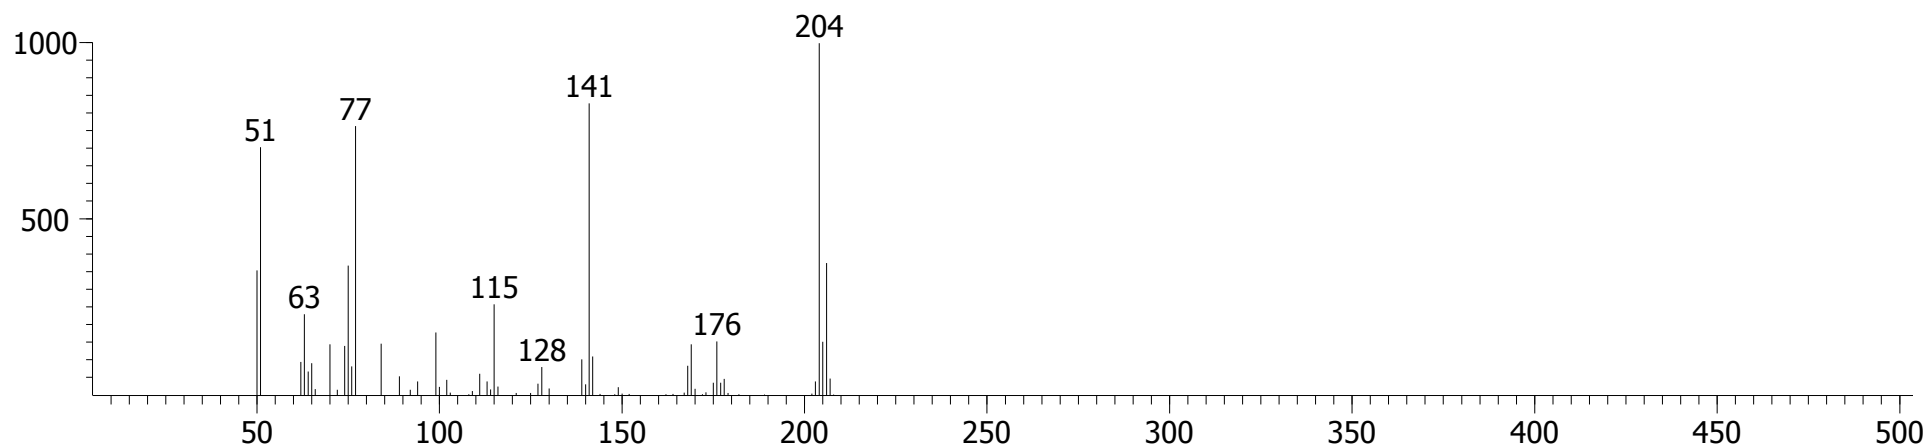

Library Hit - similarity 853, "Benzene, 1-chloro-4-phenoxy-"

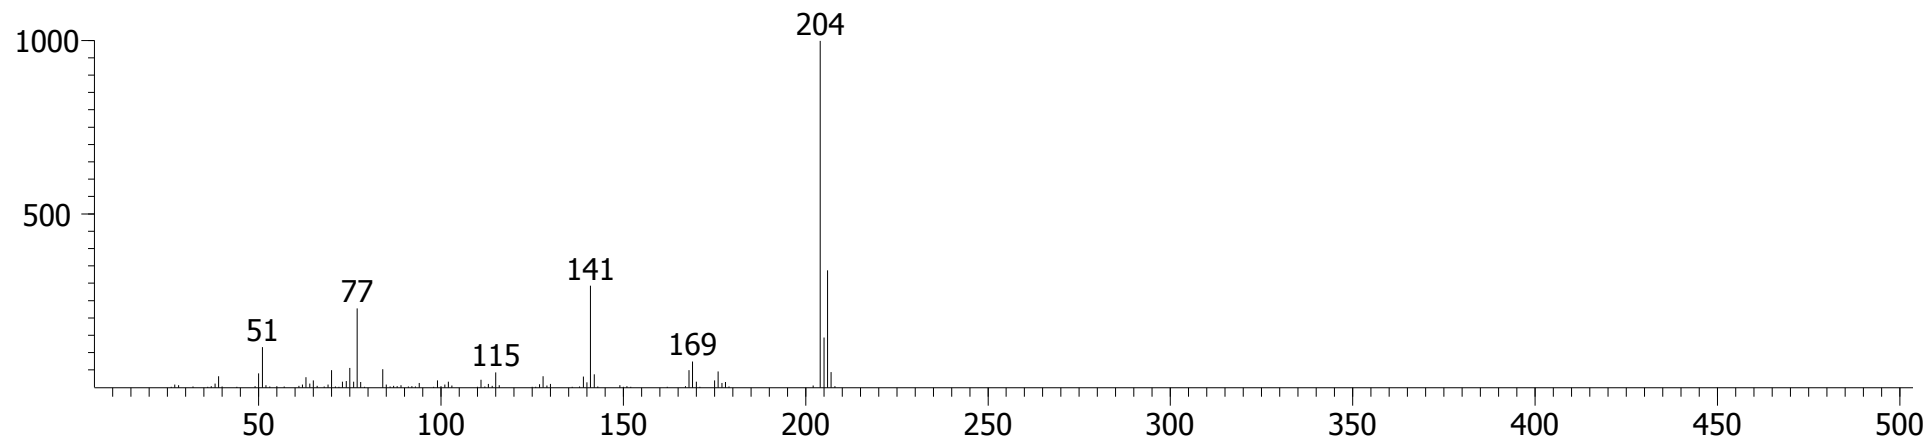

Sample 1, Fraction 3 (Water)

Formamide, (2-acetylphenyl)-

CAS # = 0-00-0  
1st Dimension R.T. = 1065.23  
2nd Dimension R.T. = 1.142  
Quant Mass(es) = 163  
S/N = 80.893  
Area = 5819.1  
Height = 1078.0

(N-(2-acetylphenyl)formamide)

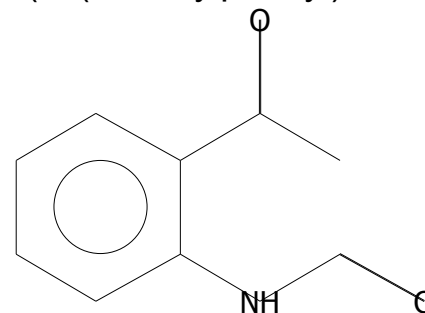

Peak True - sample "BM Water 1:1", peak 862, at 1065.23 , 1.142 sec , sec (Spec # 70663)

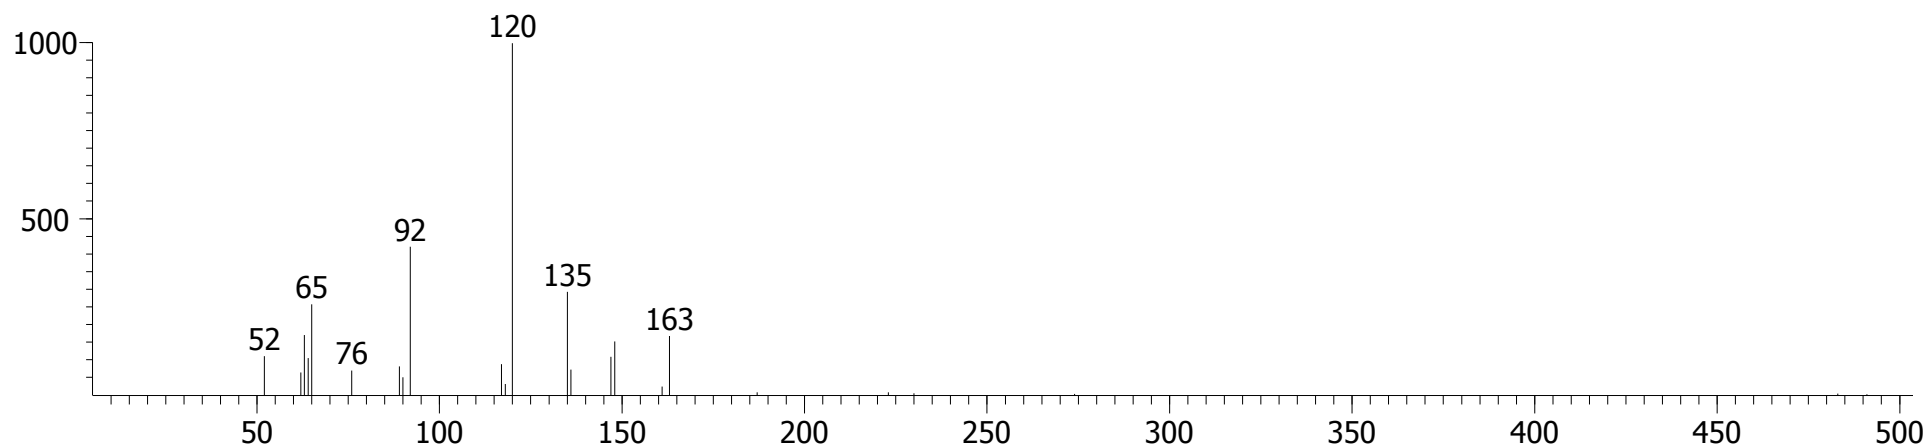

Library Hit - similarity 697, "Formamide, (2-acetylphenyl)-"

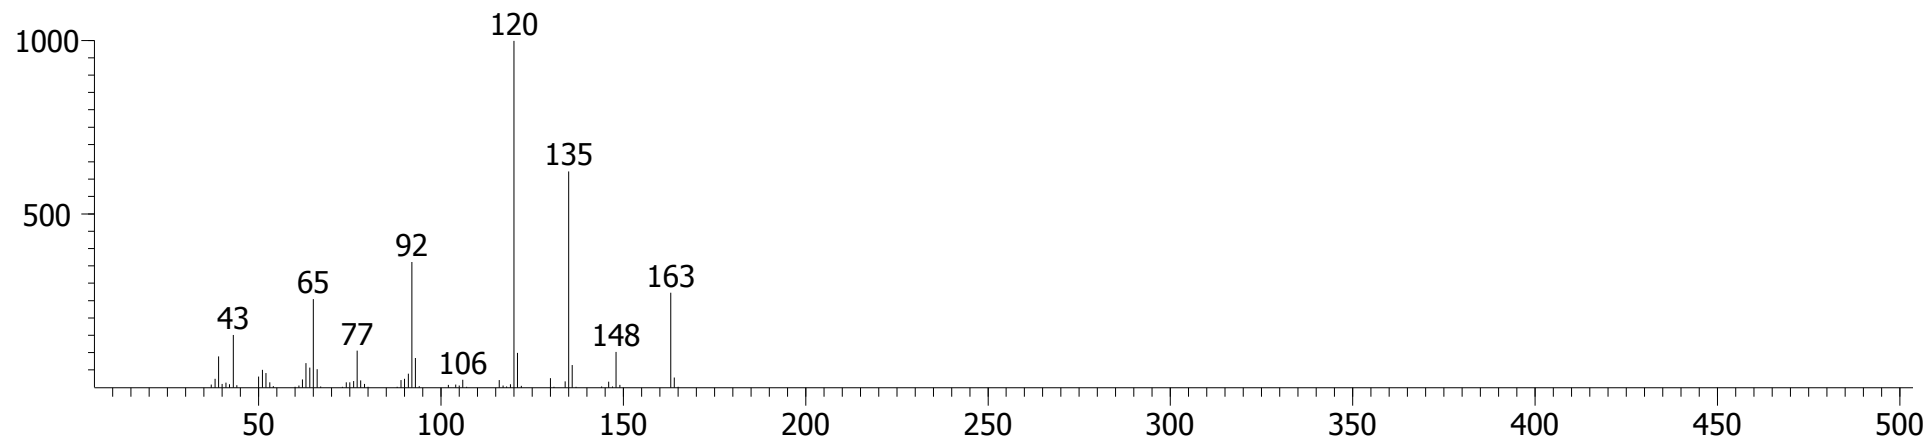

# Sample 1, Fraction 3 (Water)

## Benzophenone

CAS # = 119-61-9  
1st Dimension R.T. = 1082.72  
2nd Dimension R.T. = 1.076  
Quant Mass(es) = 182  
S/N = 1084.5  
Area = 112960  
Height = 18841

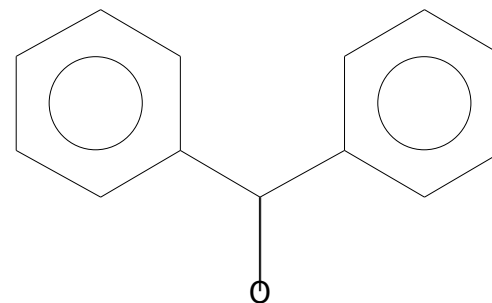

Peak True - sample "BM Water 1:1", peak 909, at 1082.72 , 1.076 sec , sec (Spec # 73303)

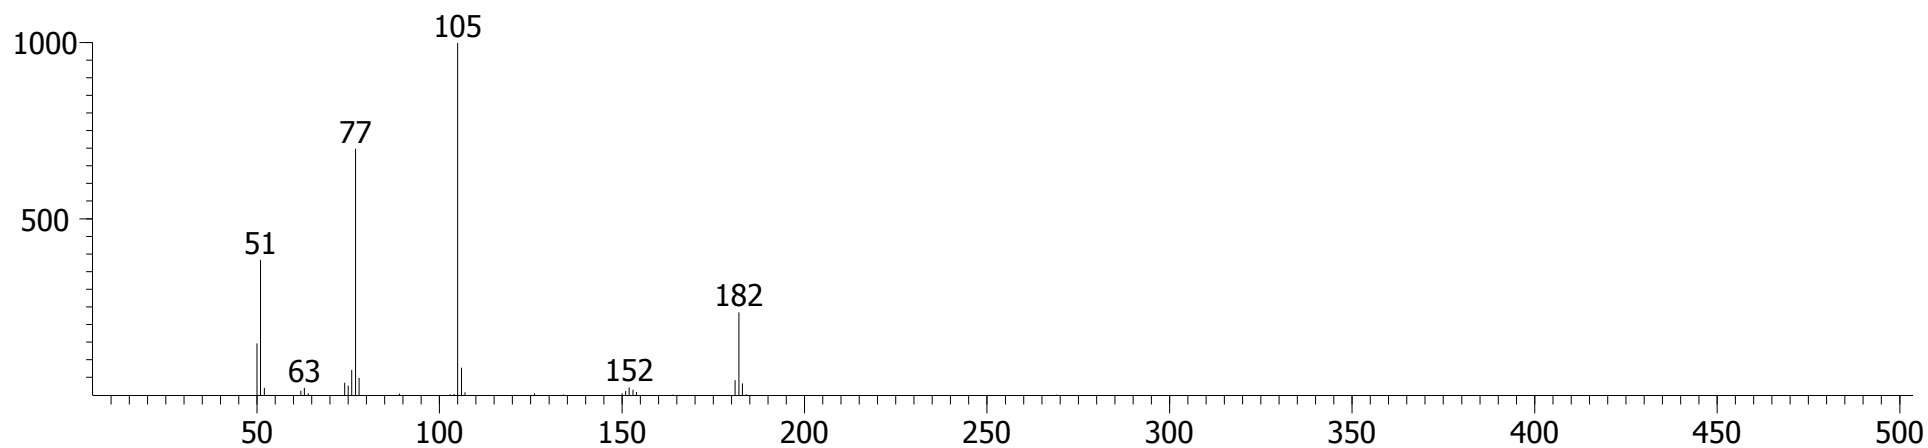

Library Hit - similarity 914, "Benzophenone"

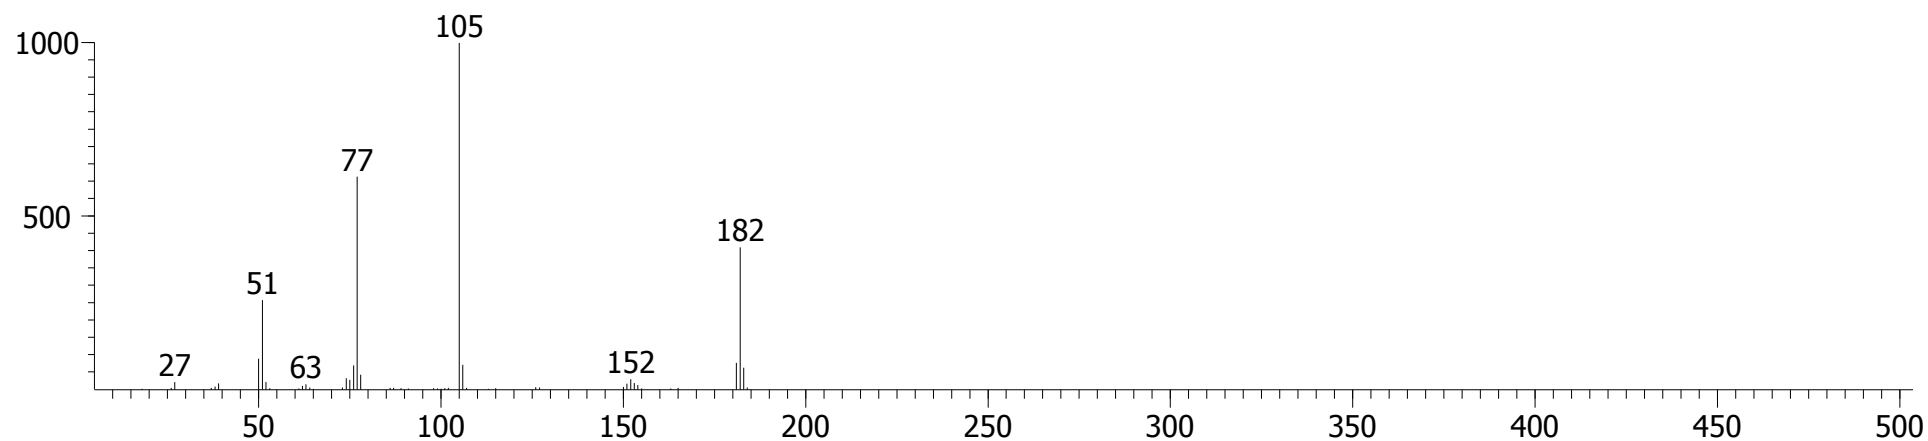

Sample 1, Fraction 3 (Water)

1H-Indole-2,3-dione

CAS # = 91-56-5  
1st Dimension R.T. = 1138.69  
2nd Dimension R.T. = 1.241  
Quant Mass(es) = 147  
S/N = 271.24  
Area = 124212  
Height = 13947

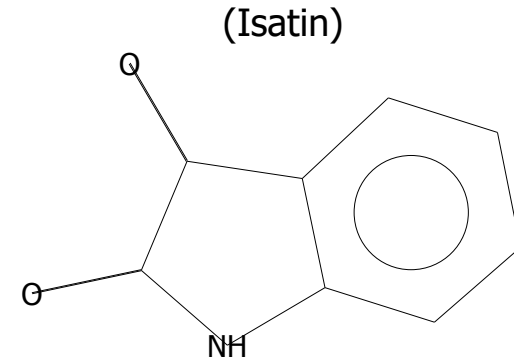

Peak True - sample "BM Water 1:1", peak 1060, at 1138.69 , 1.241 sec , sec (Spec # 81808)

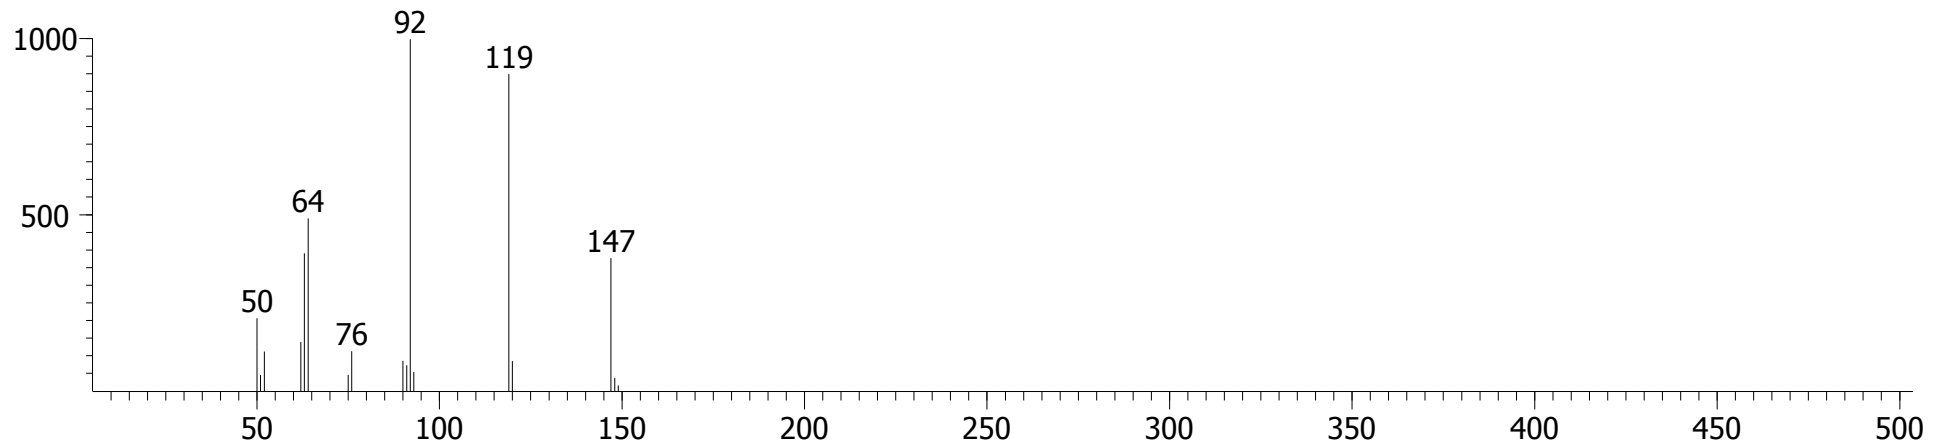

Library Hit - similarity 891, "1H-Indole-2,3-dione"

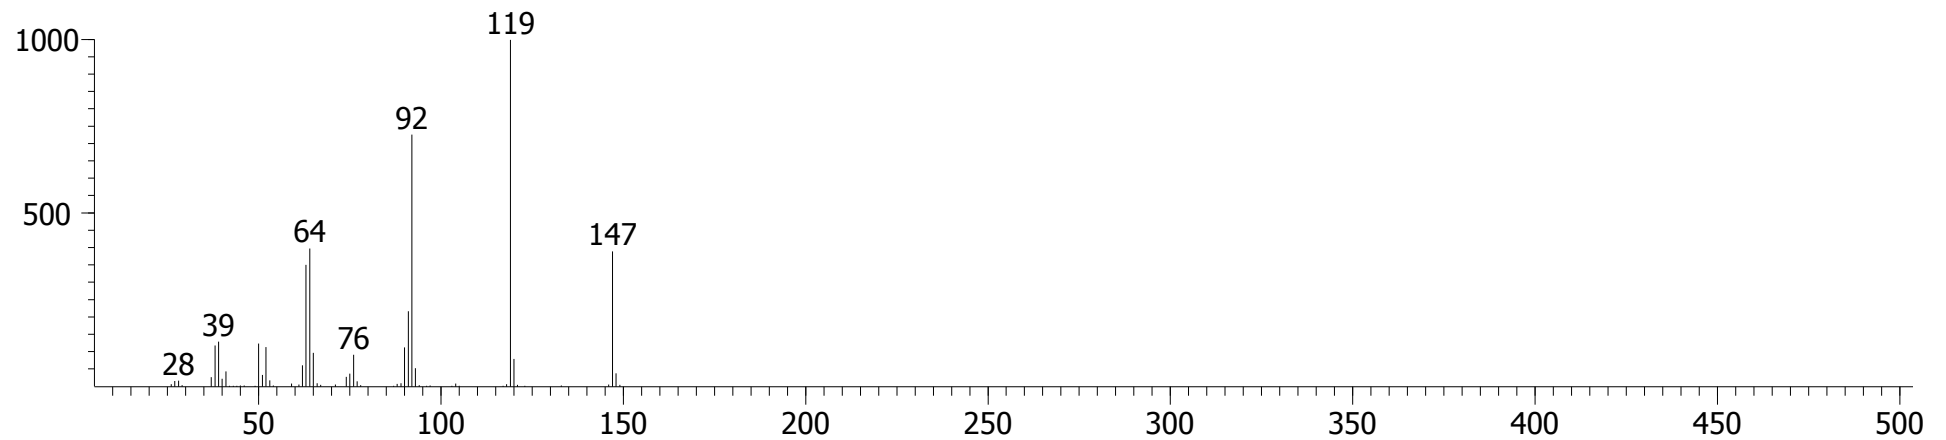

# Sample 1, Fraction 3 (Water)

## 3,5-di-tert-Butyl-4-hydroxybenzaldehyde

CAS # = 1620-98-0  
1st Dimension R.T. = 1163.18  
2nd Dimension R.T. = 1.010  
Quant Mass(es) = 234  
S/N = 1415.7  
Area = 31023  
Height = 5433.2



Peak True - sample "BM Water 1:1", peak 1135, at 1163.18 , 1.010 sec , sec (Spec # 85483)

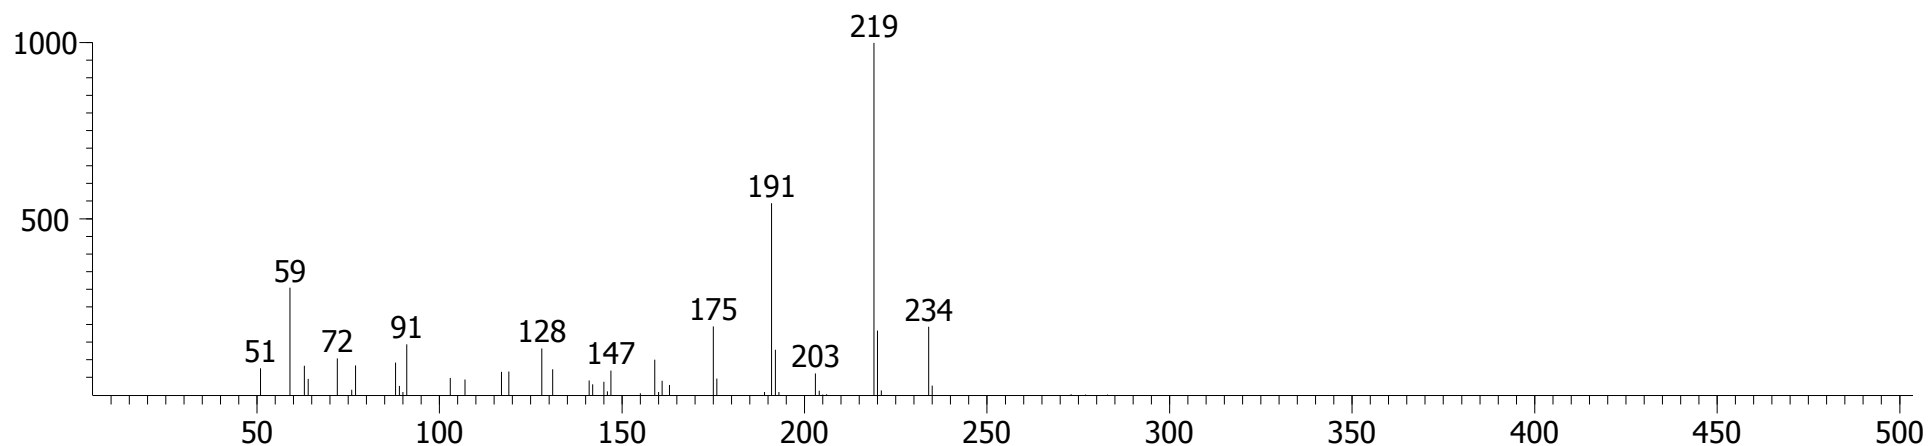

Library Hit - similarity 846, "3,5-di-tert-Butyl-4-hydroxybenzaldehyde"





# Sample 1, Fraction 3 (Water)

## Benzo[h]cinnoline

CAS # = 230-31-9  
1st Dimension R.T. = 1166.68  
2nd Dimension R.T. = 1.129  
Quant Mass(es) = 180  
S/N = 62.220  
Area = 5230.2  
Height = 797.14

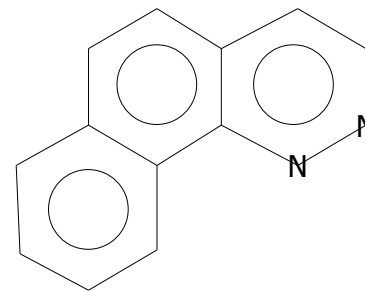

Peak True - sample "BM Water 1:1", peak 1151, at 1166.68 , 1.129 sec , sec (Spec # 86031)

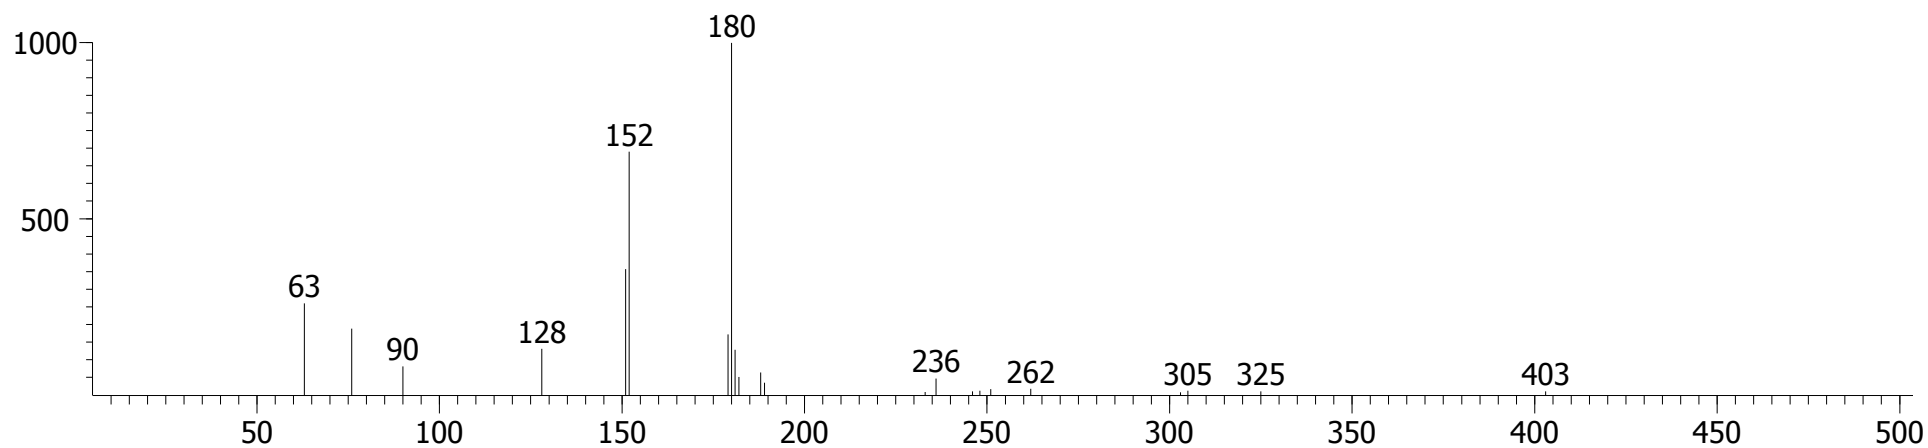

Library Hit - similarity 754, "Benzo[h]cinnoline"

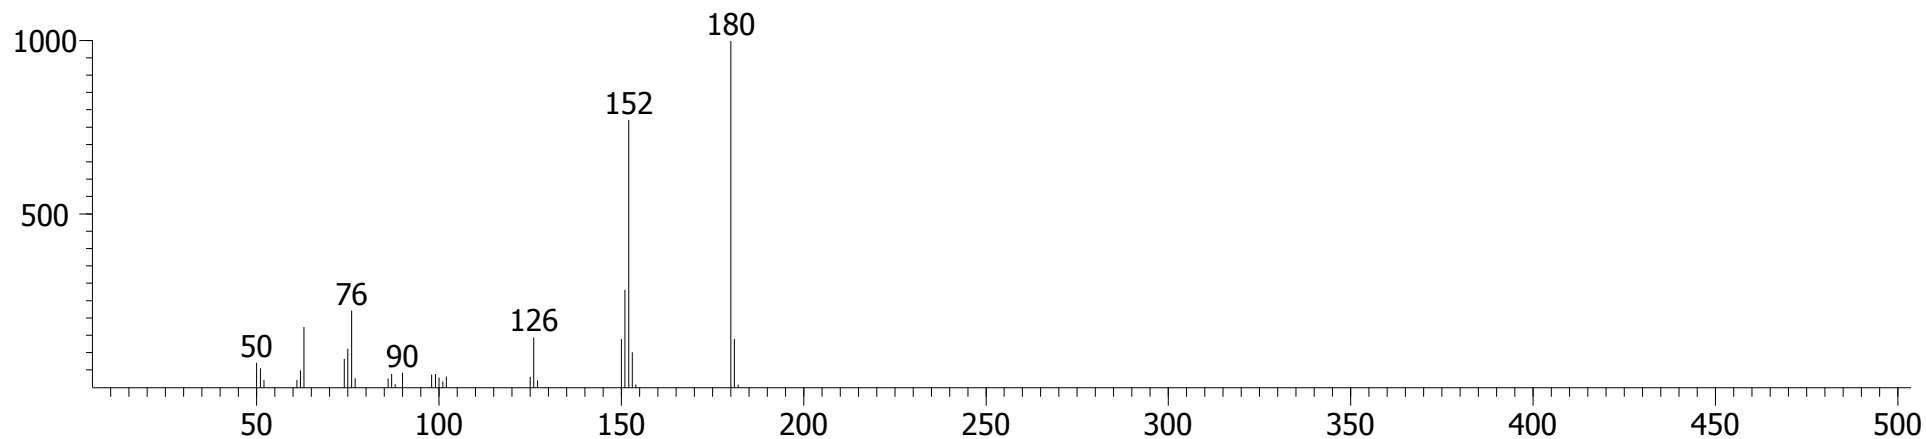

# Sample 1, Fraction 3 (Water)

## beta-HCH

CAS # = 319-84-6  
1st Dimension R.T. = 1173.67  
2nd Dimension R.T. = 1.109  
Quant Mass(es) = 219  
S/N = 156.55  
Area = 14813  
Height = 2236.8



Peak True - sample "BM Water 1:1", peak 1175, at 1173.67 , 1.109 sec , sec (Spec # 87088)

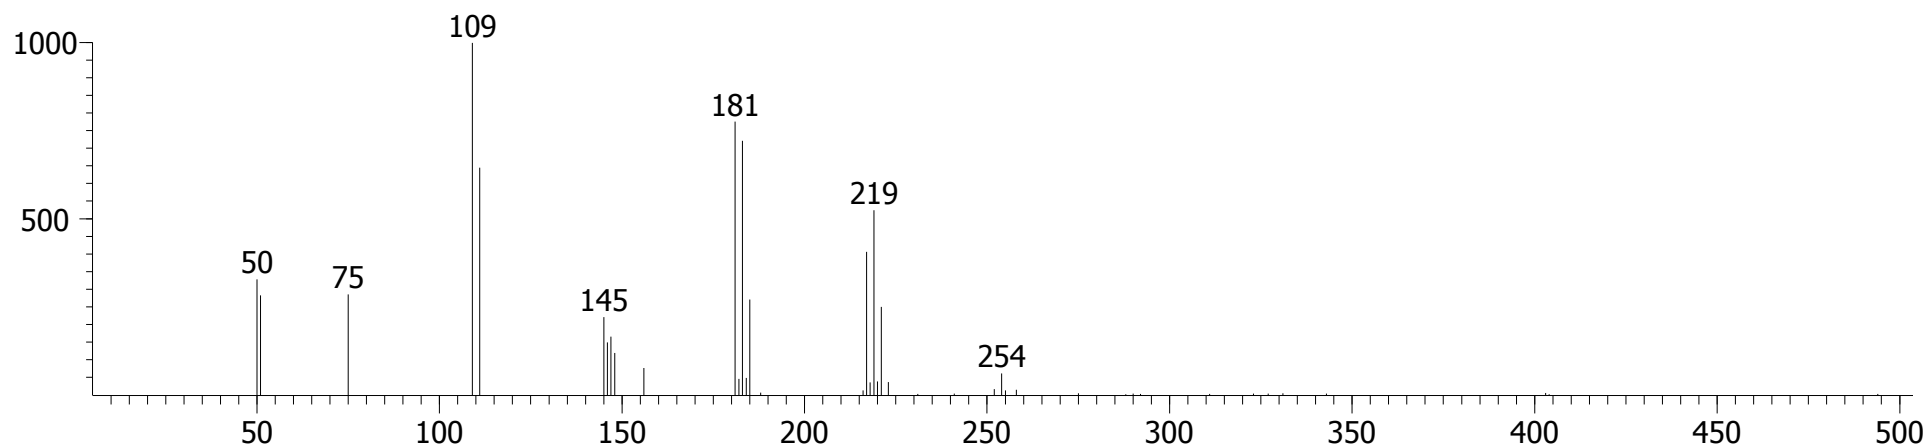

Library Hit - similarity 781, "à-Lindane"

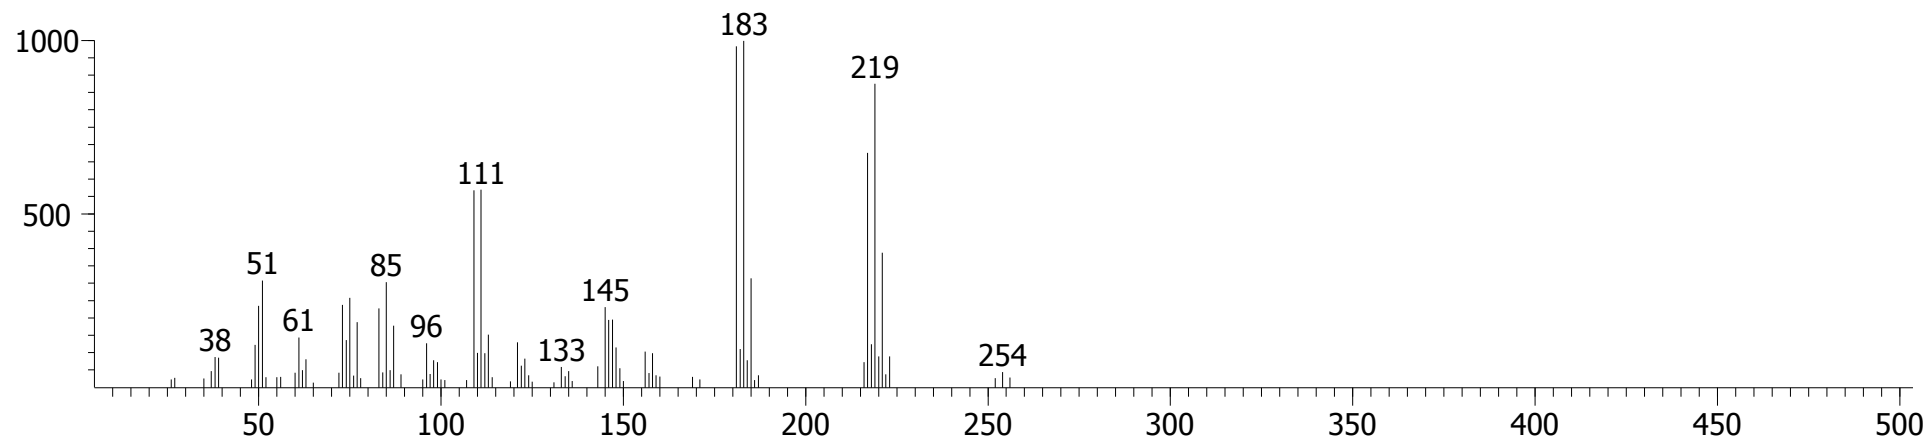

# Sample 1, Fraction 3 (Water)

## Benzenepropanoic acid, 3,5-bis(1,1-dimethylethyl)-4-hydroxy-,

CAS # = 6386-38-5  
1st Dimension R.T. = 1261.12  
2nd Dimension R.T. = 1.010  
Quant Mass(es) = 292  
S/N = 438.34  
Area = 10046  
Height = 1881.8



Peak True - sample "BM Water 1:1", peak 1458, at 1261.12 , 1.010 sec , sec (Spec # 100323)

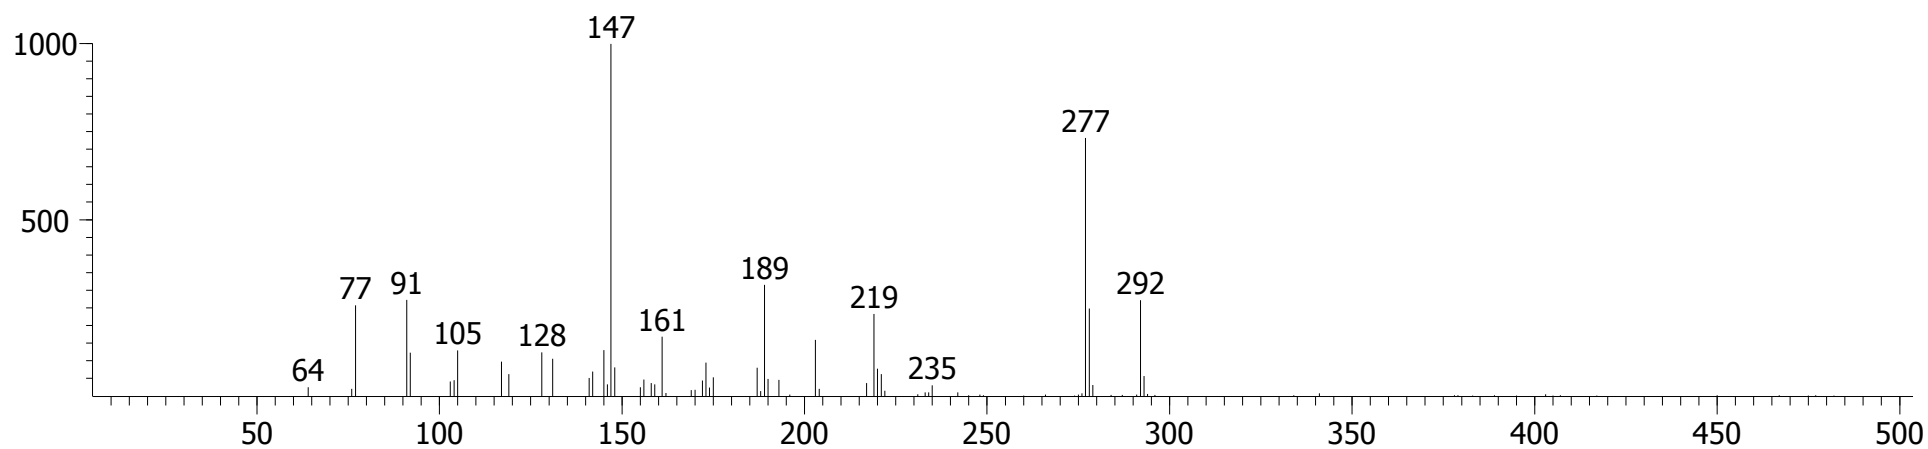

Library Hit - similarity 829, "Benzenepropanoic acid, 3,5-bis(1,1-dimethylethyl)-4-hydroxy-, methyl ester"

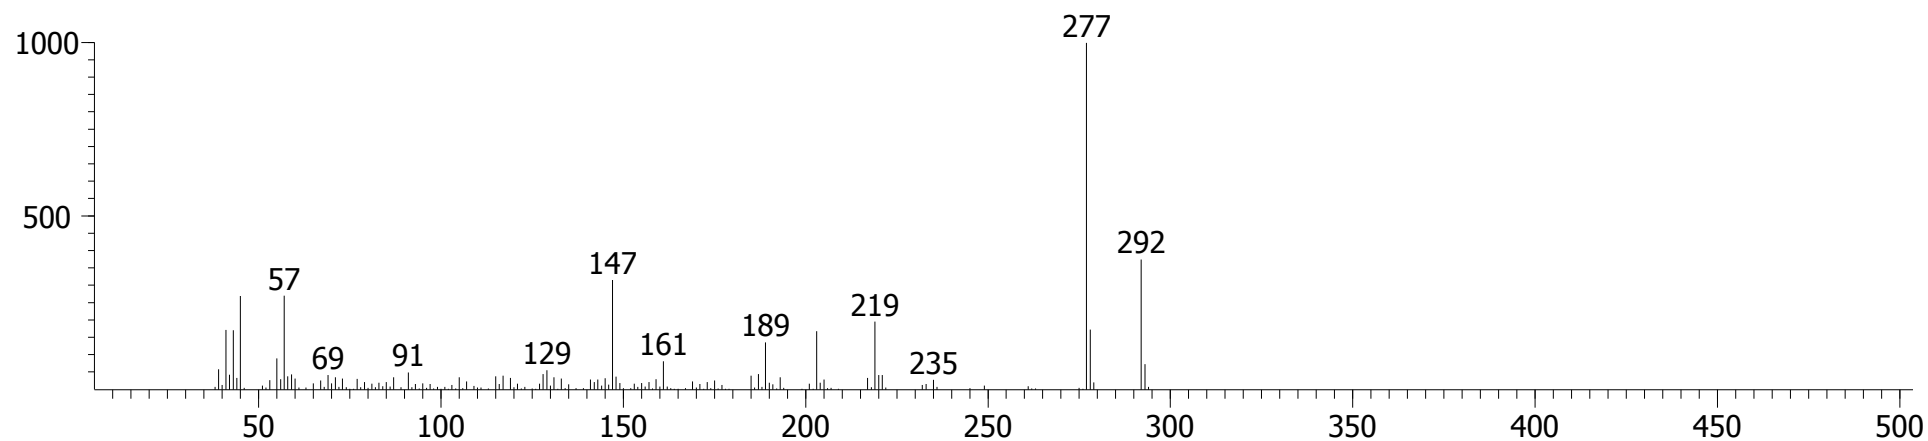

# Sample 1, Fraction 3 (Water)

## 4,4'-Dichlorodiphenylsulphide

CAS # = 5181-10-2

1st Dimension R.T. = 1296.1

2nd Dimension R.T. = 1.109

Quant Mass(es) = 254

S/N = 599.73

Area = 44711

Height = 6966.2



Peak True - sample "BM Water 1:1", peak 1595, at 1296.1 , 1.109 sec , sec (Spec # 105638)

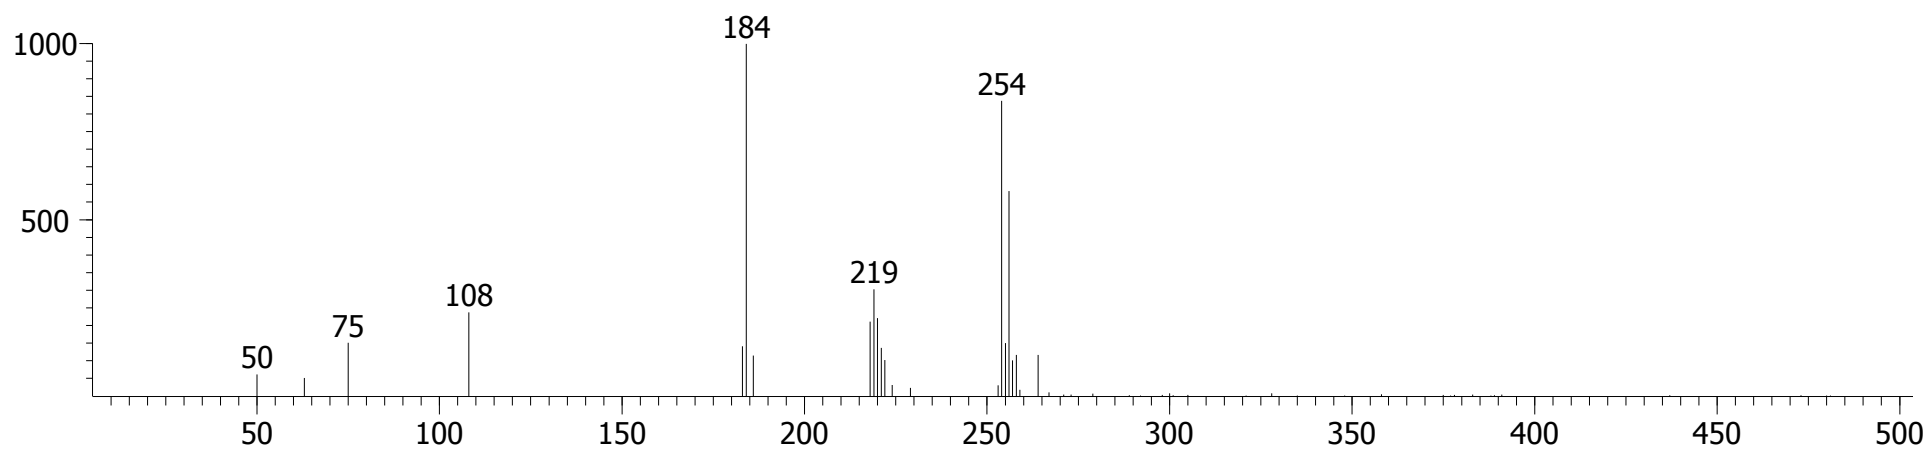

Library Hit - similarity 846, "4,4'-Dichlorodiphenylsulphide"

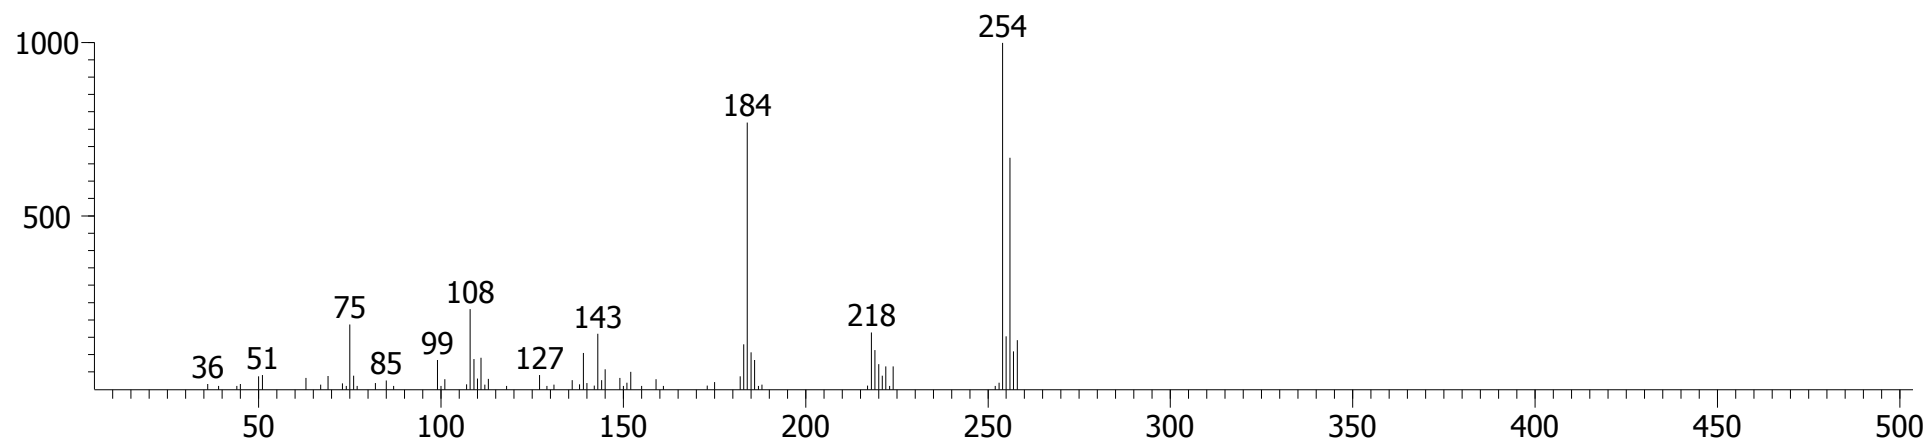

# Sample 1, Fraction 3 (Water)

## Benzyl butyl phthalate

CAS # = 85-68-7  
1st Dimension R.T. = 1484.99  
2nd Dimension R.T. = 1.228  
Quant Mass(es) = 206  
S/N = 62.291  
Area = 10900  
Height = 1285.9

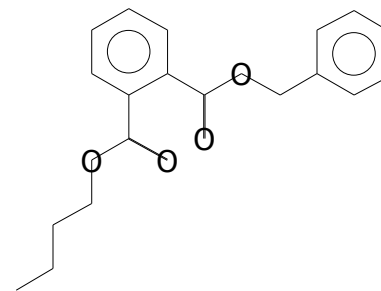

Peak True - sample "BM Water 1:1", peak 2445, at 1484.99 , 1.228 sec , sec (Spec # 134276)

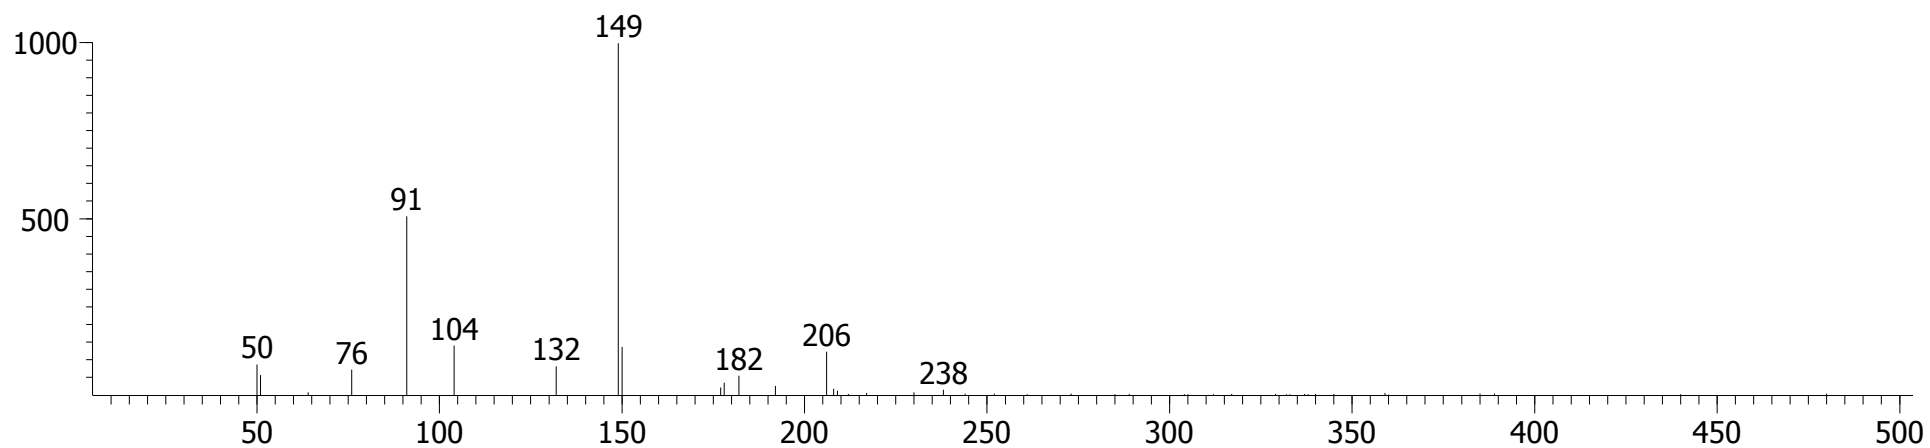

Library Hit - similarity 801, "Benzyl butyl phthalate"

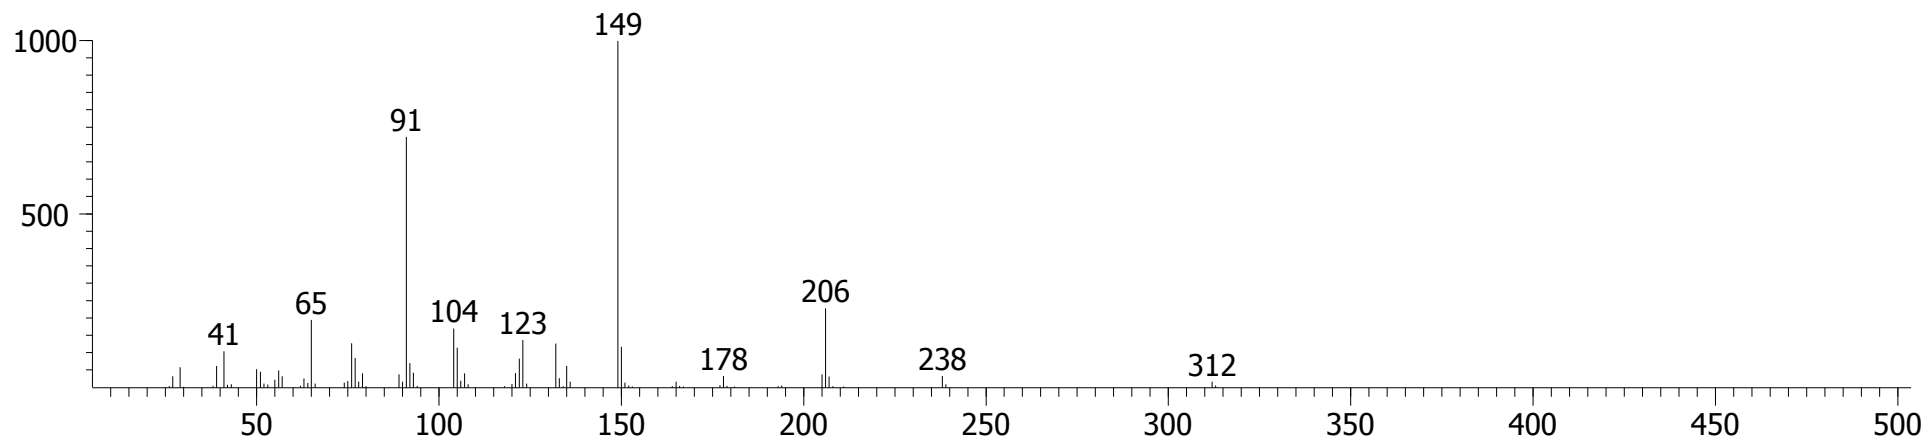

Sample 1, Fraction 3 (Water)

Pyrrolo[1,2-a]pyrazine-1,4-dione,  
hexahydro-3-(phenylmethyl)-

CAS # = 14705-60-3  
1st Dimension R.T. = 1516.48  
2nd Dimension R.T. = 1.432  
Quant Mass(es) = 244  
S/N = 61.010  
Area = 2959.4  
Height = 414.17

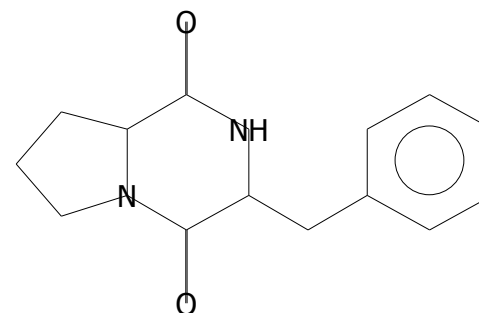

Peak True - sample "BM Water 1:1", peak 2565, at 1516.48 , 1.432 sec , sec (Spec # 139077)

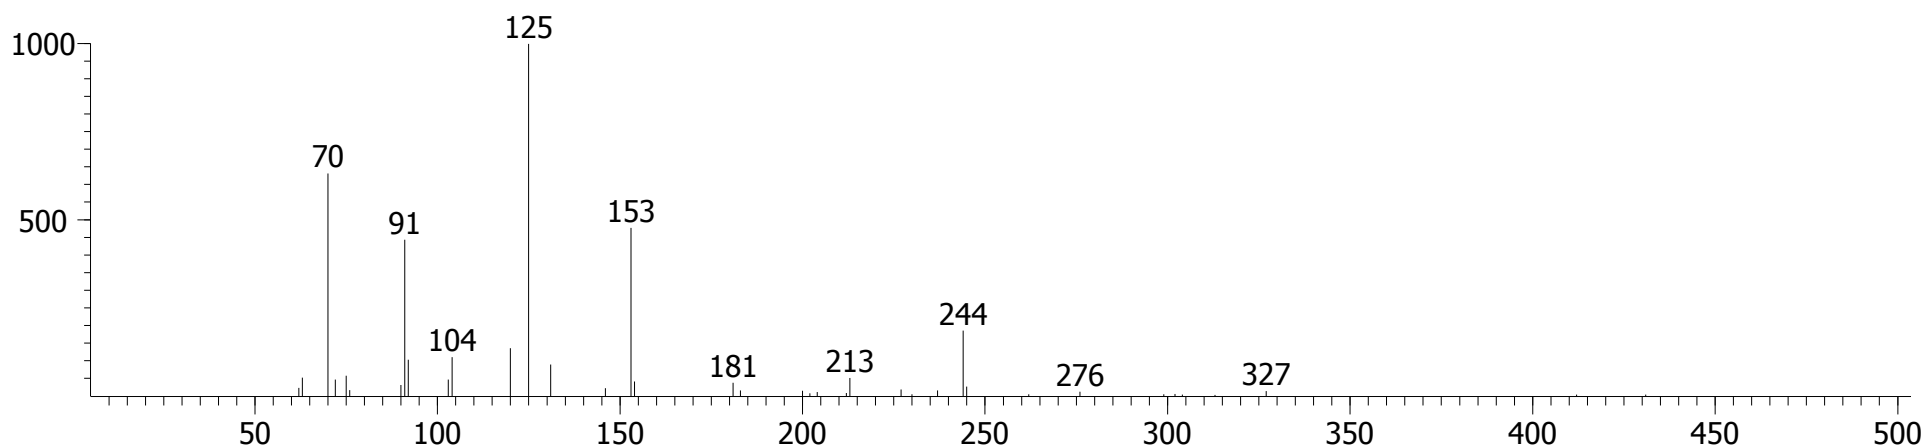

Library Hit - similarity 791, "Pyrrolo[1,2-a]pyrazine-1,4-dione, hexahydro-3-(phenylmethyl)-"

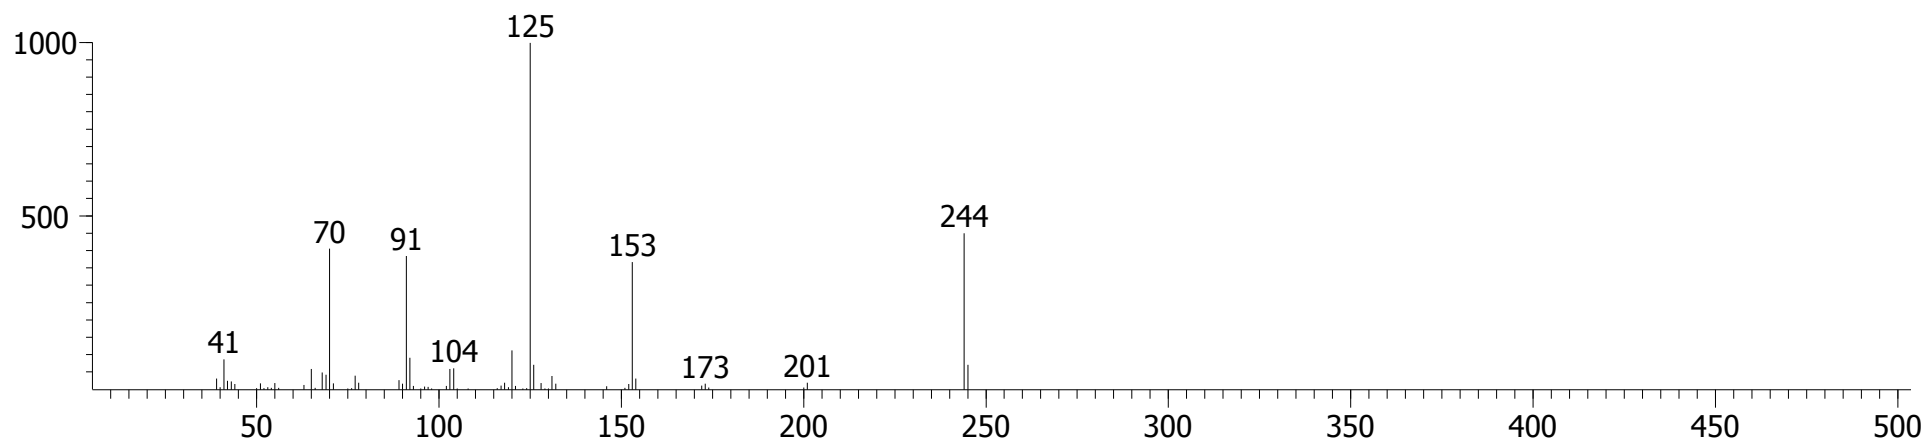

Sample 1, Fraction 3 (Water)

Phthalic acid, di(oct-3-yl) ester

CAS # = 0-00-0  
1st Dimension R.T. = 1561.95  
2nd Dimension R.T. = 1.162  
Quant Mass(es) = 167  
S/N = 2442.1  
Area = 489835  
Height = 50535

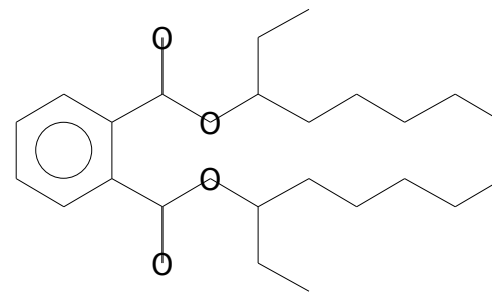

Peak True - sample "BM Water 1:1", peak 2740, at 1561.95 , 1.162 sec , sec (Spec # 145926)

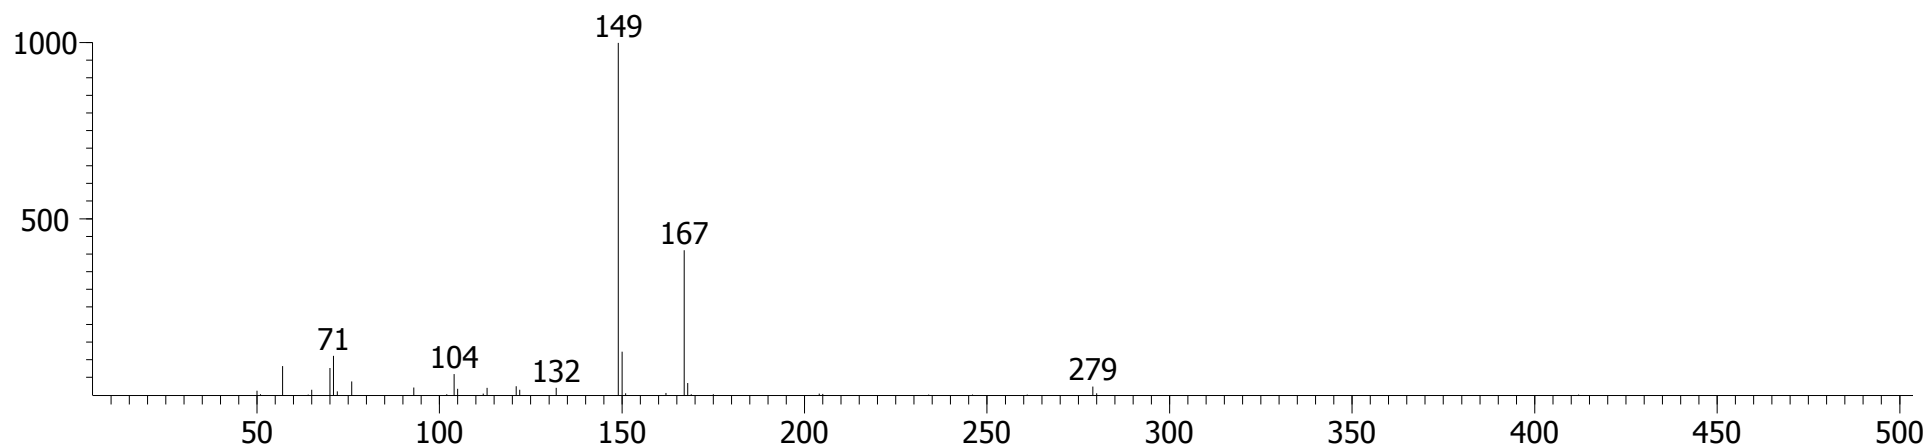

Library Hit - similarity 904, "Phthalic acid, di(oct-3-yl) ester"

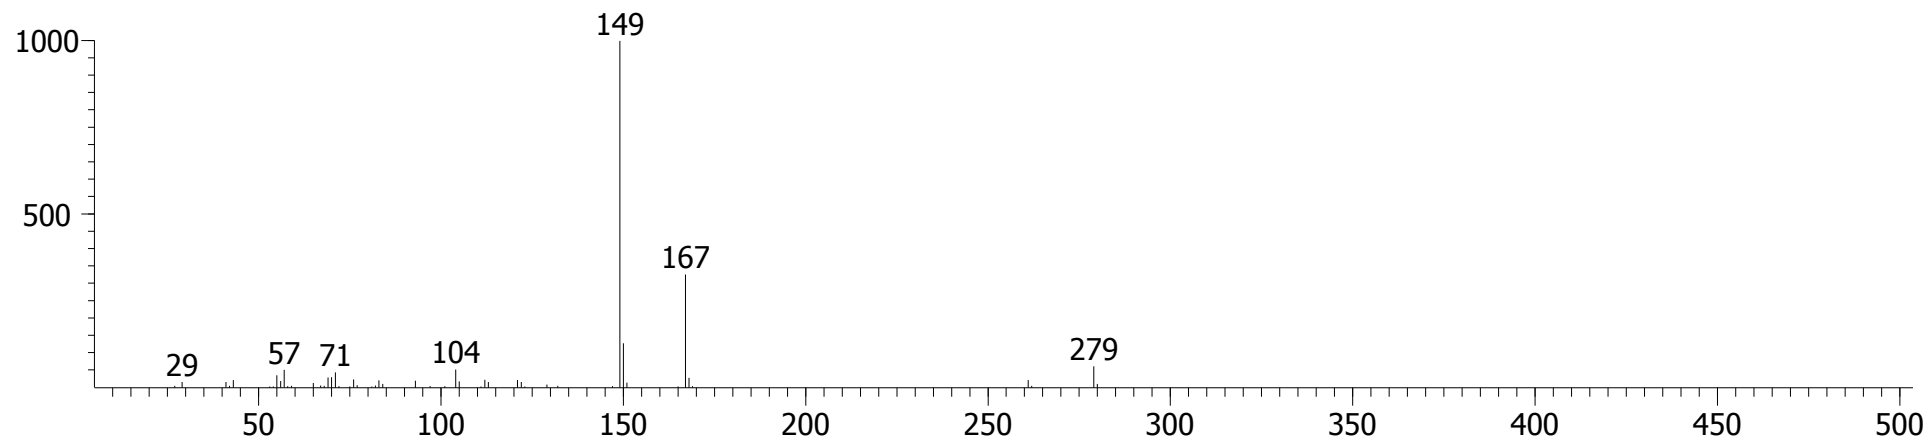

Sample 2, Fraction 1 (Hexane/DCM)

5H-1-Pyridine

CAS # = 270-91-7  
1st Dimension R.T. = 827.37  
2nd Dimension R.T. = 1.063  
Quant Mass(es) = 117  
S/N = 1164.7  
Area = 191775  
Height = 34766

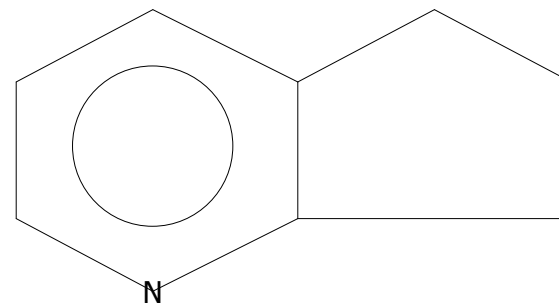

Peak True - sample "Lipid BM 2 F1:1", peak 455, at 827.37 , 1.063 sec , sec (Spec # 34611)

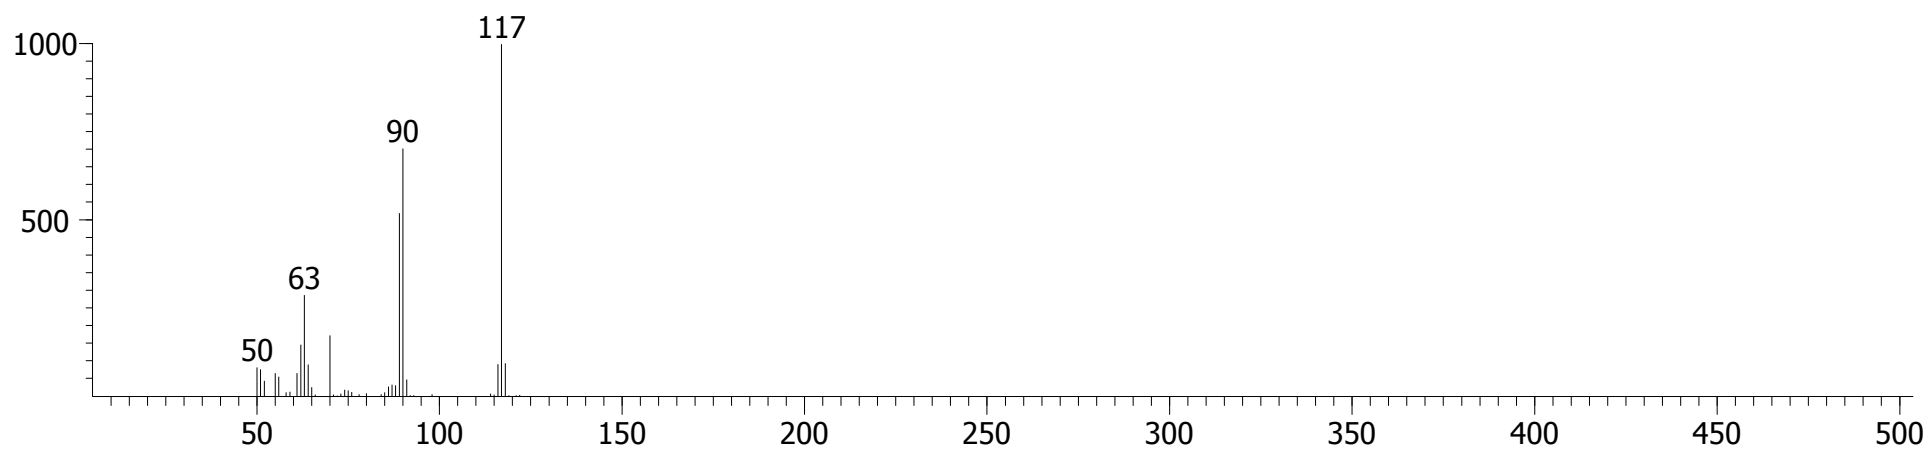

Library Hit - similarity 897, "5H-1-Pyridine"

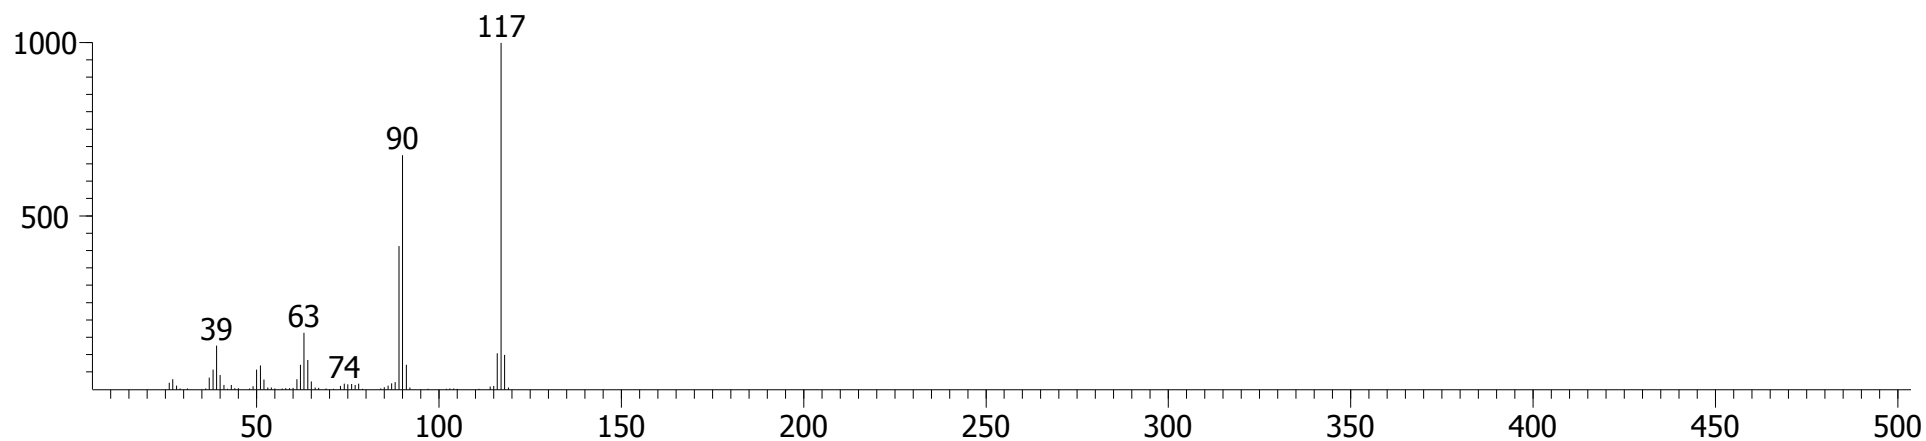



Sample 2, Fraction 1 (Hexane/DCM)

Acetamide, N-methyl-N-phenyl-

CAS # = 579-10-2  
1st Dimension R.T. = 830.868  
2nd Dimension R.T. = 1.010  
Quant Mass(es) = 149  
S/N = 538.87  
Area = 17365  
Height = 3082.7

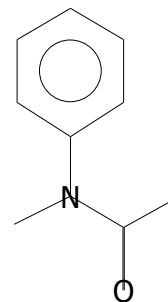

Peak True - sample "Lipid BM 2 F1:1", peak 461, at 830.868 , 1.010 sec , sec (Spec # 35133)

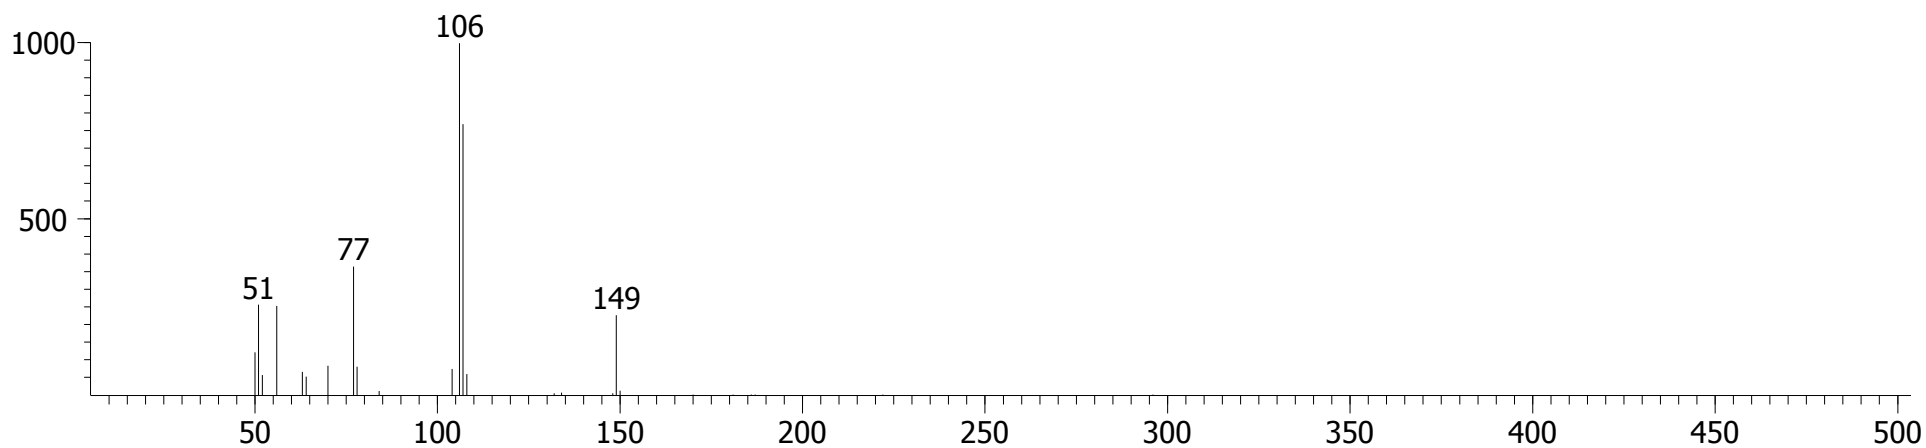

Library Hit - similarity 906, "Acetamide, N-methyl-N-phenyl-"

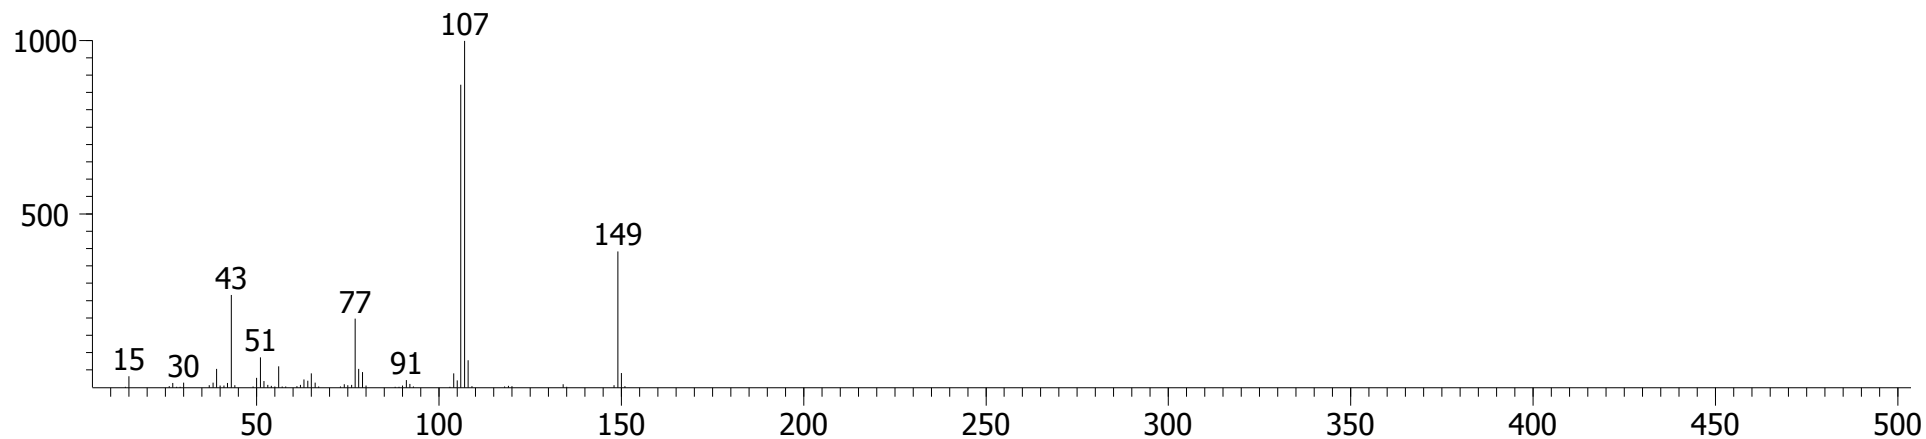

Sample 2, Fraction 1 (Hexane/DCM)

Naphthalene, 1-methyl-

CAS # = 90-12-0  
1st Dimension R.T. = 834.366  
2nd Dimension R.T. = 0.977  
Quant Mass(es) = 142  
S/N = 1720.4  
Area = 133026  
Height = 22643

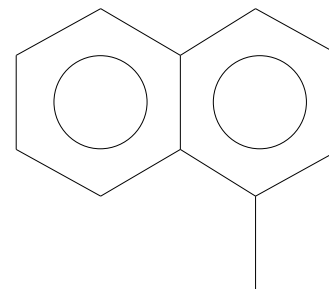

Peak True - sample "Lipid BM 2 F1:1", peak 466, at 834.366 , 0.977 sec , sec (Spec # 35658)

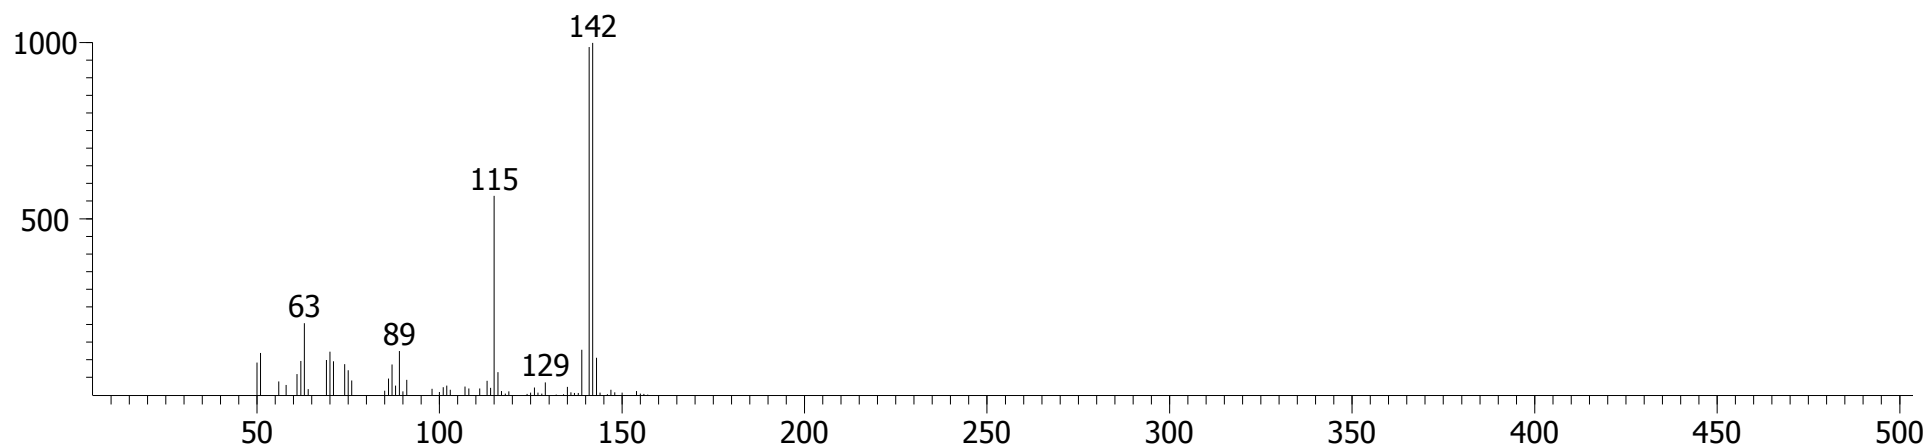

Library Hit - similarity 920, "Naphthalene, 1-methyl-"

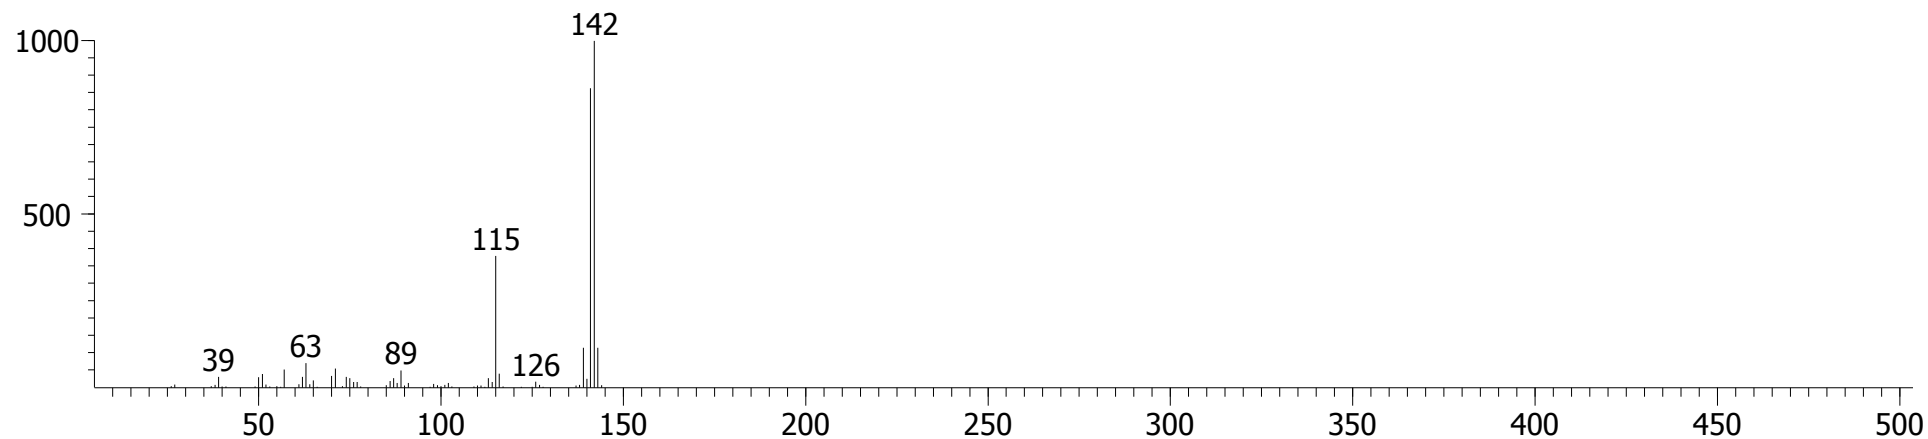

Sample 2, Fraction 1 (Hexane/DCM)

Indene, 1,1-dimethyl-1-sila-

CAS # = 58310-24-0  
1st Dimension R.T. = 855.354  
2nd Dimension R.T. = 0.924  
Quant Mass(es) = 160  
S/N = 239.76  
Area = 5884.4  
Height = 1003.1

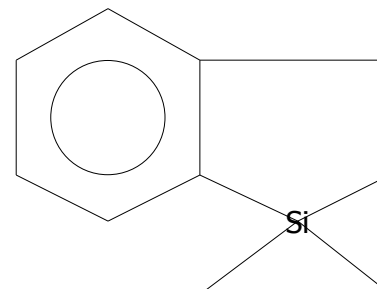

Peak True - sample "Lipid BM 2 F1:1", peak 511, at 855.354 , 0.924 sec , sec (Spec # 38830)

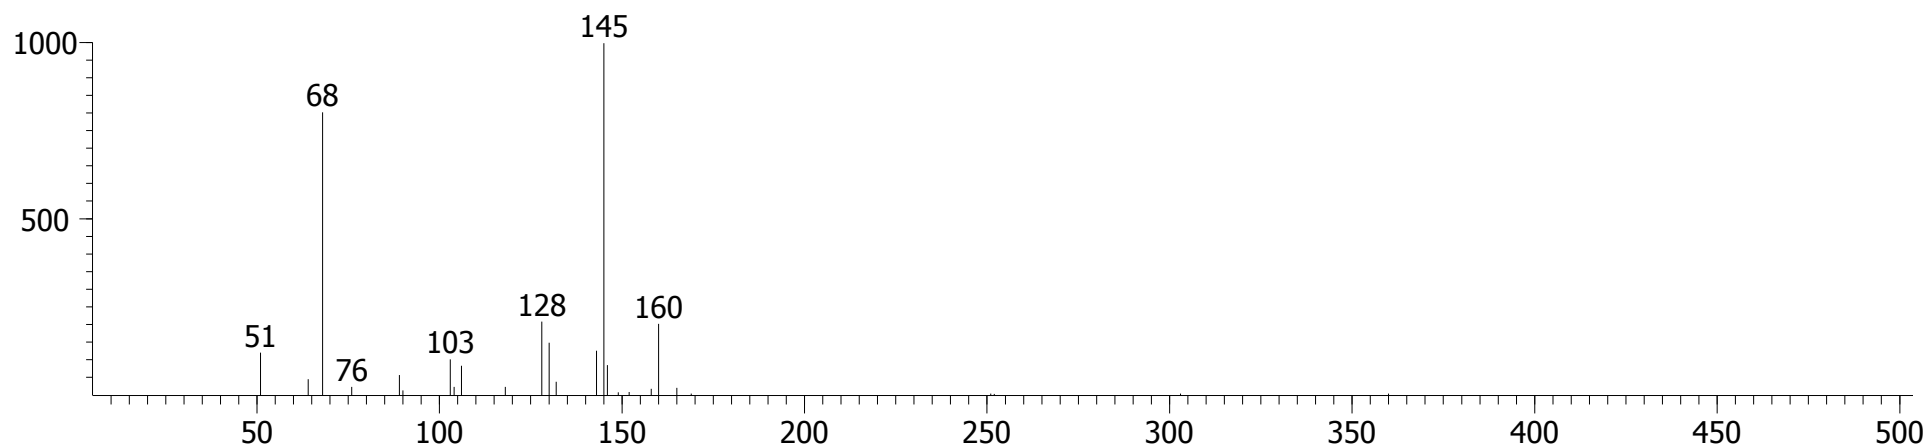

Library Hit - similarity 676, "Indene, 1,1-dimethyl-1-sila-"

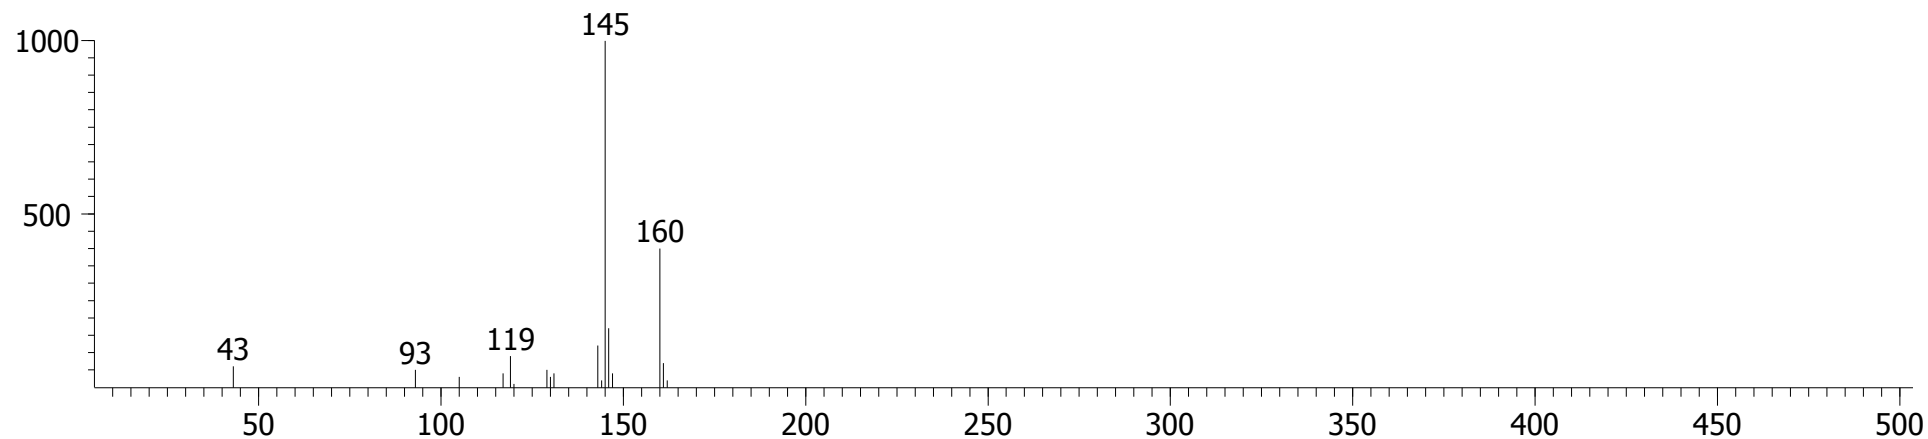

Sample 2, Fraction 1 (Hexane/DCM)

Naphthalene,  
1,2,3,4-tetrahydro-1,1,6-trimethyl-

CAS # = 475-03-6  
1st Dimension R.T. = 879.84  
2nd Dimension R.T. = 0.917  
Quant Mass(es) = 174  
S/N = 5617.5  
Area = 146621  
Height = 27648

(1,1,6-Trimethyltetralin)

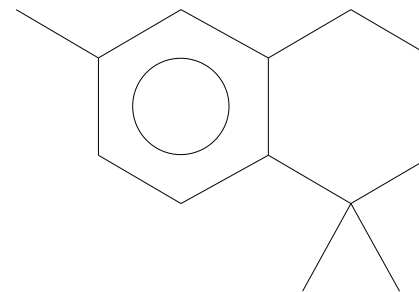

Peak True - sample "Lipid BM 2 F1:1", peak 562, at 879.84 , 0.917 sec , sec (Spec # 42539)

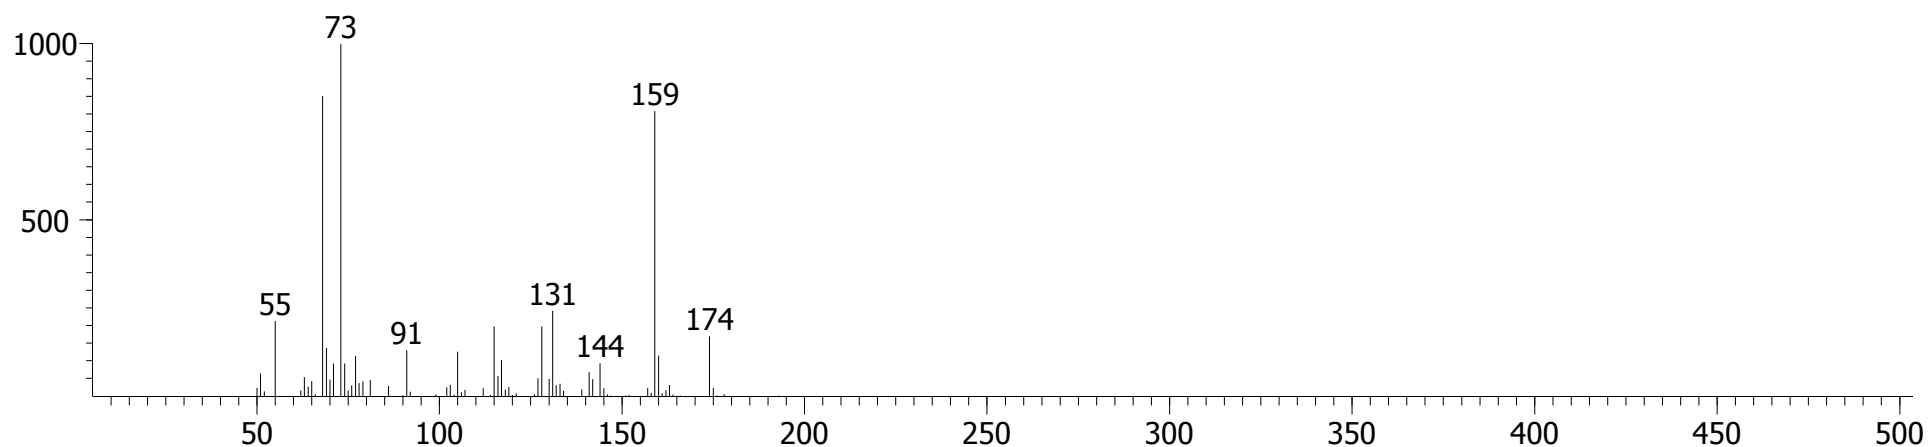

Library Hit - similarity 752, "Naphthalene, 1,2,3,4-tetrahydro-1,1,6-trimethyl-"



Sample 2, Fraction 1 (Hexane/DCM)

1H-Indene-1,3(2H)-dione

CAS # = 606-23-5  
1st Dimension R.T. = 879.84  
2nd Dimension R.T. = 1.076  
Quant Mass(es) = 146  
S/N = 114.39  
Area = 8856.5  
Height = 1407.2

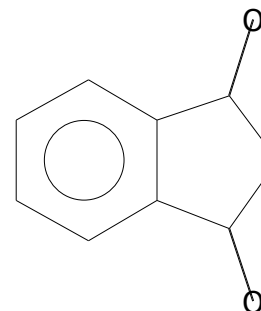

Peak True - sample "Lipid BM 2 F1:1", peak 564, at 879.84 , 1.076 sec , sec (Spec # 42563)

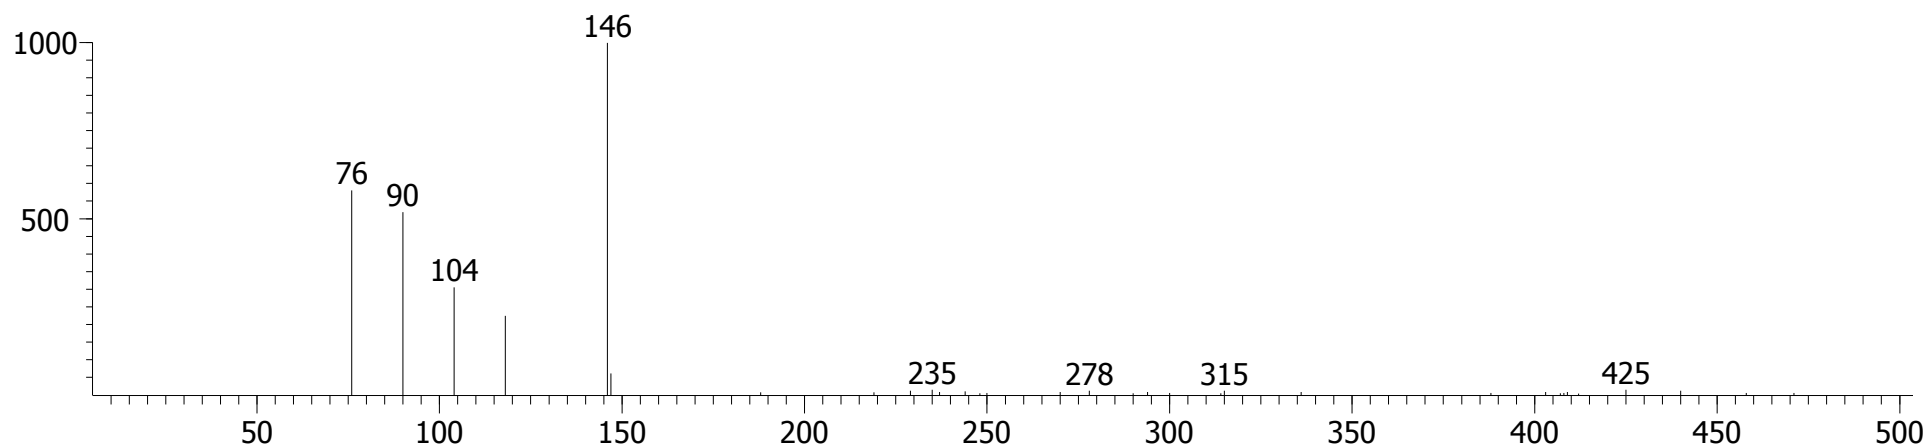

Library Hit - similarity 804, "1H-Indene-1,3(2H)-dione"

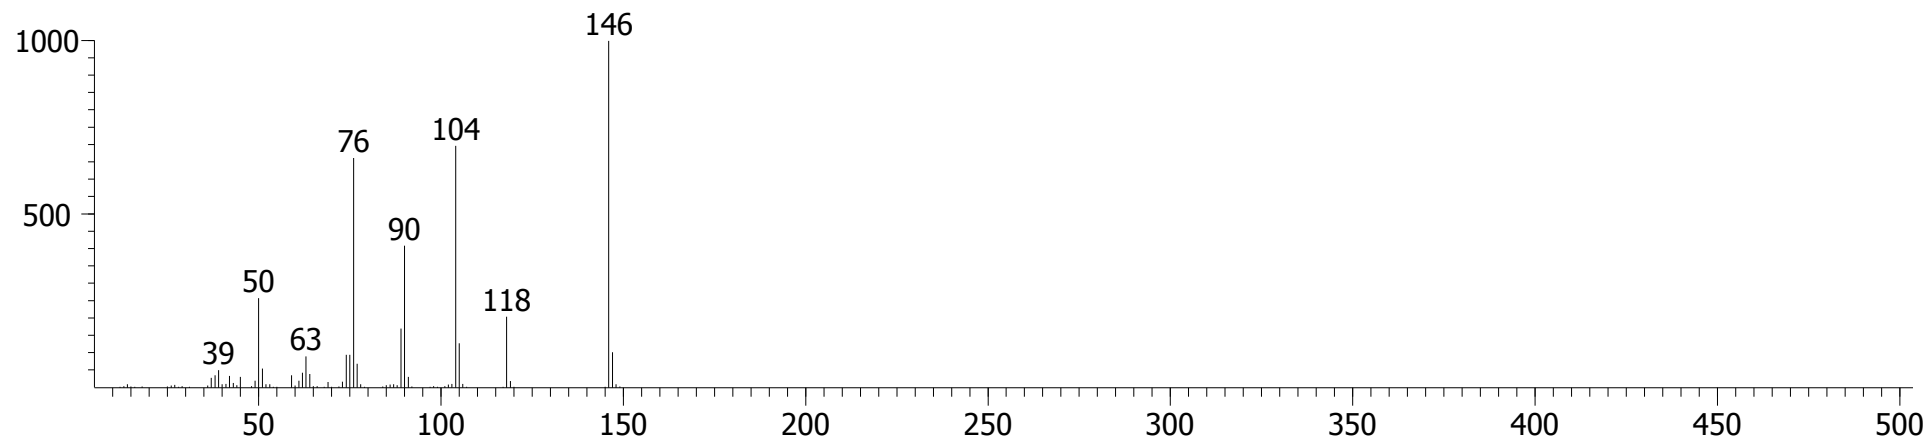

Sample 2, Fraction 1 (Hexane/DCM)

Benzoic acid, 2-(hydroxymethyl)-

(2-Hydroxymethylbenzoic acid)

CAS # = 612-20-4  
1st Dimension R.T. = 879.84  
2nd Dimension R.T. = 1.096  
Quant Mass(es) = 134  
S/N = 84.700  
Area = 24325  
Height = 3960.9



Peak True - sample "Lipid BM 2 F1:1", peak 565, at 879.84 , 1.096 sec , sec (Spec # 42566)

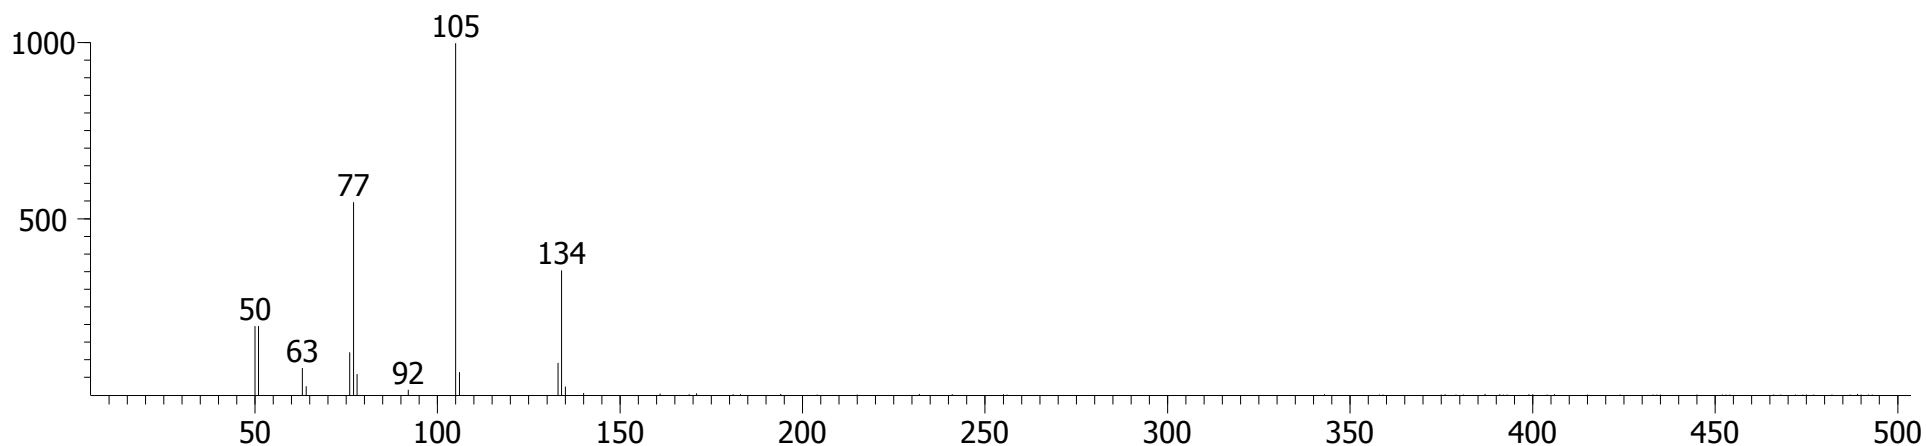

Library Hit - similarity 929, "Benzoic acid, 2-(hydroxymethyl)-"



Sample 2, Fraction 1 (Hexane/DCM)

Benzenamine, 4-chloro-N-methyl-

CAS # = 932-96-7  
1st Dimension R.T. = 904.326  
2nd Dimension R.T. = 0.924  
Quant Mass(es) = 140  
S/N = 163.99  
Area = 8206.8  
Height = 1597.3



(4-Chloro-N-methylaniline)

Peak True - sample "Lipid BM 2 F1:1", peak 604, at 904.326 , 0.924 sec , sec (Spec # 46250)

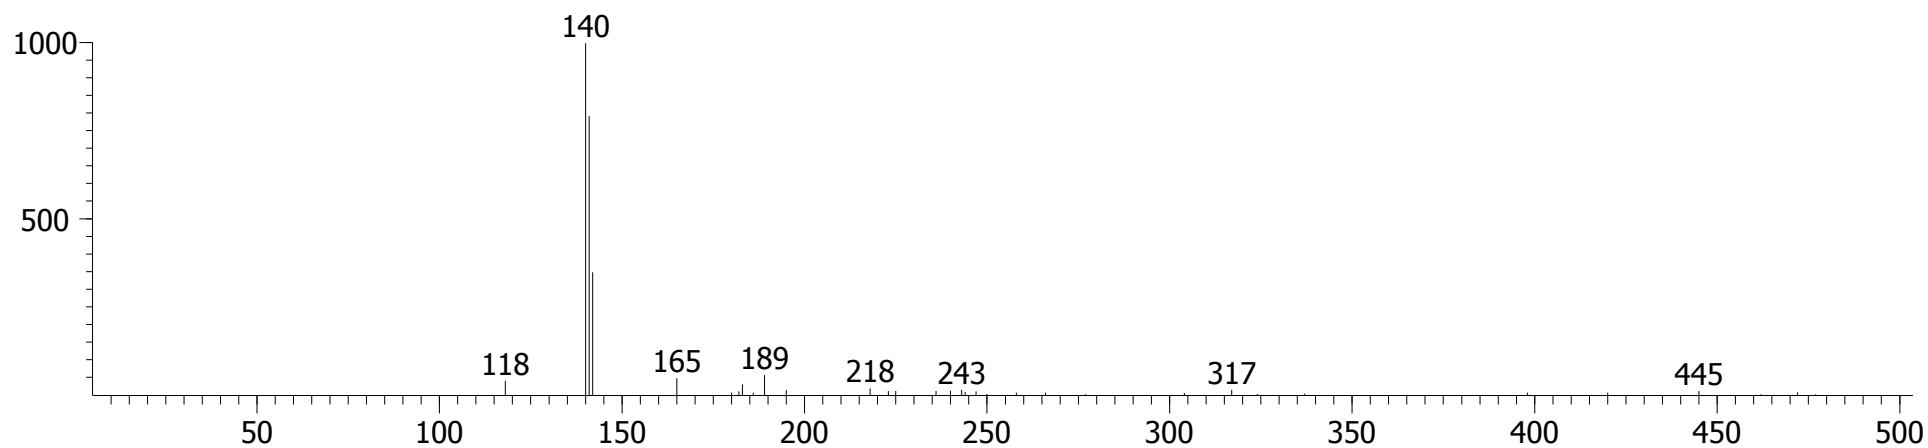

Library Hit - similarity 842, "Benzenamine, 4-chloro-N-methyl-"

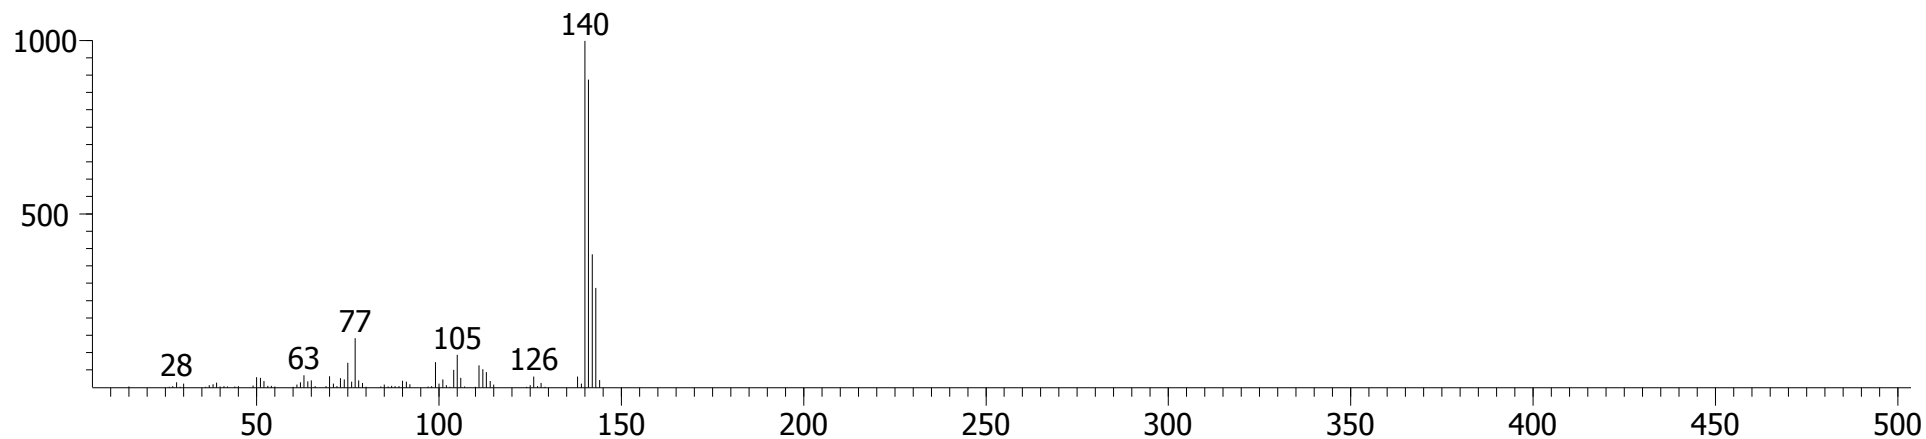

Sample 2, Fraction 1 (Hexane/DCM)

1H-Indole, 2-methyl-

CAS # = 95-20-5  
1st Dimension R.T. = 904.326  
2nd Dimension R.T. = 1.056  
Quant Mass(es) = 130  
S/N = 331.12  
Area = 610939  
Height = 35117

(2-Methylindole)



Peak True - sample "Lipid BM 2 F1:1", peak 606, at 904.326 , 1.056 sec , sec (Spec # 46270)

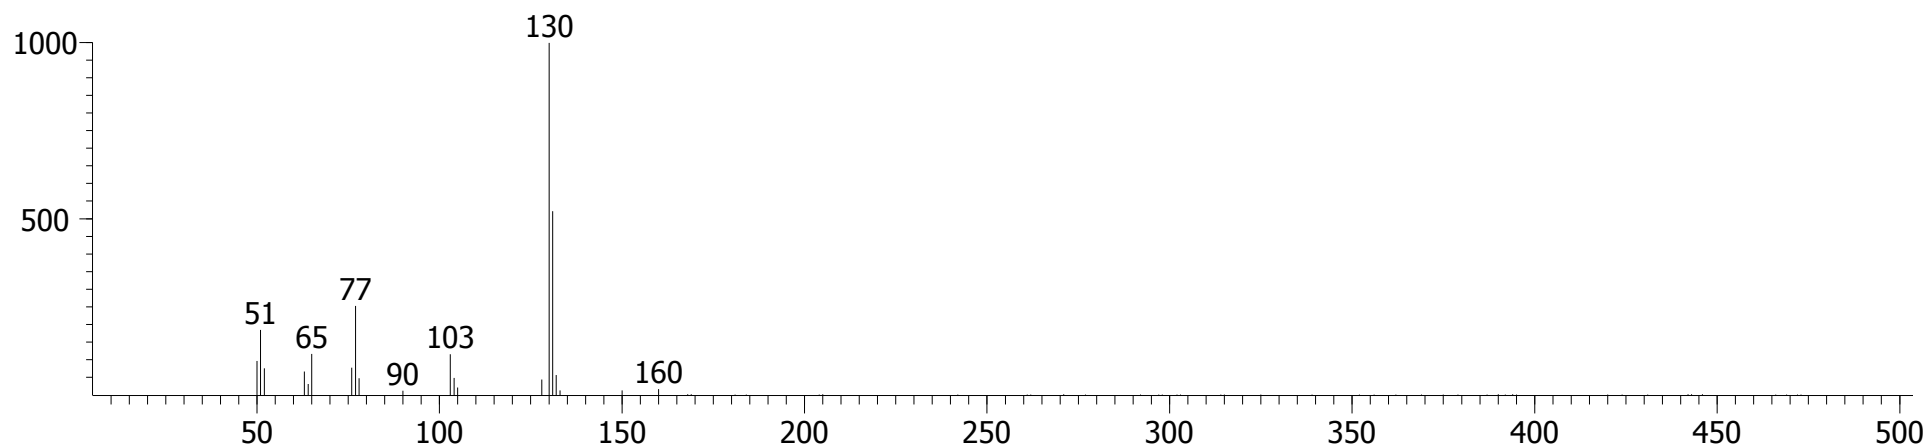

Library Hit - similarity 930, "1H-Indole, 2-methyl-"

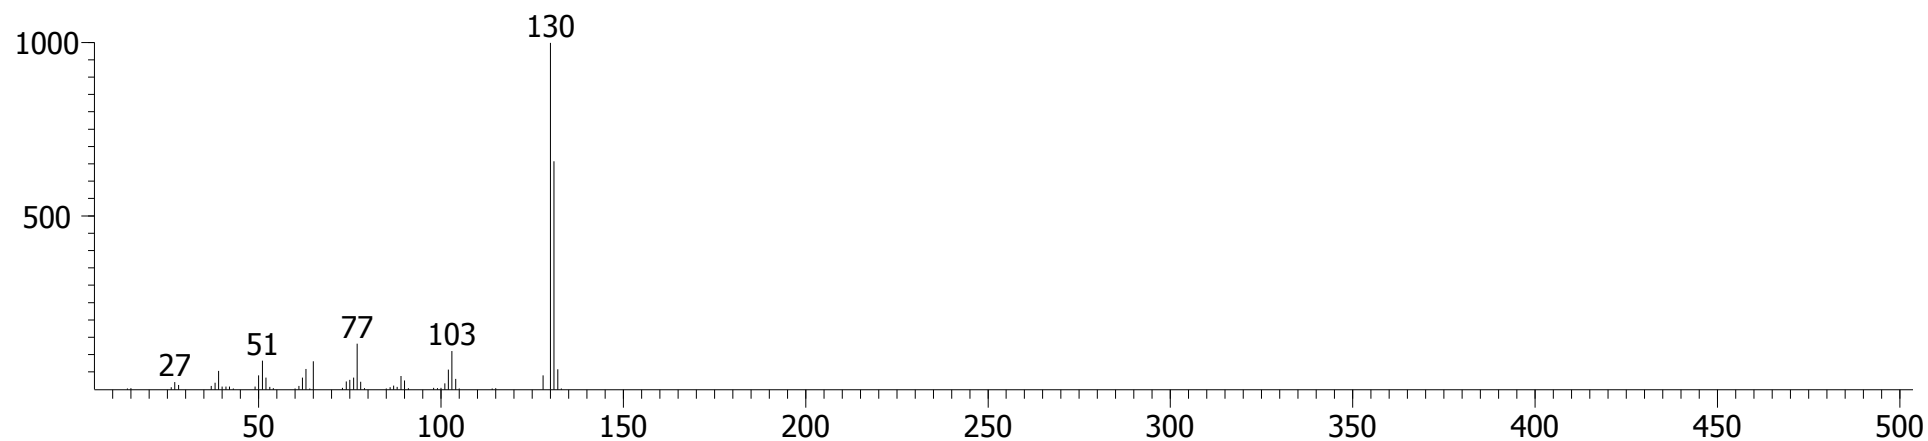



Sample 2, Fraction 1 (Hexane/DCM)

2(3H)-Benzofuranone, 3-methyl-

CAS # = 32267-71-3  
1st Dimension R.T. = 904.326  
2nd Dimension R.T. = 1.076  
Quant Mass(es) = 148  
S/N = 45.515  
Area = 6277.4  
Height = 912.50

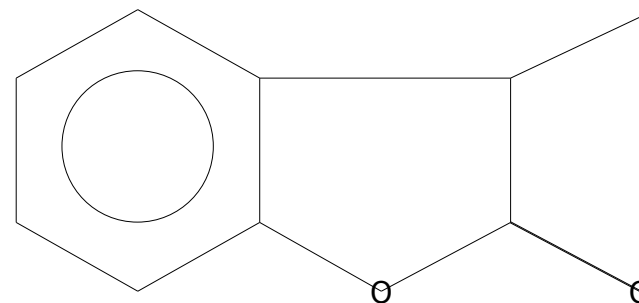

Peak True - sample "Lipid BM 2 F1:1", peak 607, at 904.326 , 1.076 sec , sec (Spec # 46273)

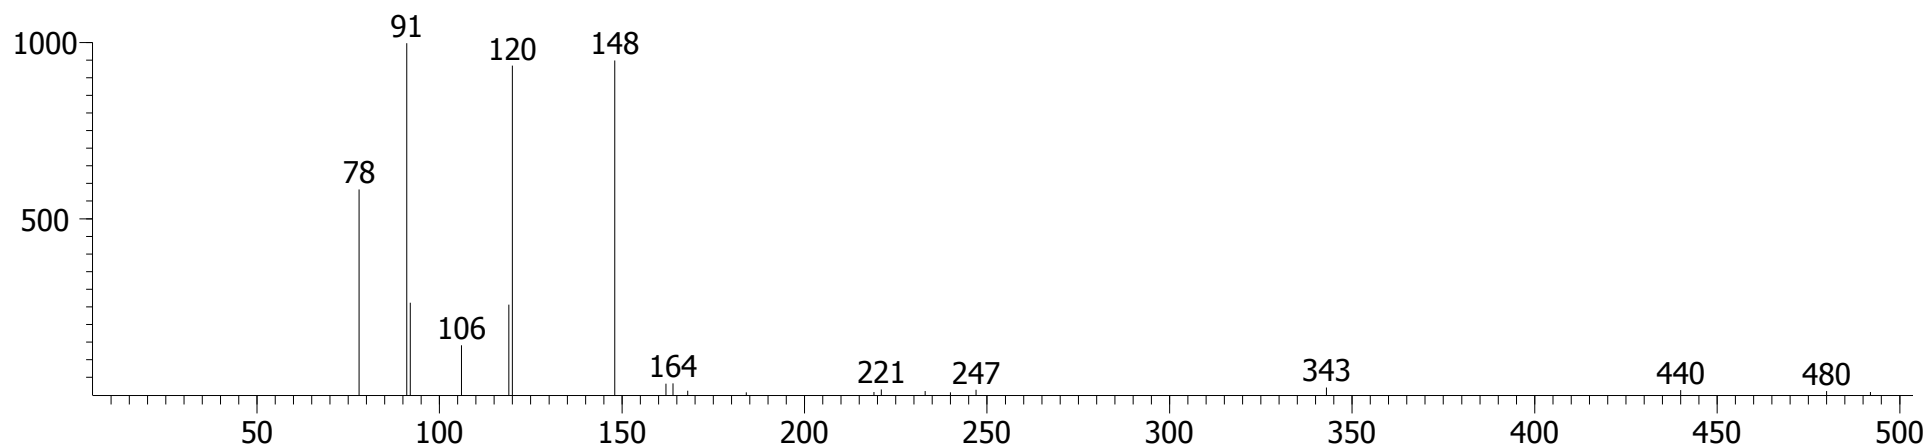

Library Hit - similarity 794, "2(3H)-Benzofuranone, 3-methyl-"

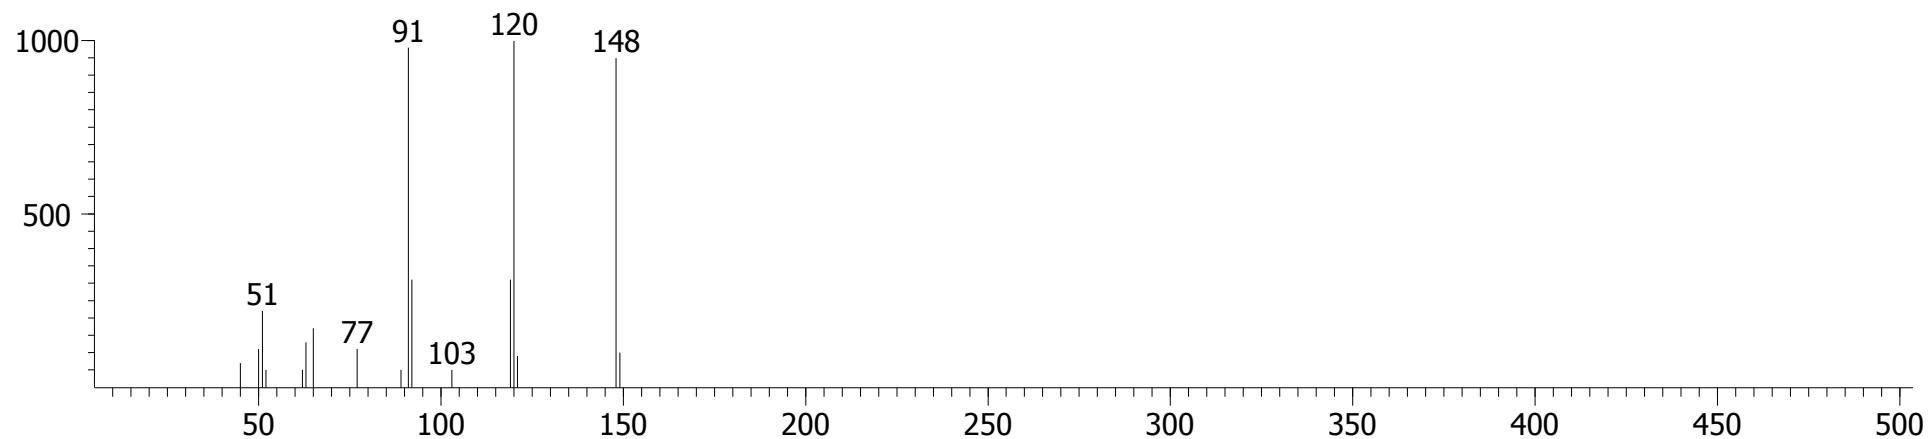

Sample 2, Fraction 1 (Hexane/DCM)

Naphthalene, 1,7-dimethyl-

CAS # = 575-37-1  
1st Dimension R.T. = 932.31  
2nd Dimension R.T. = 0.983  
Quant Mass(es) = 156  
S/N = 816.38  
Area = 105799  
Height = 16969

1,7-Dimethylnaphthalene

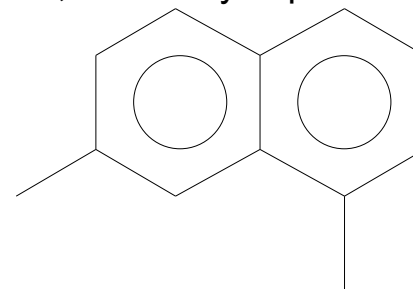

Peak True - sample "Lipid BM 2 F1:1", peak 676, at 932.31 , 0.983 sec , sec (Spec # 50499)

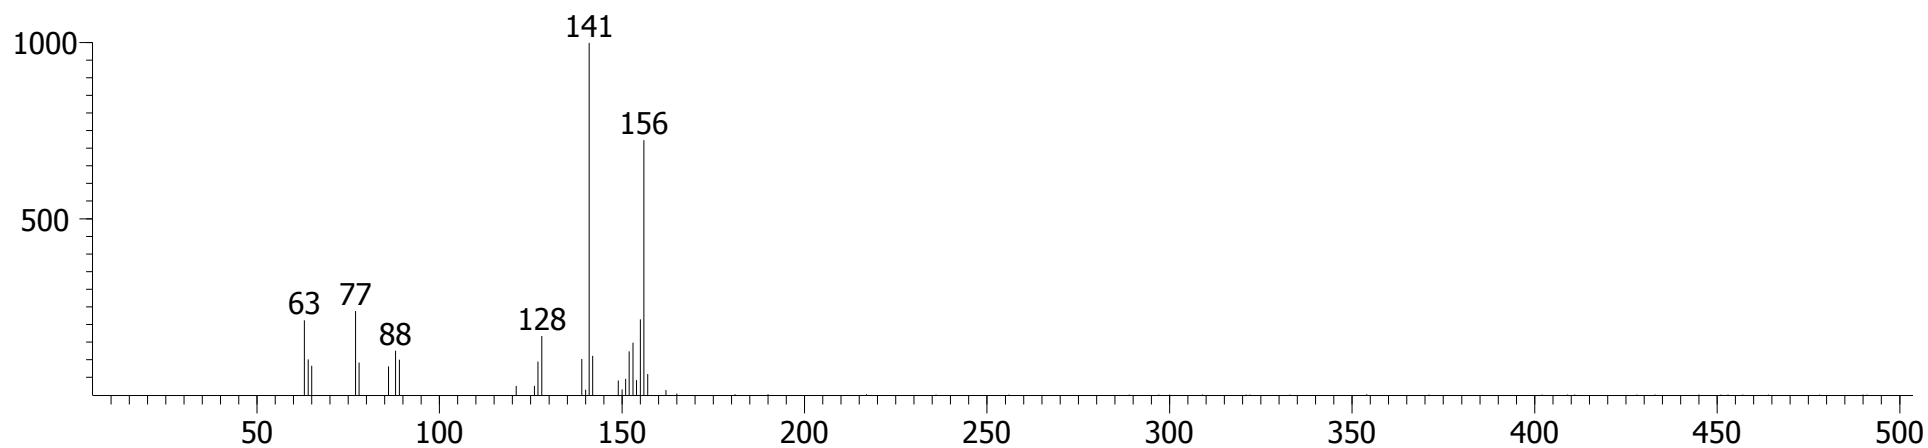

Library Hit - similarity 868, "Naphthalene, 1,7-dimethyl-"



Sample 2, Fraction 1 (Hexane/DCM)

Ethanone, 1,1'-(1,3-phenylene)bis-

(1,3-Diacetylbenzene)

CAS # = 6781-42-6  
1st Dimension R.T. = 935.808  
2nd Dimension R.T. = 1.043  
Quant Mass(es) = 162  
S/N = 230.43  
Area = 19357  
Height = 2757.9



Peak True - sample "Lipid BM 2 F1:1", peak 689, at 935.808 , 1.043 sec , sec (Spec # 51038)

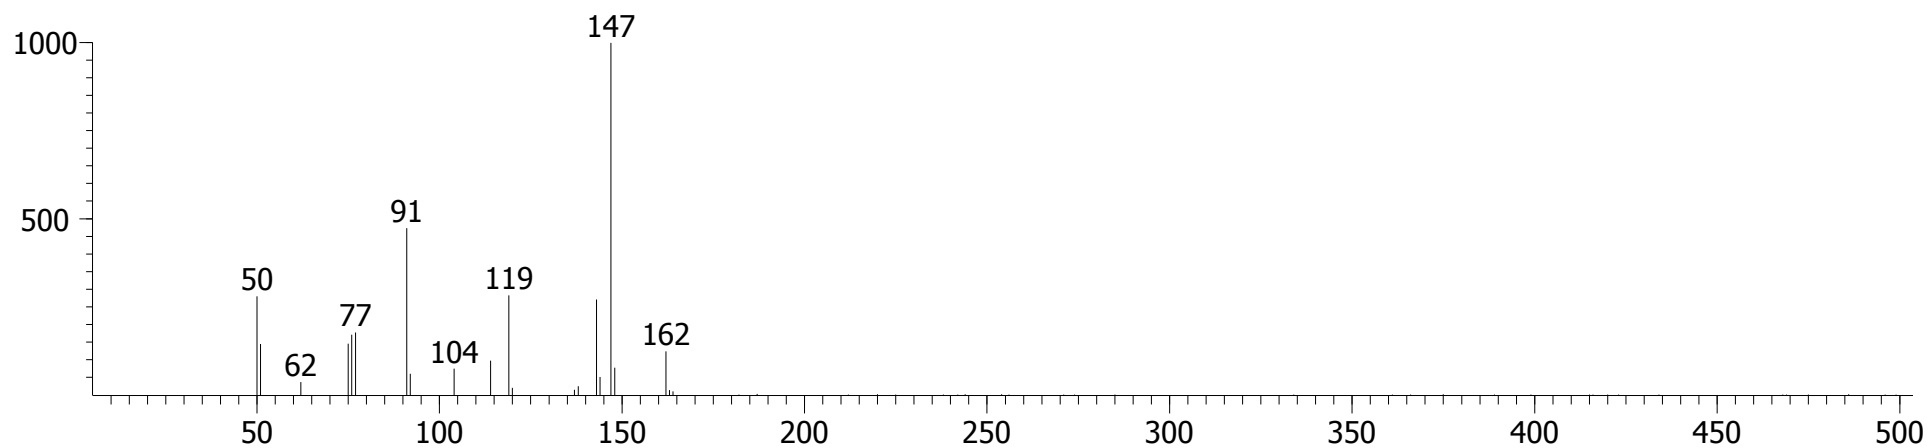

Library Hit - similarity 820, "Ethanone, 1,1'-(1,3-phenylene)bis-"



Sample 2, Fraction 1 (Hexane/DCM)

Benzaldehyde, 4-pentyl-

CAS # = 6853-57-2  
1st Dimension R.T. = 949.8  
2nd Dimension R.T. = 0.944  
Quant Mass(es) = 176  
S/N = 2537.1  
Area = 165746  
Height = 26423



Peak True - sample "Lipid BM 2 F1:1", peak 724, at 949.8 , 0.944 sec , sec (Spec # 53143)

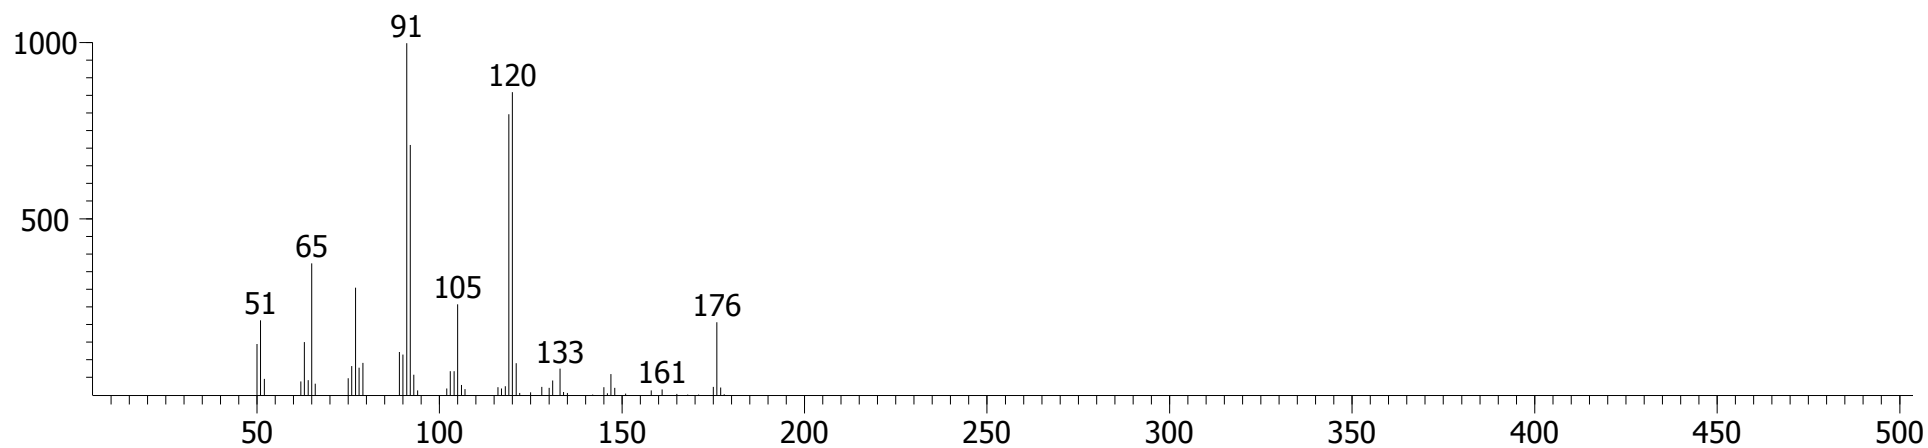

Library Hit - similarity 857, "Benzaldehyde, 4-pentyl-"



Sample 2, Fraction 1 (Hexane/DCM)

1-Propanone, 1-(2,4-dimethylphenyl)-

CAS # = 35031-55-1  
1st Dimension R.T. = 956.796  
2nd Dimension R.T. = 1.056  
Quant Mass(es) = 162  
S/N = 59.931  
Area = 68515  
Height = 10221

(2,4-Dimethylpropiophenone)



Peak True - sample "Lipid BM 2 F1:1", peak 739, at 956.796 , 1.056 sec , sec (Spec # 54220)

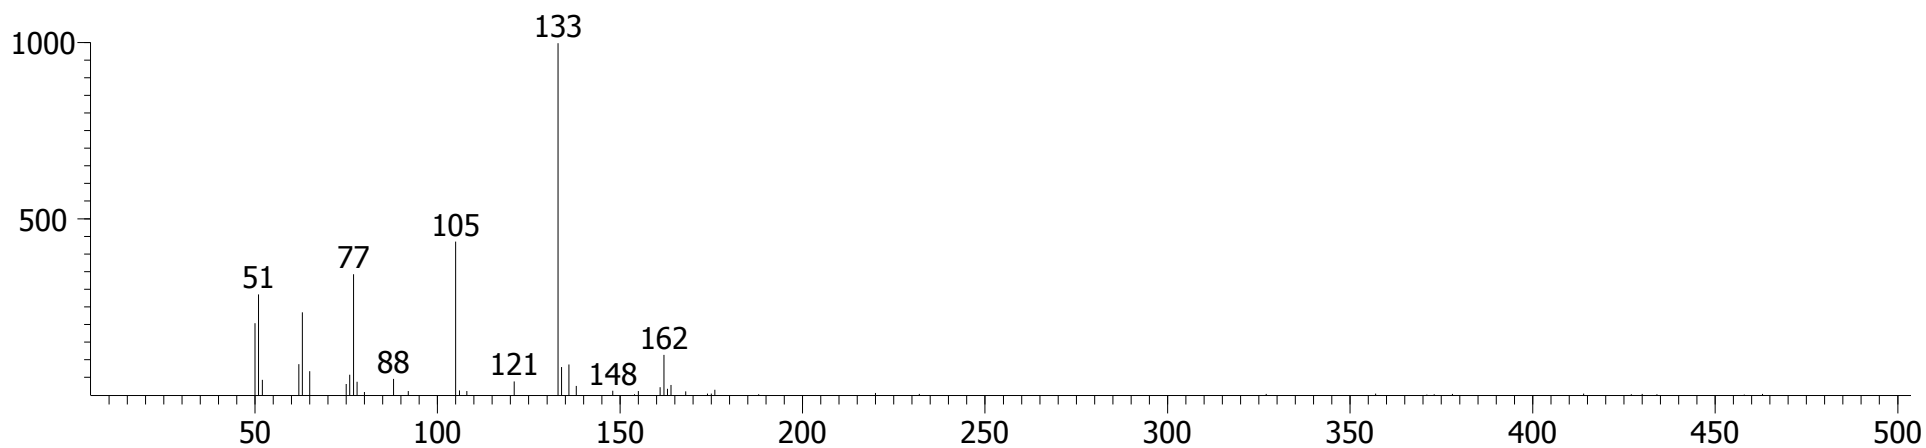

Library Hit - similarity 804, "1-Propanone, 1-(2,4-dimethylphenyl)-"

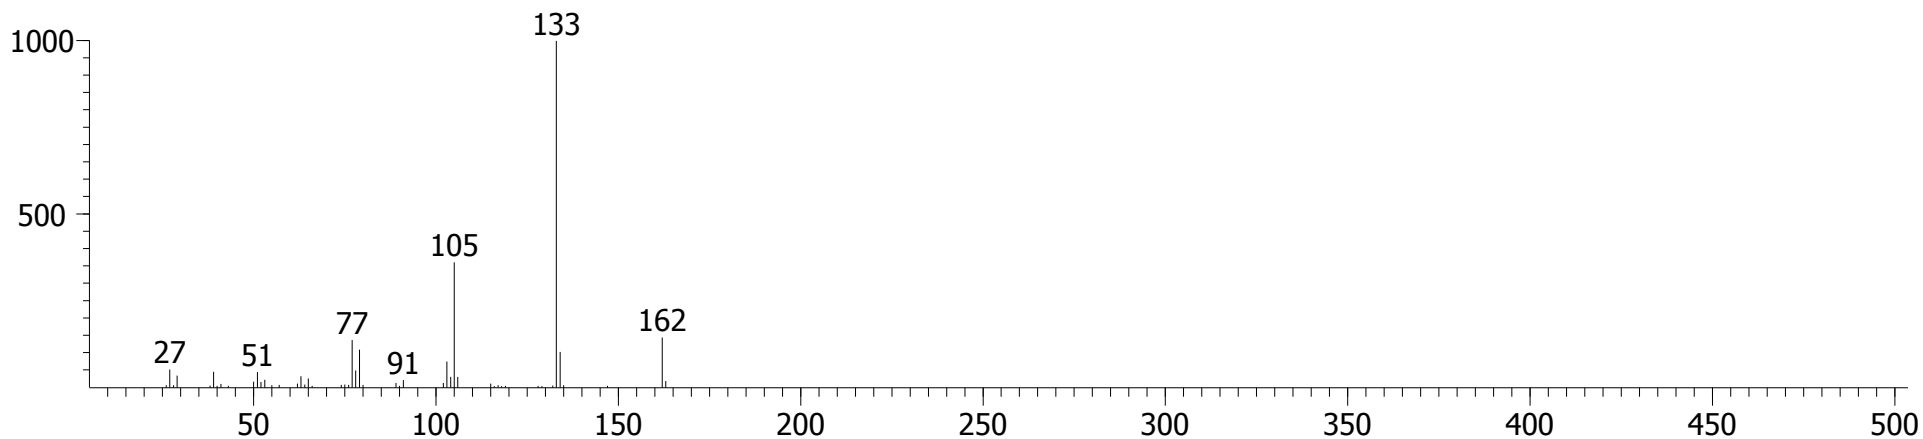

Sample 2, Fraction 1 (Hexane/DCM)

1,1'-Biphenyl, 4-methyl-

(4-Methylbiphenyl)

CAS # = 644-08-6  
1st Dimension R.T. = 974.286  
2nd Dimension R.T. = 0.990  
Quant Mass(es) = 168  
S/N = 314.61  
Area = 14605  
Height = 2767.3



Peak True - sample "Lipid BM 2 F1:1", peak 767, at 974.286 , 0.990 sec , sec (Spec # 56860)

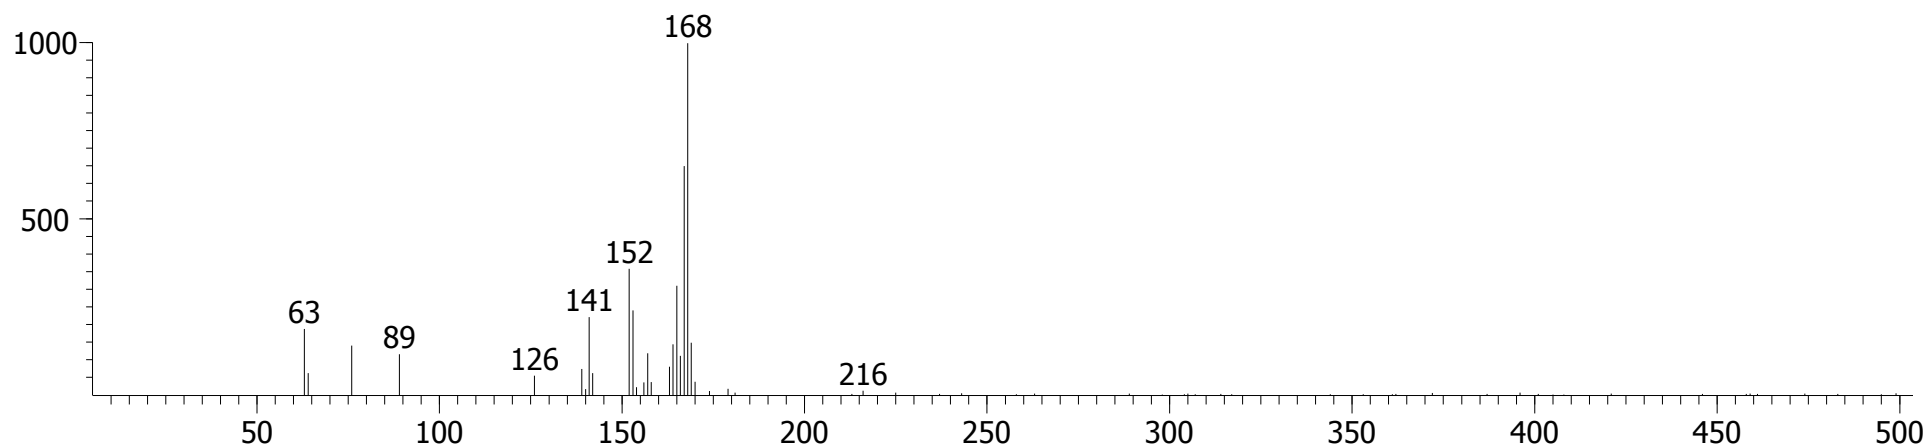

Library Hit - similarity 823, "1,1'-Biphenyl, 4-methyl-"



Sample 2, Fraction 1 (Hexane/DCM)

UNKNOWN # 2

CAS # = 5202-86-8  
1st Dimension R.T. = 988.278  
2nd Dimension R.T. = 1.036  
Quant Mass(es) = 183  
S/N = 2550.3  
Area = 172998  
Height = 33895



Peak True - sample "Lipid BM 2 F1:1", peak 805, at 988.278 , 1.036 sec , sec (Spec # 58987)

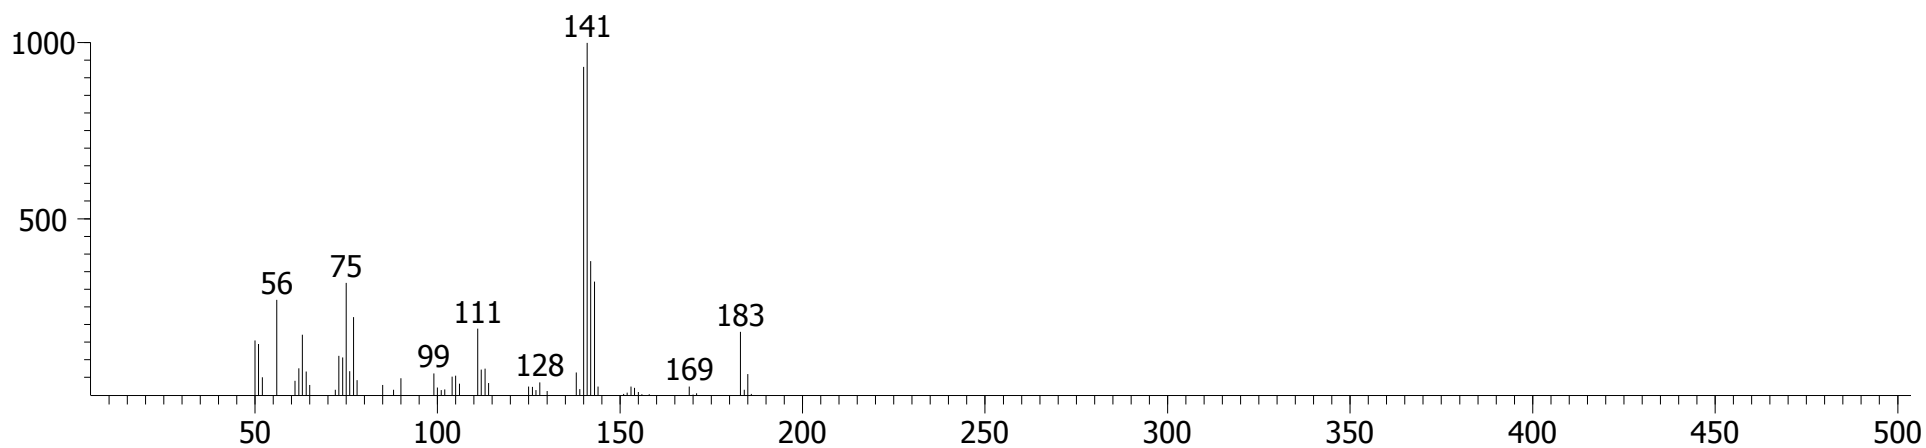

Library Hit - similarity 717, "Acetamide, N-(4-chloro-2-methylphenyl)-"

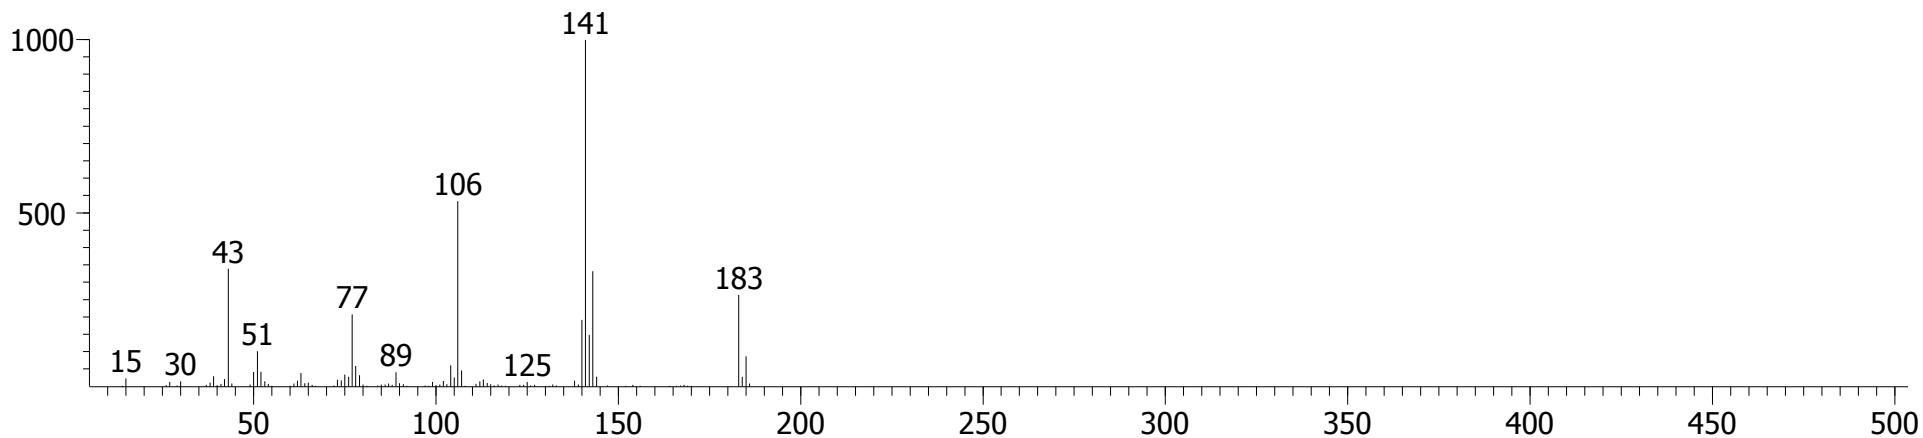

Sample 2, Fraction 1 (Hexane/DCM)

Benzoic acid, 4-ethoxy-, ethyl ester

CAS # = 23676-09-7  
1st Dimension R.T. = 1002.27  
2nd Dimension R.T. = 0.964  
Quant Mass(es) = 194  
S/N = 13951  
Area = 913335  
Height = 163852

(Ethyl 4-ethoxybenzoate)

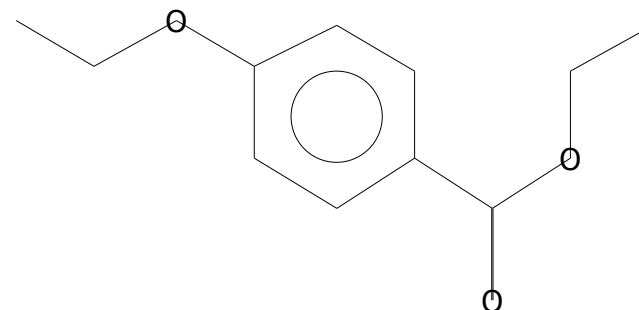

Peak True - sample "Lipid BM 2 F1:1", peak 830, at 1002.27 , 0.964 sec , sec (Spec # 61096)

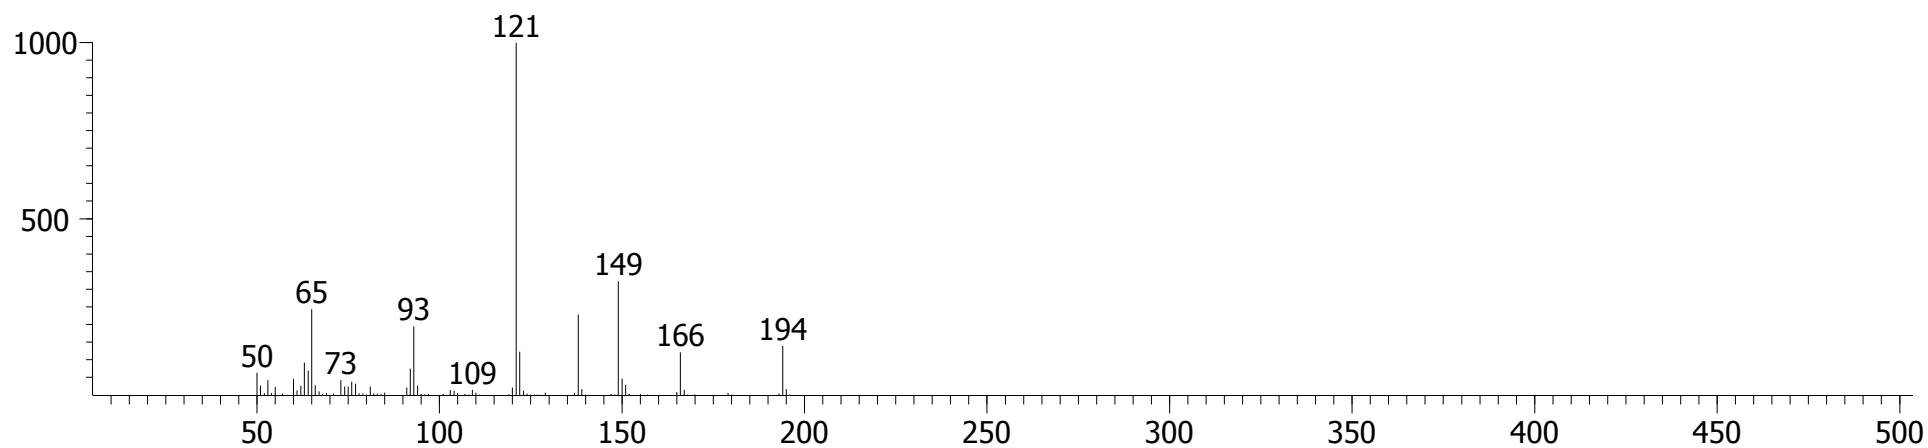

Library Hit - similarity 927, "Benzoic acid, 4-ethoxy-, ethyl ester"

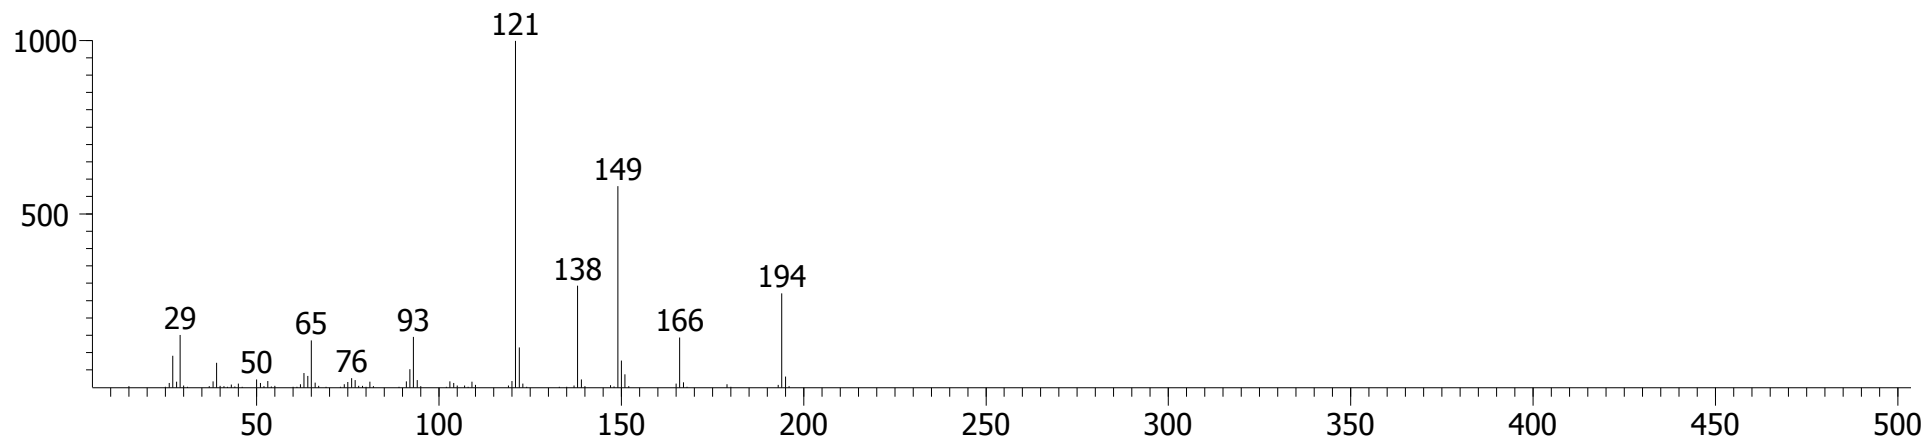



# Sample 2, Fraction 1 (Hexane/DCM)

## Benzoic acid

CAS # = 65-85-0  
1st Dimension R.T. = 1033.75  
2nd Dimension R.T. = 0.799  
Quant Mass(es) = 122  
S/N = 611.53  
Area = 273211  
Height = 53973



Peak True - sample "Lipid BM 2 F1:1", peak 909, at 1033.75 , 0.799 sec , sec (Spec # 65841)

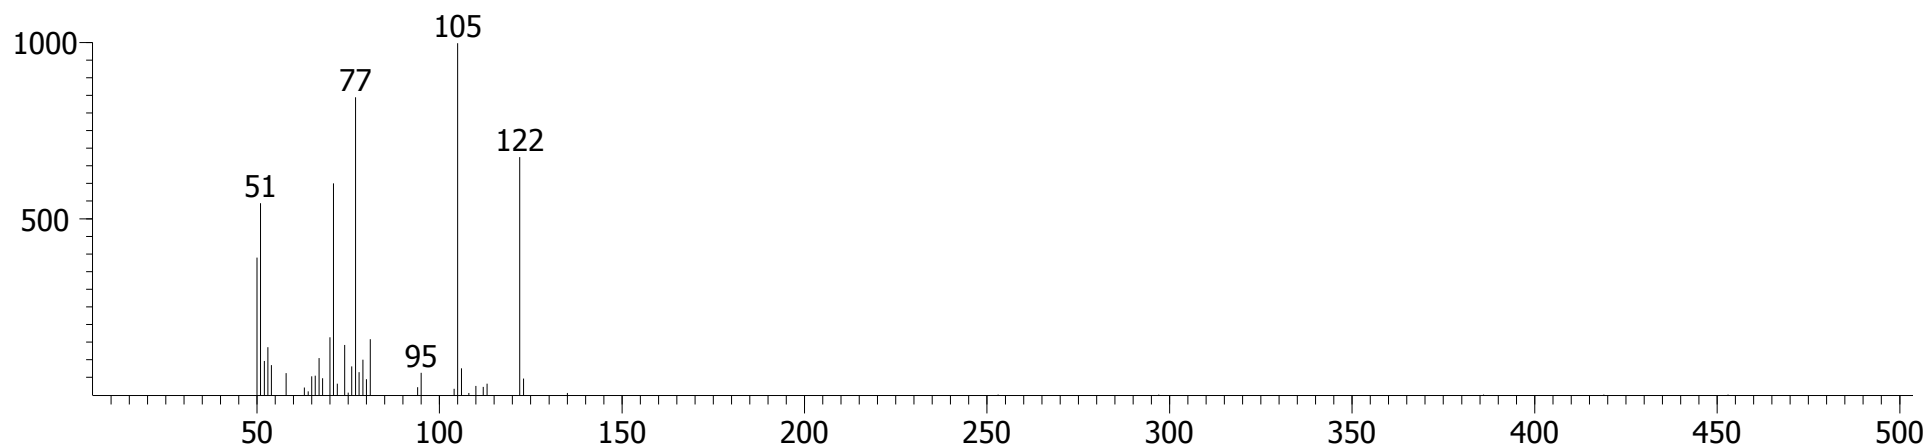

Library Hit - similarity 772, "Benzoic acid"

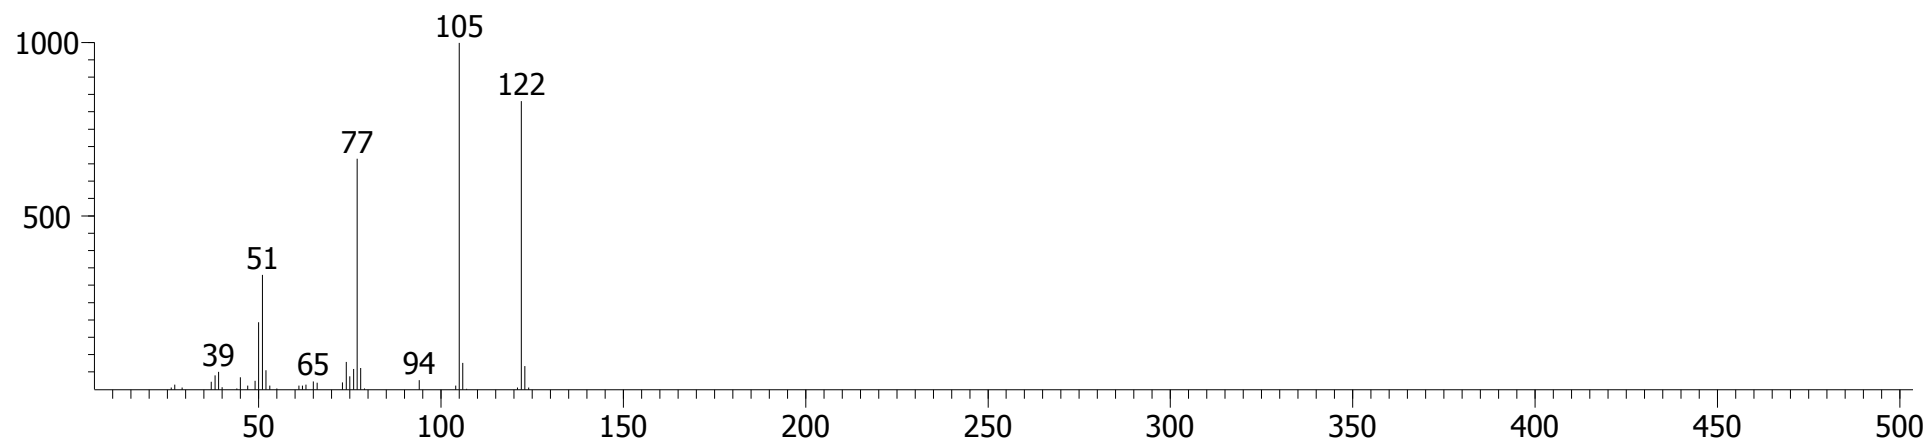

Sample 2, Fraction 1 (Hexane/DCM)

Benzophenone

CAS # = 119-61-9  
1st Dimension R.T. = 1086.22  
2nd Dimension R.T. = 1.063  
Quant Mass(es) = 182  
S/N = 3499.8  
Area = 693703  
Height = 106478

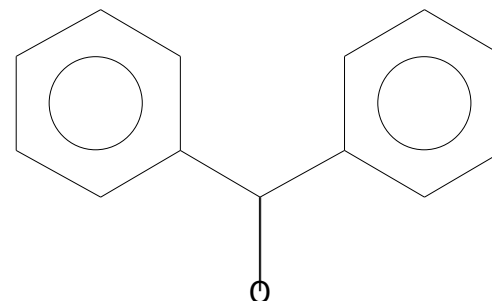

Peak True - sample "Lipid BM 2 F1:1", peak 1073, at 1086.22 , 1.063 sec , sec (Spec # 73831)

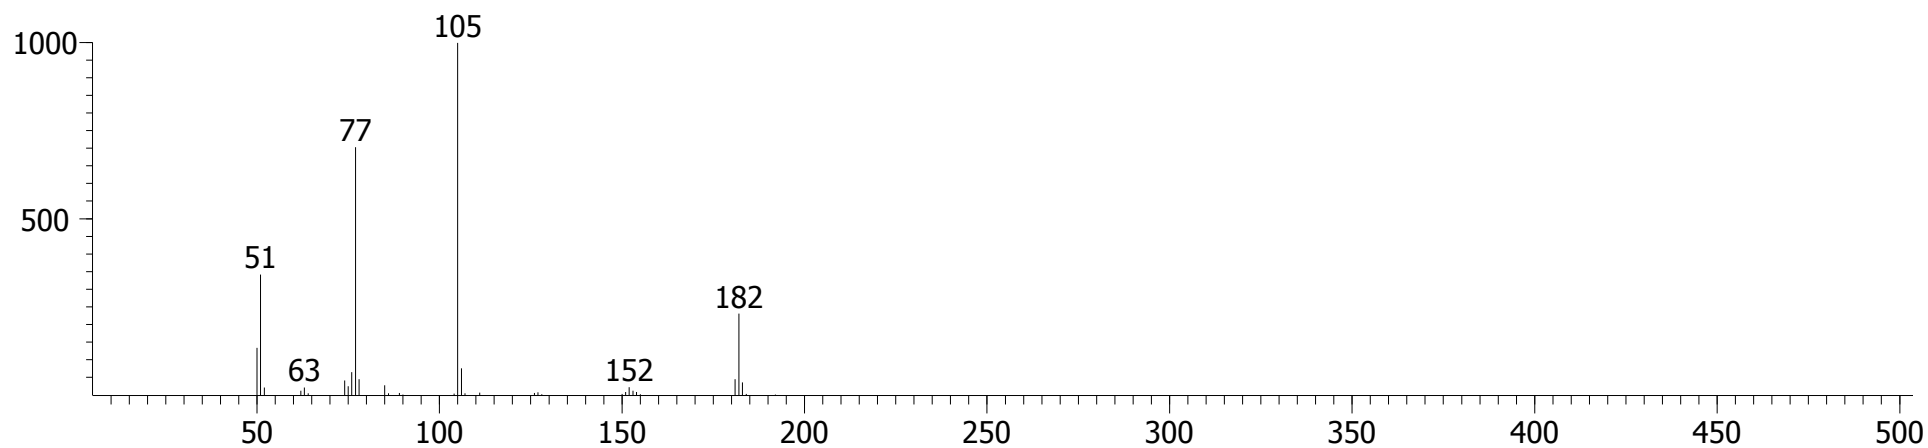

Library Hit - similarity 917, "Benzophenone"



Sample 2, Fraction 1 (Hexane/DCM)

Benzenamine, 4-chloro-N-methyl-

CAS # = 932-96-7  
1st Dimension R.T. = 1089.72  
2nd Dimension R.T. = 0.805  
Quant Mass(es) = 140  
S/N = 61.145  
Area = 14534  
Height = 3045.8



(4-Chloro-N-methylaniline)

Peak True - sample "Lipid BM 2 F1:1", peak 1074, at 1089.72 , 0.805 sec , sec (Spec # 74322)

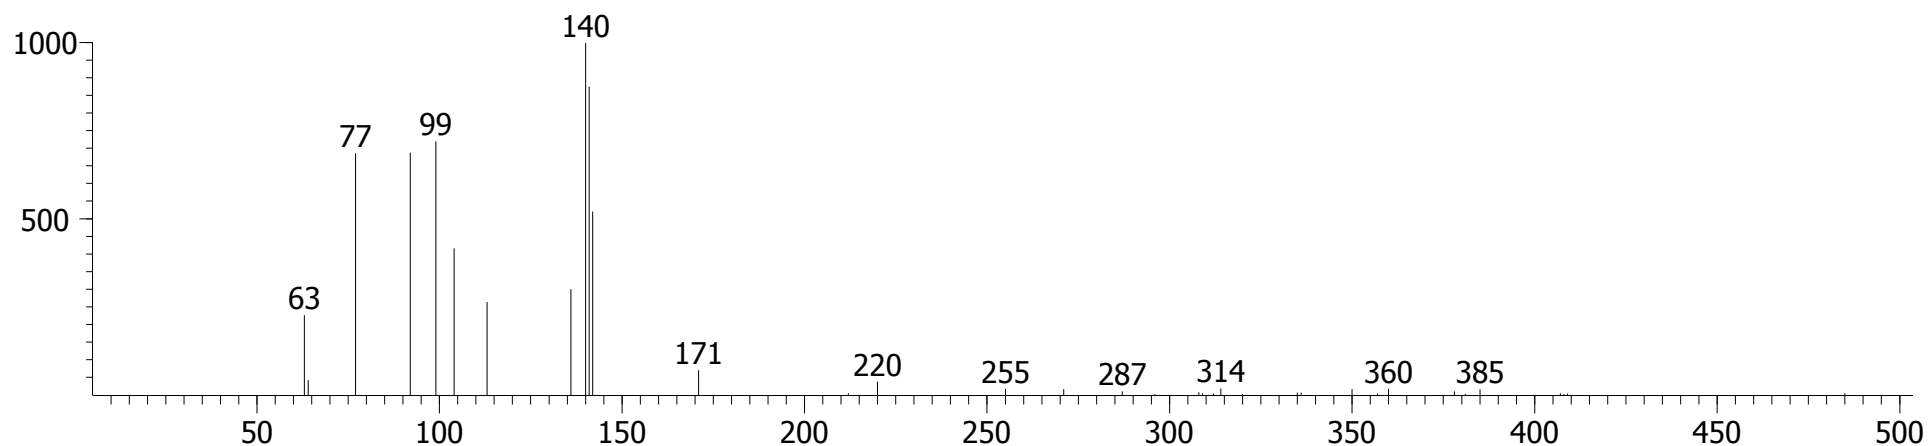

Library Hit - similarity 651, "Benzenamine, 4-chloro-N-methyl-"

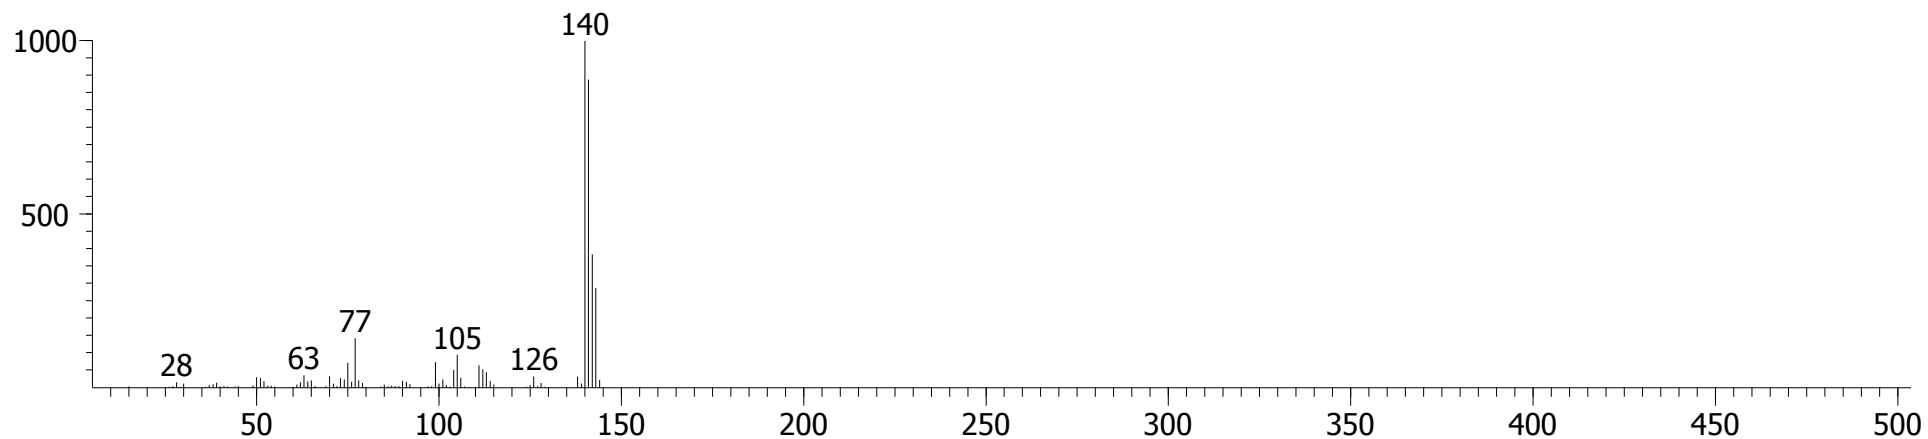

Sample 2, Fraction 1 (Hexane/DCM)

2-Pyrrolidinone, 1-phenyl-

CAS # = 4641-57-0  
1st Dimension R.T. = 1107.21  
2nd Dimension R.T. = 1.129  
Quant Mass(es) = 161  
S/N = 150.54  
Area = 8904.9  
Height = 824.16



Peak True - sample "Lipid BM 2 F1:1", peak 1128, at 1107.21 , 1.129 sec , sec (Spec # 77021)

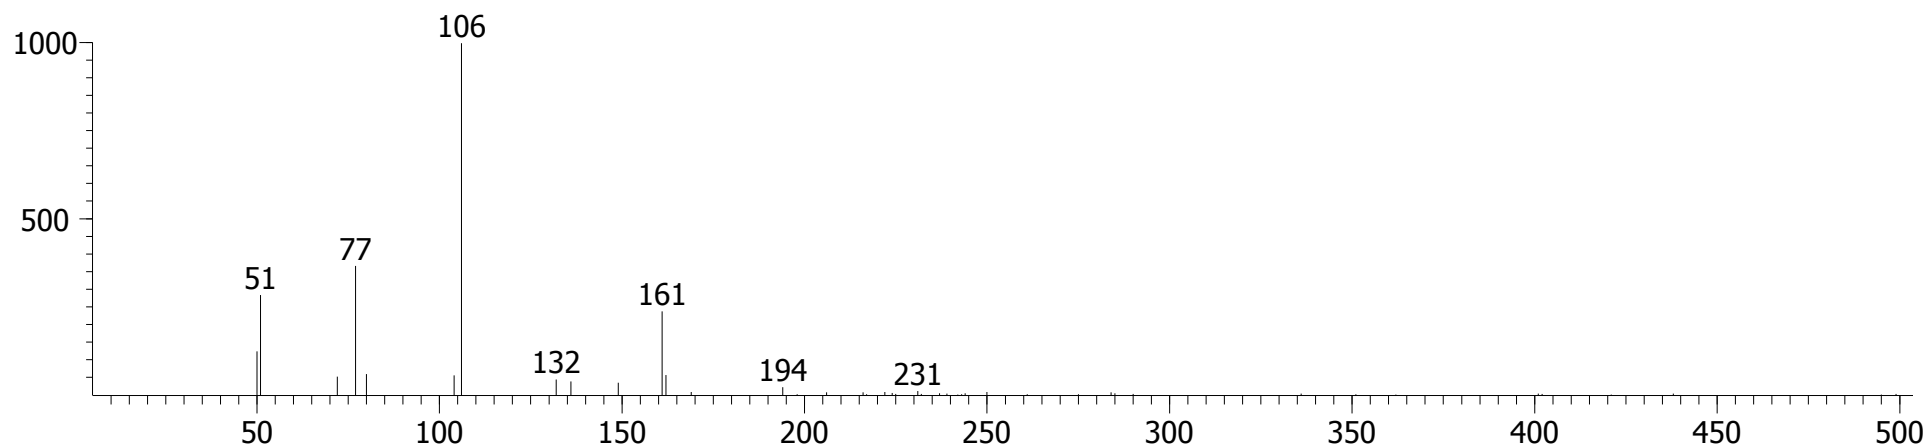

Library Hit - similarity 840, "2-Pyrrolidinone, 1-phenyl-"

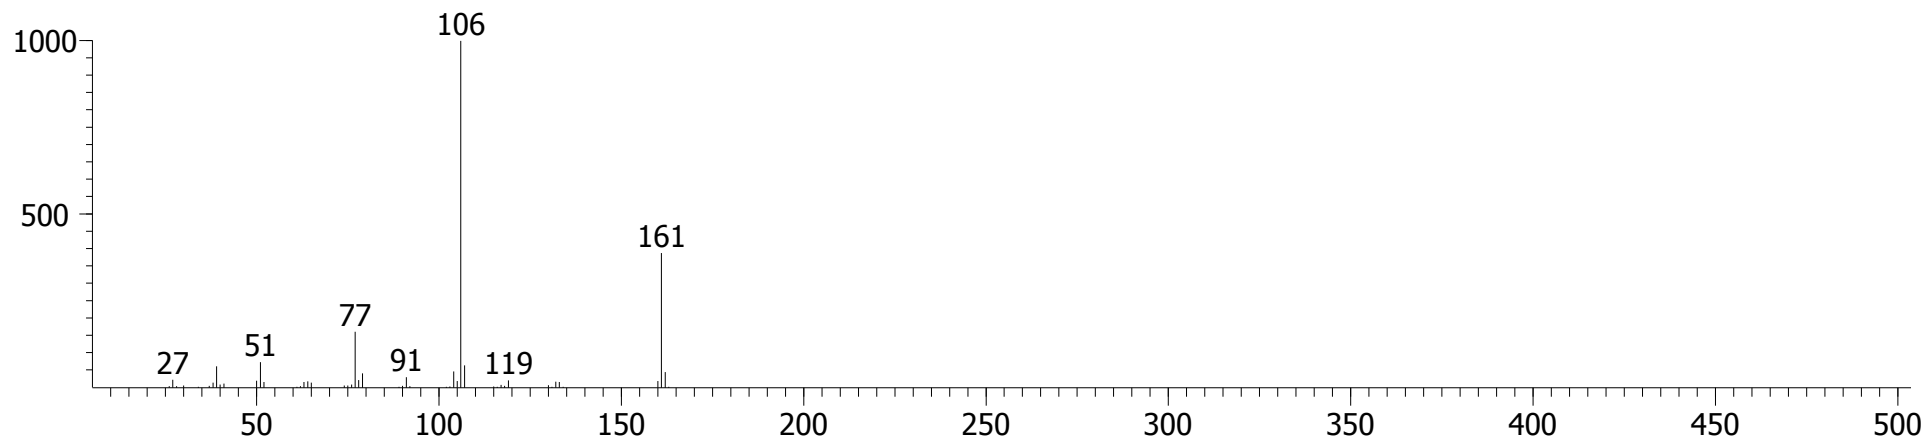

Sample 2, Fraction 1 (Hexane/DCM)

**Benzoic acid (two isomers detected)**

CAS # = 65-85-0  
1st Dimension R.T. = 1191.16  
2nd Dimension R.T. = 0.739  
Quant Mass(es) = 122  
S/N = 505.59  
Area = 27252  
Height = 5650.1



Peak True - sample "Lipid BM 2 F1:1", peak 1367, at 1191.16 , 0.739 sec , sec (Spec # 89682)

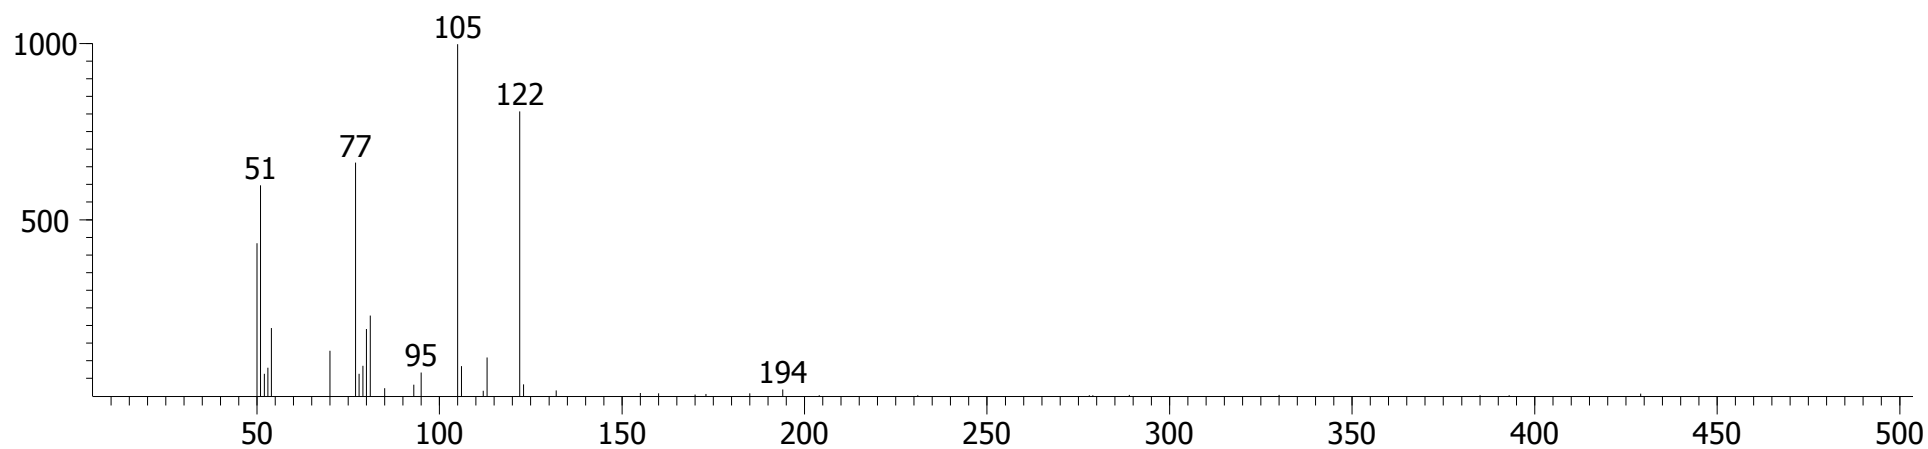

Library Hit - similarity 735, "Benzoic acid"



Sample 2, Fraction 1 (Hexane/DCM)

Benzyl butyl phthalate

CAS # = 85-68-7  
1st Dimension R.T. = 1495.49  
2nd Dimension R.T. = 1.241  
Quant Mass(es) = 206  
S/N = 1756.5  
Area = 93272  
Height = 6747.3

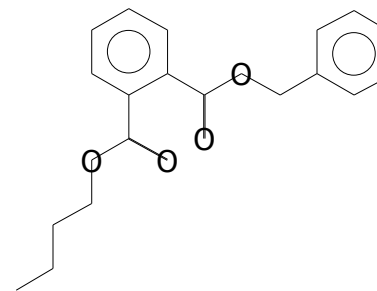

Peak True - sample "Lipid BM 2 F1:1", peak 3236, at 1495.49 , 1.241 sec , sec (Spec # 135868)

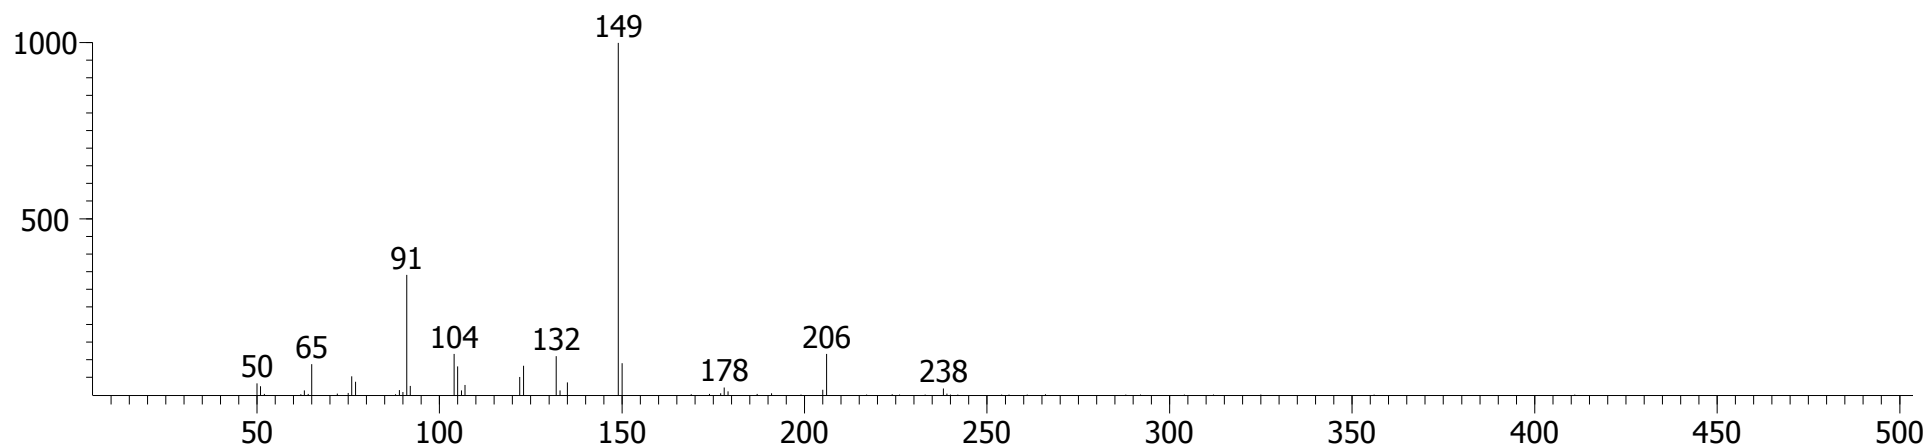

Library Hit - similarity 926, "Benzyl butyl phthalate"



Sample 2, Fraction 1 (Hexane/DCM)

Dibromophenyl ether

(BDE-47)

CAS # = 5436-43-1  
1st Dimension R.T. = 1582.94  
2nd Dimension R.T. = 1.472  
Quant Mass(es) = 486  
S/N = 57.905  
Area = 1029.1  
Height = 145.11

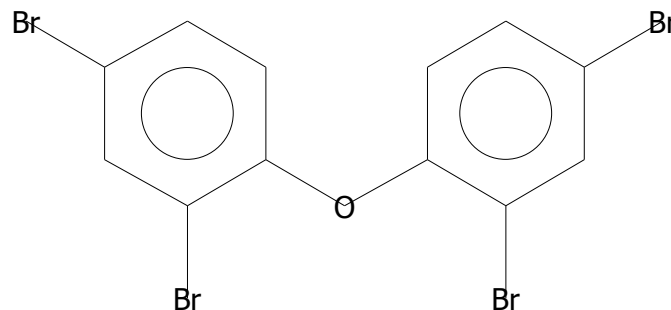

Peak True - sample "Lipid BM 2 F1:1", peak 3545, at 1582.94 , 1.472 sec , sec (Spec # 149153)

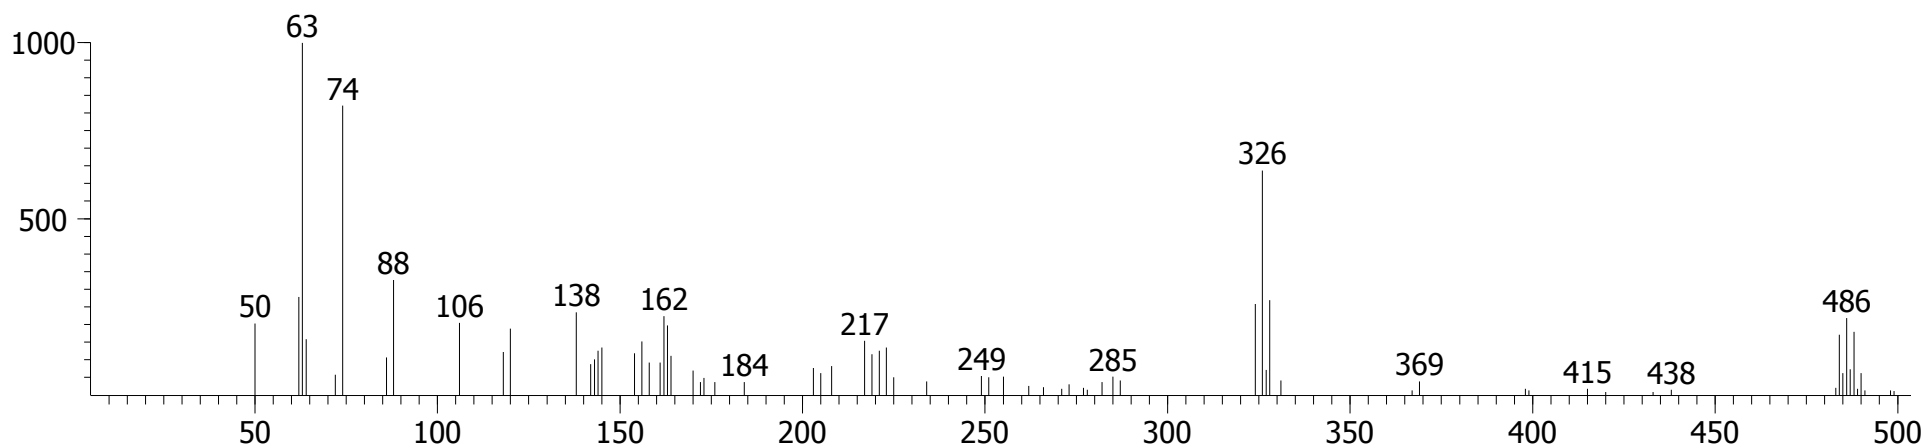

Library Hit - similarity 700, "Dibromophenyl ether"

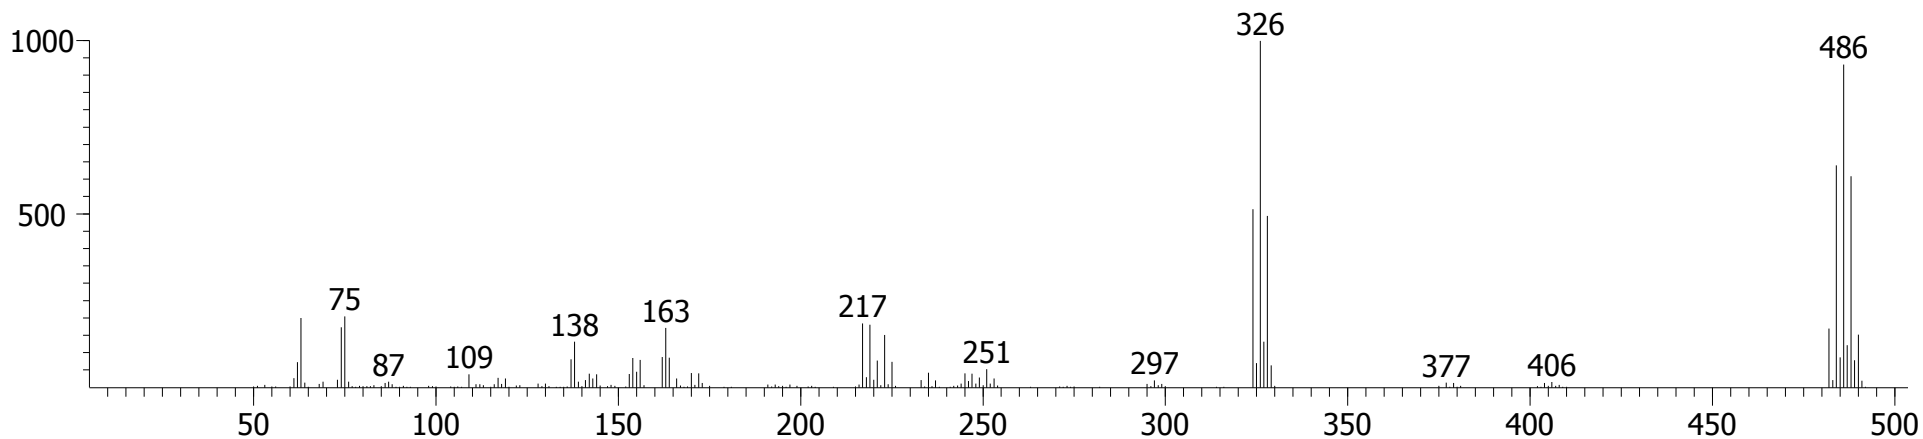

Sample 2, Fraction 1 (Hexane/DCM)

3-Chloro-2,6-dimethylpyridine

CAS # = 2405-06-3  
1st Dimension R.T. = 1831.3  
2nd Dimension R.T. = 1.492  
Quant Mass(es) = 141  
S/N = 272.44  
Area = 50743  
Height = 3804.8



Peak True - sample "Lipid BM 2 F1:1", peak 4286, at 1831.3 , 1.492 sec , sec (Spec # 186786)

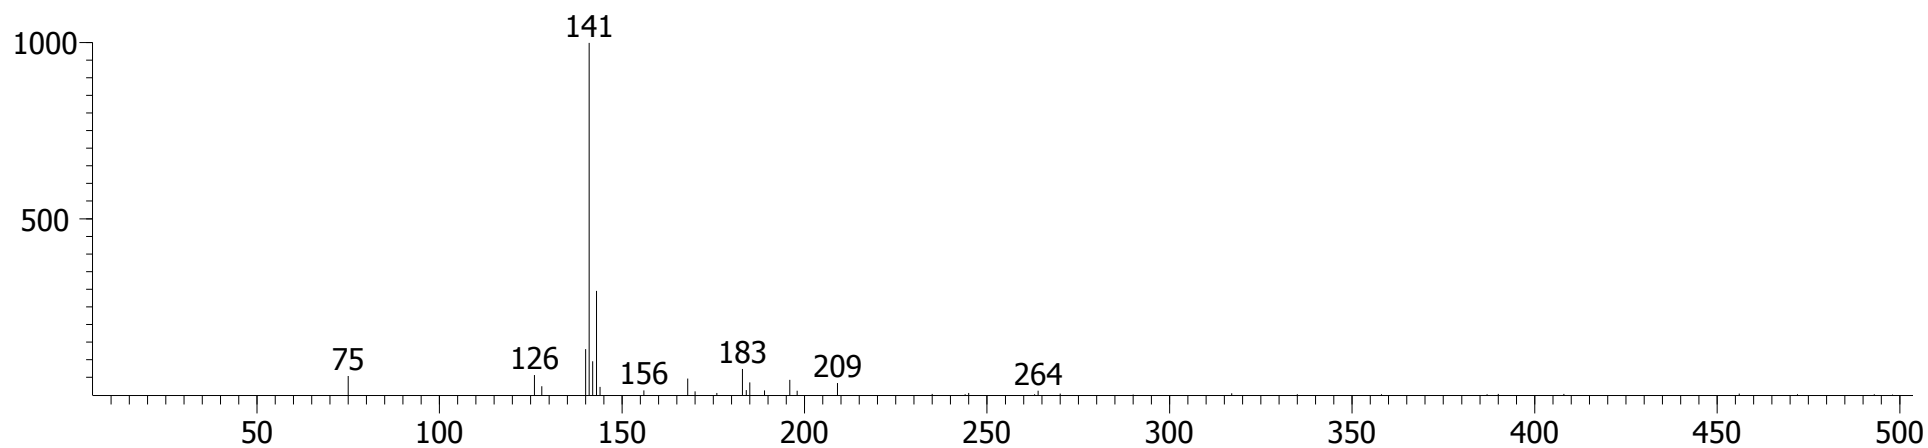

Library Hit - similarity 791, "3-Chloro-2,6-dimethylpyridine"

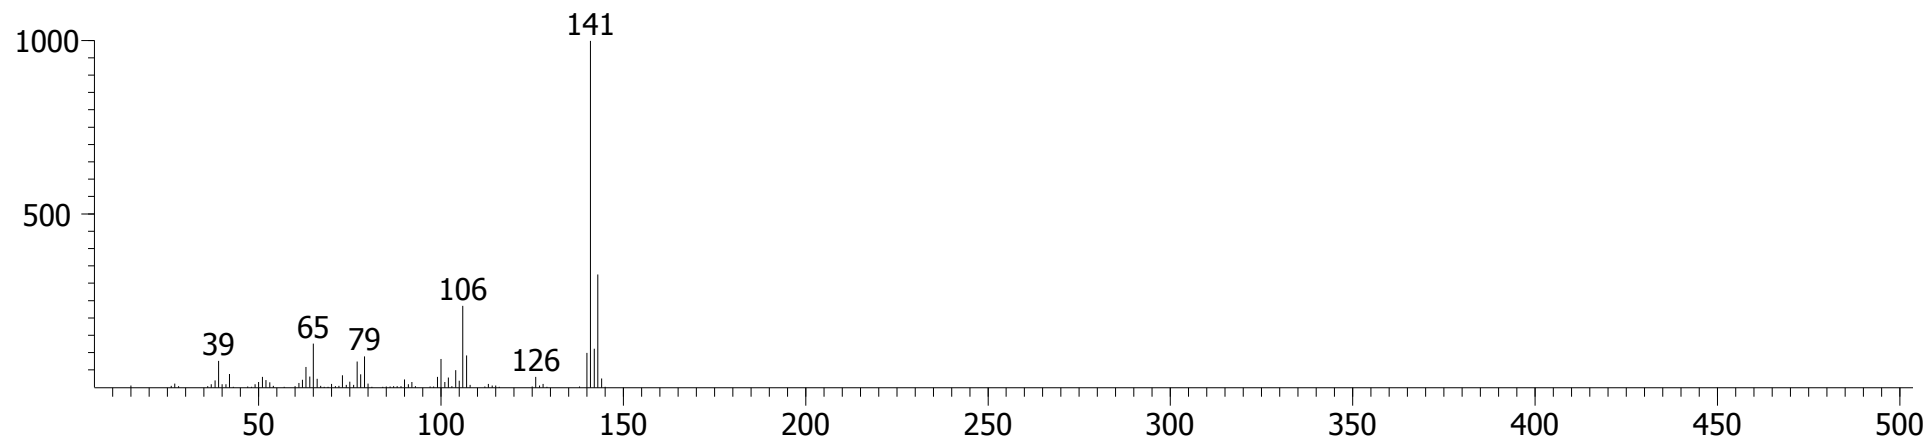



Sample 2, Fraction 2 (DCM)

Naphthalene,

1,2,3,4-tetrahydro-5-methyl-

CAS # = 2809-64-5

1st Dimension R.T. = 806.382

2nd Dimension R.T. = 0.931

Quant Mass(es) = 146

S/N = 202.86

Area = 8974.1

Height = 1561.0



(5-Methyltetralin)

Peak True - sample "Lipid BM 2 F2:1", peak 459, at 806.382 , 0.931 sec , sec (Spec # 31411)

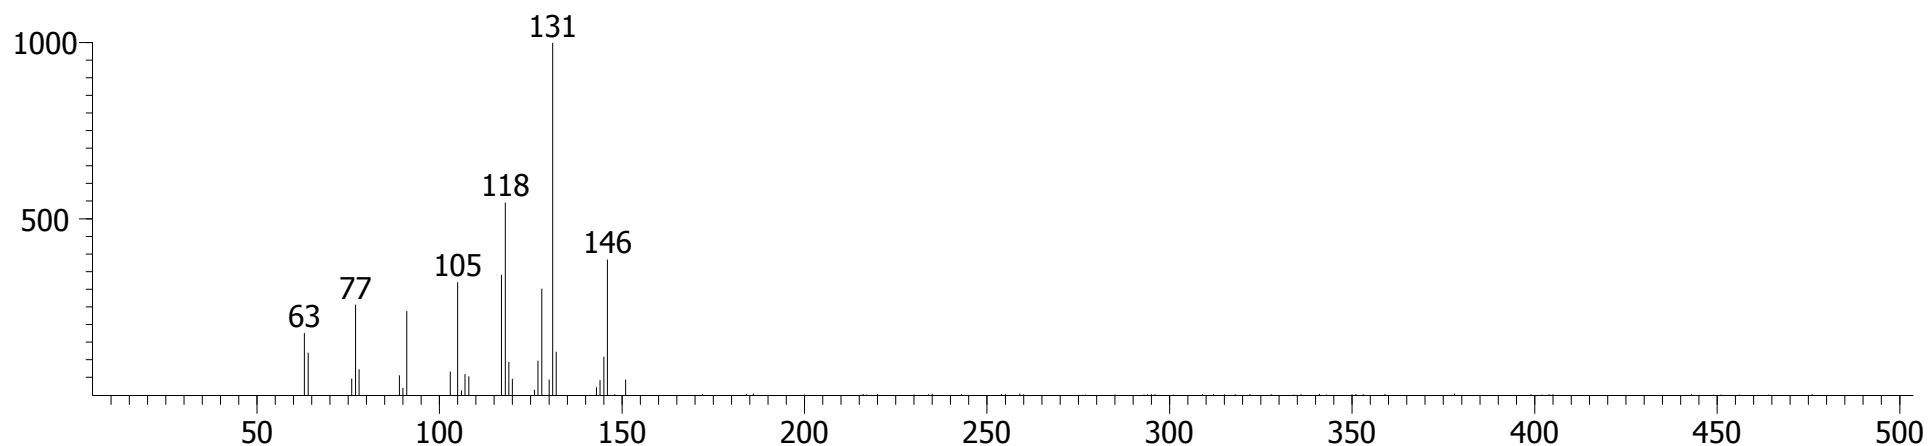

Library Hit - similarity 813, "Naphthalene, 1,2,3,4-tetrahydro-5-methyl-"



Sample 2, Fraction 2 (DCM)

1H-Inden-1-one, 2,3-dihydro-

CAS # = 83-33-0  
1st Dimension R.T. = 823.872  
2nd Dimension R.T. = 1.043  
Quant Mass(es) = 132  
S/N = 165.85  
Area = 12567  
Height = 2450.4

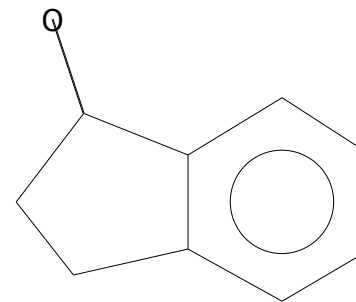

Peak True - sample "Lipid BM 2 F2:1", peak 508, at 823.872 , 1.043 sec , sec (Spec # 34078)

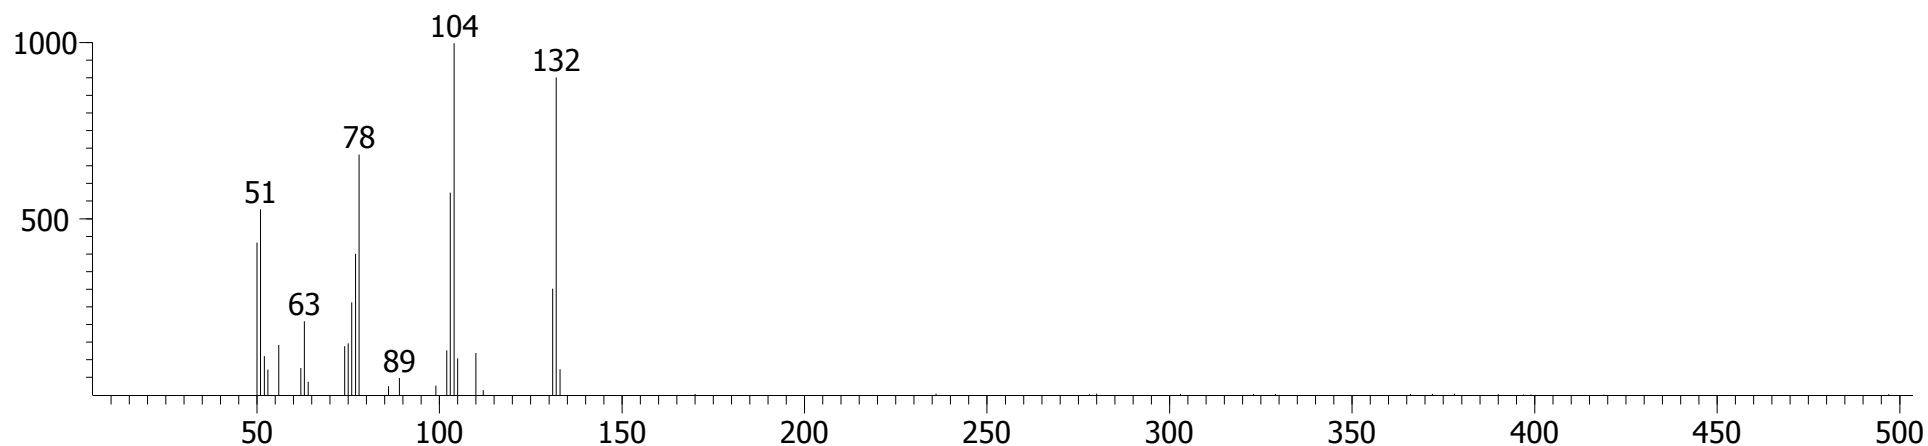

Library Hit - similarity 908, "1H-Inden-1-one, 2,3-dihydro-"

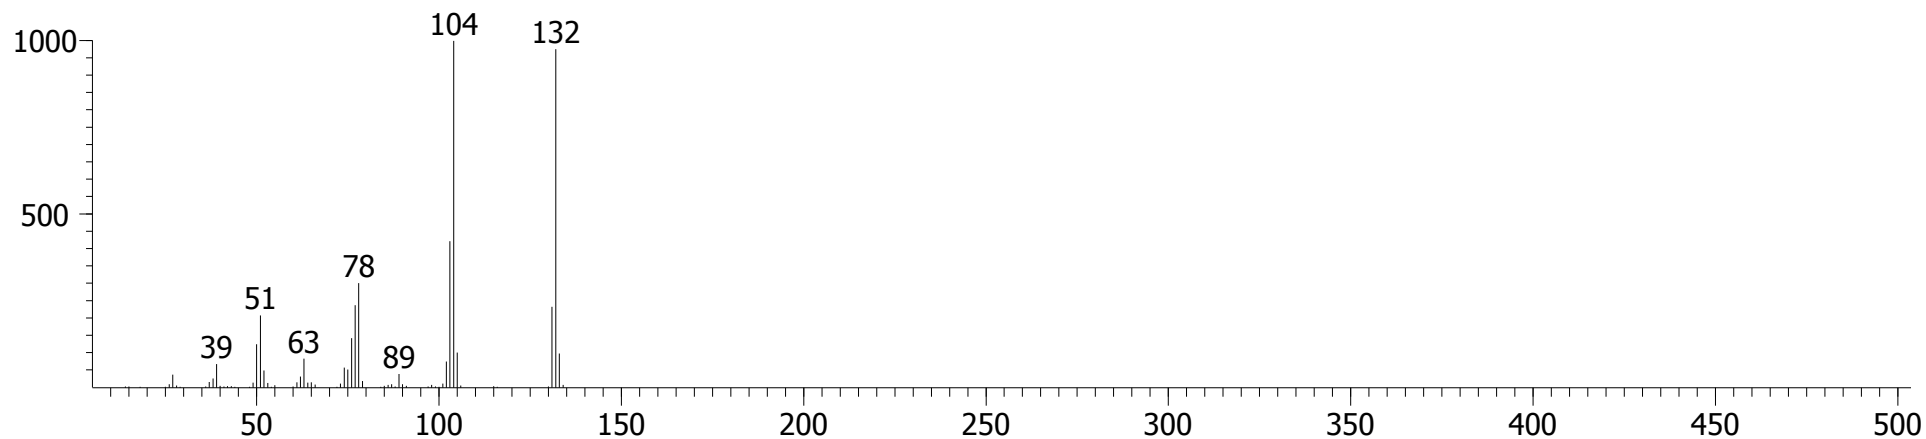

# Sample 2, Fraction 2 (DCM)

## Acetamide, N-(4-methylphenyl)-

CAS # = 103-89-9  
1st Dimension R.T. = 834.366  
2nd Dimension R.T. = 1.016  
Quant Mass(es) = 149  
S/N = 162.45  
Area = 4948.3  
Height = 782.94

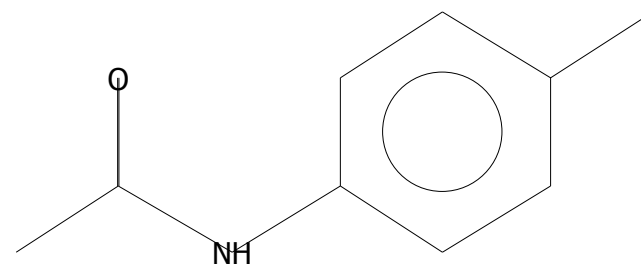

Peak True - sample "Lipid BM 2 F2:1", peak 533, at 834.366 , 1.016 sec , sec (Spec # 35664)

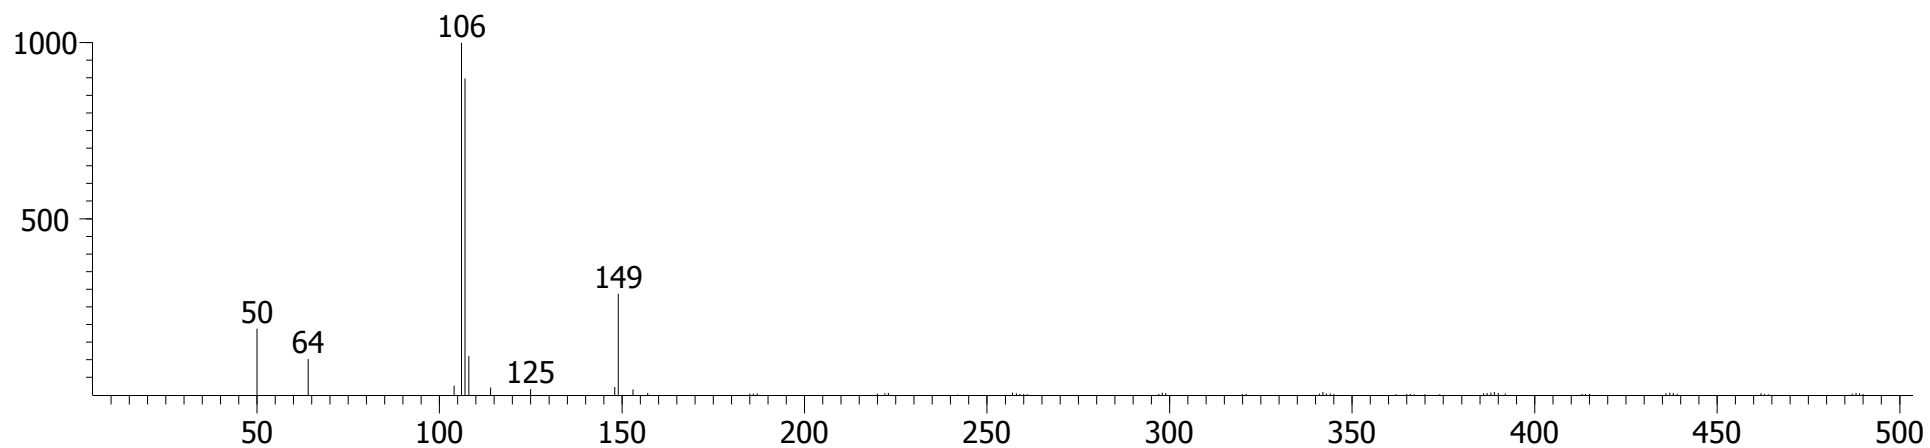

Library Hit - similarity 852, "Acetamide, N-(4-methylphenyl)-"

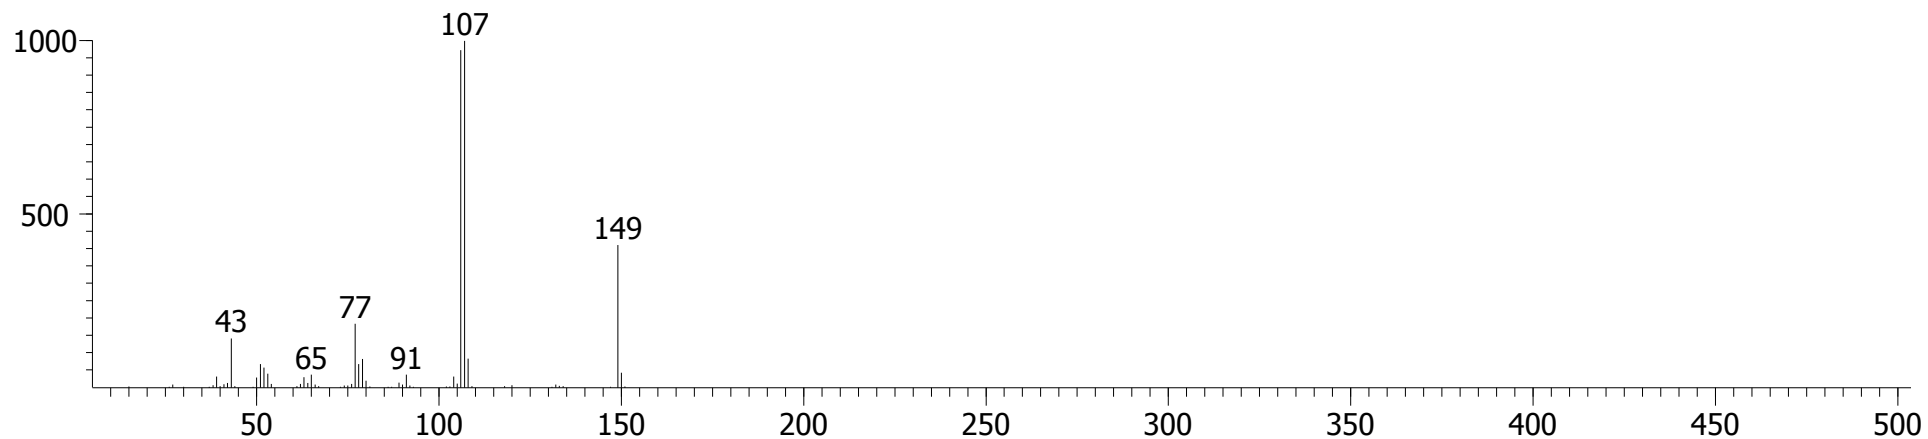

Sample 2, Fraction 2 (DCM)

3-Chloro-N,N-dimethylaniline

CAS # = 6848-13-1  
1st Dimension R.T. = 841.362  
2nd Dimension R.T. = 0.970  
Quant Mass(es) = 154  
S/N = 737.02  
Area = 43167  
Height = 8666.7

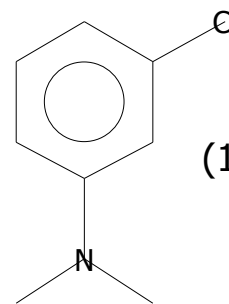

(1-Chloro-3-dimethylaminobenzene)

Peak True - sample "Lipid BM 2 F2:1", peak 544, at 841.362 , 0.970 sec , sec (Spec # 36717)

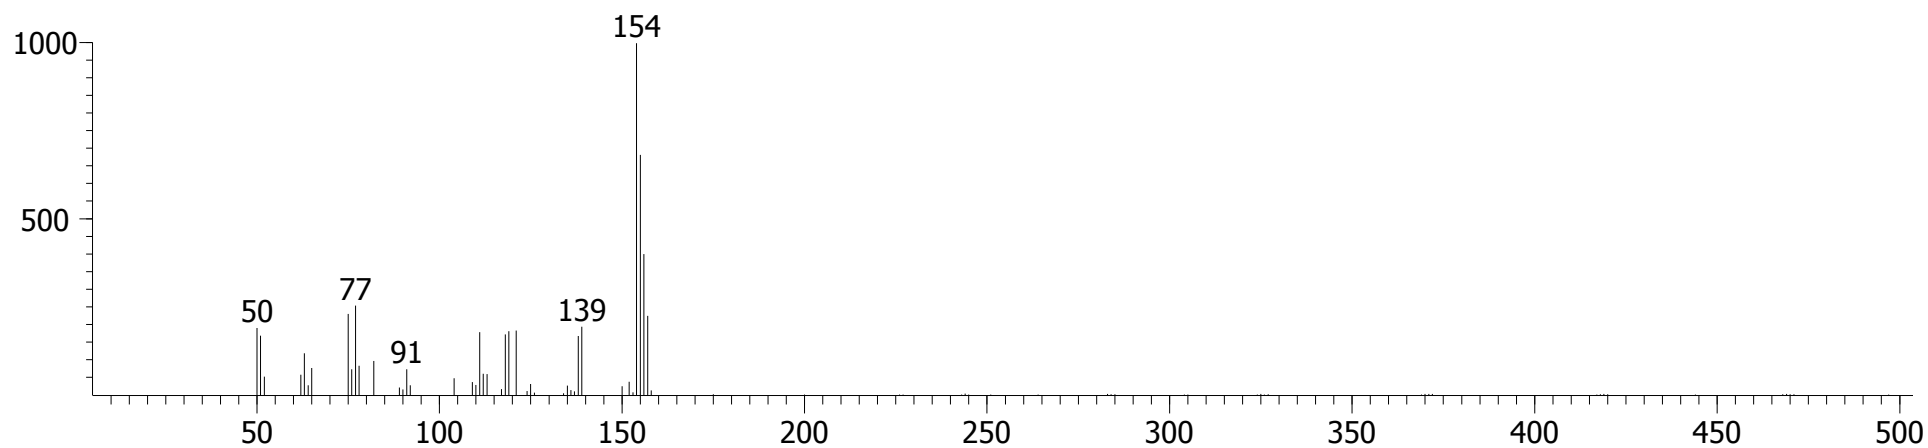

Library Hit - similarity 852, "3-Chloro-N,N-dimethylaniline"



Sample 2, Fraction 2 (DCM)

Benzenamine, 4-chloro-N-methyl-

CAS # = 932-96-7  
1st Dimension R.T. = 858.852  
2nd Dimension R.T. = 0.970  
Quant Mass(es) = 140  
S/N = 1391.8  
Area = 325219  
Height = 64994



(4-Chloro-N-methylaniline)

Peak True - sample "Lipid BM 2 F2:1", peak 579, at 858.852 , 0.970 sec , sec (Spec # 39367)

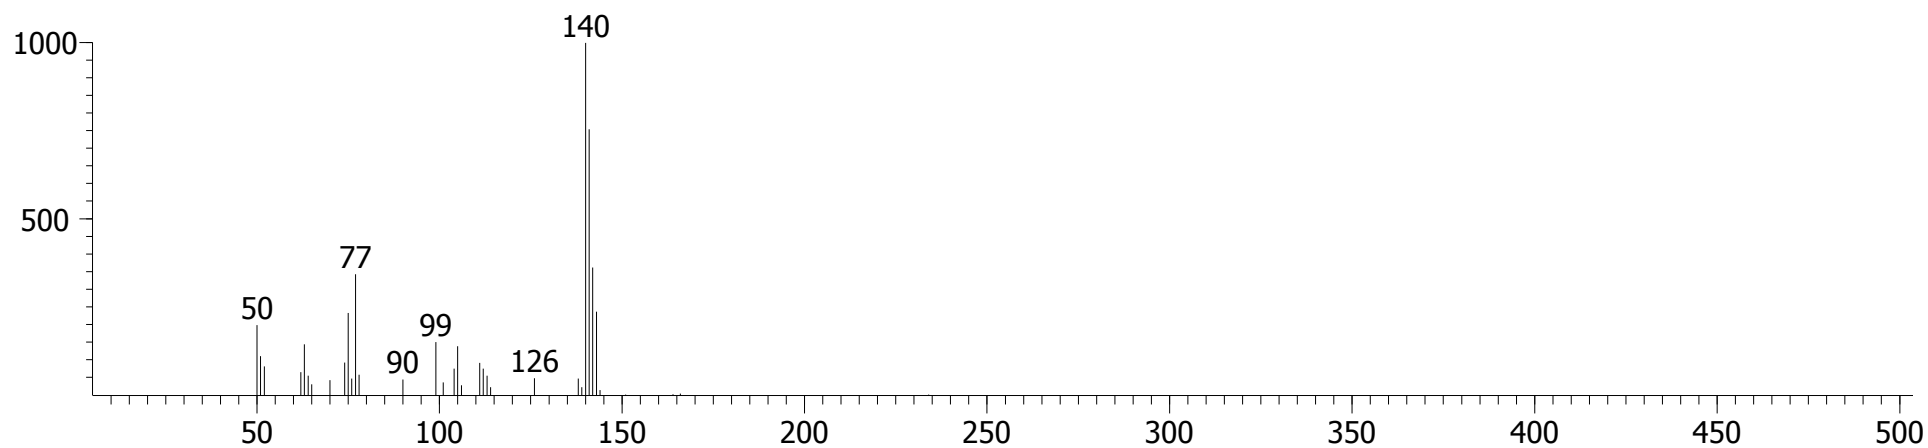

Library Hit - similarity 937, "Benzenamine, 4-chloro-N-methyl-"



Sample 2, Fraction 2 (DCM)

Benzene, heptyl-

CAS # = 1078-71-3  
1st Dimension R.T. = 872.844  
2nd Dimension R.T. = 0.884  
Quant Mass(es) = 176  
S/N = 4160.0  
Area = 49403  
Height = 10070

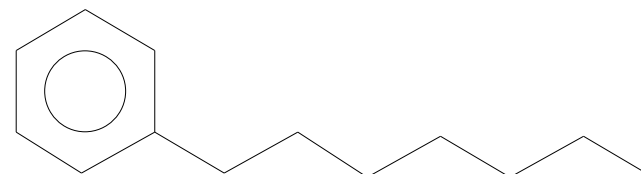

Peak True - sample "Lipid BM 2 F2:1", peak 605, at 872.844 , 0.884 sec , sec (Spec # 41474)

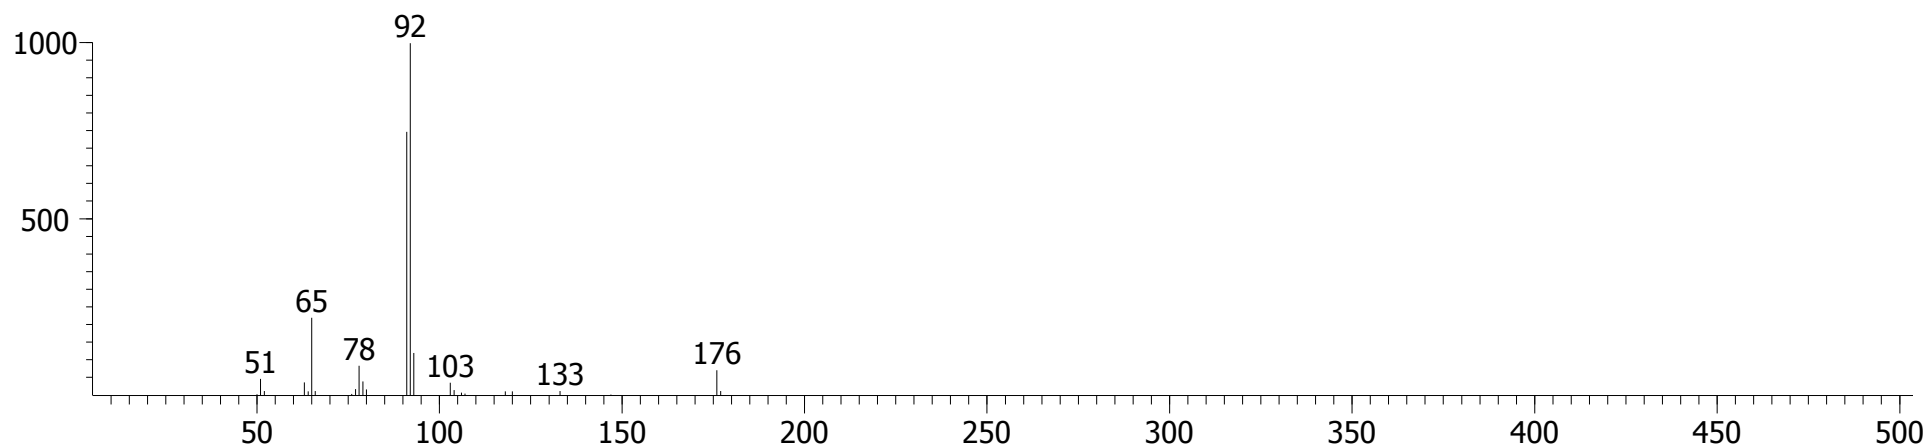

Library Hit - similarity 831, "Benzene, heptyl-"

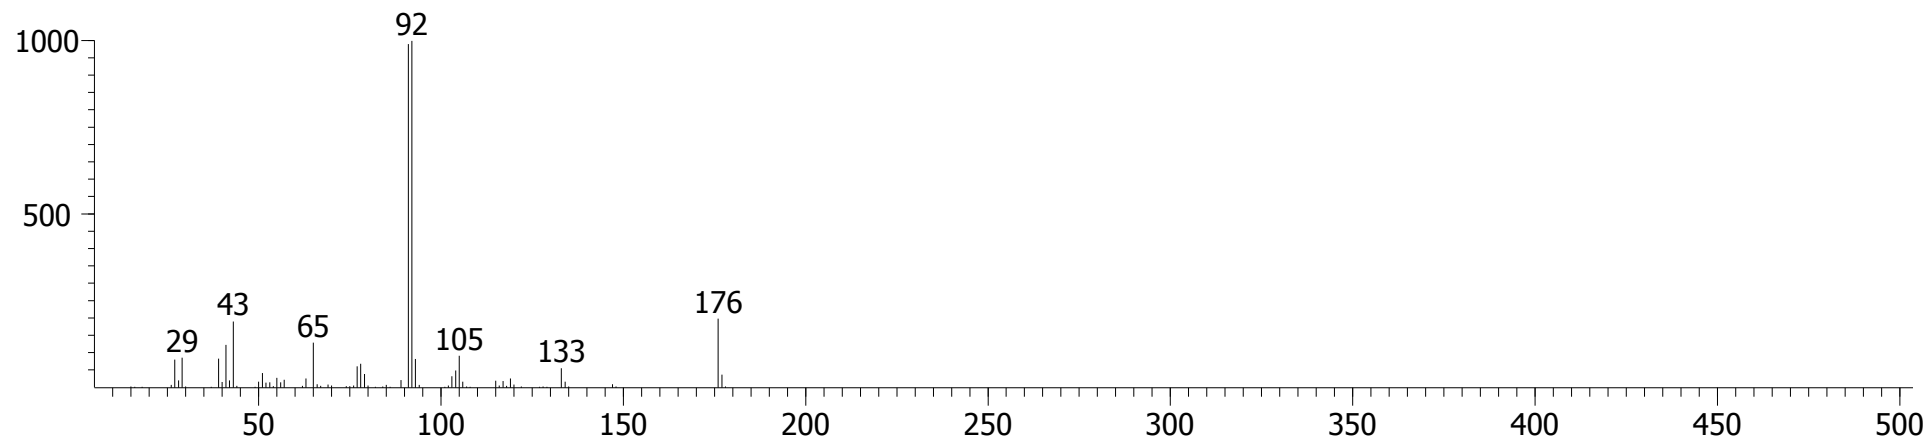

Sample 2, Fraction 2 (DCM)

Benzoic acid, 2-(hydroxymethyl)-

CAS # = 612-20-4  
1st Dimension R.T. = 879.84  
2nd Dimension R.T. = 1.102  
Quant Mass(es) = 134  
S/N = 362.61  
Area = 38641  
Height = 5263.3

(2-Hydroxymethylbenzoic acid)



Peak True - sample "Lipid BM 2 F2:1", peak 629, at 879.84 , 1.102 sec , sec (Spec # 42567)

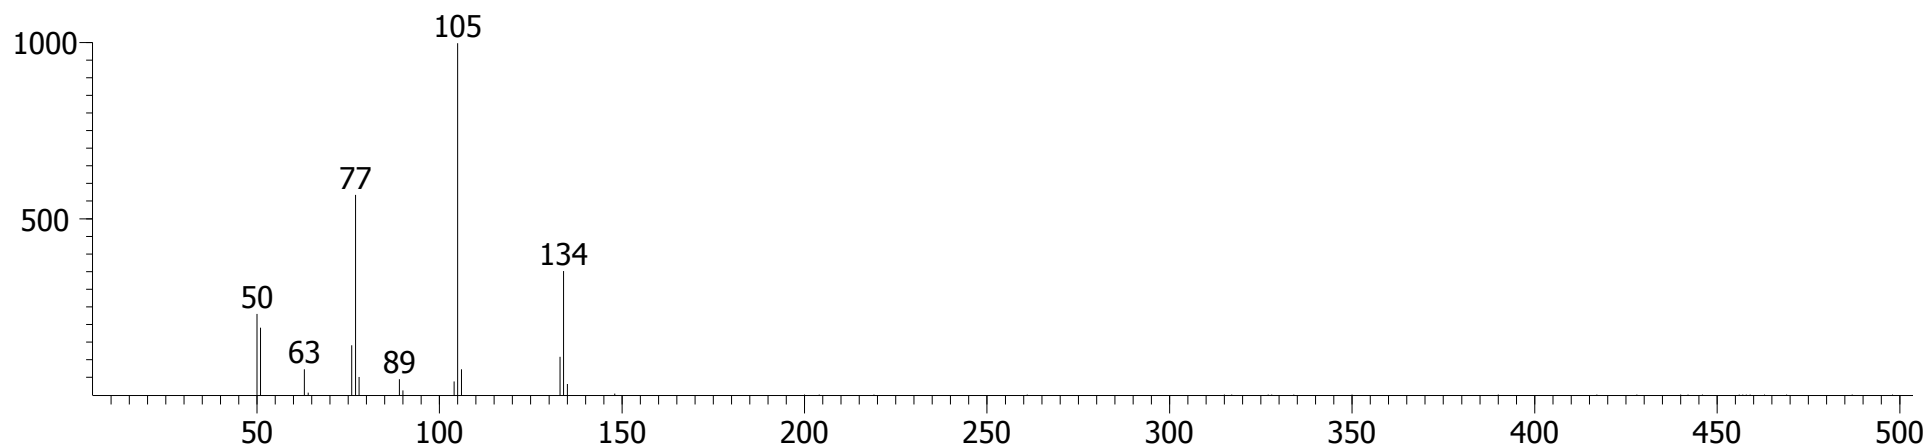

Library Hit - similarity 947, "Benzoic acid, 2-(hydroxymethyl)-"

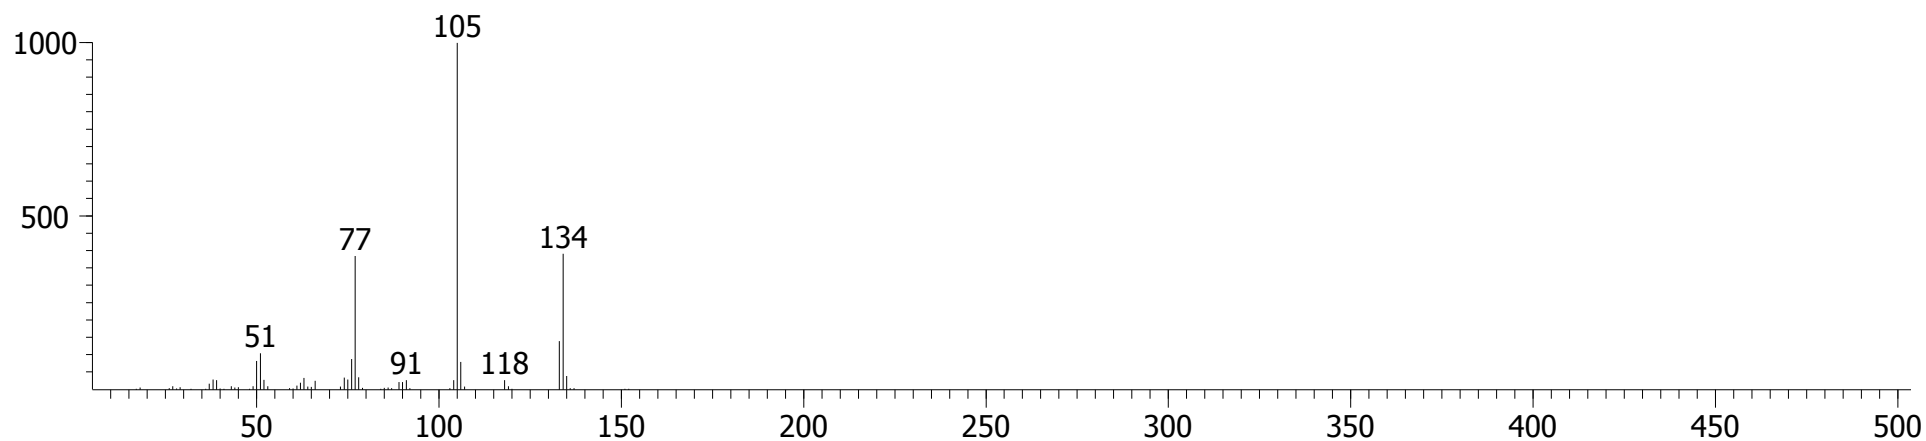

Sample 2, Fraction 2 (DCM)

Ethanone, 1,1'-(1,3-phenylene)bis-

CAS # = 6781-42-6  
1st Dimension R.T. = 935.808  
2nd Dimension R.T. = 1.049  
Quant Mass(es) = 162  
S/N = 1233.2  
Area = 117153  
Height = 15288

(1,3-Diacetylbenzene)

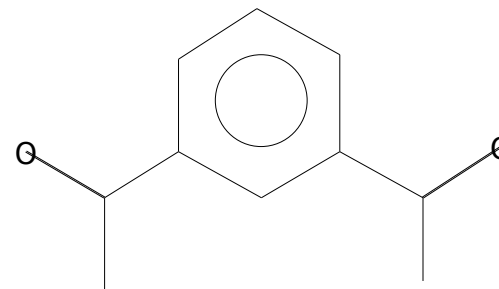

Peak True - sample "Lipid BM 2 F2:1", peak 775, at 935.808 , 1.049 sec , sec (Spec # 51039)

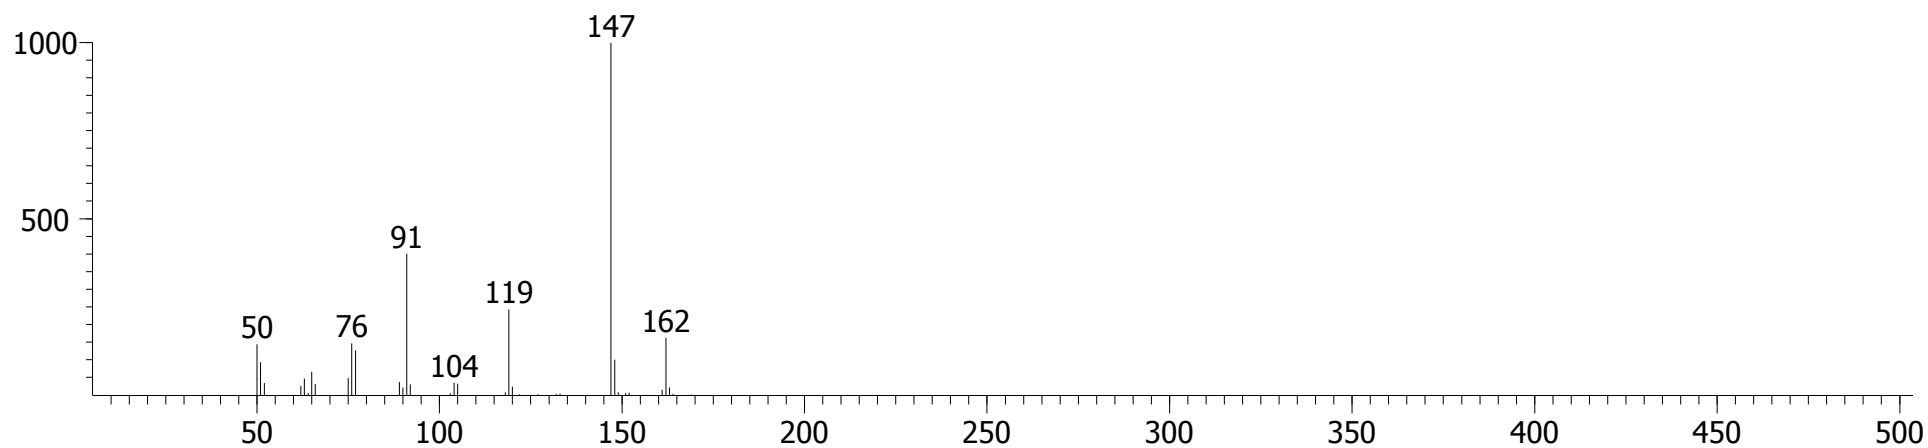

Library Hit - similarity 959, "Ethanone, 1,1'-(1,3-phenylene)bis-"





# Sample 2, Fraction 2 (DCM)

## Dimethyl phthalate

CAS # = 131-11-3  
1st Dimension R.T. = 946.302  
2nd Dimension R.T. = 1.043  
Quant Mass(es) = 163  
S/N = 229.47  
Area = 36391  
Height = 5887.4

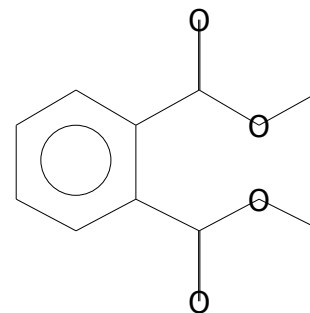

Peak True - sample "Lipid BM 2 F2:1", peak 804, at 946.302 , 1.043 sec , sec (Spec # 52628)

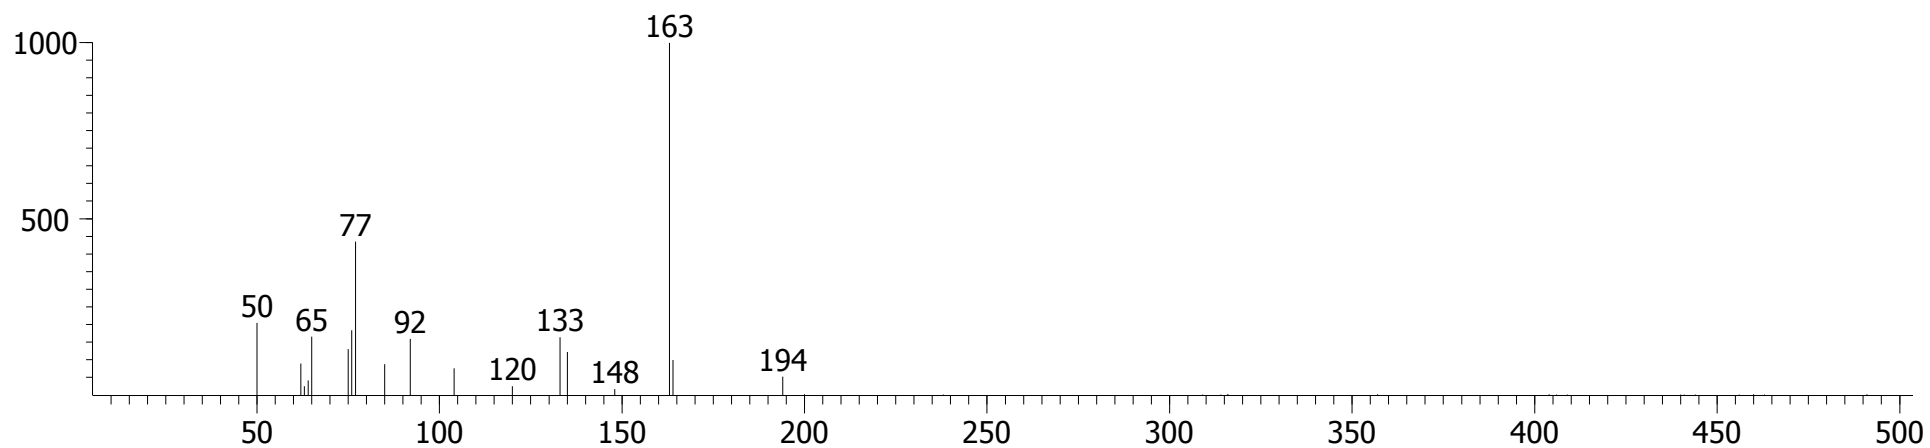

Library Hit - similarity 866, "Dimethyl phthalate"

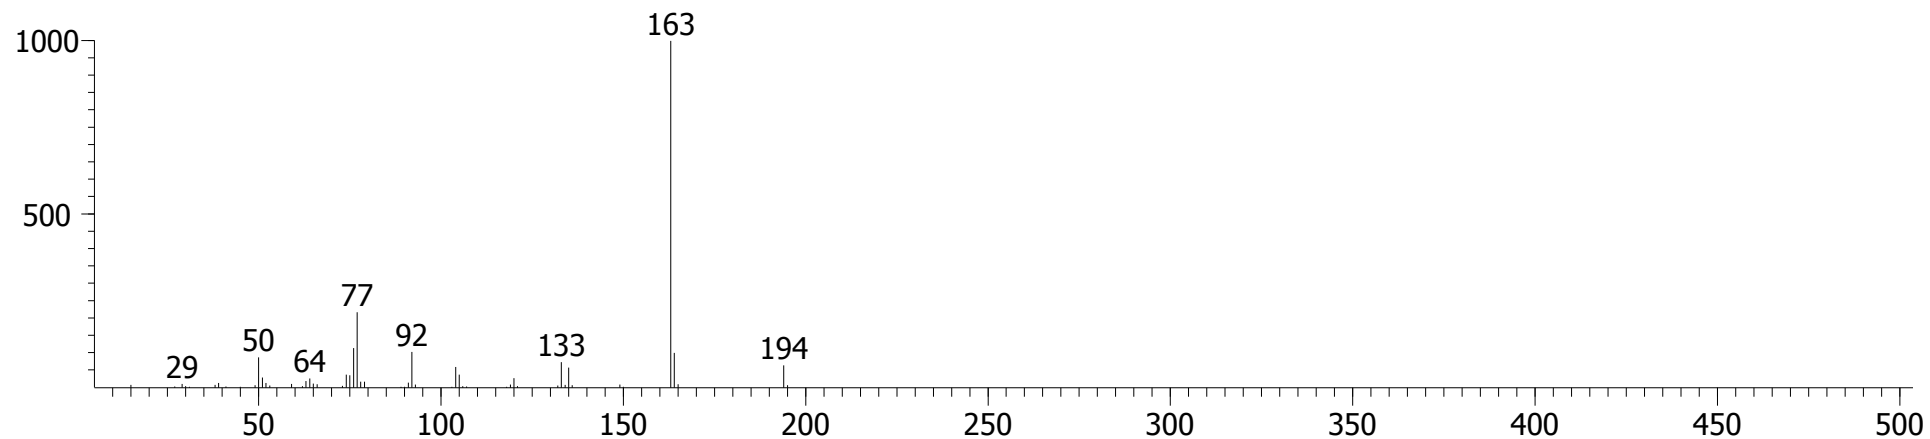

Sample 2, Fraction 2 (DCM)

Ethanone, 1,1'-(1,3-phenylene)bis-

(1,3-Diacetylbenzene)

CAS # = 6781-42-6  
1st Dimension R.T. = 949.8  
2nd Dimension R.T. = 1.030  
Quant Mass(es) = 162  
S/N = 247.07  
Area = 133306  
Height = 19647



Peak True - sample "Lipid BM 2 F2:1", peak 815, at 949.8 , 1.030 sec , sec (Spec # 53156)

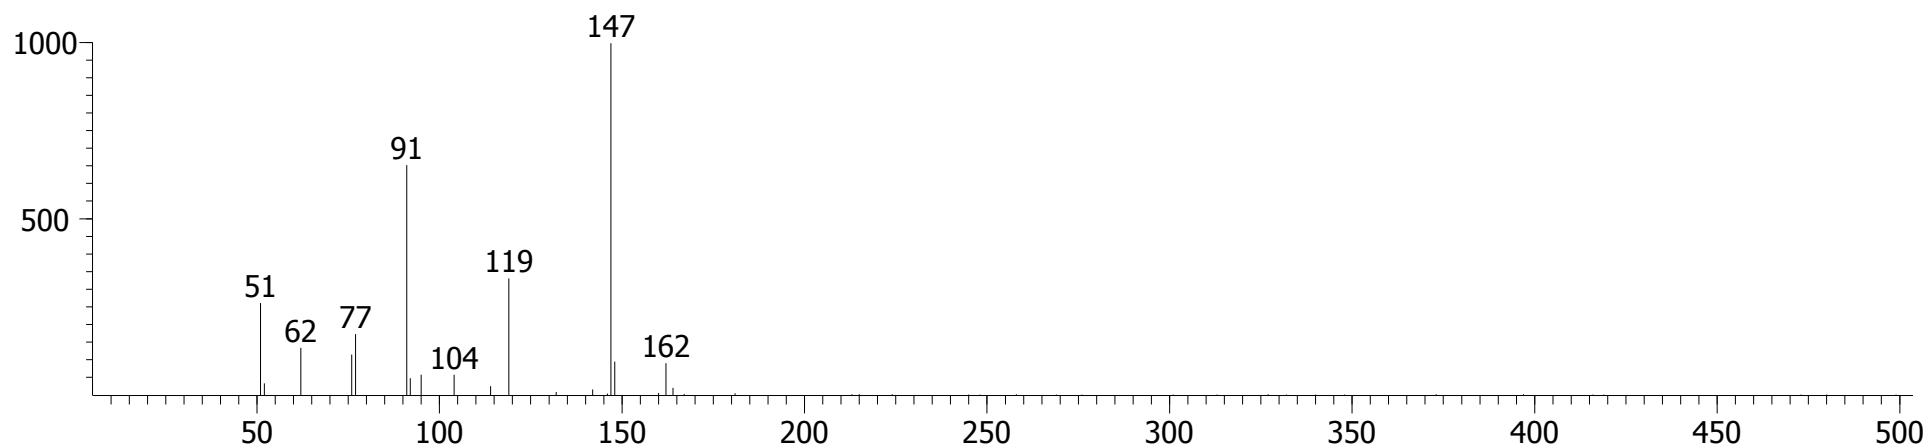

Library Hit - similarity 902, "Ethanone, 1,1'-(1,3-phenylene)bis-"



# Sample 2, Fraction 2 (DCM)

## Coumarin

CAS # = 91-64-5  
1st Dimension R.T. = 953.298  
2nd Dimension R.T. = 1.109  
Quant Mass(es) = 146  
S/N = 55.350  
Area = 3390.0  
Height = 587.06

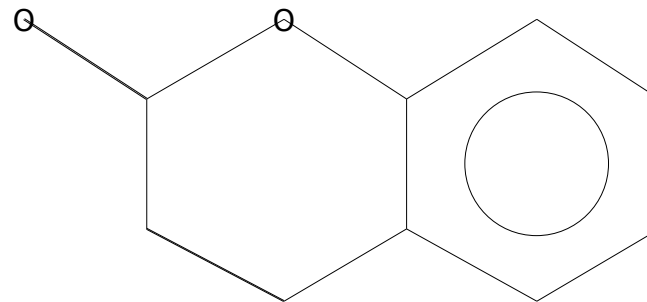

Peak True - sample "Lipid BM 2 F2:1", peak 825, at 953.298 , 1.109 sec , sec (Spec # 53698)

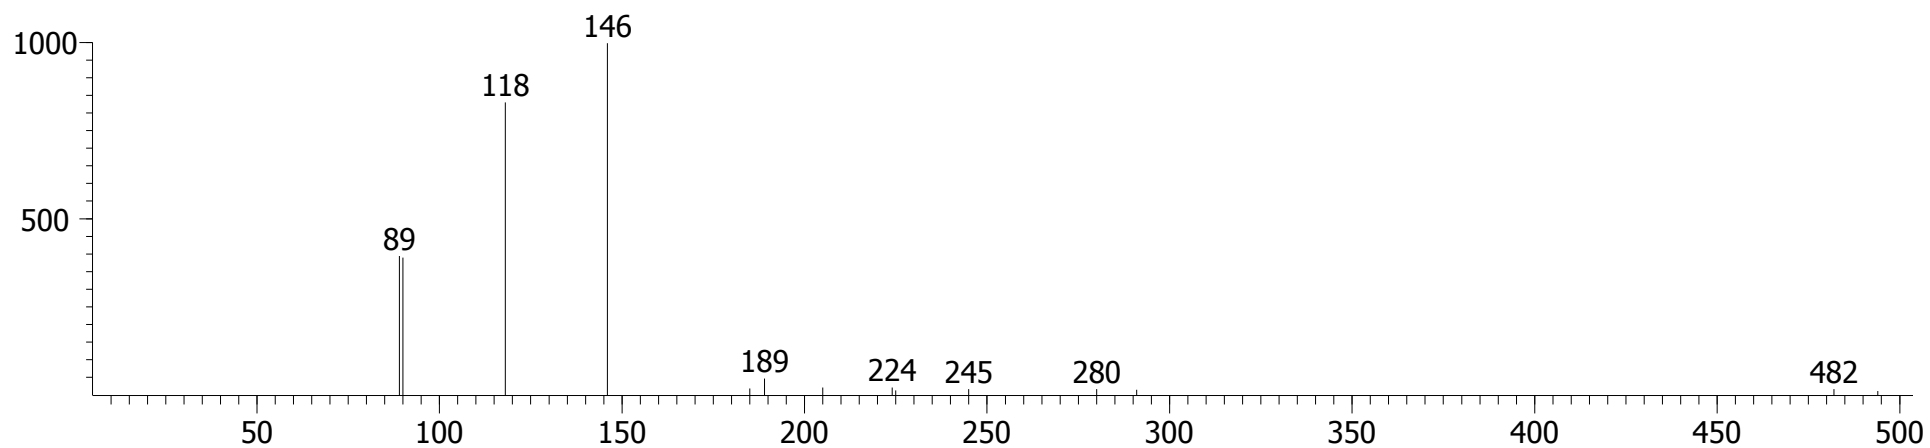

Library Hit - similarity 854, "Coumarin"

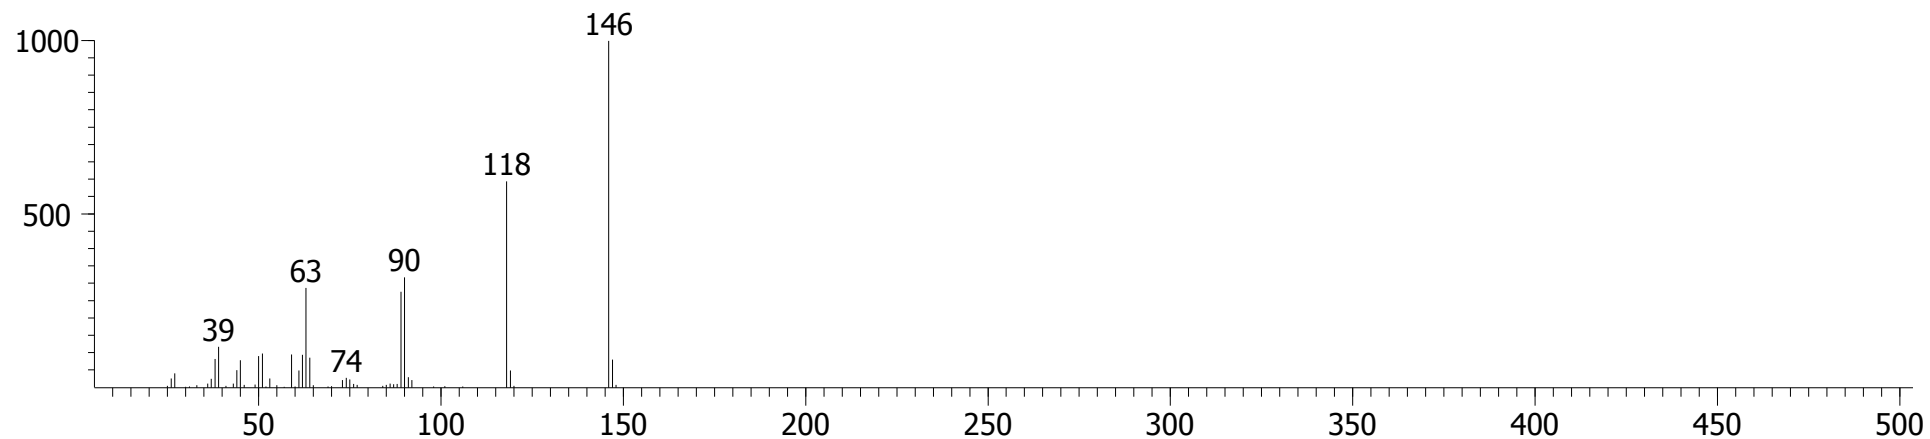

Sample 2, Fraction 2 (DCM)

Quinoline, 7-chloro-2-methyl-

CAS # = 4965-33-7  
1st Dimension R.T. = 967.29  
2nd Dimension R.T. = 1.010  
Quant Mass(es) = 177  
S/N = 56.391  
Area = 10456  
Height = 1492.5

(7-Chloroquinoline)

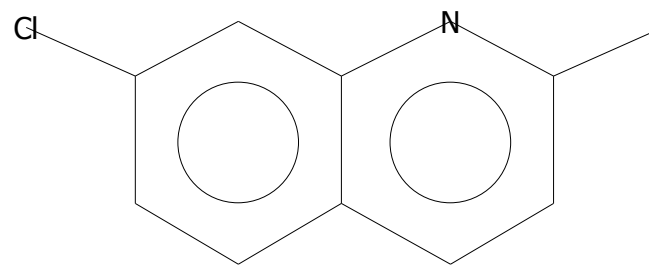

Peak True - sample "Lipid BM 2 F2:1", peak 868, at 967.29 , 1.010 sec , sec (Spec # 55803)

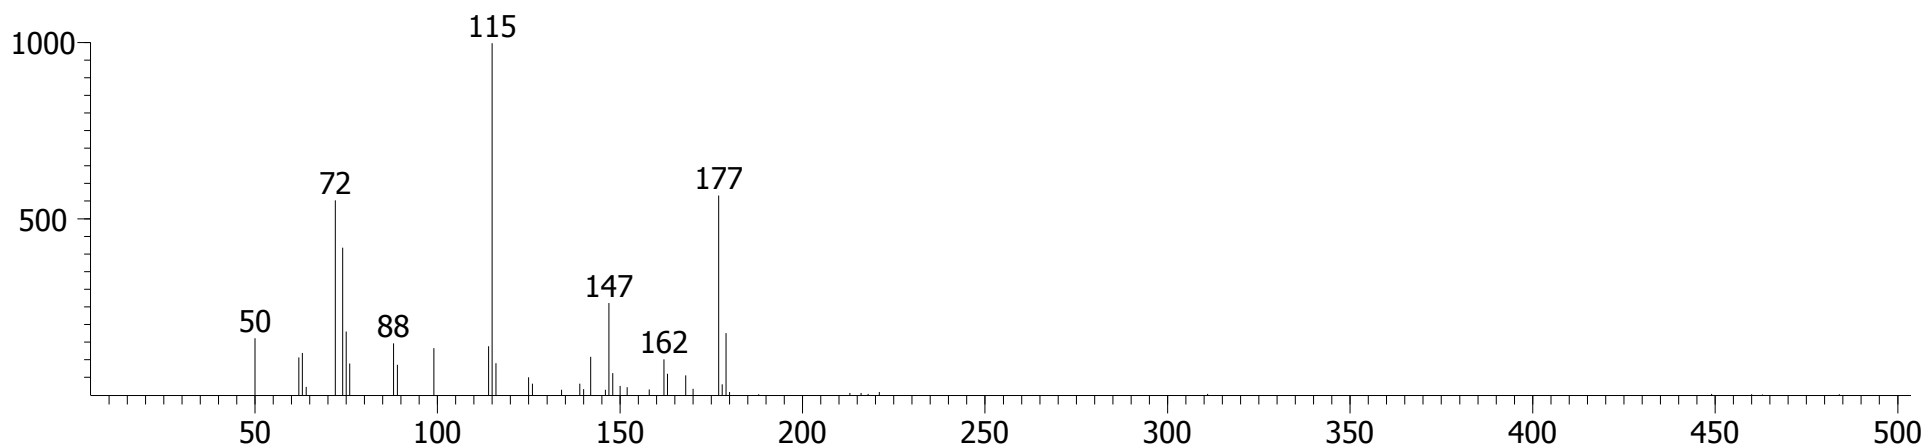

Library Hit - similarity 625, "Quinoline, 7-chloro-2-methyl-"

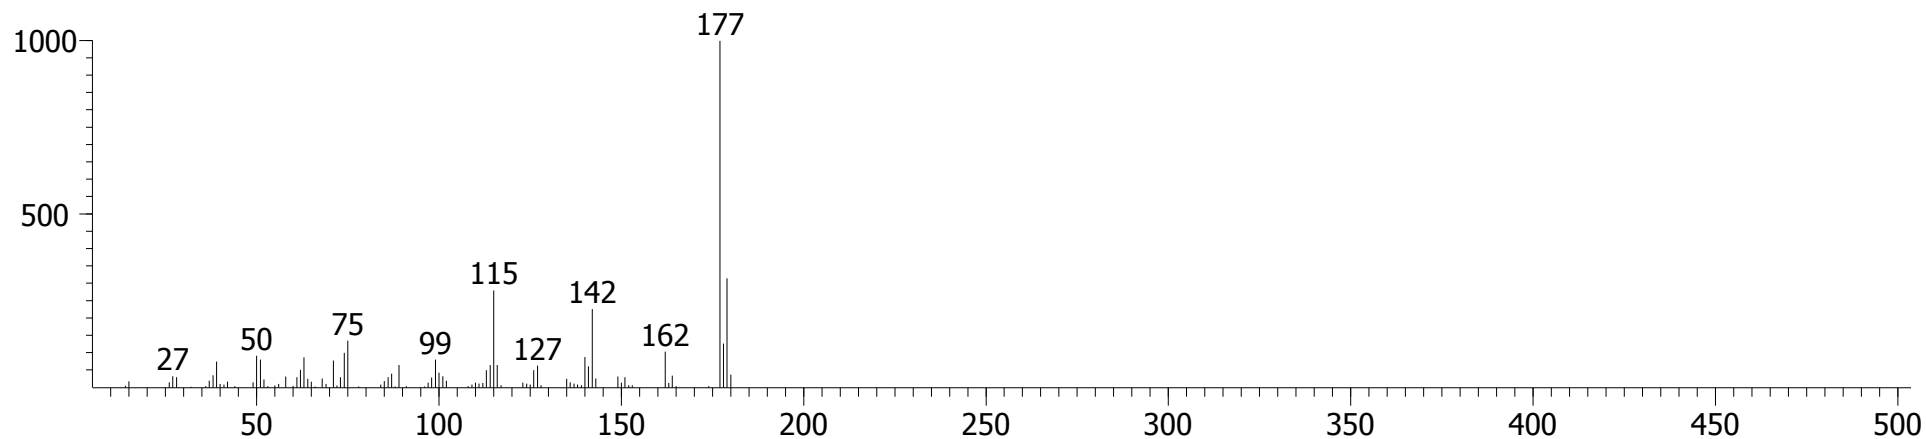

Sample 2, Fraction 2 (DCM)

1,1'-Biphenyl, 4-methyl-

(4-Methylbiphenyl)

CAS # = 644-08-6  
1st Dimension R.T. = 977.784  
2nd Dimension R.T. = 0.990  
Quant Mass(es) = 168  
S/N = 265.00  
Area = 13343  
Height = 2361.7

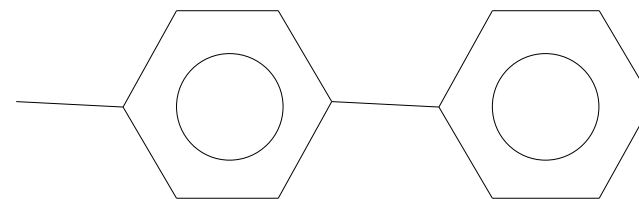

Peak True - sample "Lipid BM 2 F2:1", peak 901, at 977.784 , 0.990 sec , sec (Spec # 57390)

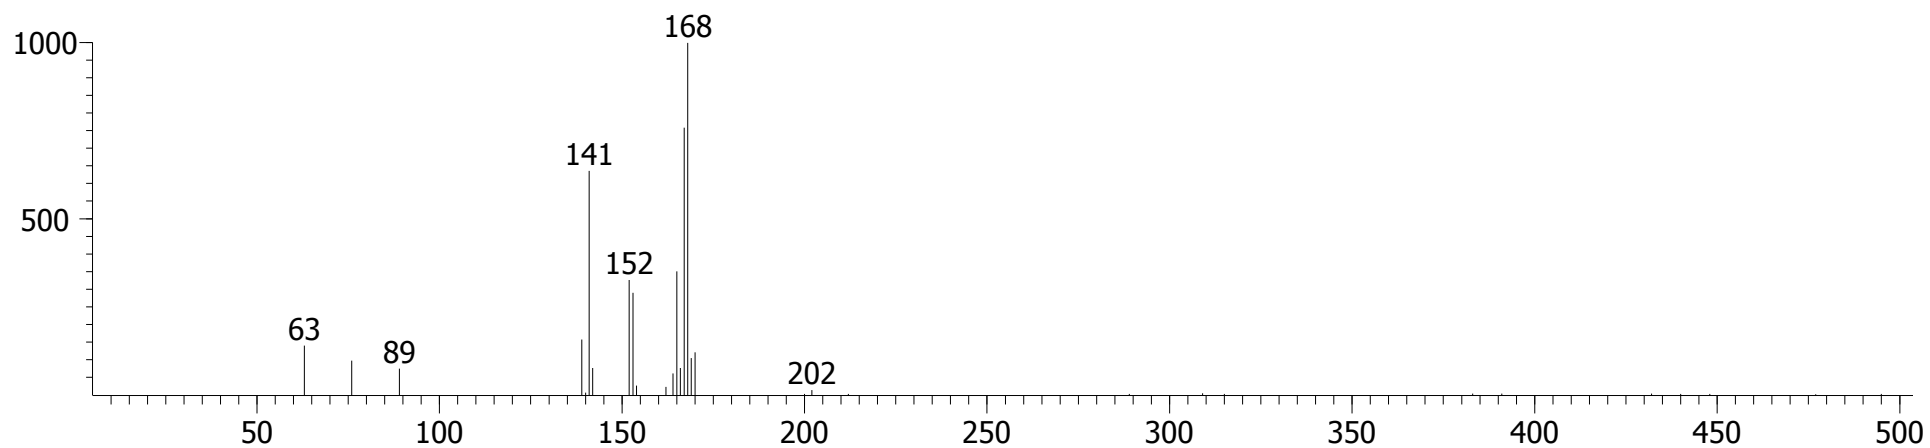

Library Hit - similarity 806, "1,1'-Biphenyl, 4-methyl-"

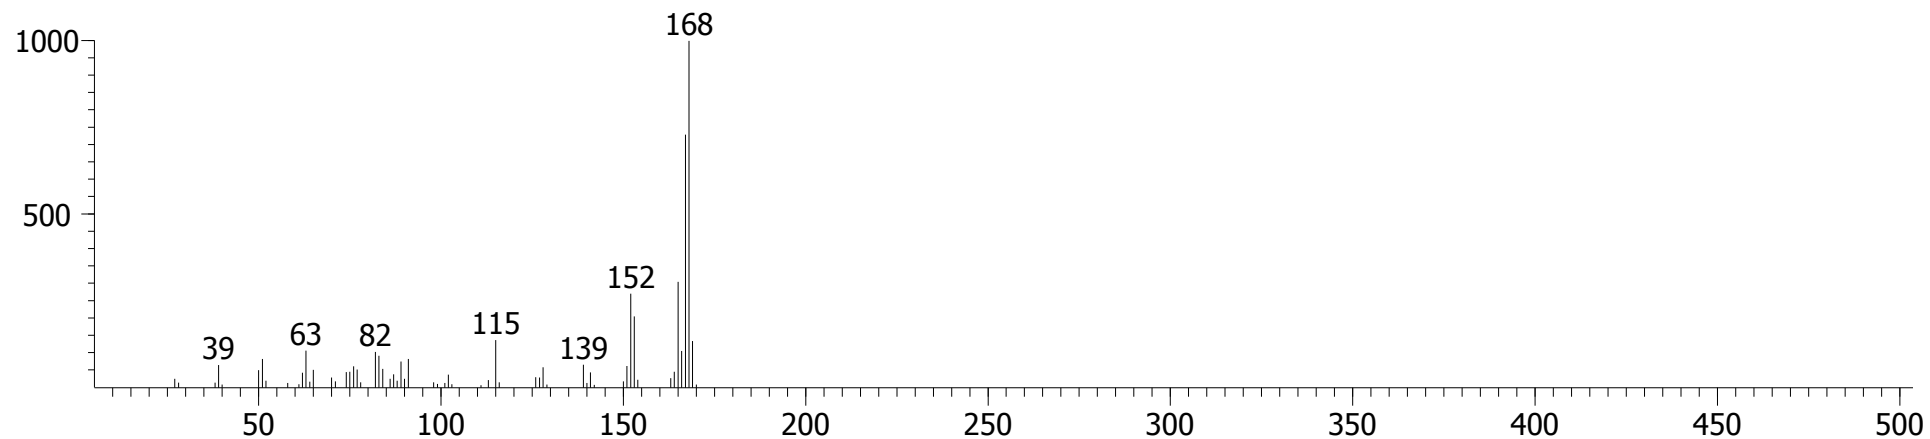

# Sample 2, Fraction 2 (DCM)

## Naphthalene, 1-propyl-

CAS # = 2765-18-6  
1st Dimension R.T. = 981.282  
2nd Dimension R.T. = 0.983  
Quant Mass(es) = 170  
S/N = 509.83  
Area = 7706.5  
Height = 1346.5

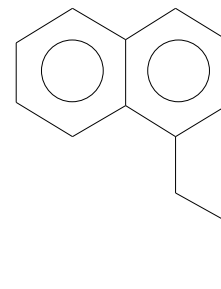

Peak True - sample "Lipid BM 2 F2:1", peak 909, at 981.282 , 0.983 sec , sec (Spec # 57919)

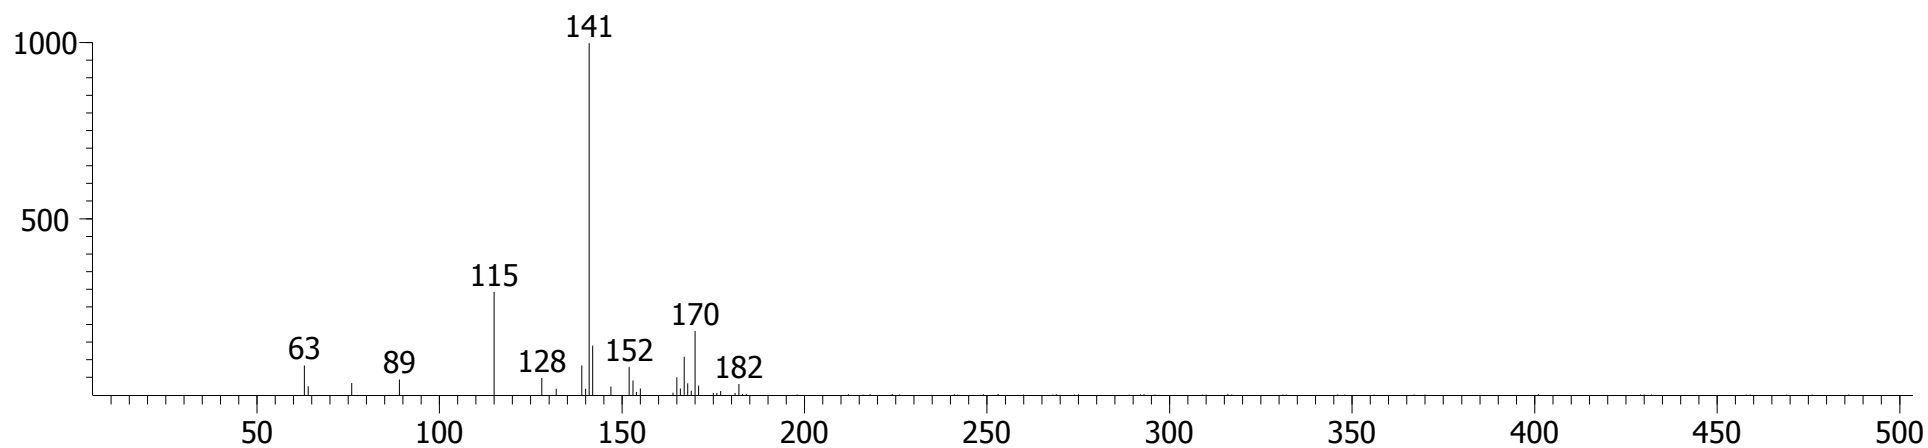

Library Hit - similarity 858, "Naphthalene, 1-propyl-"

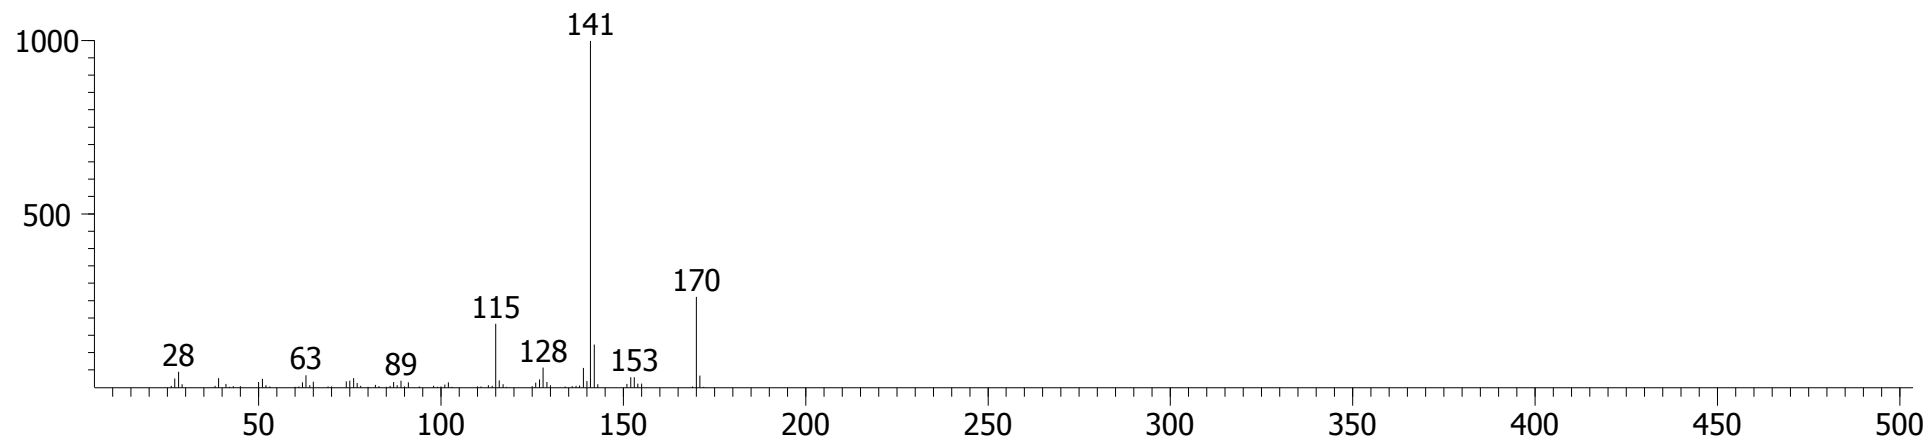

Sample 2, Fraction 2 (DCM)

o-Cyanobenzoic acid

CAS # = 3839-22-3  
1st Dimension R.T. = 981.282  
2nd Dimension R.T. = 1.102  
Quant Mass(es) = 147  
S/N = 181.56  
Area = 69400  
Height = 13722



(2-Cyanobenzoic acid)

Peak True - sample "Lipid BM 2 F2:1", peak 912, at 981.282 , 1.102 sec , sec (Spec # 57937)

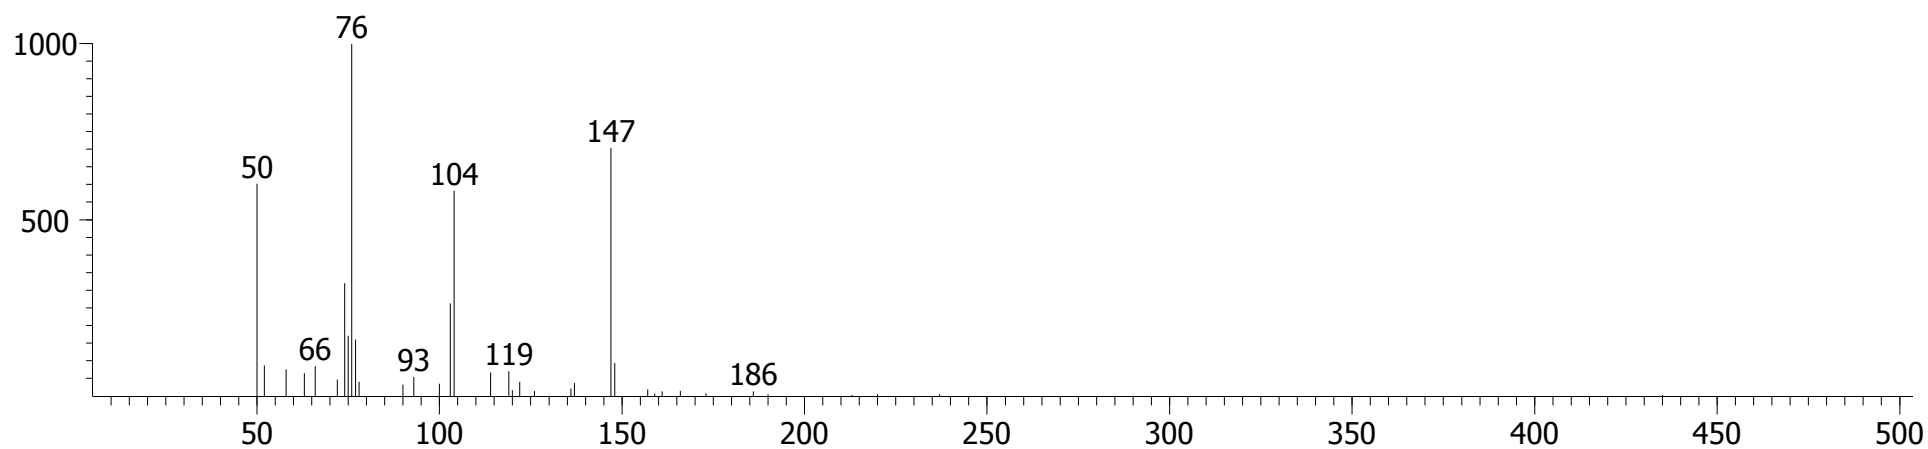

Library Hit - similarity 893, "o-Cyanobenzoic acid"

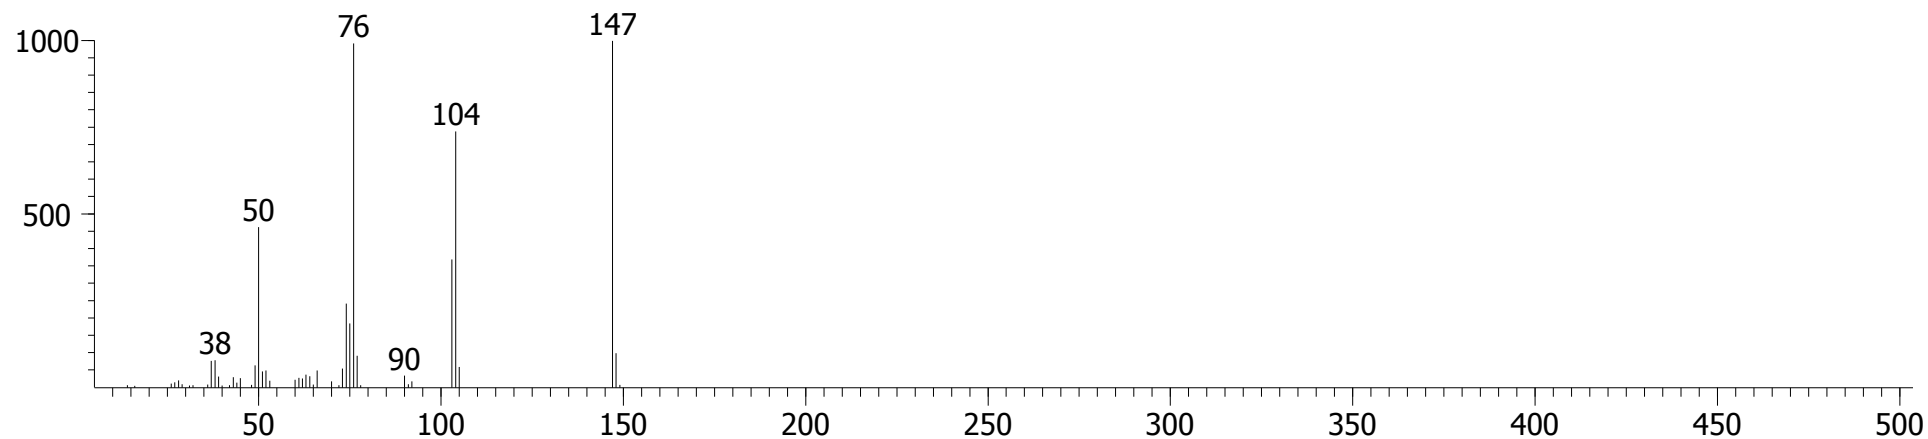

# Sample 2, Fraction 2 (DCM)

## Butylated Hydroxytoluene

CAS # = 128-37-0  
1st Dimension R.T. = 988.278  
2nd Dimension R.T. = 0.924  
Quant Mass(es) = 220  
S/N = 4932.3  
Area = 252816  
Height = 47936

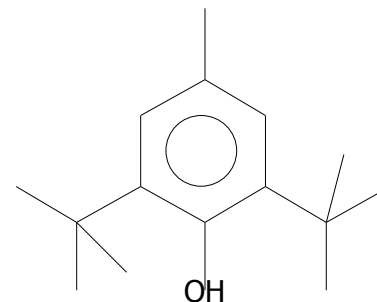

Peak True - sample "Lipid BM 2 F2:1", peak 929, at 988.278 , 0.924 sec , sec (Spec # 58970)

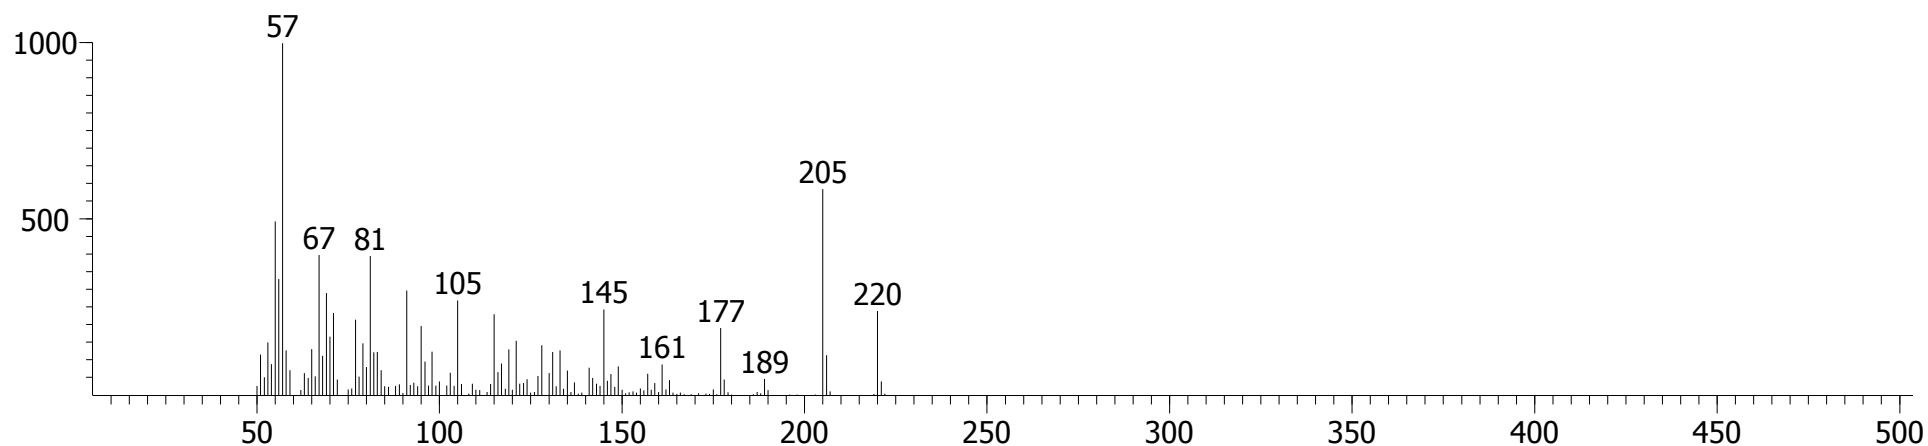

Library Hit - similarity 779, "Butylated Hydroxytoluene"

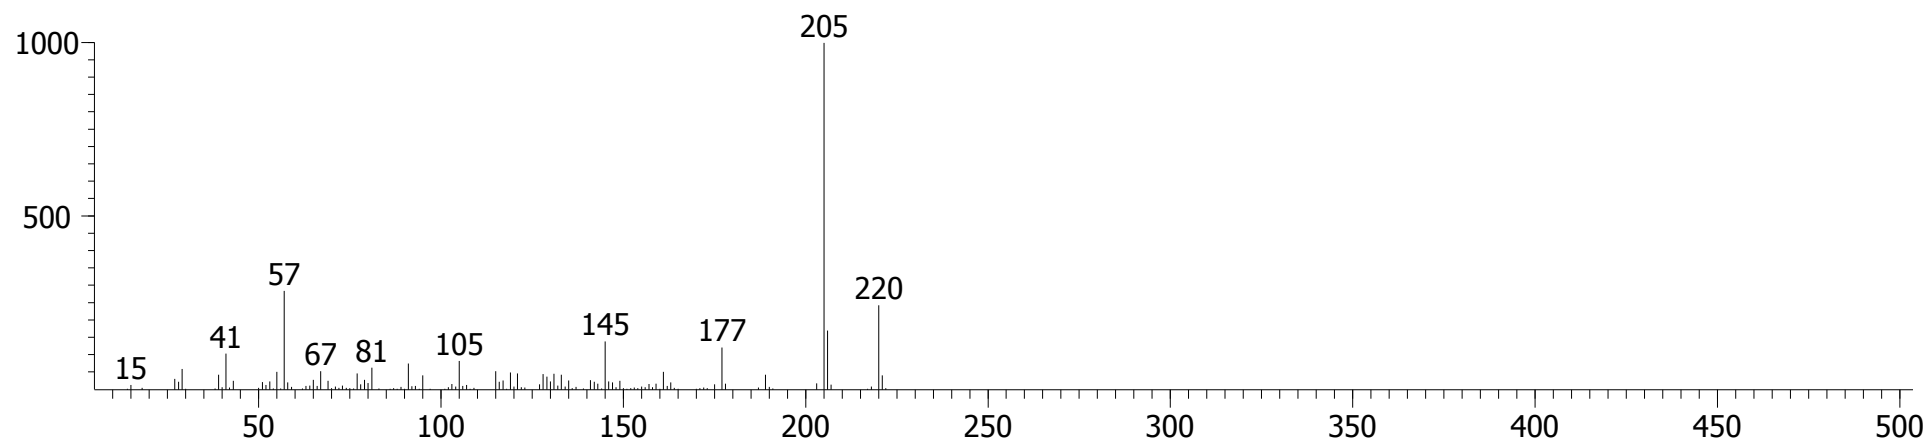



Sample 2, Fraction 2 (DCM)

Phenol, 2,4-bis(1,1-dimethylethyl)-

CAS # = 96-76-4  
1st Dimension R.T. = 991.776  
2nd Dimension R.T. = 0.924  
Quant Mass(es) = 206  
S/N = 407.00  
Area = 19966  
Height = 3105.6

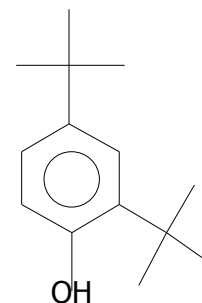

(2,4-Di-tert-butylphenol)

Peak True - sample "Lipid BM 2 F2:1", peak 943, at 991.776 , 0.924 sec , sec (Spec # 59500)

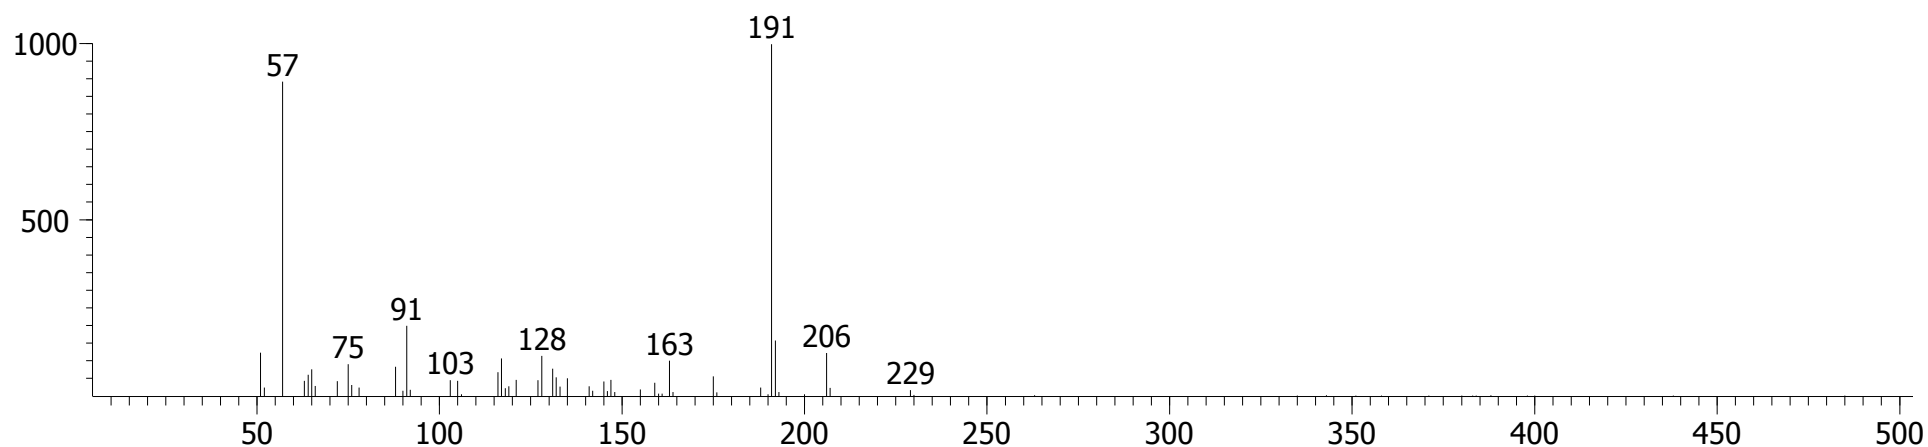

Library Hit - similarity 852, "Phenol, 2,4-bis(1,1-dimethylethyl)-"



Sample 2, Fraction 2 (DCM)

Benzoic acid, 4-ethoxy-, ethyl ester

CAS # = 23676-09-7  
1st Dimension R.T. = 995.274  
2nd Dimension R.T. = 0.977  
Quant Mass(es) = 194  
S/N = 5902.6  
Area = 313130  
Height = 52195

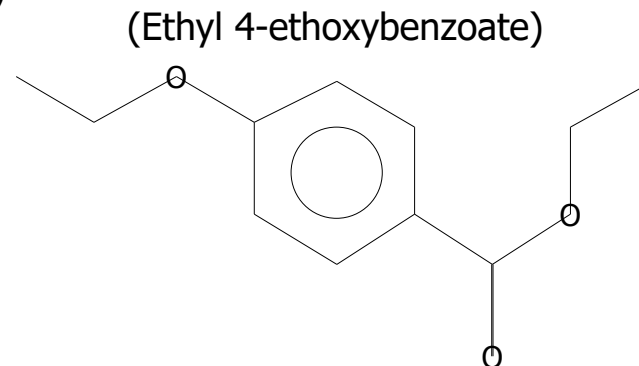

Peak True - sample "Lipid BM 2 F2:1", peak 954, at 995.274 , 0.977 sec , sec (Spec # 60038)

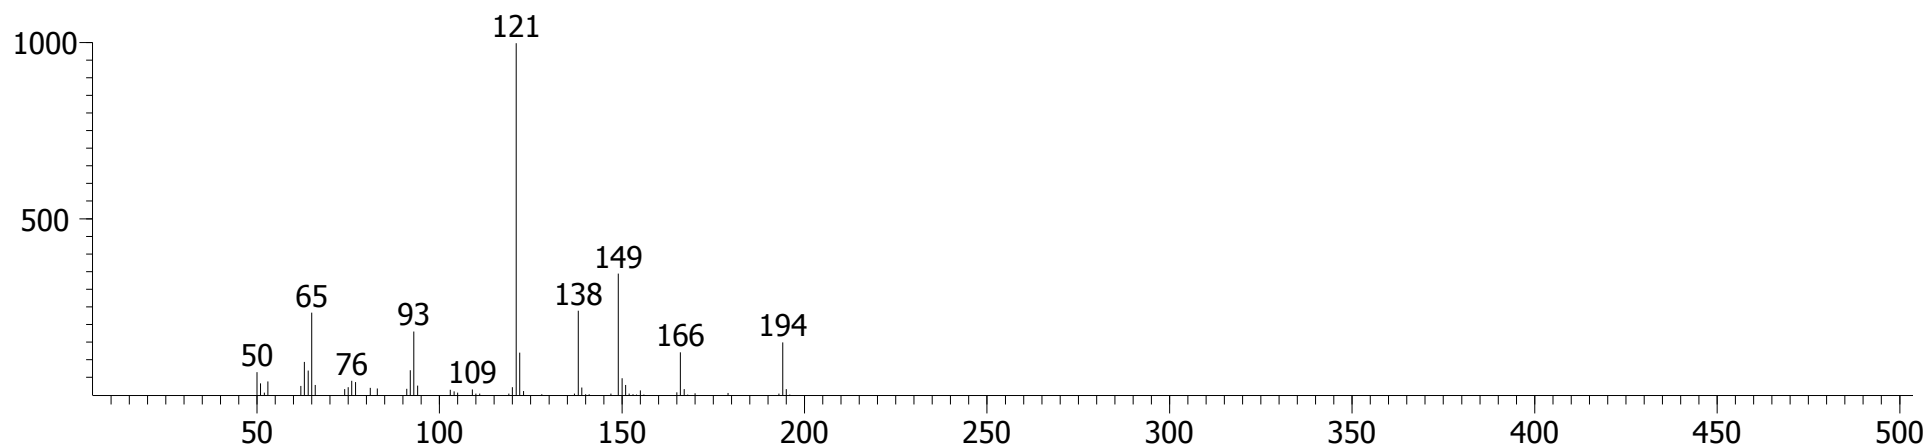

Library Hit - similarity 935, "Benzoic acid, 4-ethoxy-, ethyl ester"



Sample 2, Fraction 2 (DCM)

Benzene, 1-chloro-4-(methylsulfinyl)-

CAS # = 934-73-6  
1st Dimension R.T. = 1009.27  
2nd Dimension R.T. = 1.109  
Quant Mass(es) = 174  
S/N = 131.44  
Area = 8970.4  
Height = 1681.5

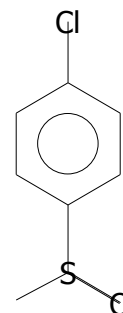

(p-Chlorophenyl methyl sulfoxide)

Peak True - sample "Lipid BM 2 F2:1", peak 997, at 1009.27 , 1.109 sec , sec (Spec # 62178)

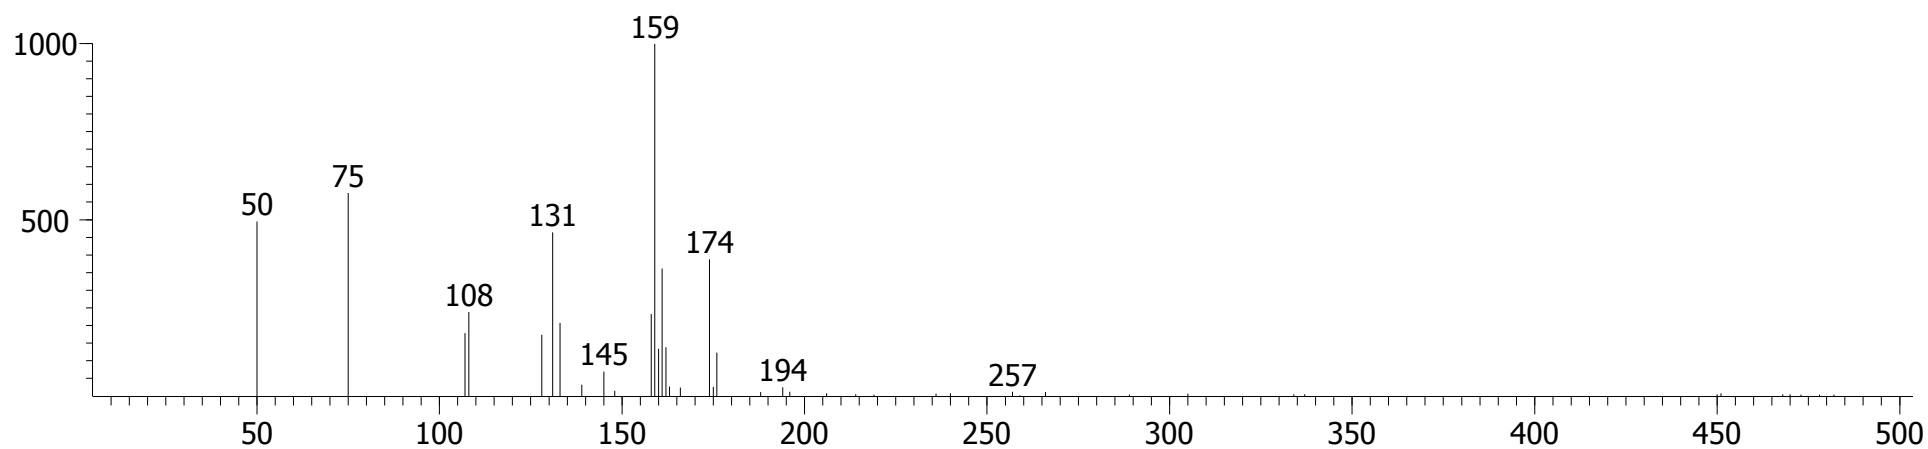

Library Hit - similarity 750, "Benzene, 1-chloro-4-(methylsulfinyl)-"

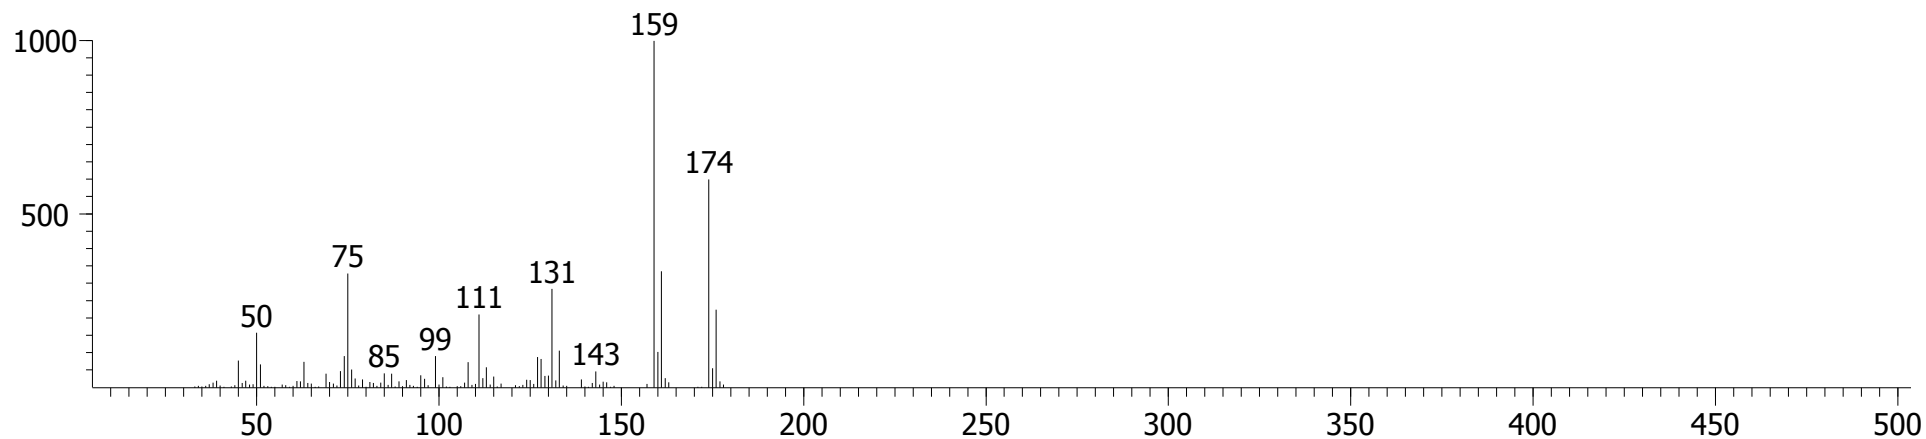

Sample 2, Fraction 2 (DCM)

Naphthalene, 1,4,5-trimethyl-

CAS # = 2131-41-1  
1st Dimension R.T. = 1012.76  
2nd Dimension R.T. = 0.990  
Quant Mass(es) = 170  
S/N = 189.93  
Area = 19768  
Height = 2864.1



(1,4,5-Trimethylnaphthalene)

Peak True - sample "Lipid BM 2 F2:1", peak 1006, at 1012.76 , 0.990 sec , sec (Spec # 62690)

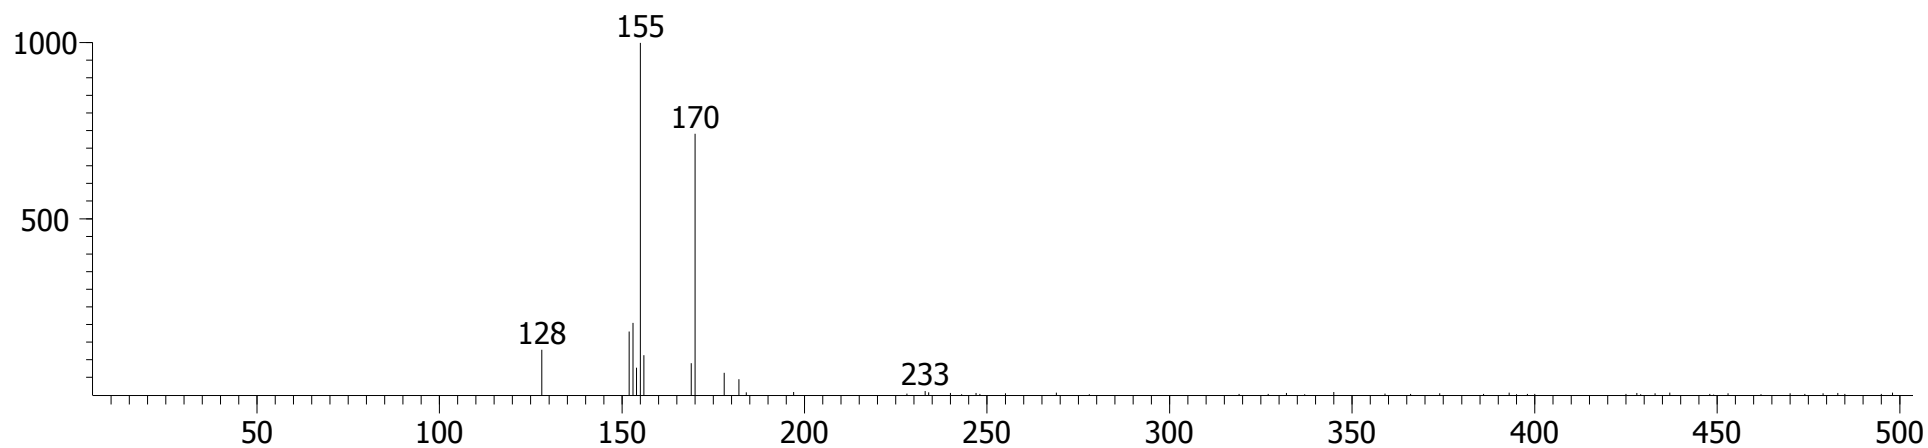

Library Hit - similarity 814, "Naphthalene, 1,4,5-trimethyl-"

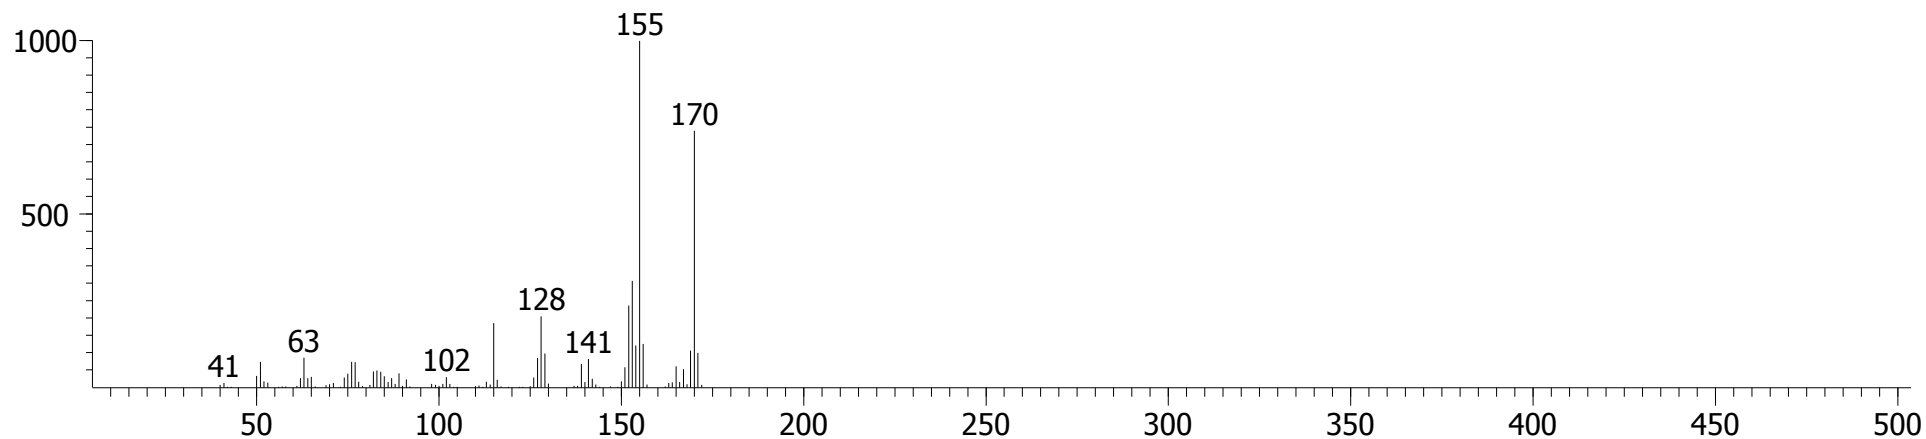

# Sample 2, Fraction 2 (DCM)

## Benzophenone

CAS # = 119-61-9  
1st Dimension R.T. = 1089.72  
2nd Dimension R.T. = 1.063  
Quant Mass(es) = 182  
S/N = 330.83  
Area = 73047  
Height = 9830.4



Peak True - sample "Lipid BM 2 F2:1", peak 1247, at 1089.72 , 1.063 sec , sec (Spec # 74361)

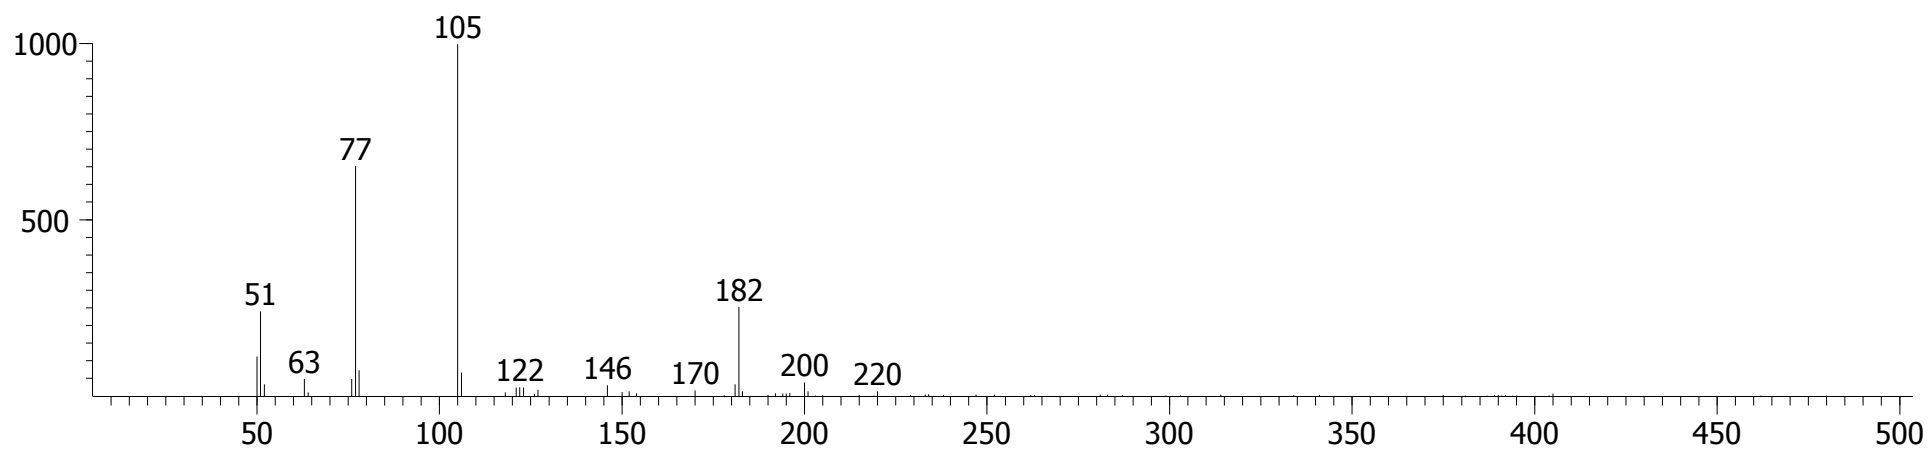

Library Hit - similarity 879, "Benzophenone"



# Sample 2, Fraction 2 (DCM)

## UNKNOWN # 5

CAS # = 117-71-5  
1st Dimension R.T. = 1184.17  
2nd Dimension R.T. = 1.069  
Quant Mass(es) = 220  
S/N = 442.14  
Area = 23361  
Height = 3285.0

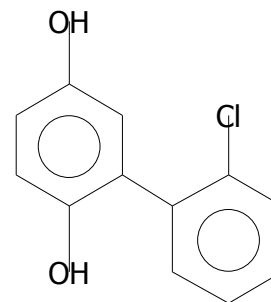

Peak True - sample "Lipid BM 2 F2:1", peak 1588, at 1184.17 , 1.069 sec , sec (Spec # 88672)

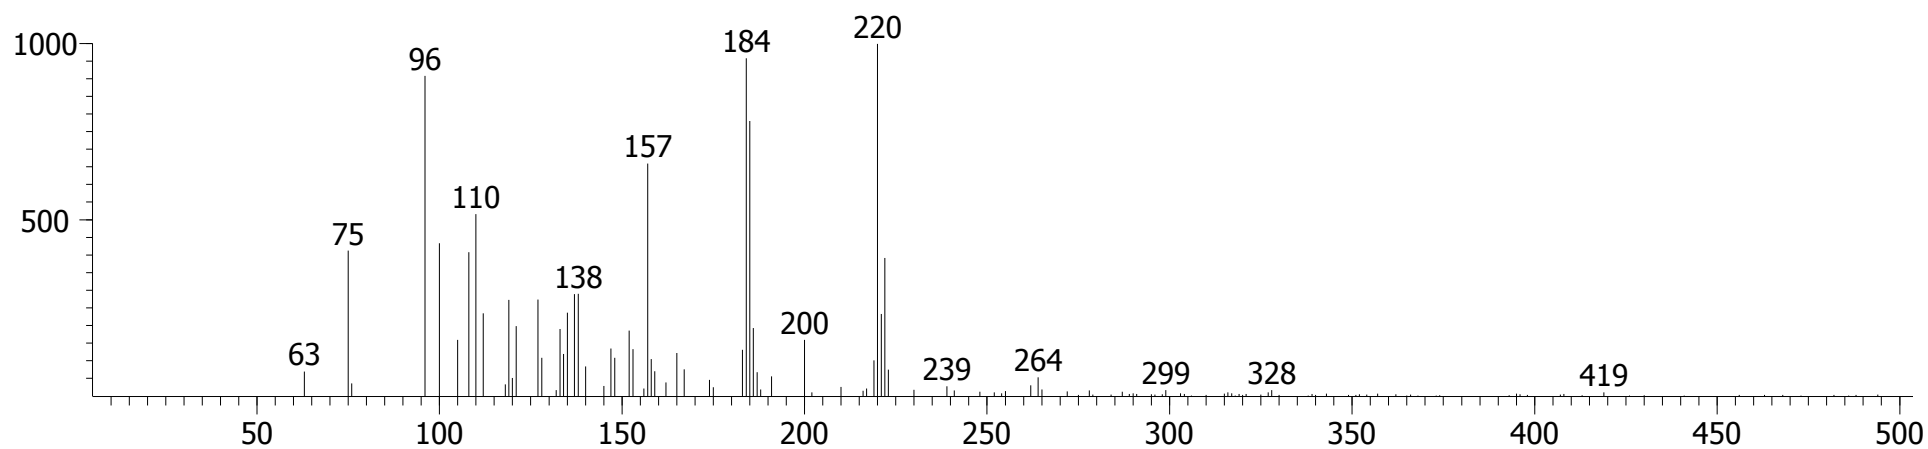

Library Hit - similarity 577, "[1,1'-Biphenyl]-2,5-diol, 2'-chloro-"

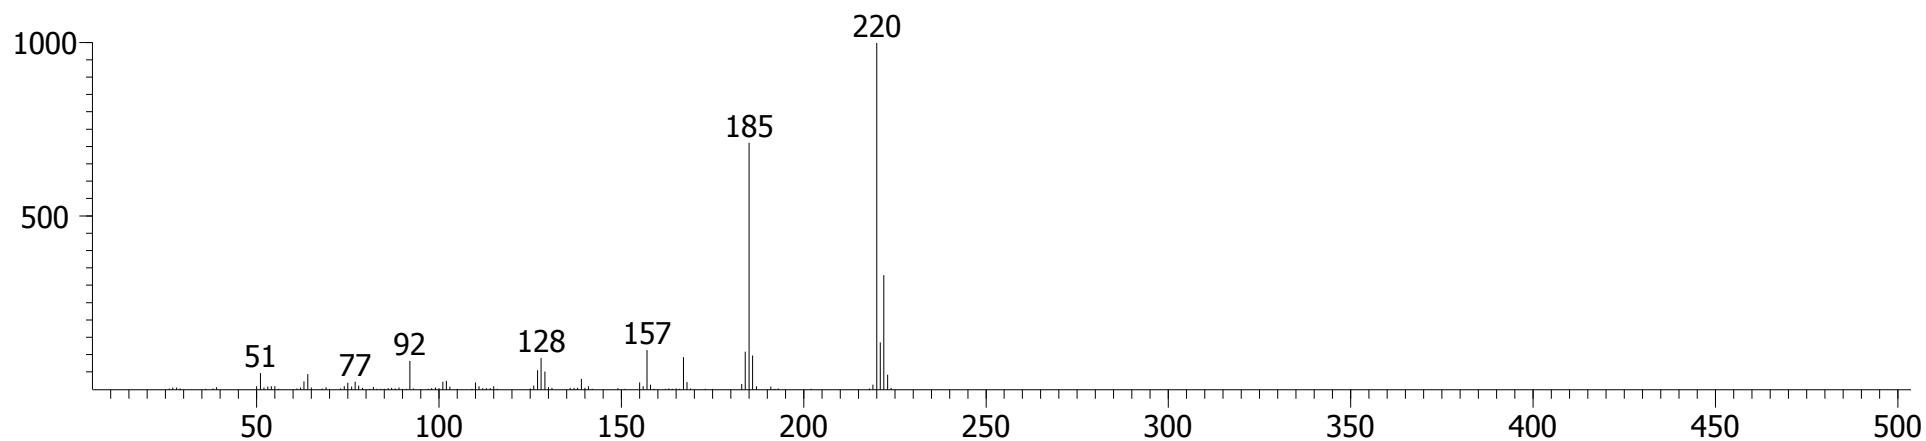

Sample 2, Fraction 2 (DCM)

Benzene, 1,1'-oxybis[4-chloro-

(4,4'-Dichlorodiphenylether)

CAS # = 2444-89-5  
1st Dimension R.T. = 1187.66  
2nd Dimension R.T. = 1.049  
Quant Mass(es) = 238  
S/N = 199.41  
Area = 8931.1  
Height = 1321.3

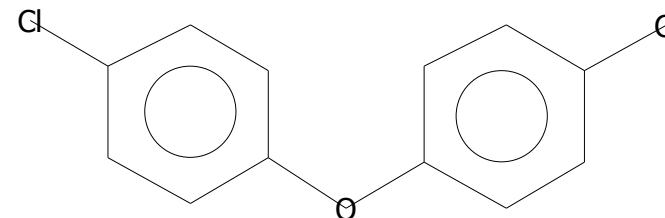

Peak True - sample "Lipid BM 2 F2:1", peak 1602, at 1187.66 , 1.049 sec , sec (Spec # 89199)

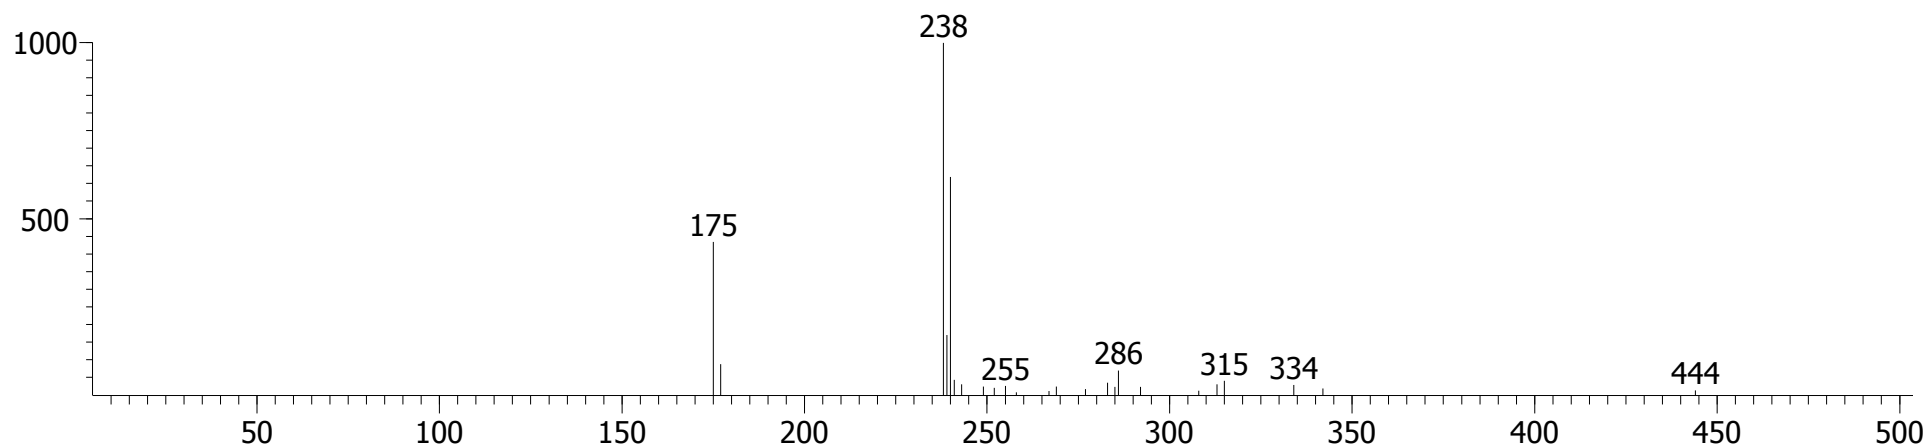

Library Hit - similarity 785, "Benzene, 1,1'-oxybis[4-chloro-"

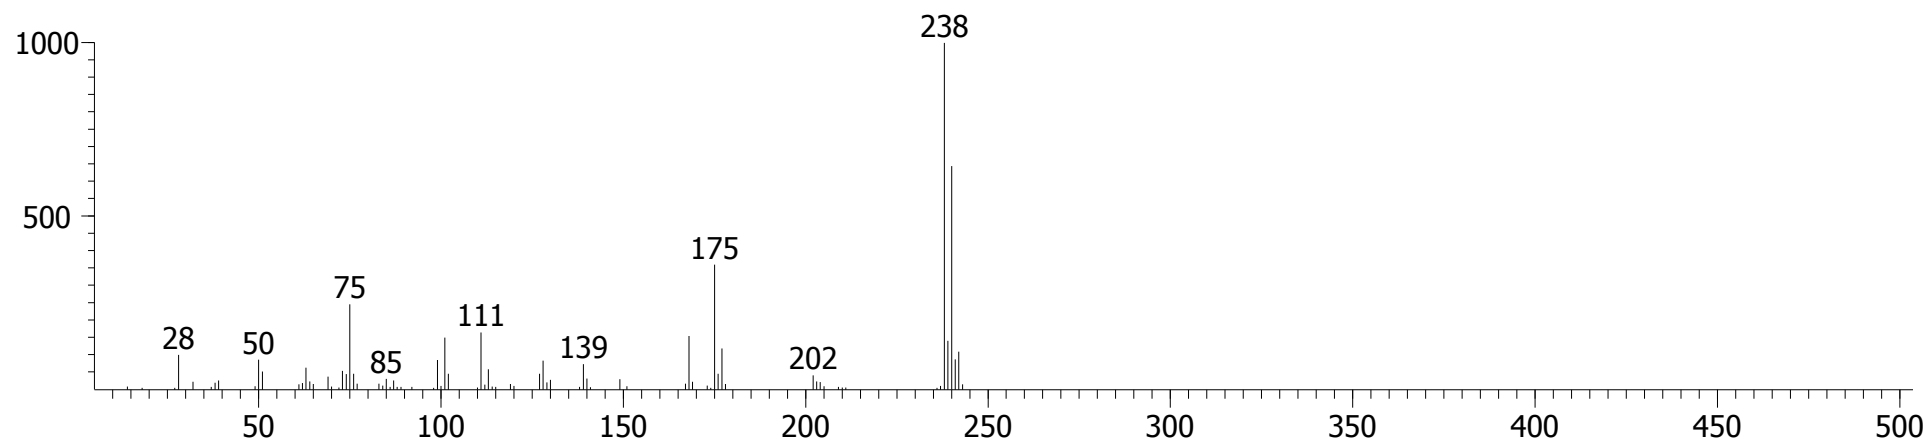

# Sample 2, Fraction 3 (Water)

## Hydroquinone

CAS # = 123-31-9  
1st Dimension R.T. = 809.88  
2nd Dimension R.T. = 1.043  
Quant Mass(es) = 110  
S/N = 113.41  
Area = 21197  
Height = 3690.5

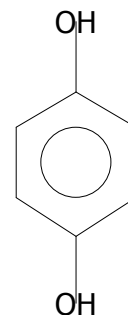

Peak True - sample "BM Water 2:1", peak 411, at 809.88 , 1.043 sec , sec (Spec # 31958)

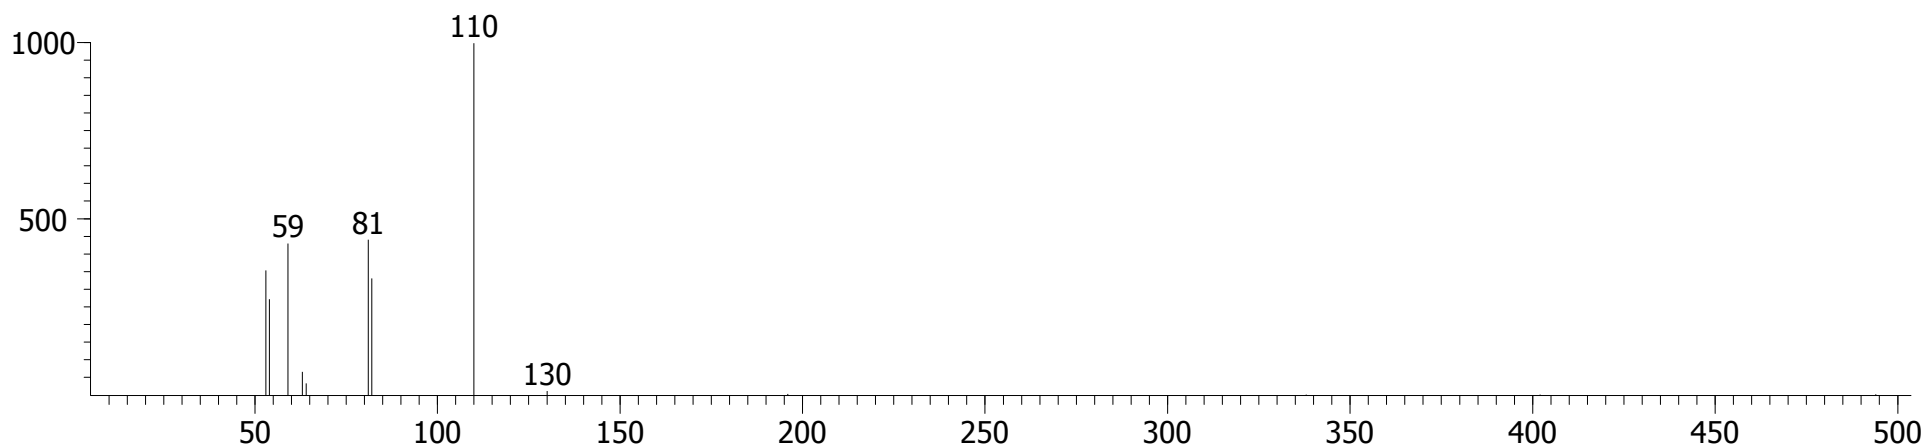

Library Hit - similarity 798, "Hydroquinone"

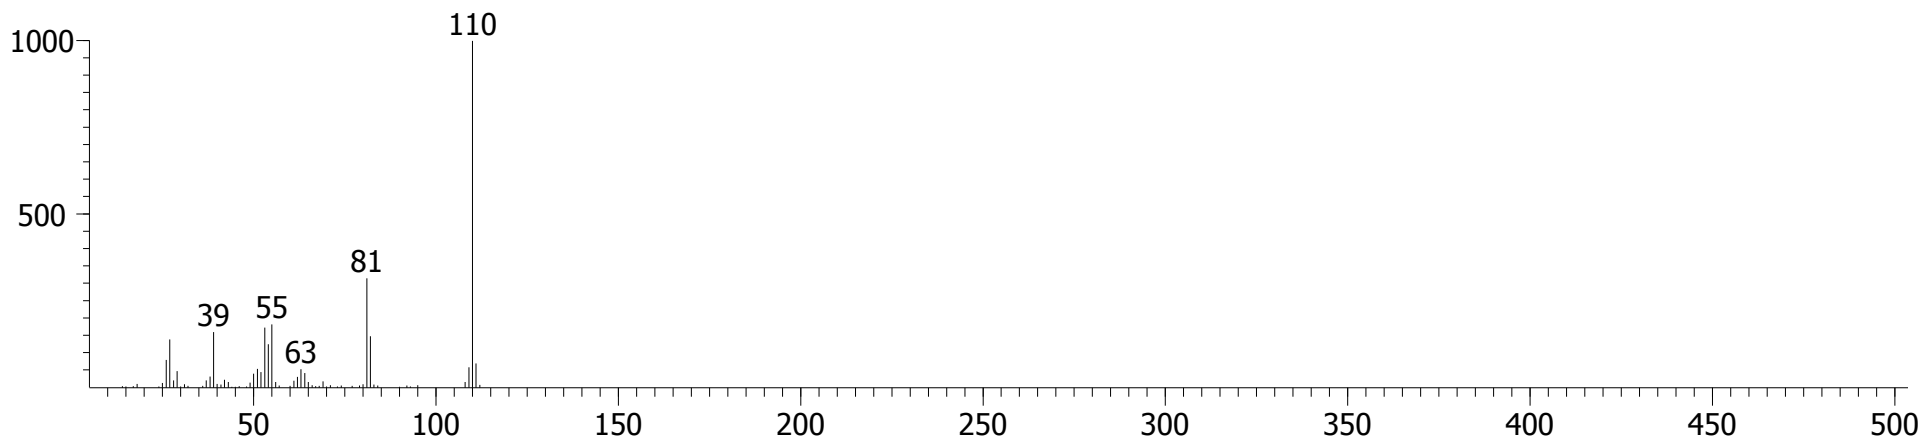



# Sample 2, Fraction 3 (Water)

## Benzylidenemalonaldehyde

CAS # = 82700-43-4  
1st Dimension R.T. = 813.378  
2nd Dimension R.T. = 0.990  
Quant Mass(es) = 131  
S/N = 173.02  
Area = 26339  
Height = 4719.6

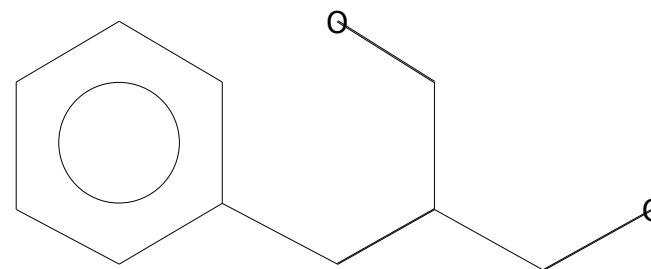

Peak True - sample "BM Water 2:1", peak 420, at 813.378 , 0.990 sec , sec (Spec # 32480)

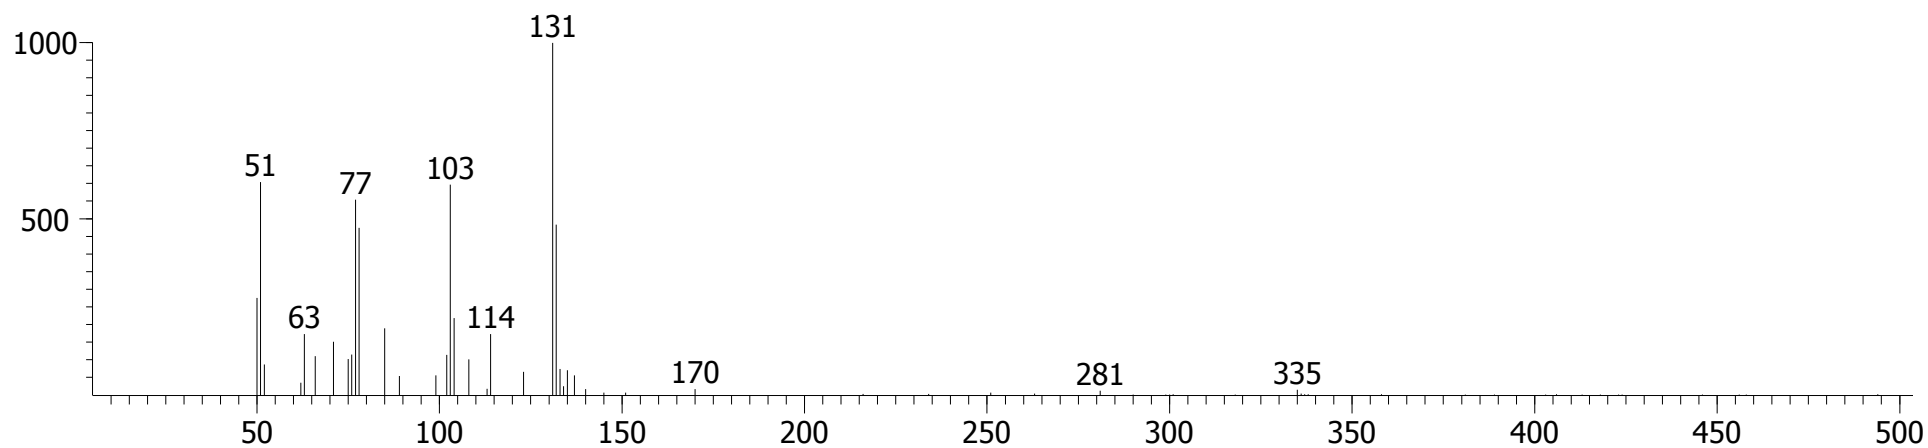

Library Hit - similarity 844, "Benzylidenemalonaldehyde"

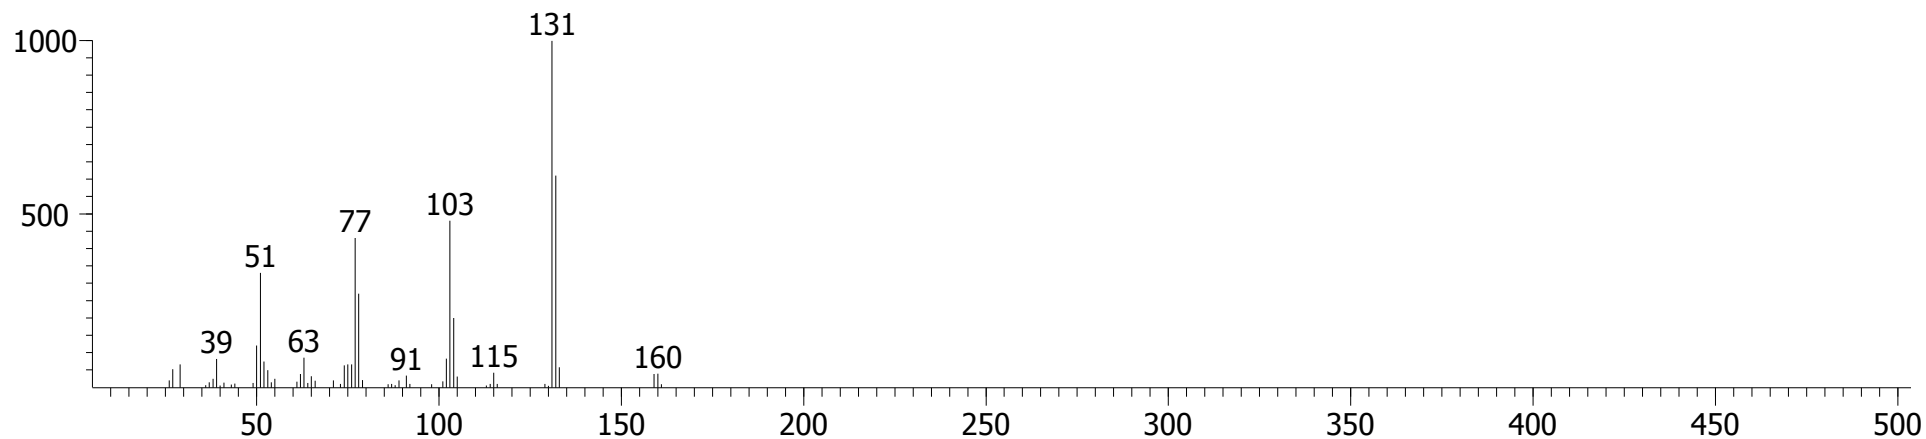

# Sample 2, Fraction 3 (Water)

## Picolinamide

CAS # = 1452-77-3  
1st Dimension R.T. = 813.378  
2nd Dimension R.T. = 1.063  
Quant Mass(es) = 122  
S/N = 67.679  
Area = 6230.1  
Height = 1427.2

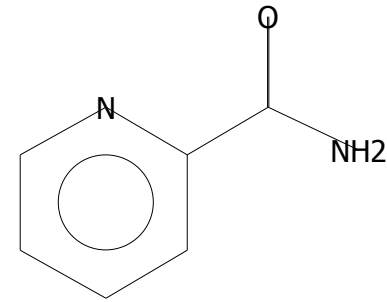

Peak True - sample "BM Water 2:1", peak 423, at 813.378 , 1.063 sec , sec (Spec # 32491)

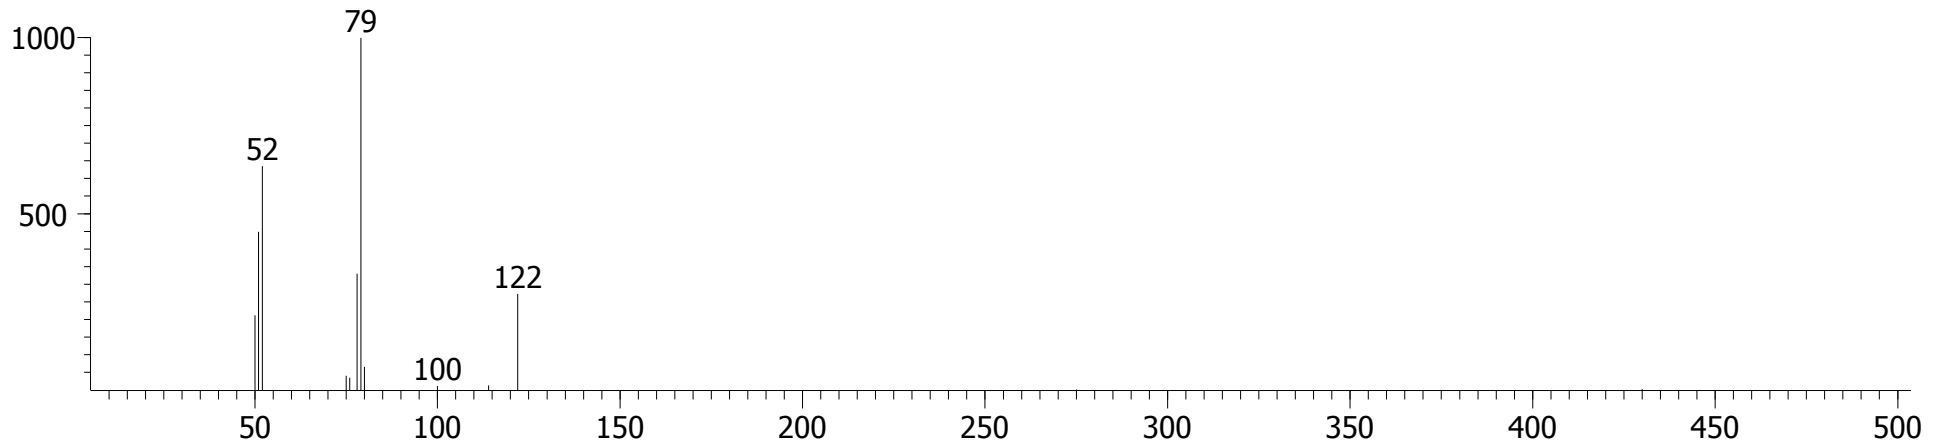

Library Hit - similarity 964, "Picolinamide"

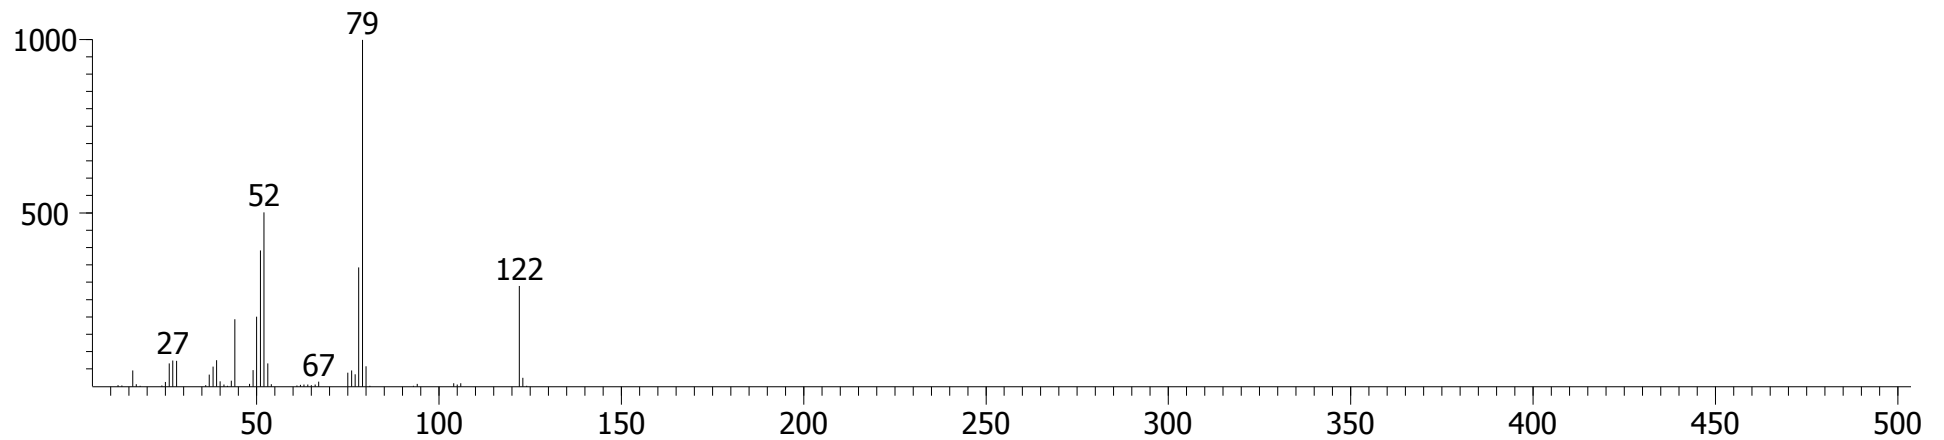

# Sample 2, Fraction 3 (Water)

## Hydroquinone

CAS # = 123-31-9  
1st Dimension R.T. = 820.374  
2nd Dimension R.T. = 1.043  
Quant Mass(es) = 110  
S/N = 164.42  
Area = 64713  
Height = 9448.8

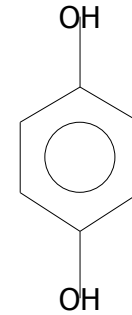

Peak True - sample "BM Water 2:1", peak 438, at 820.374 , 1.043 sec , sec (Spec # 33548)

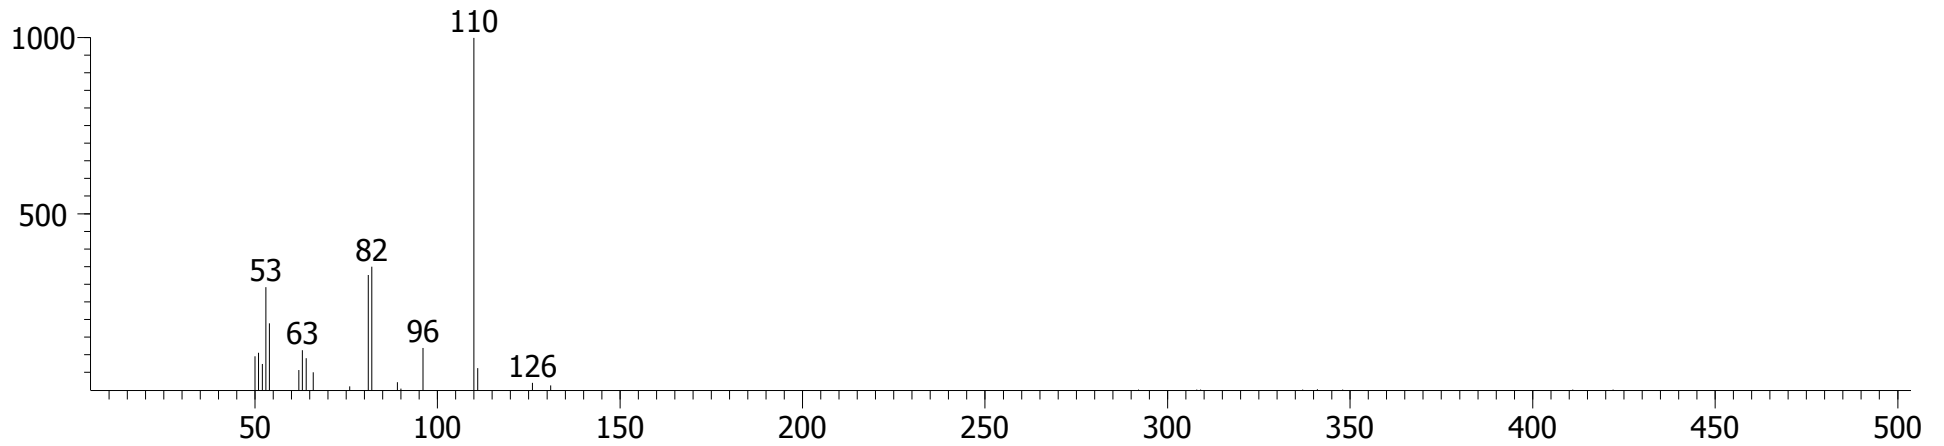

Library Hit - similarity 862, "Hydroquinone"

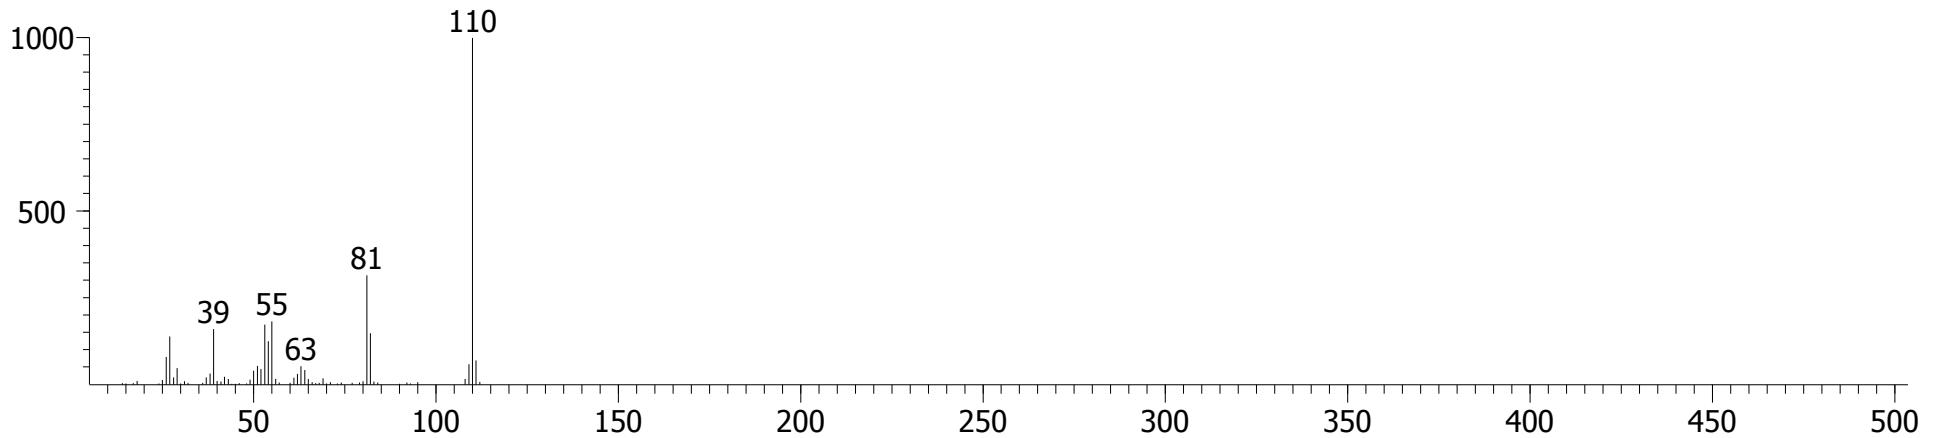

Sample 2, Fraction 3 (Water)

1H-Inden-1-one, 2,3-dihydro-

CAS # = 83-33-0  
1st Dimension R.T. = 827.37  
2nd Dimension R.T. = 1.030  
Quant Mass(es) = 132  
S/N = 575.64  
Area = 75623  
Height = 13905

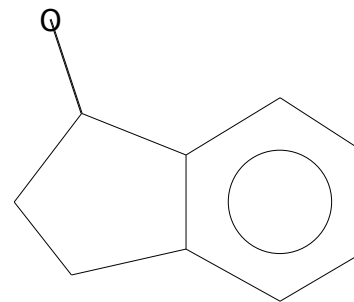

Peak True - sample "BM Water 2:1", peak 455, at 827.37 , 1.030 sec , sec (Spec # 34606)

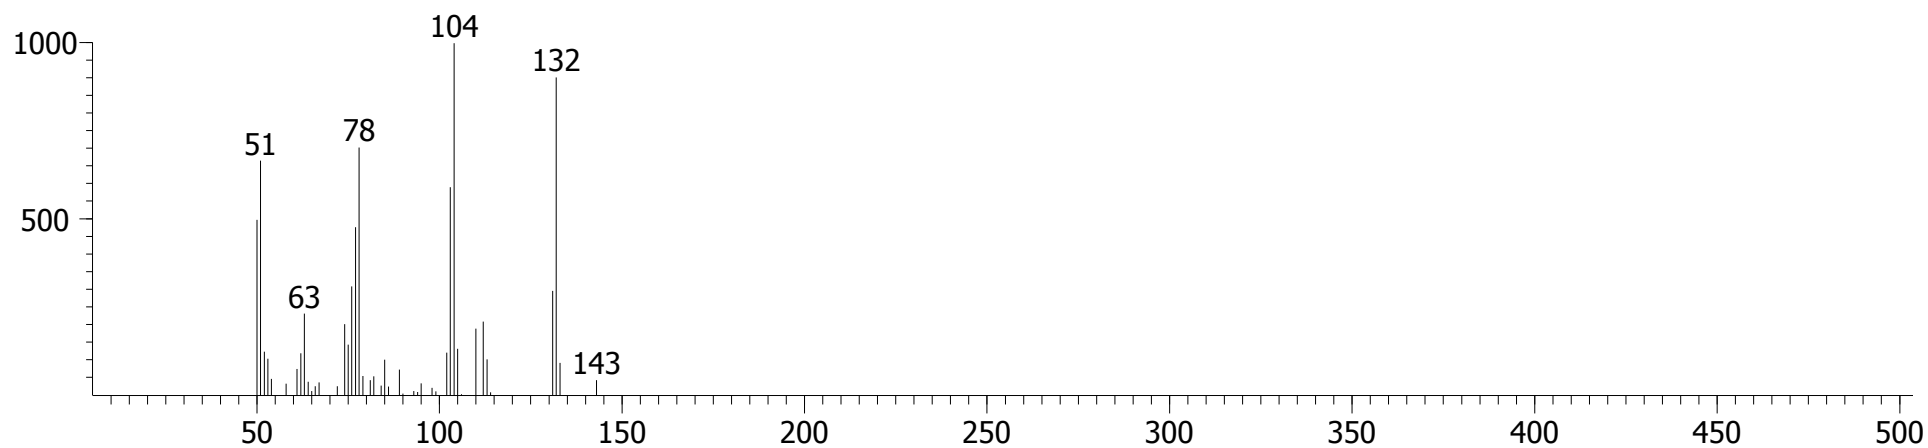

Library Hit - similarity 852, "1H-Inden-1-one, 2,3-dihydro-"

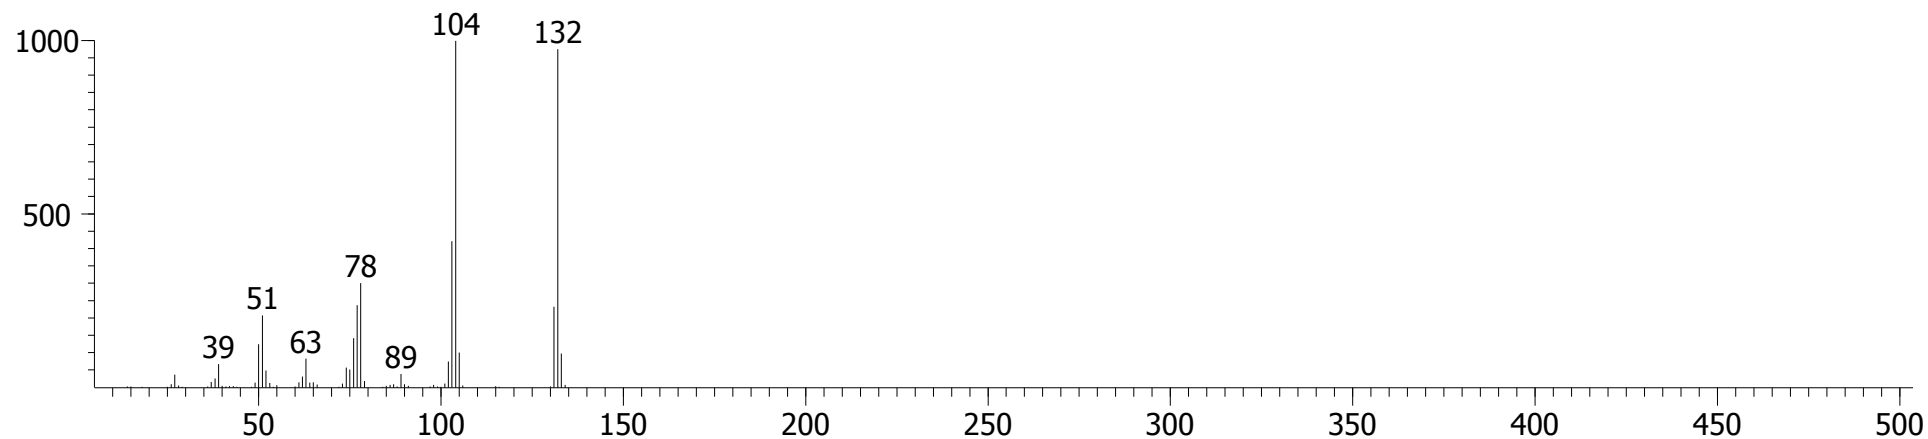

# Sample 2, Fraction 3 (Water)

## 5H-1-Pyridine

CAS # = 270-91-7  
1st Dimension R.T. = 834.366  
2nd Dimension R.T. = 1.056  
Quant Mass(es) = 117  
S/N = 1290.1  
Area = 301709  
Height = 55206



Peak True - sample "BM Water 2:1", peak 473, at 834.366 , 1.056 sec , sec (Spec # 35670)

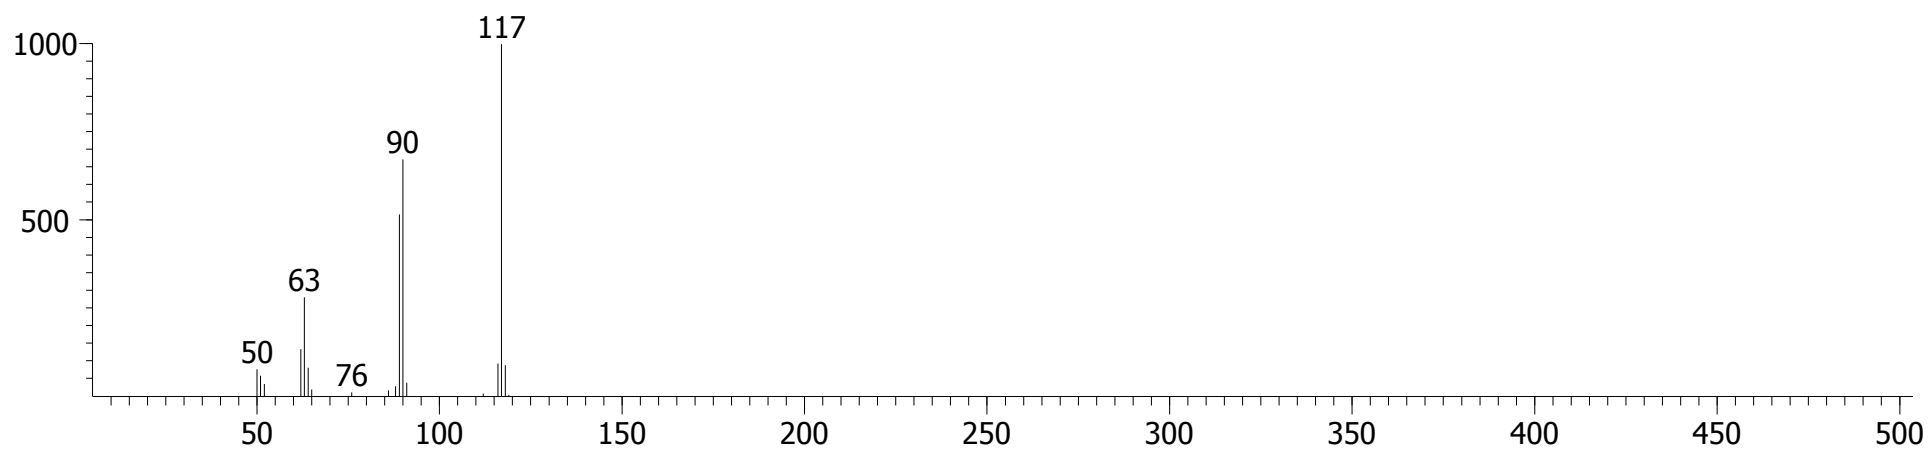

Library Hit - similarity 920, "5H-1-Pyridine"



# Sample 2, Fraction 3 (Water)

## Hex-1-enylbenzene

CAS # = 828-15-9

1st Dimension R.T. = 851.856

2nd Dimension R.T. = 0.898

Quant Mass(es) = 160

S/N = 277.28

Area = 9583.0

Height = 1989.7



Peak True - sample "BM Water 2:1", peak 506, at 851.856 , 0.898 sec , sec (Spec # 38296)

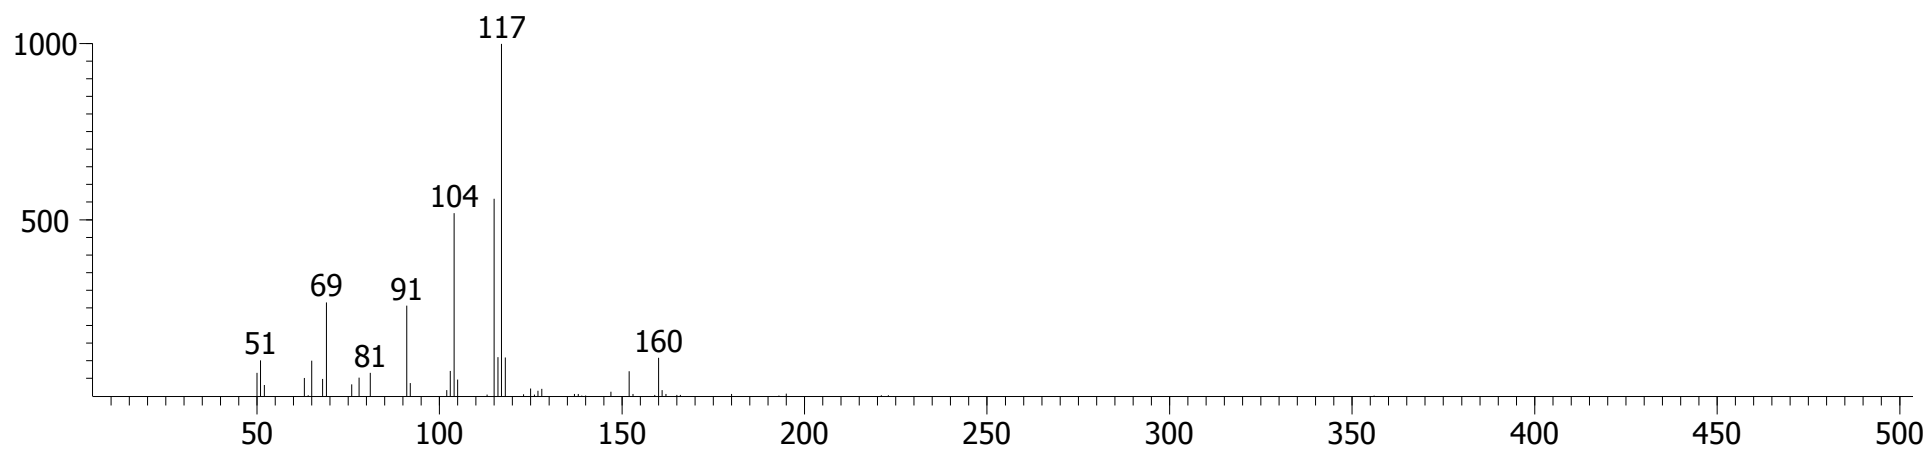

Library Hit - similarity 788, "Hex-1-enylbenzene"

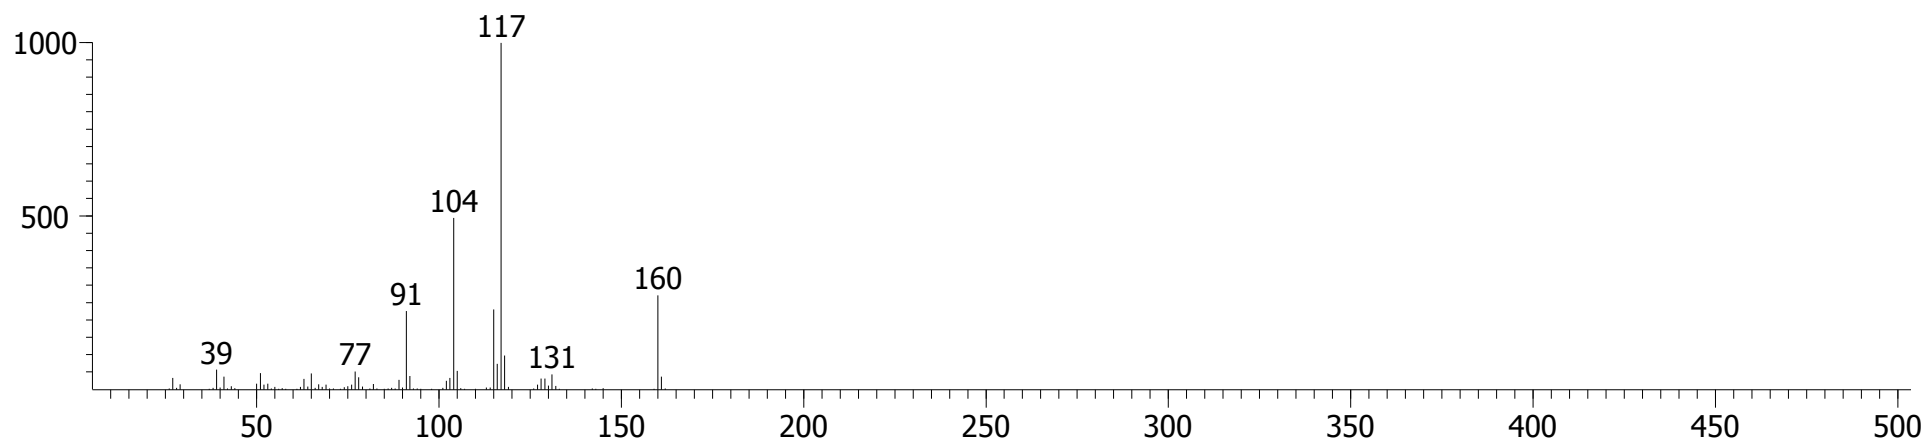

Sample 2, Fraction 3 (Water)

2,5-Pyrrolidinedione  
1-[(3,4-dimethylbenzoyl)oxy]-

CAS # = 0-00-0  
1st Dimension R.T. = 879.84  
2nd Dimension R.T. = 0.957  
Quant Mass(es) = 133  
S/N = 108.59  
Area = 50819  
Height = 8210.1

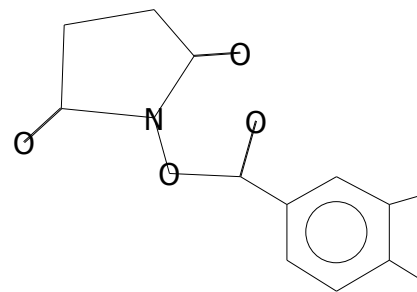

Peak True - sample "BM Water 2:1", peak 574, at 879.84 , 0.957 sec , sec (Spec # 42545)

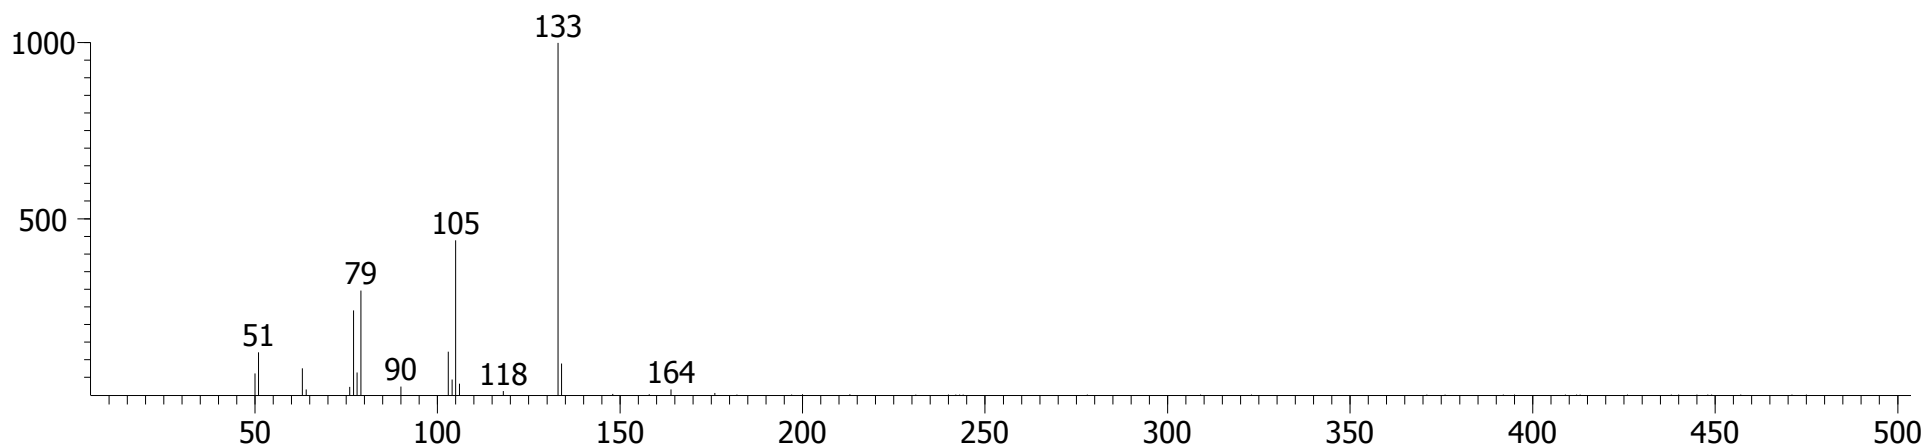

Library Hit - similarity 912, "2,5-Pyrrolidinedione, 1-[(3,4-dimethylbenzoyl)oxy]-"

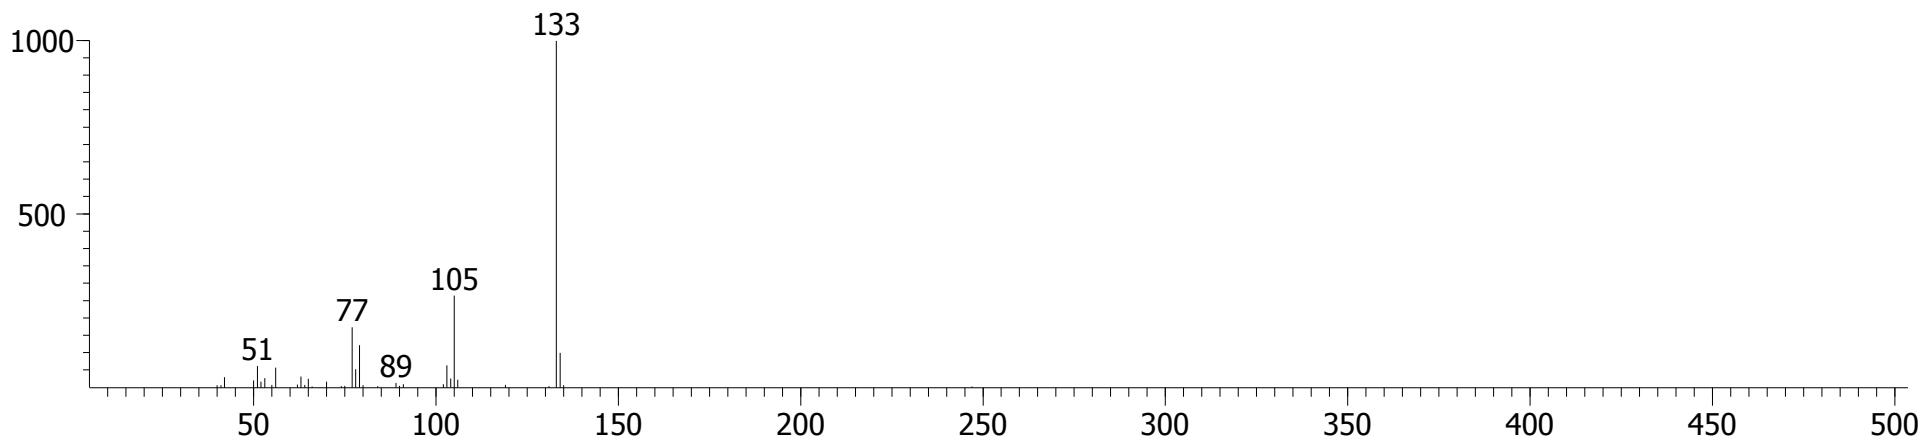

Sample 2, Fraction 3 (Water)

Propanoic acid, 3-chloro-, 4-formylphenyl ester

CAS # = 0-00-0  
1st Dimension R.T. = 883.338  
2nd Dimension R.T. = 1.069  
Quant Mass(es) = 122  
S/N = 205.47  
Area = 38340  
Height = 4471.3

(4-Formylphenyl 3-chloropropanoate)

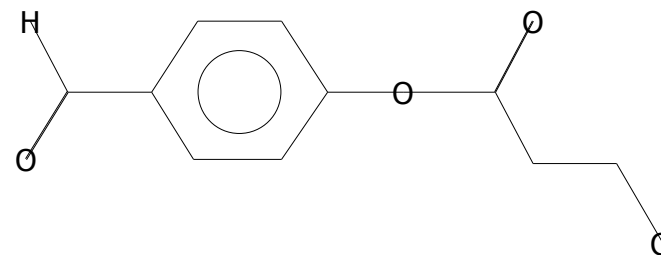

Peak True - sample "BM Water 2:1", peak 585, at 883.338 , 1.069 sec , sec (Spec # 43092)

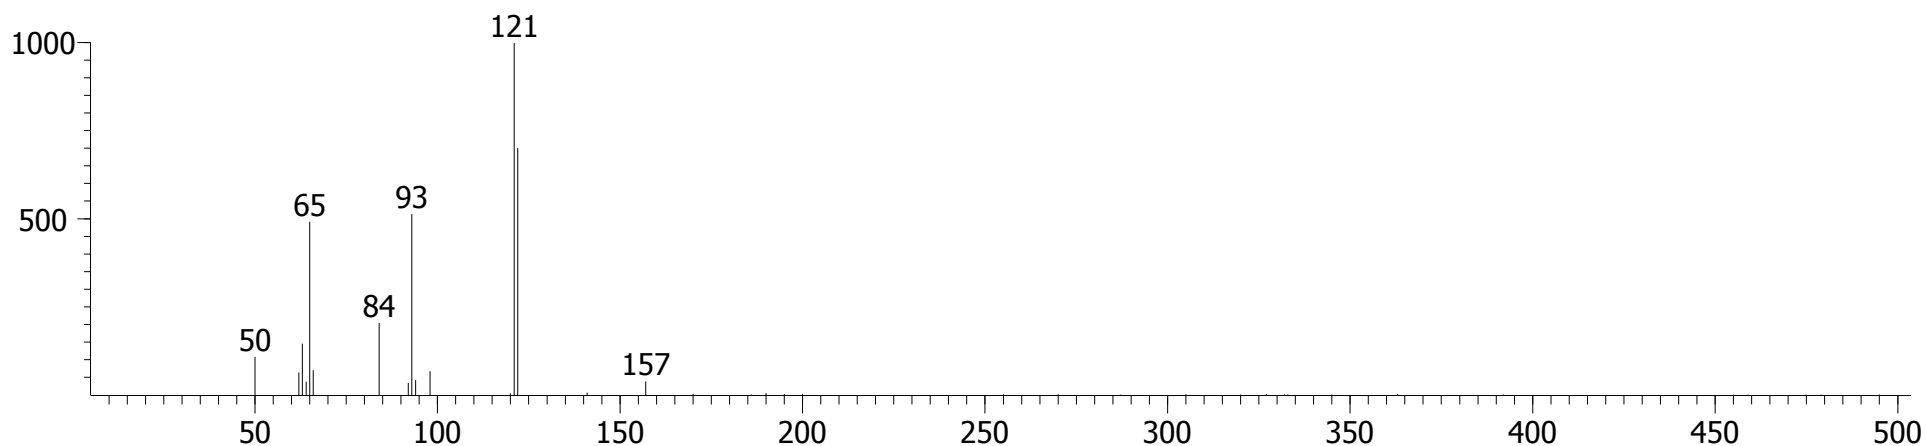

Library Hit - similarity 880, "Propanoic acid, 3-chloro-, 4-formylphenyl ester"

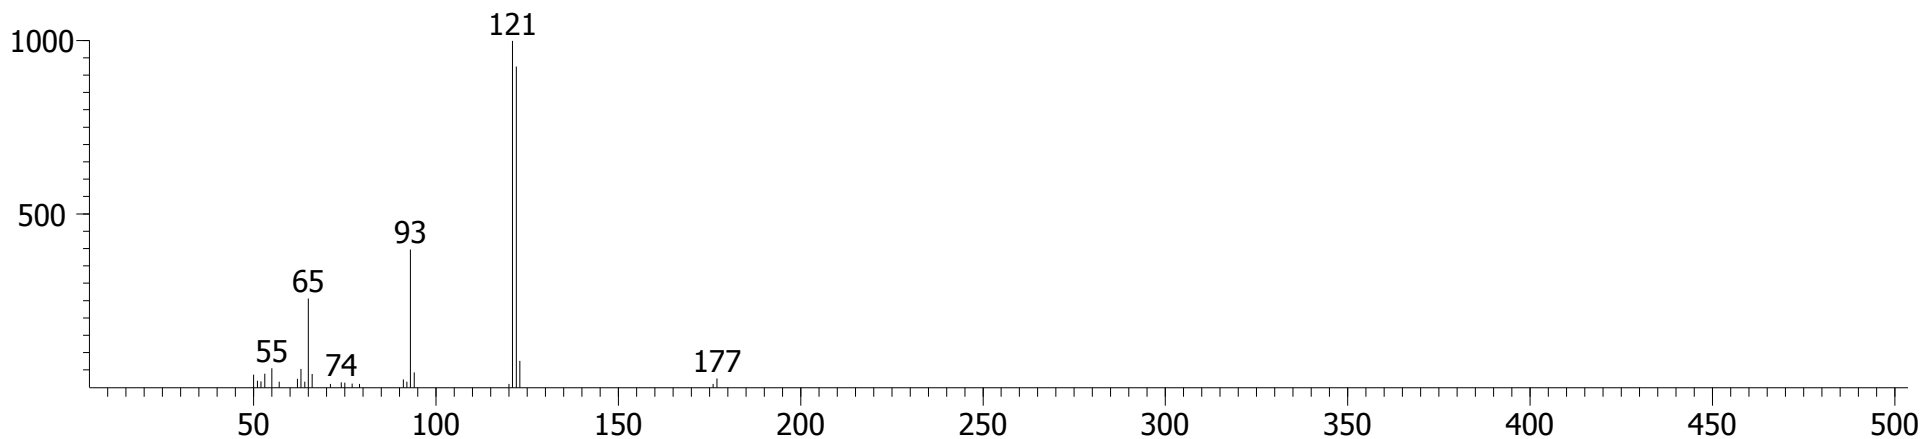



Sample 2, Fraction 3 (Water)

Benzamide

CAS # = 55-21-0  
1st Dimension R.T. = 890.334  
2nd Dimension R.T. = 1.122  
Quant Mass(es) = 121  
S/N = 3858.1  
Area = 523251  
Height = 118496

(Phenylamide)

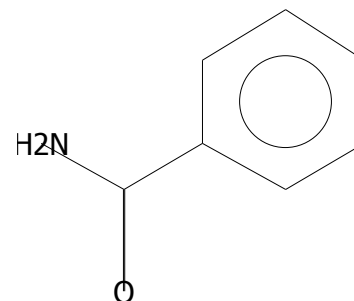

Peak True - sample "BM Water 2:1", peak 604, at 890.334 , 1.122 sec , sec (Spec # 44160)

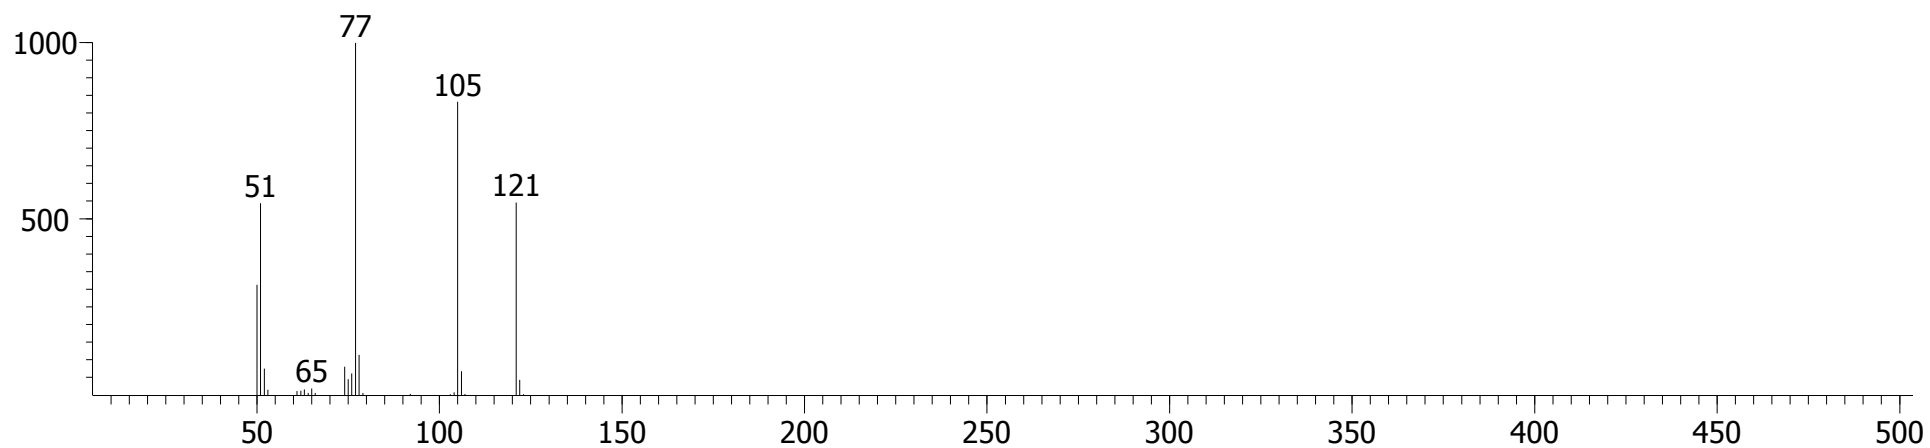

Library Hit - similarity 956, "Benzamide"

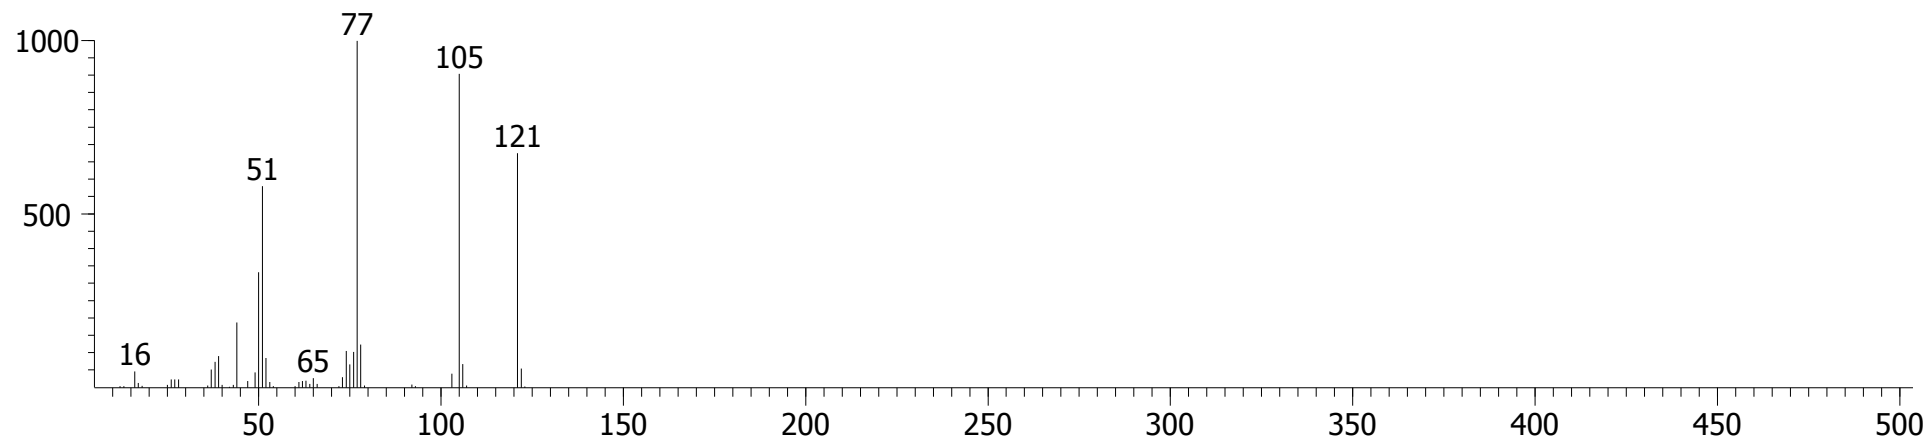

Sample 2, Fraction 3 (Water)

1H-Indole, 2-methyl-

CAS # = 95-20-5  
1st Dimension R.T. = 911.322  
2nd Dimension R.T. = 1.049  
Quant Mass(es) = 130  
S/N = 380.03  
Area = 226679  
Height = 34203

(2-Methylindole)



Peak True - sample "BM Water 2:1", peak 660, at 911.322 , 1.049 sec , sec (Spec # 47329)

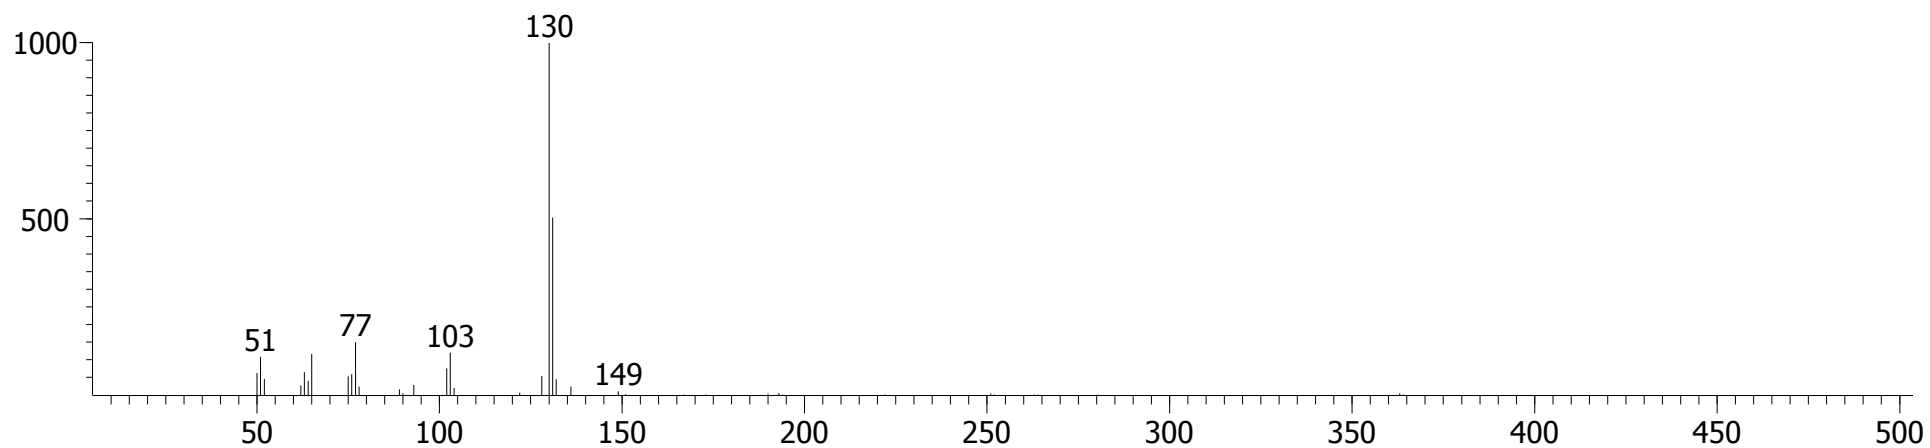

Library Hit - similarity 926, "1H-Indole, 2-methyl-"

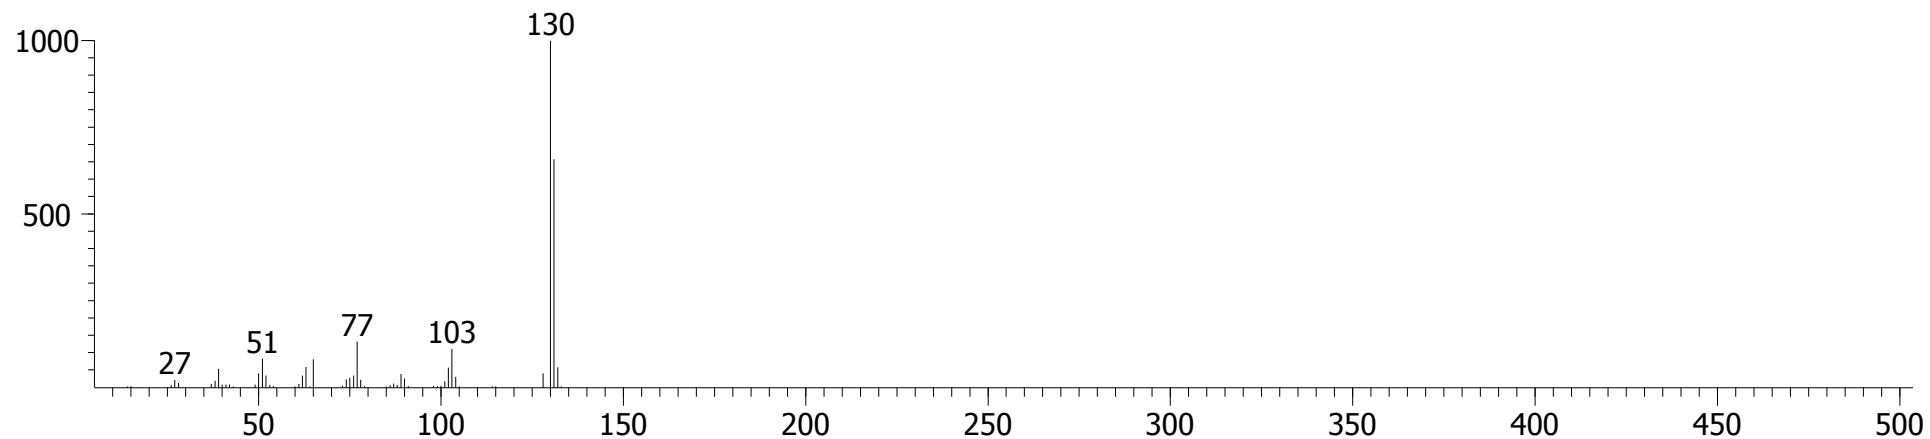

# Sample 2, Fraction 3 (Water)

## 7-Methylindan-1-one

CAS # = 39627-61-7

1st Dimension R.T. = 932.31

2nd Dimension R.T. = 1.043

Quant Mass(es) = 146

S/N = 524.89

Area = 48459

Height = 8509.8

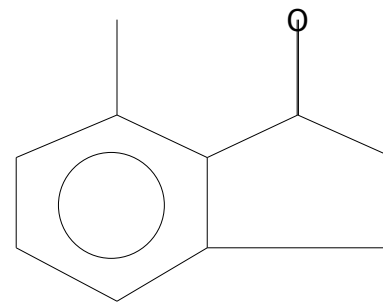

Peak True - sample "BM Water 2:1", peak 721, at 932.31 , 1.043 sec , sec (Spec # 50508)

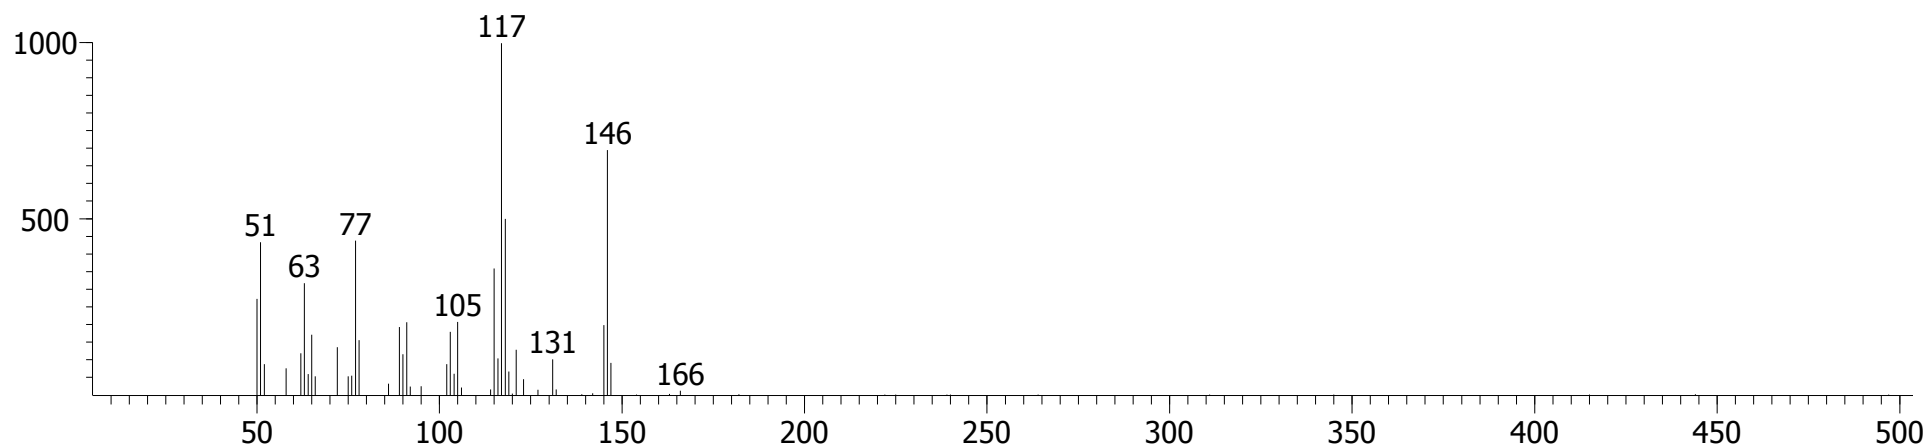

Library Hit - similarity 804, "7-Methylindan-1-one"

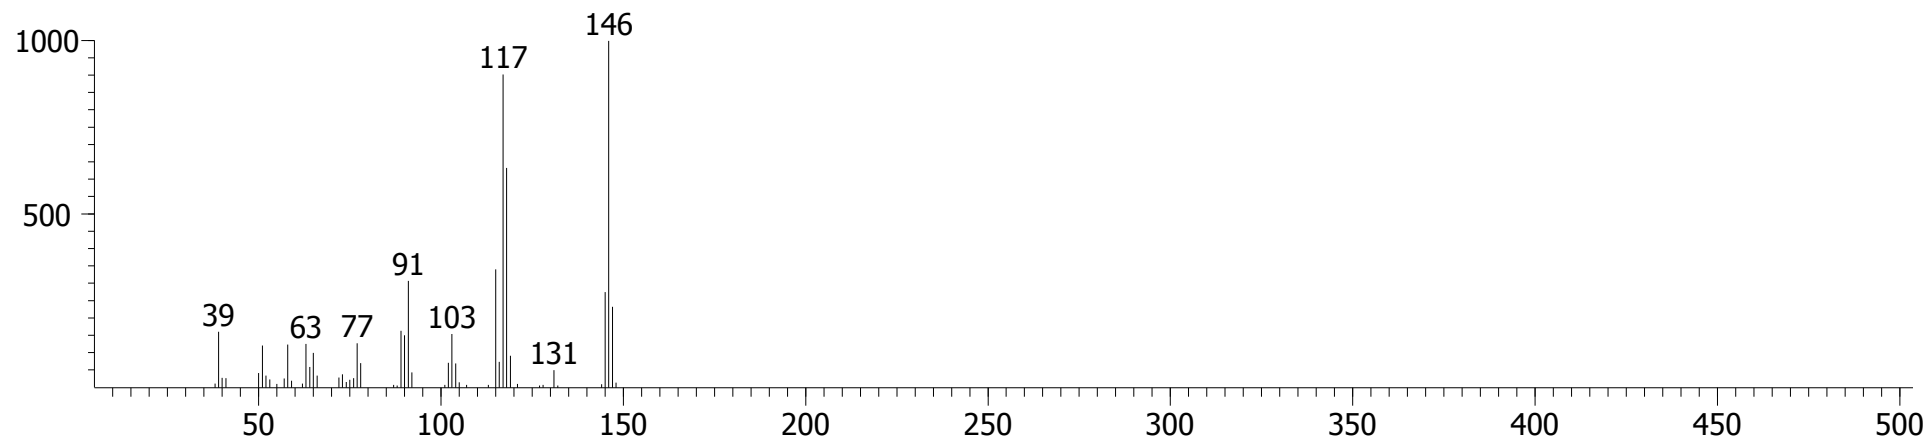

Sample 2, Fraction 3 (Water)

1-Octanone, 1-phenyl-

CAS # = 1674-37-9  
1st Dimension R.T. = 956.796  
2nd Dimension R.T. = 0.950  
Quant Mass(es) = 120  
S/N = 2907.2  
Area = 599322  
Height = 112027

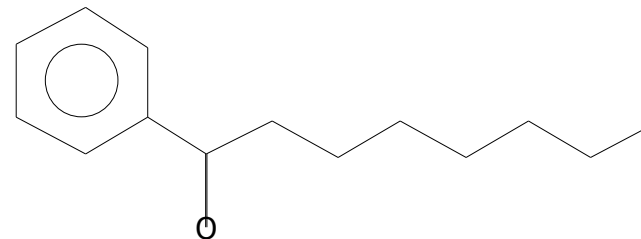

Peak True - sample "BM Water 2:1", peak 789, at 956.796 , 0.950 sec , sec (Spec # 54204)

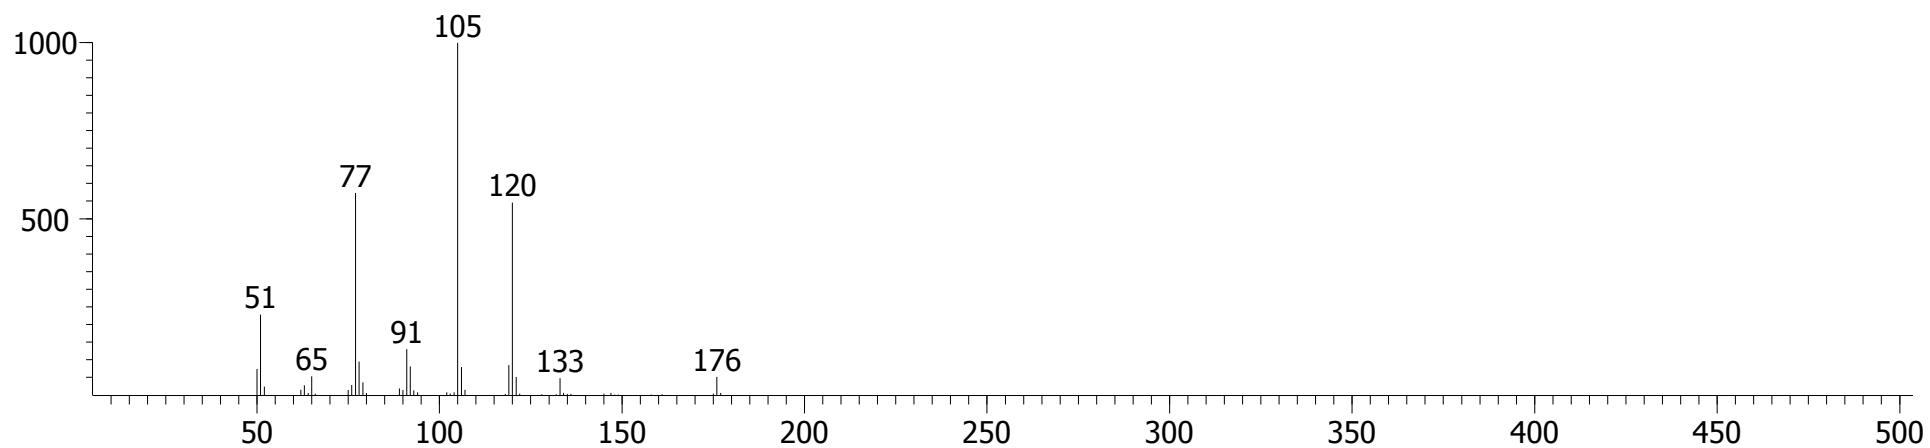

Library Hit - similarity 830, "1-Octanone, 1-phenyl-"

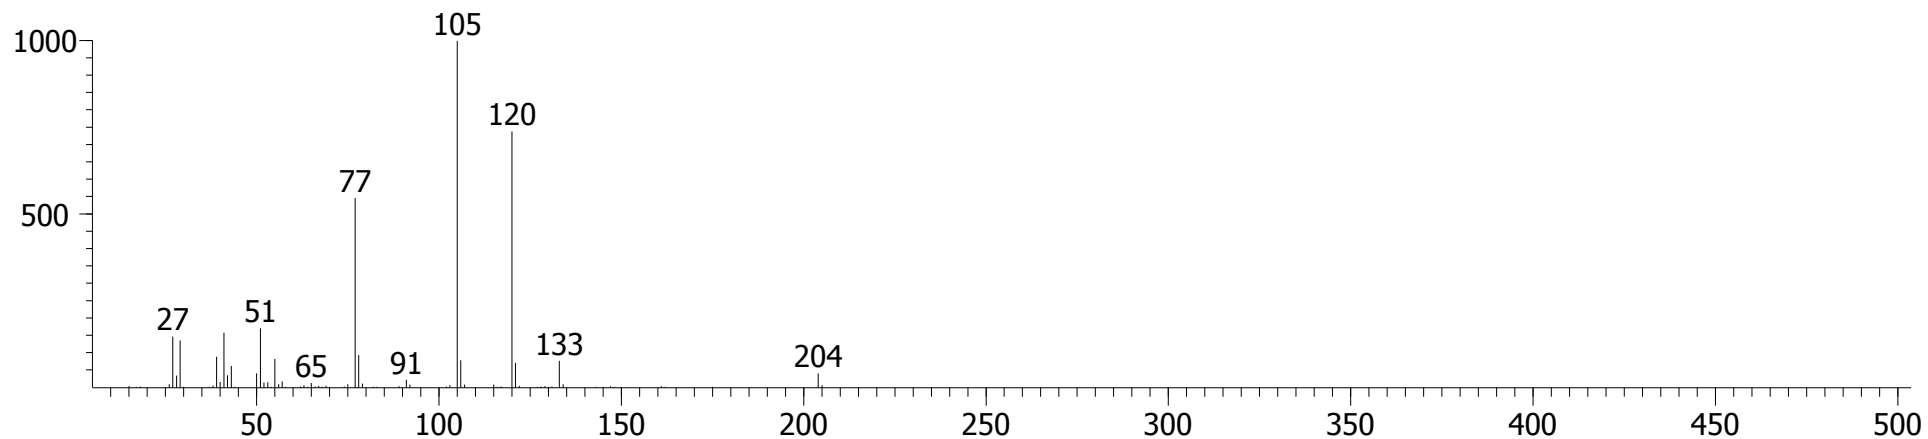

Sample 2, Fraction 3 (Water)

2H-Indol-2-one, 1,3-dihydro-

CAS # = 59-48-3  
1st Dimension R.T. = 984.78  
2nd Dimension R.T. = 1.115  
Quant Mass(es) = 133  
S/N = 351.36  
Area = 86277  
Height = 17456

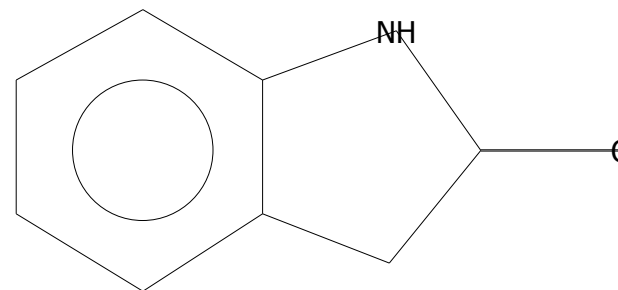

Peak True - sample "BM Water 2:1", peak 877, at 984.78 , 1.115 sec , sec (Spec # 58469)

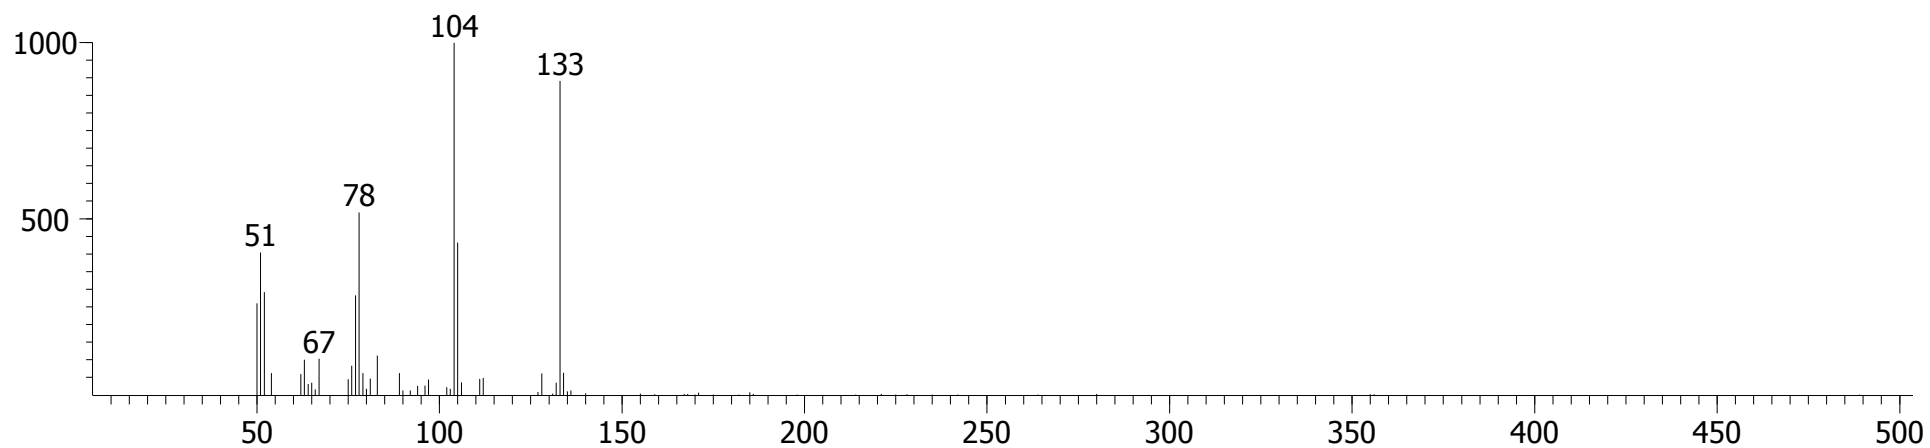

Library Hit - similarity 861, "2H-Indol-2-one, 1,3-dihydro-"

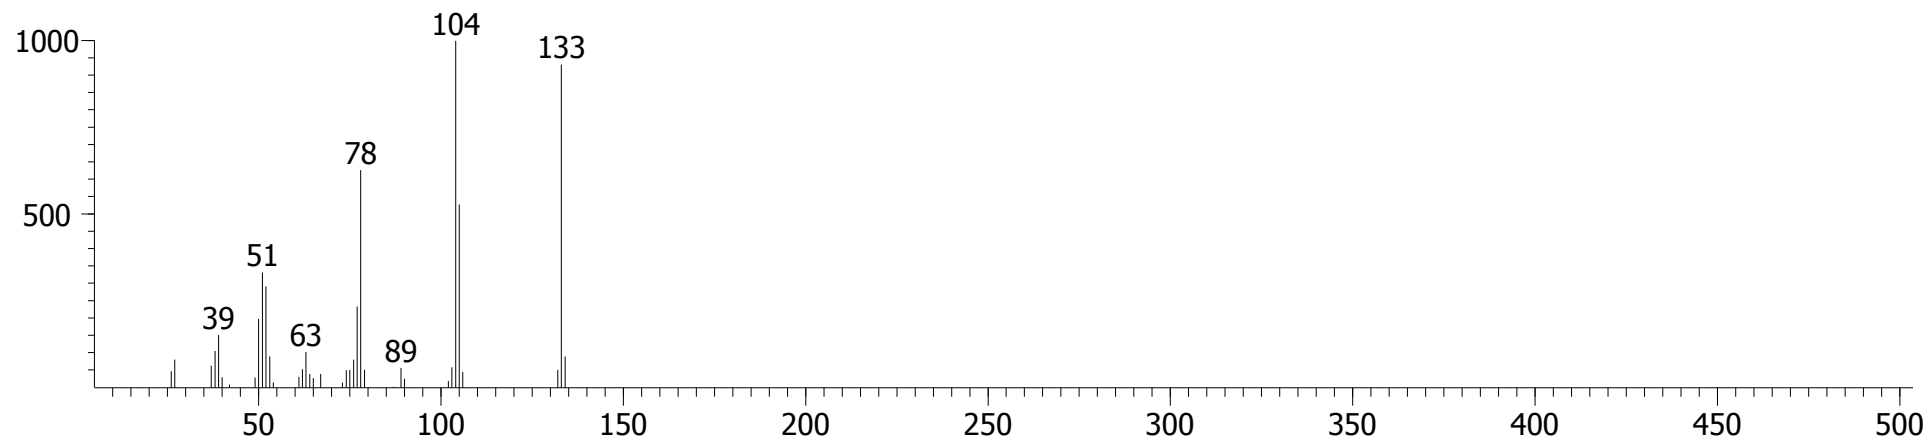

Sample 2, Fraction 3 (Water)

4-Chloroformanilide

(N-(4-Chlorophenyl)formamide)

CAS # = 2617-79-0  
1st Dimension R.T. = 1019.76  
2nd Dimension R.T. = 1.129  
Quant Mass(es) = 157  
S/N = 118.58  
Area = 23262  
Height = 1991.2



Peak True - sample "BM Water 2:1", peak 986, at 1019.76 , 1.129 sec , sec (Spec # 63771)

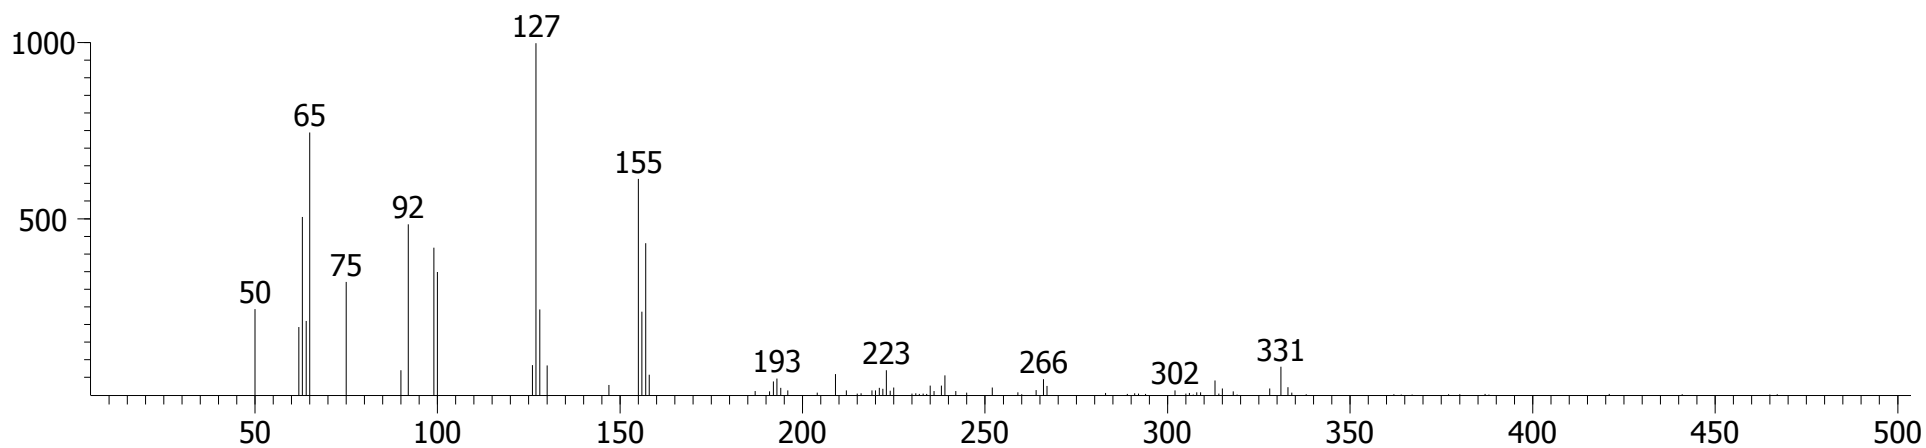

Library Hit - similarity 733, "4-Chloroformanilide"



Sample 2, Fraction 3 (Water)

Formamide, (2-acetylphenyl)-

CAS # = 0-00-0  
1st Dimension R.T. = 1065.23  
2nd Dimension R.T. = 1.135  
Quant Mass(es) = 163  
S/N = 3158.9  
Area = 118834  
Height = 19012

(N-(2-acetylphenyl)formamide)

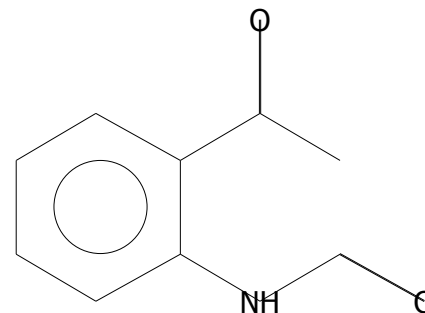

Peak True - sample "BM Water 2:1", peak 1134, at 1065.23 , 1.135 sec , sec (Spec # 70662)

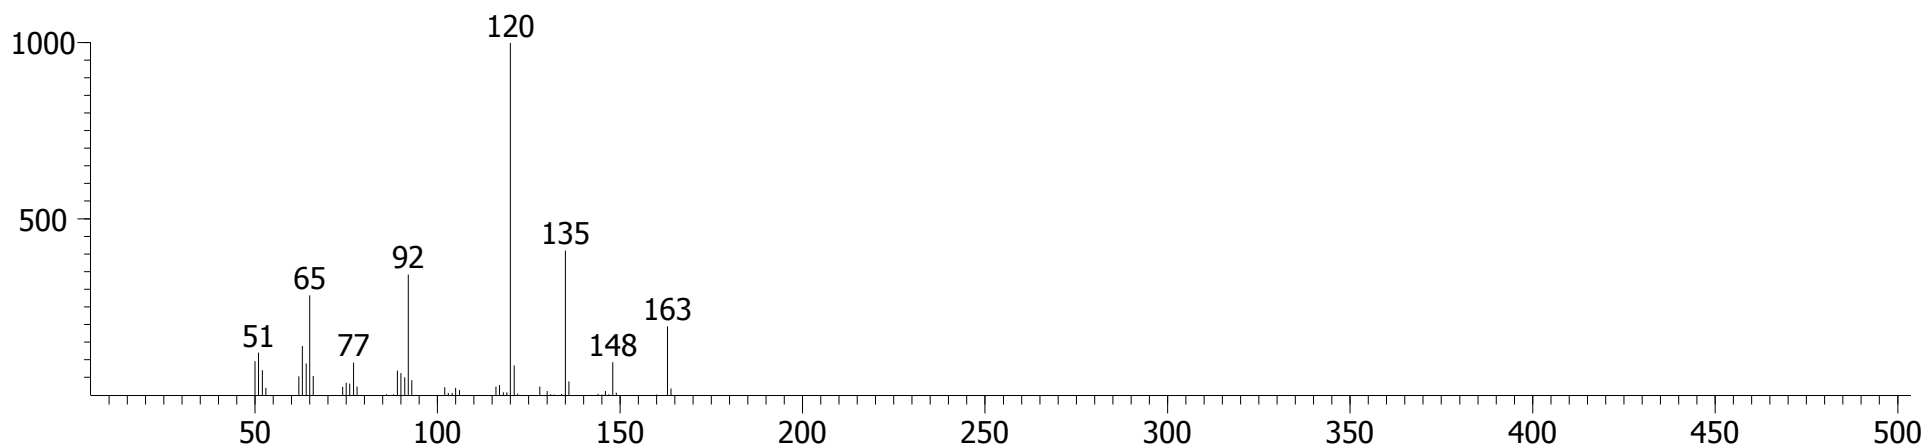

Library Hit - similarity 904, "Formamide, (2-acetylphenyl)-"

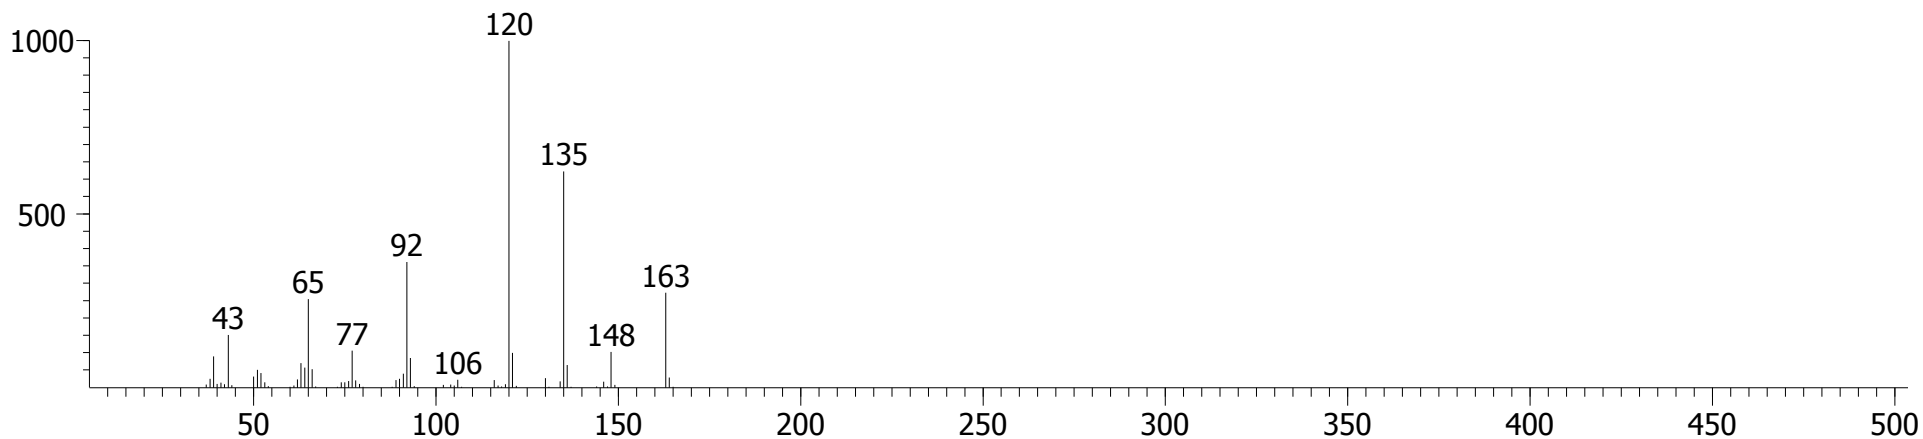

# Sample 2, Fraction 3 (Water)

## Benzophenone

CAS # = 119-61-9  
1st Dimension R.T. = 1086.22  
2nd Dimension R.T. = 1.069  
Quant Mass(es) = 182  
S/N = 602.68  
Area = 39211  
Height = 6996.0



Peak True - sample "BM Water 2:1", peak 1198, at 1086.22 , 1.069 sec , sec (Spec # 73832)

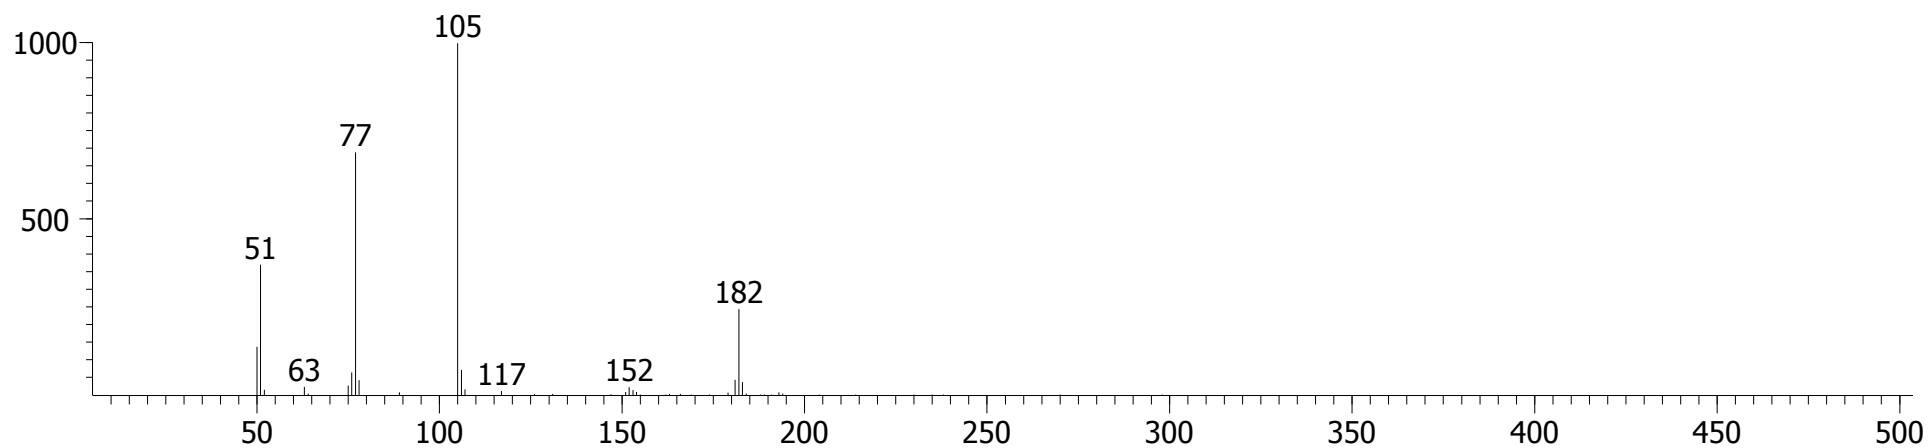

Library Hit - similarity 920, "Benzophenone"

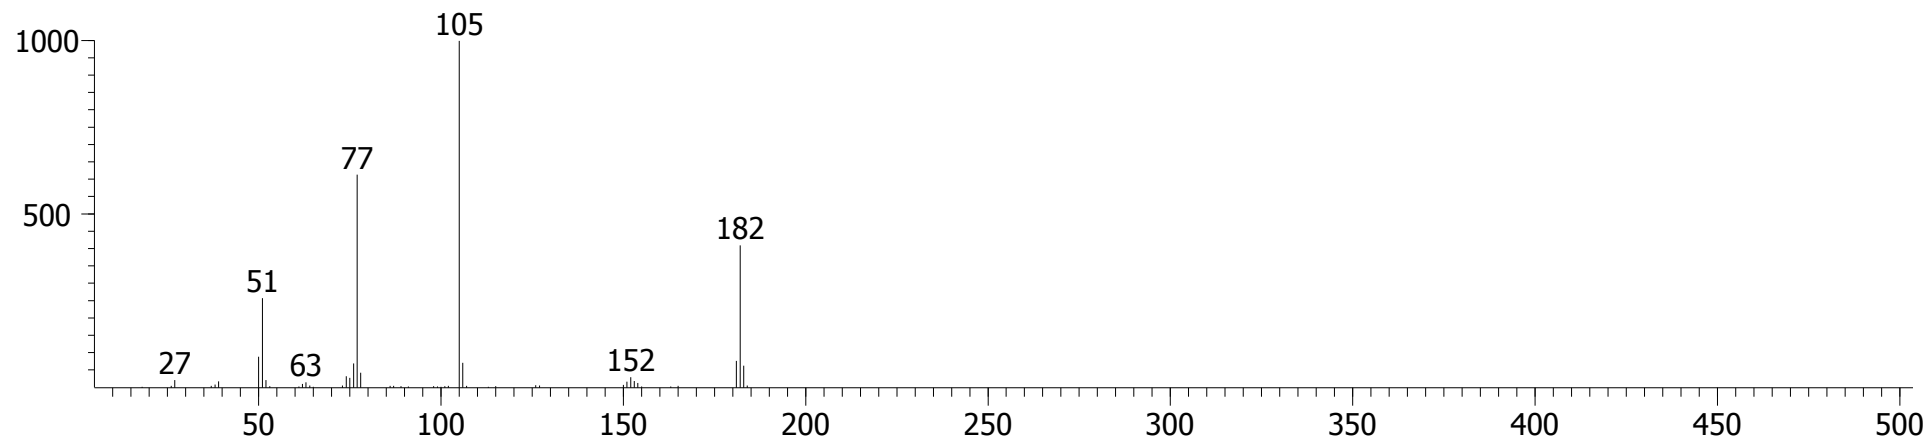



# Sample 2, Fraction 3 (Water)

## Acetaminophen

CAS # = 103-90-2  
1st Dimension R.T. = 1124.7  
2nd Dimension R.T. = 1.201  
Quant Mass(es) = 151  
S/N = 3118.8  
Area = 193573  
Height = 28223

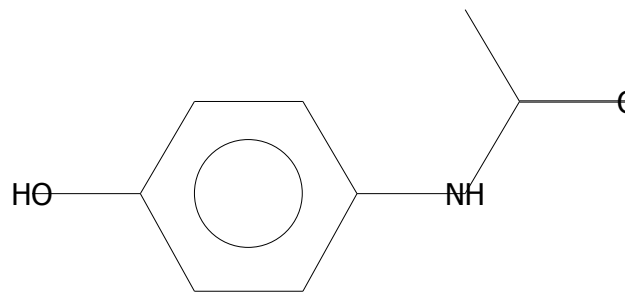

Peak True - sample "BM Water 2:1", peak 1312, at 1124.7 , 1.201 sec , sec (Spec # 79682)

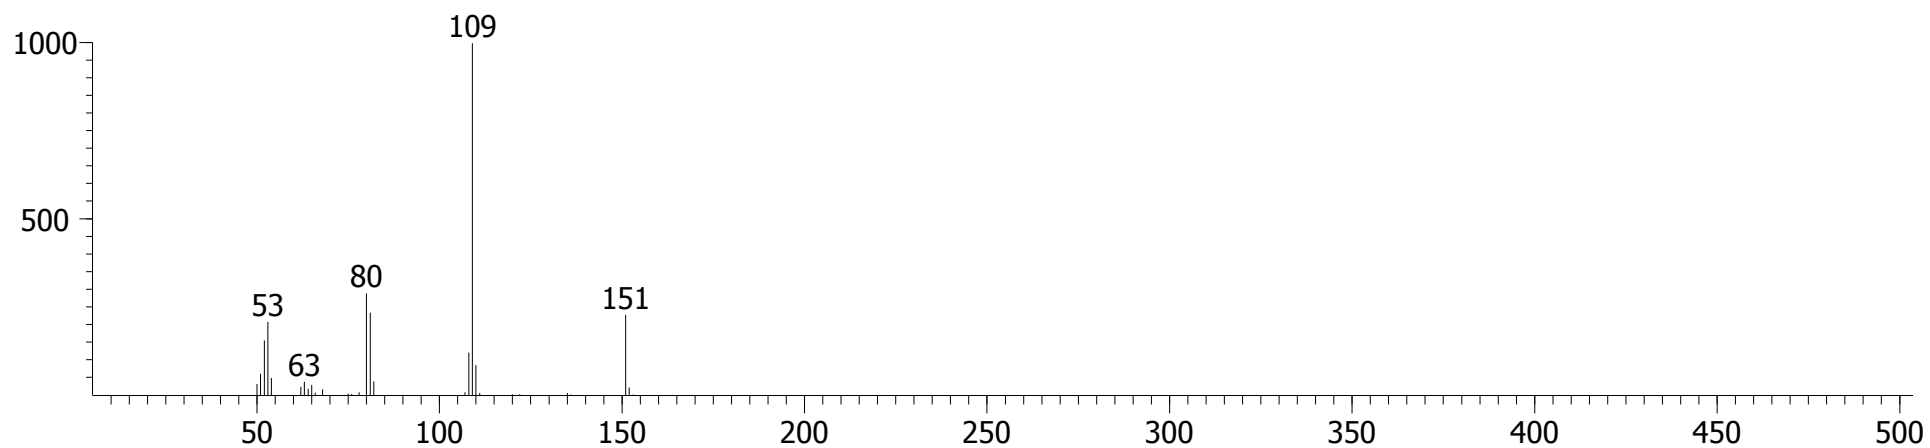

Library Hit - similarity 892, "Acetaminophen"

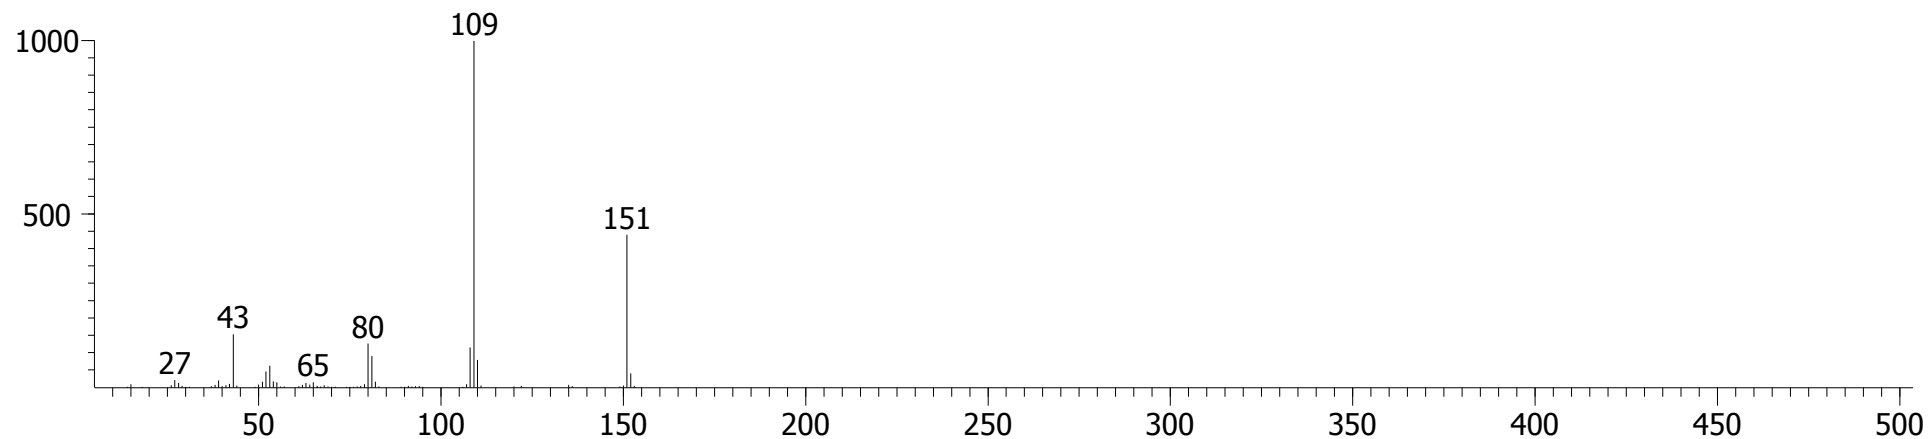

## Sample 2, Fraction 3 (Water)

### 3-Pyridinol, 6-methyl-, acetate (ester)

CAS # = 4842-89-1

1st Dimension R.T. = 1128.2

2nd Dimension R.T. = 1.214

Quant Mass(es) = 151

S/N = 6381.4

Area = 882024

Height = 114905

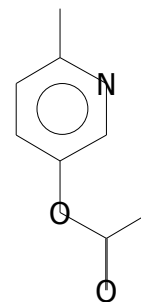

Peak True - sample "BM Water 2:1", peak 1326, at 1128.2 , 1.214 sec , sec (Spec # 80214)

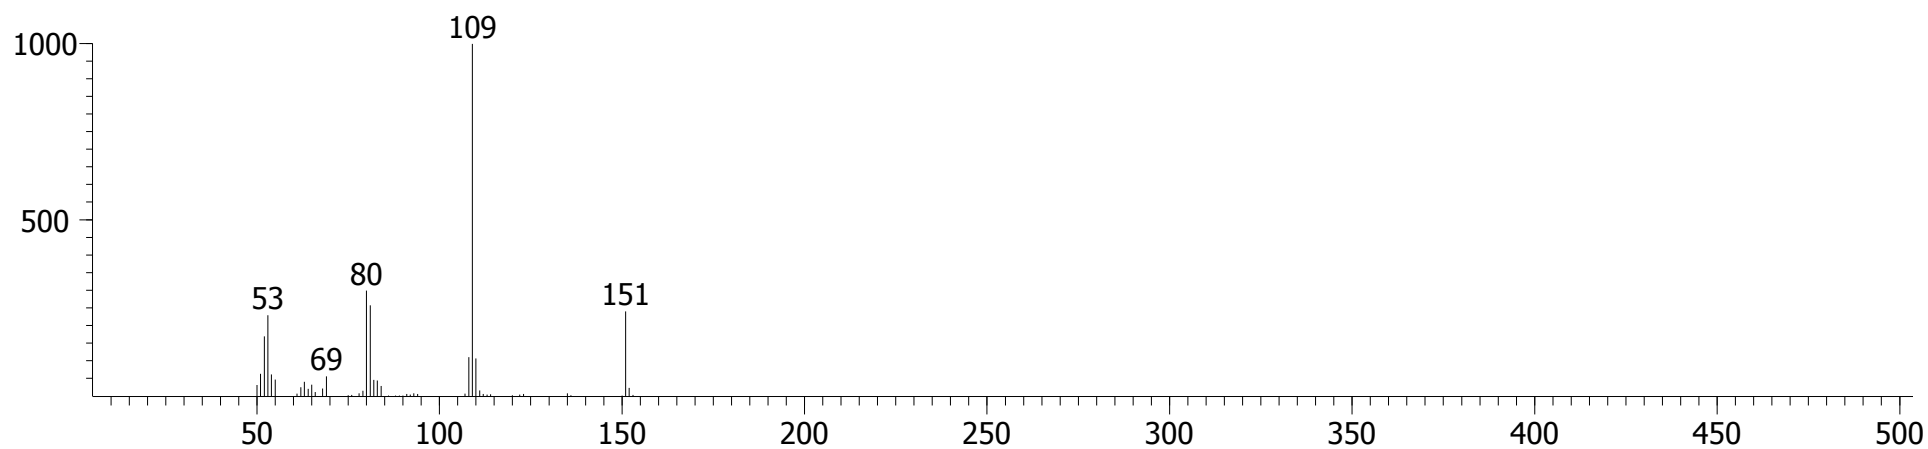

Library Hit - similarity 892, "3-Pyridinol, 6-methyl-, acetate (ester)"

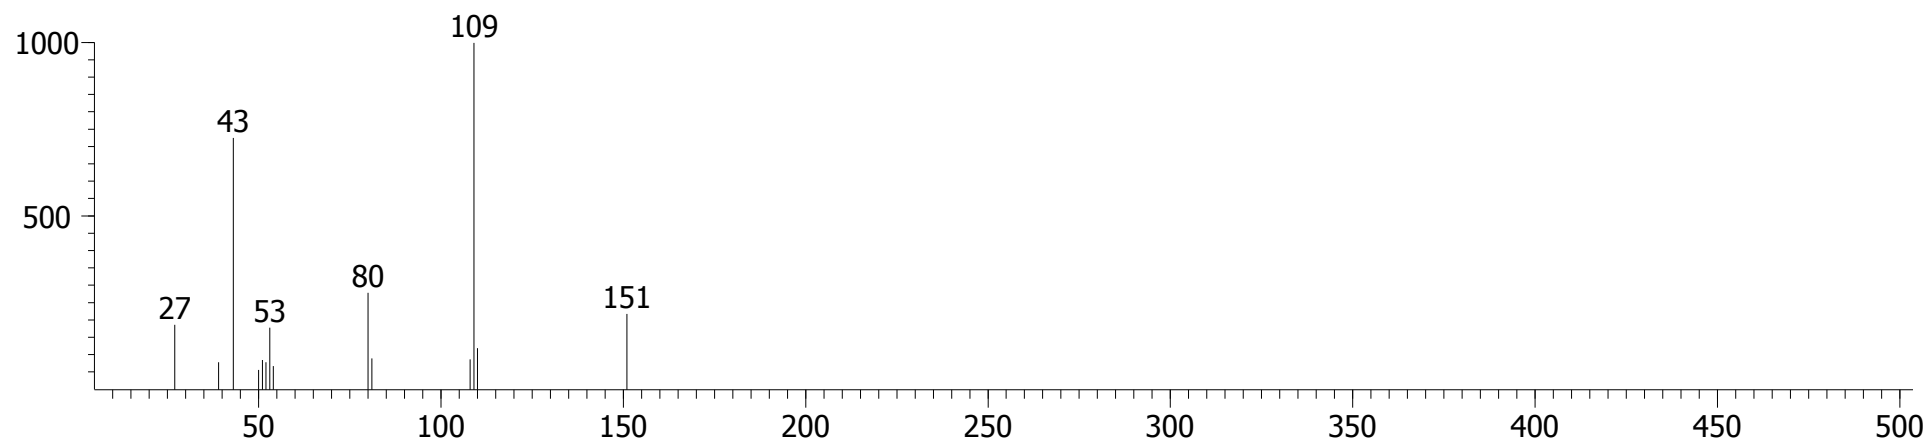

Sample 2, Fraction 3 (Water)

1H-Indole-2,3-dione

CAS # = 91-56-5  
1st Dimension R.T. = 1138.69  
2nd Dimension R.T. = 1.241  
Quant Mass(es) = 147  
S/N = 1345.5  
Area = 299952  
Height = 35159

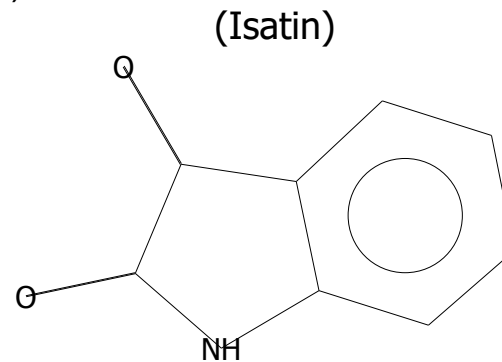

Peak True - sample "BM Water 2:1", peak 1364, at 1138.69 , 1.241 sec , sec (Spec # 81808)

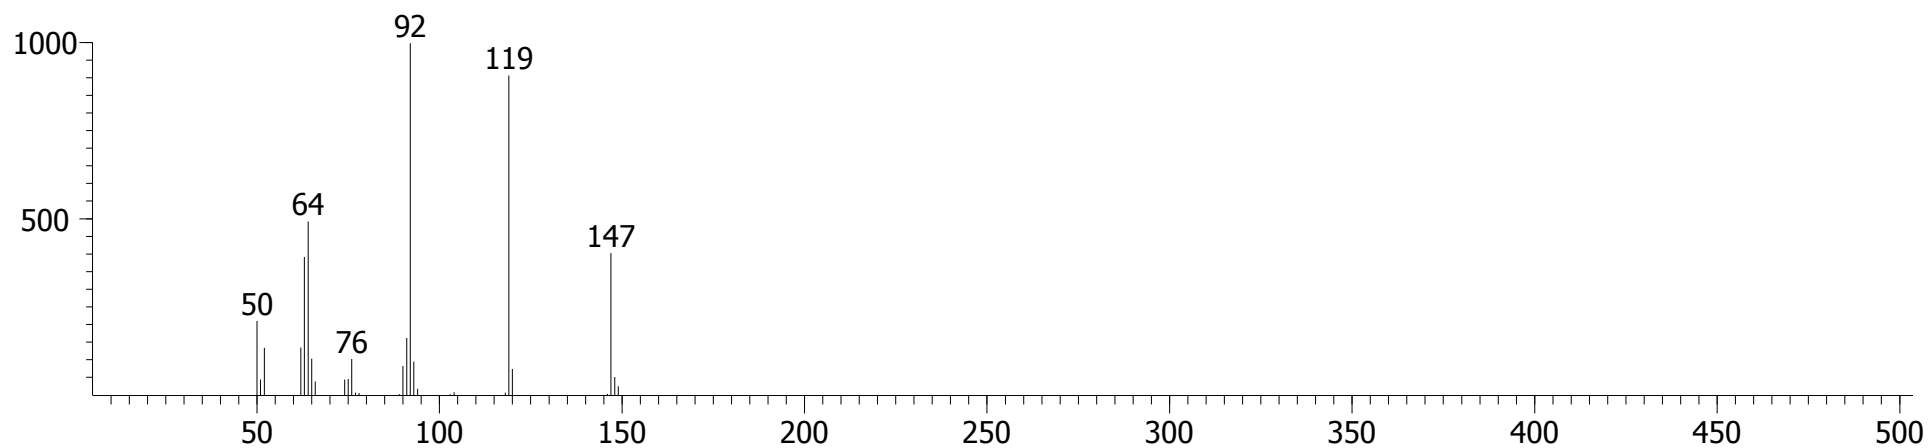

Library Hit - similarity 919, "1H-Indole-2,3-dione"

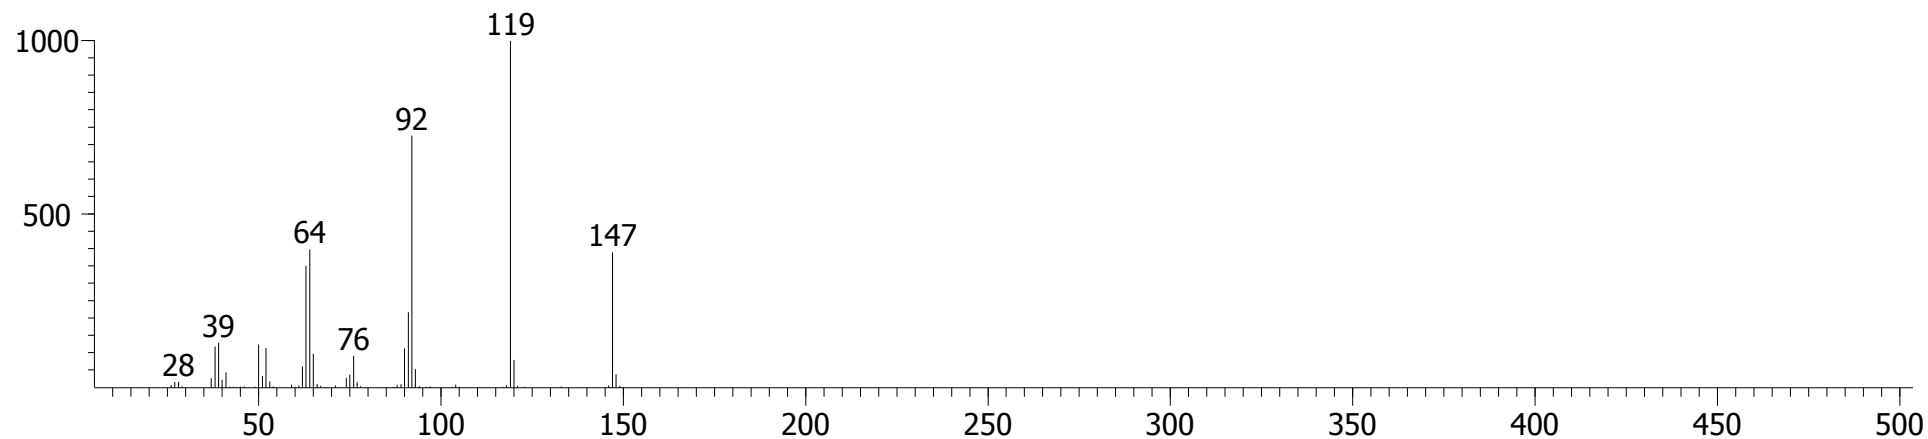

# Sample 2, Fraction 3 (Water)

## Indole-5-aldehyde

CAS # = 1196-69-6  
1st Dimension R.T. = 1205.15  
2nd Dimension R.T. = 1.294  
Quant Mass(es) = 144  
S/N = 666.08  
Area = 63309  
Height = 7899.0

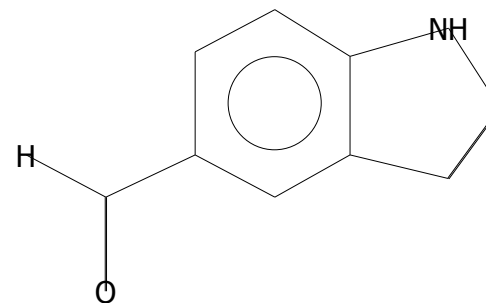

Peak True - sample "BM Water 2:1", peak 1615, at 1205.15 , 1.294 sec , sec (Spec # 91886)

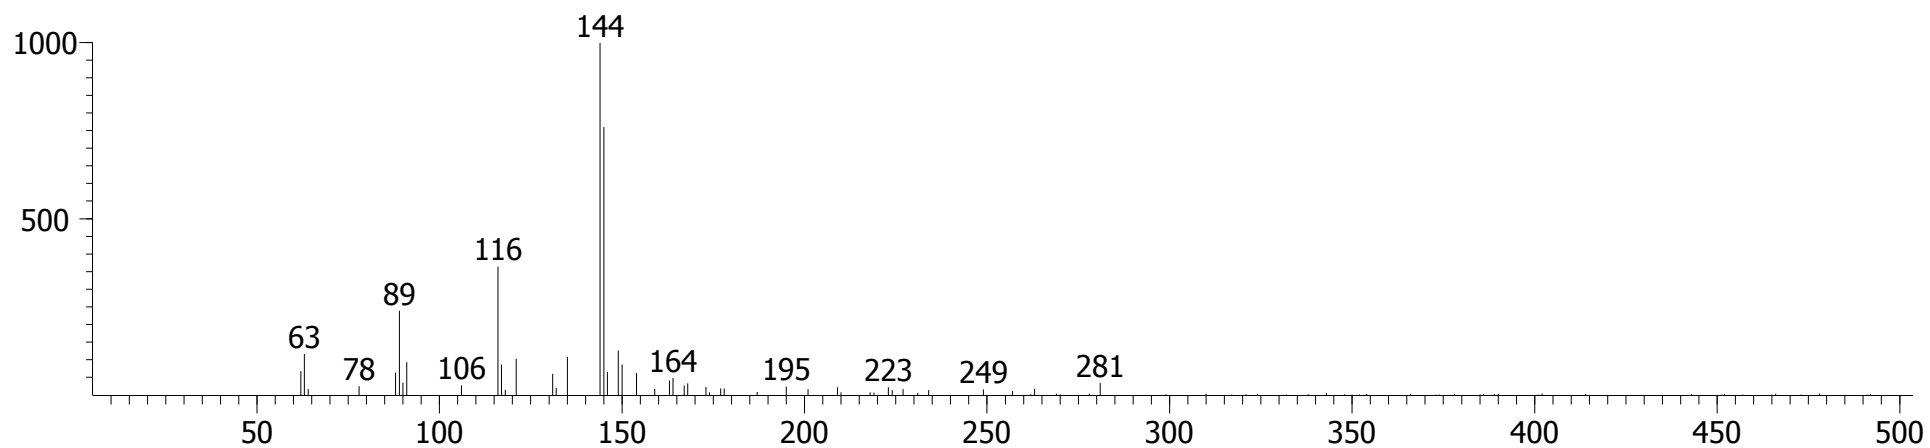

Library Hit - similarity 760, "Indole-5-aldehyde"

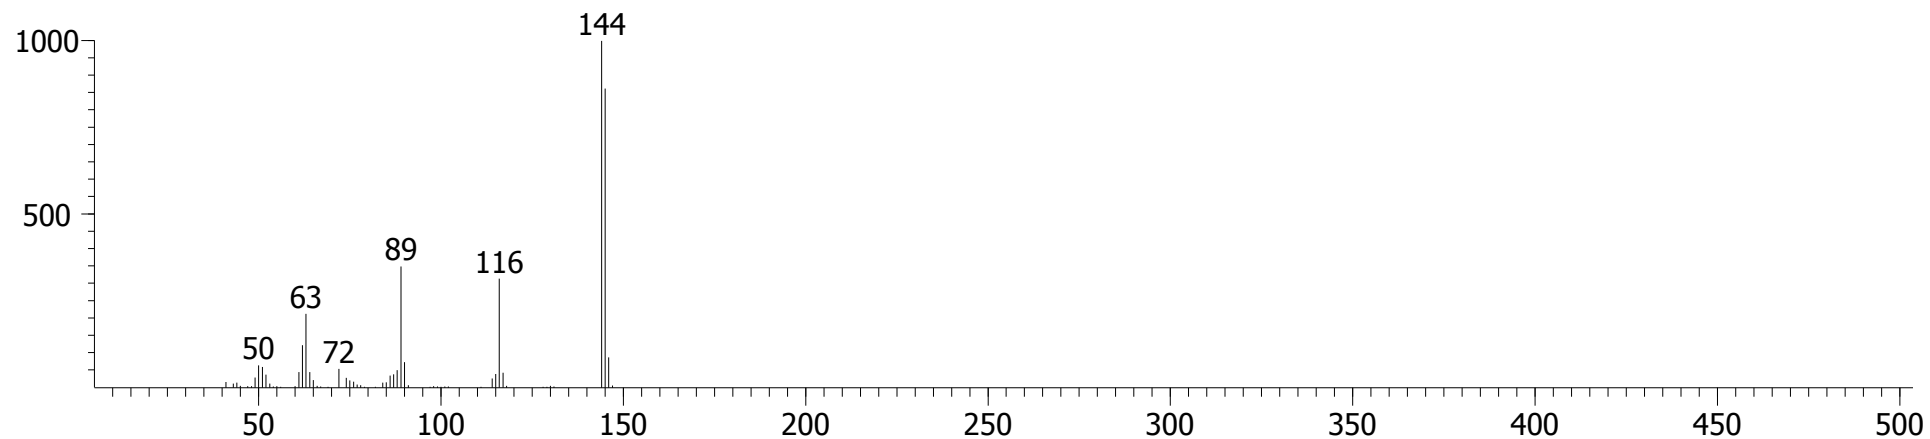

Sample 2, Fraction 3 (Water)

Acetamide,  
N-[4-hydroxy-3-(methylthio)phenyl]-

CAS # = 37398-23-5  
1st Dimension R.T. = 1257.62  
2nd Dimension R.T. = 1.241  
Quant Mass(es) = 197  
S/N = 2507.3  
Area = 143297  
Height = 13463

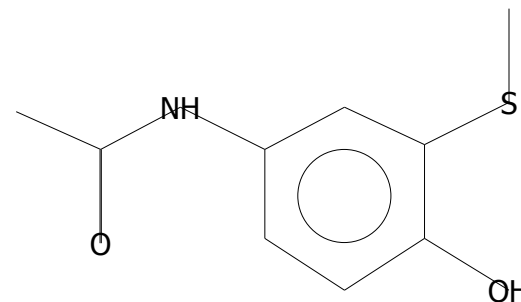

Peak True - sample "BM Water 2:1", peak 1847, at 1257.62 , 1.241 sec , sec (Spec # 99828)

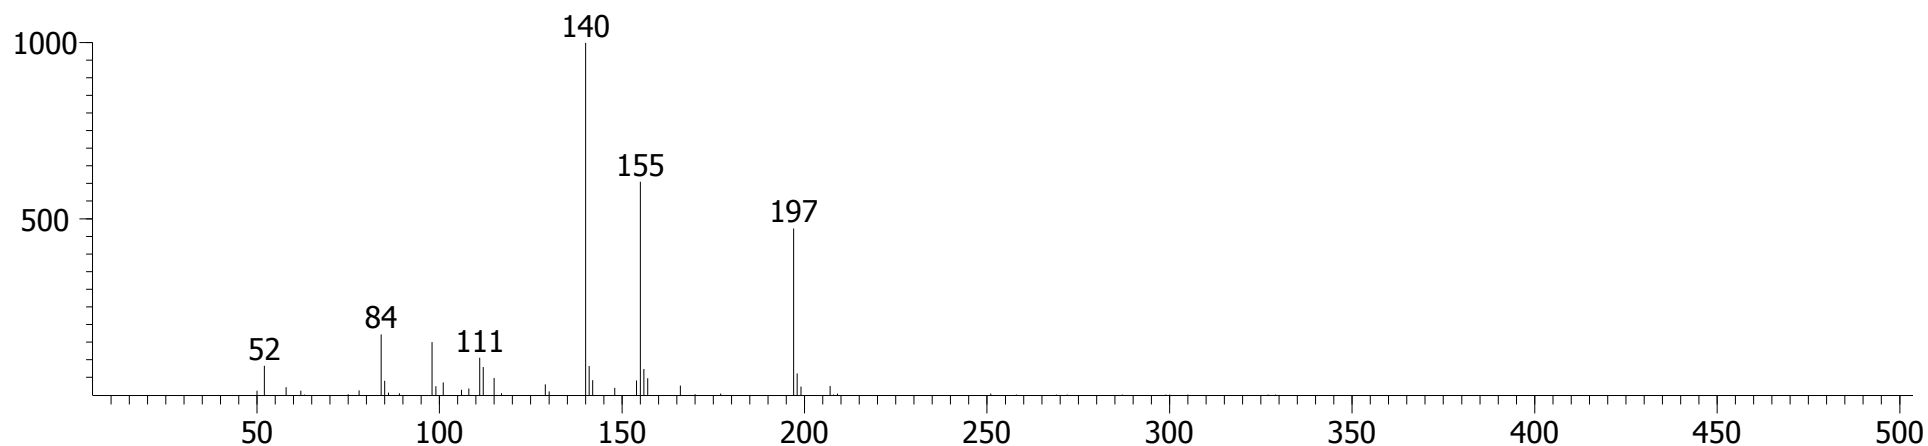

Library Hit - similarity 864, "Acetamide, N-[4-hydroxy-3-(methylthio)phenyl]-"

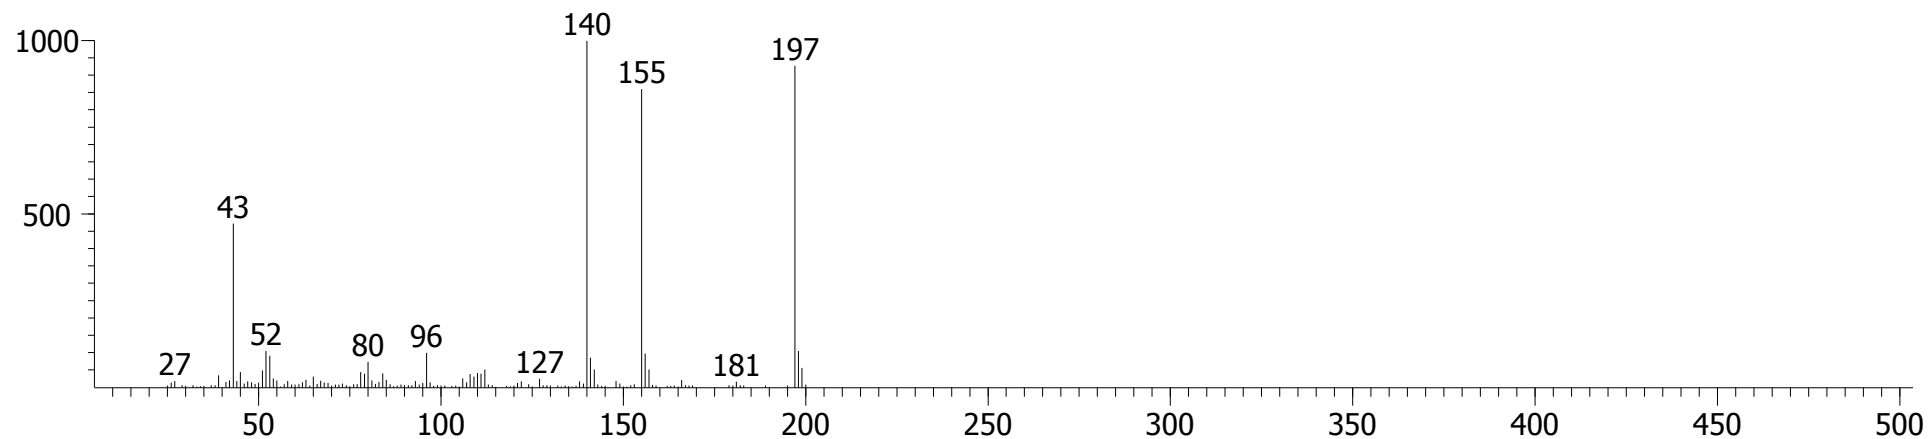

Sample 2, Fraction 3 (Water)

Pyrrolo[1,2-a]pyrazine-1,4-dione,  
hexahydro-3-(phenylmethyl)-

CAS # = 14705-60-3  
1st Dimension R.T. = 1498.99  
2nd Dimension R.T. = 1.419  
Quant Mass(es) = 244  
S/N = 49.167  
Area = 2599.7  
Height = 329.85



Peak True - sample "BM Water 2:1", peak 2996, at 1498.99 , 1.419 sec , sec (Spec # 136425)

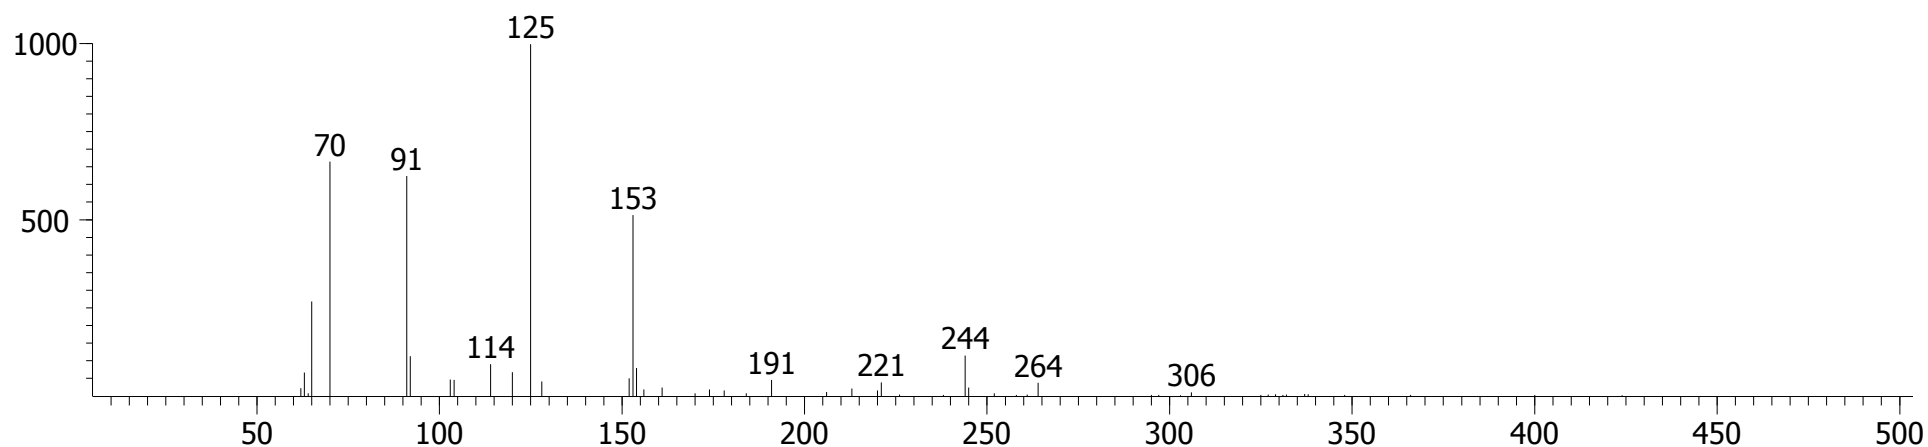

Library Hit - similarity 772, "Pyrrolo[1,2-a]pyrazine-1,4-dione, hexahydro-3-(phenylmethyl)-"

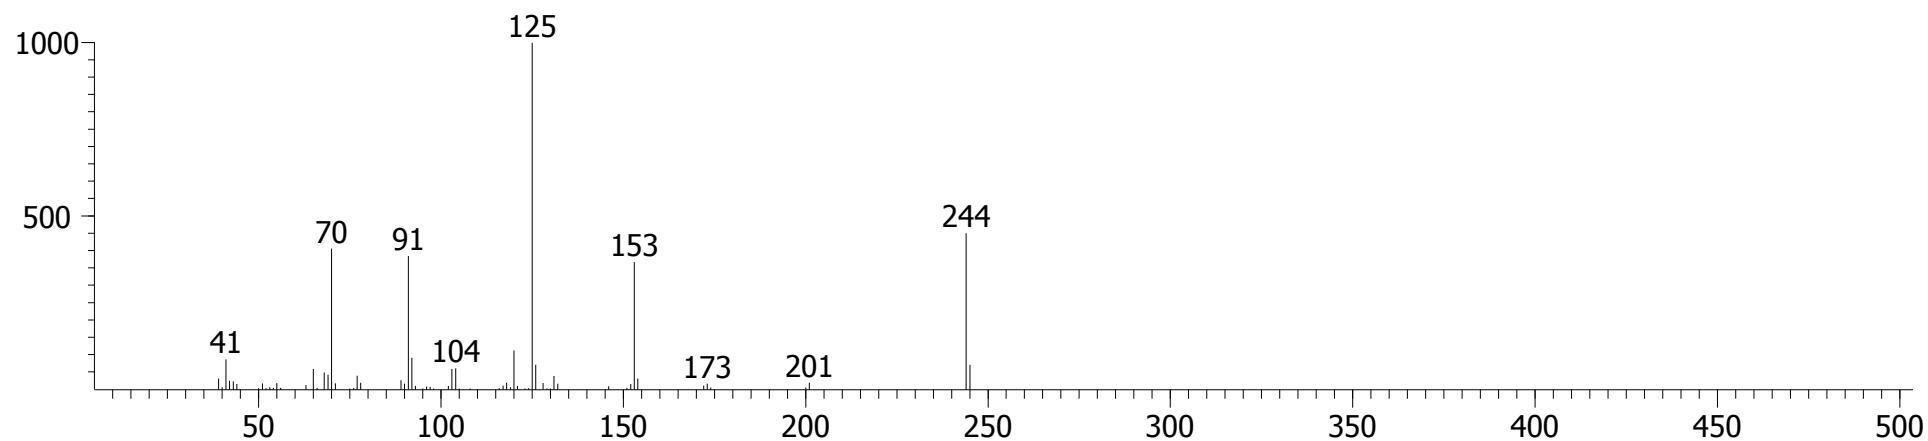

# Sample 2, Fraction 3 (Water)

## n-Octyl phenyl ketone

CAS # = 6008-36-2

1st Dimension R.T. = 1642.4

2nd Dimension R.T. = 1.267

Quant Mass(es) = 133

S/N = 156.89

Area = 6821.1

Height = 1288.7

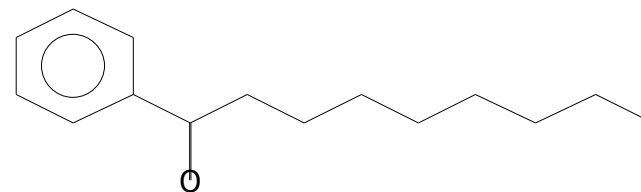

Peak True - sample "BM Water 2:1", peak 3585, at 1642.4 , 1.267 sec , sec (Spec # 158132)

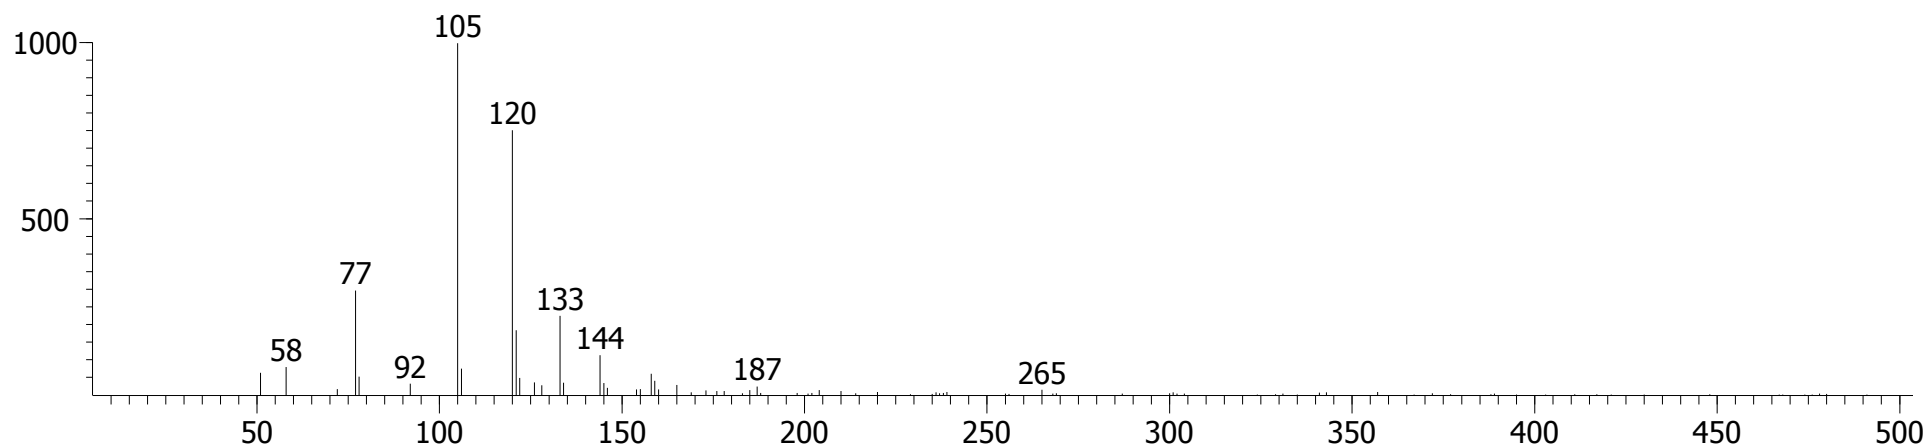

Library Hit - similarity 880, "n-Octyl phenyl ketone"

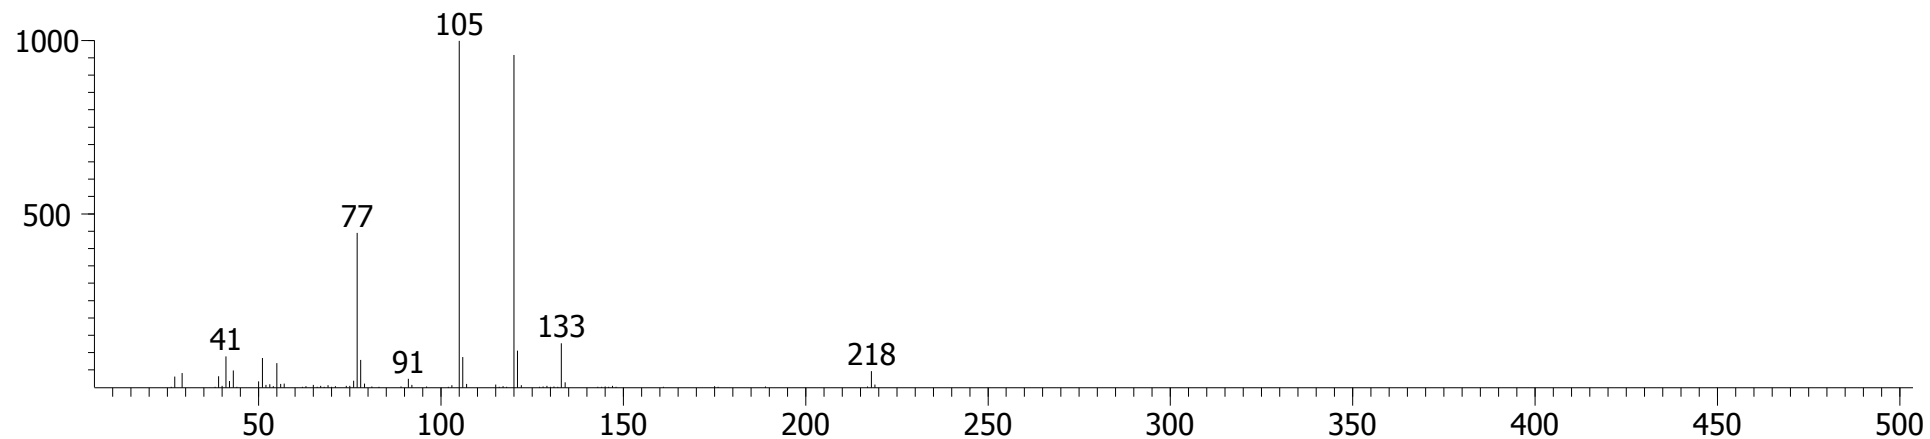

Sample 3, Fraction 1 (Hexane/DCM)

Naphthalene,

1,2,3,4-tetrahydro-5-methyl-

CAS # = 2809-64-5

1st Dimension R.T. = 806.382

2nd Dimension R.T. = 0.924

Quant Mass(es) = 146

S/N = 629.10

Area = 23393

Height = 4302.3



(5-Methyltetralin)

Peak True - sample "Lipid BM 3 F1:1", peak 403, at 806.382 , 0.924 sec , sec (Spec # 31410)

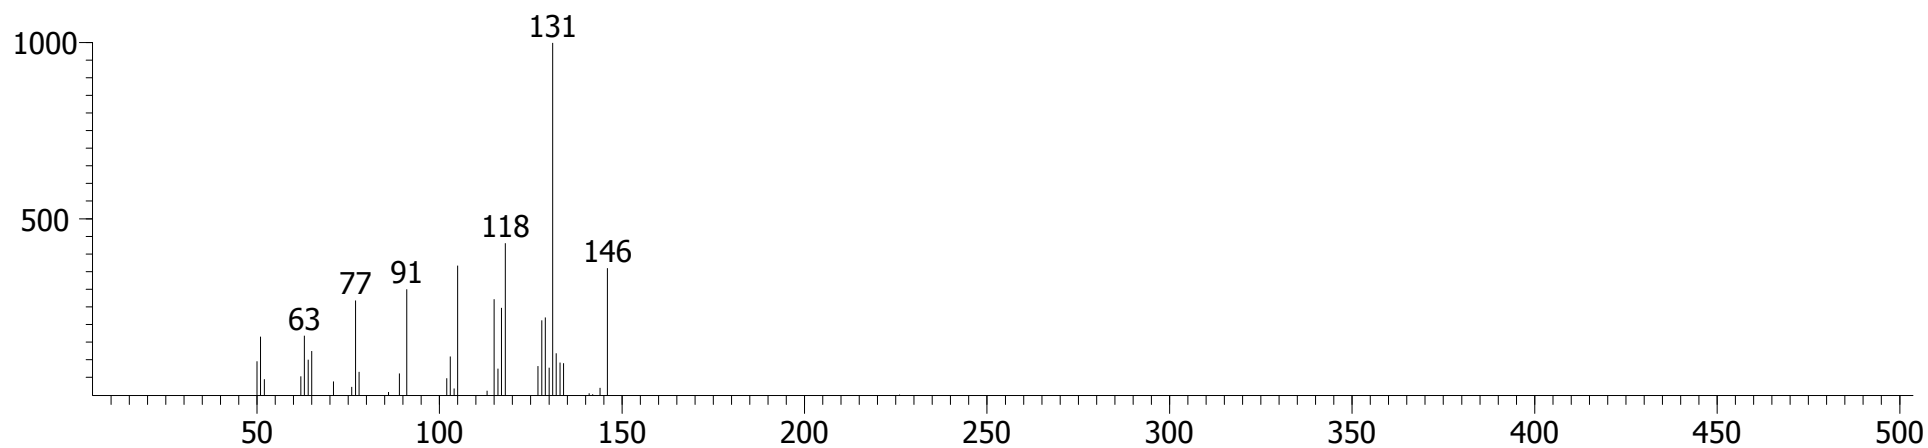

Library Hit - similarity 835, "Naphthalene, 1,2,3,4-tetrahydro-5-methyl-"





Sample 3, Fraction 1 (Hexane/DCM)

Benzene, 1-chloro-4-(methylthio)-

CAS # = 123-09-1  
1st Dimension R.T. = 809.88  
2nd Dimension R.T. = 0.970  
Quant Mass(es) = 158  
S/N = 2693.0  
Area = 150678  
Height = 32614



(4-Chlorothioanisole)

Peak True - sample "Lipid BM 3 F1:1", peak 415, at 809.88 , 0.970 sec , sec (Spec # 31947)

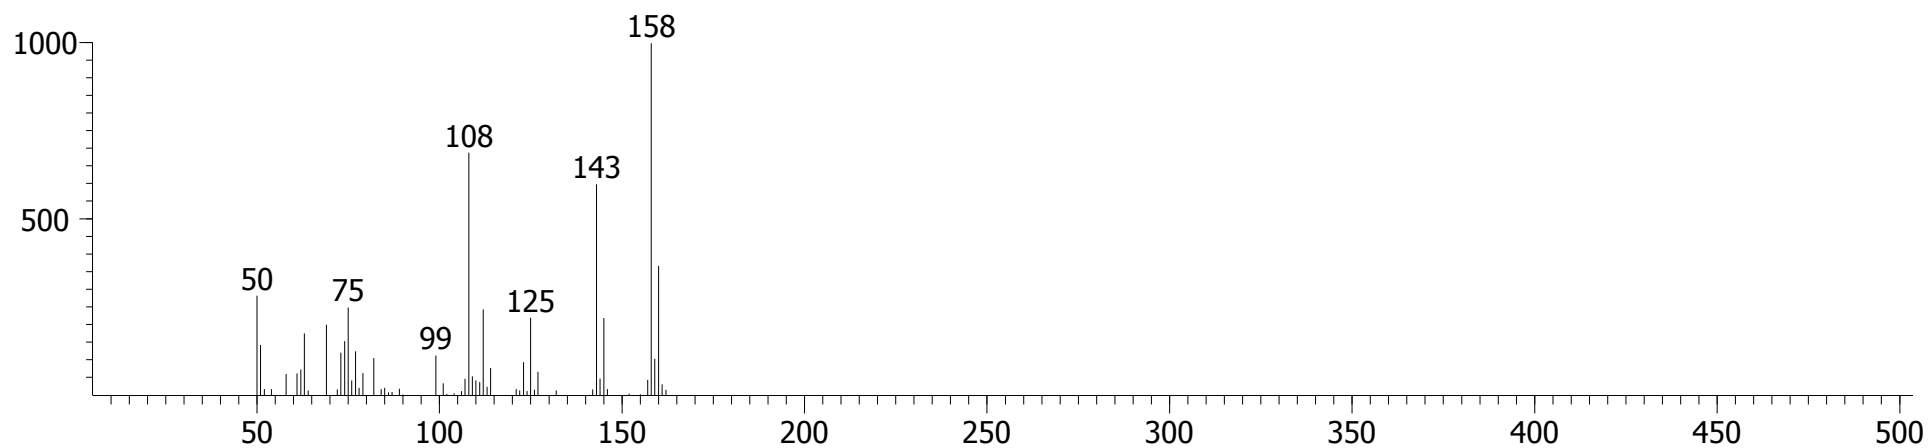

Library Hit - similarity 934, "Benzene, 1-chloro-4-(methylthio)-"



Sample 3, Fraction 1 (Hexane/DCM)

Anethole

CAS # = 104-46-1  
1st Dimension R.T. = 816.876  
2nd Dimension R.T. = 0.944  
Quant Mass(es) = 148  
S/N = 210.76  
Area = 23695  
Height = 3307.0

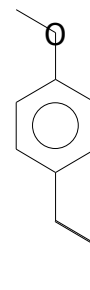

Peak True - sample "Lipid BM 3 F1:1", peak 429, at 816.876 , 0.944 sec , sec (Spec # 33003)

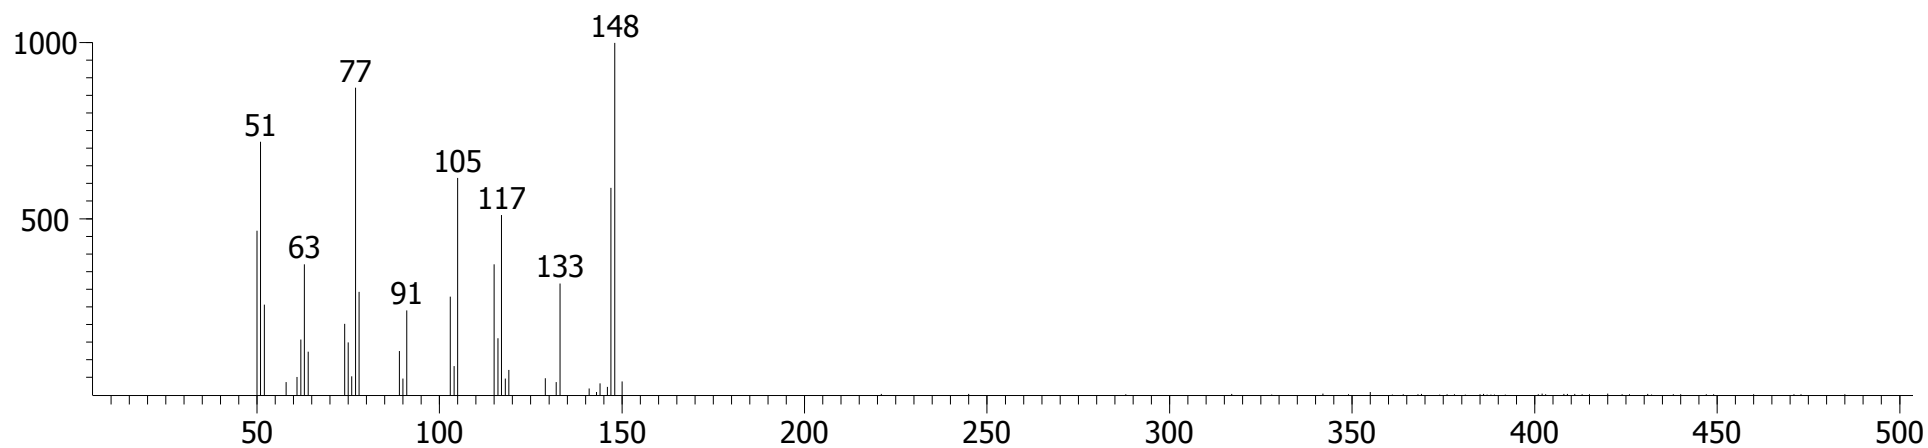

Library Hit - similarity 846, "Anethole"

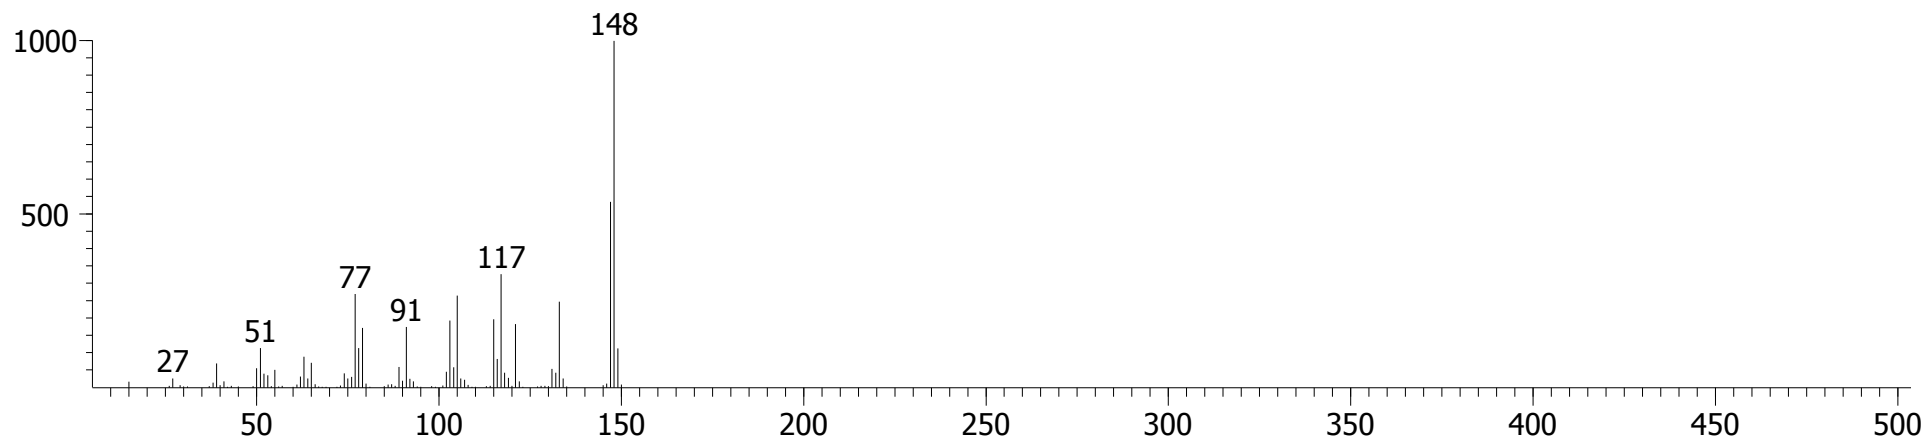

Sample 3, Fraction 1 (Hexane/DCM)

Benzene,  
1-methyl-2-(1-methyl-2-propenyl)-

CAS # = 97664-19-2  
1st Dimension R.T. = 820.374  
2nd Dimension R.T. = 0.937  
Quant Mass(es) = 146  
S/N = 213.64  
Area = 6811.4  
Height = 925.29

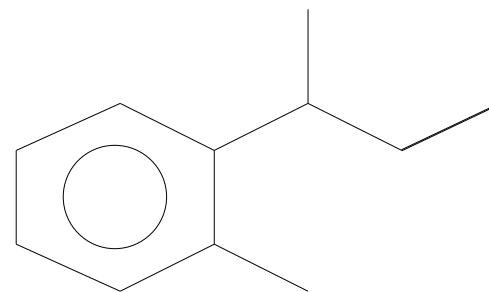

Peak True - sample "Lipid BM 3 F1:1", peak 437, at 820.374 , 0.937 sec , sec (Spec # 33532)

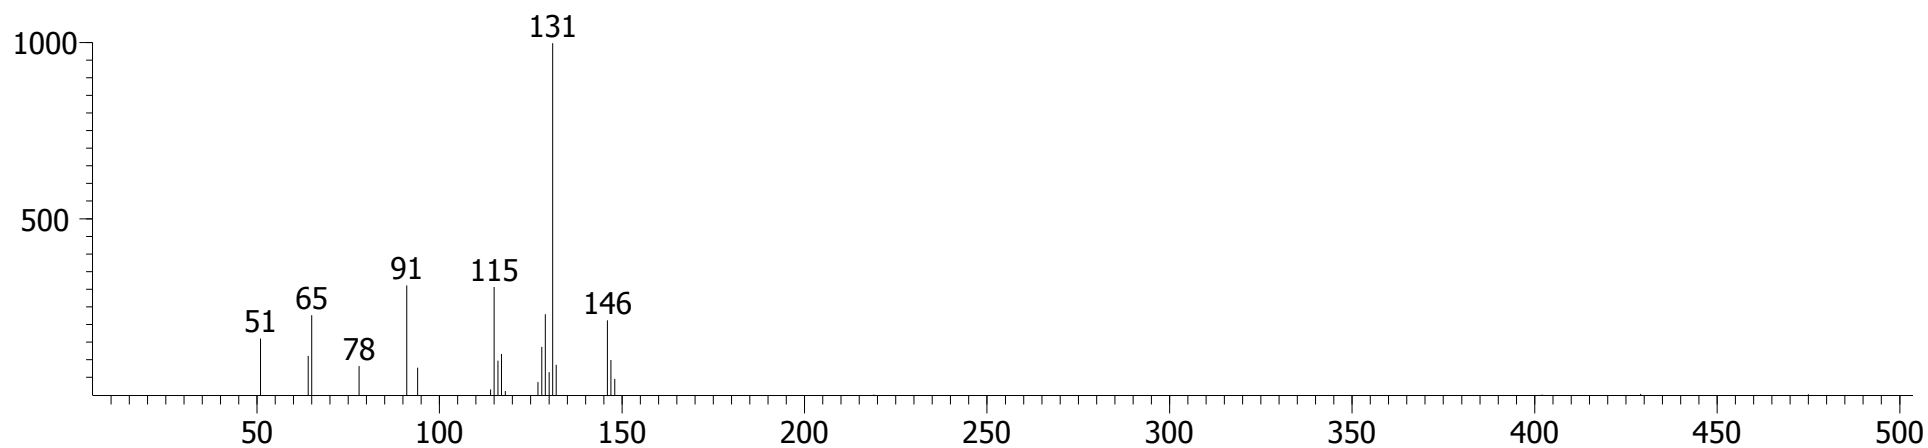

Library Hit - similarity 838, "Benzene, 1-methyl-2-(1-methyl-2-propenyl)-"

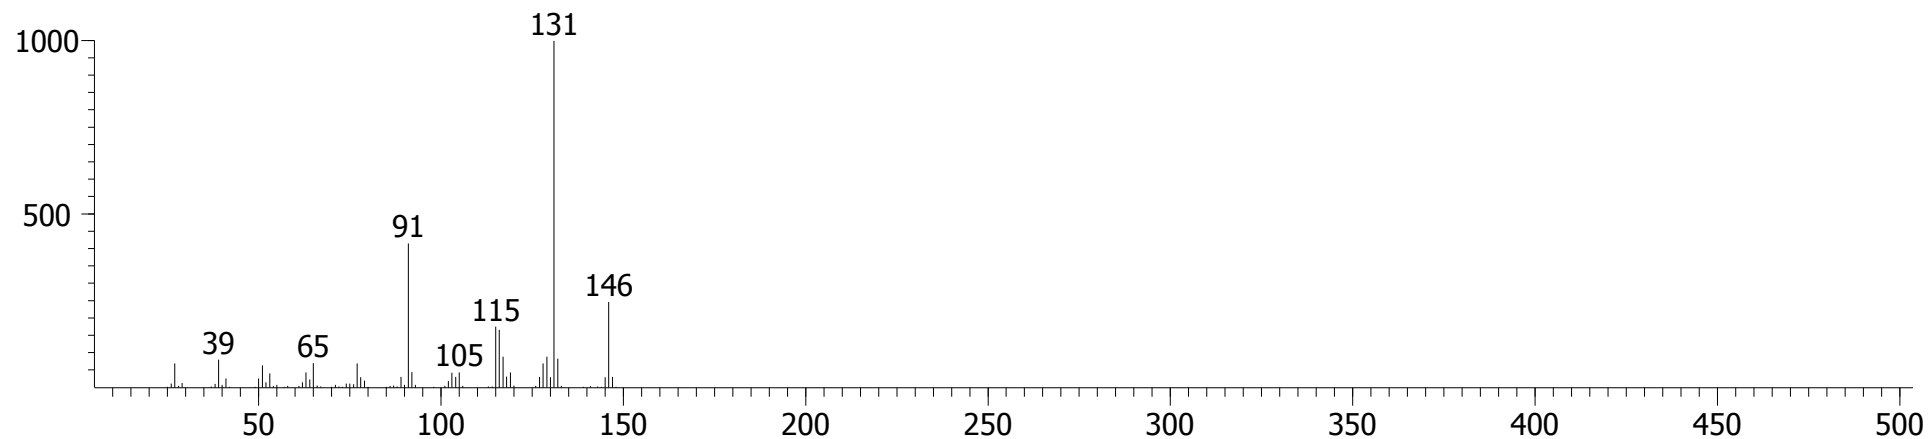

Sample 3, Fraction 1 (Hexane/DCM)

Phenol, p-tert-butyl-

CAS # = 98-54-4  
1st Dimension R.T. = 820.374  
2nd Dimension R.T. = 0.950  
Quant Mass(es) = 150  
S/N = 73.061  
Area = 6208.6  
Height = 949.71

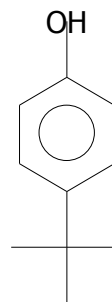

Peak True - sample "Lipid BM 3 F1:1", peak 438, at 820.374 , 0.950 sec , sec (Spec # 33534)

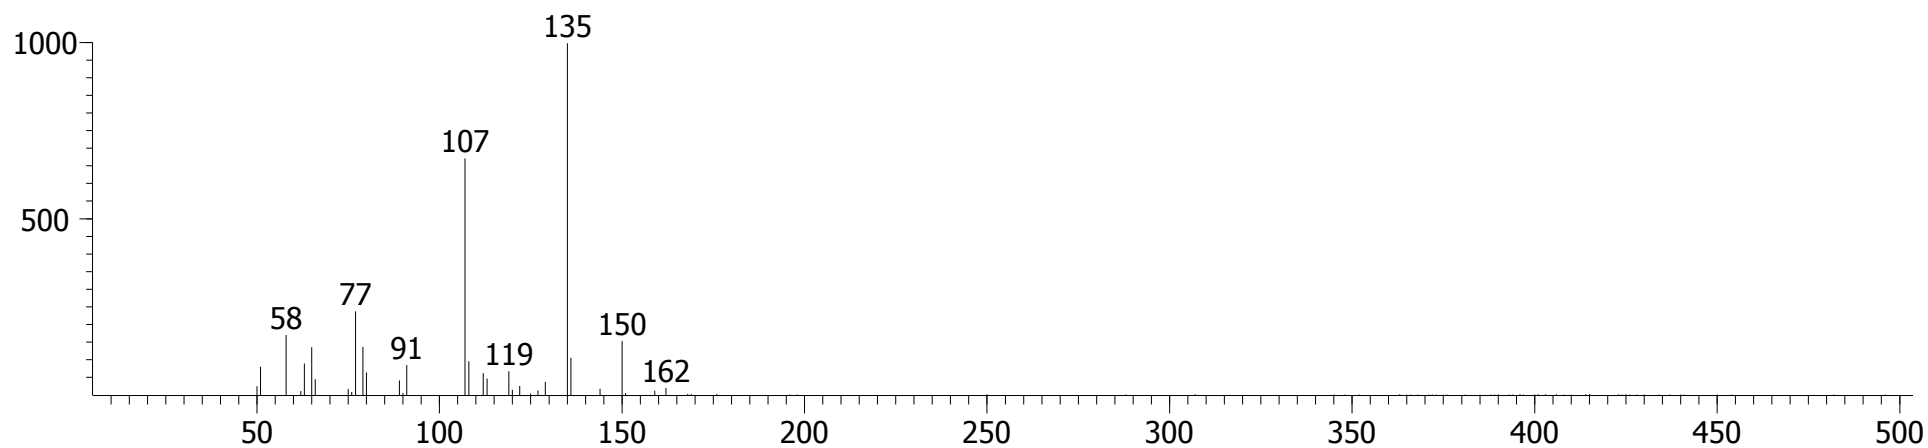

Library Hit - similarity 806, "Phenol, p-tert-butyl-"

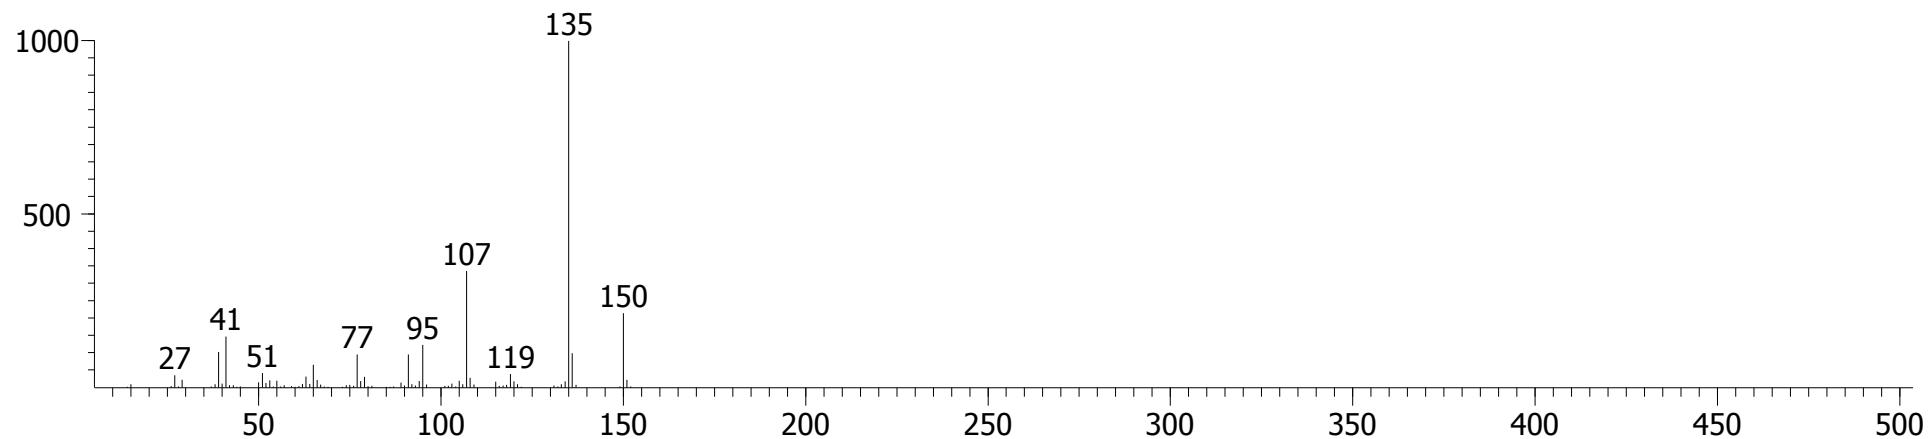

Sample 3, Fraction 1 (Hexane/DCM)

1H-Inden-1-one, 2,3-dihydro-

CAS # = 83-33-0  
1st Dimension R.T. = 823.872  
2nd Dimension R.T. = 1.036  
Quant Mass(es) = 132  
S/N = 176.65  
Area = 13515  
Height = 2571.9



Peak True - sample "Lipid BM 3 F1:1", peak 450, at 823.872 , 1.036 sec , sec (Spec # 34077)

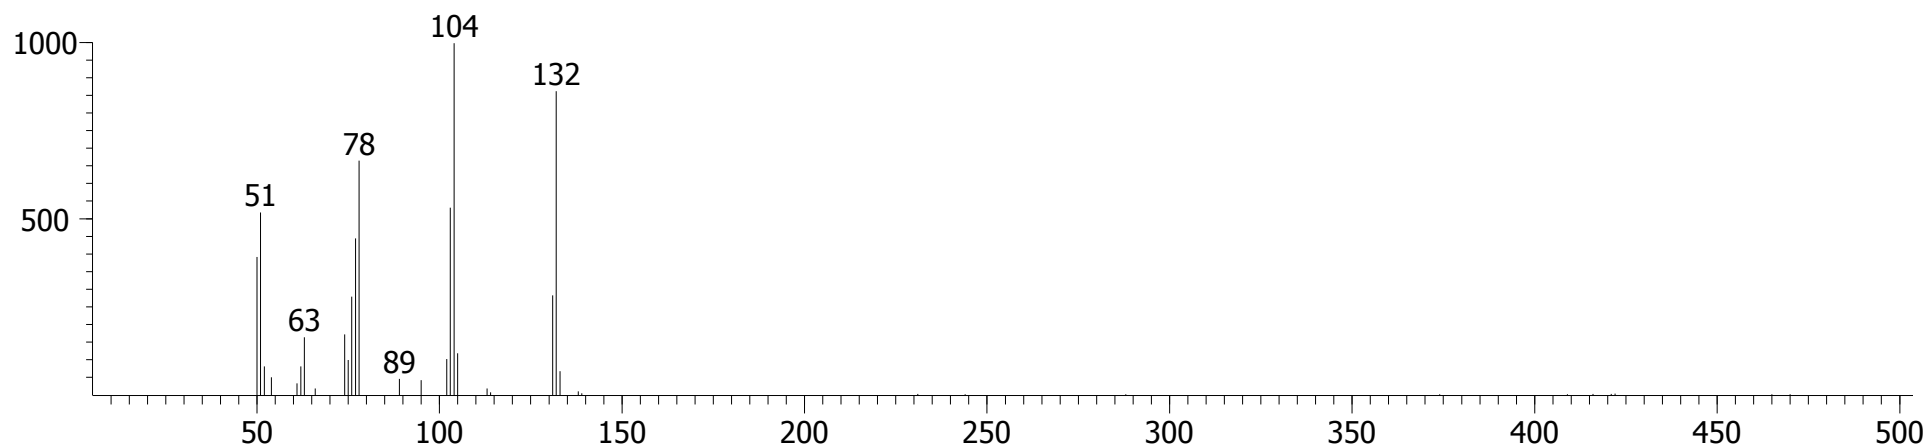

Library Hit - similarity 928, "1H-Inden-1-one, 2,3-dihydro-"



Sample 3, Fraction 1 (Hexane/DCM)

Benzenamine, 4-chloro-N-methyl-

CAS # = 932-96-7  
1st Dimension R.T. = 827.37  
2nd Dimension R.T. = 0.997  
Quant Mass(es) = 140  
S/N = 12467  
Area = 1200603  
Height = 219543



(4-Chloro-N-methylaniline)

Peak True - sample "Lipid BM 3 F1:1", peak 456, at 827.37 , 0.997 sec , sec (Spec # 34601)

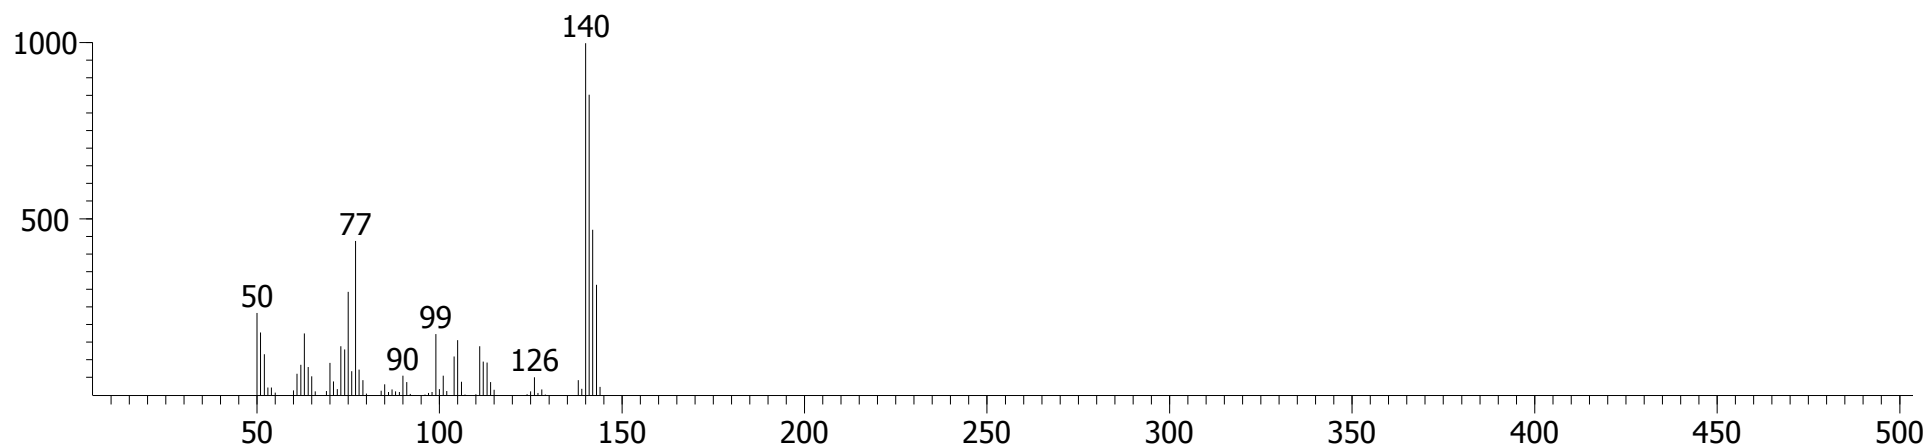

Library Hit - similarity 916, "Benzenamine, 4-chloro-N-methyl-"



Sample 3, Fraction 1 (Hexane/DCM)

Naphthalene,

1,2,3,4-tetrahydro-5-methyl-

CAS # = 2809-64-5

1st Dimension R.T. = 830.868

2nd Dimension R.T. = 0.950

Quant Mass(es) = 146

S/N = 258.88

Area = 20780

Height = 3727.2



(5-Methyltetralin)

Peak True - sample "Lipid BM 3 F1:1", peak 463, at 830.868 , 0.950 sec , sec (Spec # 35124)

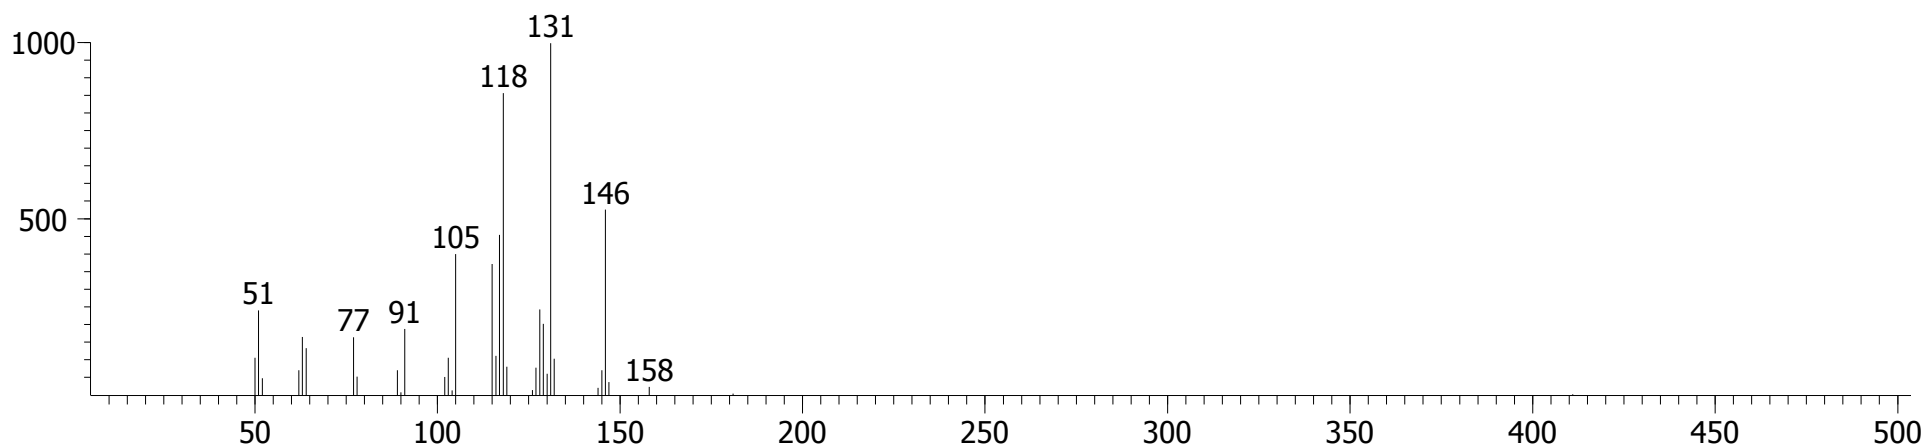

Library Hit - similarity 888, "Naphthalene, 1,2,3,4-tetrahydro-5-methyl-"



Sample 3, Fraction 1 (Hexane/DCM)

5H-1-Pyridine

CAS # = 270-91-7  
1st Dimension R.T. = 830.868  
2nd Dimension R.T. = 1.063  
Quant Mass(es) = 117  
S/N = 670.96  
Area = 76776  
Height = 14217



Peak True - sample "Lipid BM 3 F1:1", peak 464, at 830.868 , 1.063 sec , sec (Spec # 35141)

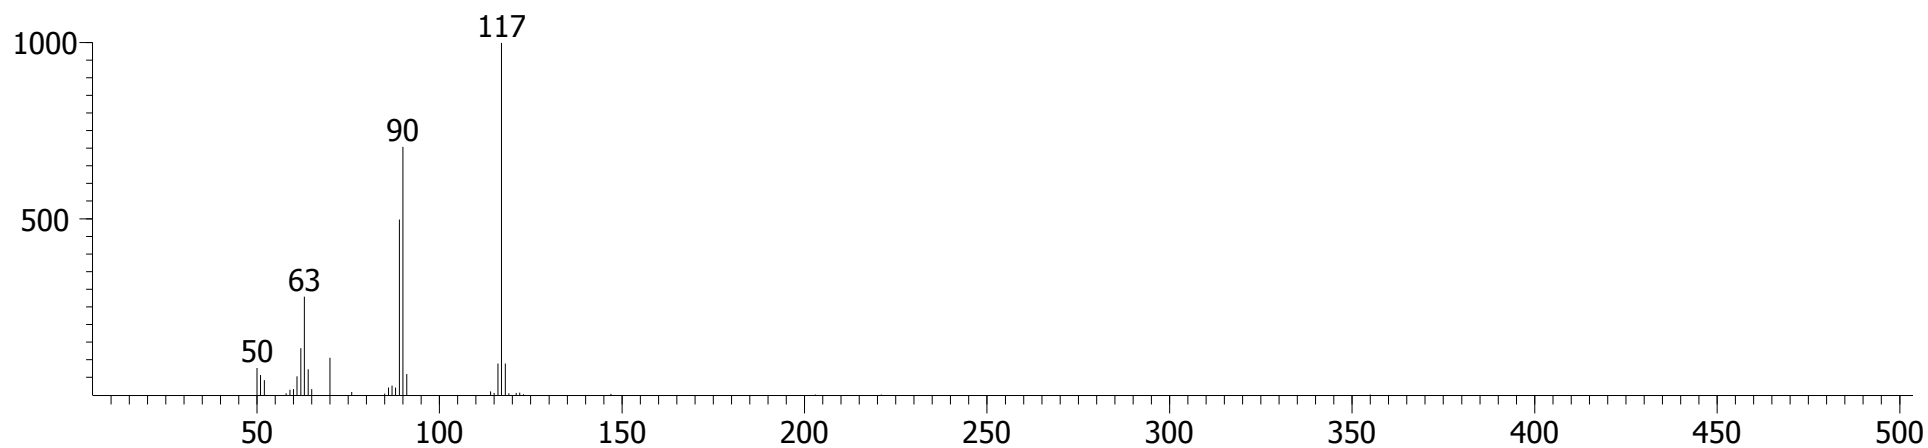

Library Hit - similarity 935, "5H-1-Pyridine"

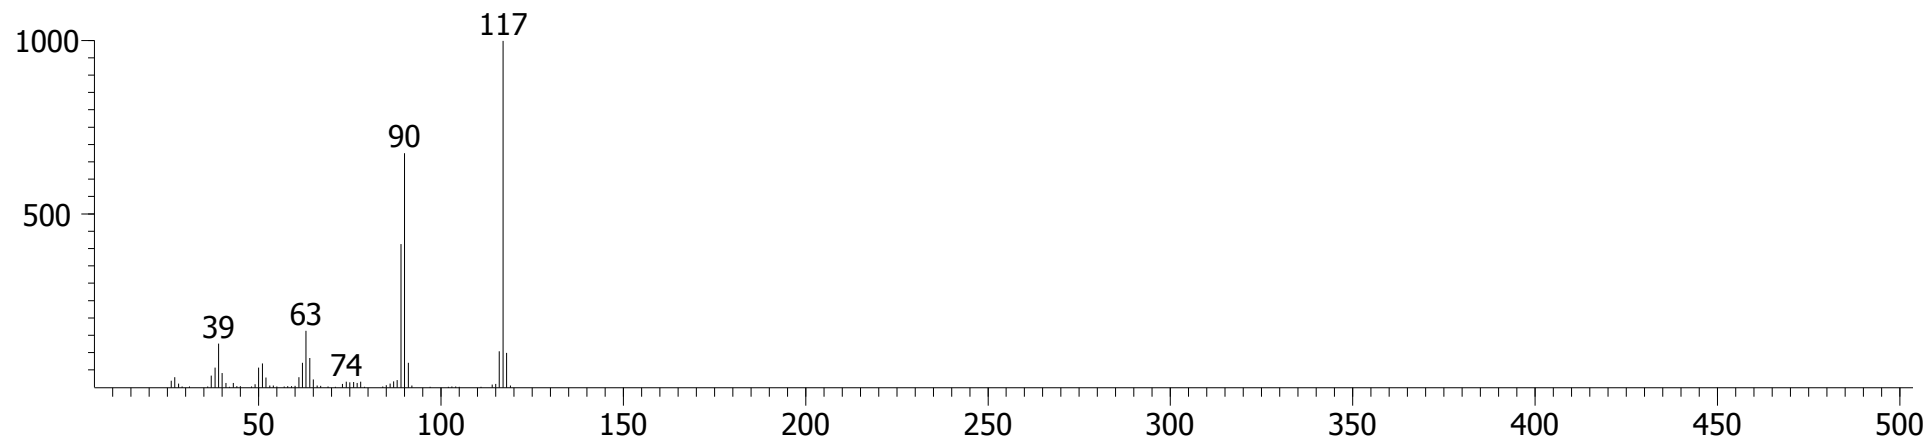



Sample 3, Fraction 1 (Hexane/DCM)

Acetamide, N-methyl-N-phenyl-

CAS # = 579-10-2  
1st Dimension R.T. = 834.366  
2nd Dimension R.T. = 1.003  
Quant Mass(es) = 149  
S/N = 1580.4  
Area = 38700  
Height = 7312.4



Peak True - sample "Lipid BM 3 F1:1", peak 470, at 834.366 , 1.003 sec , sec (Spec # 35662)

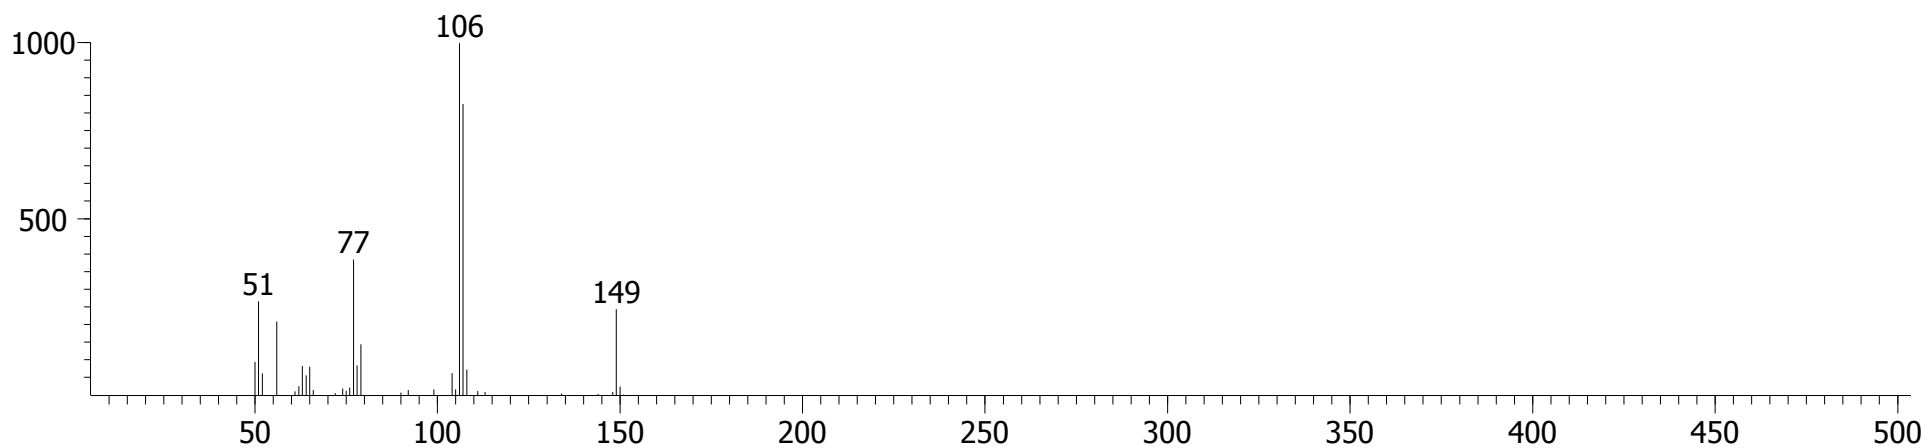

Library Hit - similarity 909, "Acetamide, N-methyl-N-phenyl-"



Sample 3, Fraction 1 (Hexane/DCM)

Naphthalene, 1-methyl-

CAS # = 90-12-0  
1st Dimension R.T. = 837.864  
2nd Dimension R.T. = 0.970  
Quant Mass(es) = 142  
S/N = 1865.5  
Area = 196600  
Height = 35195



Peak True - sample "Lipid BM 3 F1:1", peak 474, at 837.864 , 0.970 sec , sec (Spec # 36187)

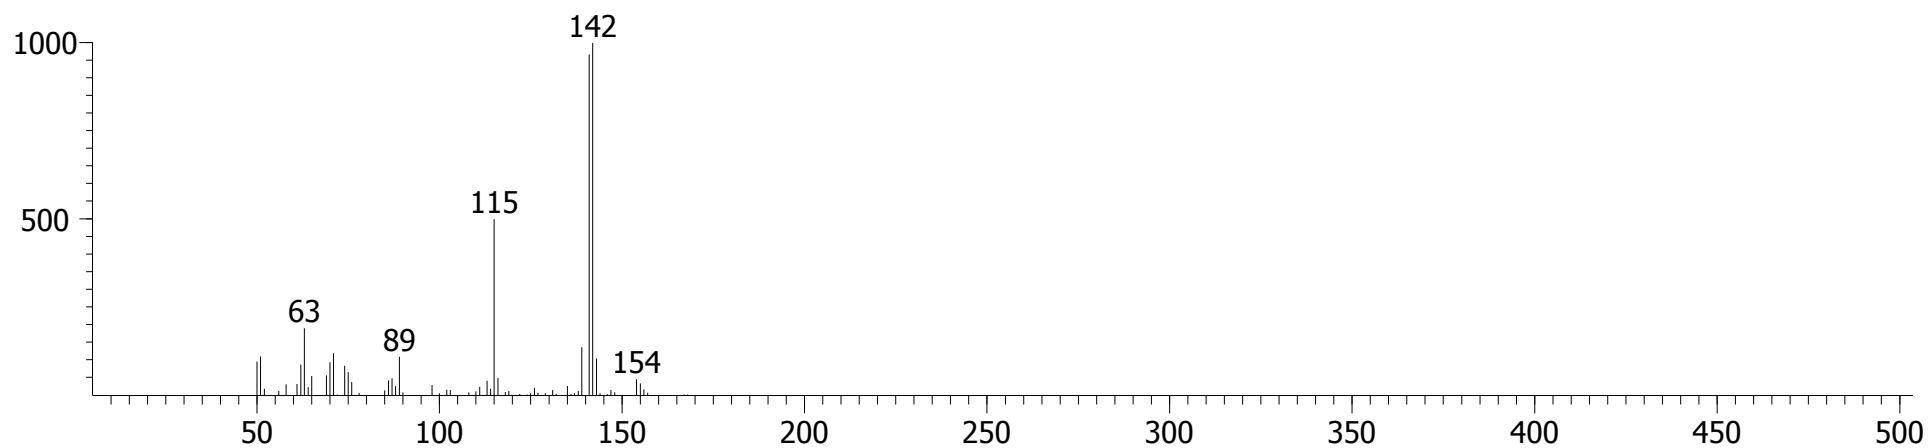

Library Hit - similarity 948, "Naphthalene, 1-methyl-"



Sample 3, Fraction 1 (Hexane/DCM)

Benzenamine, 2-chloro-N,N-dimethyl-

(2-Chloro-N,N-dimethylaniline)

CAS # = 698-01-1  
1st Dimension R.T. = 841.362  
2nd Dimension R.T. = 0.970  
Quant Mass(es) = 154  
S/N = 1147.3  
Area = 65833  
Height = 13296

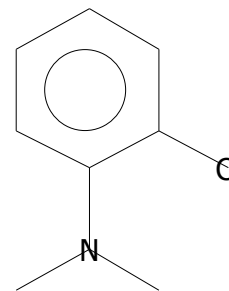

Peak True - sample "Lipid BM 3 F1:1", peak 482, at 841.362 , 0.970 sec , sec (Spec # 36717)

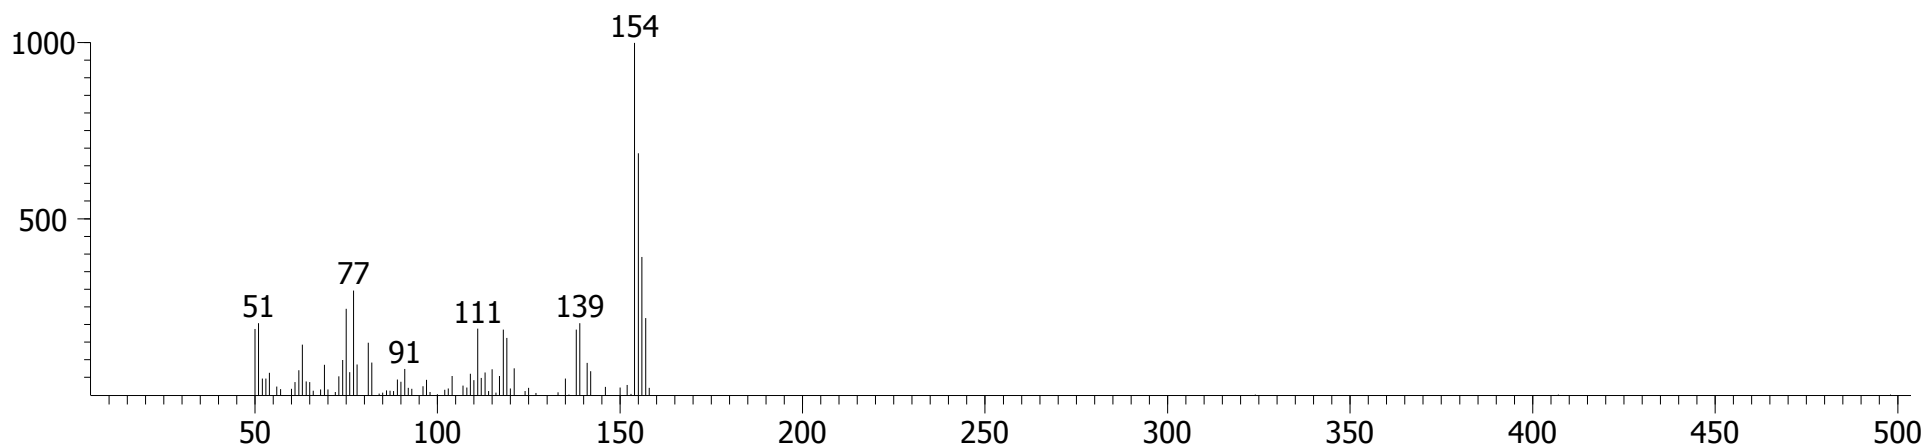

Library Hit - similarity 799, "Benzenamine, 2-chloro-N,N-dimethyl-"

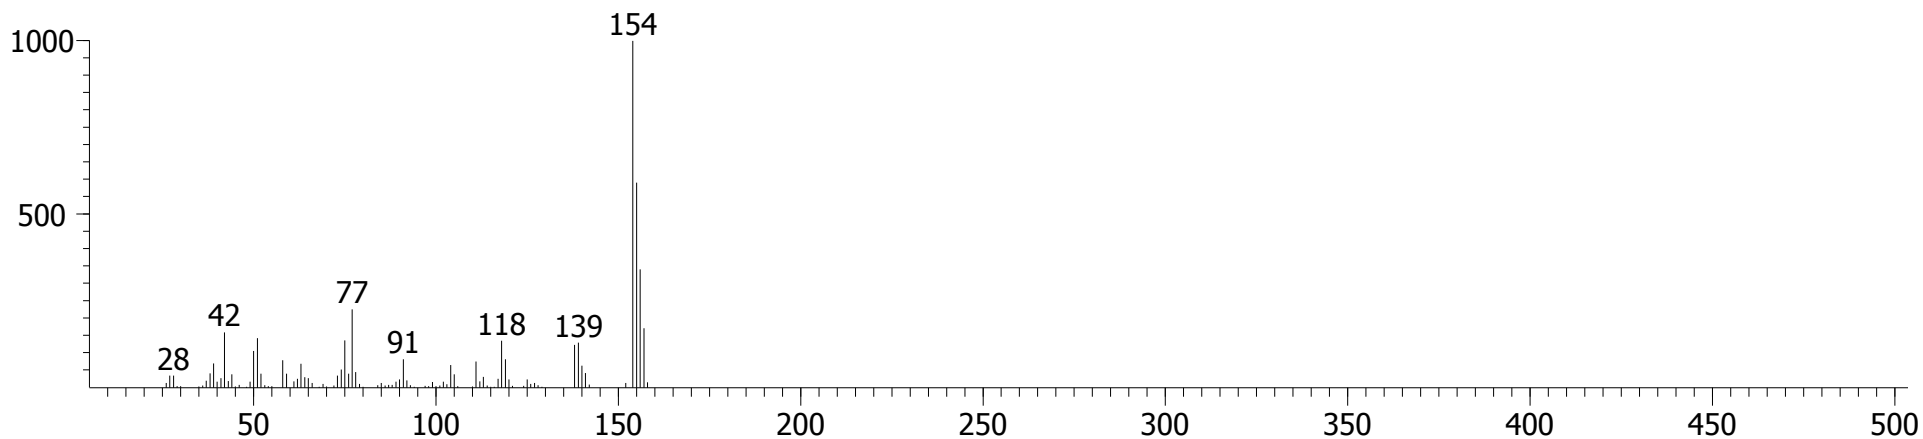

Sample 3, Fraction 1 (Hexane/DCM)

Naphthalene,

1,2,3,4-tetrahydro-2,7-dimethyl-

CAS # = 13065-07-1

1st Dimension R.T. = 848.358

2nd Dimension R.T. = 0.917

Quant Mass(es) = 160

S/N = 627.42

Area = 22427

Height = 3966.9



Peak True - sample "Lipid BM 3 F1:1", peak 494, at 848.358 , 0.917 sec , sec (Spec # 37769)

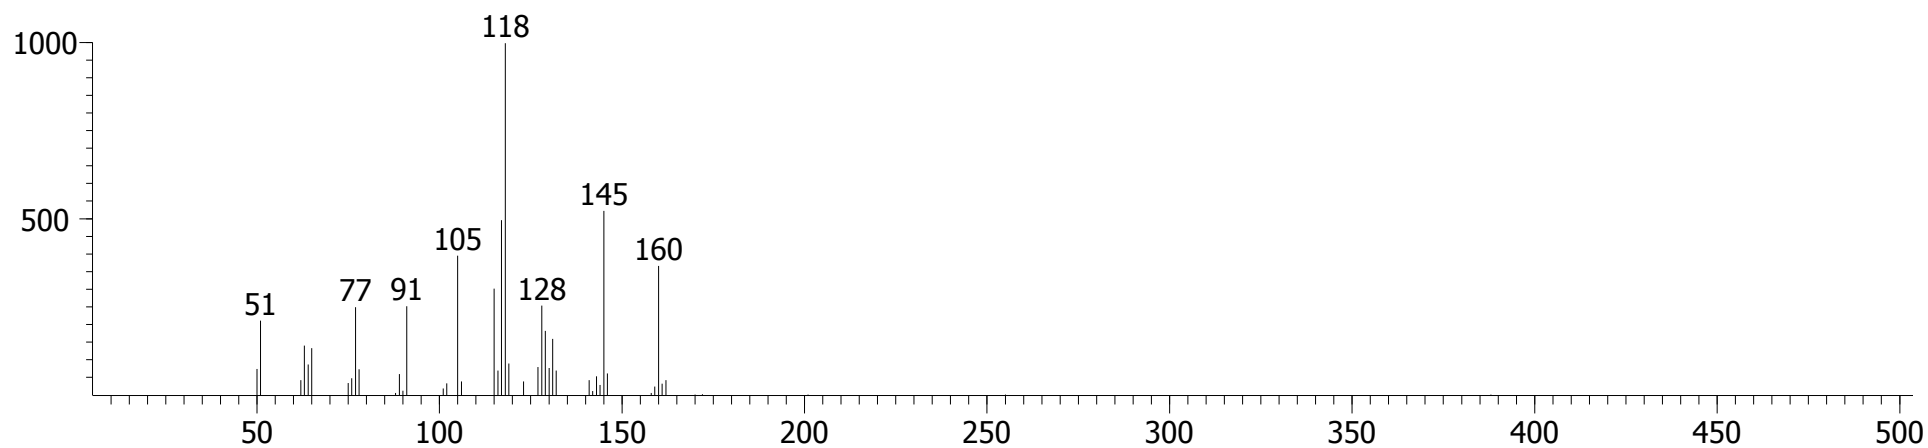

Library Hit - similarity 878, "Naphthalene, 1,2,3,4-tetrahydro-2,7-dimethyl-"

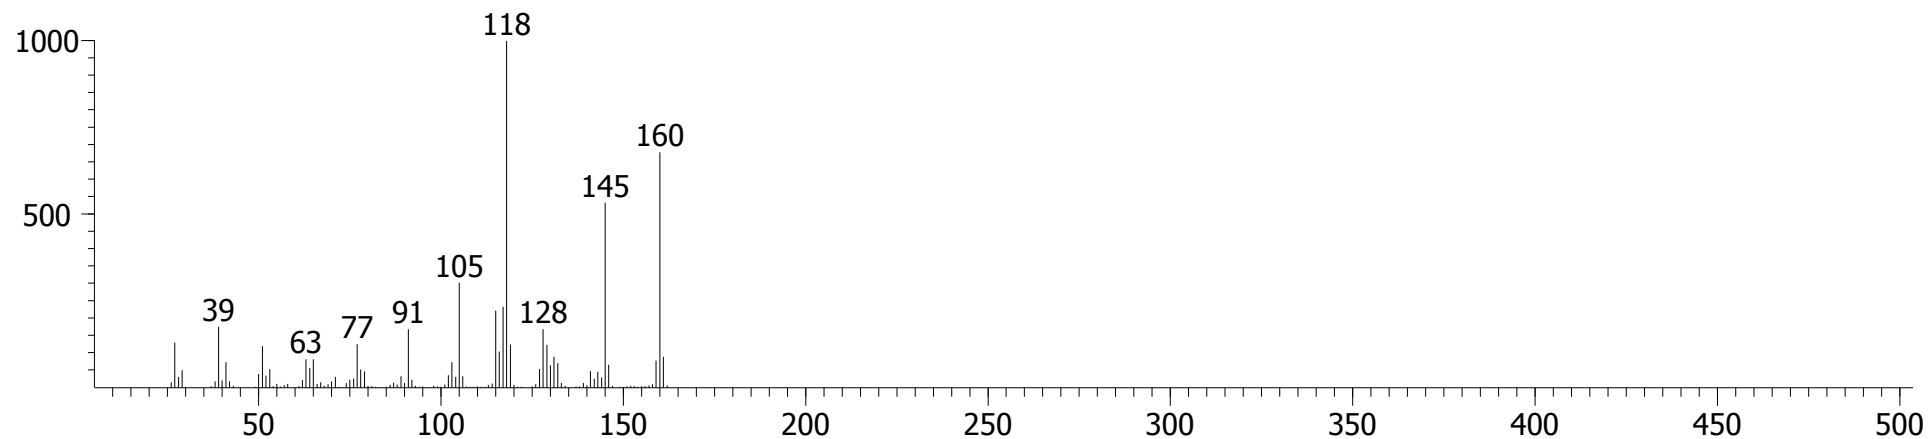

Sample 3, Fraction 1 (Hexane/DCM)

Naphthalene, 1-methyl-

CAS # = 90-12-0  
1st Dimension R.T. = 851.856  
2nd Dimension R.T. = 0.983  
Quant Mass(es) = 142  
S/N = 1850.5  
Area = 101449  
Height = 19864



Peak True - sample "Lipid BM 3 F1:1", peak 502, at 851.856 , 0.983 sec , sec (Spec # 38309)

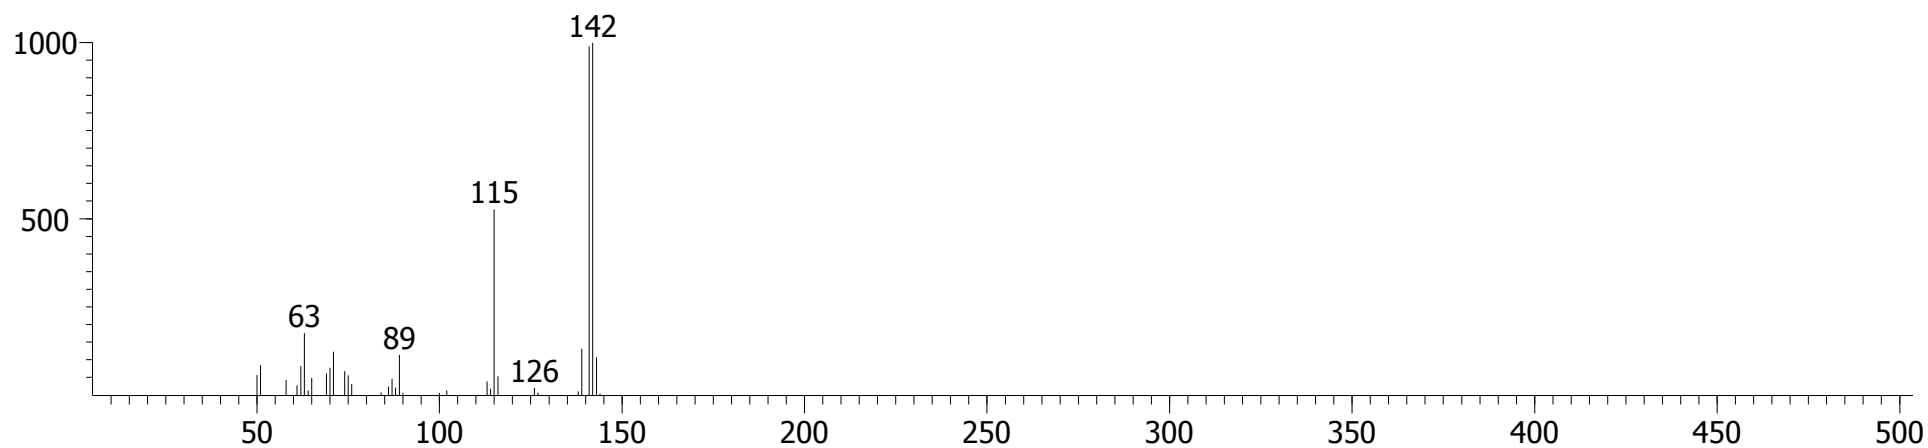

Library Hit - similarity 957, "Naphthalene, 1-methyl-"



Sample 3, Fraction 1 (Hexane/DCM)

Naphthalene,

1,2,3,4-tetrahydro-1,4-dimethyl-

CAS # = 4175-54-6

1st Dimension R.T. = 855.354

2nd Dimension R.T. = 0.931

Quant Mass(es) = 160

S/N = 579.21

Area = 21000

Height = 3549.2



Peak True - sample "Lipid BM 3 F1:1", peak 511, at 855.354 , 0.931 sec , sec (Spec # 38831)

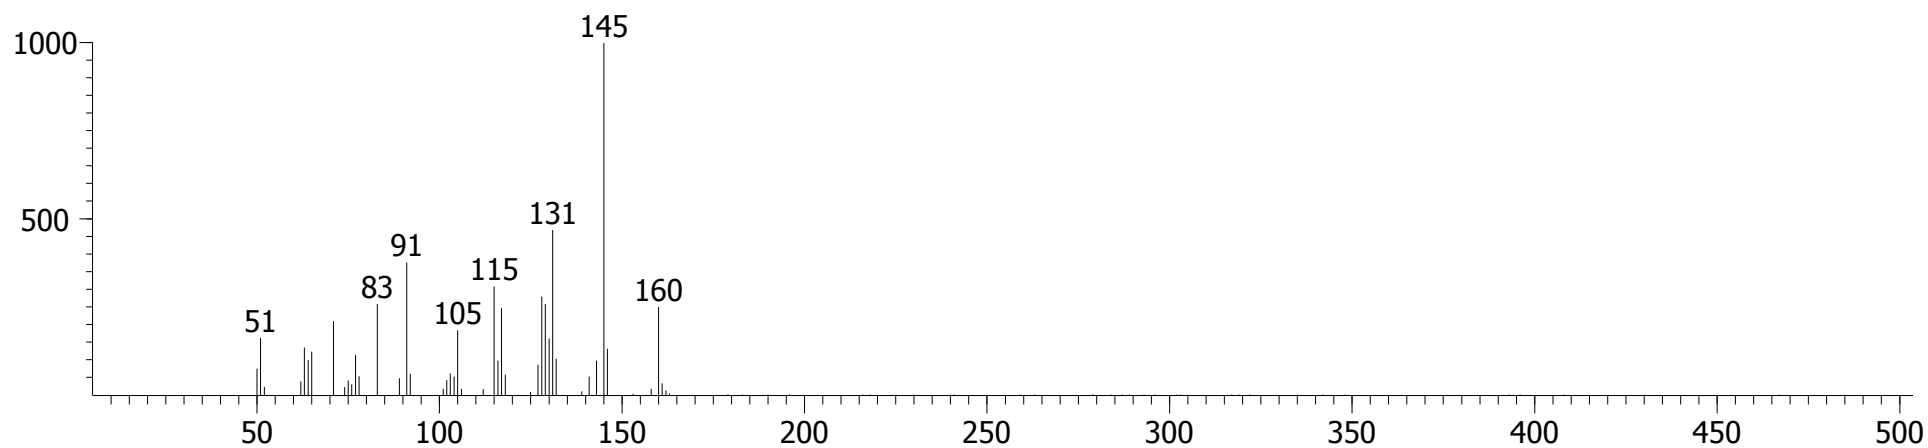

Library Hit - similarity 812, "Naphthalene, 1,2,3,4-tetrahydro-1,4-dimethyl-"



Sample 3, Fraction 1 (Hexane/DCM)

Benzaldehyde, 4-ethoxy-

CAS # = 10031-82-0  
1st Dimension R.T. = 855.354  
2nd Dimension R.T. = 0.990  
Quant Mass(es) = 150  
S/N = 693.84  
Area = 26749  
Height = 4983.9

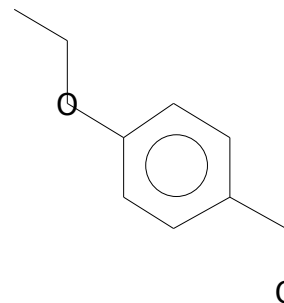

Peak True - sample "Lipid BM 3 F1:1", peak 513, at 855.354 , 0.990 sec , sec (Spec # 38840)

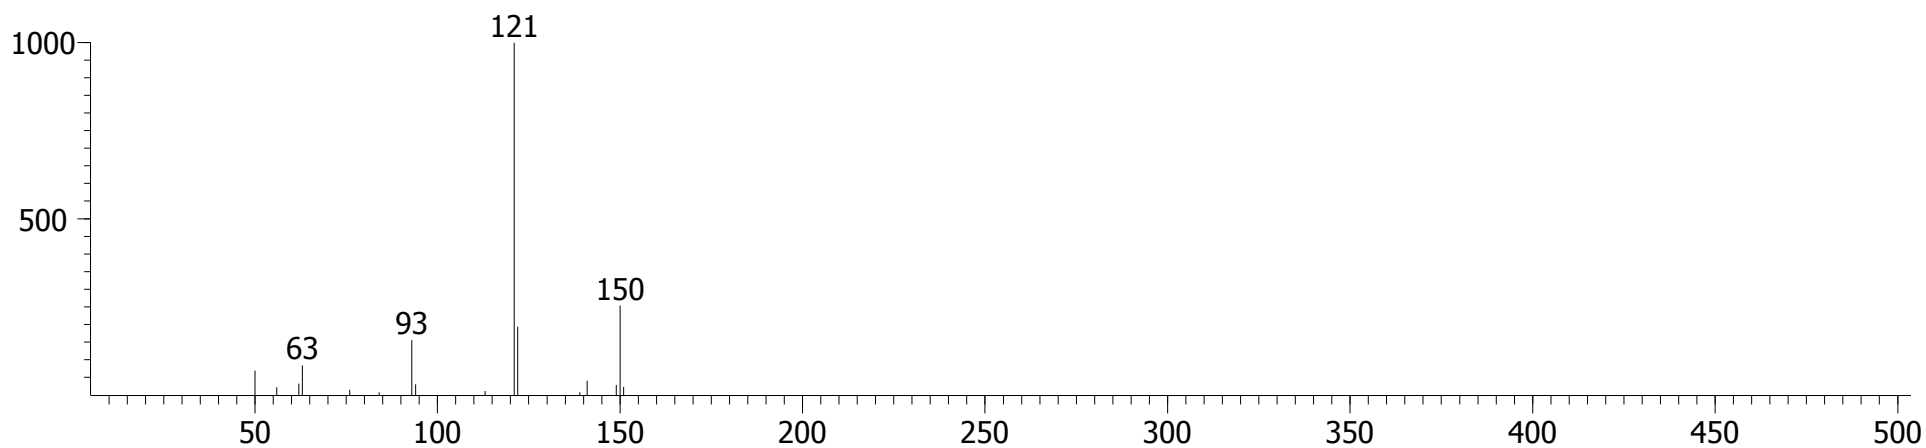

Library Hit - similarity 910, "Benzaldehyde, 4-ethoxy-"



Sample 3, Fraction 1 (Hexane/DCM)

Naphthalene,

1,2,3,4-tetrahydro-1,1,6-trimethyl-

CAS # = 475-03-6

1st Dimension R.T. = 858.852

2nd Dimension R.T. = 0.904

Quant Mass(es) = 174

S/N = 92.312

Area = 1293.5

Height = 230.65

(1,1,6-Trimethyltetralin)



Peak True - sample "Lipid BM 3 F1:1", peak 518, at 858.852 , 0.904 sec , sec (Spec # 39357)

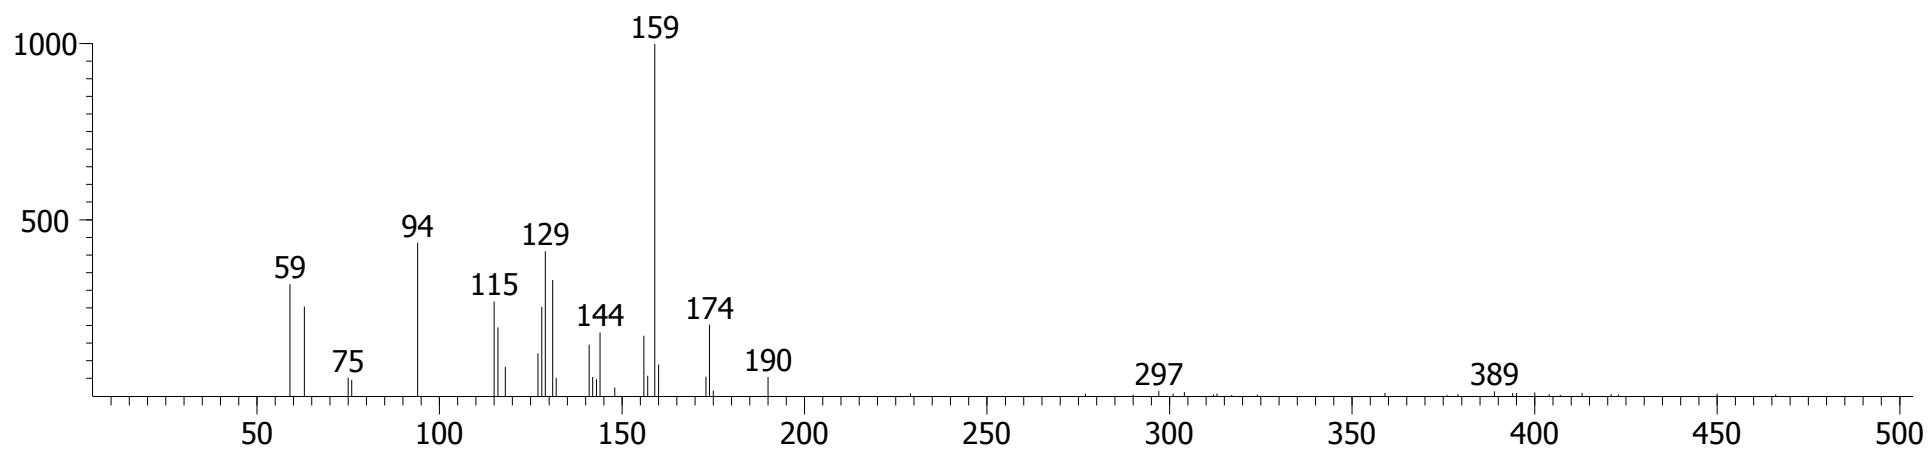

Library Hit - similarity 731, "Naphthalene, 1,2,3,4-tetrahydro-1,1,6-trimethyl-"

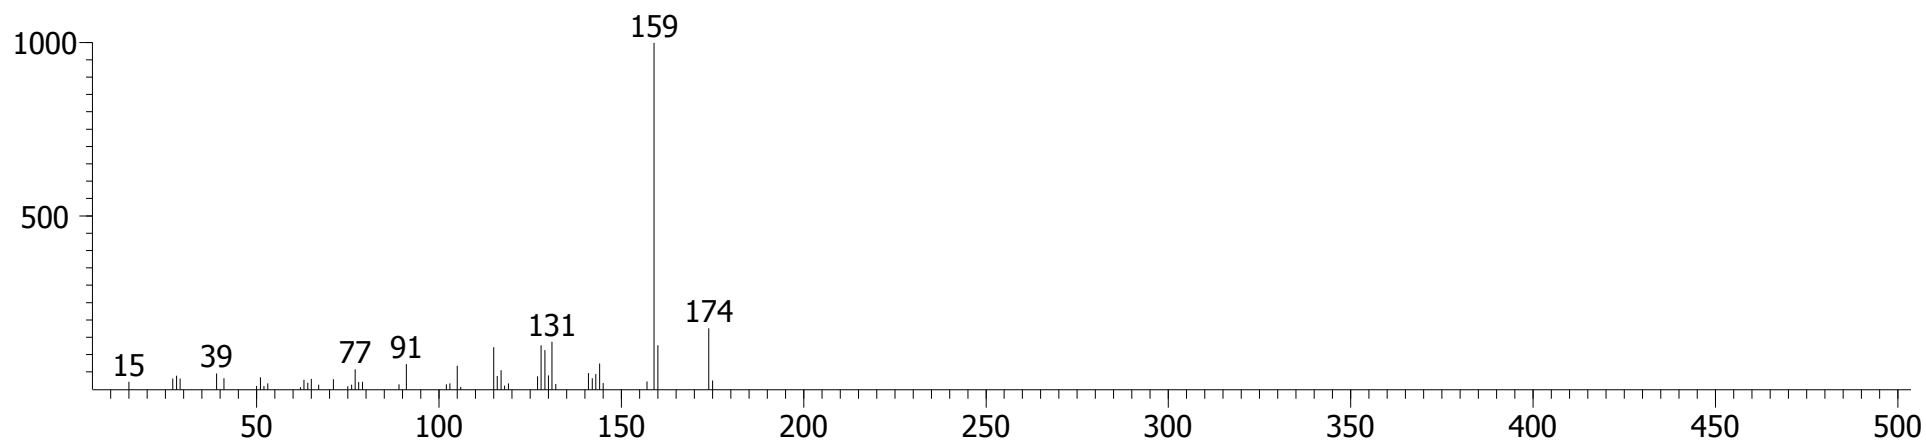



Sample 3, Fraction 1 (Hexane/DCM)

Benzoic acid, 2-(hydroxymethyl)-

CAS # = 612-20-4  
1st Dimension R.T. = 879.84  
2nd Dimension R.T. = 1.096  
Quant Mass(es) = 134  
S/N = 490.42  
Area = 34242  
Height = 6219.6

(2-Hydroxymethylbenzoic acid)

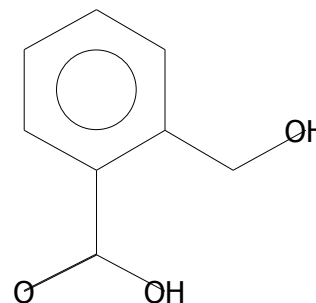

Peak True - sample "Lipid BM 3 F1:1", peak 566, at 879.84 , 1.096 sec , sec (Spec # 42566)

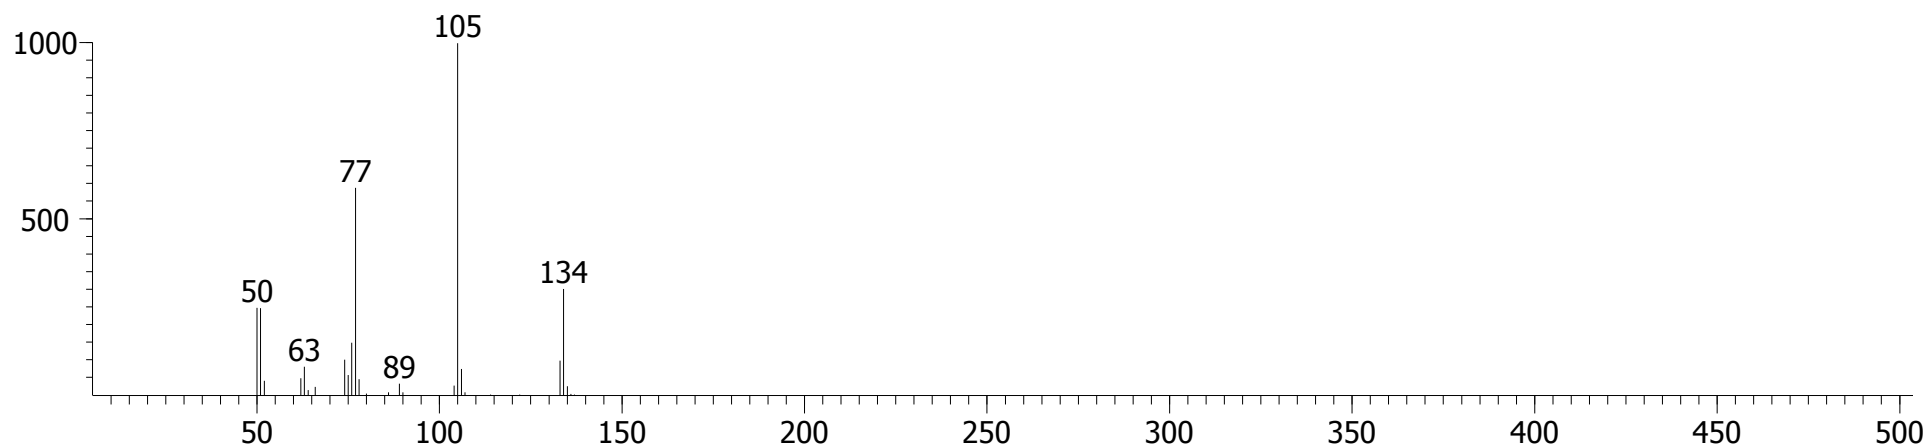

Library Hit - similarity 937, "Benzoic acid, 2-(hydroxymethyl)-"

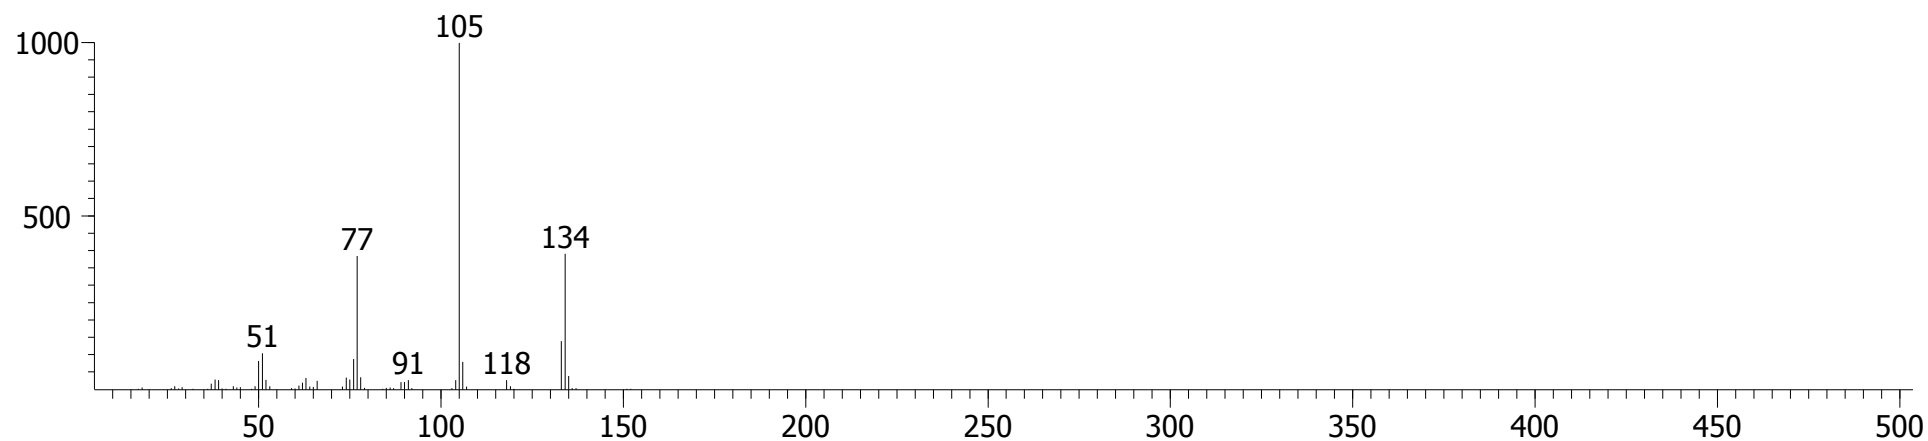

Sample 3, Fraction 1 (Hexane/DCM)

Biphenyl

CAS # = 92-52-4  
1st Dimension R.T. = 900.828  
2nd Dimension R.T. = 0.990  
Quant Mass(es) = 154  
S/N = 662.97  
Area = 56724  
Height = 7209.6



Peak True - sample "Lipid BM 3 F1:1", peak 616, at 900.828 , 0.990 sec , sec (Spec # 45730)

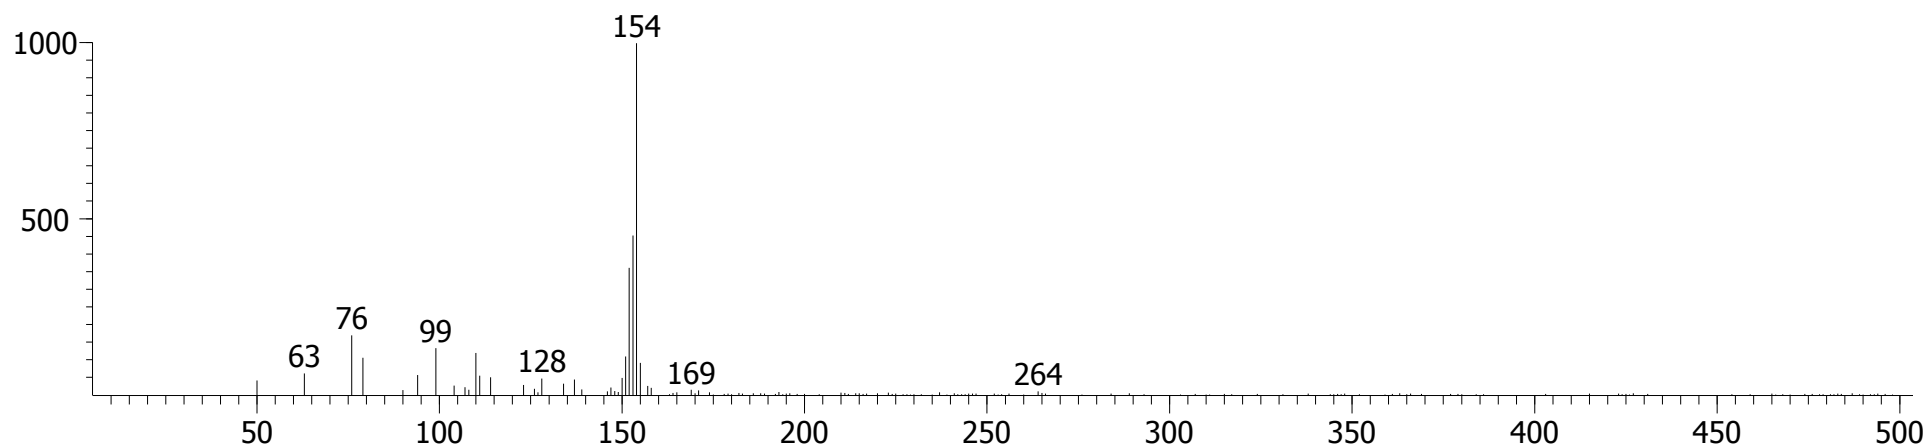

Library Hit - similarity 842, "Biphenyl"

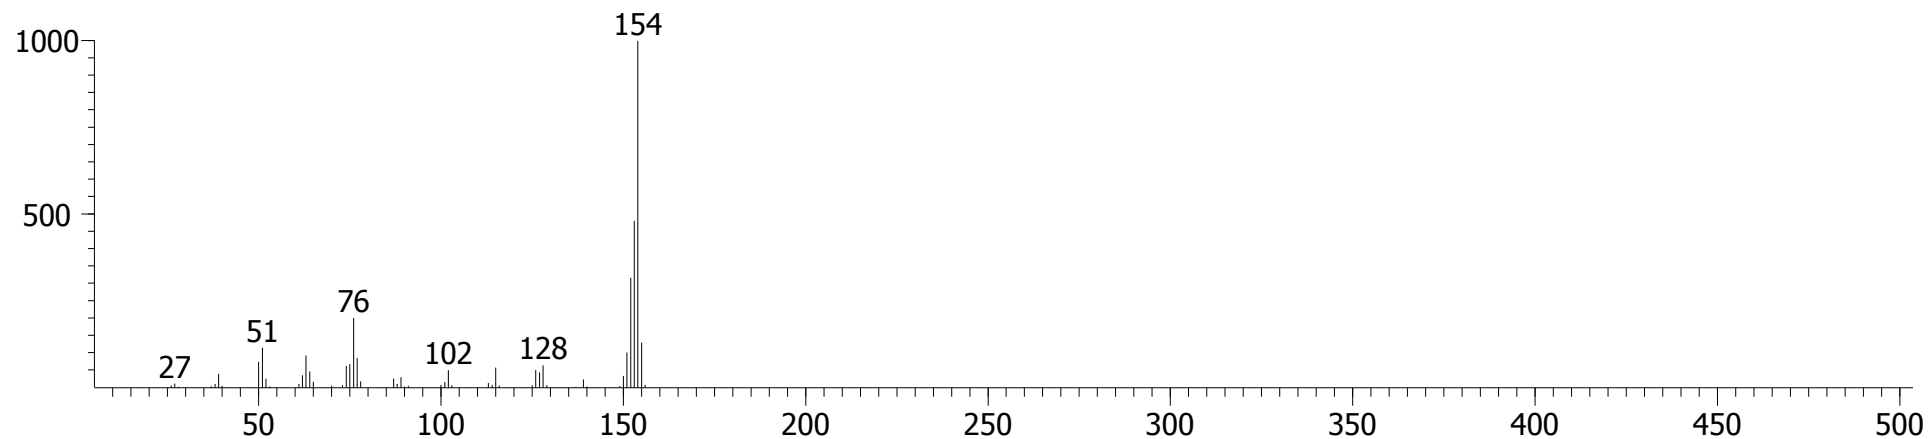

Sample 3, Fraction 1 (Hexane/DCM)

1H-Indole, 2-methyl-

CAS # = 95-20-5  
1st Dimension R.T. = 907.824  
2nd Dimension R.T. = 1.056  
Quant Mass(es) = 130  
S/N = 213.54  
Area = 161116  
Height = 17375

(2-Methylindole)



Peak True - sample "Lipid BM 3 F1:1", peak 631, at 907.824 , 1.056 sec , sec (Spec # 46800)

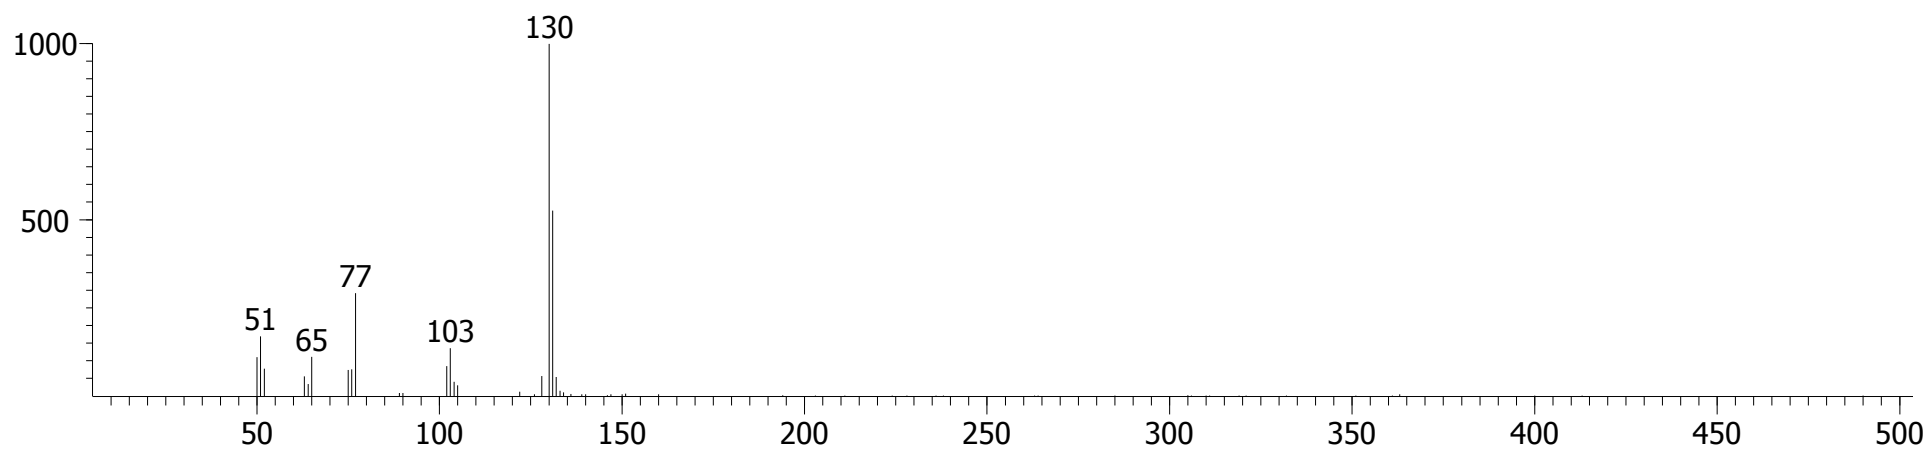

Library Hit - similarity 924, "1H-Indole, 2-methyl-"

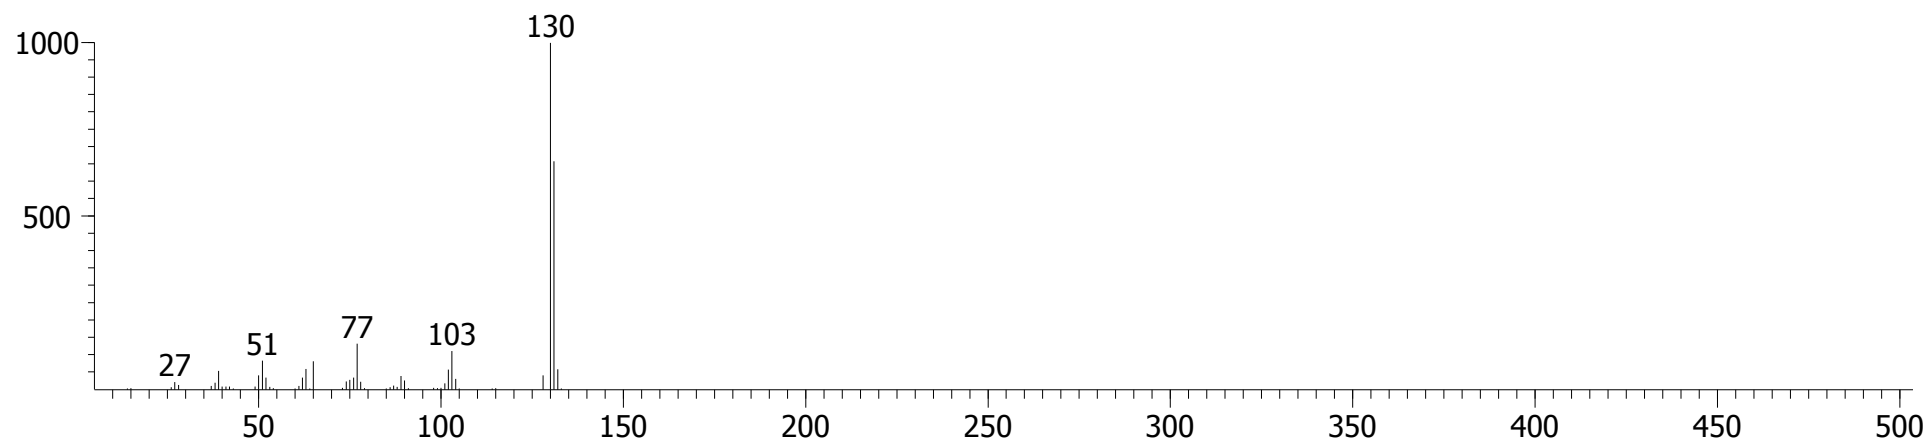

Sample 3, Fraction 1 (Hexane/DCM)

2(3H)-Benzofuranone, 3-methyl-

CAS # = 32267-71-3  
1st Dimension R.T. = 907.824  
2nd Dimension R.T. = 1.069  
Quant Mass(es) = 148  
S/N = 63.462  
Area = 7103.8  
Height = 1191.4

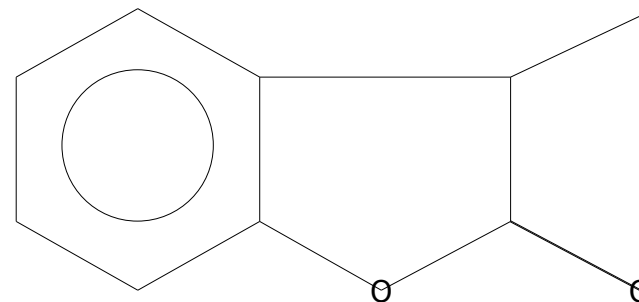

Peak True - sample "Lipid BM 3 F1:1", peak 632, at 907.824 , 1.069 sec , sec (Spec # 46802)

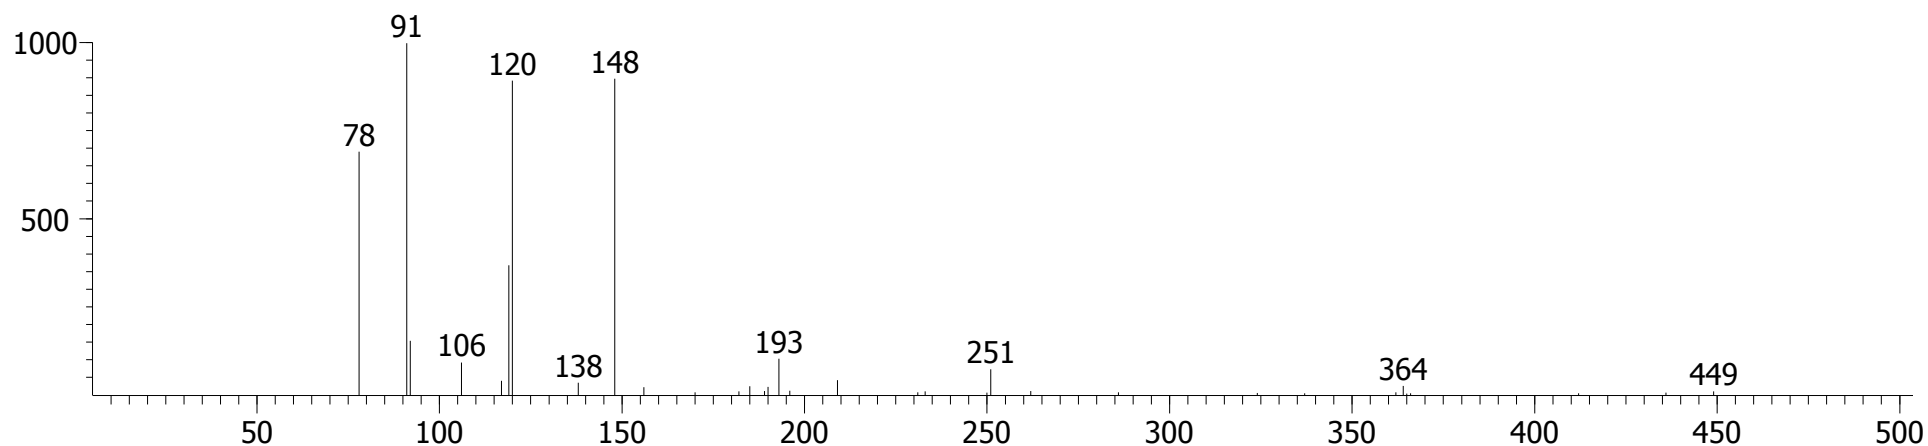

Library Hit - similarity 707, "2(3H)-Benzofuranone, 3-methyl-"

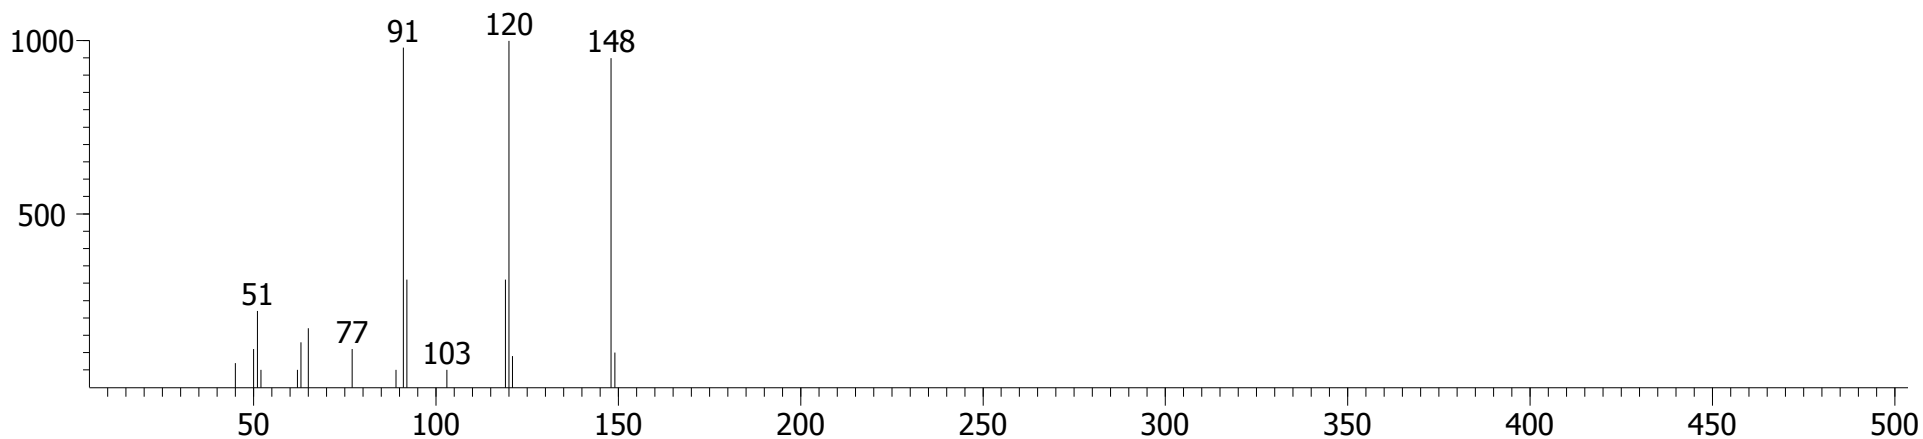

Sample 3, Fraction 1 (Hexane/DCM)

Diphenyl ether

CAS # = 101-84-8  
1st Dimension R.T. = 914.82  
2nd Dimension R.T. = 0.990  
Quant Mass(es) = 170  
S/N = 1875.3  
Area = 79404  
Height = 15585

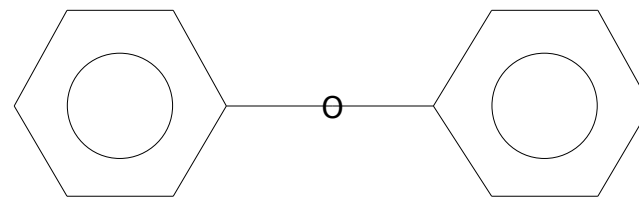

Peak True - sample "Lipid BM 3 F1:1", peak 652, at 914.82 , 0.990 sec , sec (Spec # 47850)

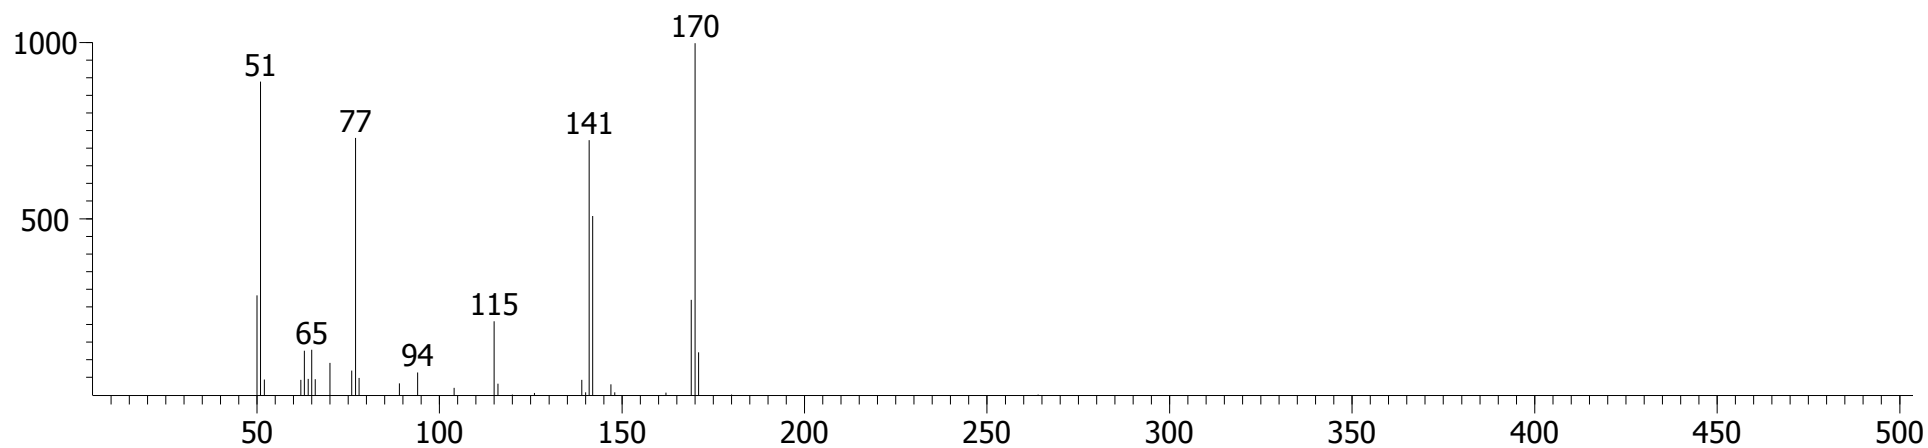

Library Hit - similarity 915, "Diphenyl ether"

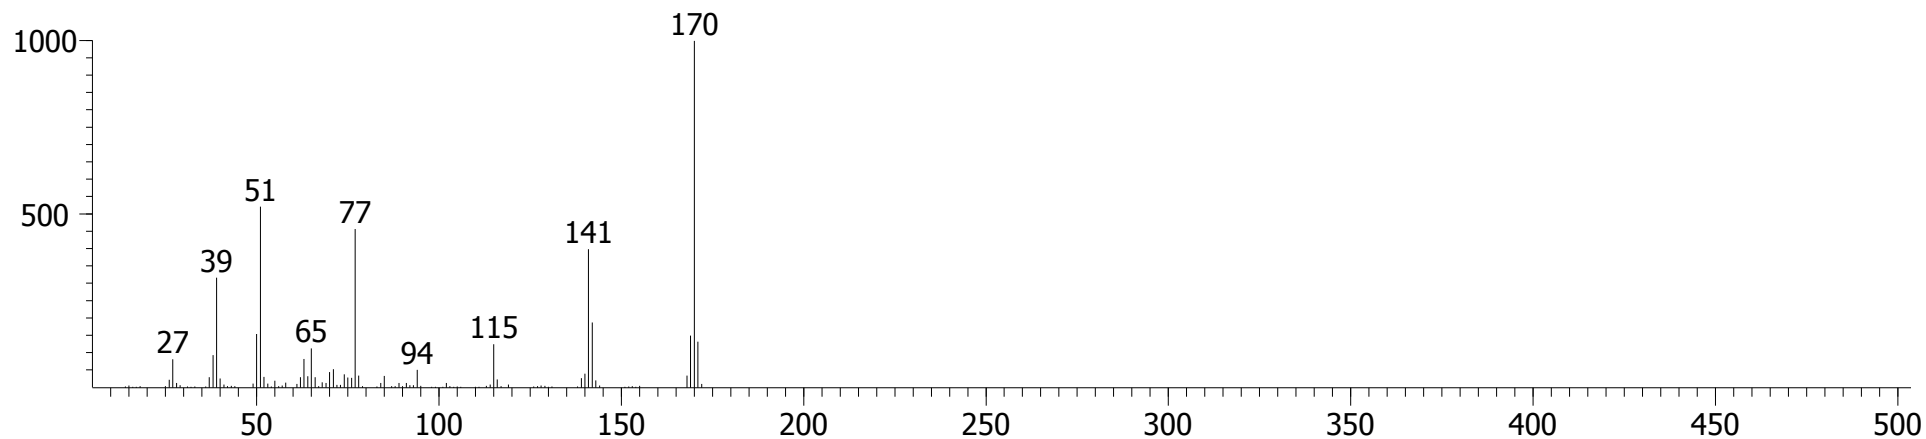

Sample 3, Fraction 1 (Hexane/DCM)

Benzoic acid, 2-(methylamino)-, methyl ester

CAS # = 85-91-6  
1st Dimension R.T. = 918.318  
2nd Dimension R.T. = 1.003  
Quant Mass(es) = 165  
S/N = 95.436  
Area = 13836  
Height = 2352.7

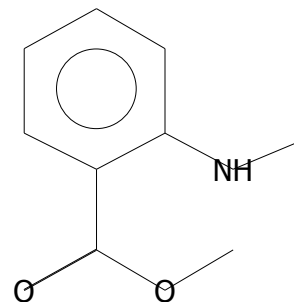

Peak True - sample "Lipid BM 3 F1:1", peak 658, at 918.318 , 1.003 sec , sec (Spec # 48382)

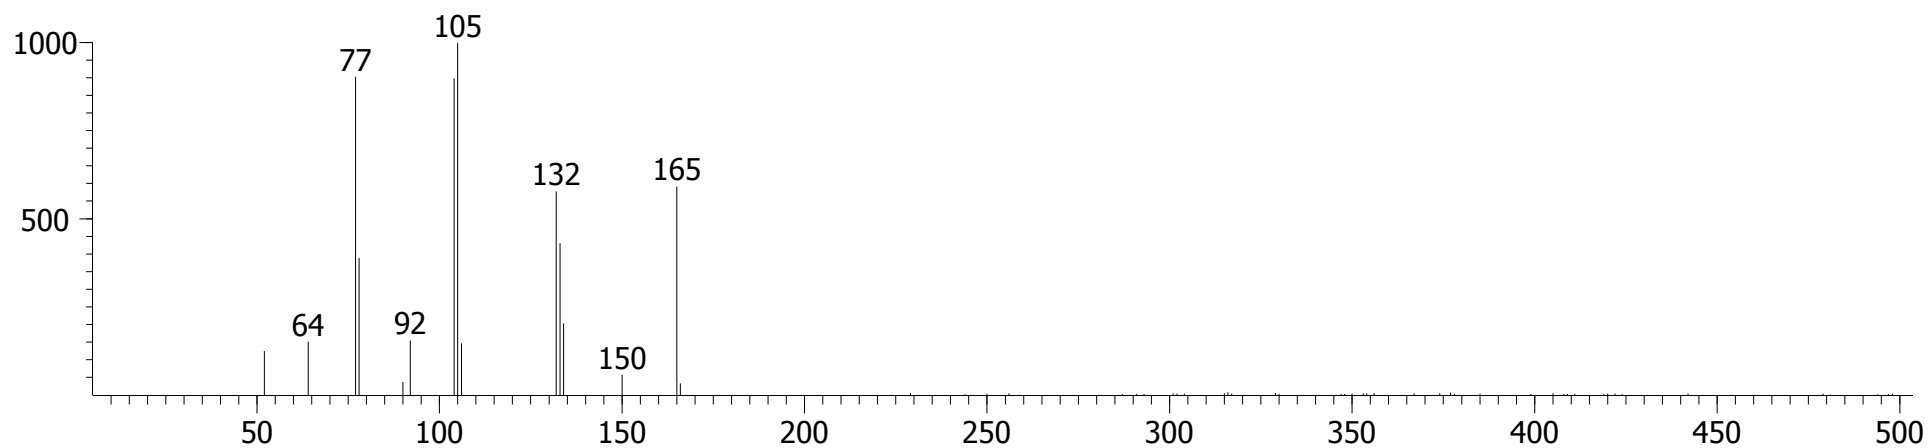

Library Hit - similarity 843, "Benzoic acid, 2-(methylamino)-, methyl ester"

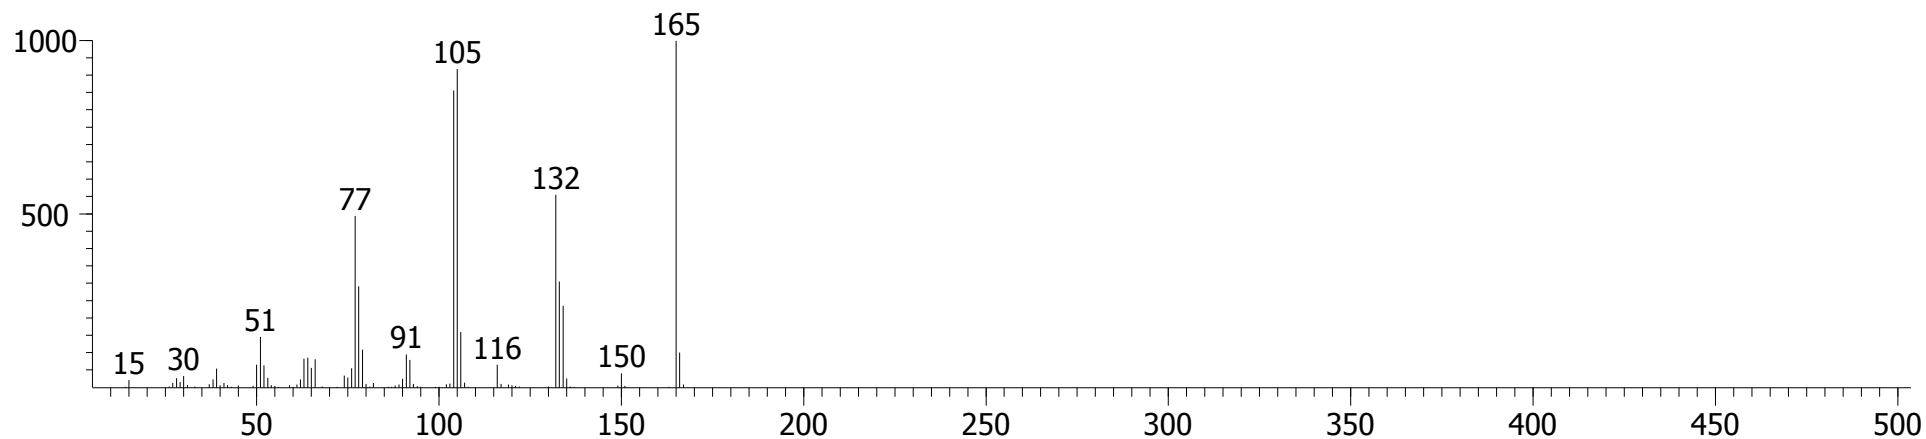

Sample 3, Fraction 1 (Hexane/DCM)

Naphthalene, 1,7-dimethyl-

CAS # = 575-37-1  
1st Dimension R.T. = 921.816  
2nd Dimension R.T. = 0.970  
Quant Mass(es) = 156  
S/N = 1946.3  
Area = 124698  
Height = 24184

1,7-Dimethylnaphthalene

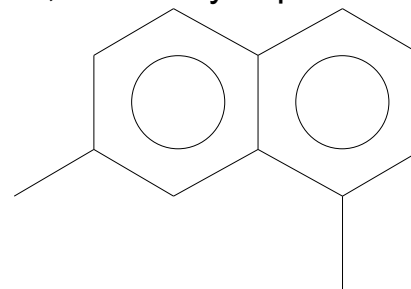

Peak True - sample "Lipid BM 3 F1:1", peak 665, at 921.816 , 0.970 sec , sec (Spec # 48907)

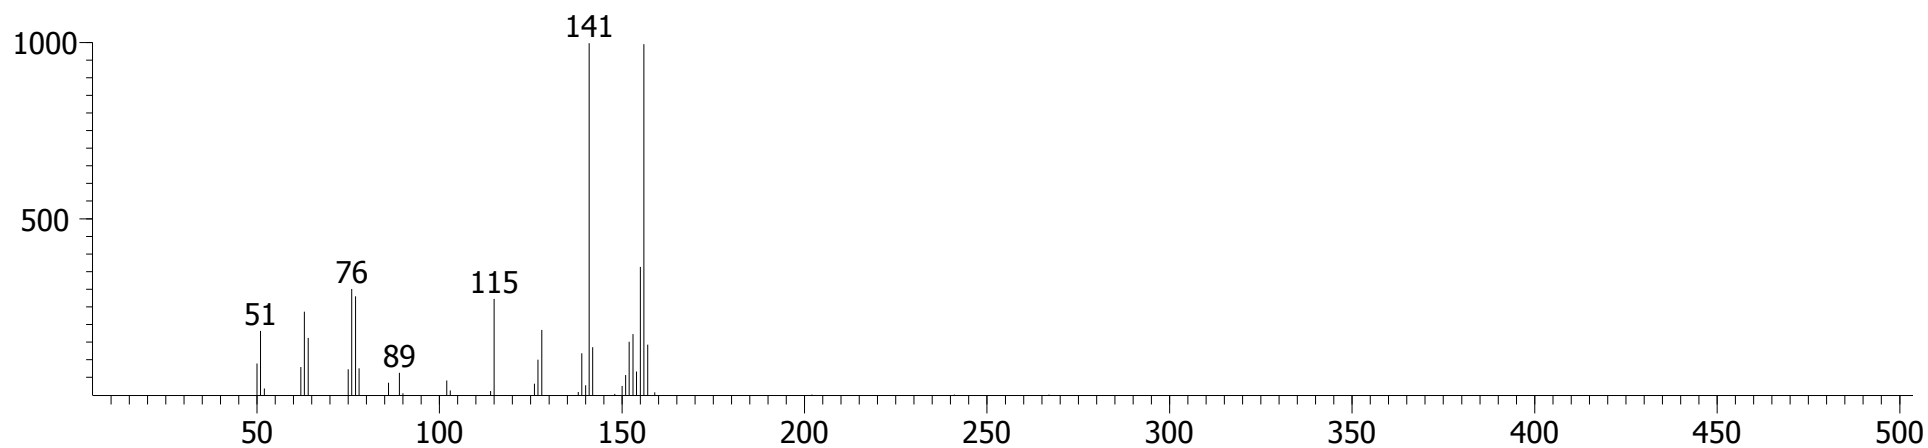

Library Hit - similarity 951, "Naphthalene, 1,7-dimethyl-"



Sample 3, Fraction 1 (Hexane/DCM)

Naphthalene, 1,7-dimethyl-

CAS # = 575-37-1  
1st Dimension R.T. = 935.808  
2nd Dimension R.T. = 0.983  
Quant Mass(es) = 156  
S/N = 1701.9  
Area = 149250  
Height = 27921

1,7-Dimethylnaphthalene

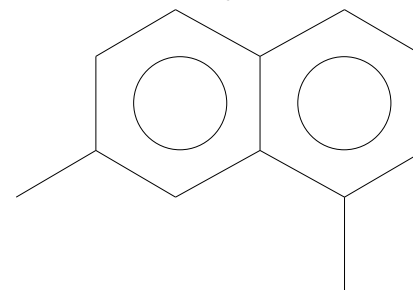

Peak True - sample "Lipid BM 3 F1:1", peak 697, at 935.808 , 0.983 sec , sec (Spec # 51029)

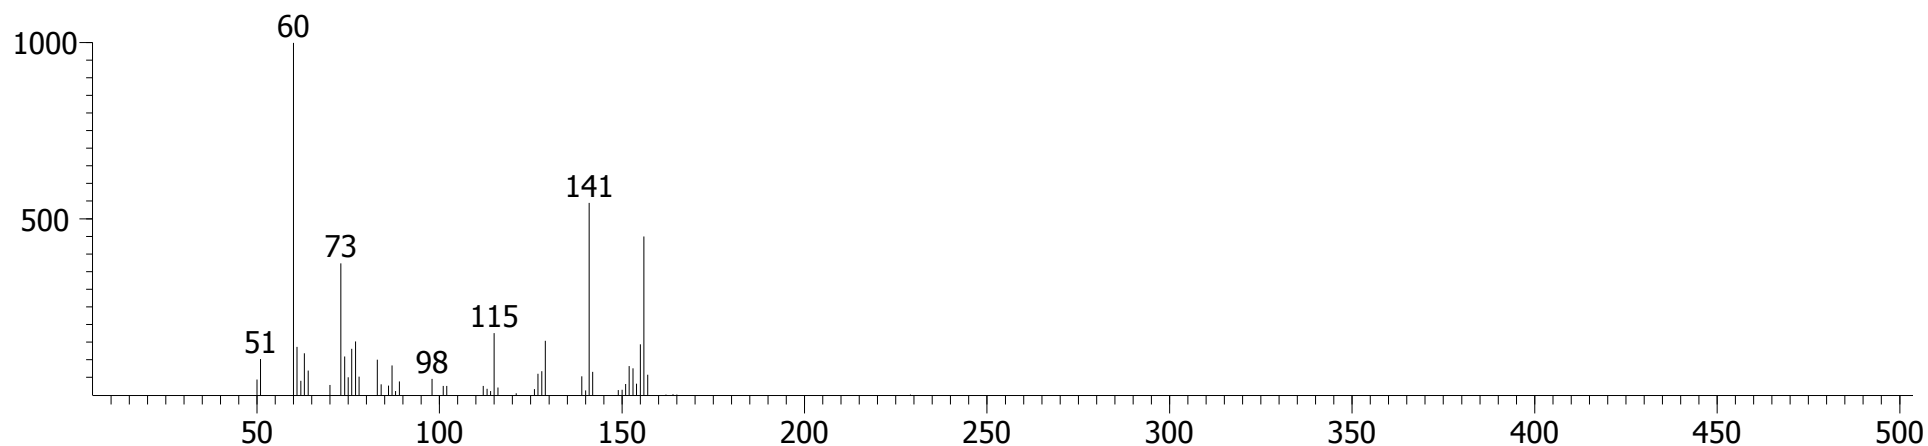

Library Hit - similarity 753, "Naphthalene, 1,7-dimethyl-"





Sample 3, Fraction 1 (Hexane/DCM)

Naphthalene, 1,7-dimethyl-

CAS # = 575-37-1  
1st Dimension R.T. = 949.8  
2nd Dimension R.T. = 0.990  
Quant Mass(es) = 156  
S/N = 371.99  
Area = 20842  
Height = 3631.7

1,7-Dimethylnaphthalene



Peak True - sample "Lipid BM 3 F1:1", peak 738, at 949.8 , 0.990 sec , sec (Spec # 53150)

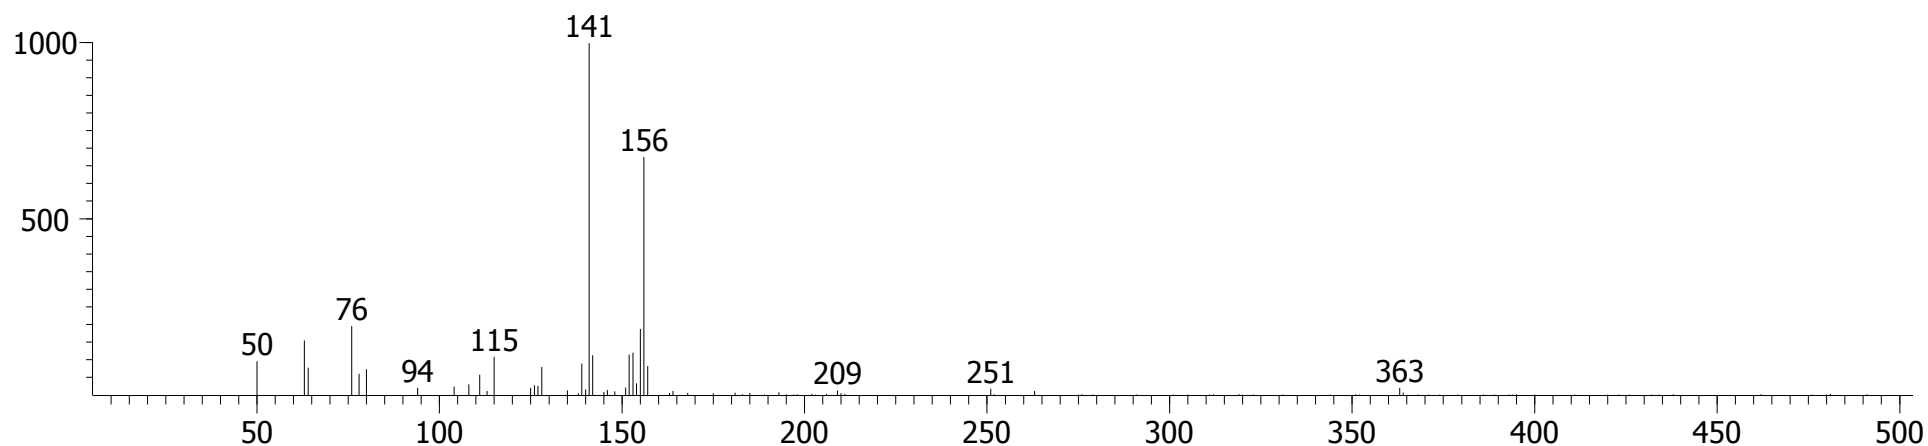

Library Hit - similarity 885, "Naphthalene, 1,7-dimethyl-"



Sample 3, Fraction 1 (Hexane/DCM)

2-Propenoic acid, 3-(2-hydroxyphenyl)-,  
(E)-

CAS # = 614-60-8  
1st Dimension R.T. = 953.298  
2nd Dimension R.T. = 1.109  
Quant Mass(es) = 146  
S/N = 100.12  
Area = 6060.5  
Height = 1107.7

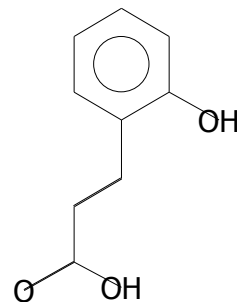

Peak True - sample "Lipid BM 3 F1:1", peak 748, at 953.298 , 1.109 sec , sec (Spec # 53698)

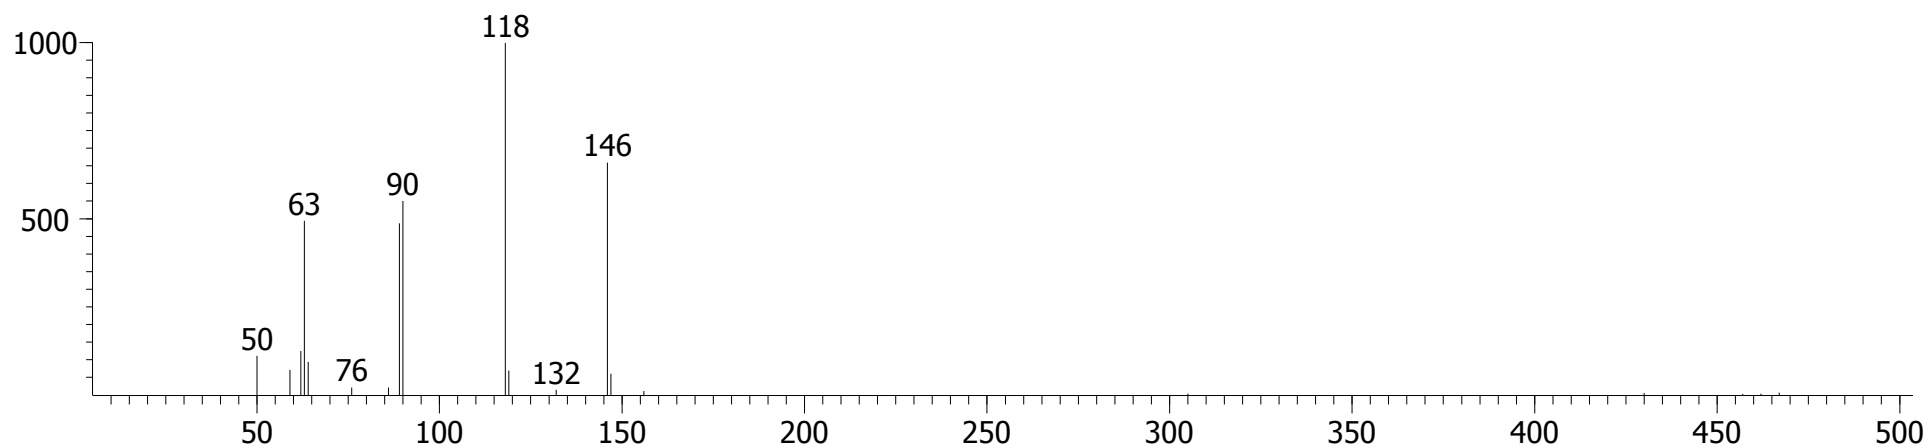

Library Hit - similarity 938, "2-Propenoic acid, 3-(2-hydroxyphenyl)-, (E)-"

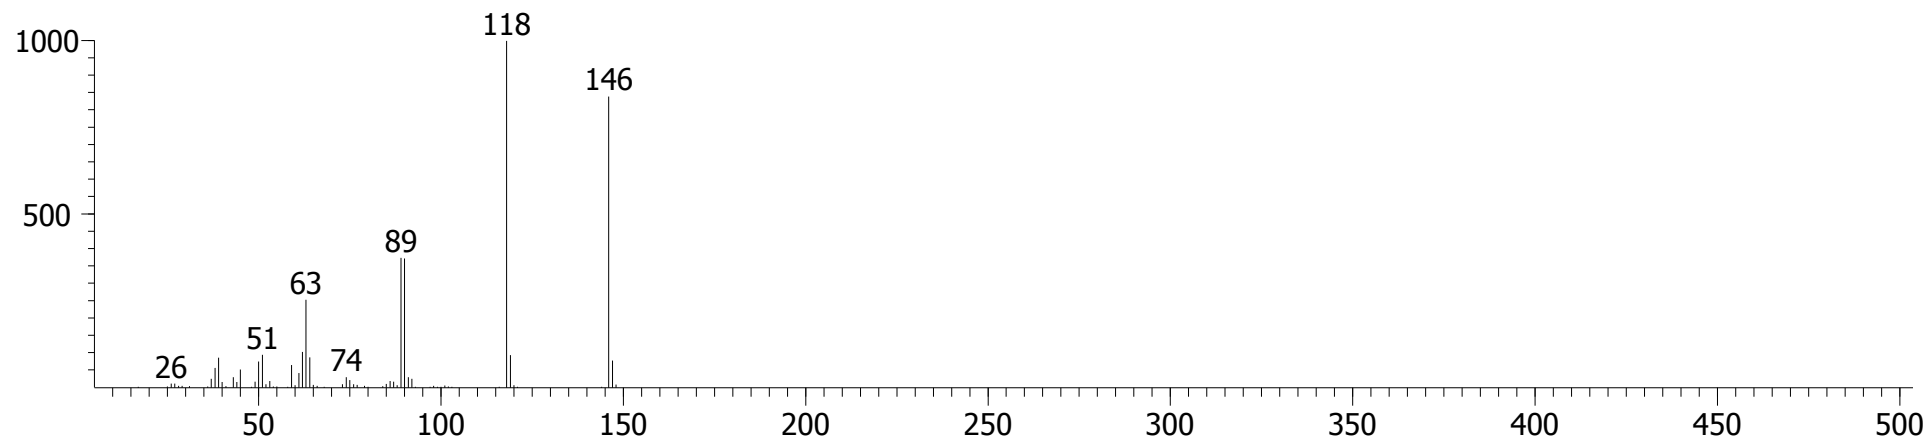

Sample 3, Fraction 1 (Hexane/DCM)

Naphthalene, 1-ethyl-

CAS # = 1127-76-0  
1st Dimension R.T. = 963.792  
2nd Dimension R.T. = 1.010  
Quant Mass(es) = 156  
S/N = 290.85  
Area = 15379  
Height = 2839.7



Peak True - sample "Lipid BM 3 F1:1", peak 780, at 963.792 , 1.010 sec , sec (Spec # 55273)

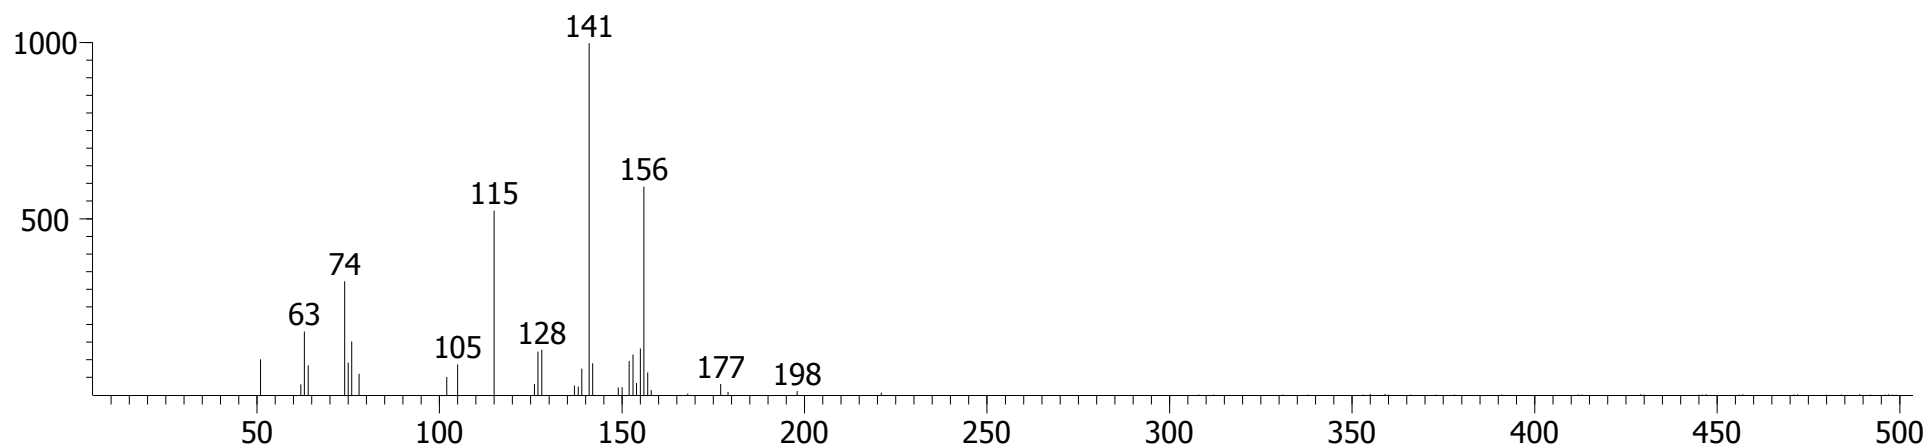

Library Hit - similarity 866, "Naphthalene, 1-ethyl-"

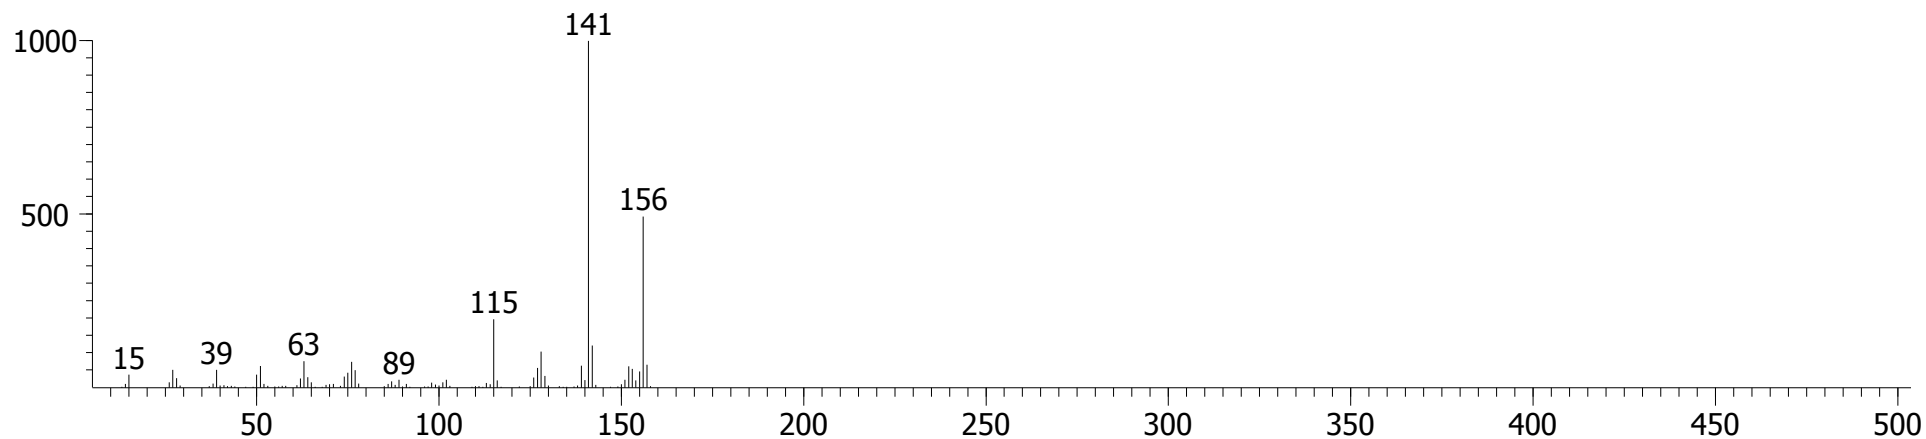

Sample 3, Fraction 1 (Hexane/DCM)

o-Cyanobenzoic acid

CAS # = 3839-22-3  
1st Dimension R.T. = 963.792  
2nd Dimension R.T. = 1.115  
Quant Mass(es) = 147  
S/N = 482.90  
Area = 101957  
Height = 18229



(2-Cyanobenzoic acid)

Peak True - sample "Lipid BM 3 F1:1", peak 782, at 963.792 , 1.115 sec , sec (Spec # 55289)

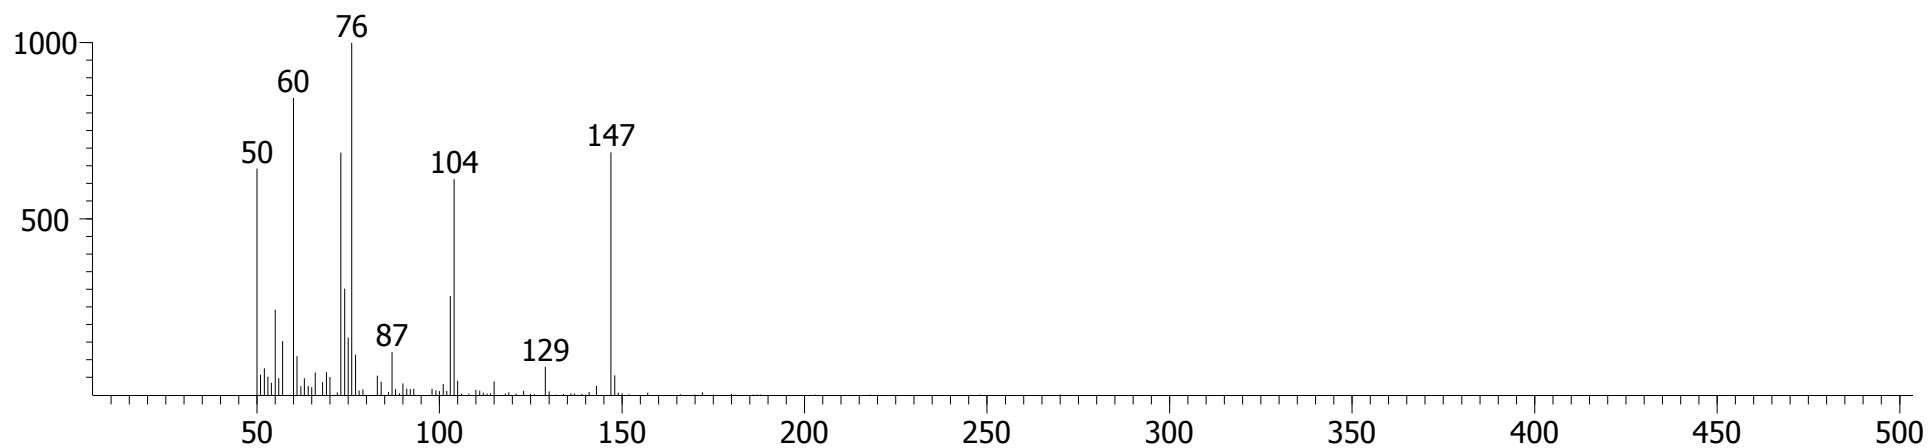

Library Hit - similarity 770, "o-Cyanobenzoic acid"



Sample 3, Fraction 1 (Hexane/DCM)

1H-Pyrrole, 1-(4-chlorophenyl)-

CAS # = 5044-38-2  
1st Dimension R.T. = 967.29  
2nd Dimension R.T. = 1.003  
Quant Mass(es) = 177  
S/N = 93.446  
Area = 12887  
Height = 2403.1



(1-(4-Chlorophenyl)pyrrole)

Peak True - sample "Lipid BM 3 F1:1", peak 791, at 967.29 , 1.003 sec , sec (Spec # 55802)

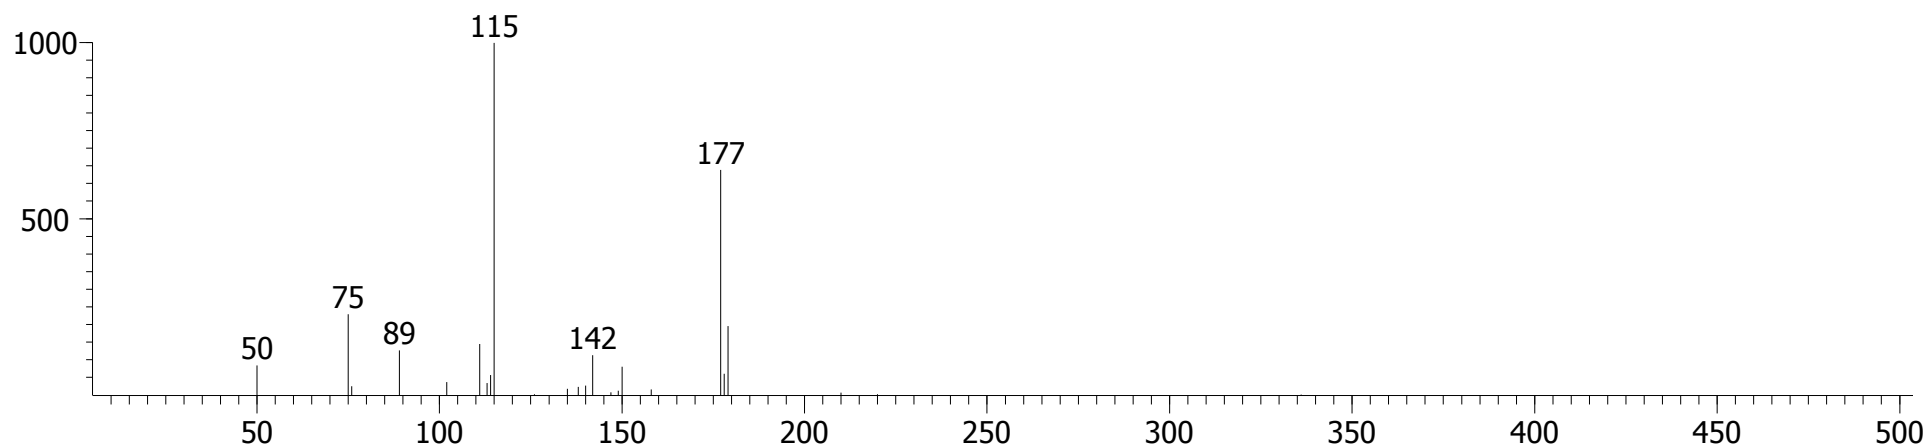

Library Hit - similarity 864, "1H-Pyrrole, 1-(4-chlorophenyl)-"



Sample 3, Fraction 1 (Hexane/DCM)

1,1'-Biphenyl, 4-methyl-

(4-Methylbiphenyl)

CAS # = 644-08-6  
1st Dimension R.T. = 977.784  
2nd Dimension R.T. = 0.990  
Quant Mass(es) = 168  
S/N = 1033.1  
Area = 46301  
Height = 9105.4



Peak True - sample "Lipid BM 3 F1:1", peak 821, at 977.784 , 0.990 sec , sec (Spec # 57390)

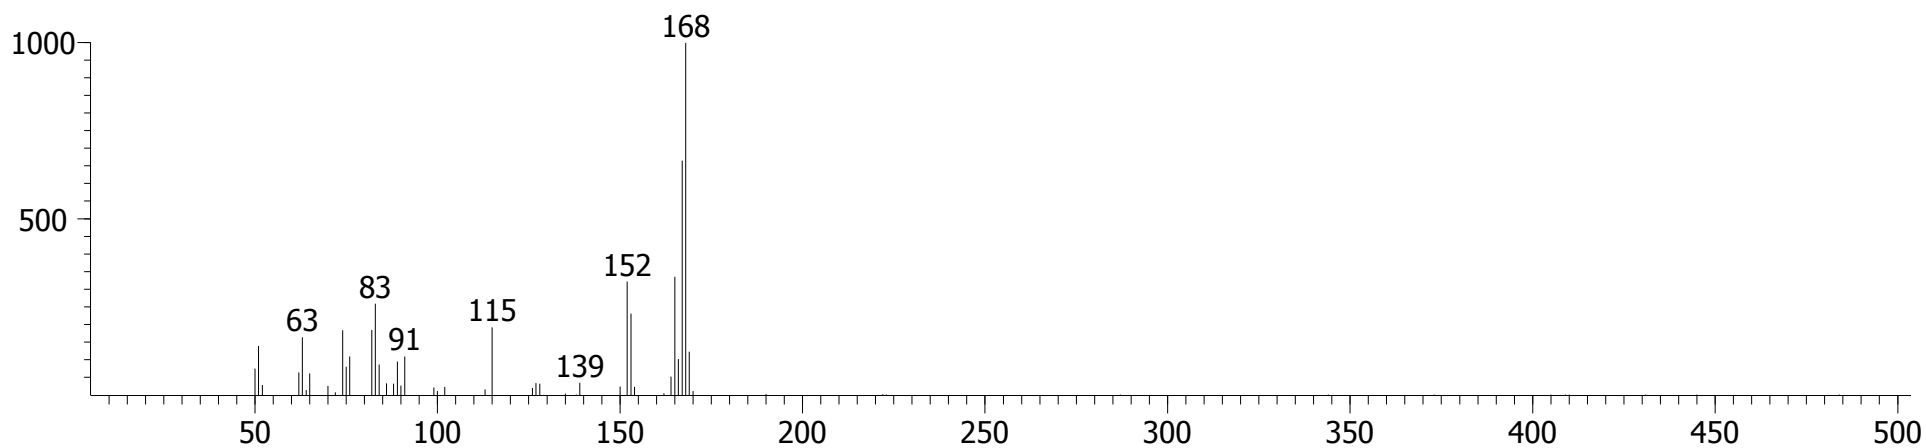

Library Hit - similarity 934, "1,1'-Biphenyl, 4-methyl-"

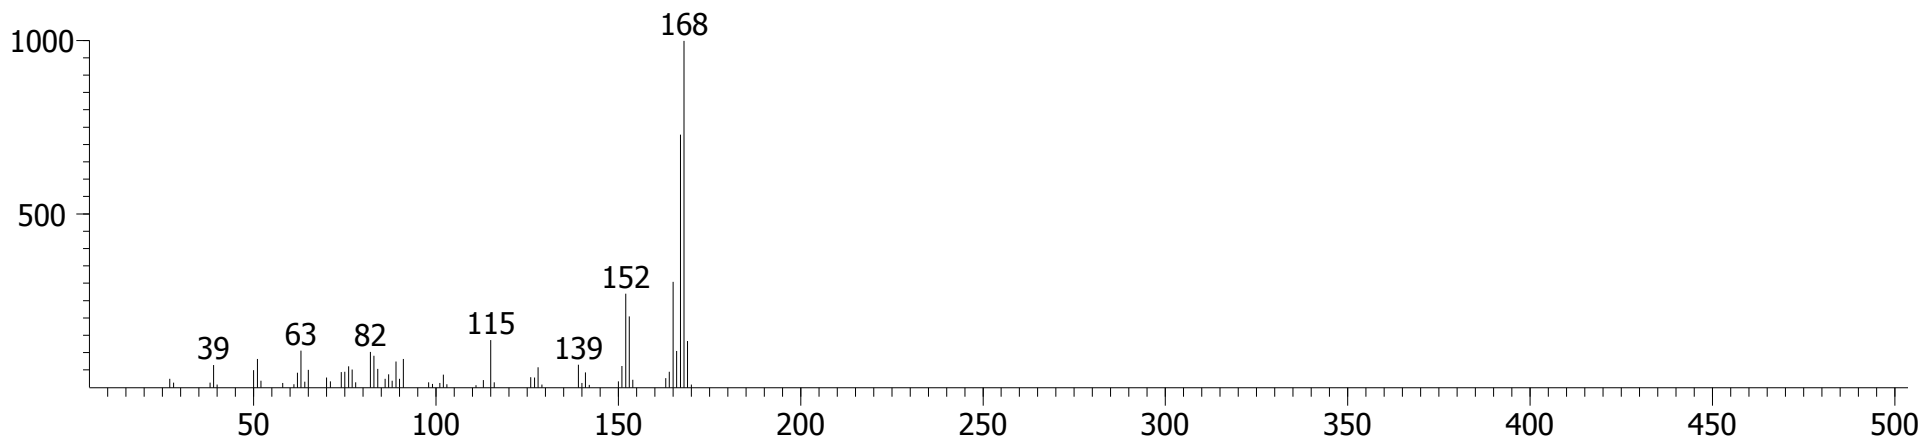

Sample 3, Fraction 1 (Hexane/DCM)

Phenol, 2,4-bis(1,1-dimethylethyl)-

CAS # = 96-76-4  
1st Dimension R.T. = 981.282  
2nd Dimension R.T. = 0.944  
Quant Mass(es) = 206  
S/N = 8067.6  
Area = 859038  
Height = 141455



(2,4-Di-tert-butylphenol)

Peak True - sample "Lipid BM 3 F1:1", peak 831, at 981.282 , 0.944 sec , sec (Spec # 57913)

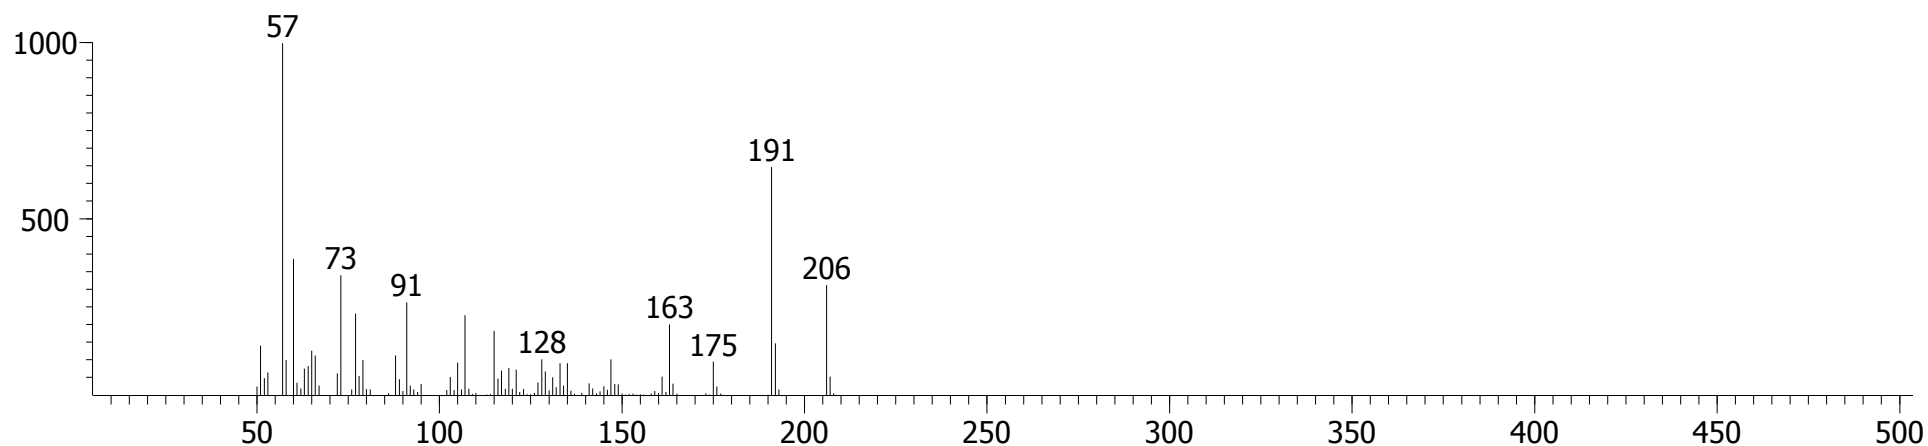

Library Hit - similarity 807, "Phenol, 2,4-bis(1,1-dimethylethyl)-"



Sample 3, Fraction 1 (Hexane/DCM)

UNKNOWN # 3

CAS # = 932-96-7  
1st Dimension R.T. = 981.282  
2nd Dimension R.T. = 1.049  
Quant Mass(es) = 140  
S/N = 8970.2  
Area = 1846931  
Height = 381929



(4-Chloro-N-methylaniline)

Peak True - sample "Lipid BM 3 F1:1", peak 835, at 981.282 , 1.049 sec , sec (Spec # 57929)

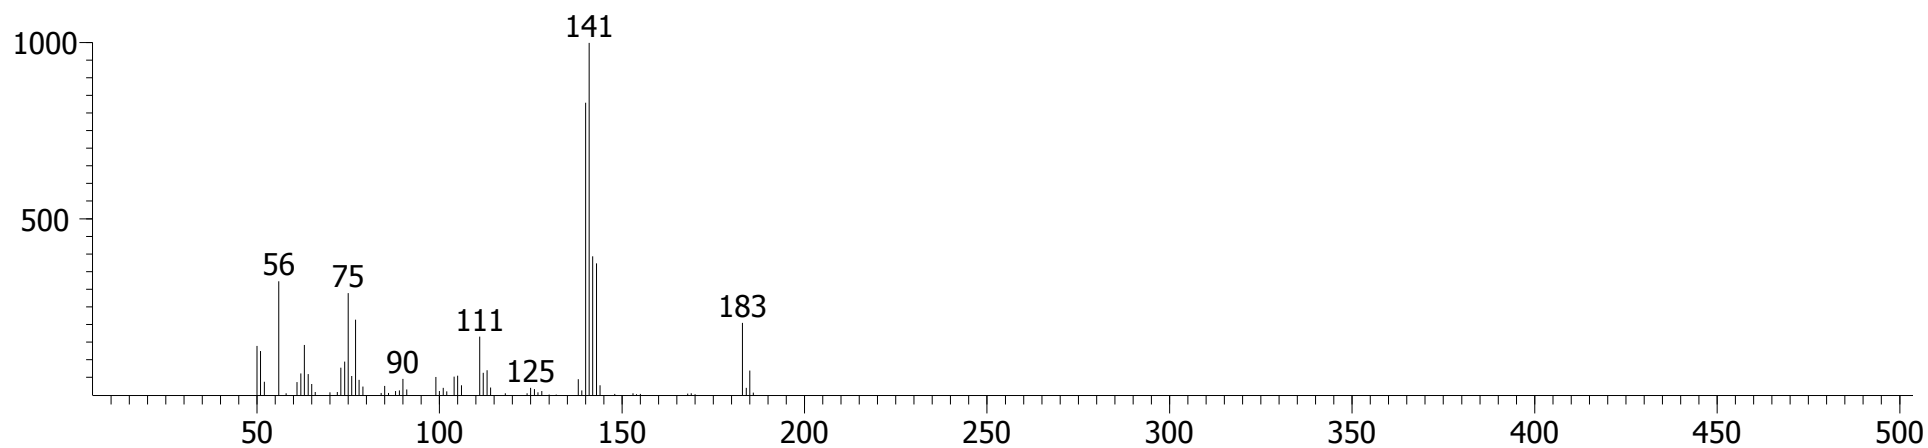

Library Hit - similarity 829, "Benzenamine, 4-chloro-N-methyl-"





Sample 3, Fraction 1 (Hexane/DCM)

1,1'-Biphenyl, 4-methyl-

(4-Methylbiphenyl)

CAS # = 644-08-6  
1st Dimension R.T. = 984.78  
2nd Dimension R.T. = 0.997  
Quant Mass(es) = 168  
S/N = 443.65  
Area = 19950  
Height = 3910.2



Peak True - sample "Lipid BM 3 F1:1", peak 844, at 984.78 , 0.997 sec , sec (Spec # 58451)

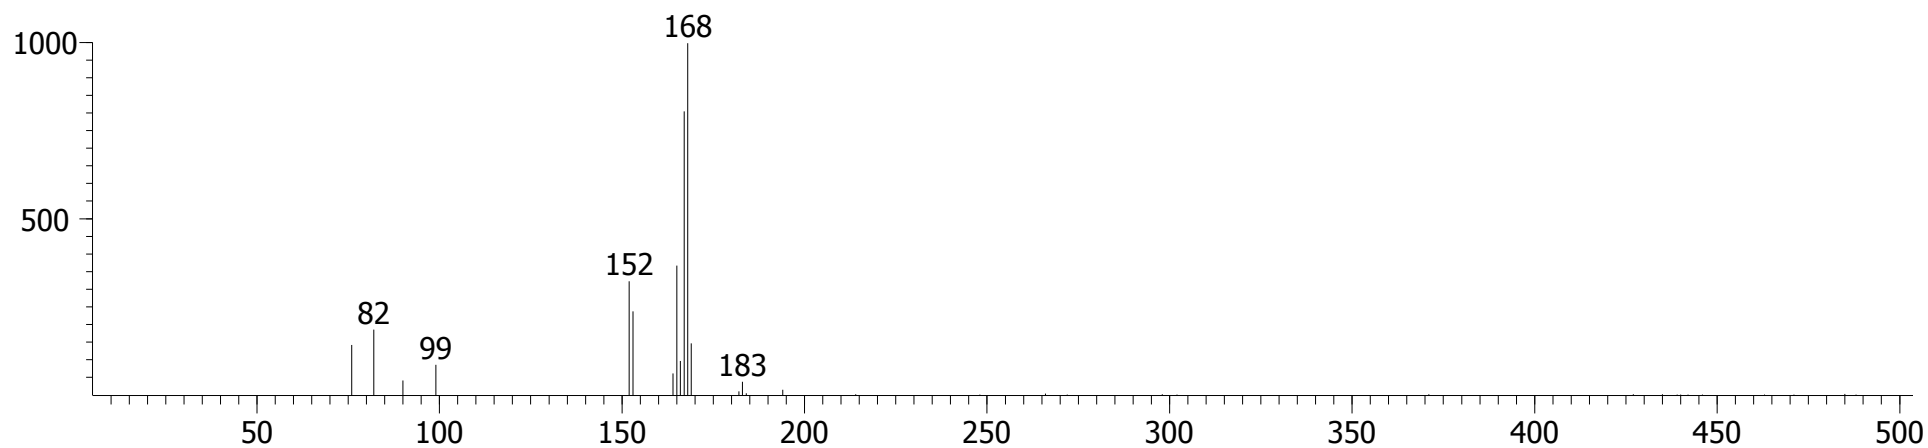

Library Hit - similarity 878, "1,1'-Biphenyl, 4-methyl-"



Sample 3, Fraction 1 (Hexane/DCM)

Benzoic acid, 4-ethoxy-, ethyl ester

CAS # = 23676-09-7  
1st Dimension R.T. = 995.274  
2nd Dimension R.T. = 0.983  
Quant Mass(es) = 194  
S/N = 8259.4  
Area = 820311  
Height = 126185

(Ethyl 4-ethoxybenzoate)

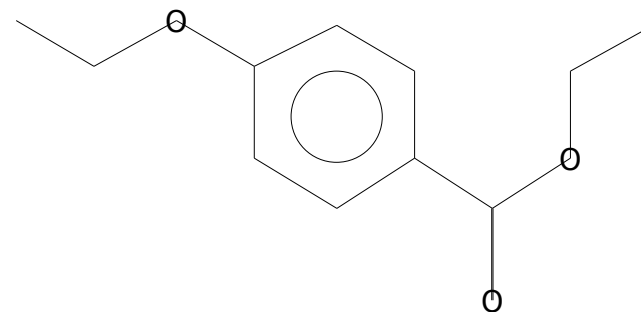

Peak True - sample "Lipid BM 3 F1:1", peak 866, at 995.274 , 0.983 sec , sec (Spec # 60039)

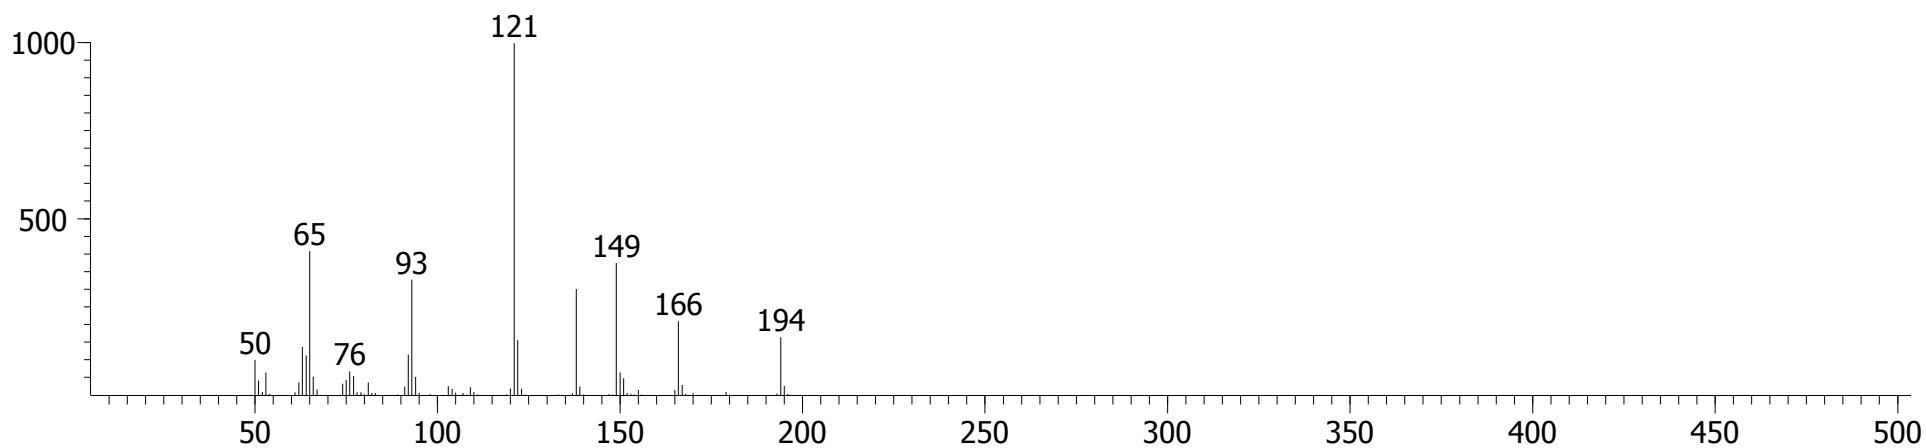

Library Hit - similarity 892, "Benzoic acid, 4-ethoxy-, ethyl ester"

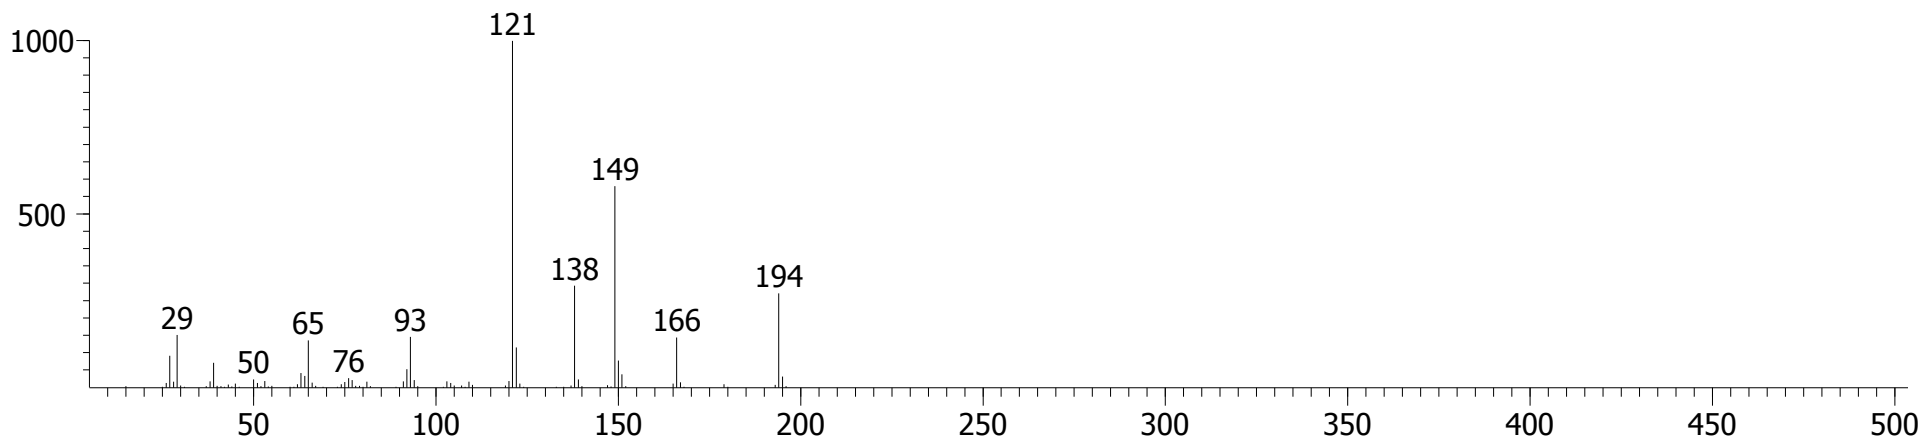

Sample 3, Fraction 1 (Hexane/DCM)

o-Hydroxybiphenyl

CAS # = 90-43-7  
1st Dimension R.T. = 1002.27  
2nd Dimension R.T. = 1.049  
Quant Mass(es) = 170  
S/N = 1209.8  
Area = 39939  
Height = 7622.2

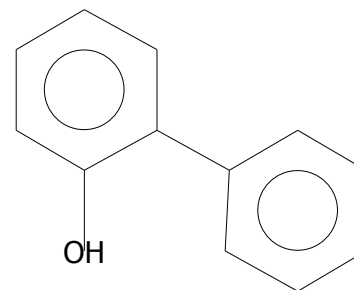

Peak True - sample "Lipid BM 3 F1:1", peak 891, at 1002.27 , 1.049 sec , sec (Spec # 61109)

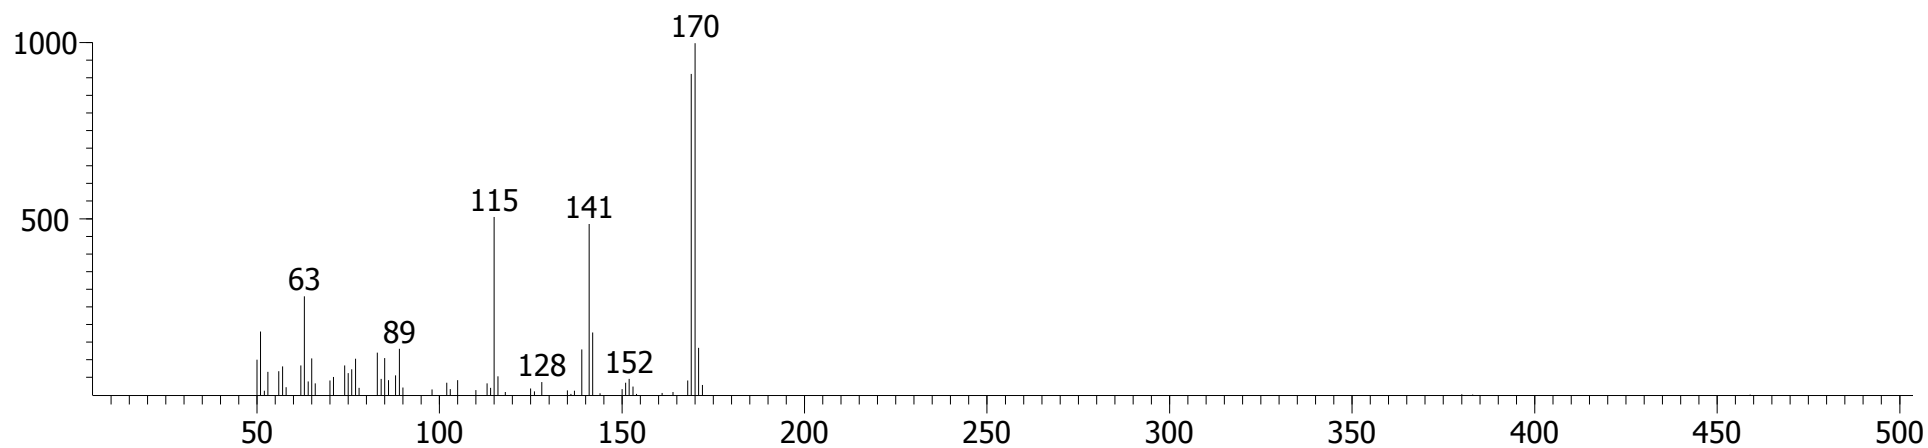

Library Hit - similarity 932, "o-Hydroxybiphenyl"

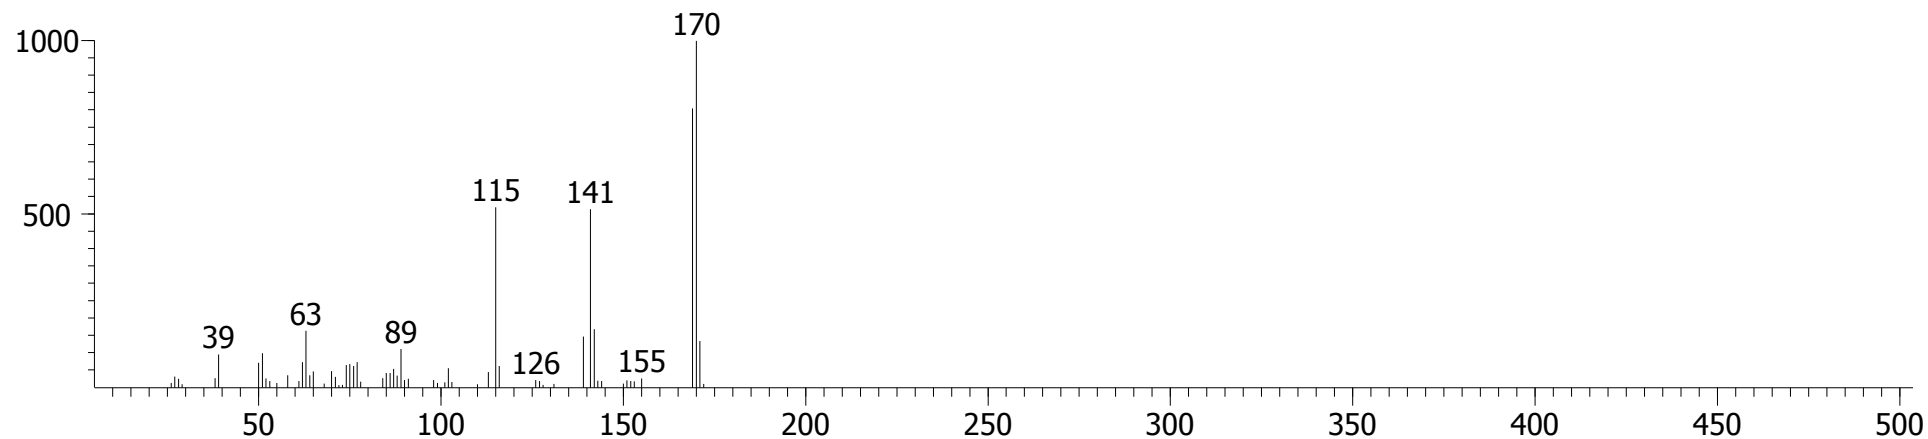

Sample 3, Fraction 1 (Hexane/DCM)

Dibenzofuran

CAS # = 132-64-9  
1st Dimension R.T. = 1009.27  
2nd Dimension R.T. = 1.036  
Quant Mass(es) = 168  
S/N = 500.95  
Area = 38917  
Height = 6699.9



Peak True - sample "Lipid BM 3 F1:1", peak 913, at 1009.27 , 1.036 sec , sec (Spec # 62167)

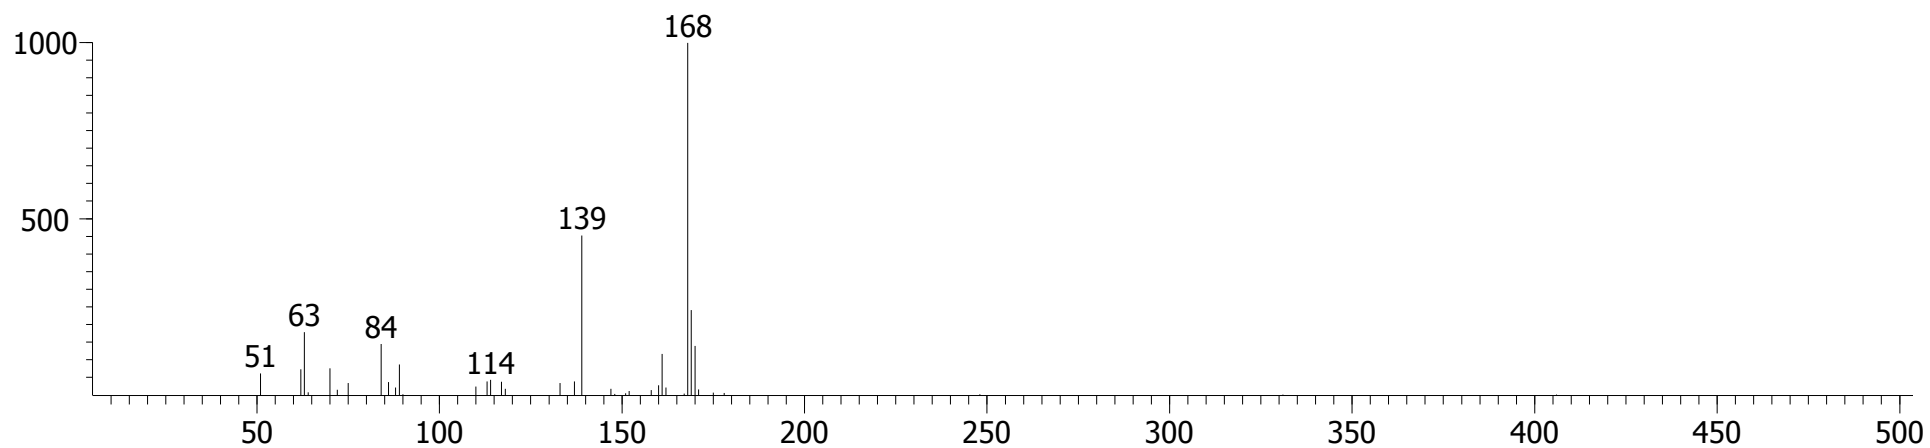

Library Hit - similarity 786, "Dibenzofuran"

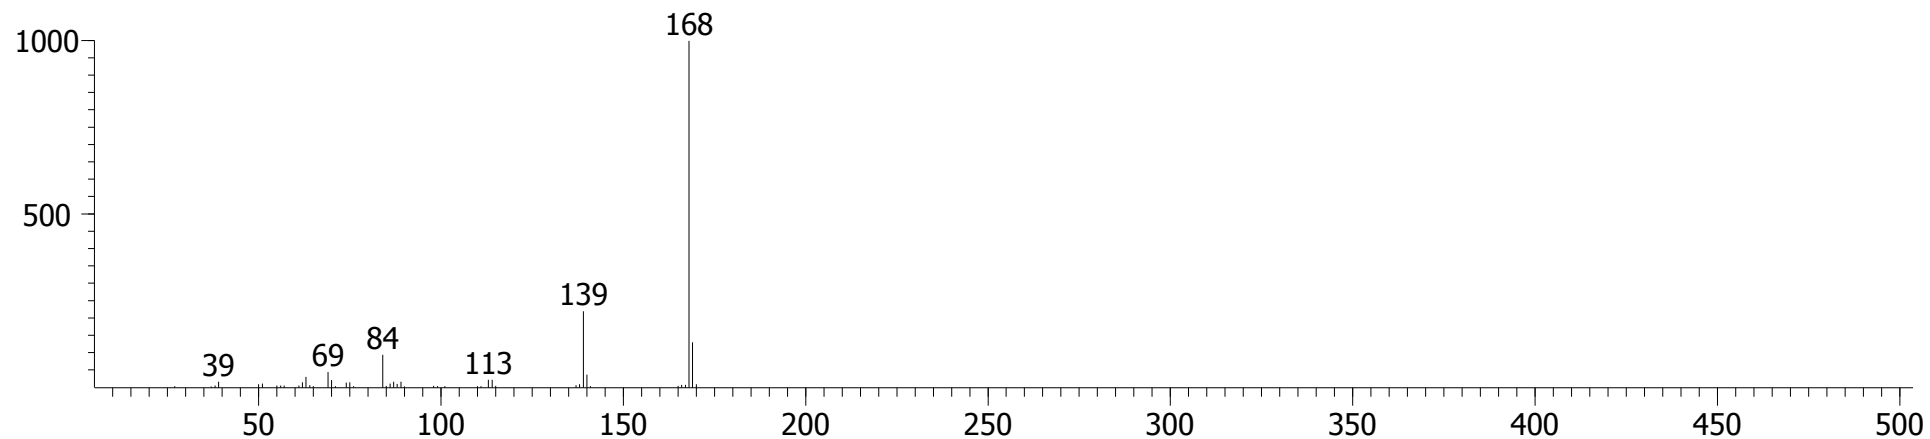

Sample 3, Fraction 1 (Hexane/DCM)

Naphthalene, 1,4,5-trimethyl-

CAS # = 2131-41-1  
1st Dimension R.T. = 1016.26  
2nd Dimension R.T. = 0.983  
Quant Mass(es) = 170  
S/N = 942.88  
Area = 99075  
Height = 17058



(1,4,5-Trimethylnaphthalene)

Peak True - sample "Lipid BM 3 F1:1", peak 938, at 1016.26 , 0.983 sec , sec (Spec # 63219)

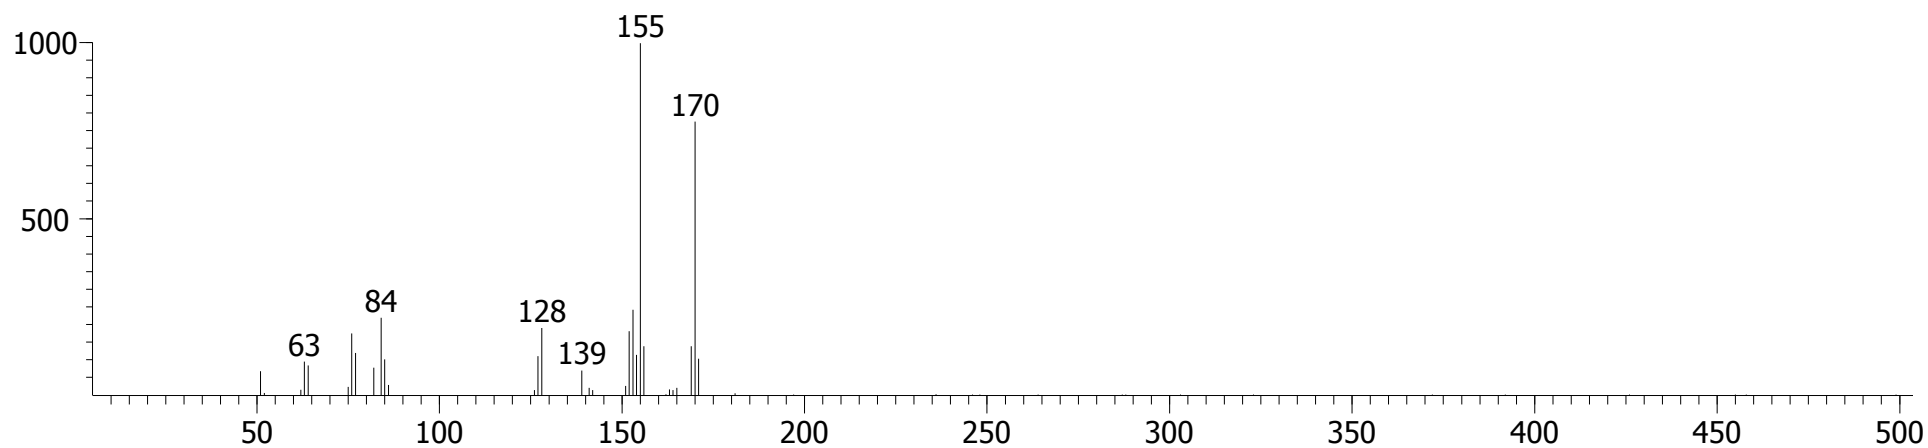

Library Hit - similarity 863, "Naphthalene, 1,4,5-trimethyl-"



Sample 3, Fraction 1 (Hexane/DCM)

4-Chloroformanilide

(N-(4-Chlorophenyl)formamide)

CAS # = 2617-79-0  
1st Dimension R.T. = 1019.76  
2nd Dimension R.T. = 1.129  
Quant Mass(es) = 155  
S/N = 427.01  
Area = 25033  
Height = 4555.3



Peak True - sample "Lipid BM 3 F1:1", peak 957, at 1019.76 , 1.129 sec , sec (Spec # 63771)

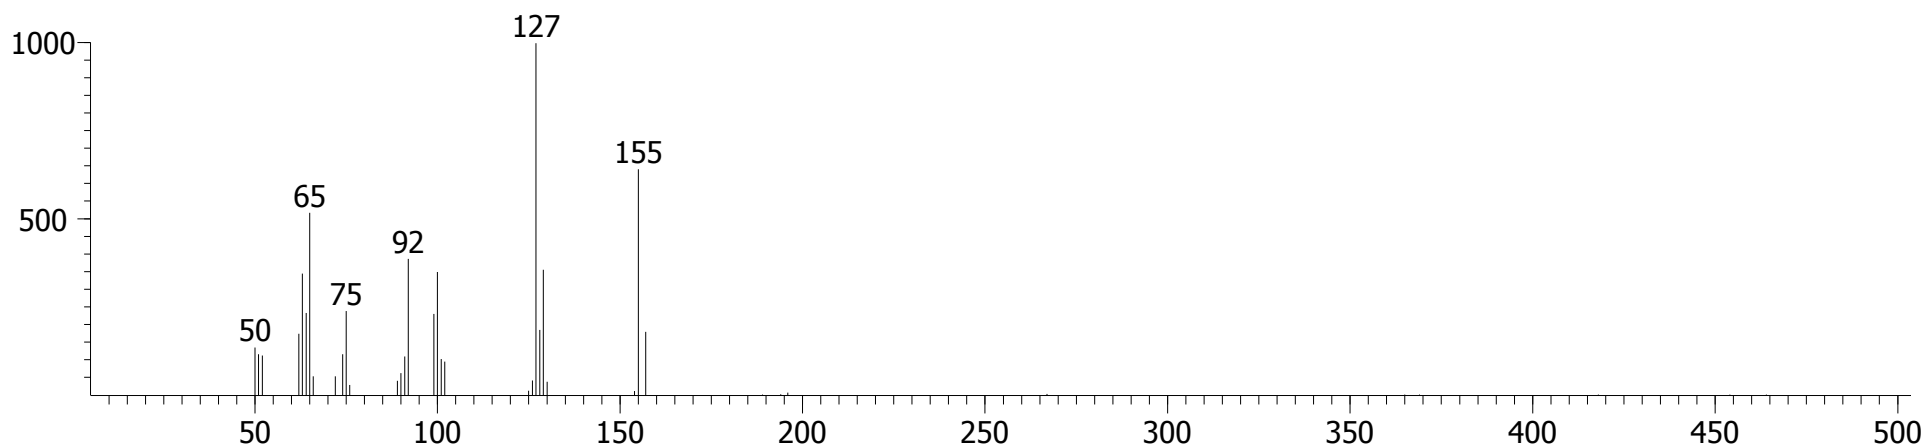

Library Hit - similarity 909, "4-Chloroformanilide"



Sample 3, Fraction 1 (Hexane/DCM)

Benzene, 1-chloro-4-phenoxy-

(4-Chlorodiphenyl ether)

CAS # = 7005-72-3  
1st Dimension R.T. = 1058.24  
2nd Dimension R.T. = 1.010  
Quant Mass(es) = 204  
S/N = 3075.3  
Area = 122231  
Height = 23357

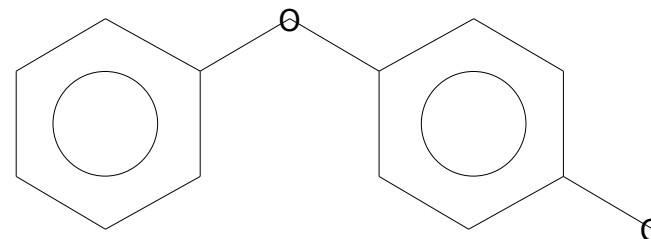

Peak True - sample "Lipid BM 3 F1:1", peak 1089, at 1058.24 , 1.010 sec , sec (Spec # 69583)

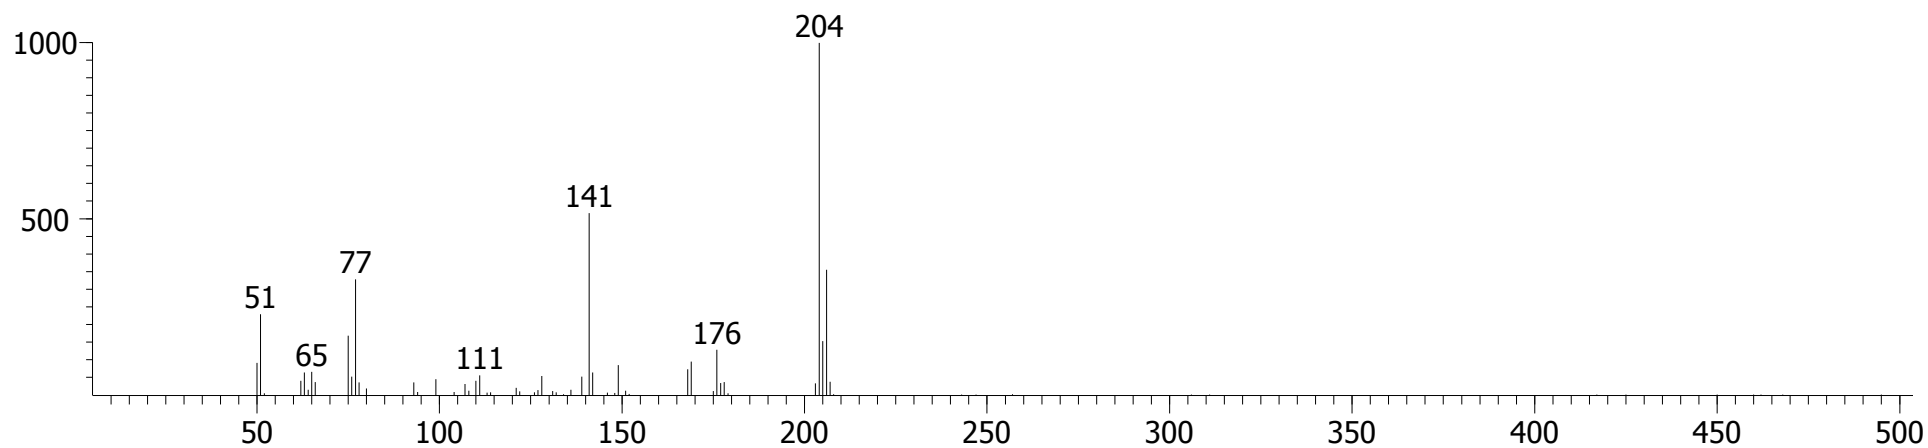

Library Hit - similarity 881, "Benzene, 1-chloro-4-phenoxy-"



Sample 3, Fraction 1 (Hexane/DCM)

Acetamide, N-(3-chlorophenyl)-

CAS # = 588-07-8  
1st Dimension R.T. = 1065.23  
2nd Dimension R.T. = 1.109  
Quant Mass(es) = 169  
S/N = 741.30  
Area = 16701  
Height = 1815.4

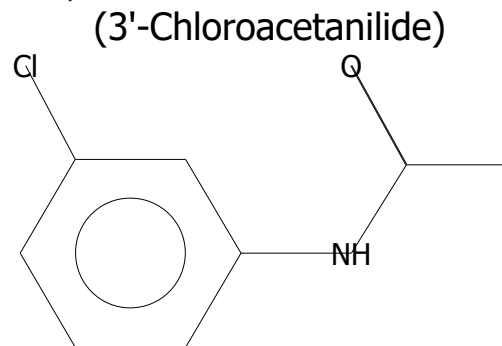

Peak True - sample "Lipid BM 3 F1:1", peak 1115, at 1065.23 , 1.109 sec , sec (Spec # 70658)

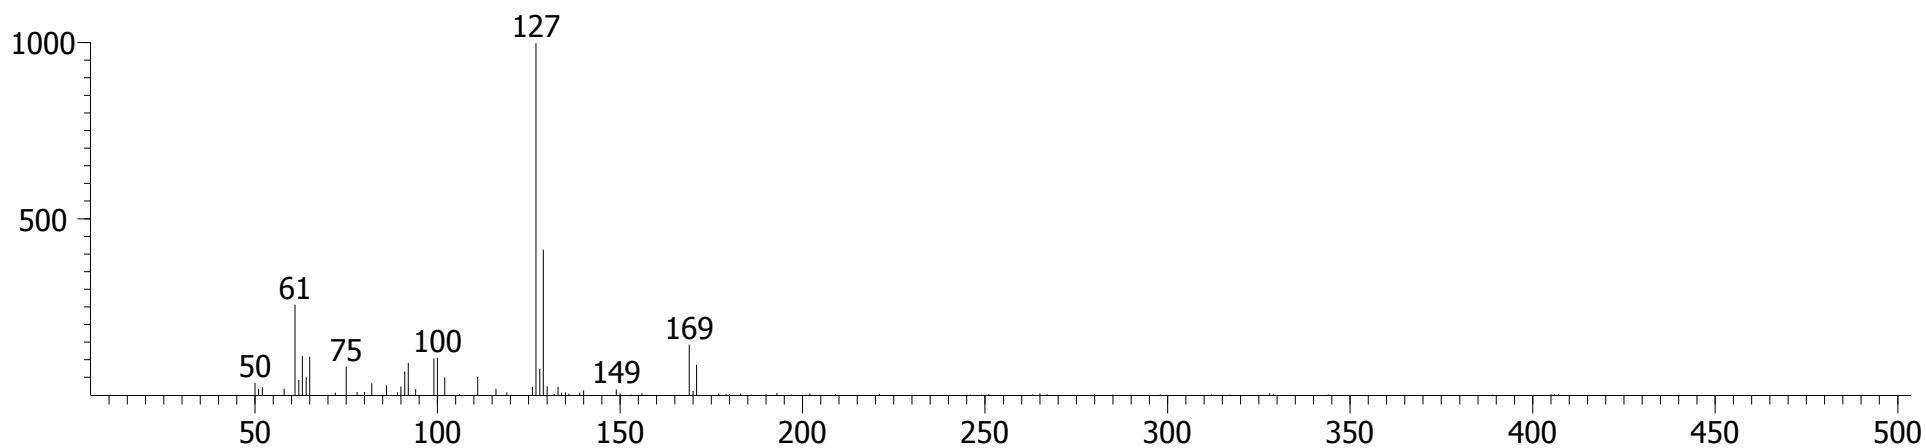

Library Hit - similarity 859, "Acetamide, N-(3-chlorophenyl)-"

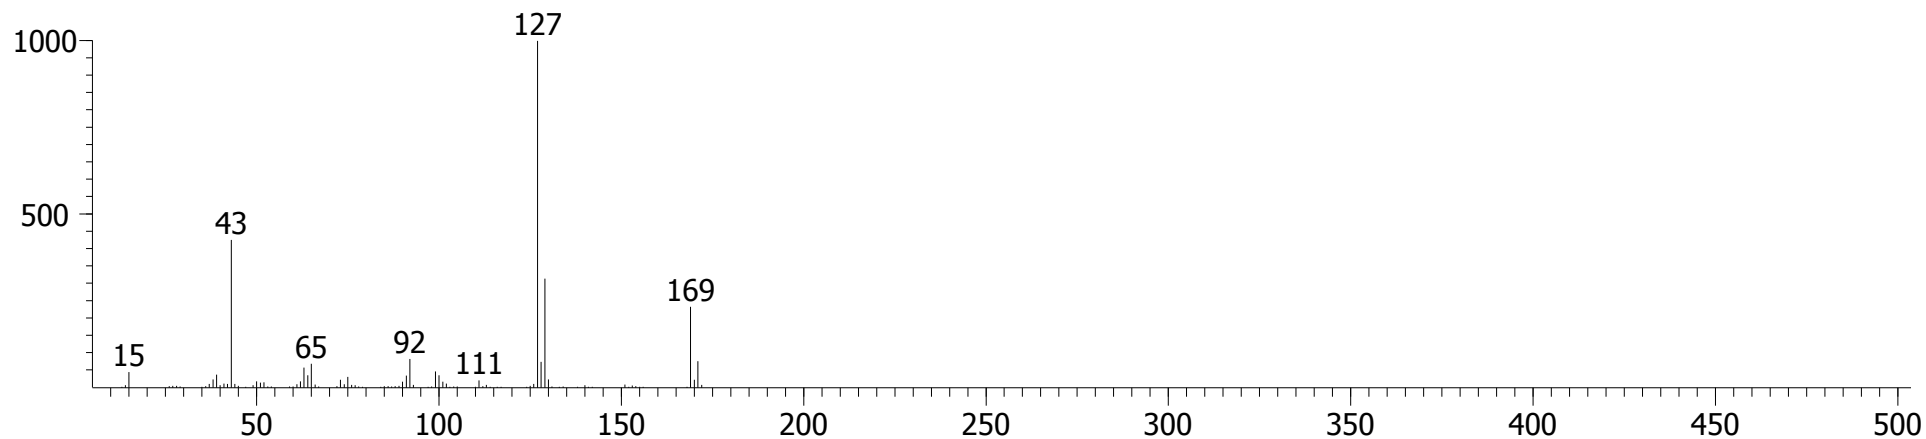



# Sample 3, Fraction 1 (Hexane/DCM)

## Benzophenone

CAS # = 119-61-9  
1st Dimension R.T. = 1082.72  
2nd Dimension R.T. = 1.069  
Quant Mass(es) = 182  
S/N = 6817.8  
Area = 655777  
Height = 105520



Peak True - sample "Lipid BM 3 F1:1", peak 1184, at 1082.72 , 1.069 sec , sec (Spec # 73302)

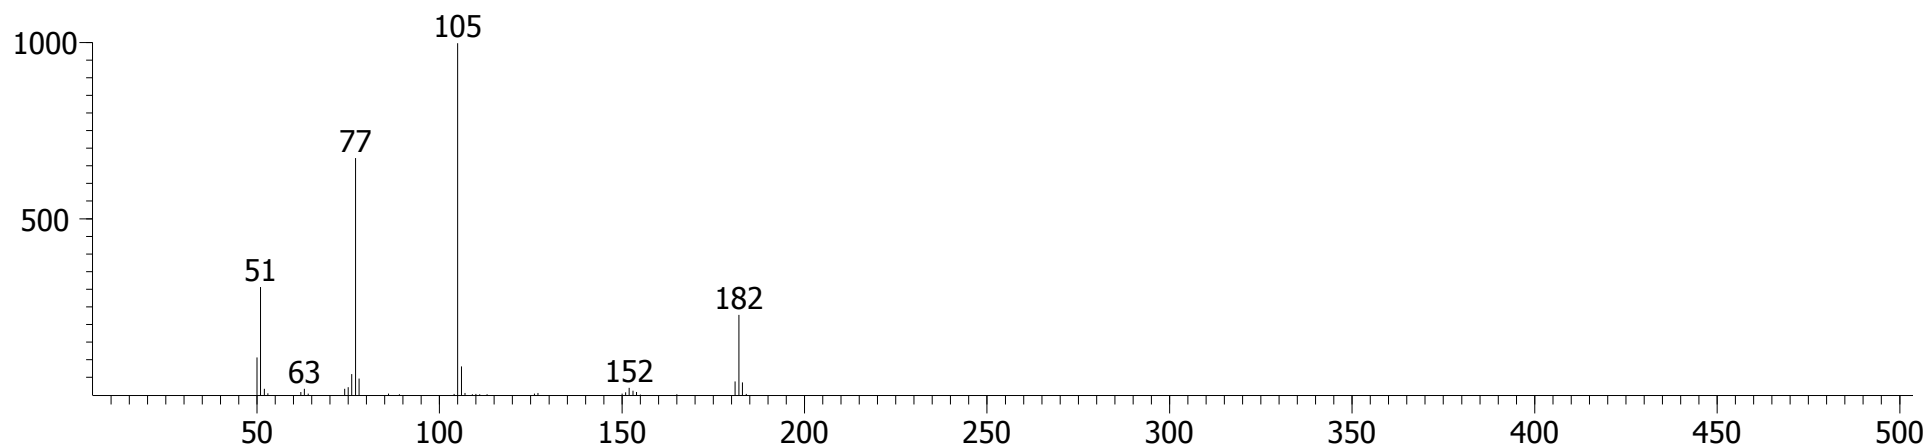

Library Hit - similarity 908, "Benzophenone"

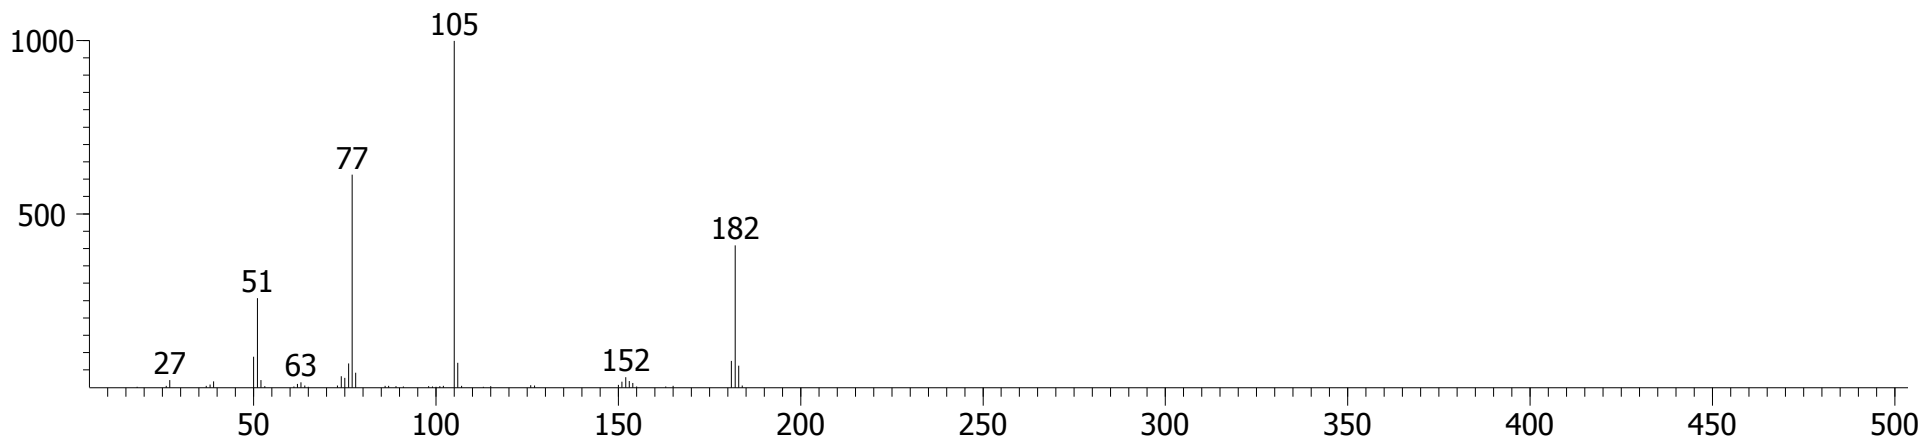

Sample 3, Fraction 1 (Hexane/DCM)

Benzene, 1,1'-[oxybis(methylene)]bis-

CAS # = 103-50-4  
1st Dimension R.T. = 1093.22  
2nd Dimension R.T. = 1.036  
Quant Mass(es) = 107  
S/N = 1368.0  
Area = 92673  
Height = 11688

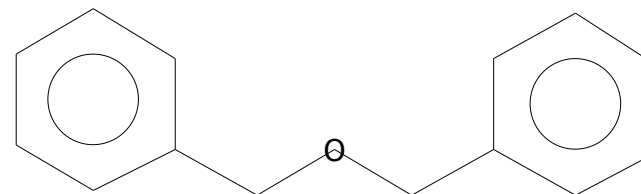

Peak True - sample "Lipid BM 3 F1:1", peak 1227, at 1093.22 , 1.036 sec , sec (Spec # 74887)

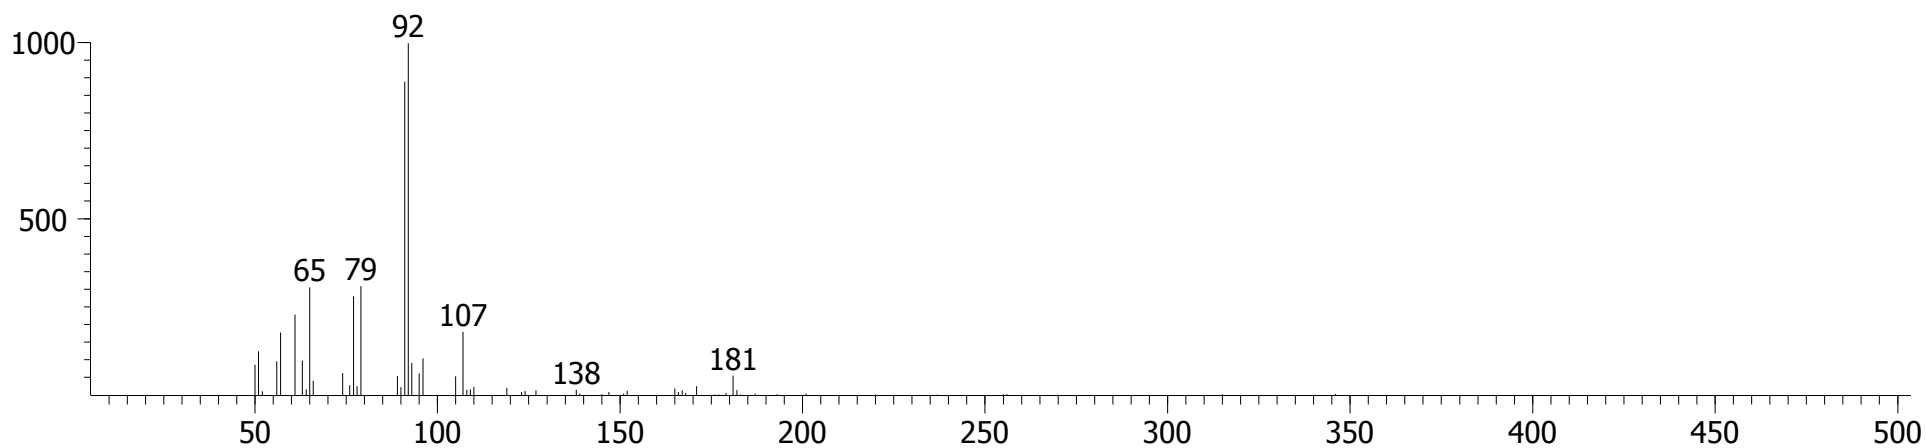

Library Hit - similarity 792, "Benzene, 1,1'-[oxybis(methylene)]bis-"

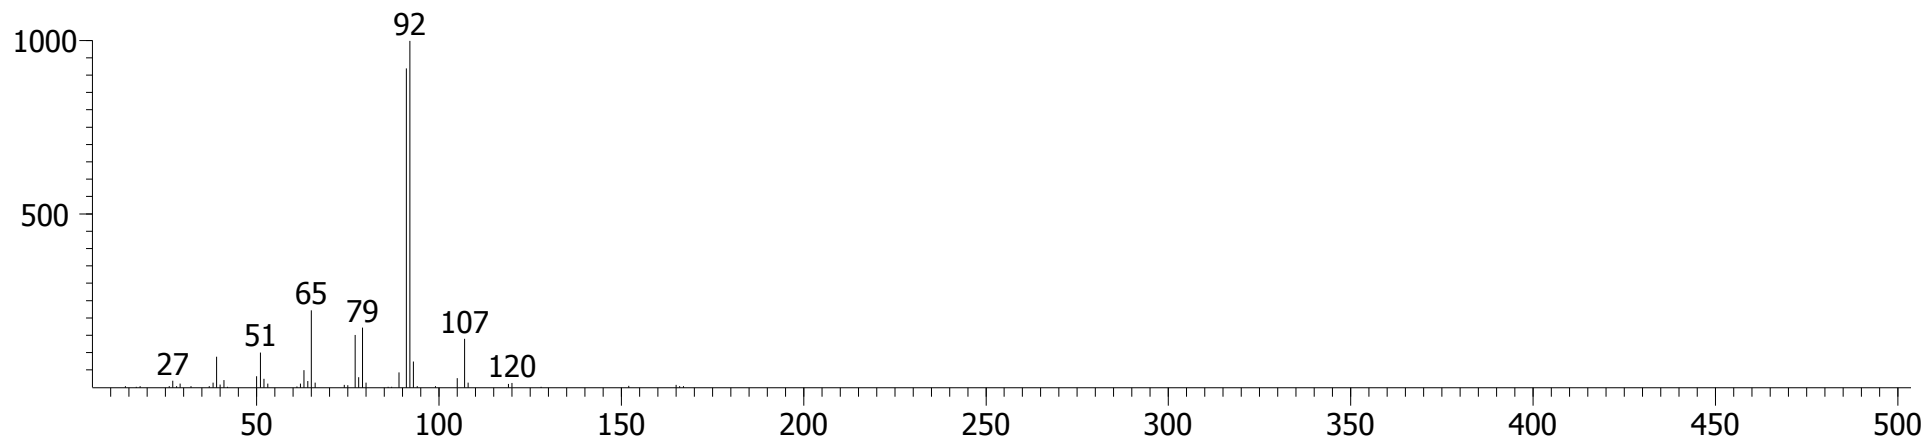

Sample 3, Fraction 1 (Hexane/DCM)

2(3H)-Benzothiazolone

CAS # = 934-34-9  
1st Dimension R.T. = 1135.19  
2nd Dimension R.T. = 1.188  
Quant Mass(es) = 151  
S/N = 147.11  
Area = 15770  
Height = 2272.5

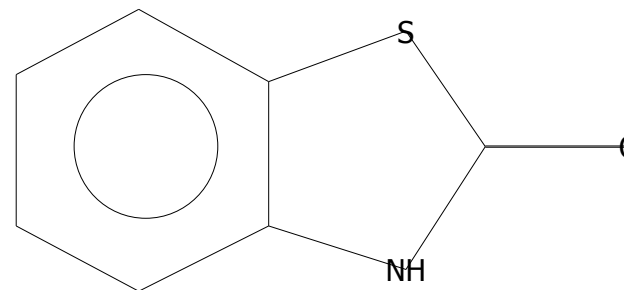

Peak True - sample "Lipid BM 3 F1:1", peak 1385, at 1135.19 , 1.188 sec , sec (Spec # 81270)

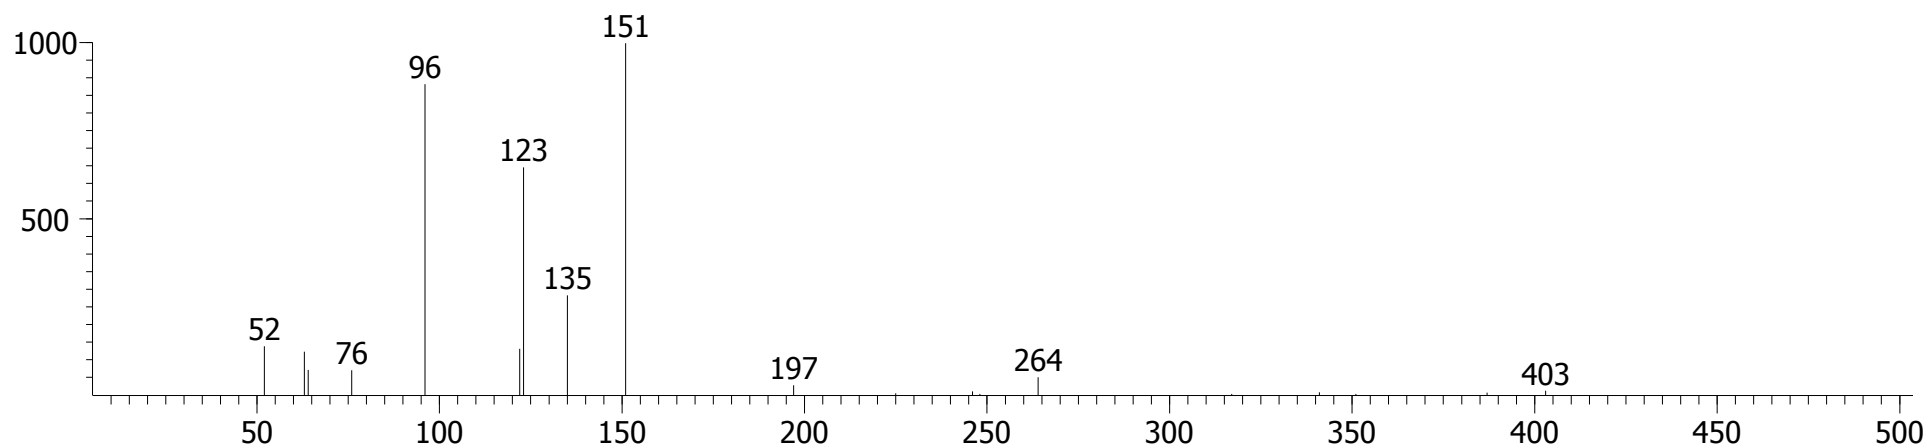

Library Hit - similarity 789, "2(3H)-Benzothiazolone"

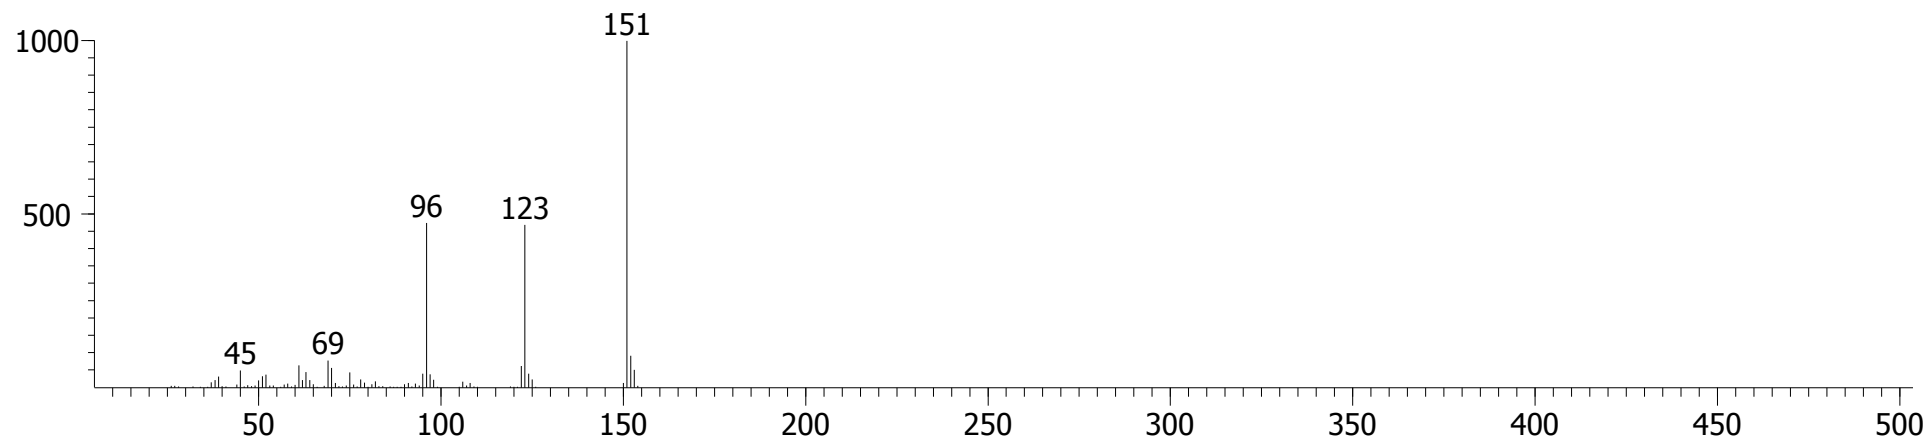

Sample 3, Fraction 1 (Hexane/DCM)

9H-Fluorene, 9-methyl-

CAS # = 2523-37-7  
1st Dimension R.T. = 1138.69  
2nd Dimension R.T. = 1.036  
Quant Mass(es) = 180  
S/N = 135.74  
Area = 17703  
Height = 1357.2

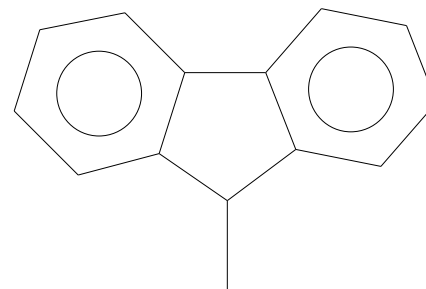

Peak True - sample "Lipid BM 3 F1:1", peak 1395, at 1138.69 , 1.036 sec , sec (Spec # 81777)

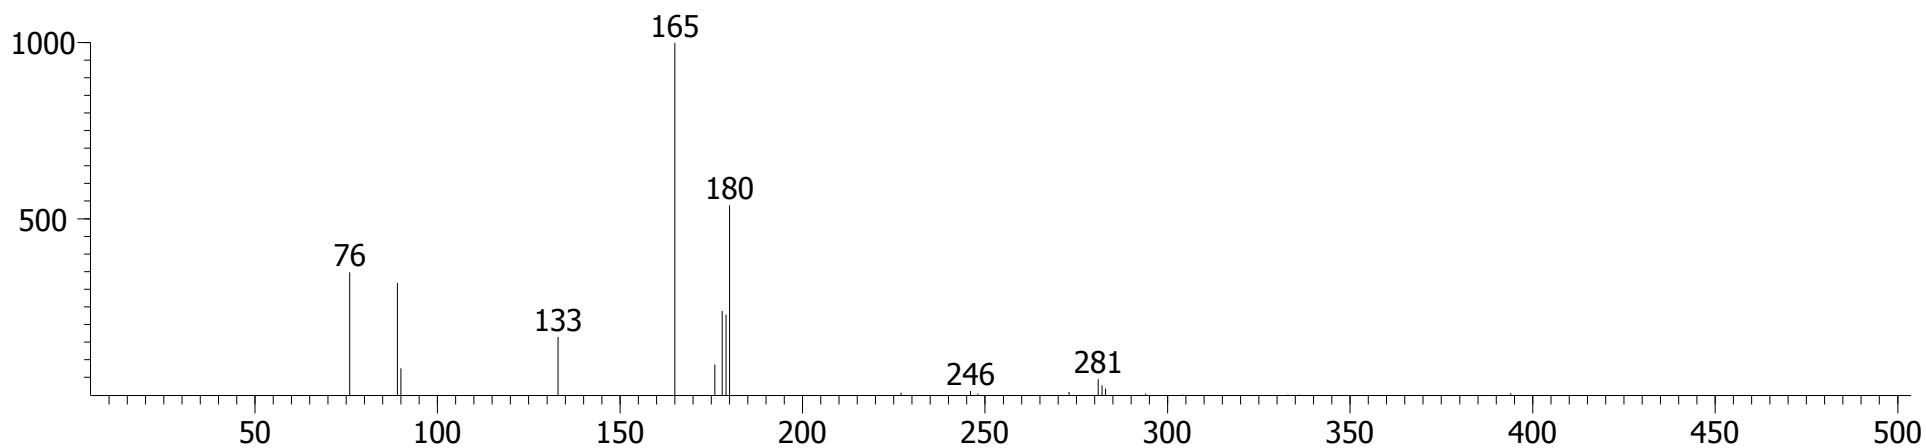

Library Hit - similarity 809, "9H-Fluorene, 9-methyl-"

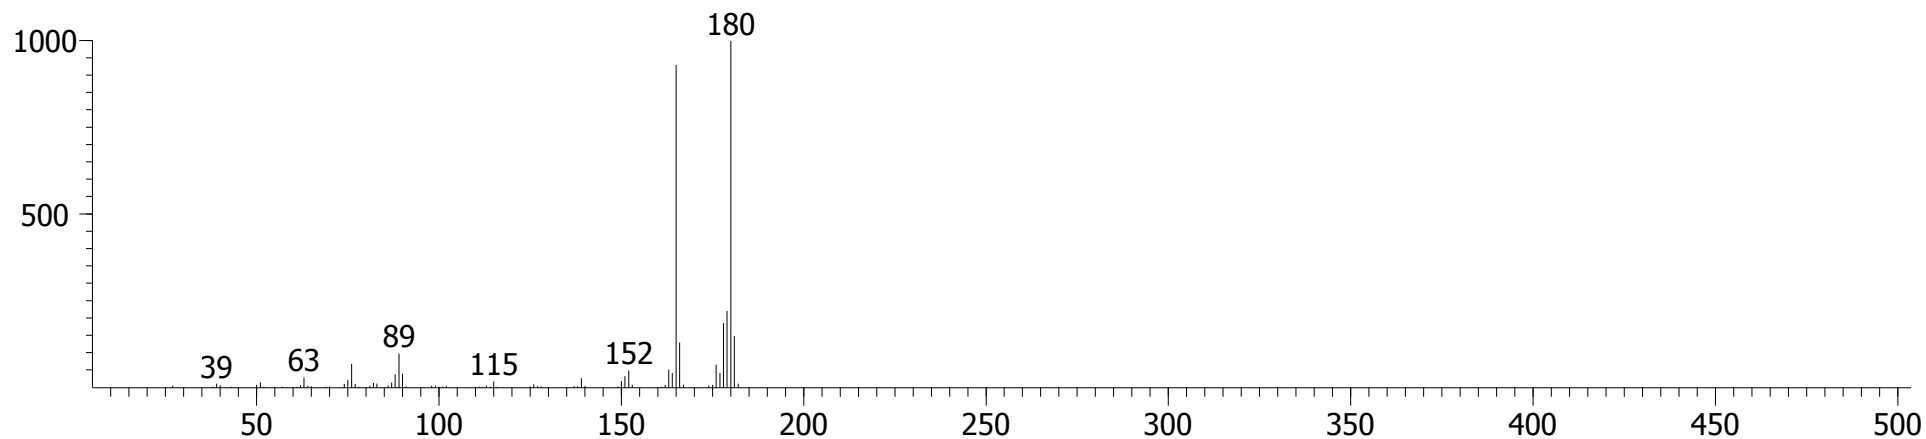

Sample 3, Fraction 1 (Hexane/DCM)

Benzene, hexachloro-

CAS # = 118-74-1  
1st Dimension R.T. = 1149.19  
2nd Dimension R.T. = 1.016  
Quant Mass(es) = 284  
S/N = 264.40  
Area = 15180  
Height = 2739.6



(HCB)

Peak True - sample "Lipid BM 3 F1:1", peak 1439, at 1149.19 , 1.016 sec , sec (Spec # 83364)

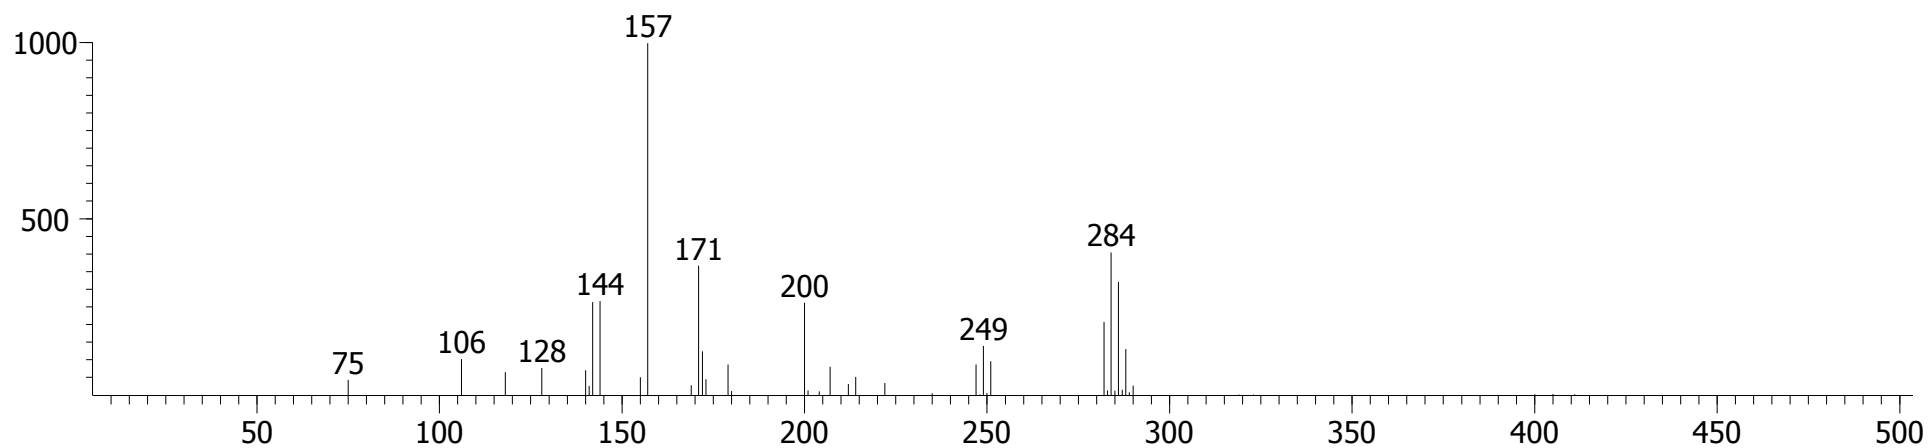

Library Hit - similarity 632, "Benzene, hexachloro-"



Sample 3, Fraction 1 (Hexane/DCM)

3,5-di-tert-Butyl-4-hydroxybenzaldehyde

CAS # = 1620-98-0  
1st Dimension R.T. = 1166.68  
2nd Dimension R.T. = 1.003  
Quant Mass(es) = 234  
S/N = 2964.5  
Area = 98864  
Height = 14773



Peak True - sample "Lipid BM 3 F1:1", peak 1502, at 1166.68 , 1.003 sec , sec (Spec # 86012)

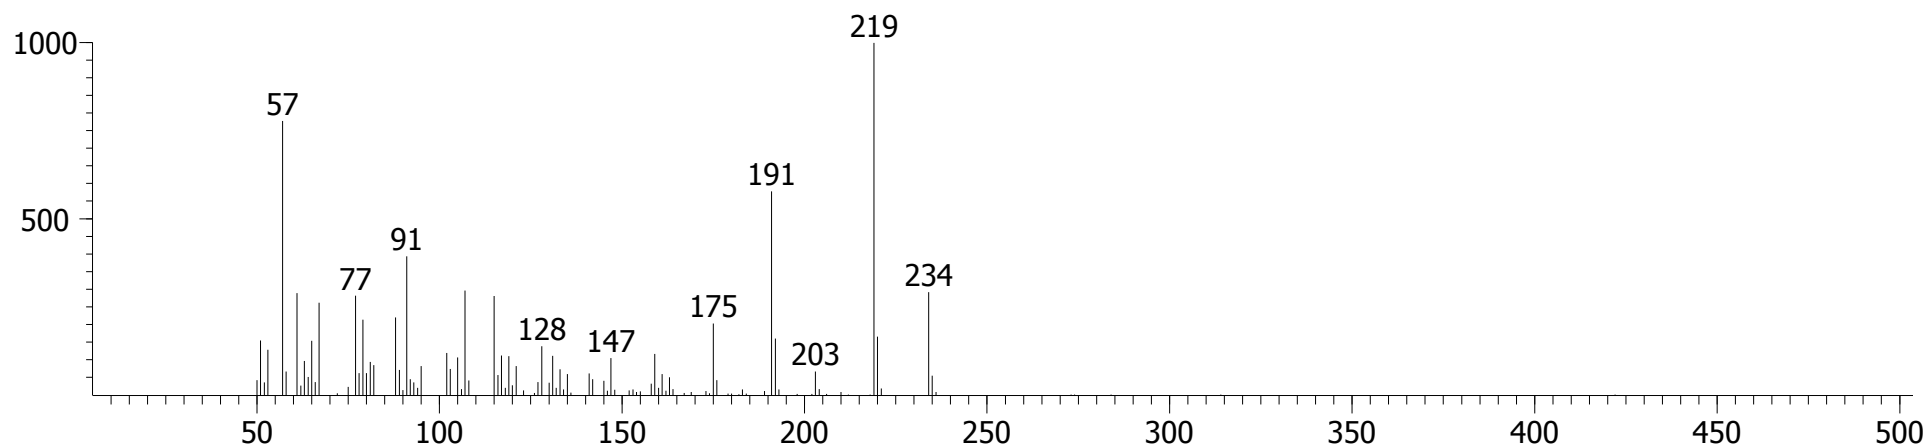

Library Hit - similarity 832, "3,5-di-tert-Butyl-4-hydroxybenzaldehyde"

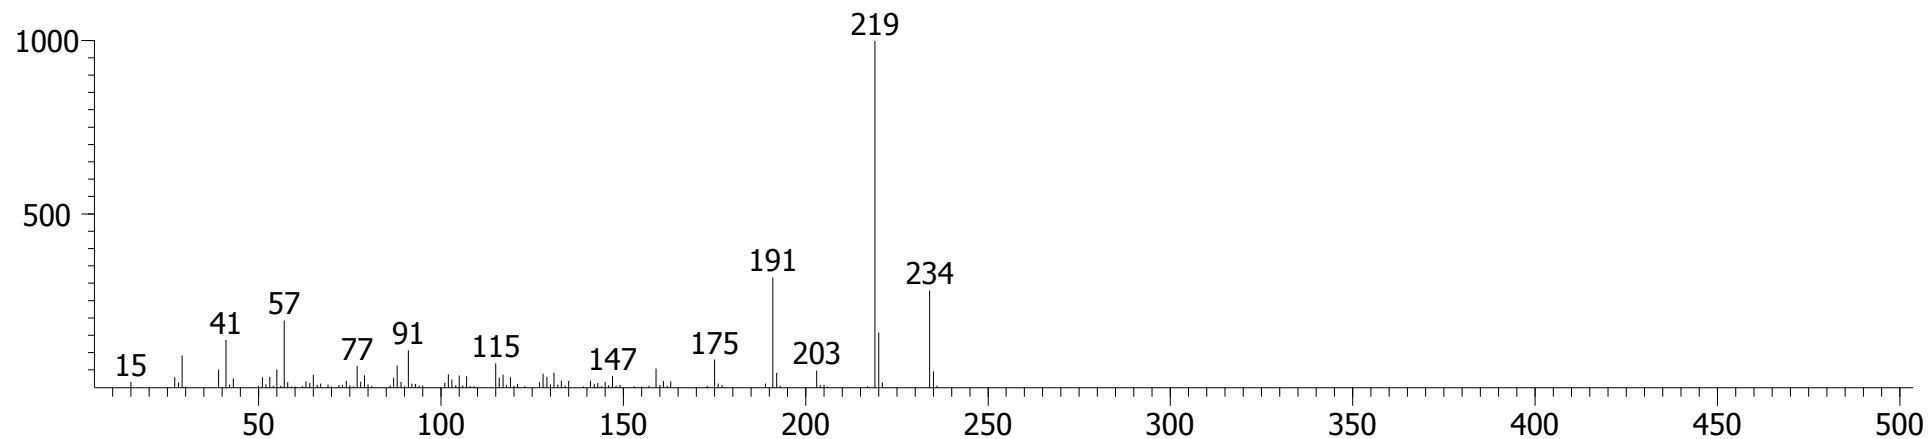

Sample 3, Fraction 1 (Hexane/DCM)

Benzene, 1,1'-oxybis[4-chloro-

(4,4'-Dichlorodiphenylether)

CAS # = 2444-89-5  
1st Dimension R.T. = 1191.16  
2nd Dimension R.T. = 1.043  
Quant Mass(es) = 238  
S/N = 951.47  
Area = 56122  
Height = 8687.3

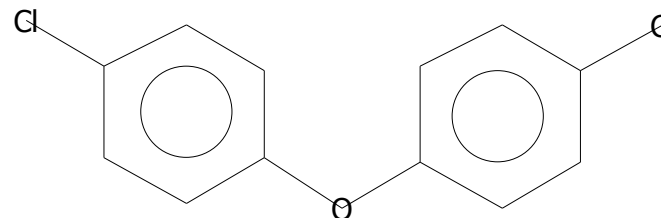

Peak True - sample "Lipid BM 3 F1:1", peak 1595, at 1191.16 , 1.043 sec , sec (Spec # 89728)

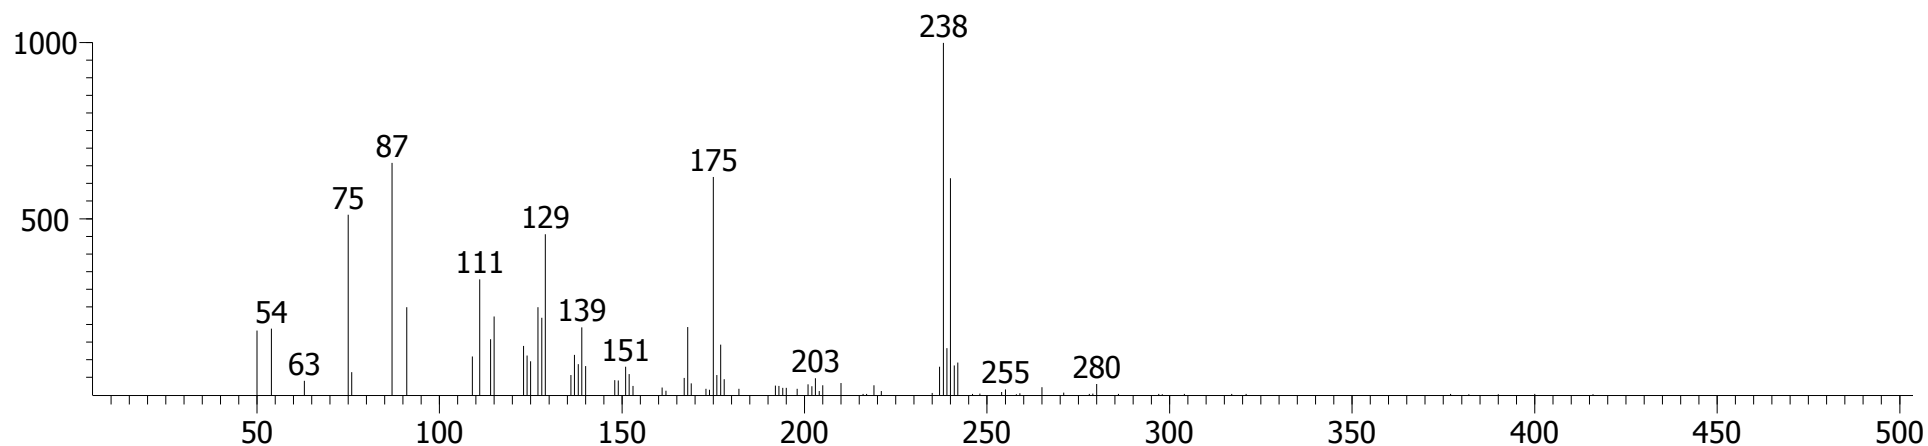

Library Hit - similarity 736, "Benzene, 1,1'-oxybis[4-chloro-"

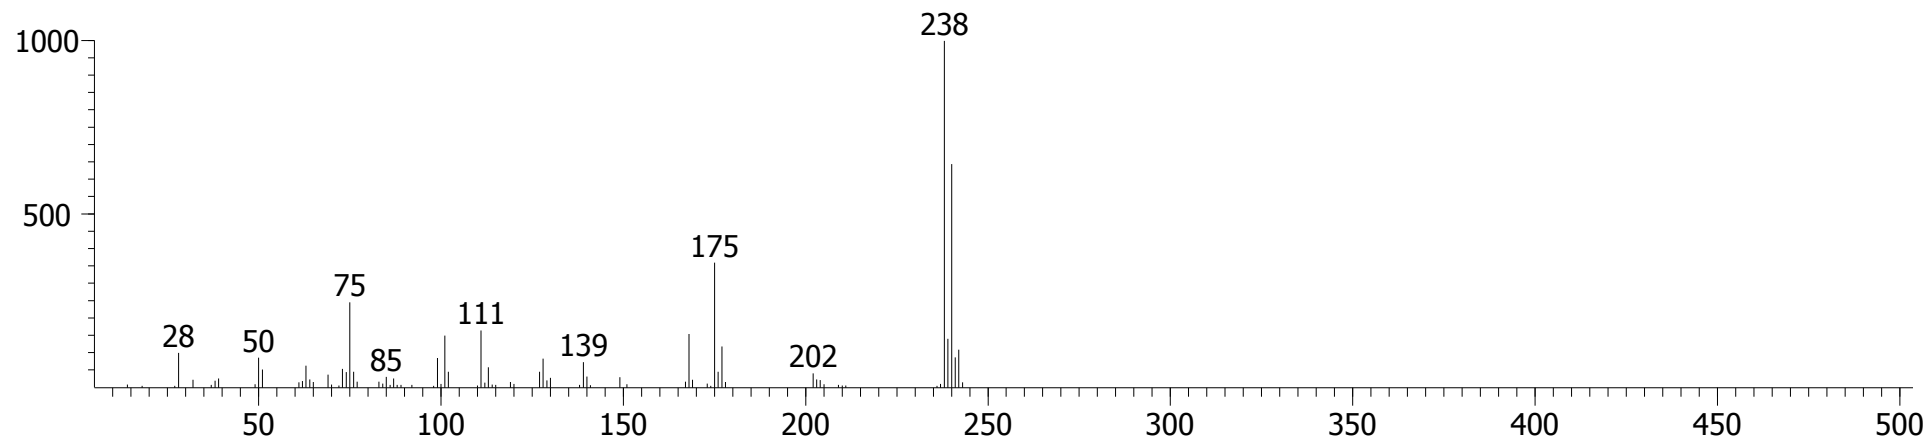

Sample 3, Fraction 1 (Hexane/DCM)

Benzene,

nethoxy-3-[3-(trimethylsilyl)methyl-3-buten

CAS # = 0-00-0

1st Dimension R.T. = 1194.66

2nd Dimension R.T. = 1.010

Quant Mass(es) = 233

S/N = 1451.8

Area = 63803

Height = 9566.7

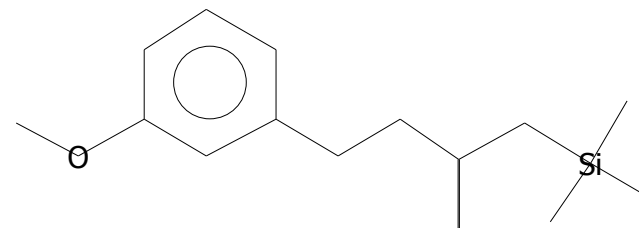

Peak True - sample "Lipid BM 3 F1:1", peak 1609, at 1194.66 , 1.010 sec , sec (Spec # 90253)

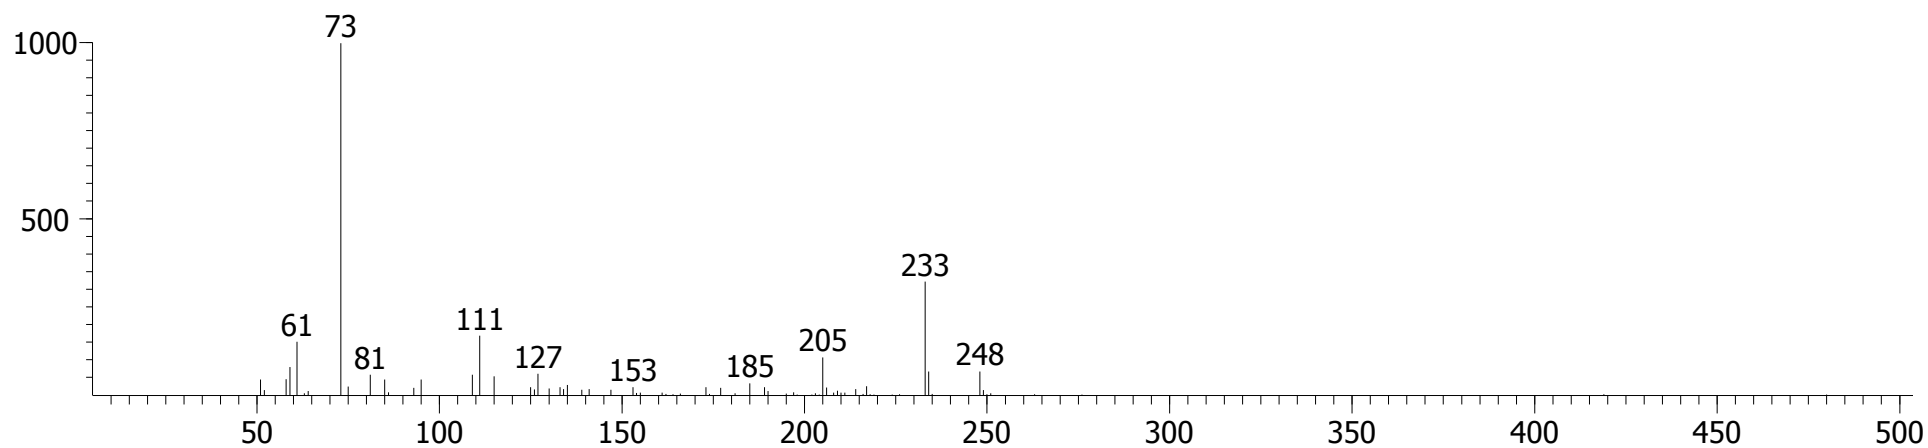

Library Hit - similarity 709, "Benzene, 1-methoxy-3-[3-(trimethylsilyl)methyl-3-butenyl]-"

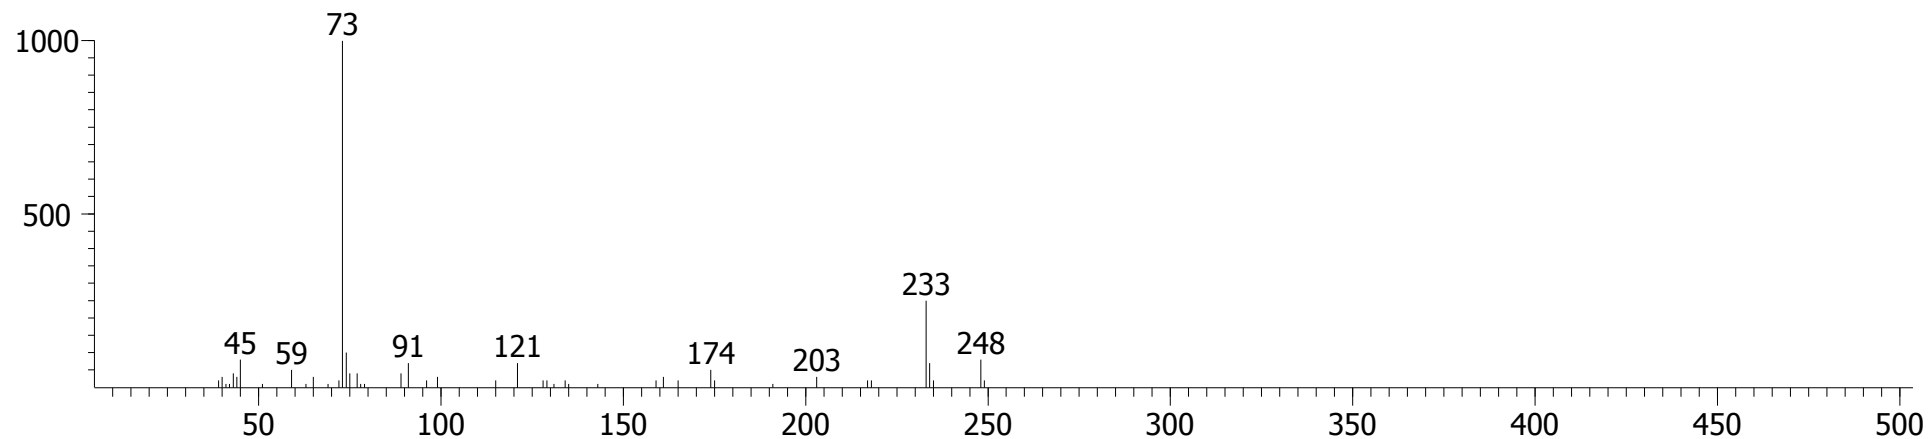



Sample 3, Fraction 1 (Hexane/DCM)

Phenanthrene

CAS # = 85-01-8  
1st Dimension R.T. = 1194.66  
2nd Dimension R.T. = 1.129  
Quant Mass(es) = 178  
S/N = 607.42  
Area = 55314  
Height = 8476.8



Peak True - sample "Lipid BM 3 F1:1", peak 1613, at 1194.66 , 1.129 sec , sec (Spec # 90271)

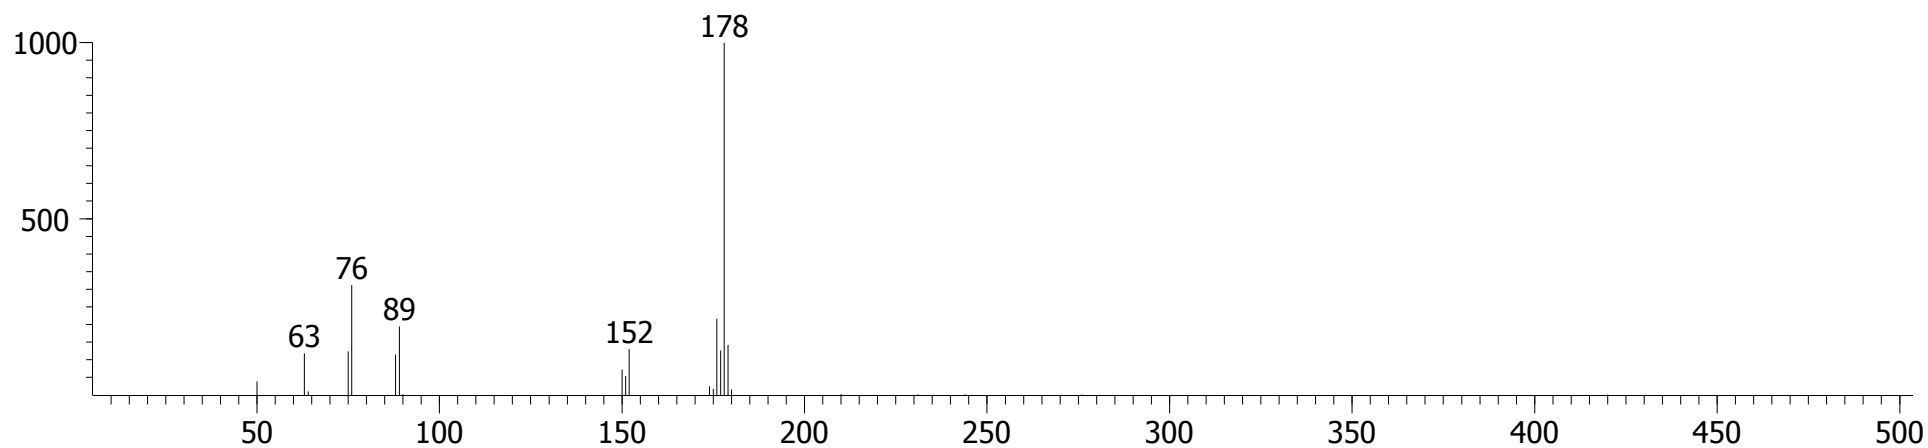

Library Hit - similarity 933, "Phenanthrene"

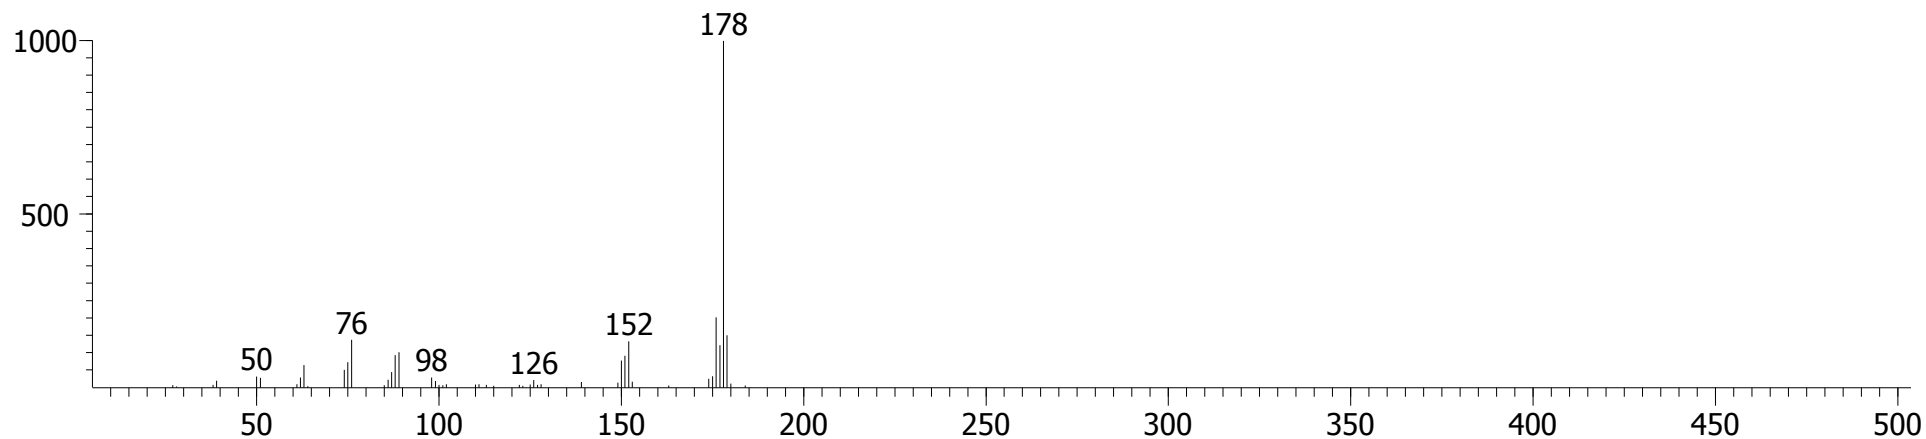

Sample 3, Fraction 1 (Hexane/DCM)

4,4'-Dichlorodiphenylsulphide

CAS # = 5181-10-2  
1st Dimension R.T. = 1299.6  
2nd Dimension R.T. = 1.109  
Quant Mass(es) = 254  
S/N = 528.78  
Area = 85365  
Height = 10249



Peak True - sample "Lipid BM 3 F1:1", peak 2005, at 1299.6 , 1.109 sec , sec (Spec # 106168)

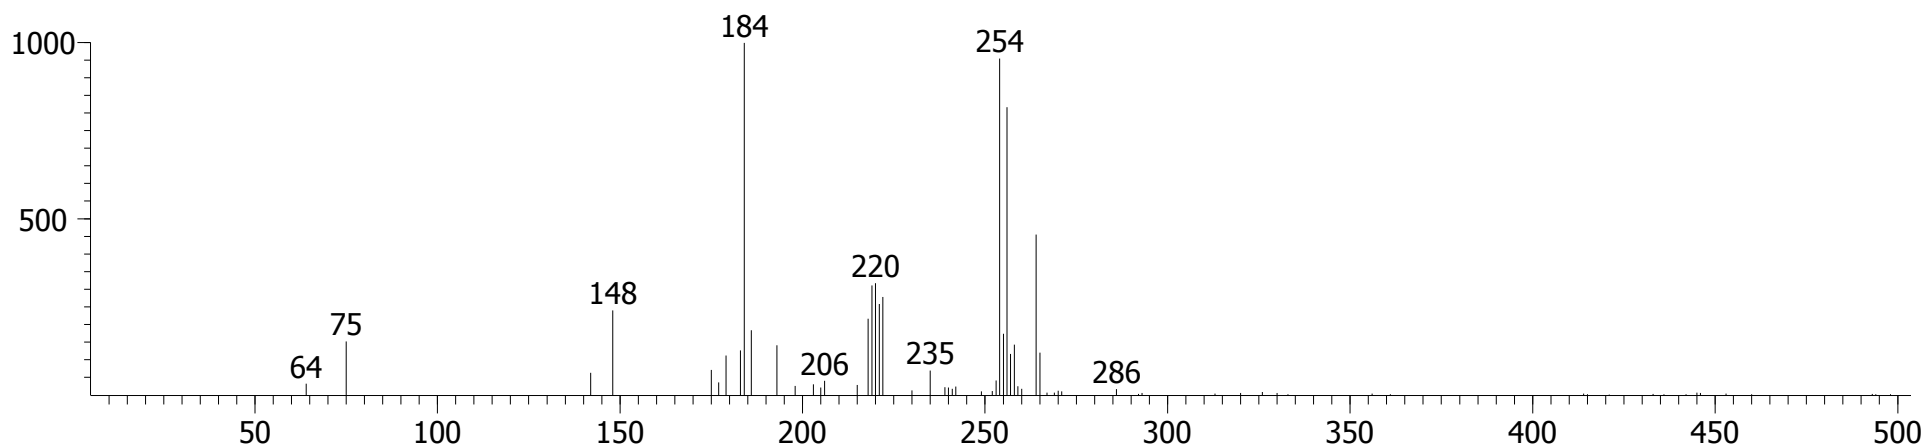

Library Hit - similarity 737, "4,4'-Dichlorodiphenylsulphide"

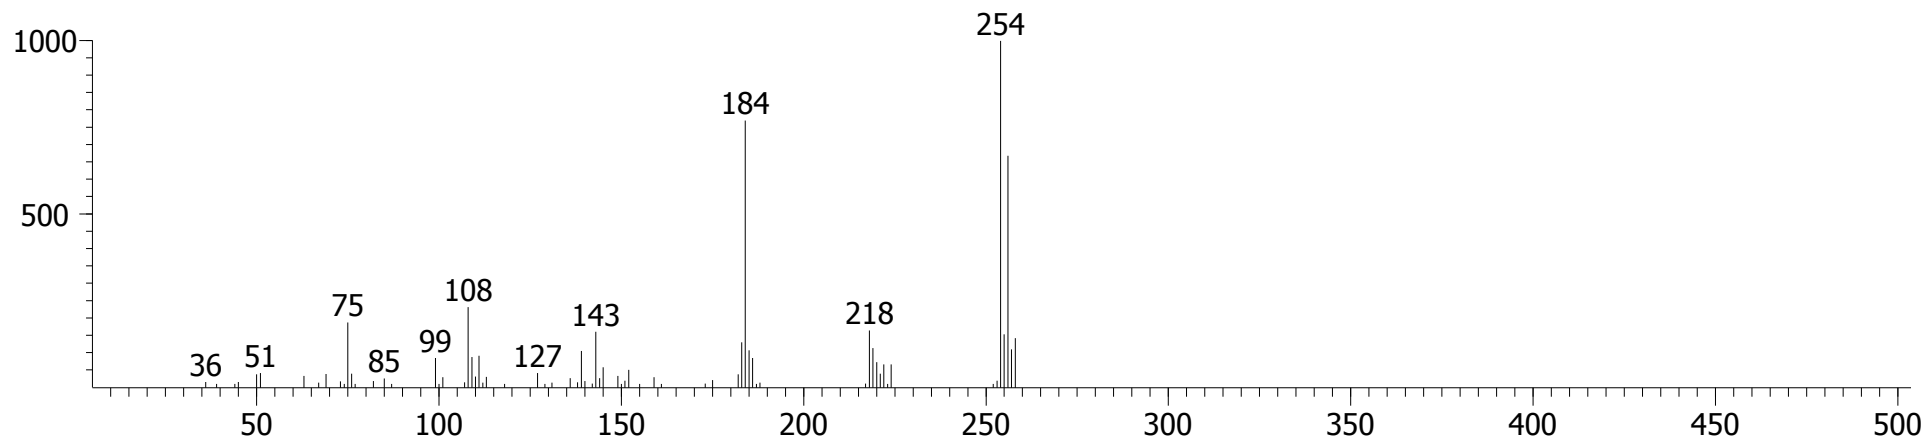

Sample 3, Fraction 1 (Hexane/DCM)

Benzyl butyl phthalate

CAS # = 85-68-7  
1st Dimension R.T. = 1491.99  
2nd Dimension R.T. = 1.228  
Quant Mass(es) = 206  
S/N = 1988.8  
Area = 58014  
Height = 5948.8



Peak True - sample "Lipid BM 3 F1:1", peak 2965, at 1491.99 , 1.228 sec , sec (Spec # 135336)

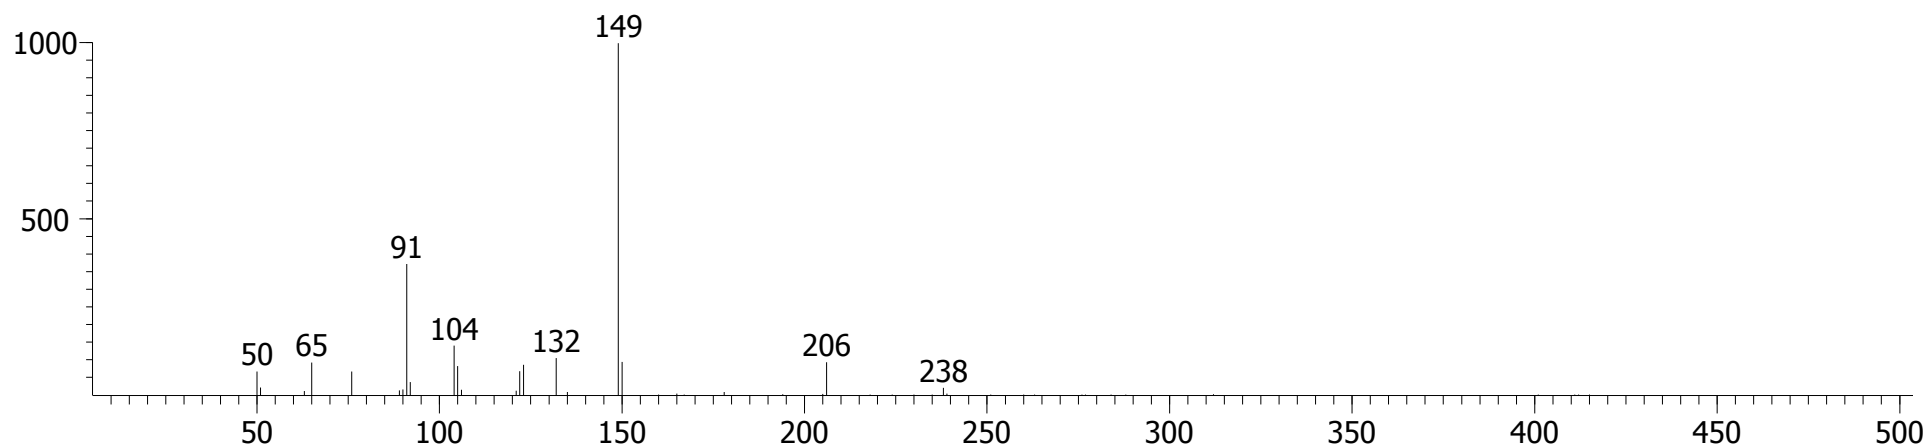

Library Hit - similarity 865, "Benzyl butyl phthalate"



Sample 3, Fraction 1 (Hexane/DCM)

Benzamide, N-propyl-

CAS # = 10546-70-0  
1st Dimension R.T. = 1540.96  
2nd Dimension R.T. = 1.274  
Quant Mass(es) = 163  
S/N = 82.575  
Area = 14454  
Height = 1747.9



Peak True - sample "Lipid BM 3 F1:1", peak 3133, at 1540.96 , 1.274 sec , sec (Spec # 142763)

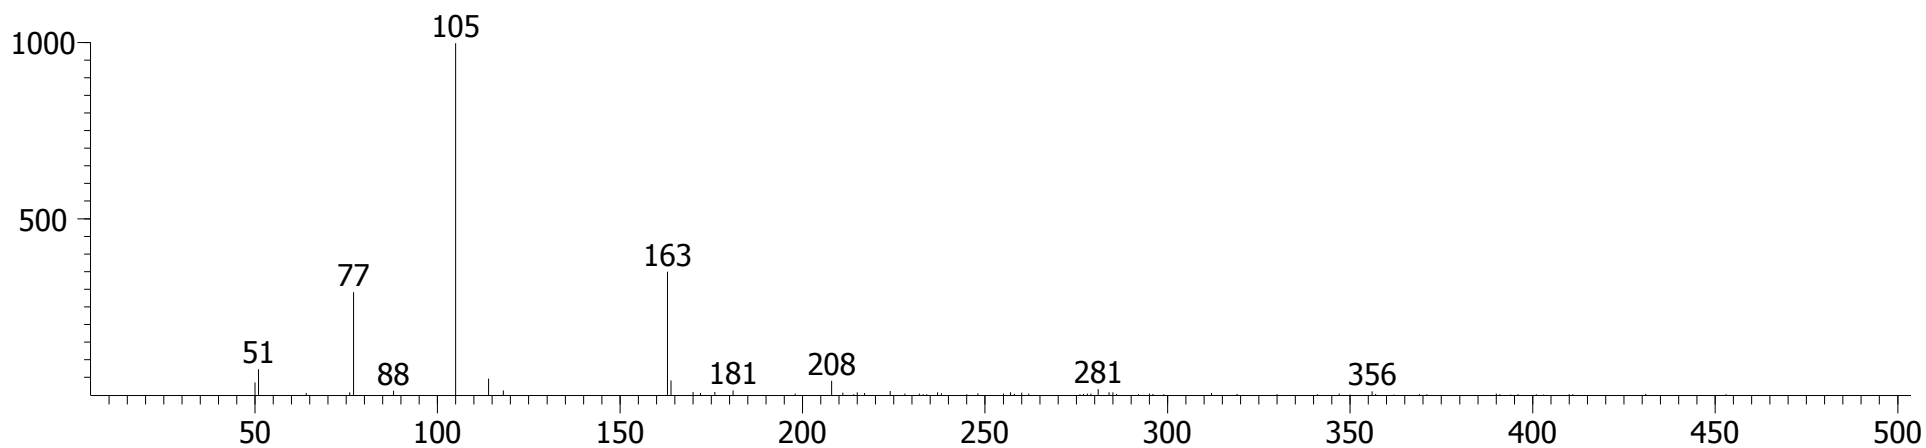

Library Hit - similarity 932, "Benzamide, N-propyl-"

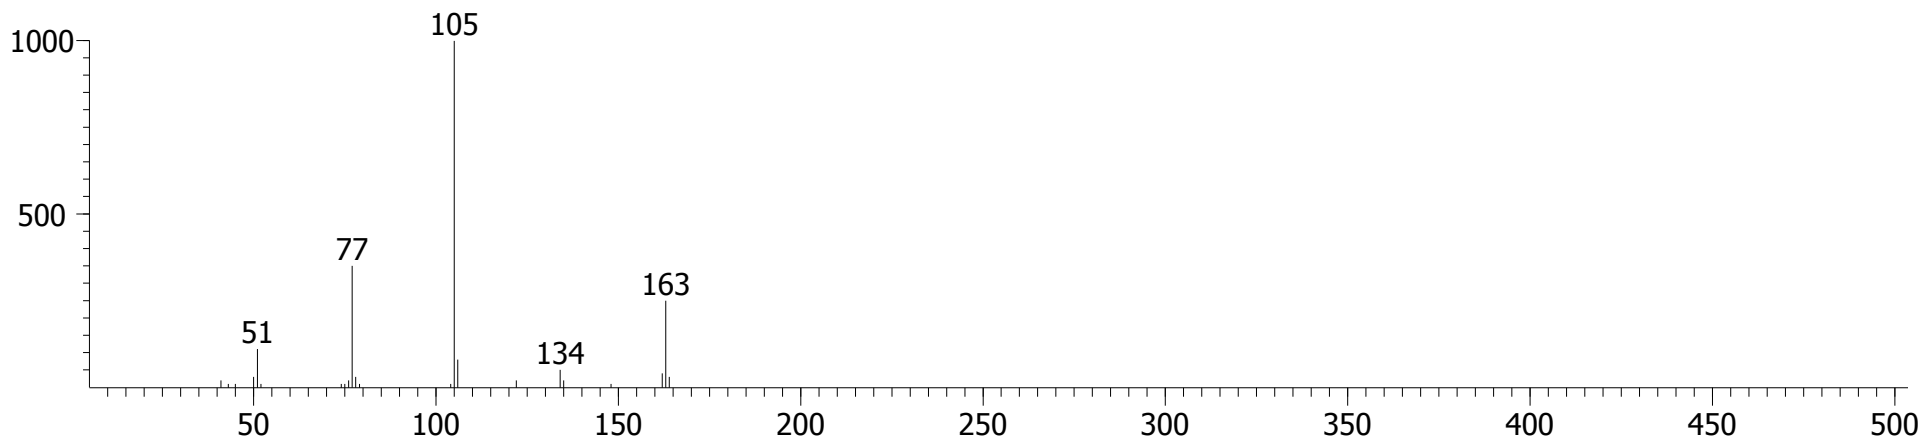

Sample 3, Fraction 1 (Hexane/DCM)

Phthalic acid, di(oct-3-yl) ester

CAS # = 0-00-0  
1st Dimension R.T. = 1558.45  
2nd Dimension R.T. = 1.162  
Quant Mass(es) = 167  
S/N = 4997.2  
Area = 606282  
Height = 78139



Peak True - sample "Lipid BM 3 F1:1", peak 3190, at 1558.45 , 1.162 sec , sec (Spec # 145396)

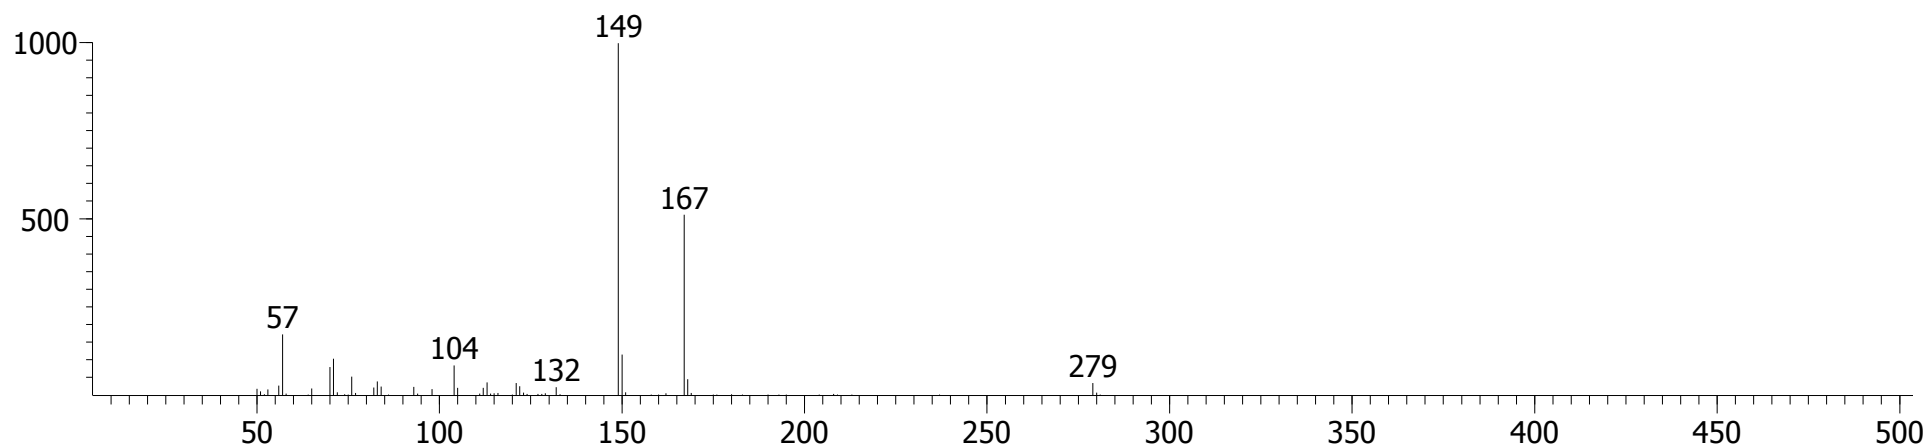

Library Hit - similarity 888, "Phthalic acid, di(oct-3-yl) ester"

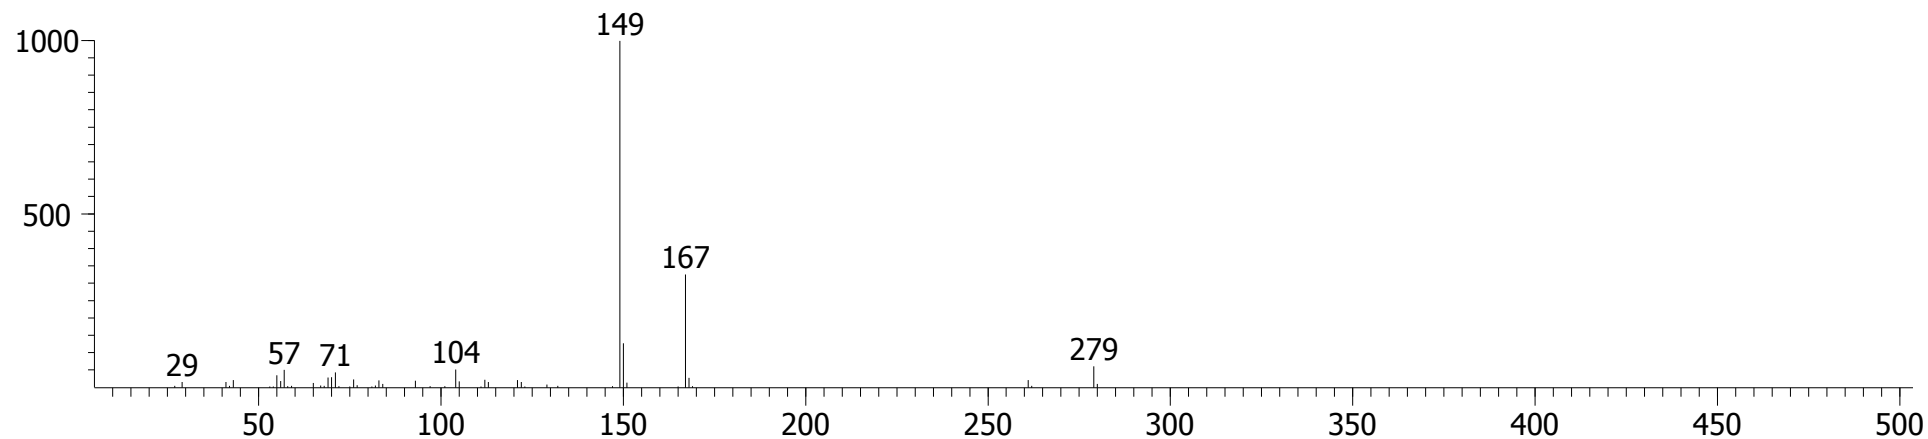

Sample 3, Fraction 1 (Hexane/DCM)

Benzoic acid, hexyl ester

CAS # = 6789-88-4  
1st Dimension R.T. = 1708.87  
2nd Dimension R.T. = 1.234  
Quant Mass(es) = 123  
S/N = 517.76  
Area = 67550  
Height = 8446.9

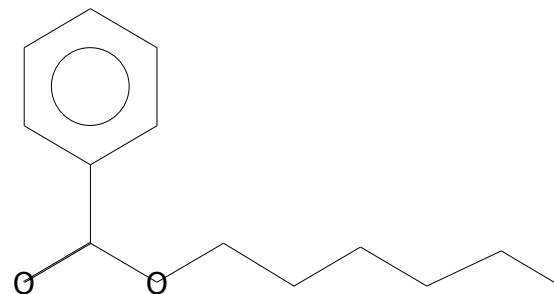

Peak True - sample "Lipid BM 3 F1:1", peak 3630, at 1708.87 , 1.234 sec , sec (Spec # 168197)

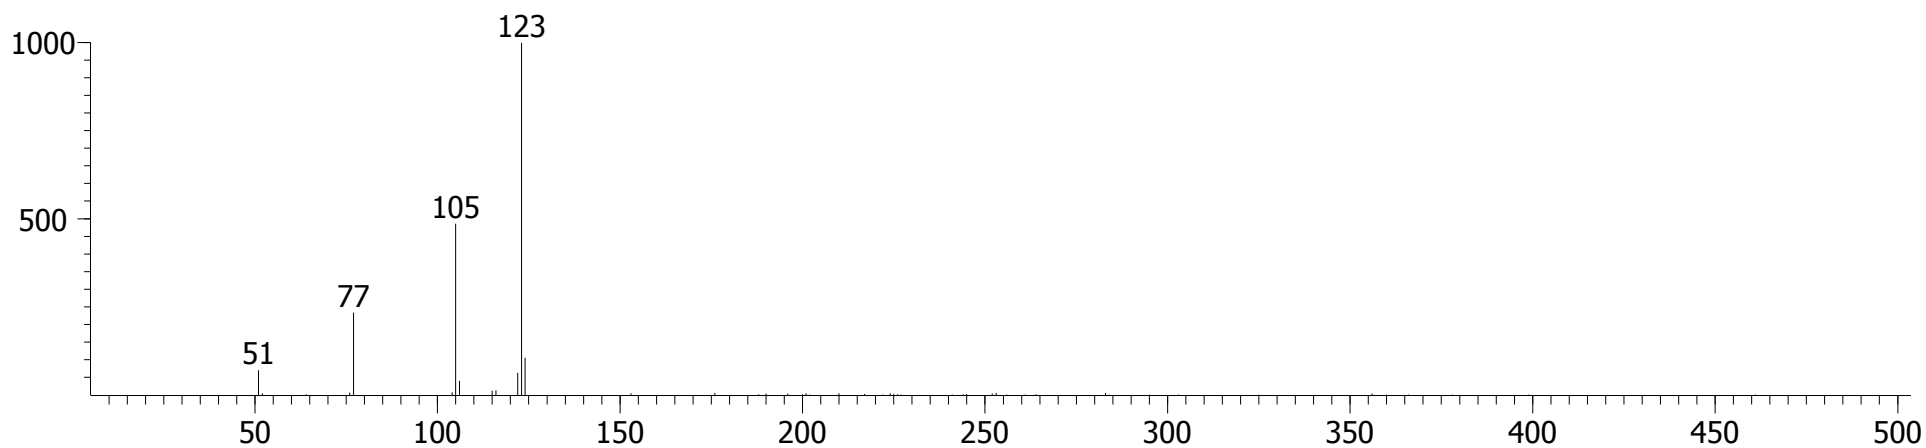

Library Hit - similarity 849, "Benzoic acid, hexyl ester"

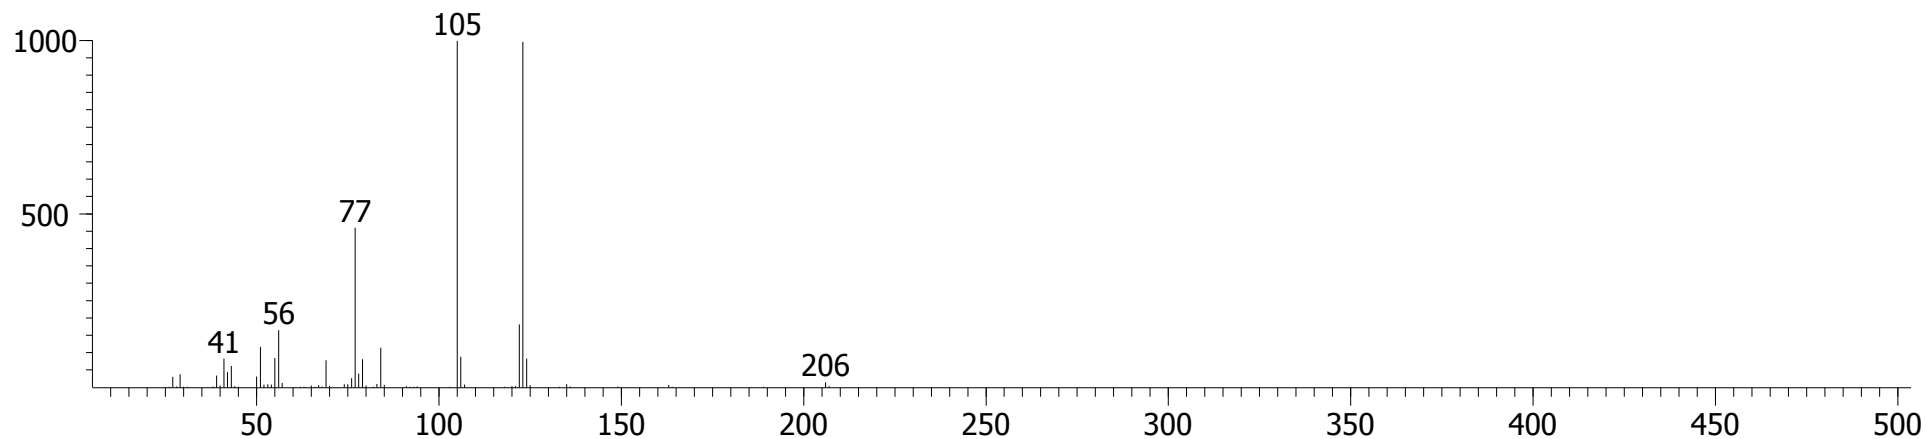

Sample 3, Fraction 2 (DCM)

1H-Indene, 2,3-dihydro-4,7-dimethyl-

CAS # = 6682-71-9  
1st Dimension R.T. = 806.382  
2nd Dimension R.T. = 0.917  
Quant Mass(es) = 146  
S/N = 193.56  
Area = 6315.2  
Height = 1066.8

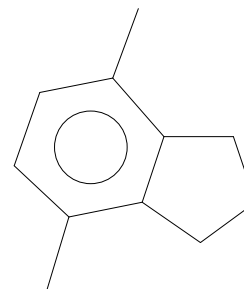

Peak True - sample "Lipid BM 3 F2:1", peak 384, at 806.382 , 0.917 sec , sec (Spec # 31409)

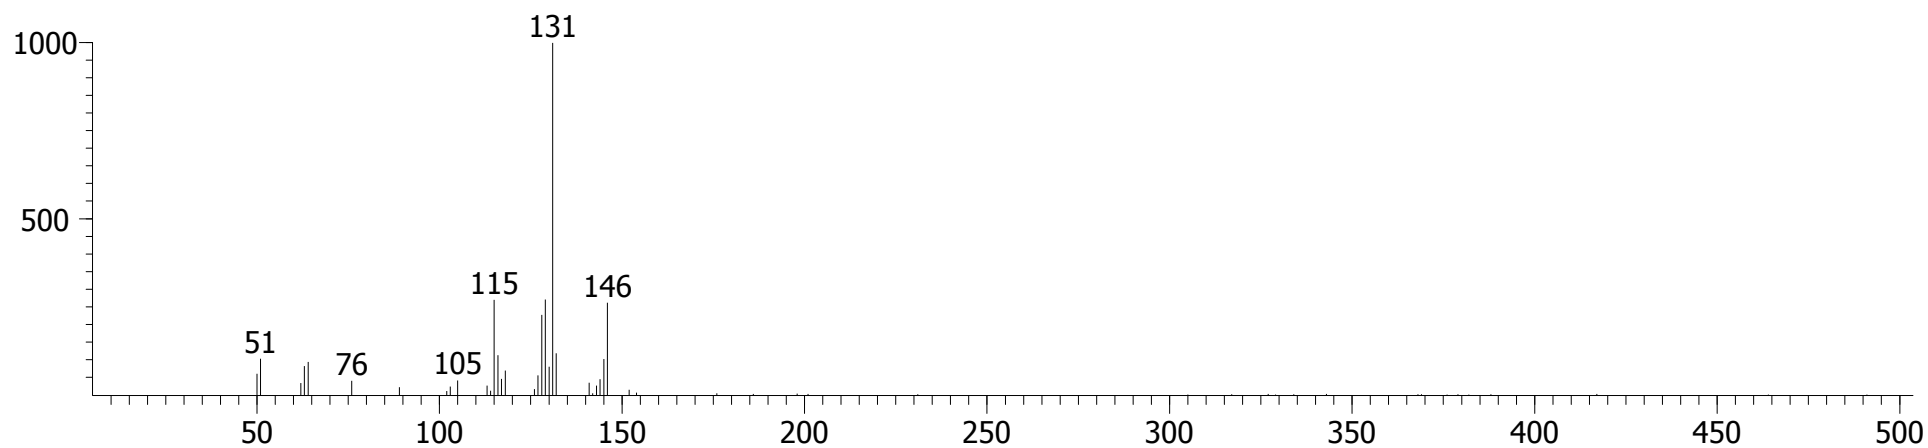

Library Hit - similarity 872, "1H-Indene, 2,3-dihydro-4,7-dimethyl-"

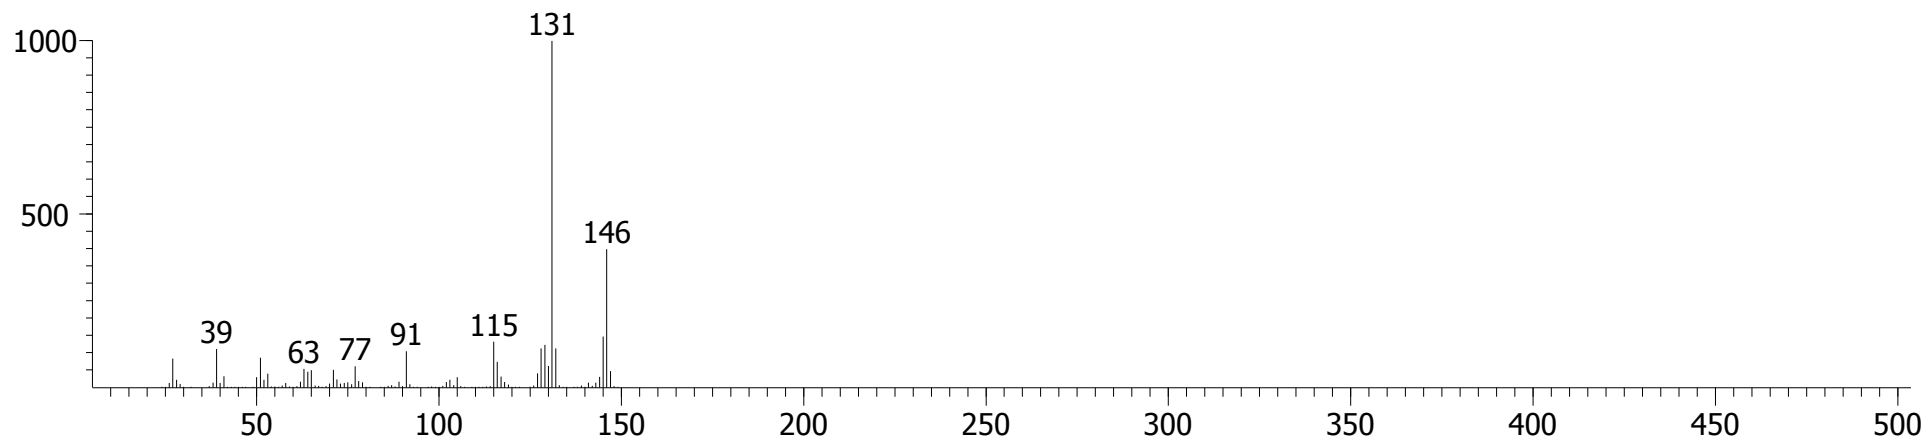

Sample 3, Fraction 2 (DCM)

Naphthalene,

1,2,3,4-tetrahydro-5-methyl-

CAS # = 2809-64-5

1st Dimension R.T. = 809.88

2nd Dimension R.T. = 0.924

Quant Mass(es) = 146

S/N = 168.47

Area = 9670.5

Height = 1701.5

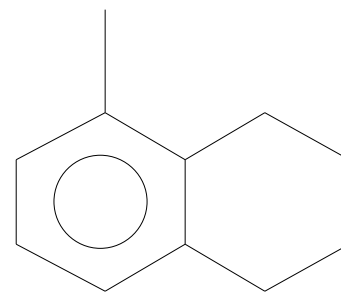

(5-Methyltetralin)

Peak True - sample "Lipid BM 3 F2:1", peak 390, at 809.88 , 0.924 sec , sec (Spec # 31940)

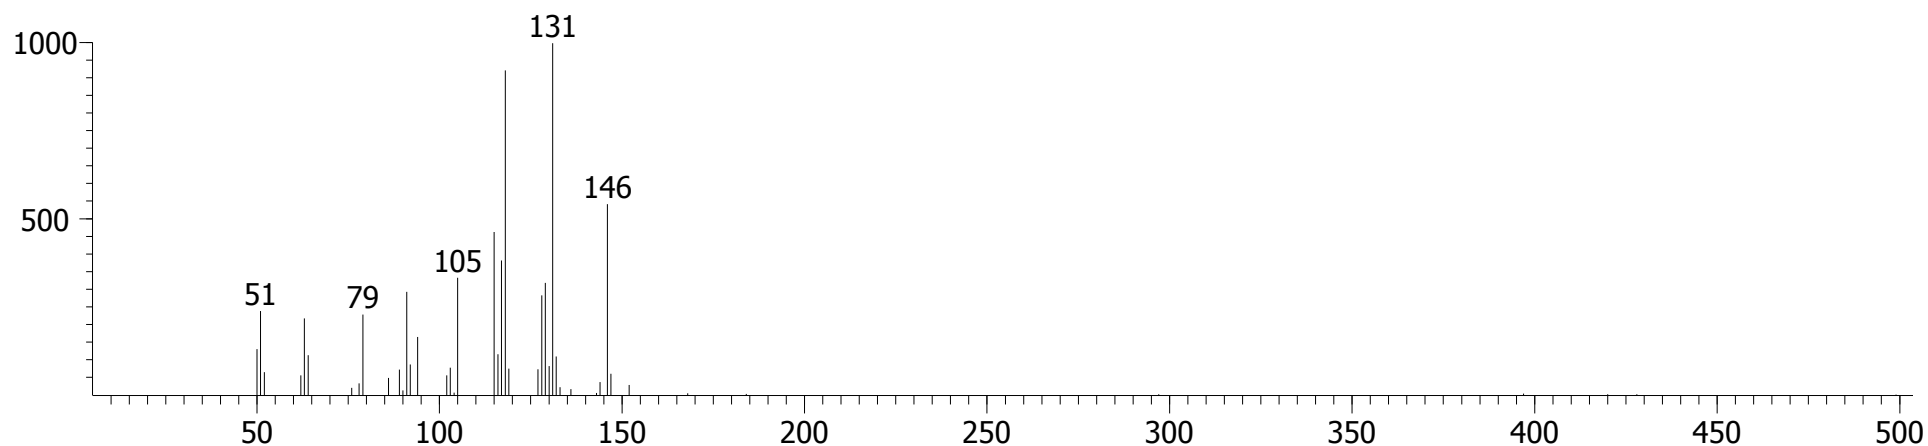

Library Hit - similarity 840, "Naphthalene, 1,2,3,4-tetrahydro-5-methyl-"





Sample 3, Fraction 2 (DCM)

Benzene, 1-chloro-4-(methylthio)-

CAS # = 123-09-1  
1st Dimension R.T. = 809.88  
2nd Dimension R.T. = 0.970  
Quant Mass(es) = 158  
S/N = 908.39  
Area = 63581  
Height = 13115



(4-Chlorothioanisole)

Peak True - sample "Lipid BM 3 F2:1", peak 393, at 809.88 , 0.970 sec , sec (Spec # 31947)

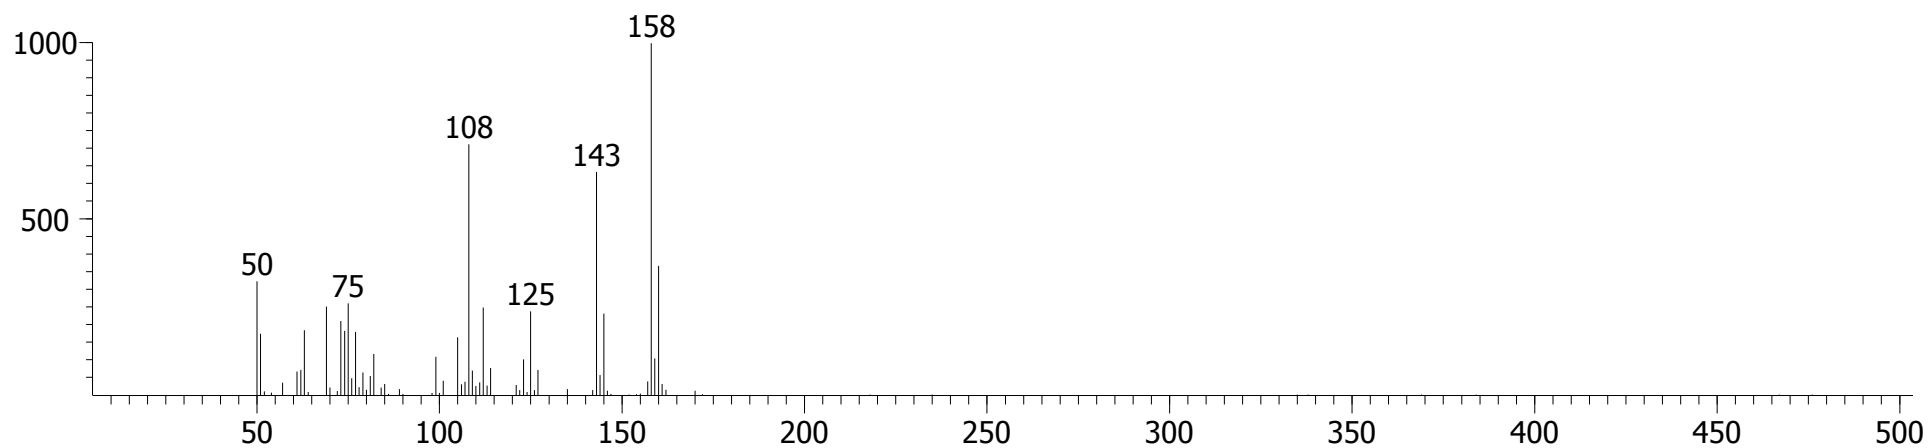

Library Hit - similarity 878, "Benzene, 1-chloro-4-(methylthio)-"



Sample 3, Fraction 2 (DCM)

1H-Inden-1-one, 2,3-dihydro-

CAS # = 83-33-0  
1st Dimension R.T. = 823.872  
2nd Dimension R.T. = 1.030  
Quant Mass(es) = 132  
S/N = 85.936  
Area = 6690.3  
Height = 1332.8



Peak True - sample "Lipid BM 3 F2:1", peak 433, at 823.872 , 1.030 sec , sec (Spec # 34076)

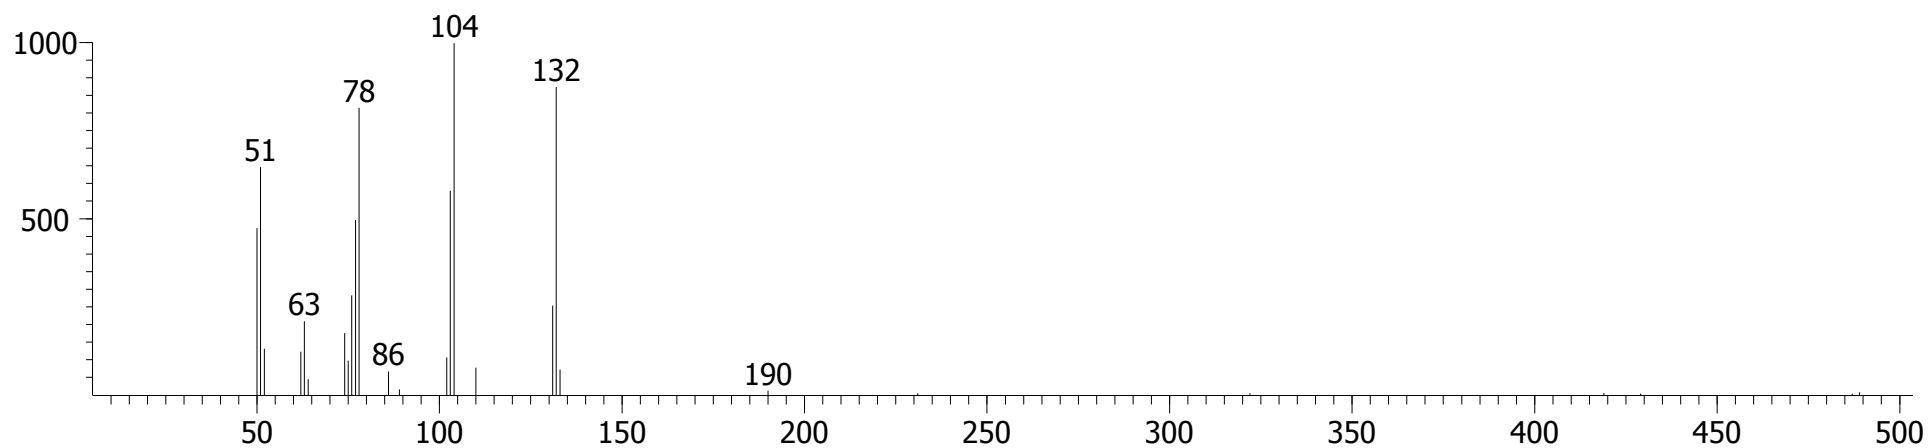

Library Hit - similarity 871, "1H-Inden-1-one, 2,3-dihydro-"



Sample 3, Fraction 2 (DCM)

Benzenamine, 4-chloro-N-methyl-

CAS # = 932-96-7  
1st Dimension R.T. = 830.868  
2nd Dimension R.T. = 0.997  
Quant Mass(es) = 140  
S/N = 8606.2  
Area = 1468351  
Height = 285563



(4-Chloro-N-methylaniline)

Peak True - sample "Lipid BM 3 F2:1", peak 445, at 830.868 , 0.997 sec , sec (Spec # 35131)

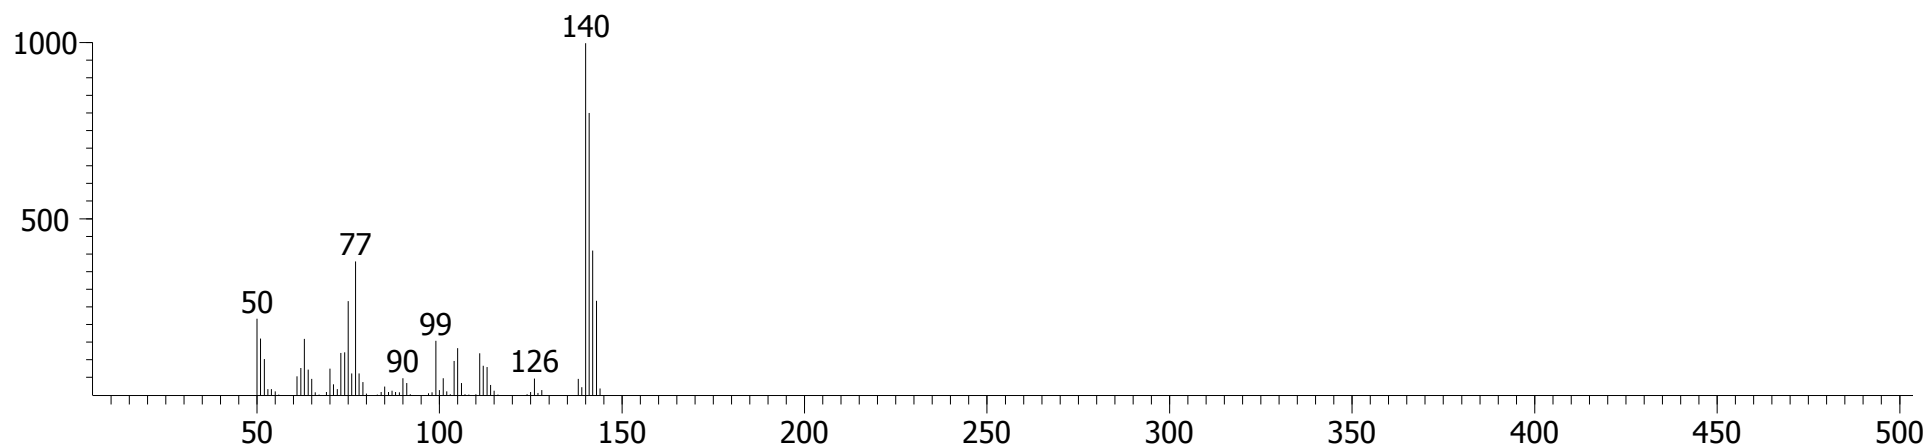

Library Hit - similarity 914, "Benzenamine, 4-chloro-N-methyl-"



Sample 3, Fraction 2 (DCM)

3-Chloro-N,N-dimethylaniline

CAS # = 6848-13-1  
1st Dimension R.T. = 841.362  
2nd Dimension R.T. = 0.964  
Quant Mass(es) = 154  
S/N = 693.15  
Area = 49452  
Height = 10183

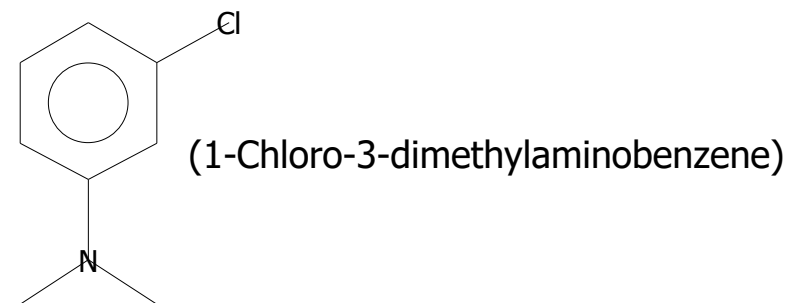

Peak True - sample "Lipid BM 3 F2:1", peak 465, at 841.362 , 0.964 sec , sec (Spec # 36716)

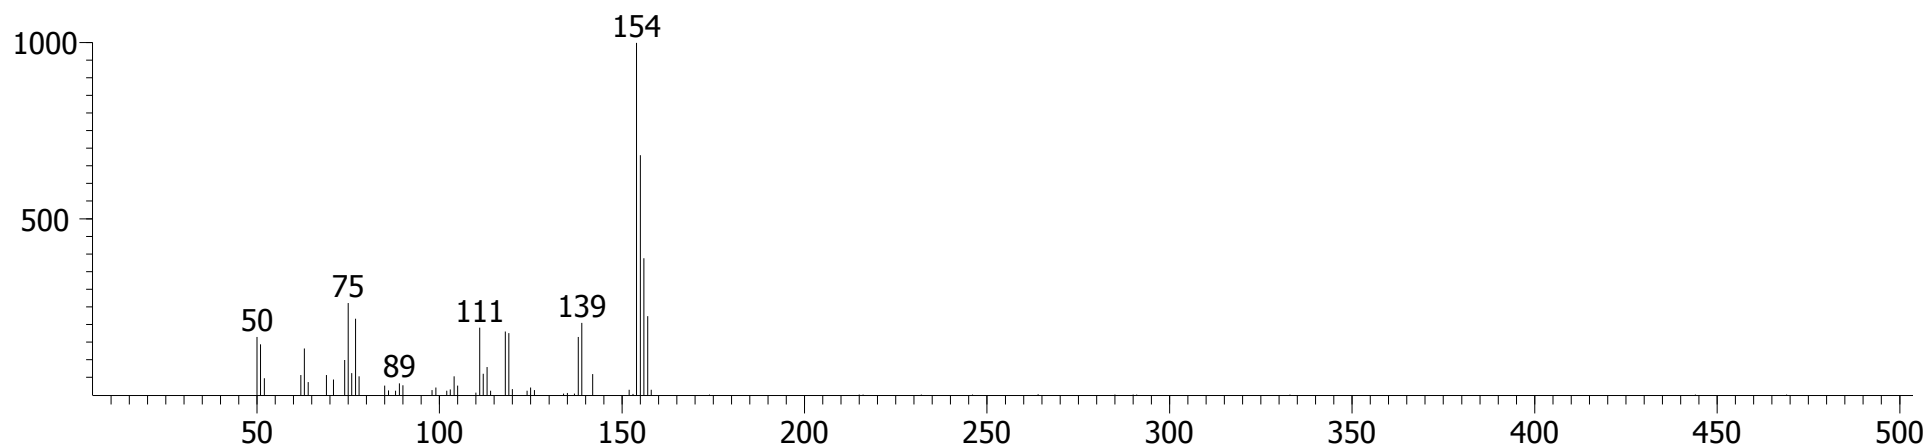

Library Hit - similarity 893, "3-Chloro-N,N-dimethylaniline"

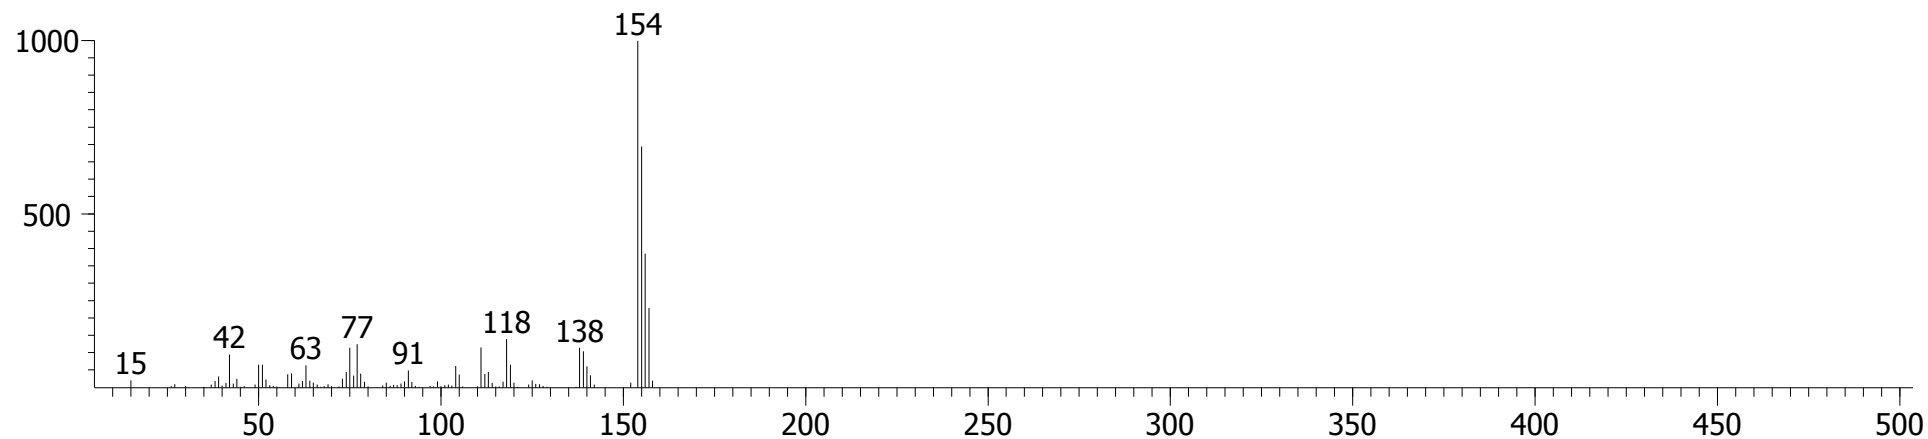

# Sample 3, Fraction 2 (DCM)

## Naphthalene, 1-methyl-

CAS # = 90-12-0  
1st Dimension R.T. = 851.856  
2nd Dimension R.T. = 0.983  
Quant Mass(es) = 142  
S/N = 670.94  
Area = 44318  
Height = 7918.8



Peak True - sample "Lipid BM 3 F2:1", peak 487, at 851.856 , 0.983 sec , sec (Spec # 38309)

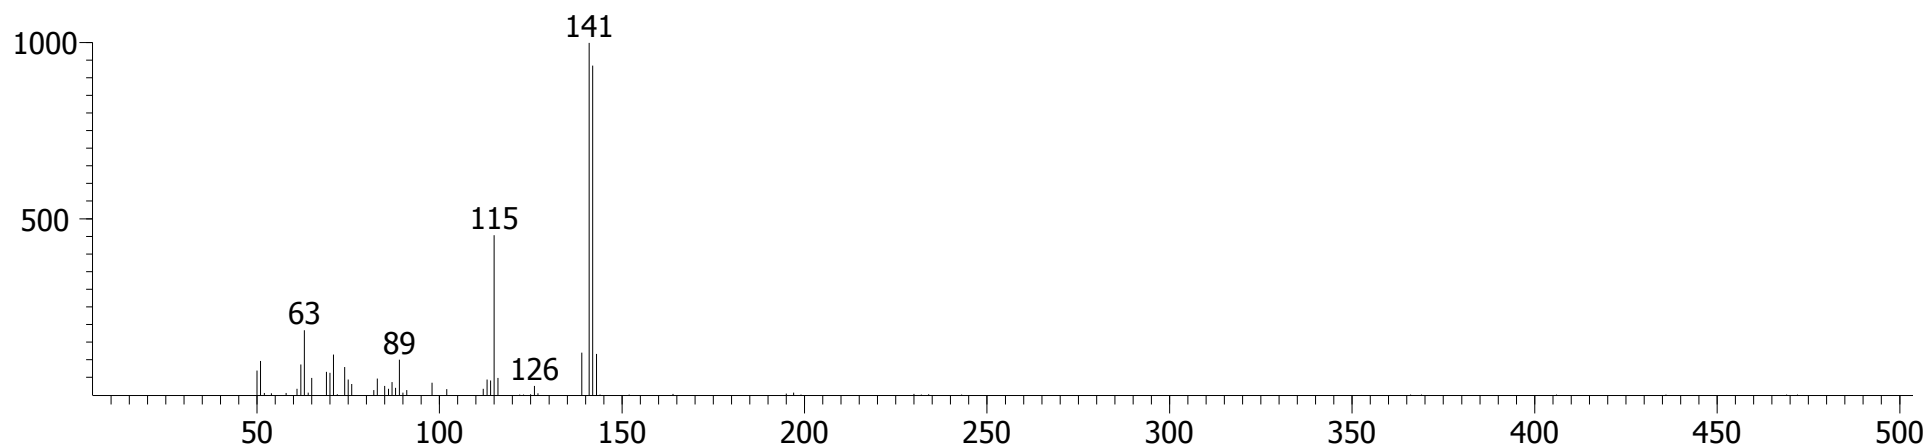

Library Hit - similarity 942, "Naphthalene, 1-methyl-"

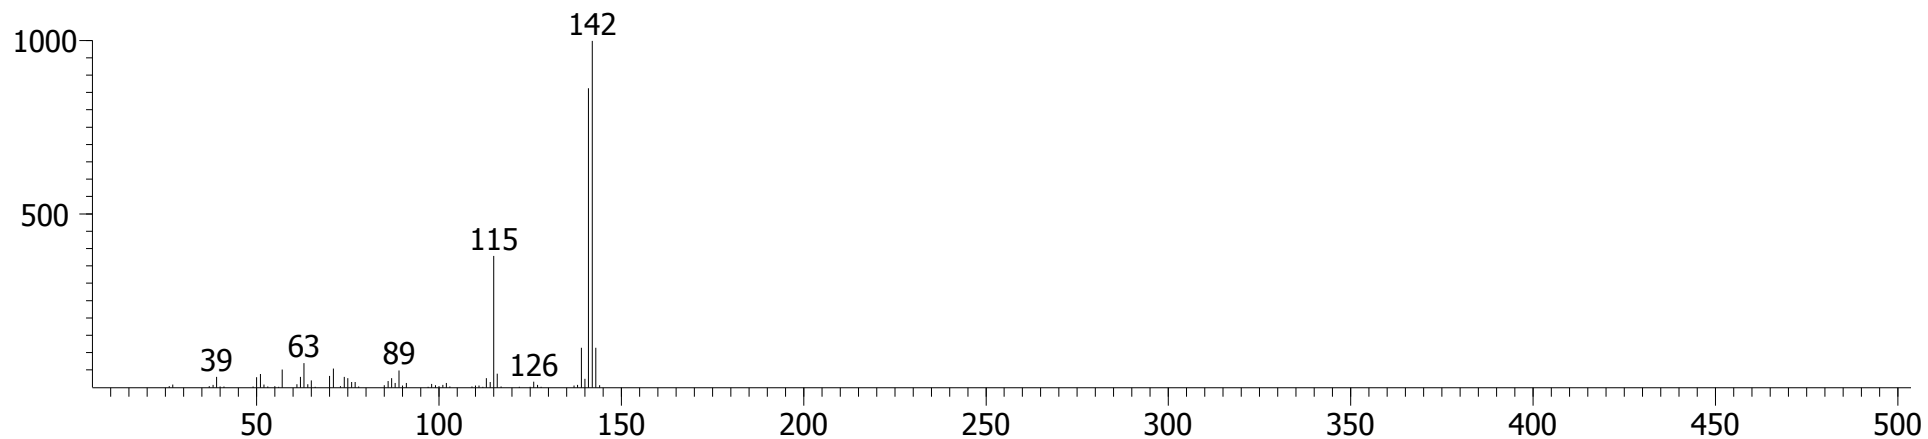

Sample 3, Fraction 2 (DCM)

Benzoic acid, 2-(hydroxymethyl)-

CAS # = 612-20-4  
1st Dimension R.T. = 879.84  
2nd Dimension R.T. = 1.096  
Quant Mass(es) = 134  
S/N = 167.03  
Area = 11022  
Height = 1760.9

(2-Hydroxymethylbenzoic acid)



Peak True - sample "Lipid BM 3 F2:1", peak 542, at 879.84 , 1.096 sec , sec (Spec # 42566)

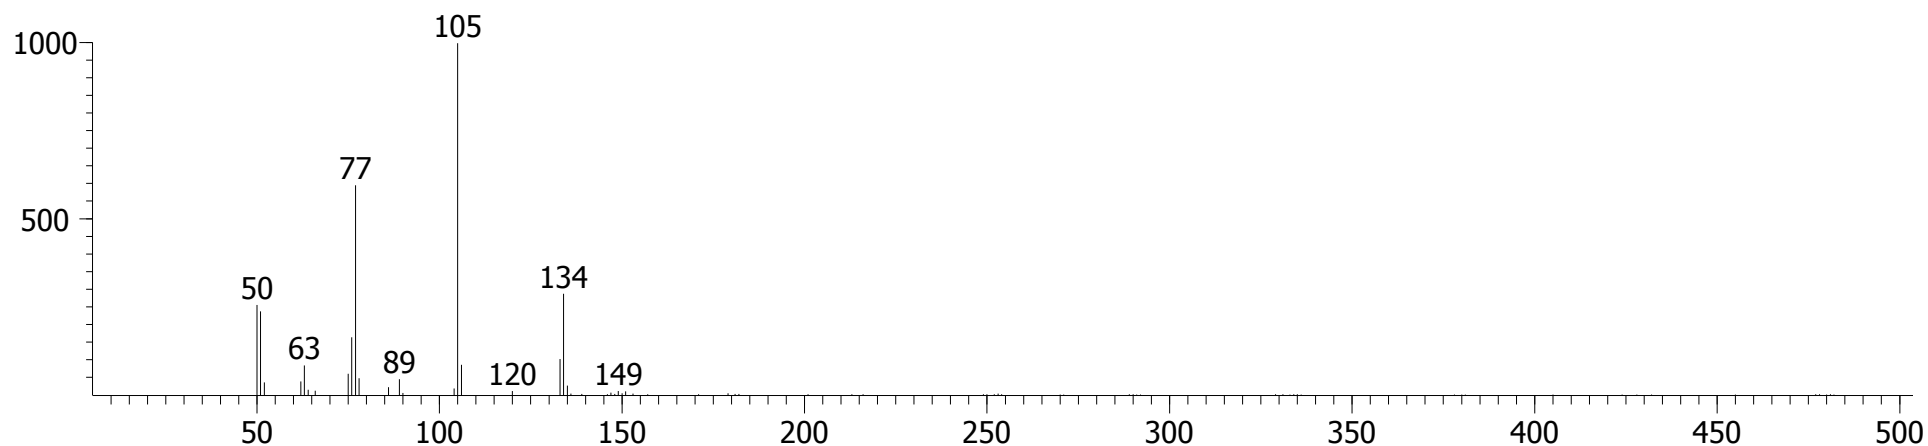

Library Hit - similarity 937, "Benzoic acid, 2-(hydroxymethyl)-"



# Sample 3, Fraction 2 (DCM)

## Biphenyl

CAS # = 92-52-4  
1st Dimension R.T. = 900.828  
2nd Dimension R.T. = 0.983  
Quant Mass(es) = 154  
S/N = 382.38  
Area = 48000  
Height = 4473.9

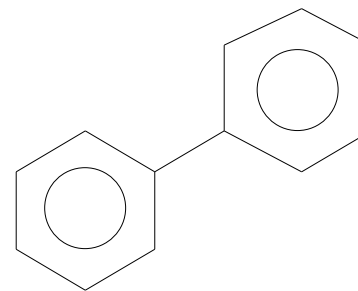

Peak True - sample "Lipid BM 3 F2:1", peak 596, at 900.828 , 0.983 sec , sec (Spec # 45729)

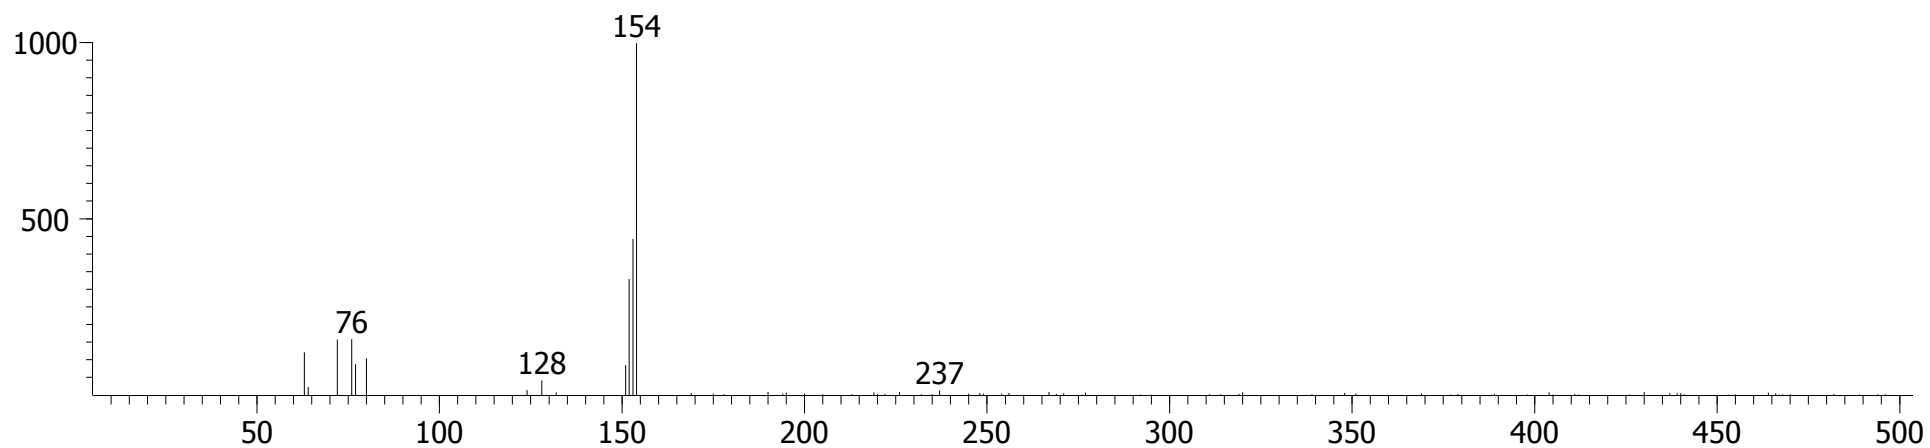

Library Hit - similarity 858, "Biphenyl"



# Sample 3, Fraction 2 (DCM)

## Vanillin

CAS # = 121-33-5  
1st Dimension R.T. = 914.82  
2nd Dimension R.T. = 1.056  
Quant Mass(es) = 151  
S/N = 390.05  
Area = 66859  
Height = 6972.4



Peak True - sample "Lipid BM 3 F2:1", peak 644, at 914.82 , 1.056 sec , sec (Spec # 47860)

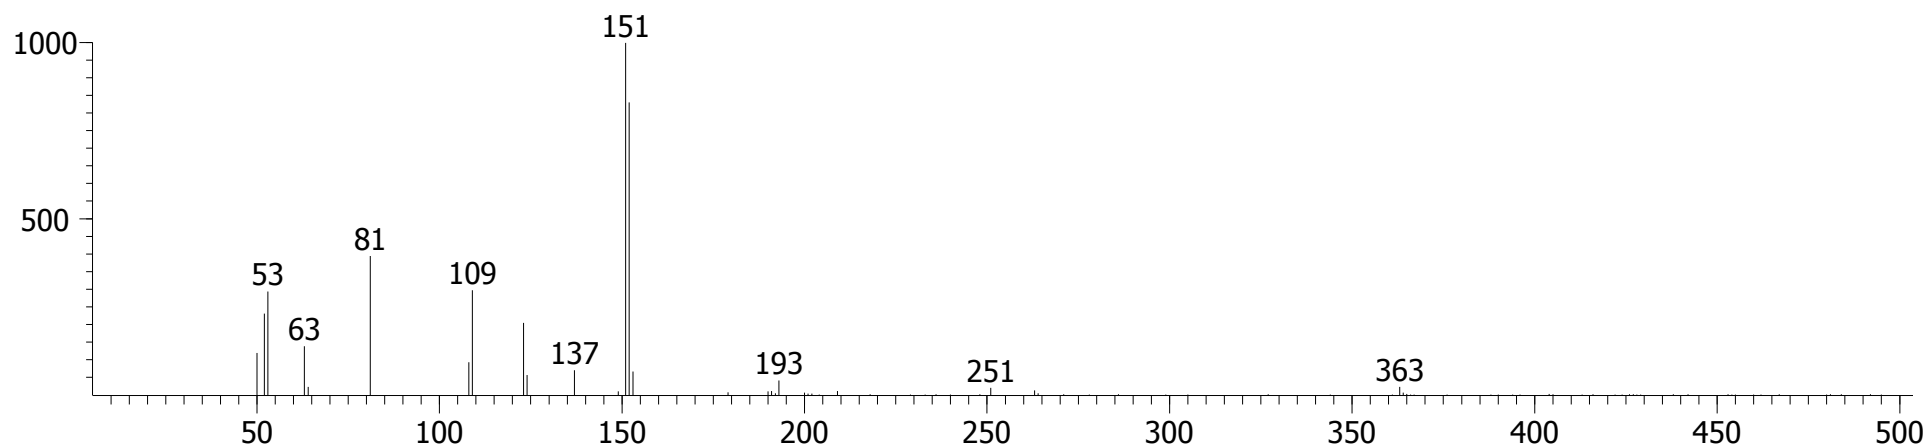

Library Hit - similarity 903, "Vanillin"

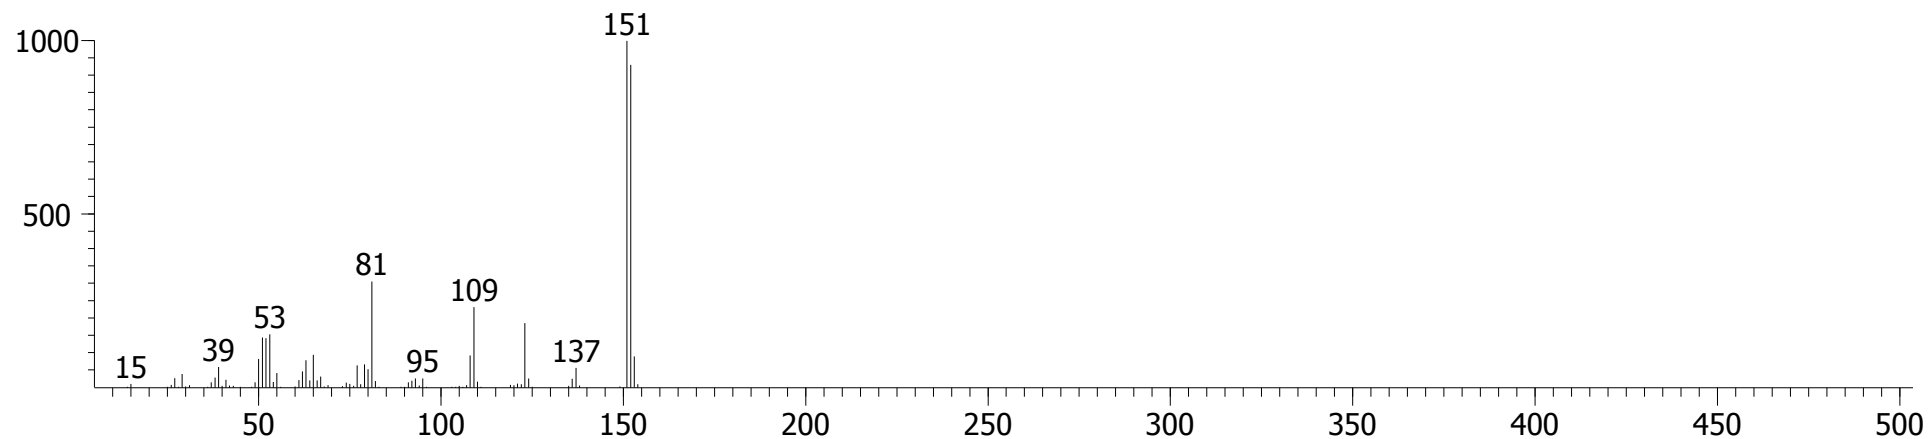



Sample 3, Fraction 2 (DCM)

Naphthalene, 1,7-dimethyl-

CAS # = 575-37-1  
1st Dimension R.T. = 925.314  
2nd Dimension R.T. = 0.970  
Quant Mass(es) = 156  
S/N = 326.03  
Area = 36842  
Height = 6708.2

1,7-Dimethylnaphthalene



Peak True - sample "Lipid BM 3 F2:1", peak 663, at 925.314 , 0.970 sec , sec (Spec # 49437)

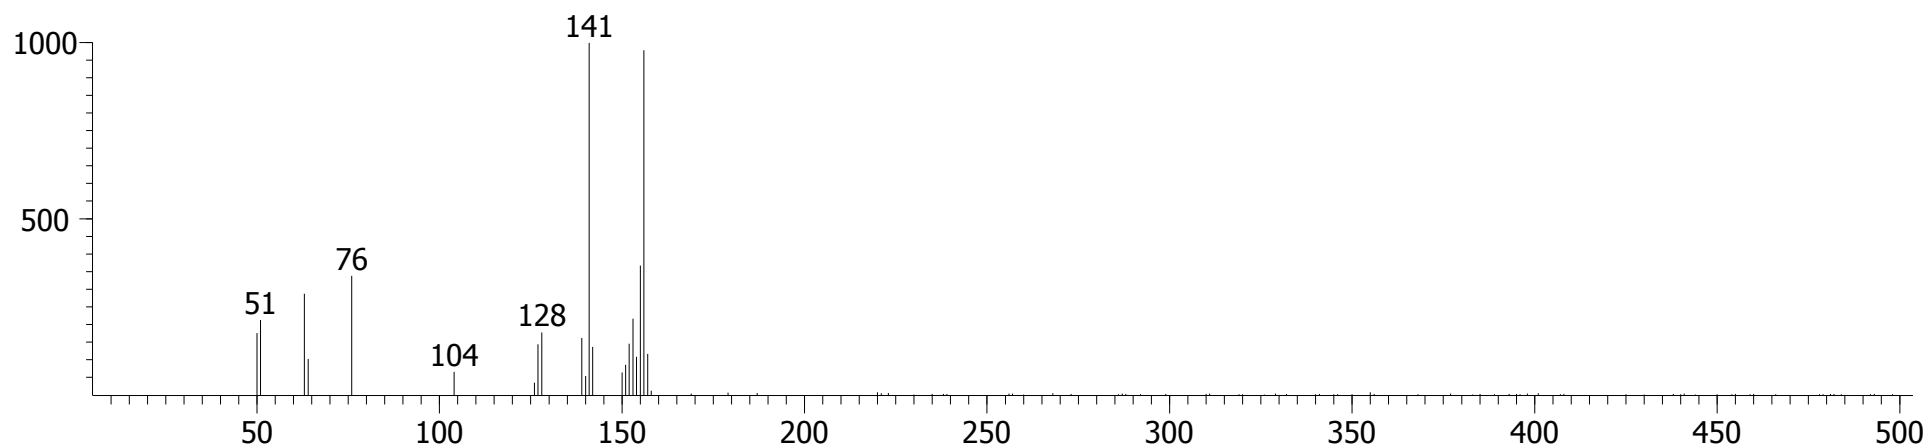

Library Hit - similarity 854, "Naphthalene, 1,7-dimethyl-"



Sample 3, Fraction 2 (DCM)

Ethanone, 1,1'-(1,3-phenylene)bis-

(1,3-Diacetylbenzene)

CAS # = 6781-42-6  
1st Dimension R.T. = 939.306  
2nd Dimension R.T. = 1.036  
Quant Mass(es) = 162  
S/N = 2585.9  
Area = 105594  
Height = 17470



Peak True - sample "Lipid BM 3 F2:1", peak 699, at 939.306 , 1.036 sec , sec (Spec # 51567)

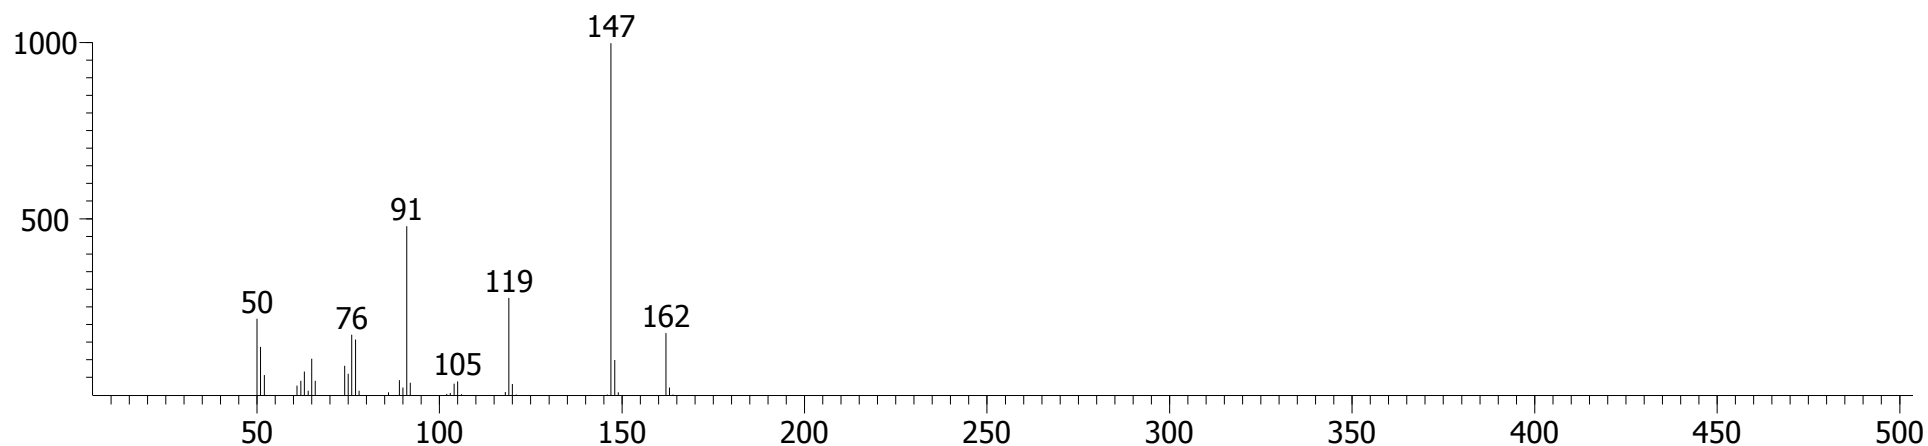

Library Hit - similarity 947, "Ethanone, 1,1'-(1,3-phenylene)bis-"



# Sample 3, Fraction 2 (DCM)

## Dimethyl phthalate

CAS # = 131-11-3  
1st Dimension R.T. = 949.8  
2nd Dimension R.T. = 1.036  
Quant Mass(es) = 163  
S/N = 246.24  
Area = 39392  
Height = 6700.7



Peak True - sample "Lipid BM 3 F2:1", peak 721, at 949.8 , 1.036 sec , sec (Spec # 53157)

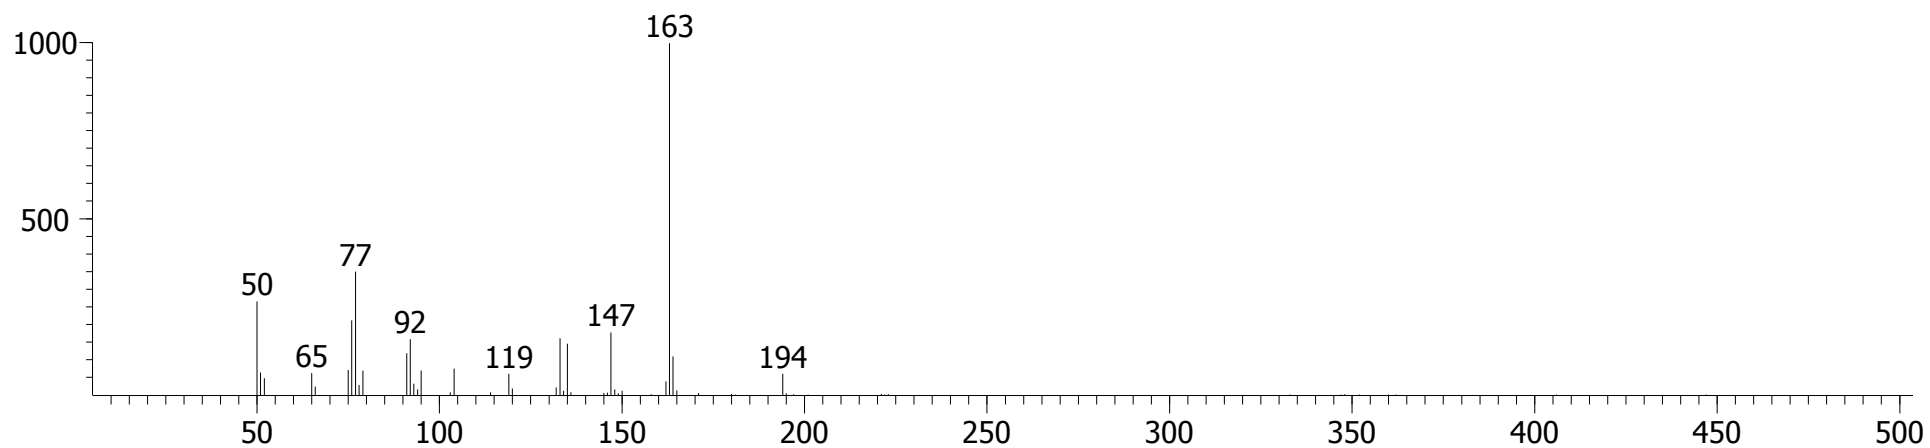

Library Hit - similarity 812, "Dimethyl phthalate"

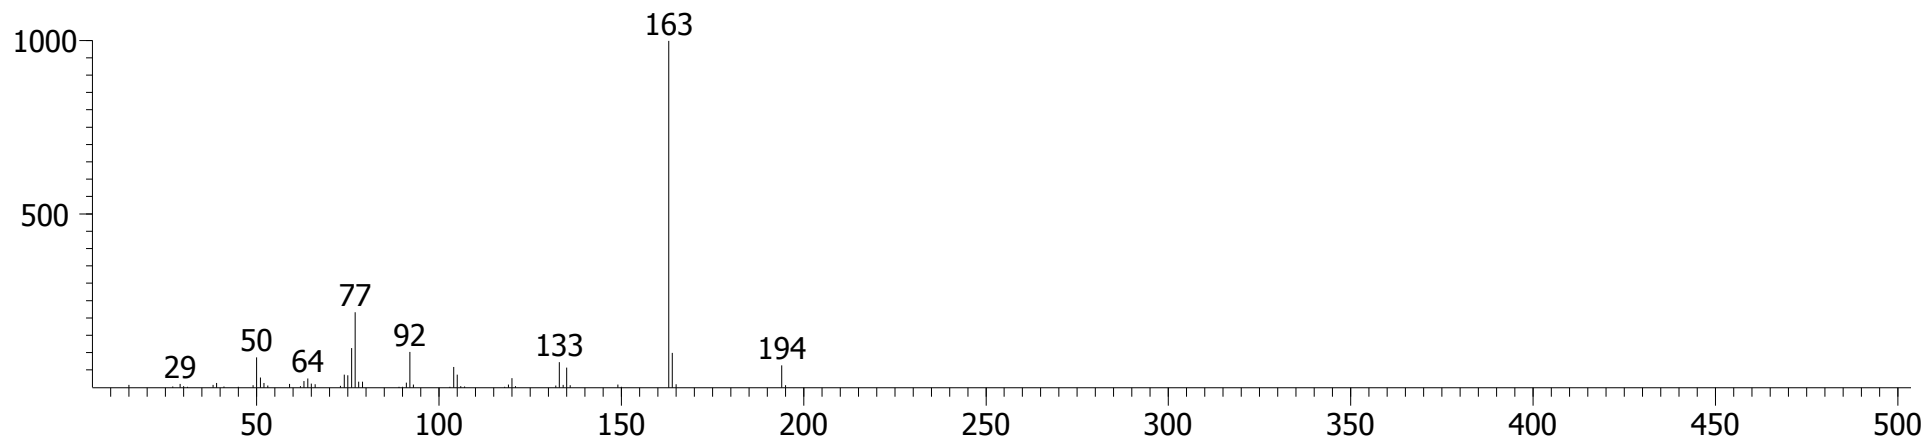

Sample 3, Fraction 2 (DCM)

ϵ-Chlorobutyrophenone

CAS # = 939-52-6  
1st Dimension R.T. = 953.298  
2nd Dimension R.T. = 0.944  
Quant Mass(es) = 120  
S/N = 150.40  
Area = 16468  
Height = 2727.5

(4-Chlorobutyrophenone)

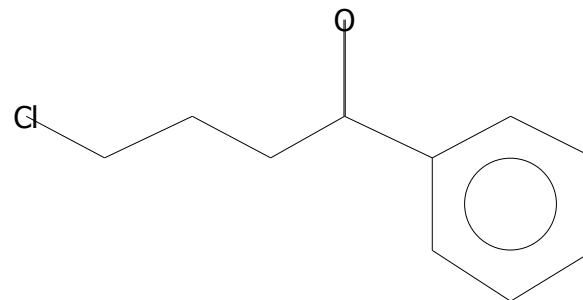

Peak True - sample "Lipid BM 3 F2:1", peak 726, at 953.298 , 0.944 sec , sec (Spec # 53673)

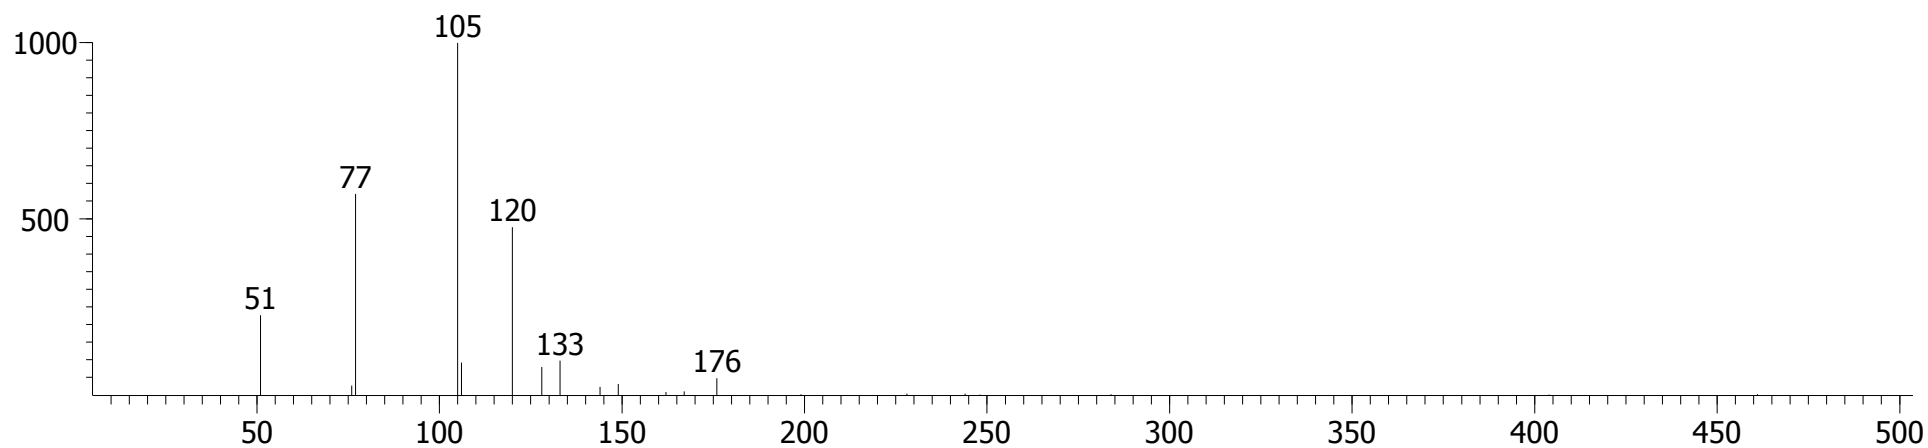

Library Hit - similarity 892, "ϵ-Chlorobutyrophenone"

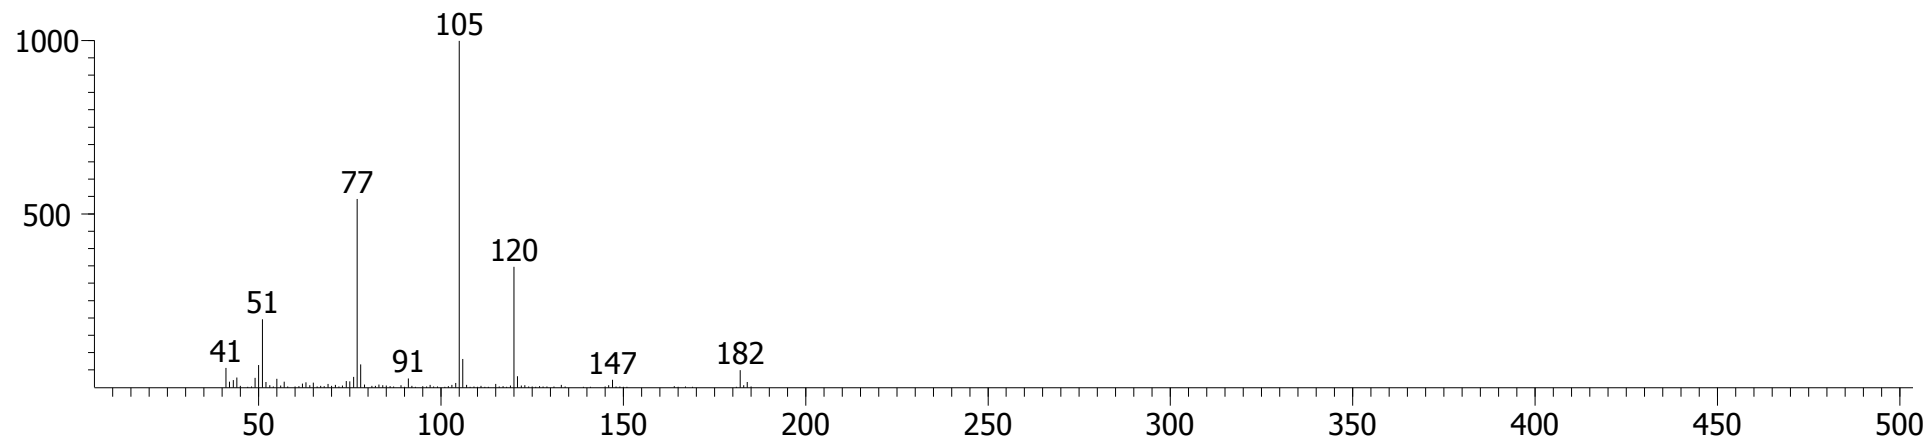

Sample 3, Fraction 2 (DCM)

1-Propanone, 1-(2,4-dimethylphenyl)-

CAS # = 35031-55-1  
1st Dimension R.T. = 960.294  
2nd Dimension R.T. = 1.049  
Quant Mass(es) = 162  
S/N = 107.02  
Area = 12621  
Height = 1692.3

(2,4-Dimethylpropiophenone)



Peak True - sample "Lipid BM 3 F2:1", peak 747, at 960.294 , 1.049 sec , sec (Spec # 54749)

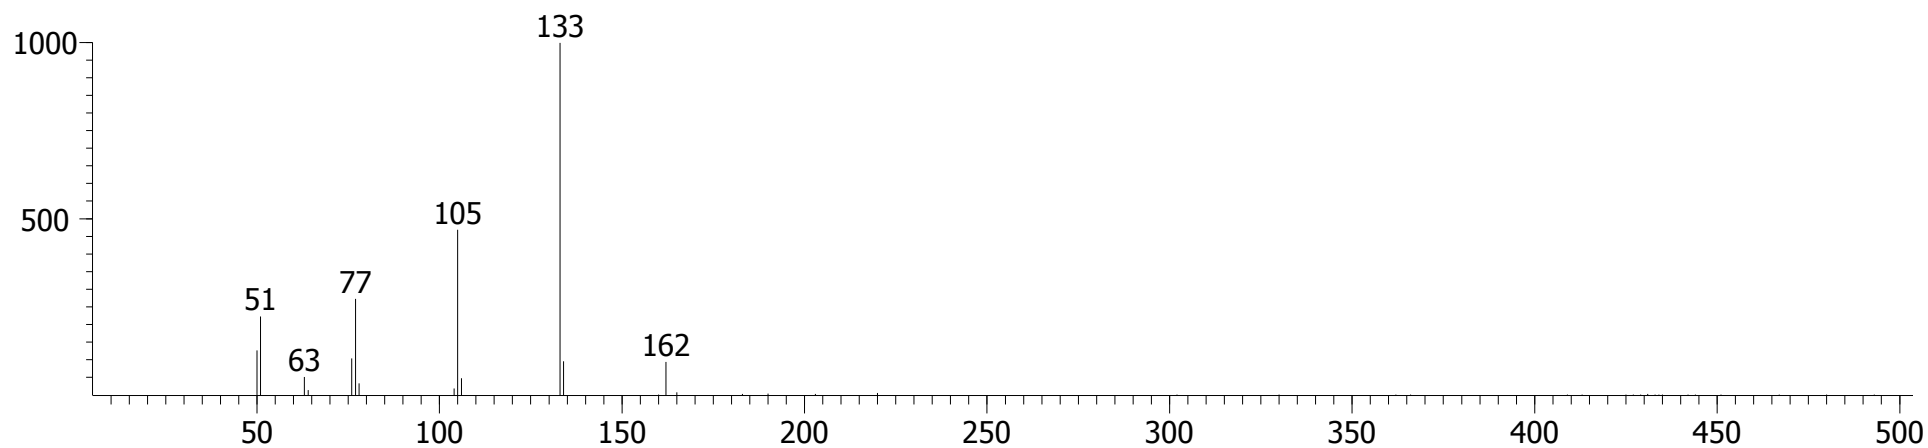

Library Hit - similarity 818, "1-Propanone, 1-(2,4-dimethylphenyl)-"

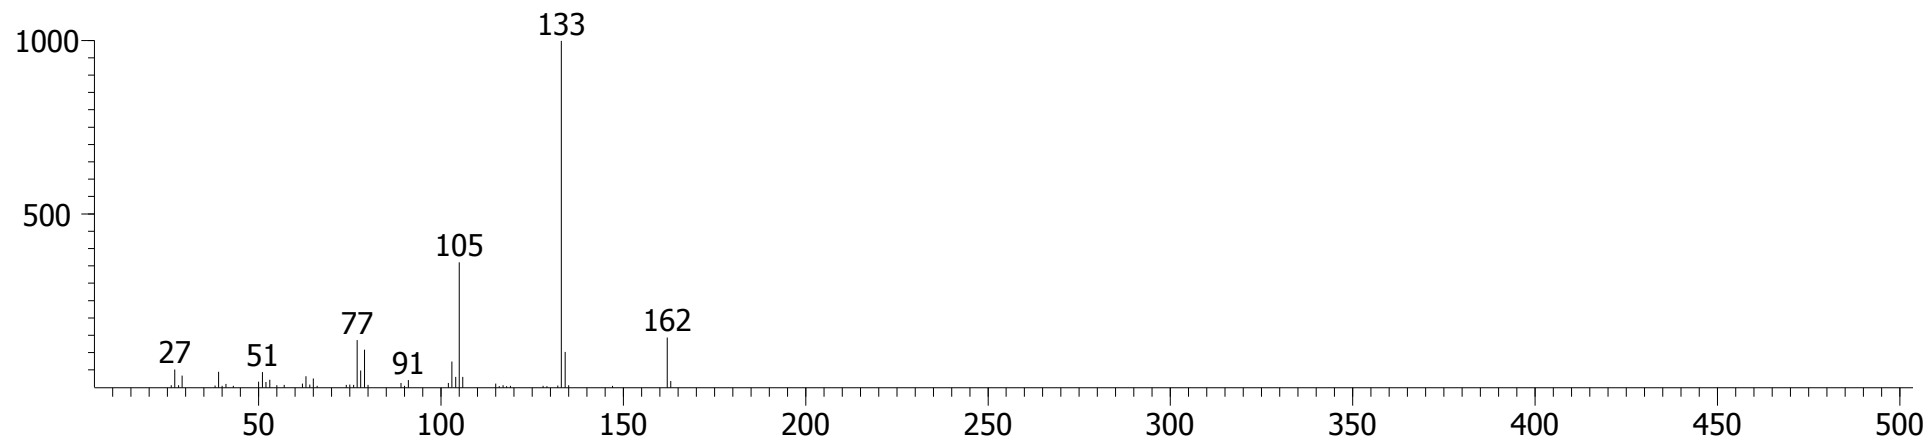

Sample 3, Fraction 2 (DCM)

1H-Pyrrole, 1-(4-chlorophenyl)-

CAS # = 5044-38-2  
1st Dimension R.T. = 967.29  
2nd Dimension R.T. = 1.003  
Quant Mass(es) = 177  
S/N = 62.872  
Area = 9495.5  
Height = 1719.5



(1-(4-Chlorophenyl)pyrrole)

Peak True - sample "Lipid BM 3 F2:1", peak 769, at 967.29 , 1.003 sec , sec (Spec # 55802)

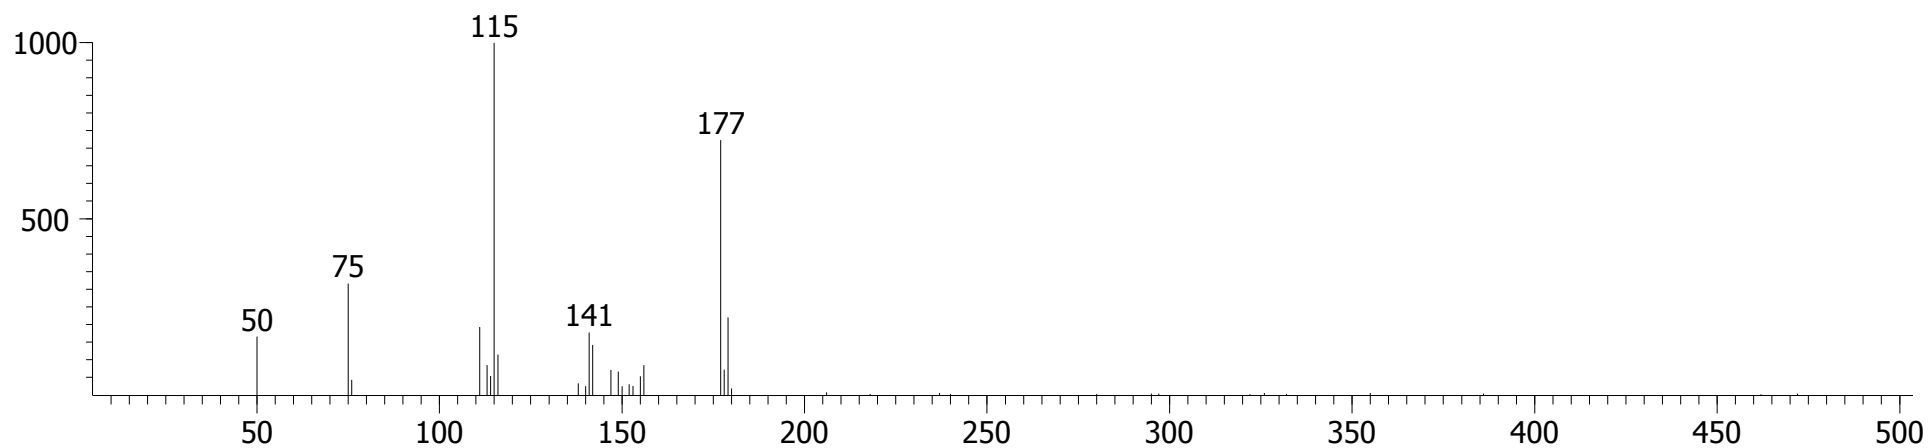

Library Hit - similarity 847, "1H-Pyrrole, 1-(4-chlorophenyl)-"



# Sample 3, Fraction 2 (DCM)

## UNKNOWN # 1

CAS # = 2933-81-5  
1st Dimension R.T. = 974.286  
2nd Dimension R.T. = 1.069  
Quant Mass(es) = 140  
S/N = 1238.7  
Area = 81610  
Height = 15112

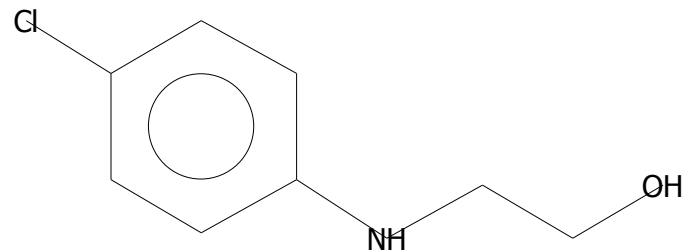

Peak True - sample "Lipid BM 3 F2:1", peak 783, at 974.286 , 1.069 sec , sec (Spec # 56872)

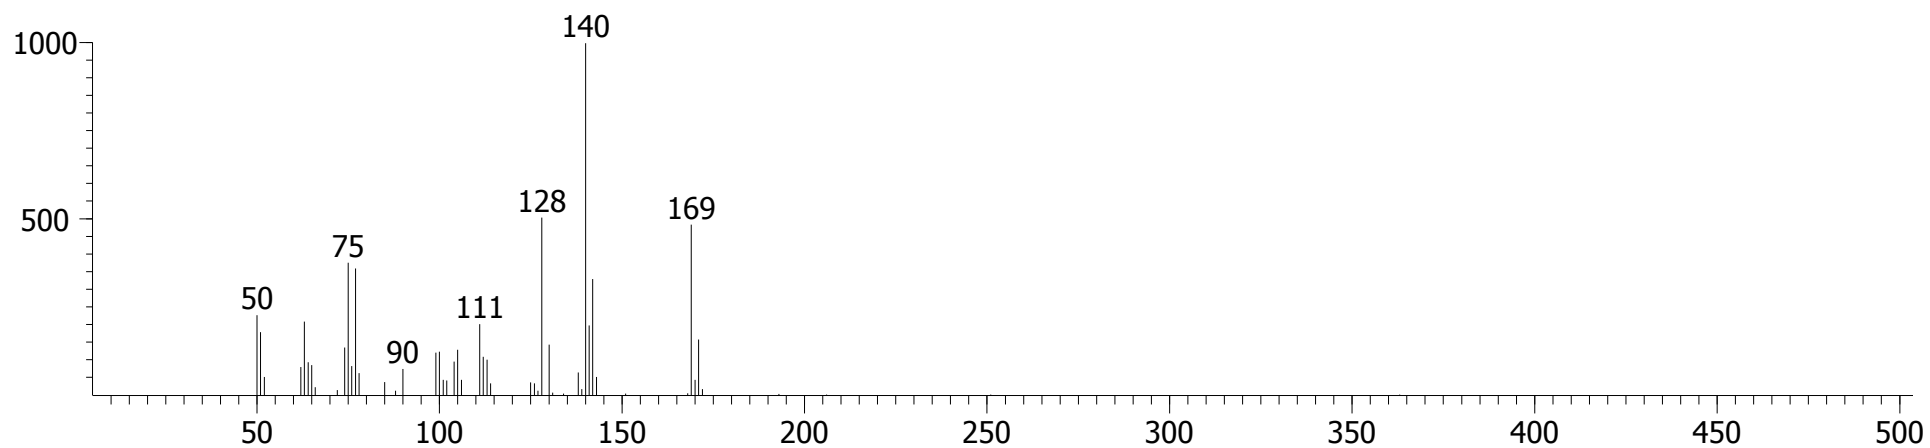

Library Hit - similarity 663, "Ethanol, 2-(4-chlorophenyl)amino-"

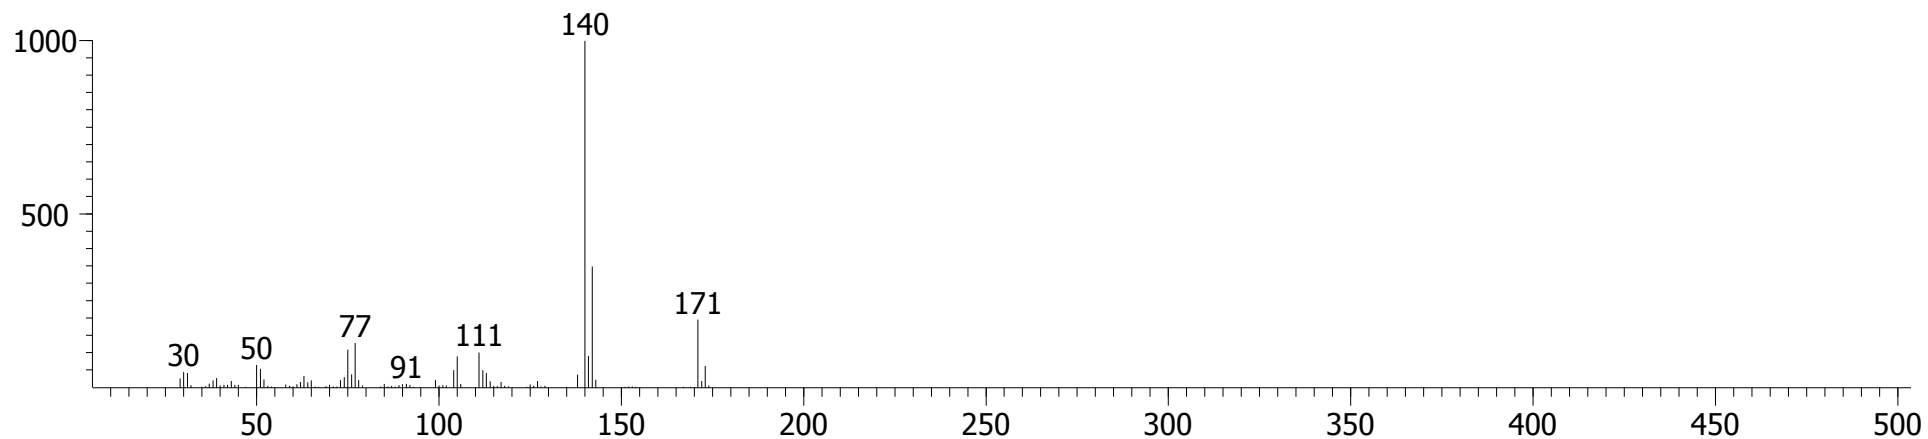

Sample 3, Fraction 2 (DCM)

1,1'-Biphenyl, 4-methyl-

(4-Methylbiphenyl)

CAS # = 644-08-6  
1st Dimension R.T. = 977.784  
2nd Dimension R.T. = 0.990  
Quant Mass(es) = 168  
S/N = 194.82  
Area = 11200  
Height = 1861.8



Peak True - sample "Lipid BM 3 F2:1", peak 790, at 977.784 , 0.990 sec , sec (Spec # 57390)

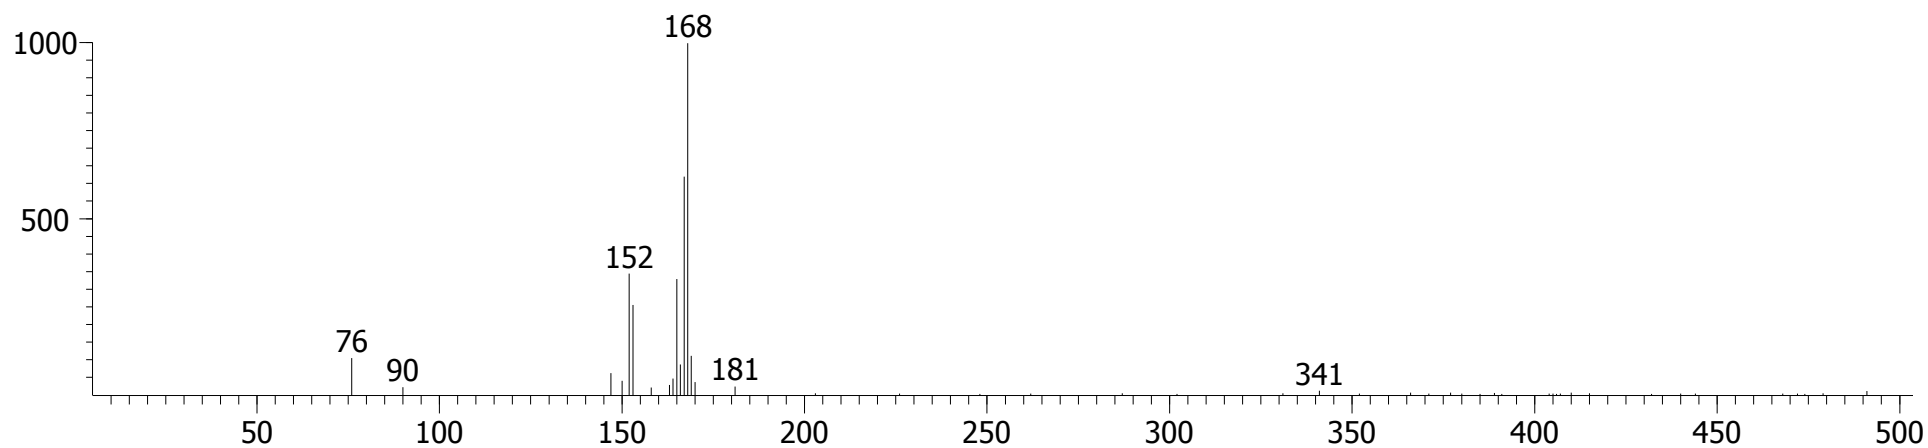

Library Hit - similarity 865, "1,1'-Biphenyl, 4-methyl-"





Sample 3, Fraction 2 (DCM)

UNKNOWN # 3

CAS # = 932-96-7  
1st Dimension R.T. = 981.282  
2nd Dimension R.T. = 1.049  
Quant Mass(es) = 183  
S/N = 829.24  
Area = 13346  
Height = 2876.2



(4-Chloro-N-methylaniline)

Peak True - sample "Lipid BM 3 F2:1", peak 803, at 981.282 , 1.049 sec , sec (Spec # 57929)

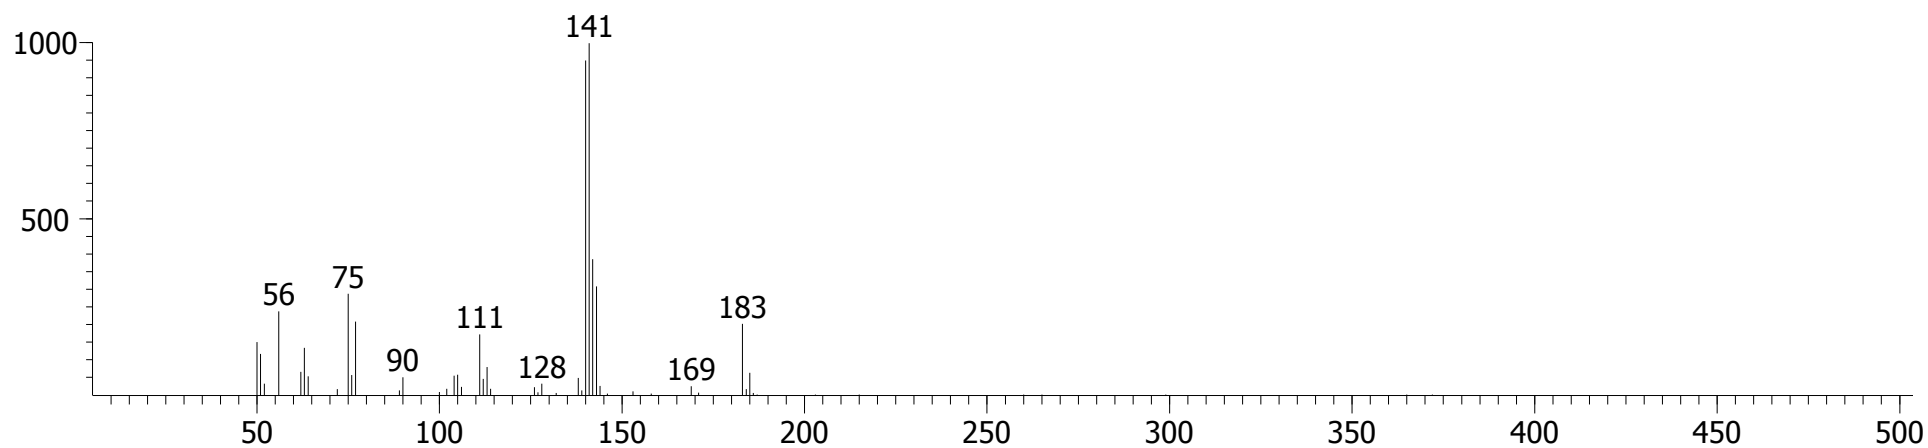

Library Hit - similarity 821, "Benzenamine, 4-chloro-N-methyl-"



# Sample 3, Fraction 2 (DCM)

## Butylated Hydroxytoluene

CAS # = 128-37-0  
1st Dimension R.T. = 988.278  
2nd Dimension R.T. = 0.917  
Quant Mass(es) = 220  
S/N = 4951.4  
Area = 219164  
Height = 41839



Peak True - sample "Lipid BM 3 F2:1", peak 815, at 988.278 , 0.917 sec , sec (Spec # 58969)

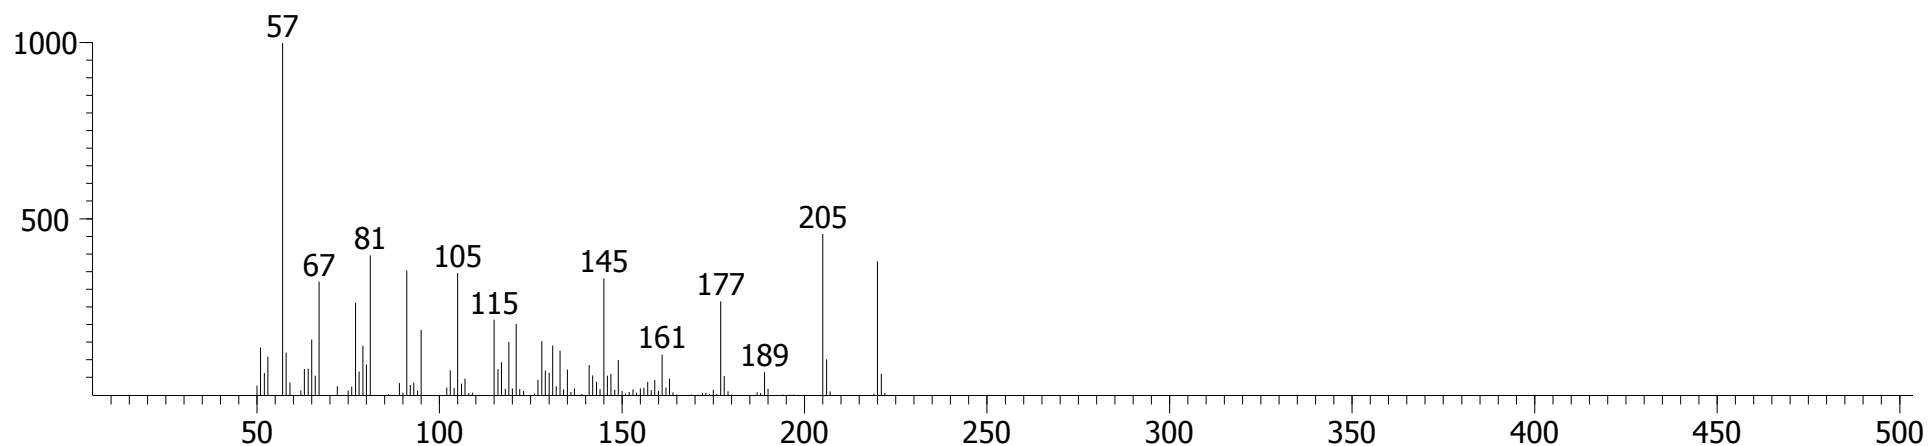

Library Hit - similarity 836, "Butylated Hydroxytoluene"



Sample 3, Fraction 2 (DCM)

Benzoic acid, 4-ethoxy-, ethyl ester

CAS # = 23676-09-7  
1st Dimension R.T. = 998.772  
2nd Dimension R.T. = 0.970  
Quant Mass(es) = 194  
S/N = 10213  
Area = 343201  
Height = 59818

(Ethyl 4-ethoxybenzoate)



Peak True - sample "Lipid BM 3 F2:1", peak 838, at 998.772 , 0.970 sec , sec (Spec # 60567)

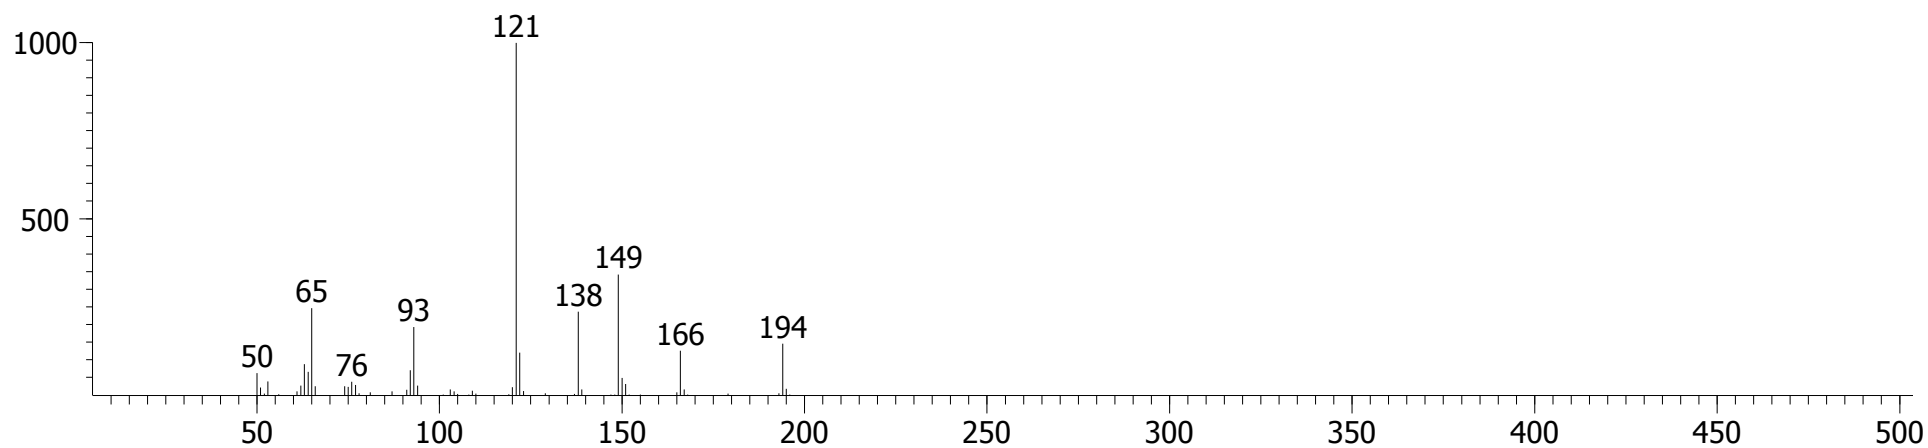

Library Hit - similarity 932, "Benzoic acid, 4-ethoxy-, ethyl ester"



Sample 3, Fraction 2 (DCM)

Benzene, 1-chloro-4-(methylsulfinyl)-

CAS # = 934-73-6  
1st Dimension R.T. = 1002.27  
2nd Dimension R.T. = 1.109  
Quant Mass(es) = 174  
S/N = 310.73  
Area = 10251  
Height = 2147.8



(p-Chlorophenyl methyl sulfoxide)

Peak True - sample "Lipid BM 3 F2:1", peak 852, at 1002.27 , 1.109 sec , sec (Spec # 61118)

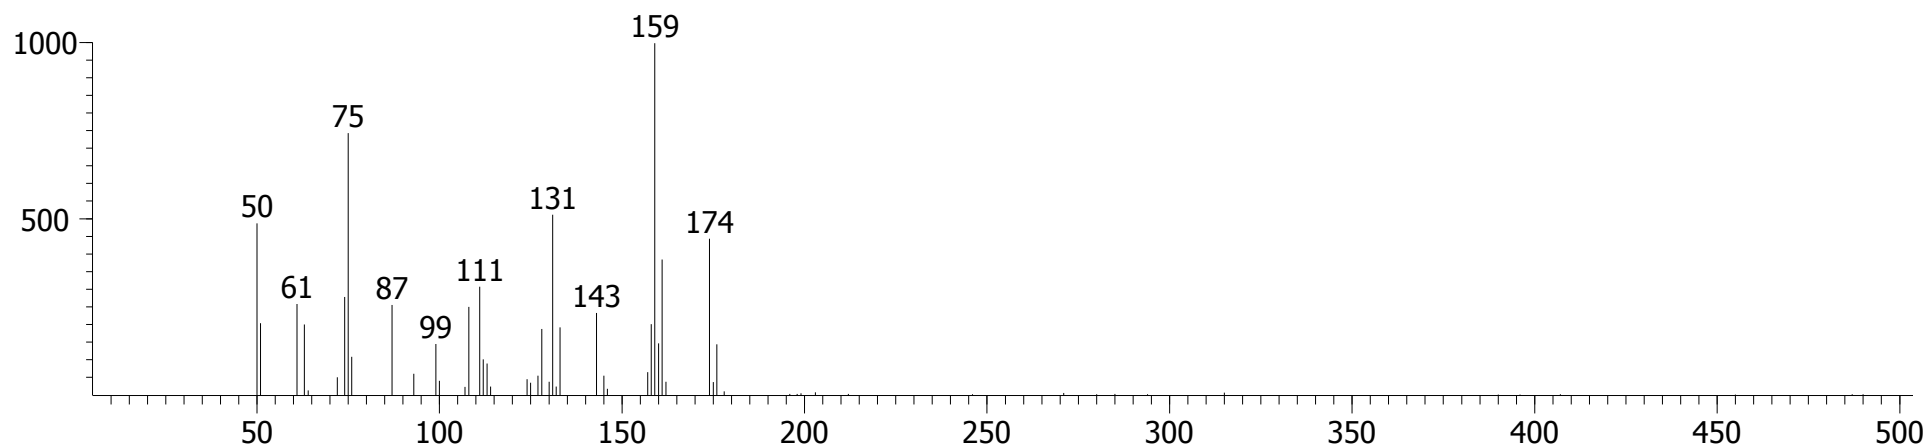

Library Hit - similarity 818, "Benzene, 1-chloro-4-(methylsulfinyl)-"



# Sample 3, Fraction 2 (DCM)

## o-Hydroxybiphenyl

CAS # = 90-43-7  
1st Dimension R.T. = 1005.77  
2nd Dimension R.T. = 1.043  
Quant Mass(es) = 169  
S/N = 200.30  
Area = 10589  
Height = 1929.4



Peak True - sample "Lipid BM 3 F2:1", peak 861, at 1005.77 , 1.043 sec , sec (Spec # 61638)

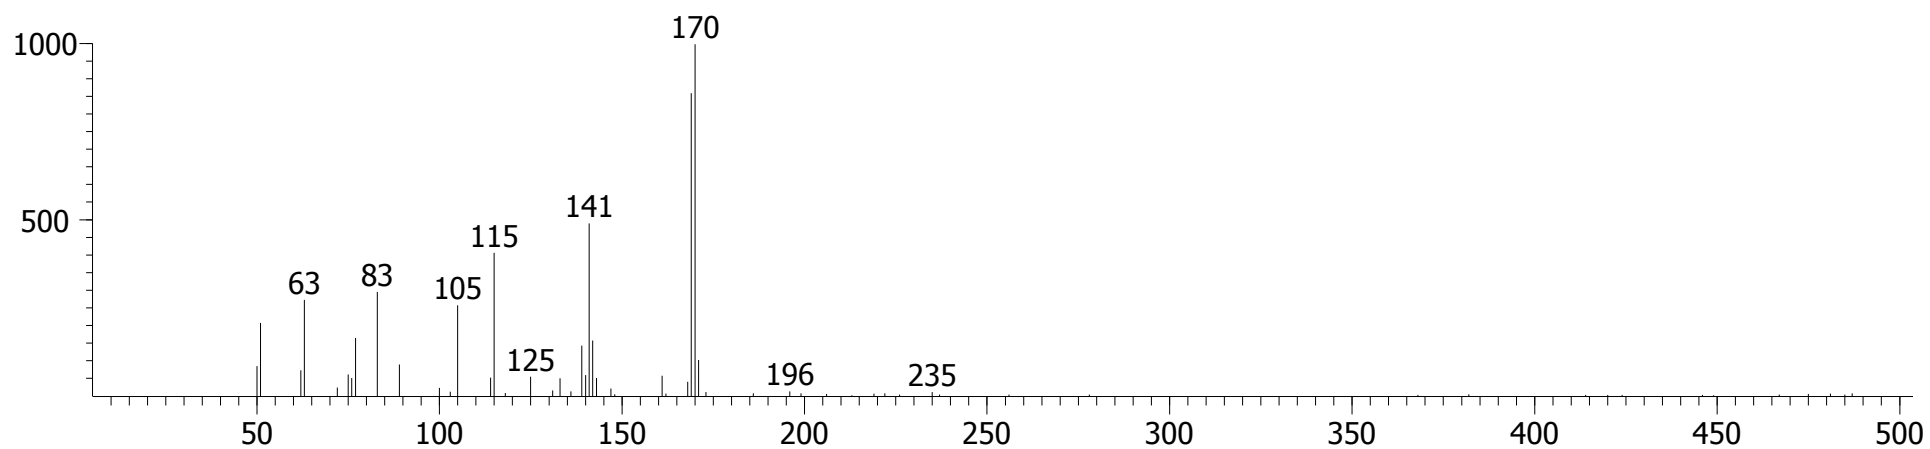

Library Hit - similarity 829, "o-Hydroxybiphenyl"

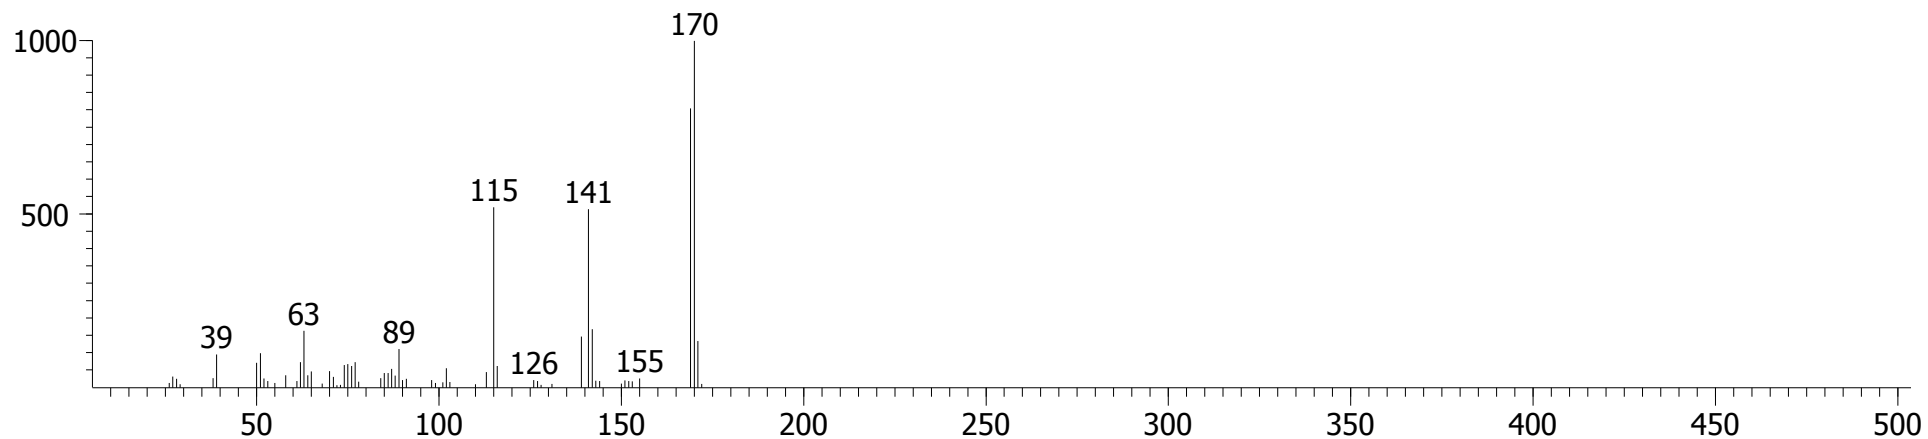

Sample 3, Fraction 2 (DCM)

2(3H)-Furanone, dihydro-5-phenyl-

CAS # = 1008-76-0  
1st Dimension R.T. = 1009.27  
2nd Dimension R.T. = 1.115  
Quant Mass(es) = 162  
S/N = 55.737  
Area = 3999.2  
Height = 698.29

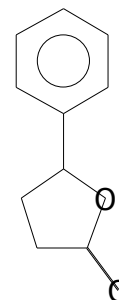

Peak True - sample "Lipid BM 3 F2:1", peak 873, at 1009.27 , 1.115 sec , sec (Spec # 62179)

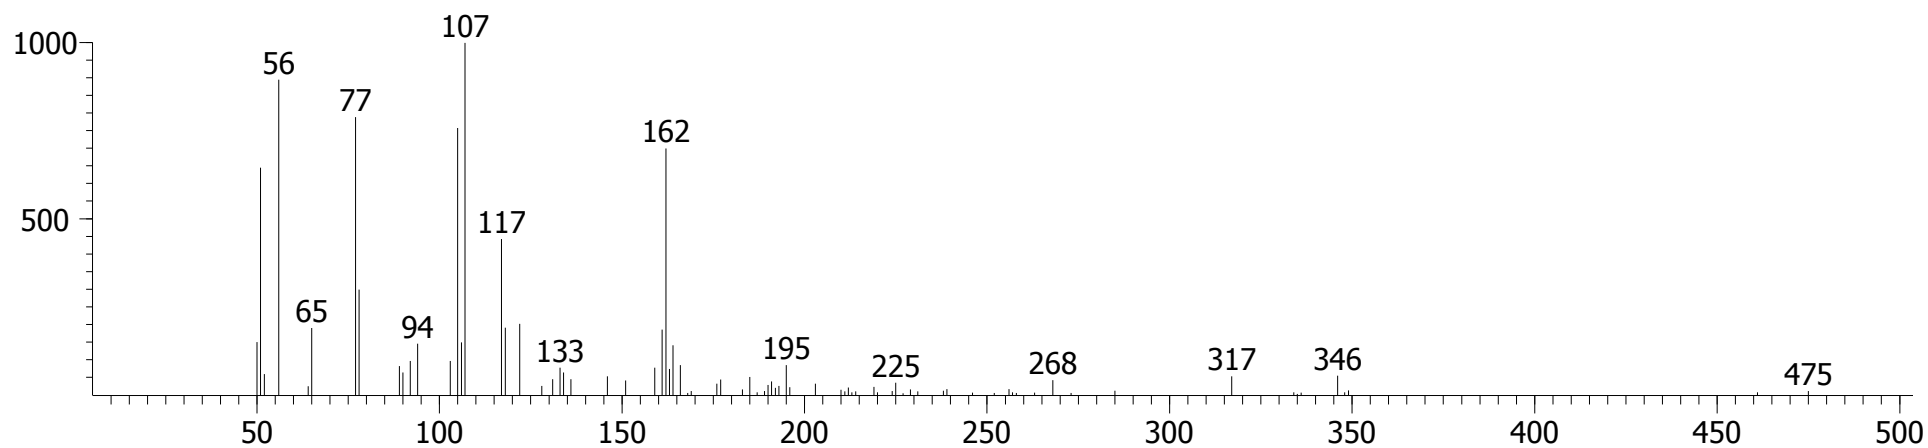

Library Hit - similarity 713, "2(3H)-Furanone, dihydro-5-phenyl-"

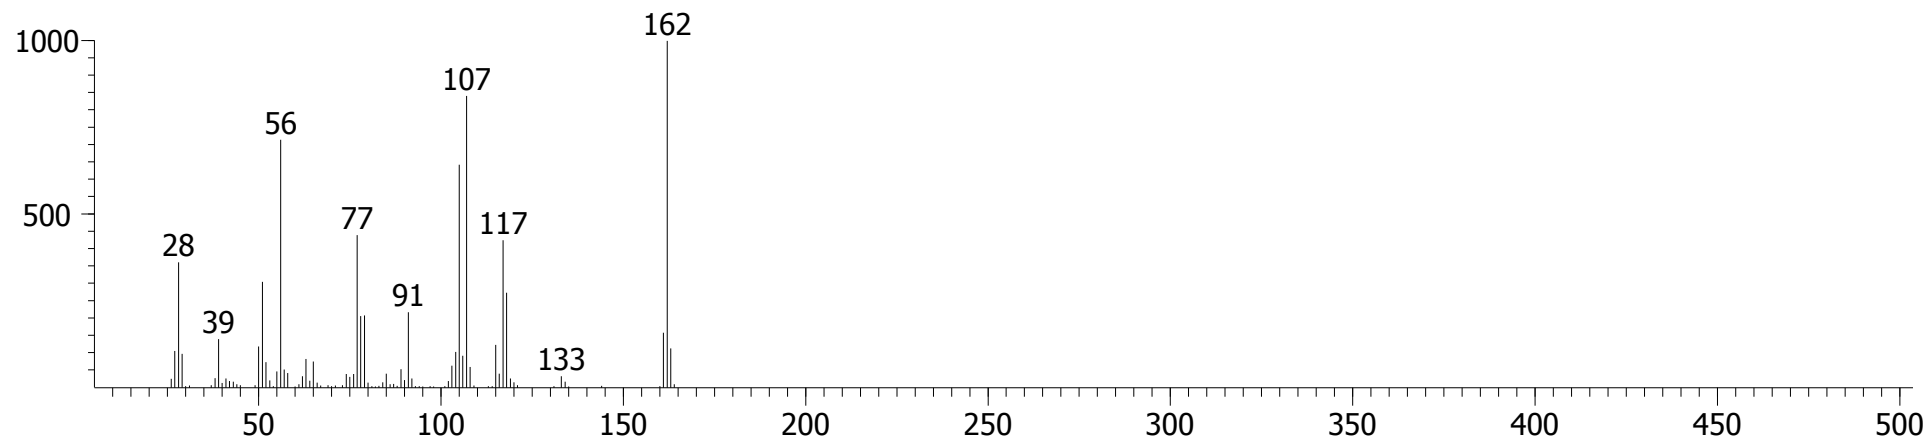

Sample 3, Fraction 2 (DCM)

Naphthalene, 1,4,5-trimethyl-

CAS # = 2131-41-1  
1st Dimension R.T. = 1016.26  
2nd Dimension R.T. = 0.977  
Quant Mass(es) = 170  
S/N = 398.33  
Area = 38748  
Height = 6364.7



(1,4,5-Trimethylnaphthalene)

Peak True - sample "Lipid BM 3 F2:1", peak 893, at 1016.26 , 0.977 sec , sec (Spec # 63218)

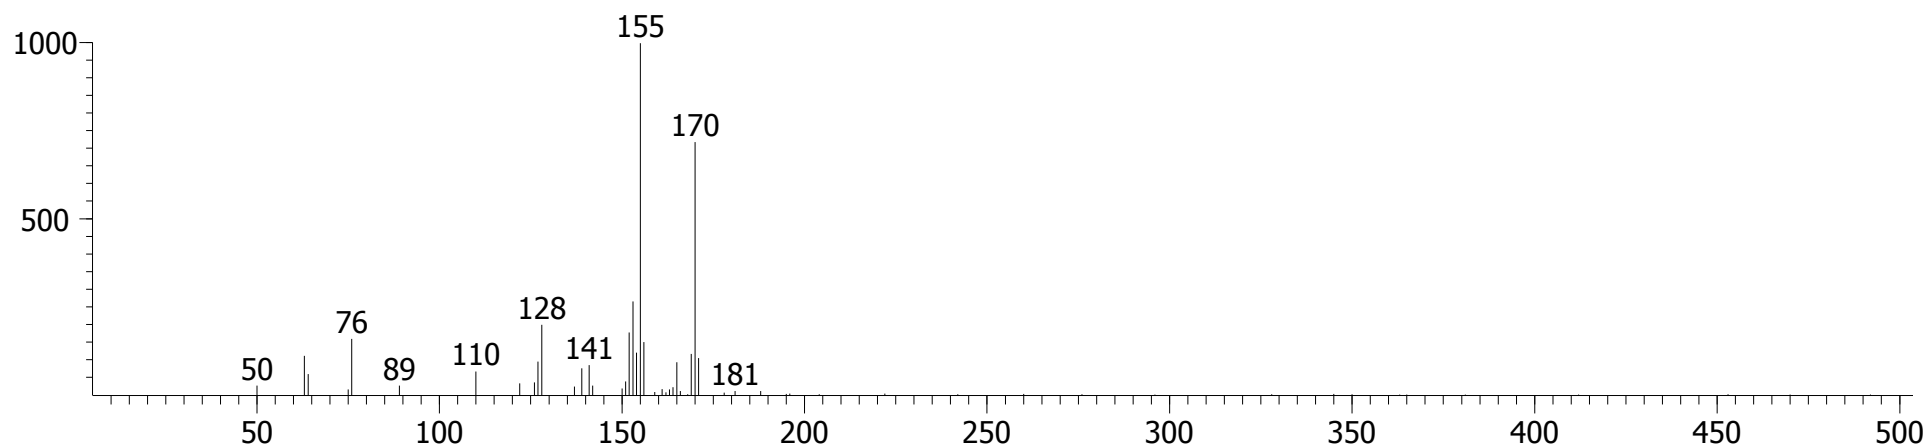

Library Hit - similarity 906, "Naphthalene, 1,4,5-trimethyl-"



Sample 3, Fraction 2 (DCM)

4-Chloroformanilide

(N-(4-Chlorophenyl)formamide)

CAS # = 2617-79-0  
1st Dimension R.T. = 1016.26  
2nd Dimension R.T. = 1.129  
Quant Mass(es) = 155  
S/N = 778.52  
Area = 99088  
Height = 18322



Peak True - sample "Lipid BM 3 F2:1", peak 895, at 1016.26 , 1.129 sec , sec (Spec # 63241)

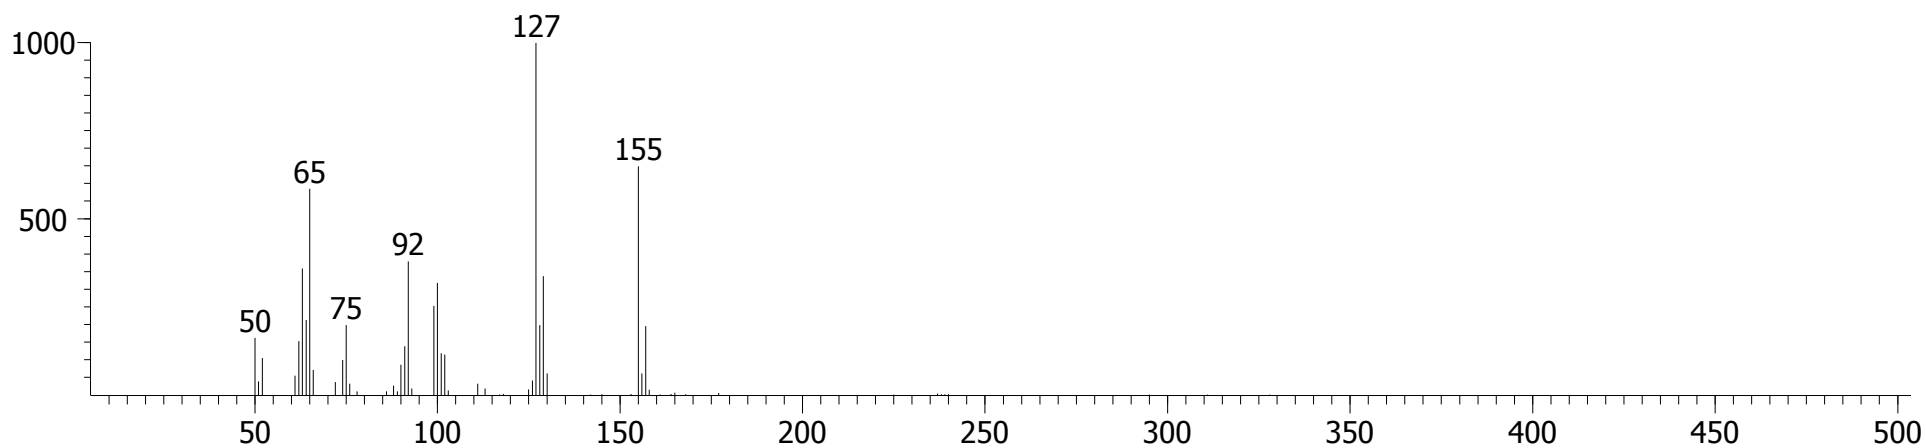

Library Hit - similarity 934, "4-Chloroformanilide"





Sample 3, Fraction 2 (DCM)

Naphthalene, 1,4,5-trimethyl-

CAS # = 2131-41-1  
1st Dimension R.T. = 1026.76  
2nd Dimension R.T. = 0.997  
Quant Mass(es) = 170  
S/N = 156.15  
Area = 9995.4  
Height = 1280.2



(1,4,5-Trimethylnaphthalene)

Peak True - sample "Lipid BM 3 F2:1", peak 923, at 1026.76 , 0.997 sec , sec (Spec # 64811)

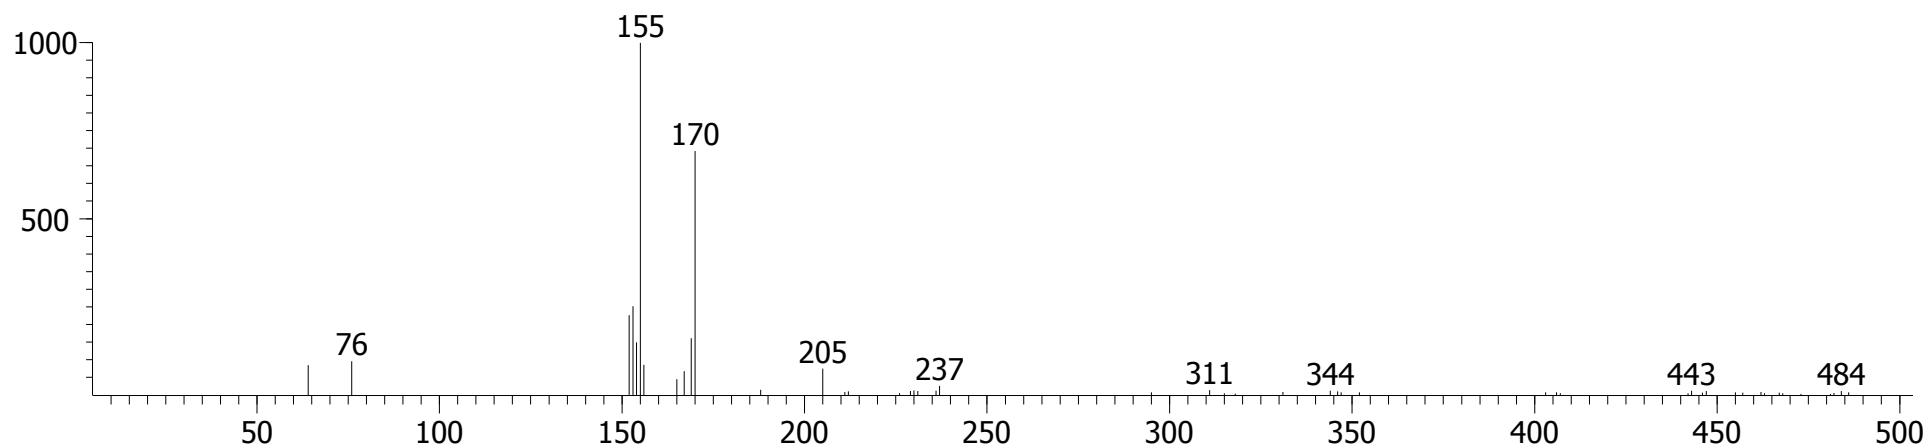

Library Hit - similarity 788, "Naphthalene, 1,4,5-trimethyl-"



Sample 3, Fraction 2 (DCM)

Benzene, 1-chloro-4-phenoxy-

(4-Chlorodiphenyl ether)

CAS # = 7005-72-3  
1st Dimension R.T. = 1058.24  
2nd Dimension R.T. = 1.010  
Quant Mass(es) = 204  
S/N = 5422.0  
Area = 336747  
Height = 61592

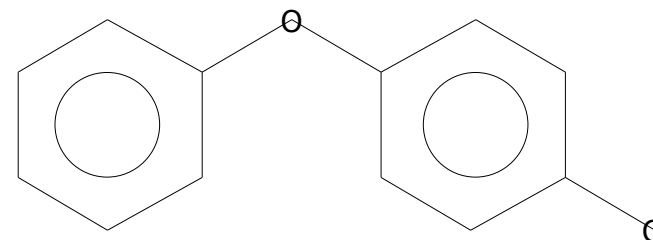

Peak True - sample "Lipid BM 3 F2:1", peak 1038, at 1058.24 , 1.010 sec , sec (Spec # 69583)

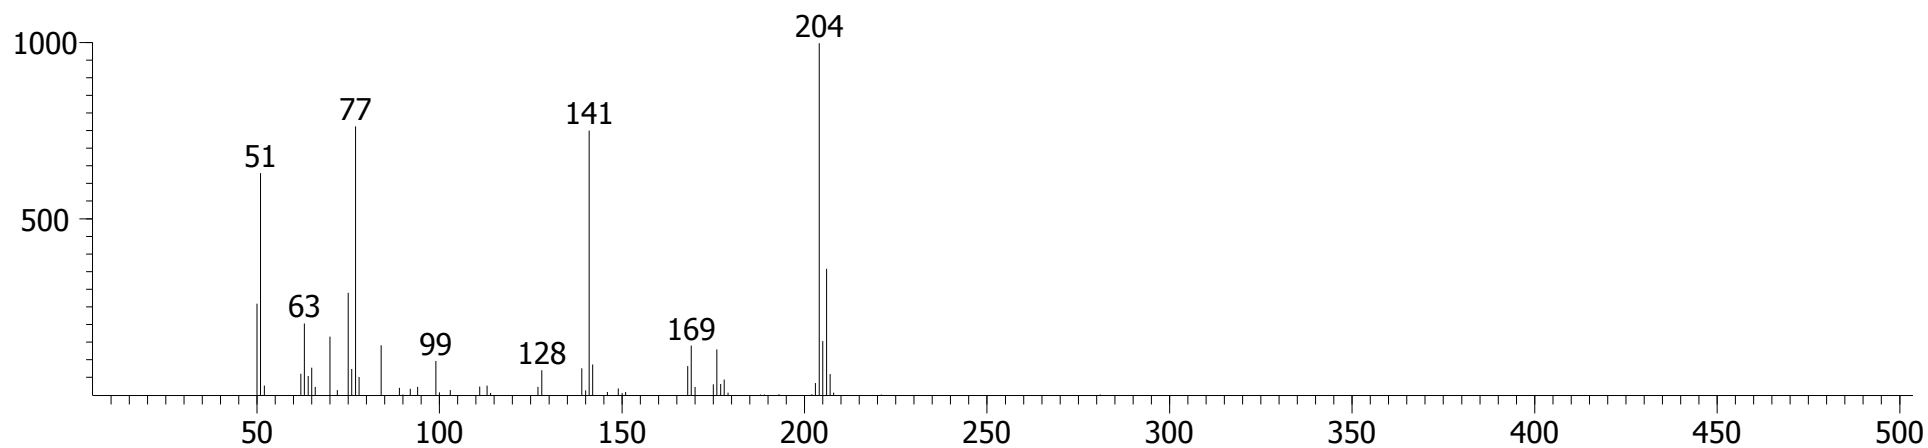

Library Hit - similarity 889, "Benzene, 1-chloro-4-phenoxy-"

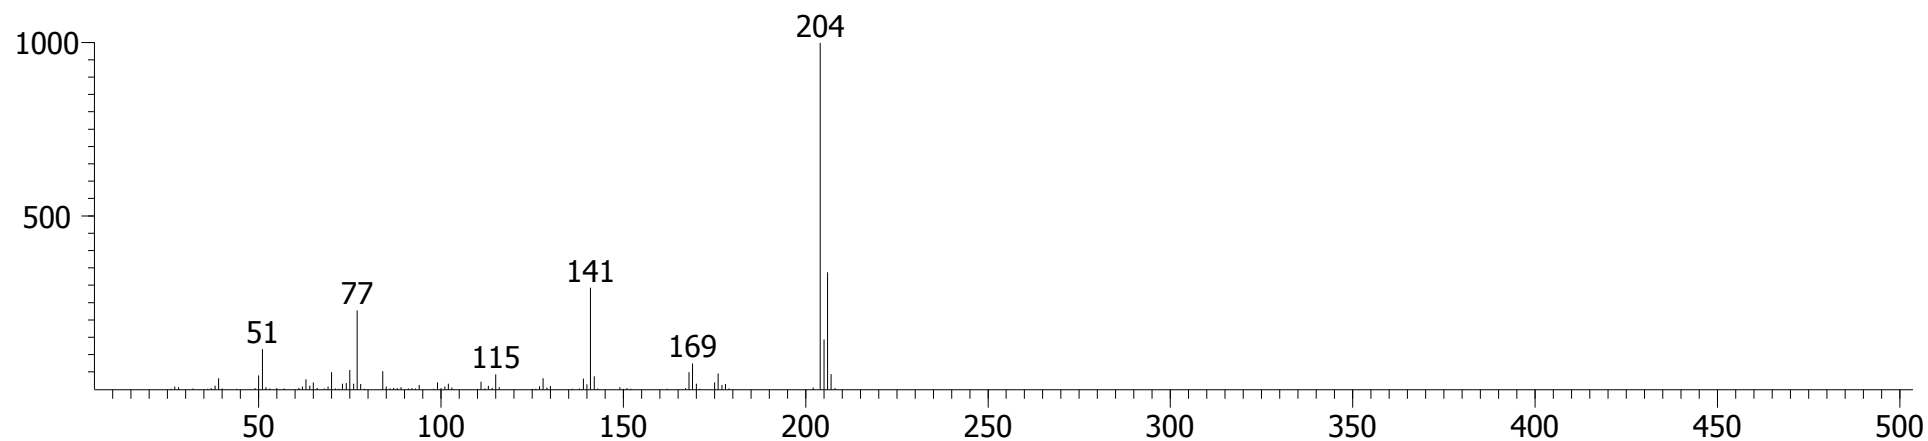

# Sample 3, Fraction 2 (DCM)

## Benzophenone

CAS # = 119-61-9  
1st Dimension R.T. = 1082.72  
2nd Dimension R.T. = 1.076  
Quant Mass(es) = 182  
S/N = 724.74  
Area = 67467  
Height = 9933.4



Peak True - sample "Lipid BM 3 F2:1", peak 1124, at 1082.72 , 1.076 sec , sec (Spec # 73303)

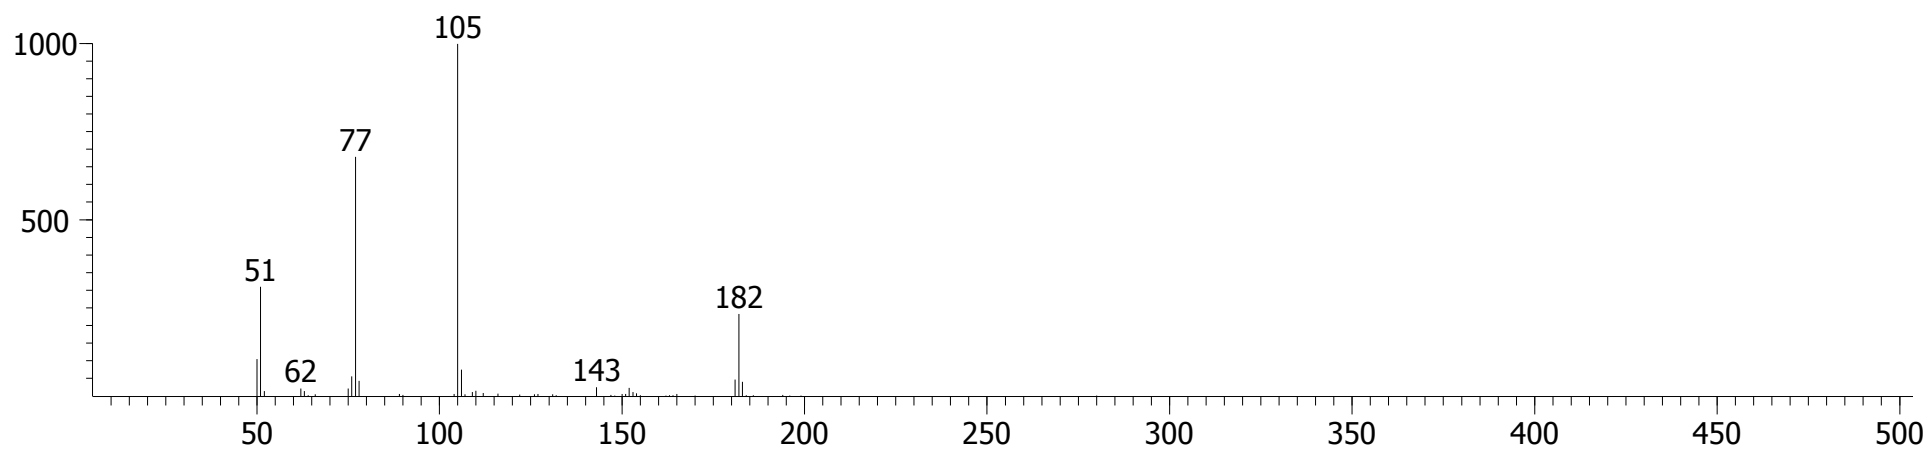

Library Hit - similarity 919, "Benzophenone"

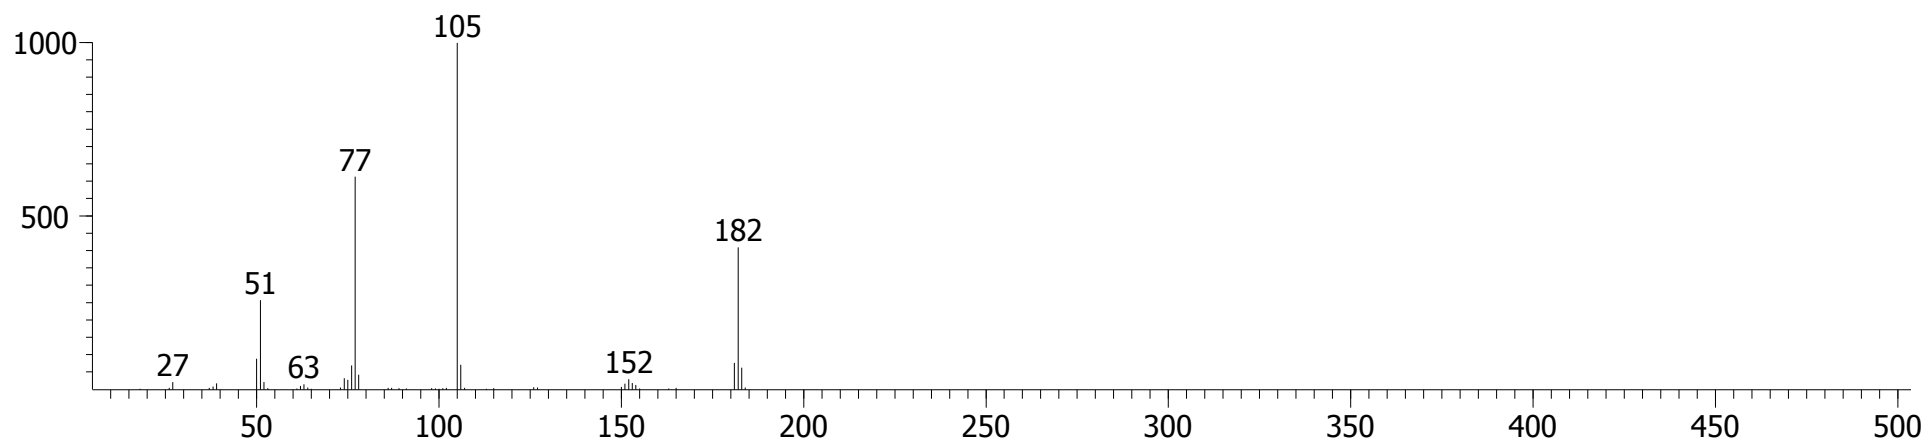

Sample 3, Fraction 2 (DCM)

2H-1-Benzopyran-2-one, 8-methoxy-

CAS # = 2445-81-0  
1st Dimension R.T. = 1121.2  
2nd Dimension R.T. = 0.937  
Quant Mass(es) = 176  
S/N = 607.64  
Area = 49116  
Height = 8204.3

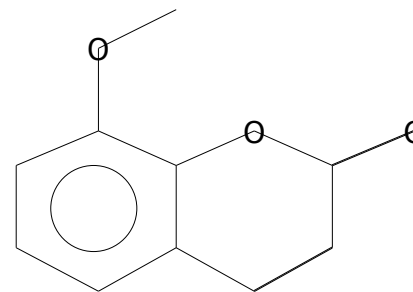

Peak True - sample "Lipid BM 3 F2:1", peak 1260, at 1121.2 , 0.937 sec , sec (Spec # 79112)

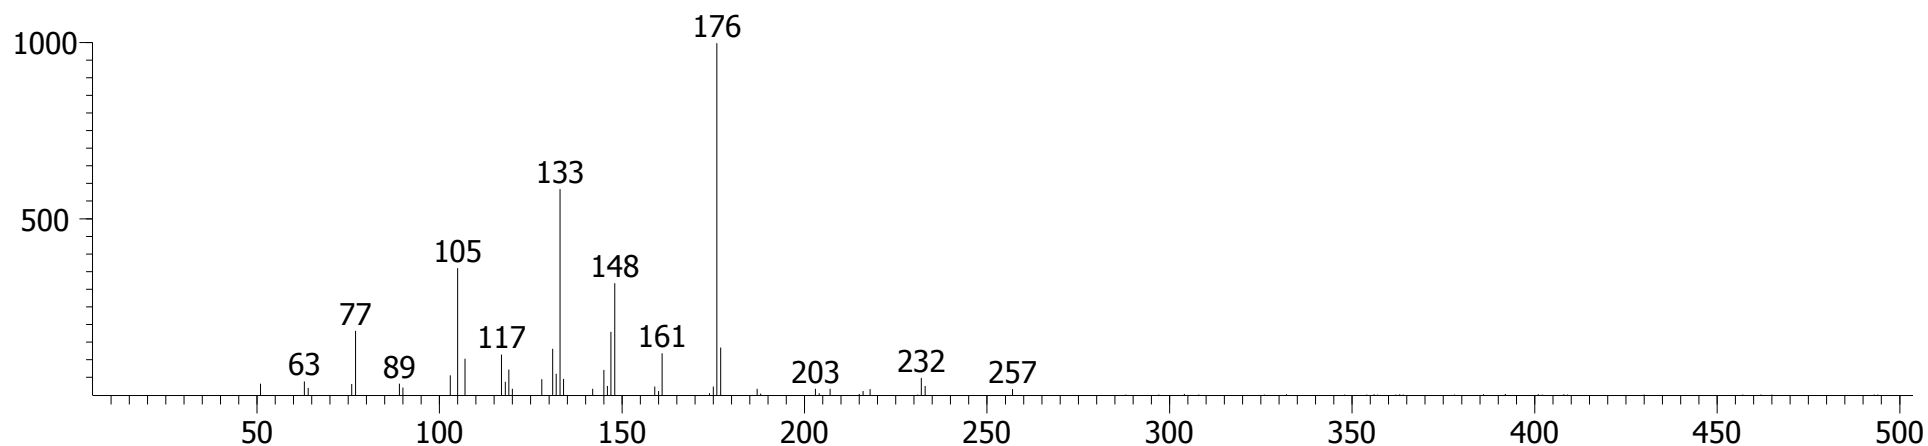

Library Hit - similarity 739, "2H-1-Benzopyran-2-one, 8-methoxy-"

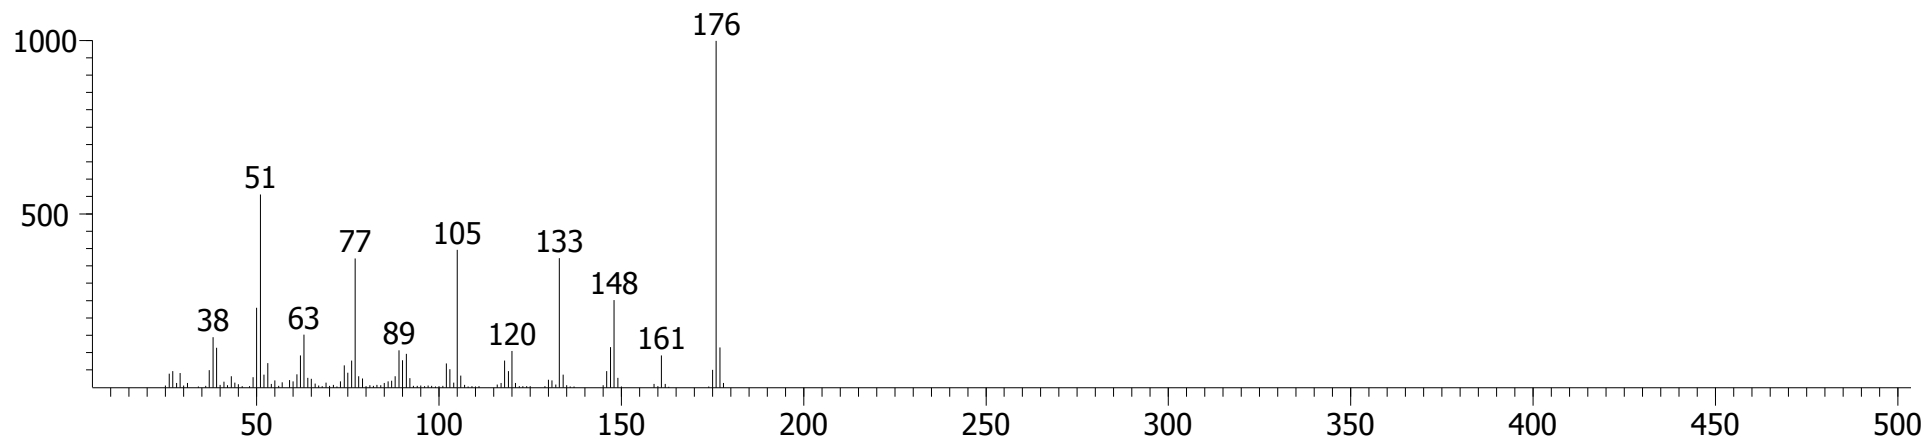

# Sample 3, Fraction 2 (DCM)

## 3,5-di-tert-Butyl-4-hydroxybenzaldehyde

CAS # = 1620-98-0  
1st Dimension R.T. = 1166.68  
2nd Dimension R.T. = 0.997  
Quant Mass(es) = 234  
S/N = 1213.7  
Area = 23136  
Height = 3548.5

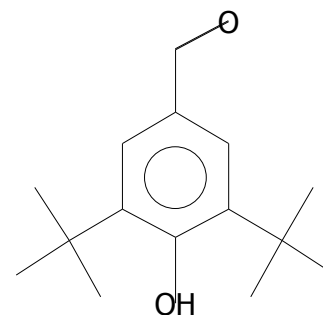

Peak True - sample "Lipid BM 3 F2:1", peak 1420, at 1166.68 , 0.997 sec , sec (Spec # 86011)

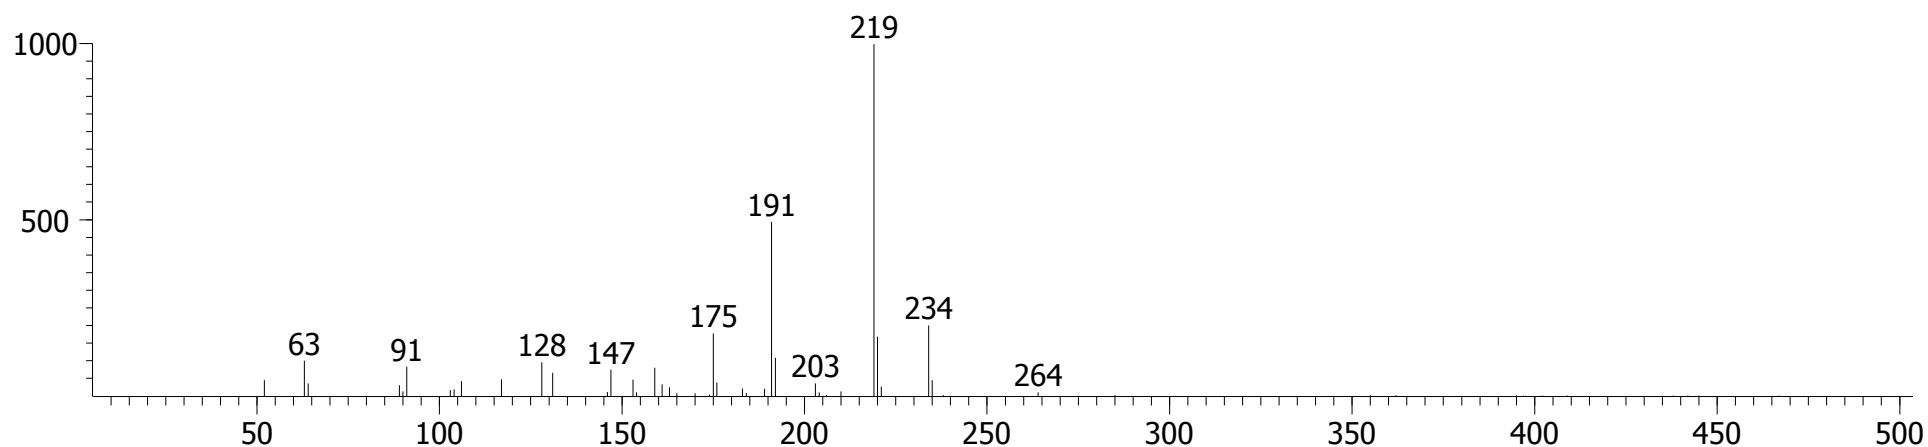

Library Hit - similarity 861, "3,5-di-tert-Butyl-4-hydroxybenzaldehyde"



# Sample 3, Fraction 2 (DCM)

## UNKNOWN # 5

CAS # = 117-71-5  
1st Dimension R.T. = 1180.67  
2nd Dimension R.T. = 1.069  
Quant Mass(es) = 220  
S/N = 3852.0  
Area = 196897  
Height = 33635



Peak True - sample "Lipid BM 3 F2:1", peak 1479, at 1180.67 , 1.069 sec , sec (Spec # 88142)

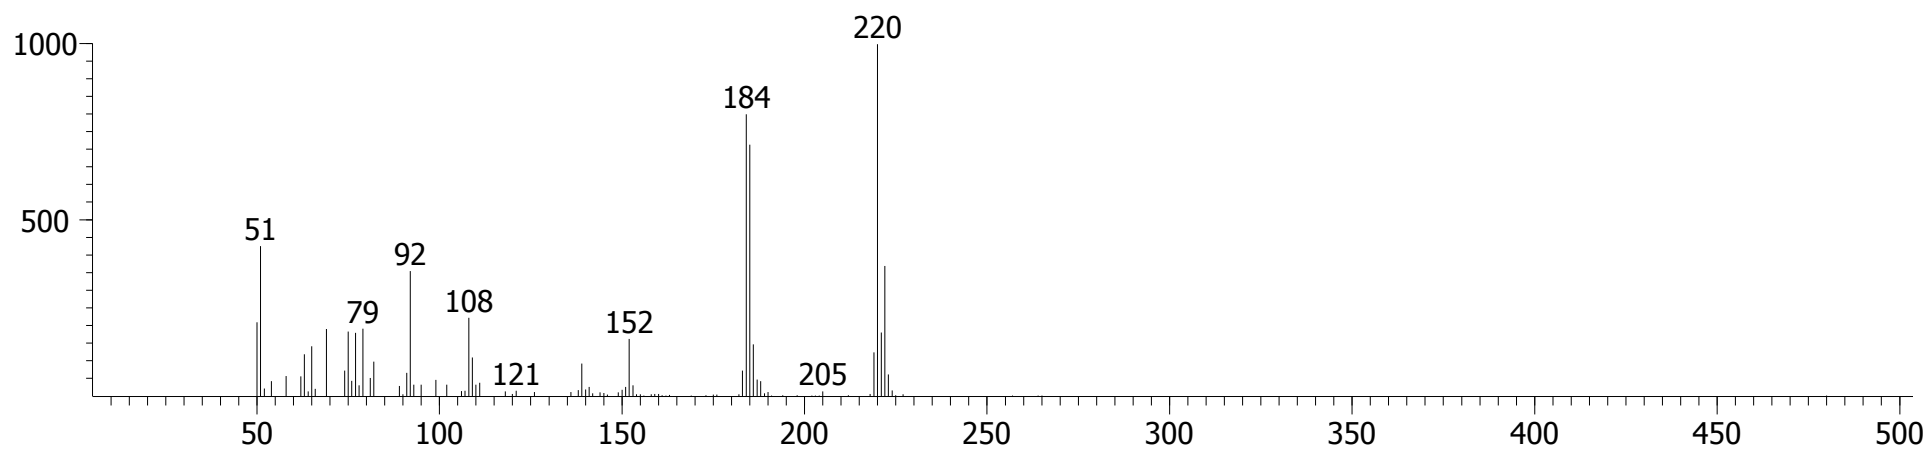

Library Hit - similarity 665, "[1,1'-Biphenyl]-2,5-diol, 2'-chloro-"

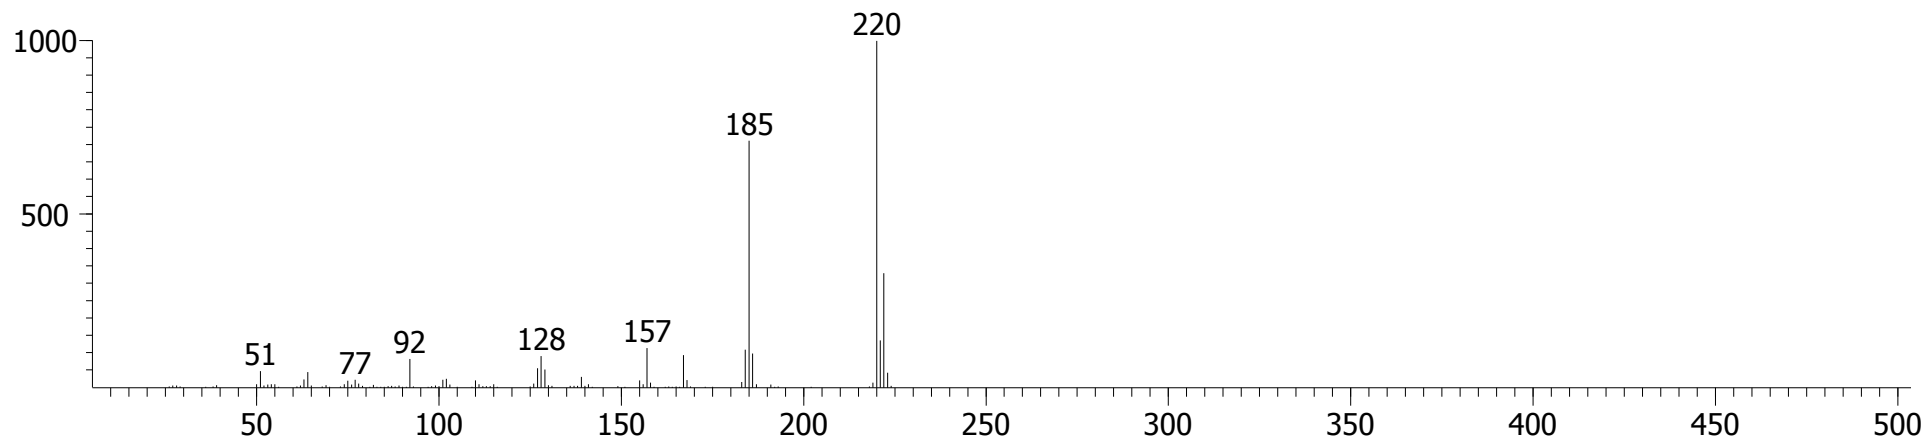

# Sample 3, Fraction 2 (DCM)

## Phenanthrene

CAS # = 85-01-8  
1st Dimension R.T. = 1194.66  
2nd Dimension R.T. = 1.129  
Quant Mass(es) = 178  
S/N = 382.60  
Area = 30602  
Height = 5425.1



Peak True - sample "Lipid BM 3 F2:1", peak 1535, at 1194.66 , 1.129 sec , sec (Spec # 90271)

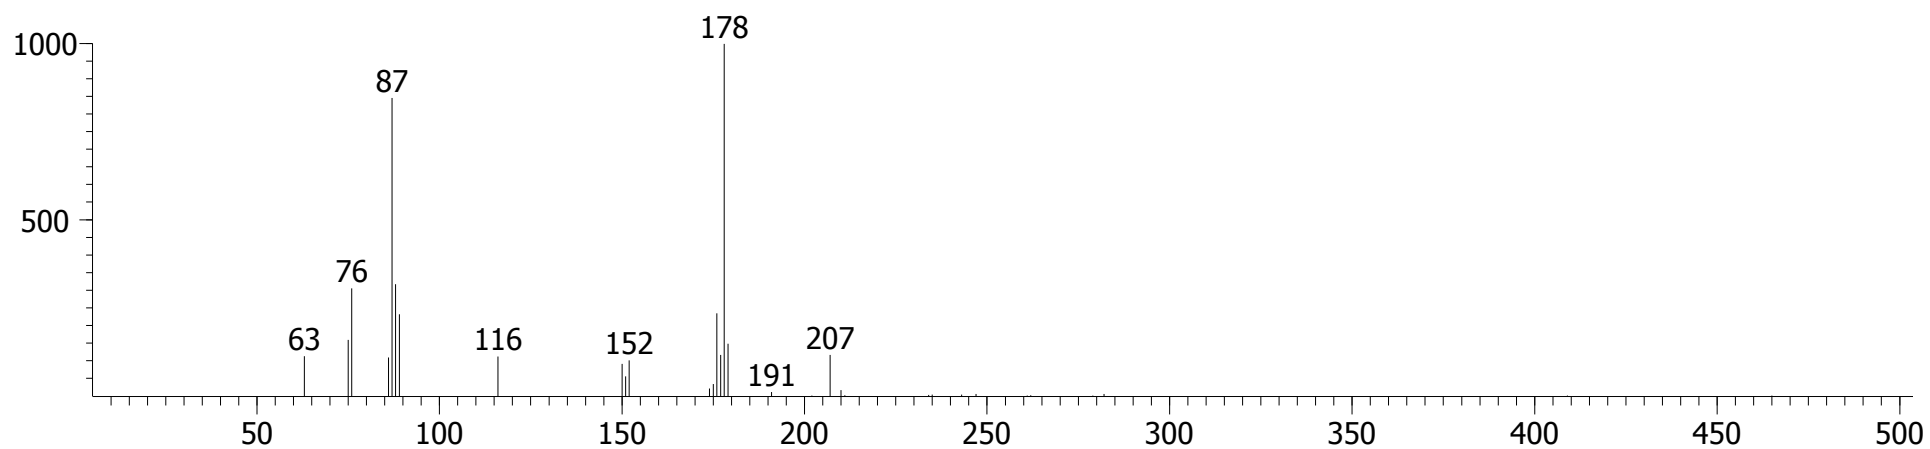

Library Hit - similarity 822, "Phenanthrene"

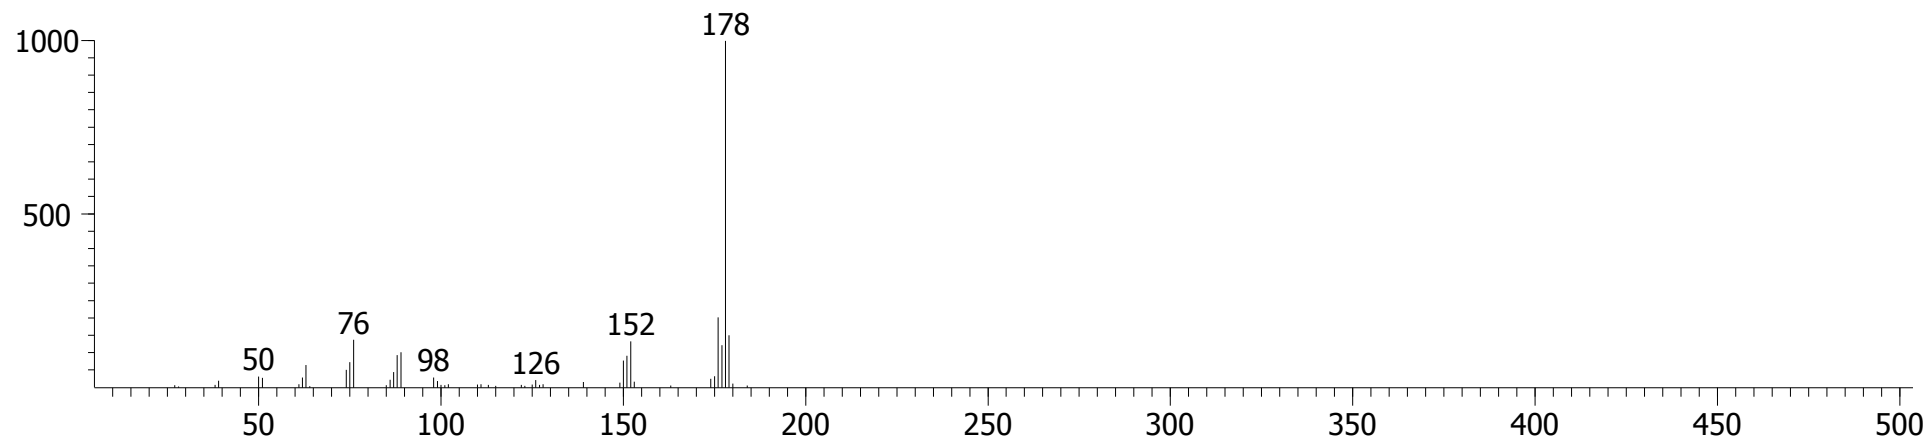

# Sample 3, Fraction 2 (DCM)

## 4,4'-Dichlorodiphenylsulphide

CAS # = 5181-10-2  
1st Dimension R.T. = 1296.1  
2nd Dimension R.T. = 1.109  
Quant Mass(es) = 254  
S/N = 668.23  
Area = 70892  
Height = 7533.4



Peak True - sample "Lipid BM 3 F2:1", peak 1954, at 1296.1 , 1.109 sec , sec (Spec # 105638)

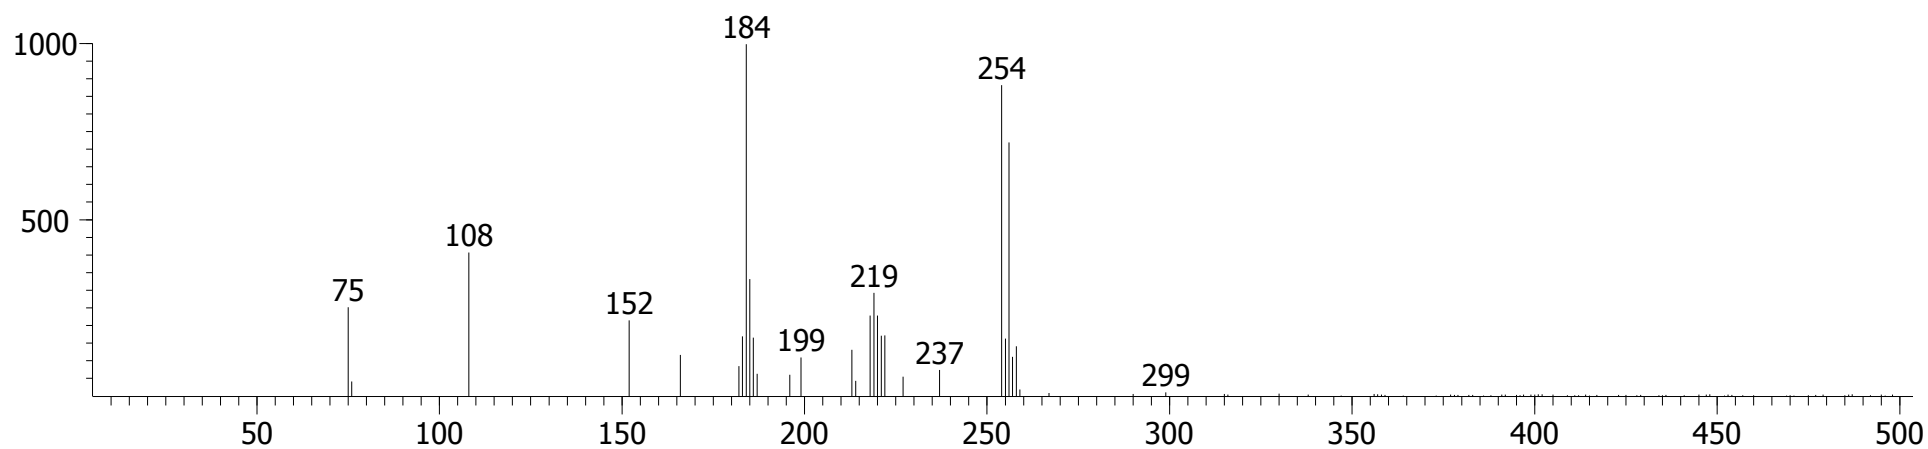

Library Hit - similarity 814, "4,4'-Dichlorodiphenylsulphide"

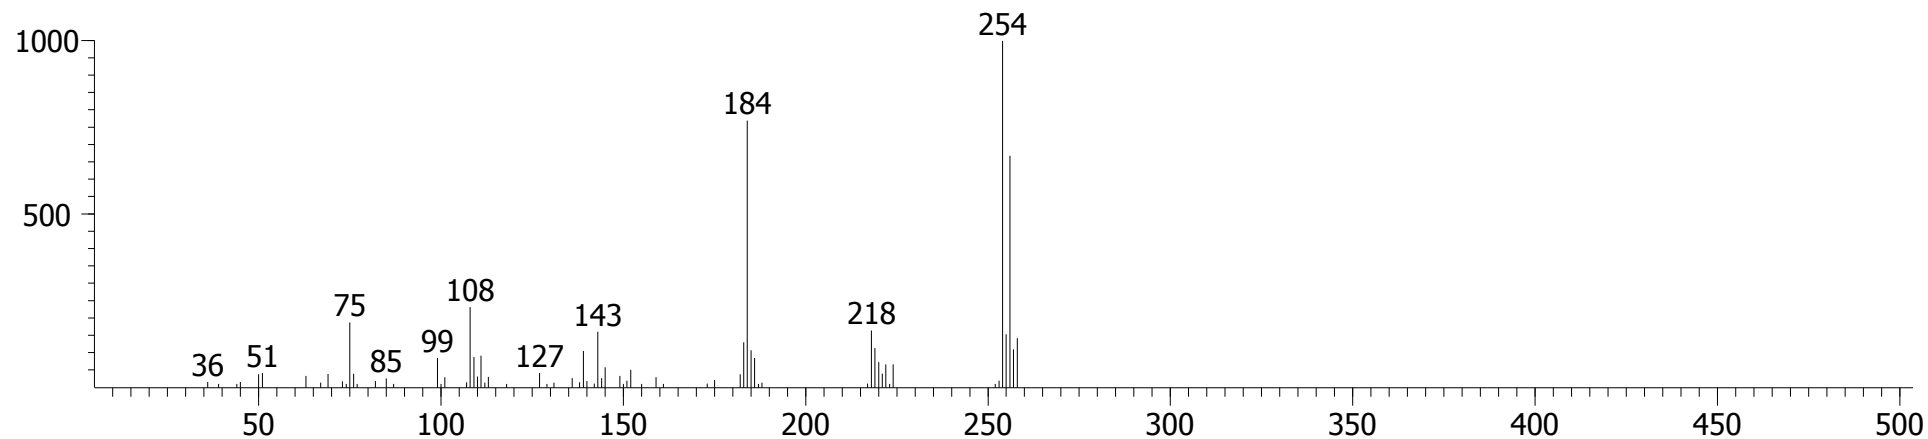



# Sample 3, Fraction 2 (DCM)

## UNKNOWN # 6

CAS # = 0-00-0  
1st Dimension R.T. = 1310.09  
2nd Dimension R.T. = 2.554  
Quant Mass(es) = 271  
S/N = 43.194  
Area = 4896.8  
Height = 328.41

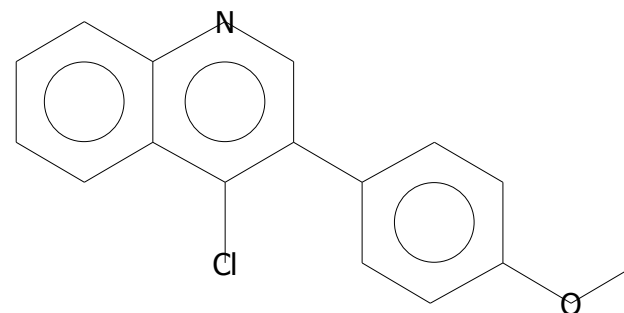

Peak True - sample "Lipid BM 3 F2:1", peak 2000, at 1310.09 , 2.554 sec , sec (Spec # 107977)

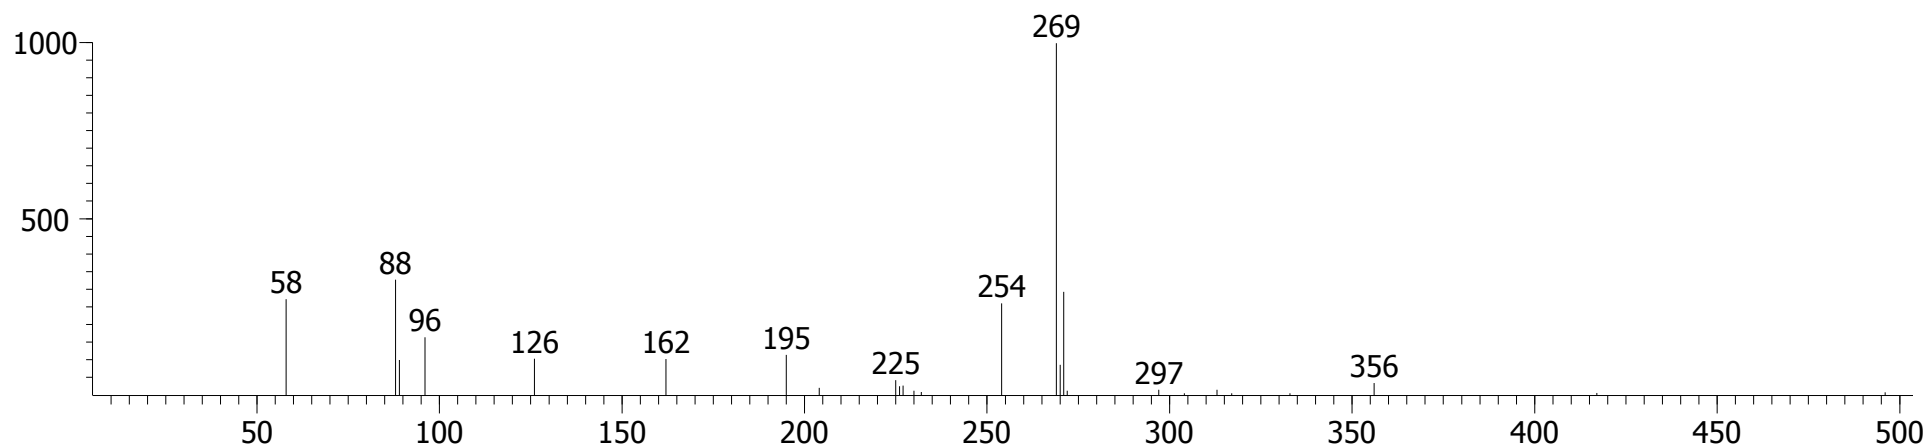

Library Hit - similarity 654, "3-[p-Methoxyphenyl]-4-chloroquinoline"

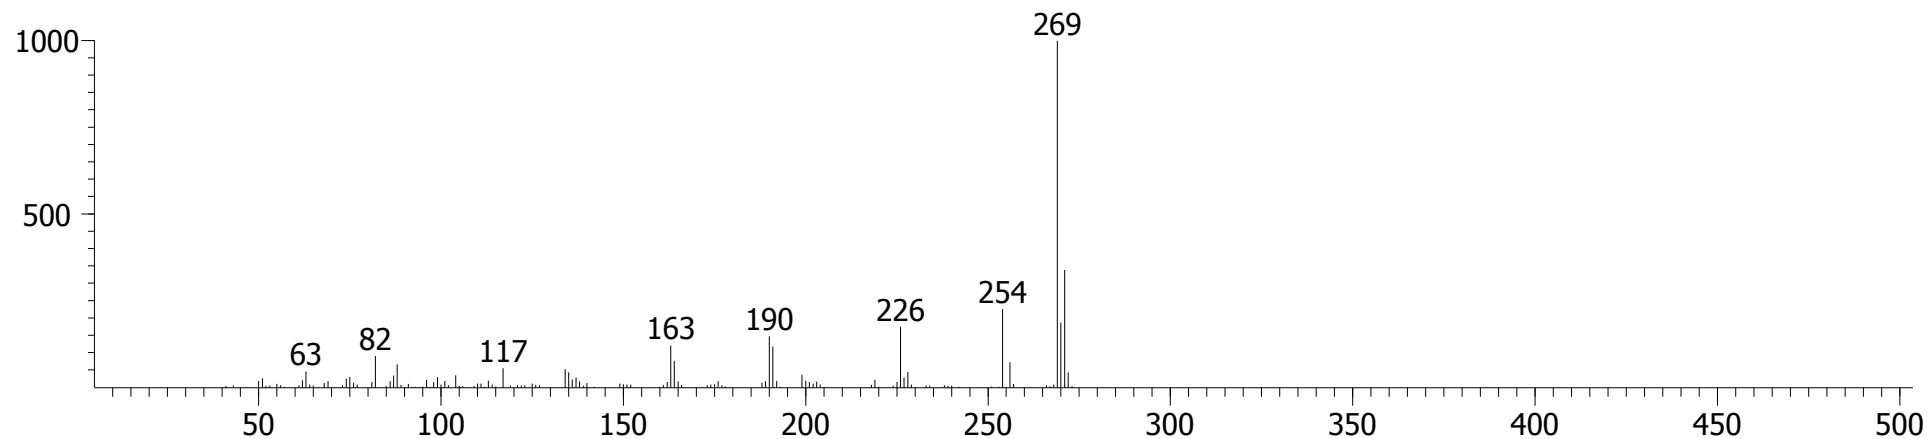

Sample 3, Fraction 2 (DCM)

Phthalic acid, di(oct-3-yl) ester

CAS # = 0-00-0  
1st Dimension R.T. = 1561.95  
2nd Dimension R.T. = 1.155  
Quant Mass(es) = 167  
S/N = 3556.3  
Area = 241595  
Height = 32943



Peak True - sample "Lipid BM 3 F2:1", peak 2979, at 1561.95 , 1.155 sec , sec (Spec # 145925)

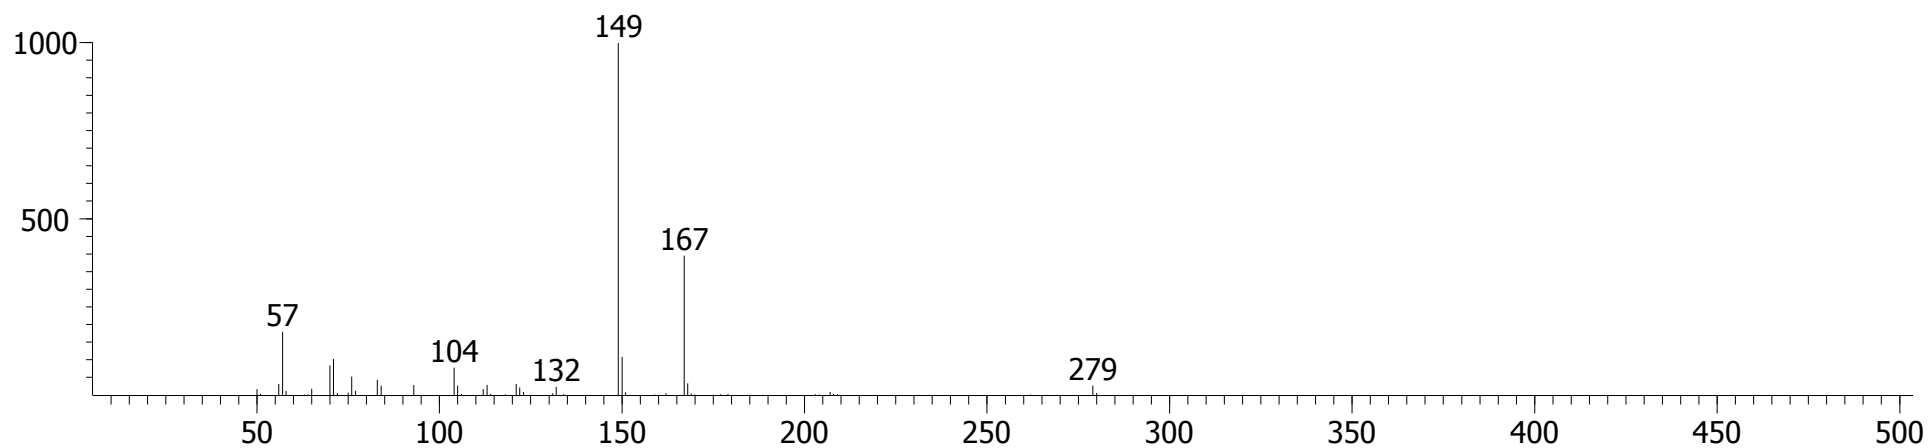

Library Hit - similarity 895, "Phthalic acid, di(oct-3-yl) ester"



Sample 3, Fraction 3 (Water)

1H-Inden-1-one, 2,3-dihydro-

CAS # = 83-33-0  
1st Dimension R.T. = 827.37  
2nd Dimension R.T. = 1.030  
Quant Mass(es) = 132  
S/N = 529.84  
Area = 74899  
Height = 13667

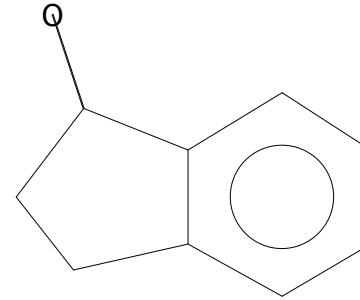

Peak True - sample "BM Water 3:1", peak 422, at 827.37 , 1.030 sec , sec (Spec # 34606)

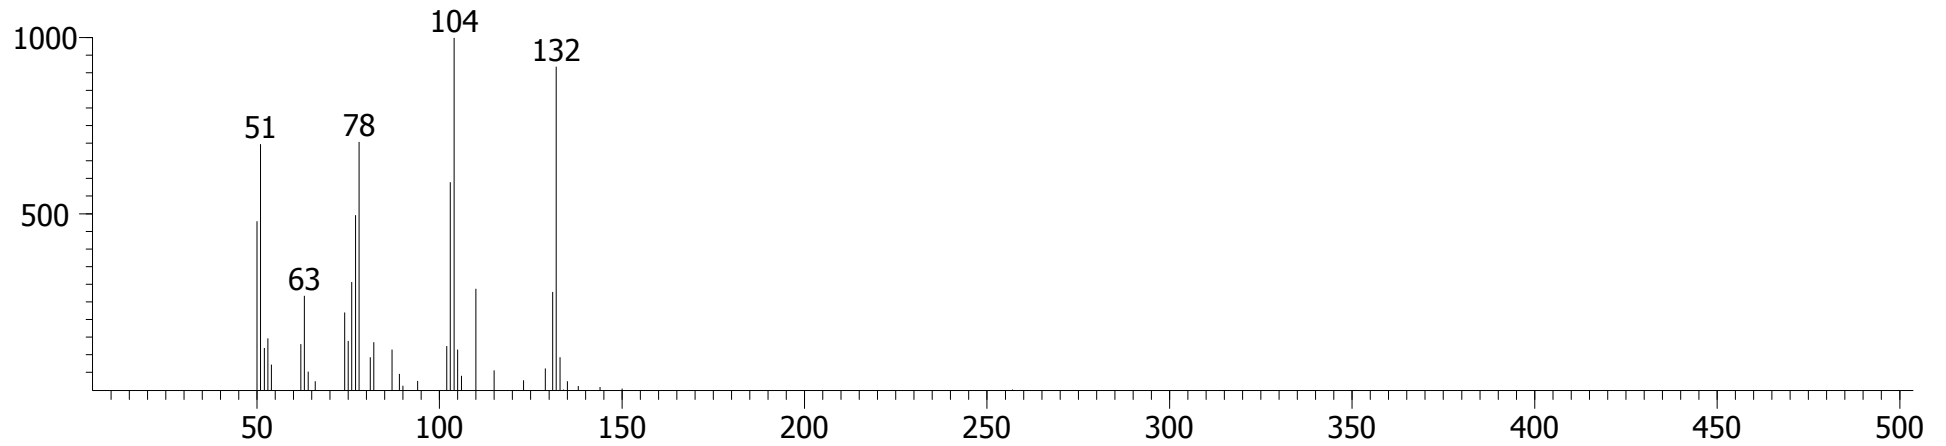

Library Hit - similarity 832, "1H-Inden-1-one, 2,3-dihydro-"

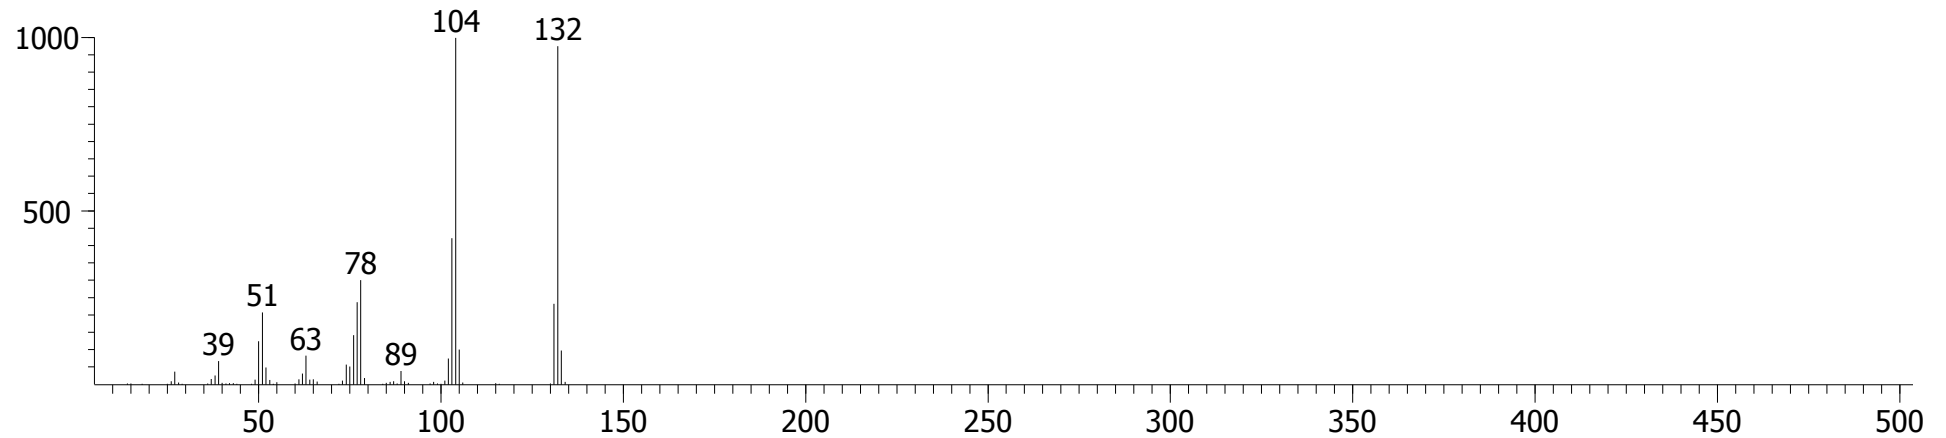

Sample 3, Fraction 3 (Water)

Benzenamine, 4-chloro-N-methyl-

CAS # = 932-96-7  
1st Dimension R.T. = 830.868  
2nd Dimension R.T. = 0.997  
Quant Mass(es) = 140  
S/N = 5372.3  
Area = 627399  
Height = 121460



(4-Chloro-N-methylaniline)

Peak True - sample "BM Water 3:1", peak 431, at 830.868 , 0.997 sec , sec (Spec # 35131)

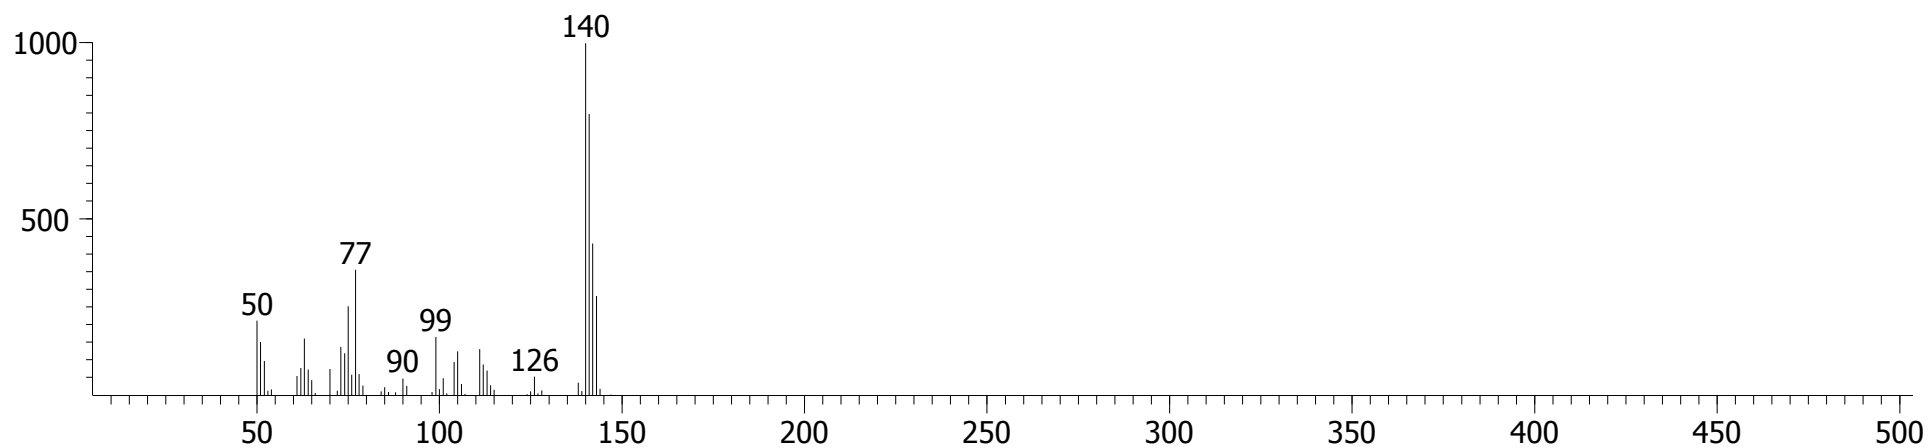

Library Hit - similarity 914, "Benzenamine, 4-chloro-N-methyl-"



# Sample 3, Fraction 3 (Water)

## 5H-1-Pyridine

CAS # = 270-91-7  
1st Dimension R.T. = 834.366  
2nd Dimension R.T. = 1.056  
Quant Mass(es) = 117  
S/N = 1052.1  
Area = 243571  
Height = 46707

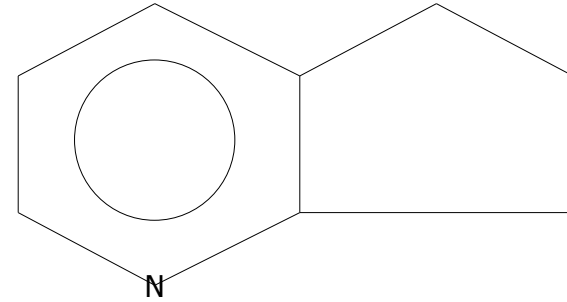

Peak True - sample "BM Water 3:1", peak 439, at 834.366 , 1.056 sec , sec (Spec # 35670)

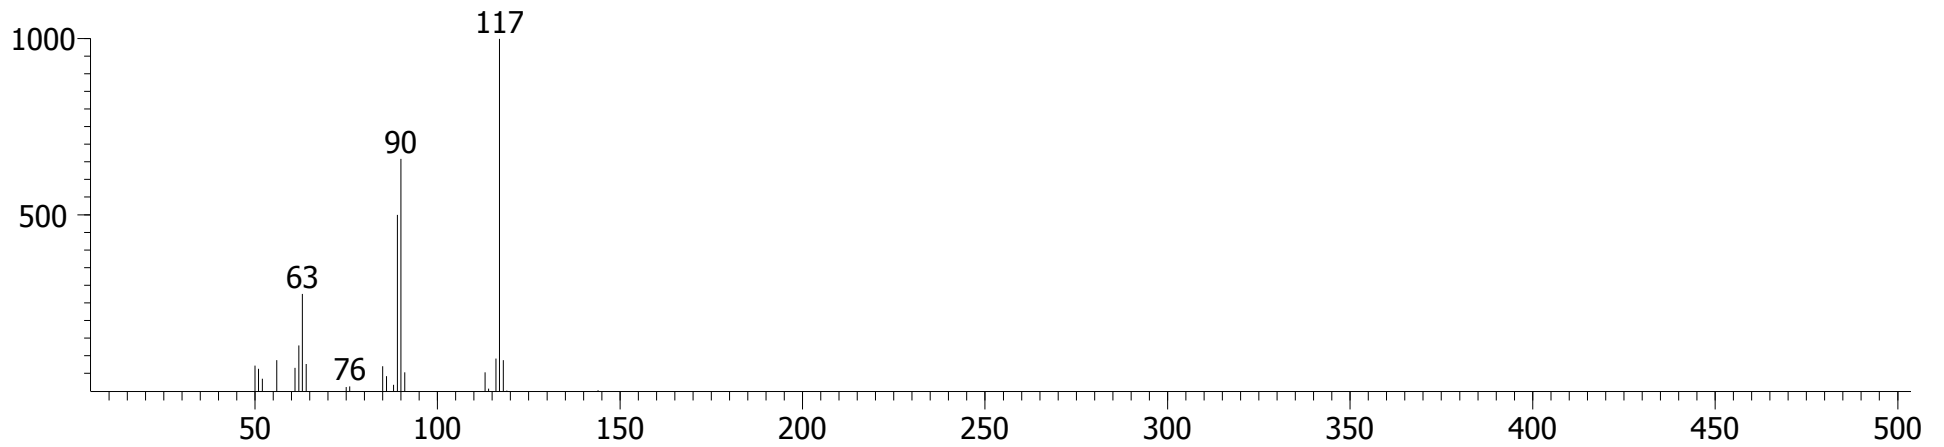

Library Hit - similarity 870, "5H-1-Pyridine"

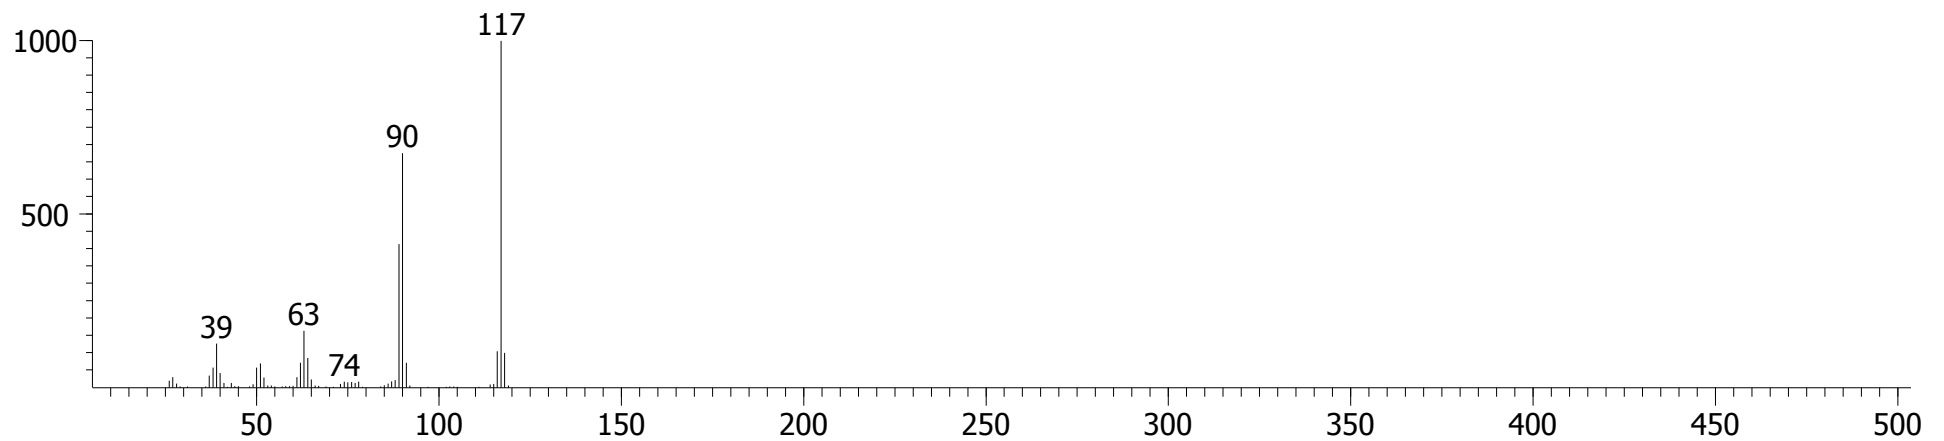

# Sample 3, Fraction 3 (Water)

## Benzene, heptyl-

CAS # = 1078-71-3  
1st Dimension R.T. = 876.342  
2nd Dimension R.T. = 0.878  
Quant Mass(es) = 176  
S/N = 861.40  
Area = 20460  
Height = 3898.0

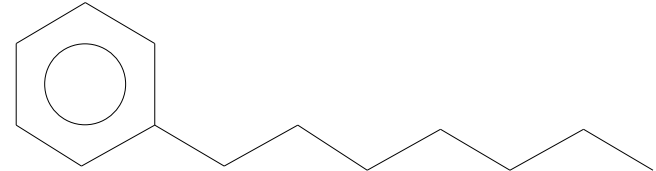

Peak True - sample "BM Water 3:1", peak 522, at 876.342 , 0.878 sec , sec (Spec # 42003)

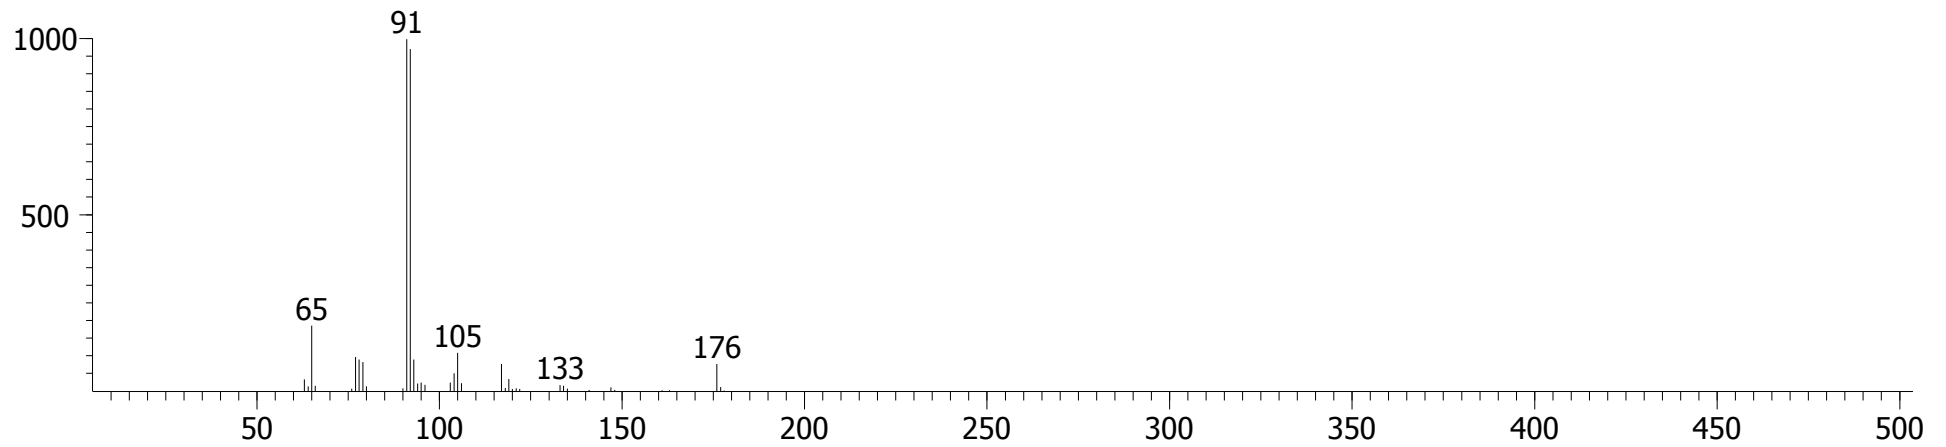

Library Hit - similarity 869, "Benzene, heptyl-"

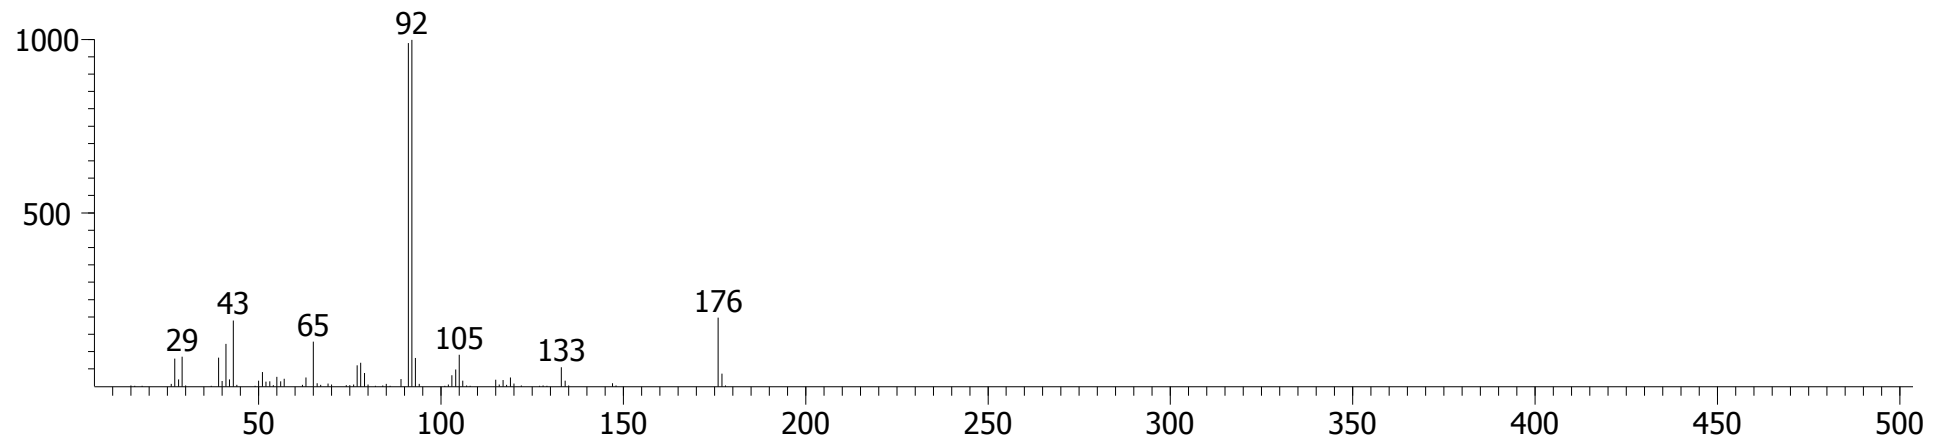

Sample 3, Fraction 3 (Water)

1(3H)-Isobenzofuranone

CAS # = 87-41-2  
1st Dimension R.T. = 883.338  
2nd Dimension R.T. = 1.096  
Quant Mass(es) = 134  
S/N = 106.02  
Area = 9423.9  
Height = 1675.5

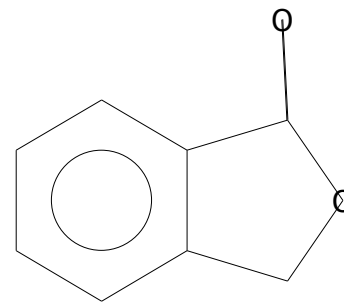

Peak True - sample "BM Water 3:1", peak 553, at 883.338 , 1.096 sec , sec (Spec # 43096)

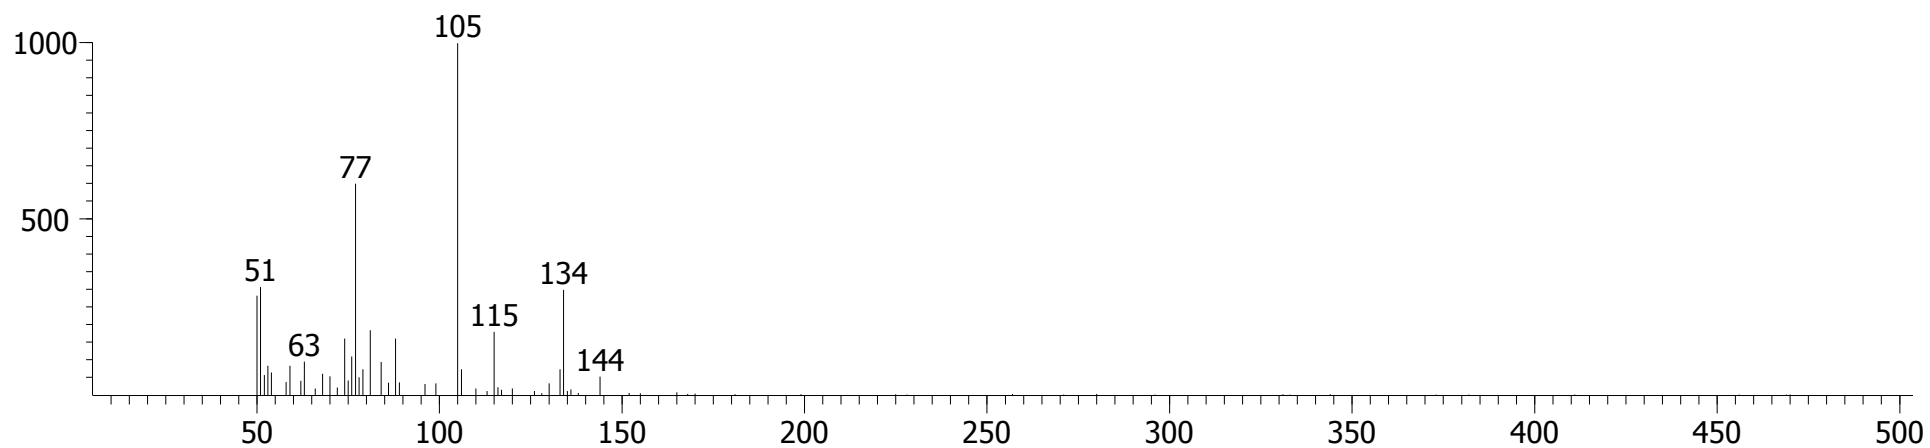

Library Hit - similarity 754, "1(3H)-Isobenzofuranone"

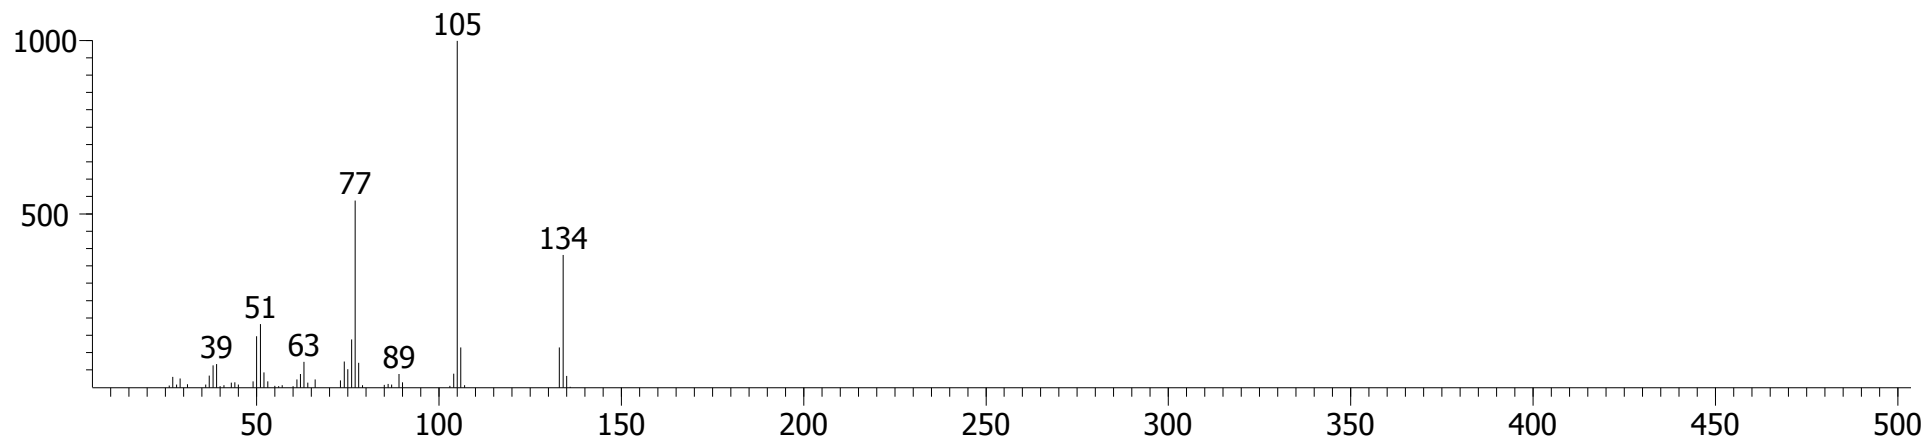

Sample 3, Fraction 3 (Water)

Benzamide

CAS # = 55-21-0  
1st Dimension R.T. = 897.33  
2nd Dimension R.T. = 1.155  
Quant Mass(es) = 121  
S/N = 205.59  
Area = 29340  
Height = 6841.8

(Phenylamide)

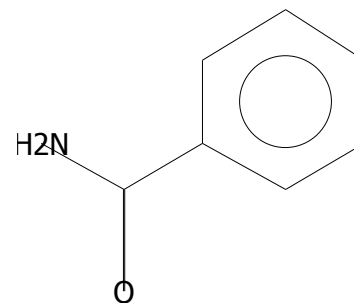

Peak True - sample "BM Water 3:1", peak 590, at 897.33 , 1.155 sec , sec (Spec # 45225)

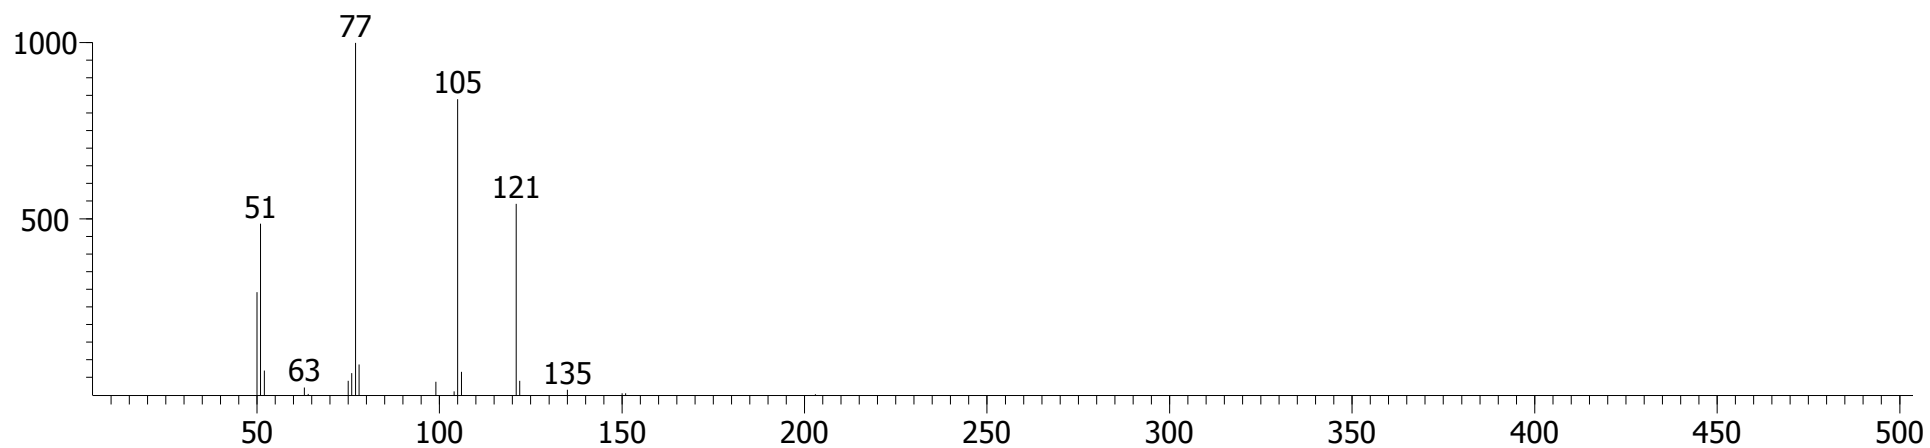

Library Hit - similarity 935, "Benzamide"





Sample 3, Fraction 3 (Water)

1H-Indole, 2-methyl-

CAS # = 95-20-5  
1st Dimension R.T. = 911.322  
2nd Dimension R.T. = 1.049  
Quant Mass(es) = 130  
S/N = 973.06  
Area = 911813  
Height = 110884

(2-Methylindole)

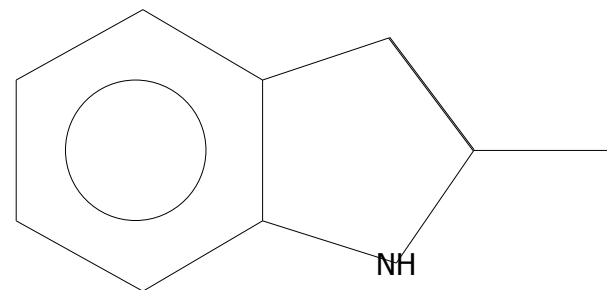

Peak True - sample "BM Water 3:1", peak 638, at 911.322 , 1.049 sec , sec (Spec # 47329)

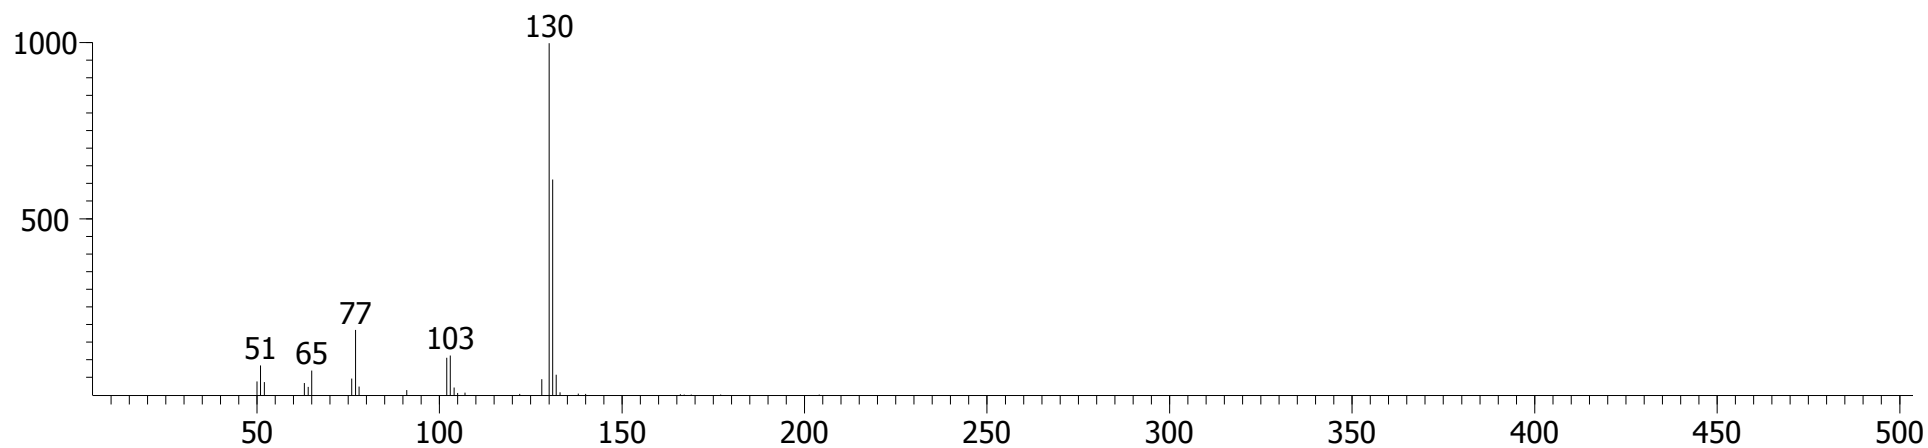

Library Hit - similarity 941, "1H-Indole, 2-methyl-"



Sample 3, Fraction 3 (Water)

7-Methylindan-1-one

CAS # = 39627-61-7  
1st Dimension R.T. = 932.31  
2nd Dimension R.T. = 1.043  
Quant Mass(es) = 146  
S/N = 414.46  
Area = 38744  
Height = 7112.4



Peak True - sample "BM Water 3:1", peak 697, at 932.31 , 1.043 sec , sec (Spec # 50508)

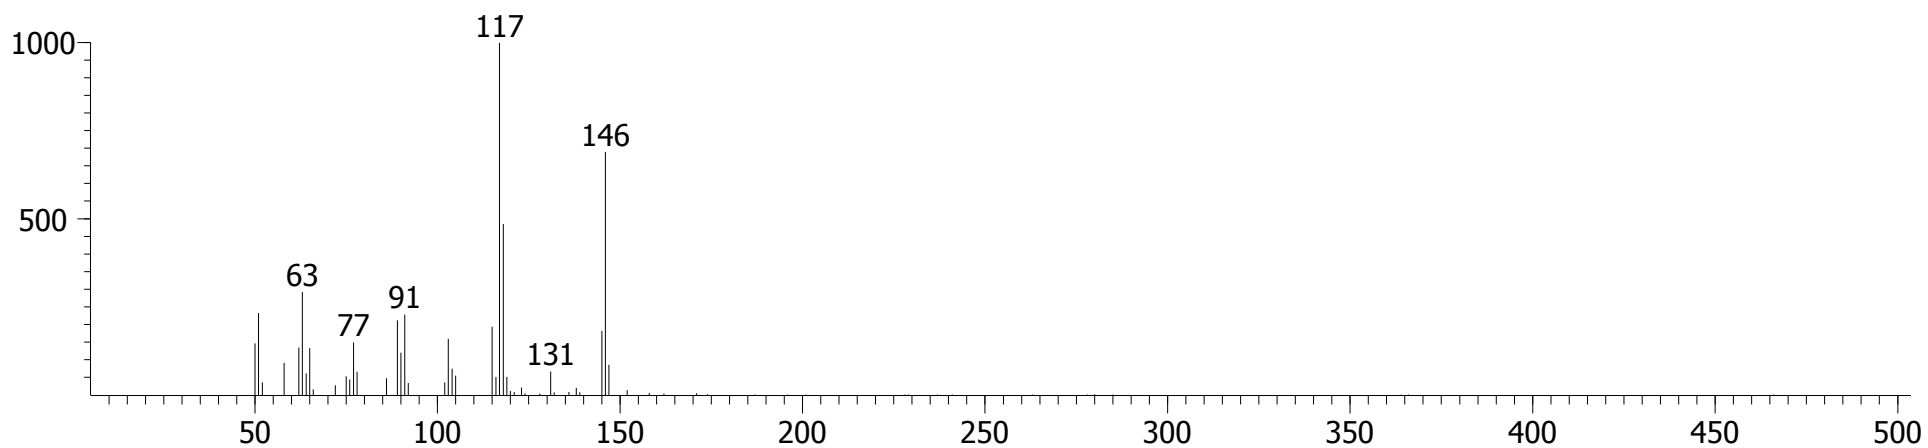

Library Hit - similarity 853, "7-Methylindan-1-one"

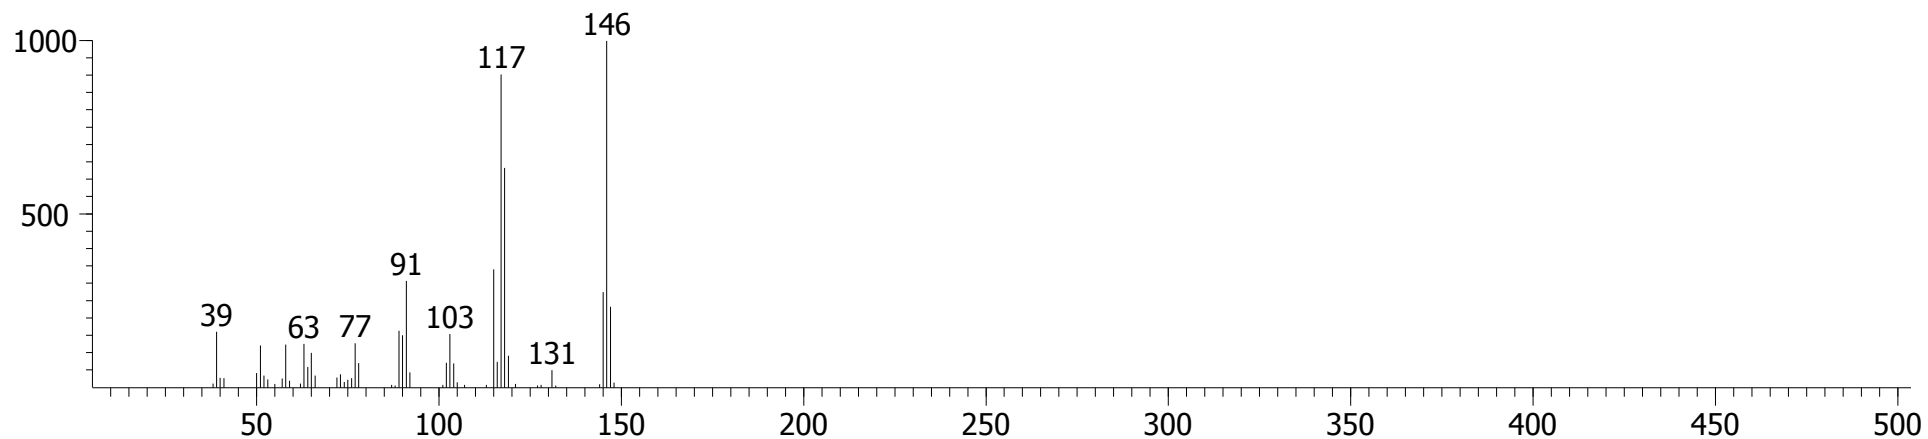

# Sample 3, Fraction 3 (Water)

## Benzoic acid, 3-hydroxy-, methyl ester

CAS # = 19438-10-9  
1st Dimension R.T. = 953.298  
2nd Dimension R.T. = 1.056  
Quant Mass(es) = 152  
S/N = 524.45  
Area = 72335  
Height = 10860

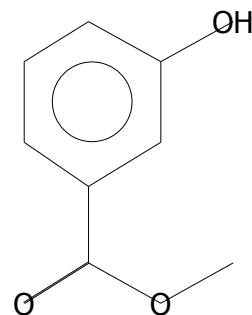

Peak True - sample "BM Water 3:1", peak 760, at 953.298 , 1.056 sec , sec (Spec # 53690)

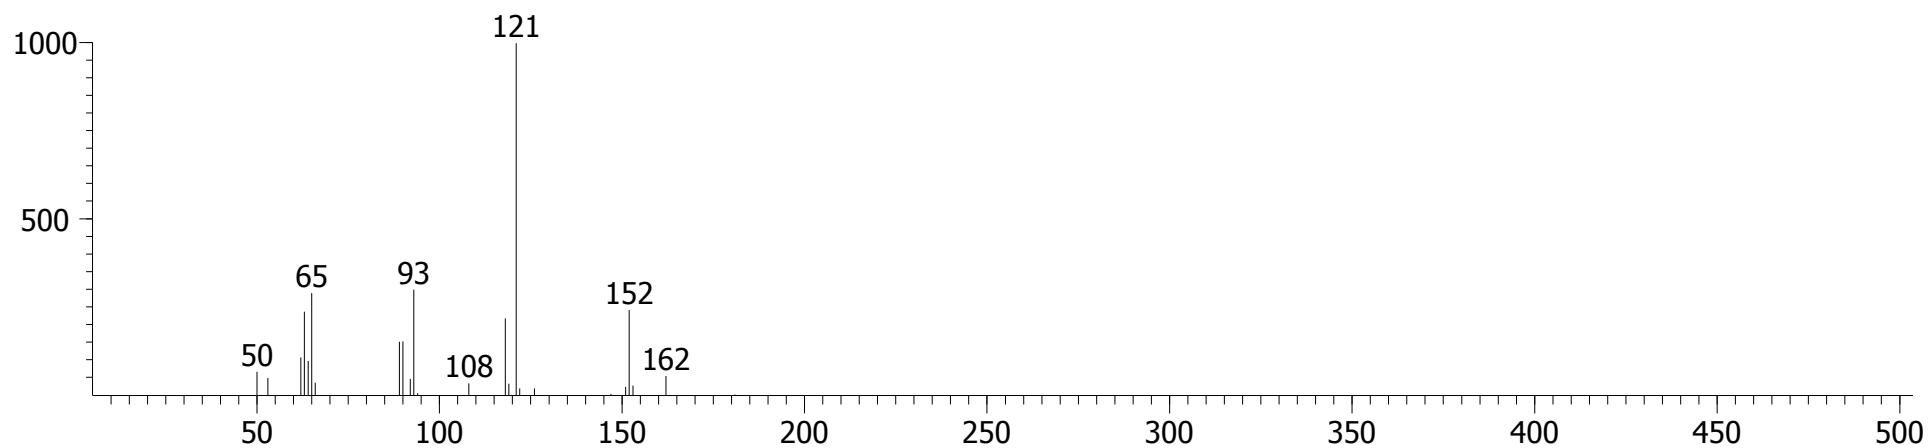

Library Hit - similarity 744, "Benzoic acid, 3-hydroxy-, methyl ester"

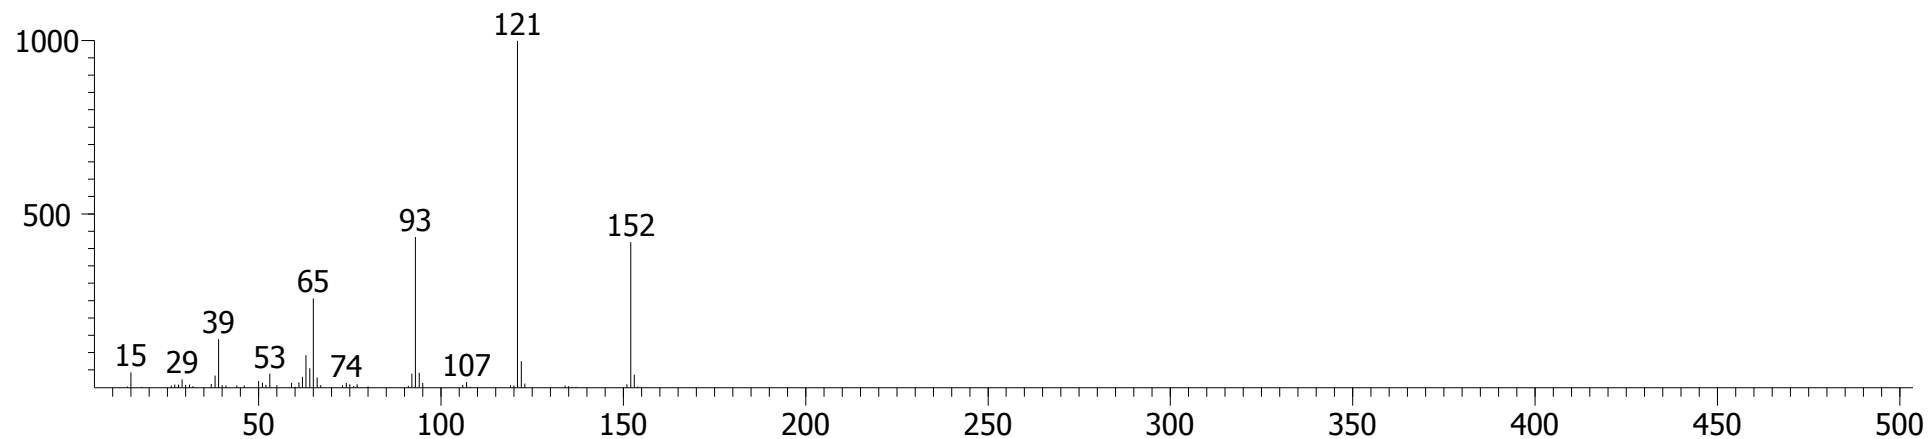

# Sample 3, Fraction 3 (Water)

## 1-Pentanone, 1-phenyl-

CAS # = 1009-14-9  
1st Dimension R.T. = 956.796  
2nd Dimension R.T. = 0.950  
Quant Mass(es) = 120  
S/N = 2550.4  
Area = 489777  
Height = 89843



Peak True - sample "BM Water 3:1", peak 767, at 956.796 , 0.950 sec , sec (Spec # 54204)

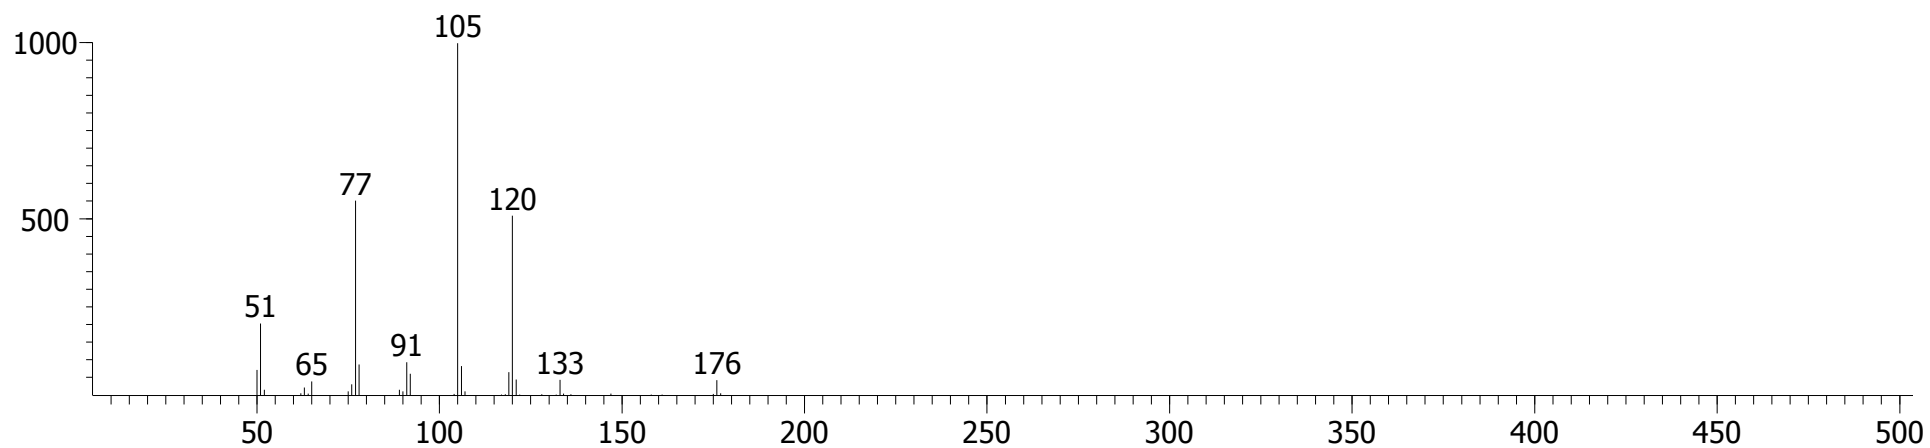

Library Hit - similarity 838, "1-Pentanone, 1-phenyl-"

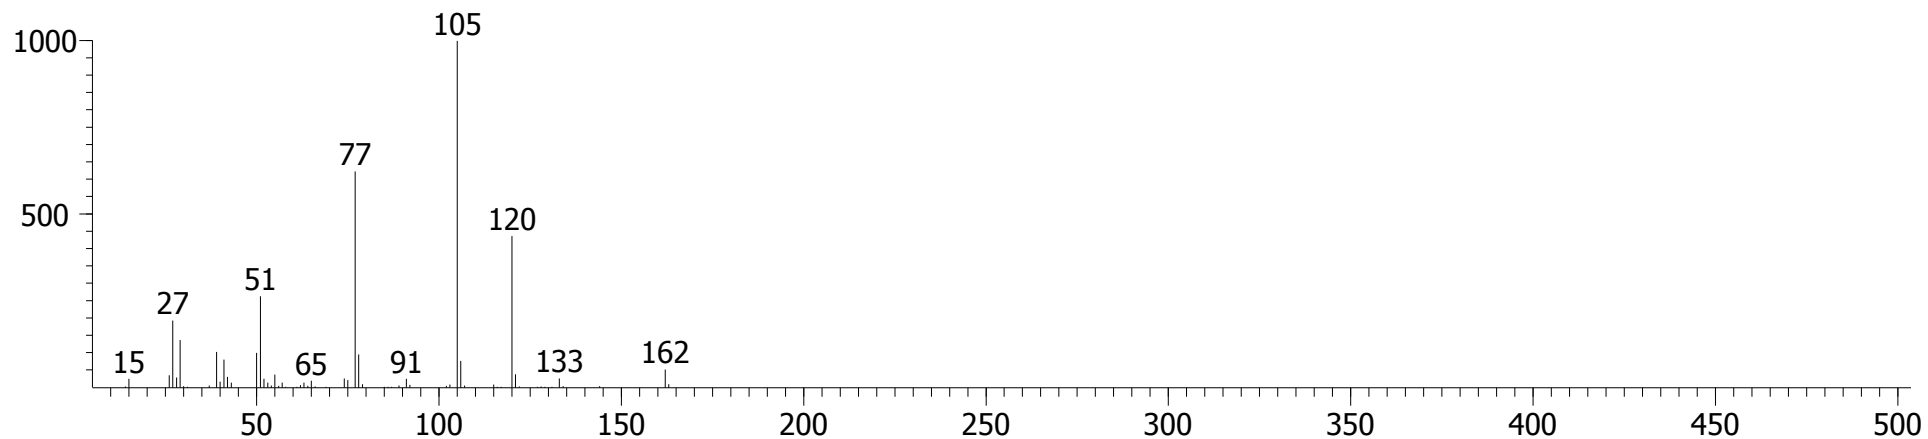

# Sample 3, Fraction 3 (Water)

## 2,3-Dimethylphenyl isocyanate

CAS # = 1591-99-7  
1st Dimension R.T. = 995.274  
2nd Dimension R.T. = 1.096  
Quant Mass(es) = 147  
S/N = 475.29  
Area = 80881  
Height = 17266

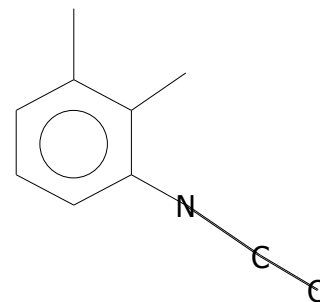

Peak True - sample "BM Water 3:1", peak 891, at 995.274 , 1.096 sec , sec (Spec # 60056)

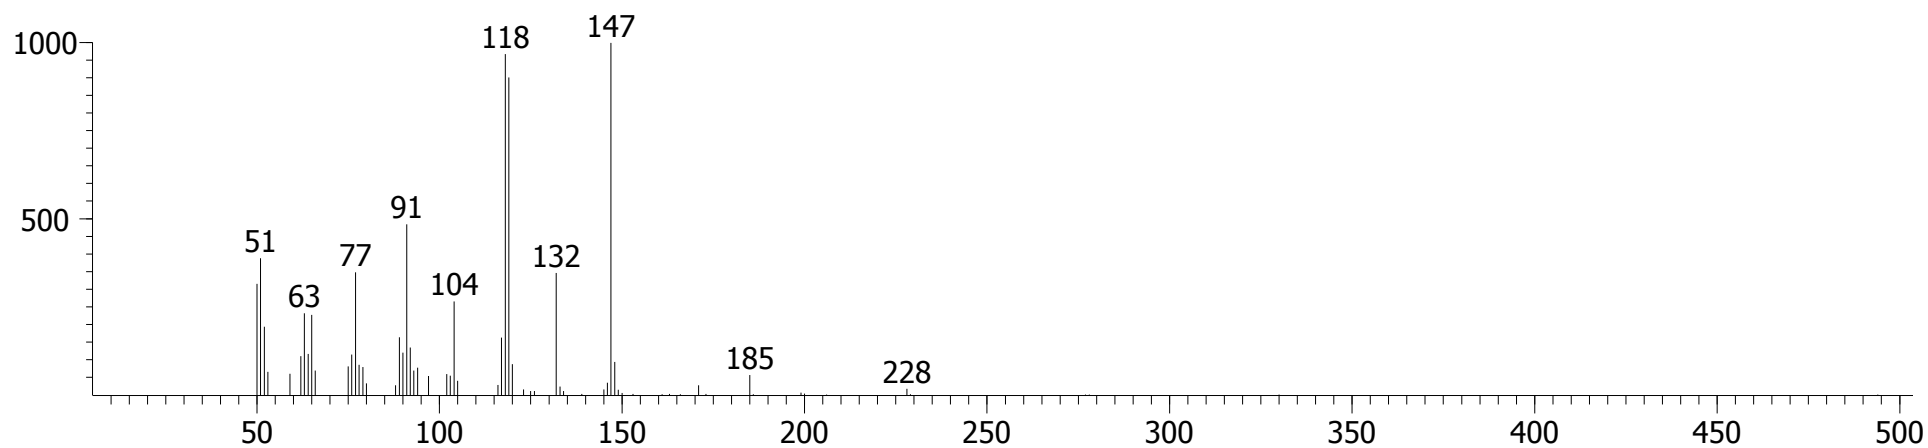

Library Hit - similarity 853, "2,3-Dimethylphenyl isocyanate"

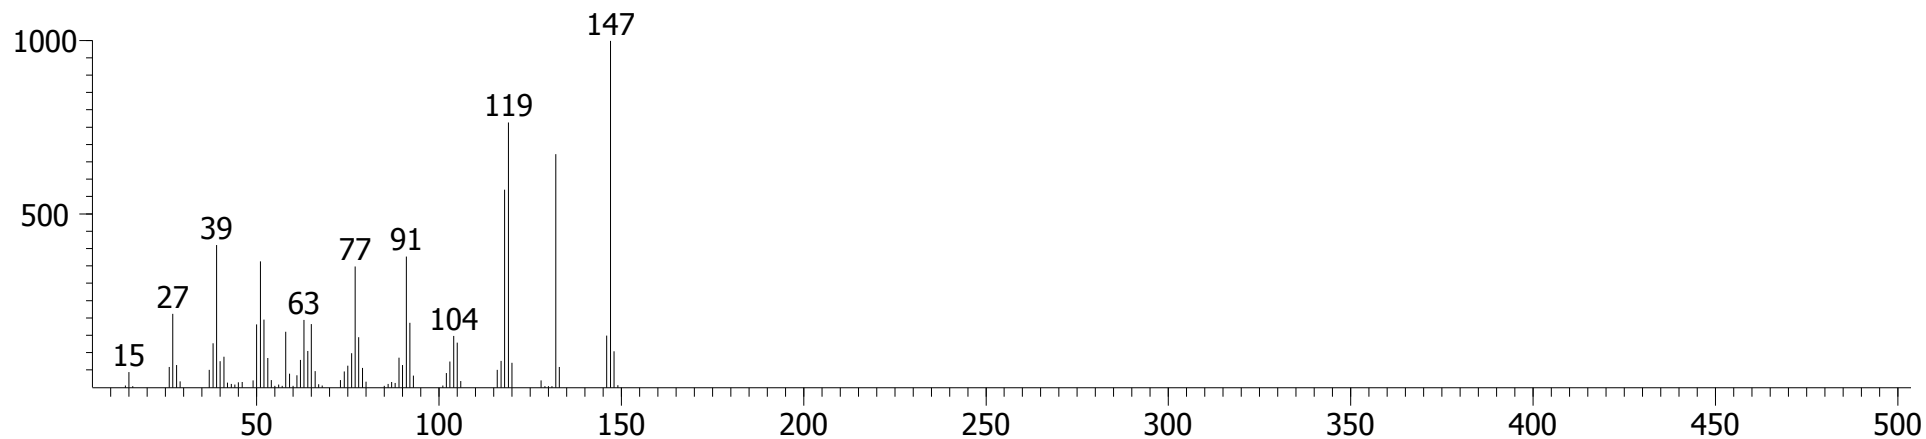

Sample 3, Fraction 3 (Water)

Benzoic acid, 4-ethoxy-, ethyl ester

CAS # = 23676-09-7  
1st Dimension R.T. = 998.772  
2nd Dimension R.T. = 0.977  
Quant Mass(es) = 194  
S/N = 1208.4  
Area = 39644  
Height = 7019.4

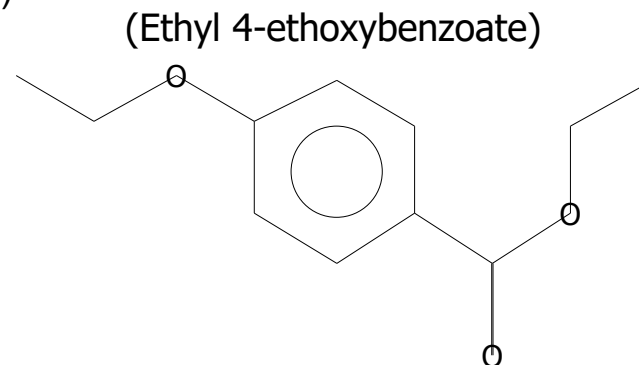

Peak True - sample "BM Water 3:1", peak 899, at 998.772 , 0.977 sec , sec (Spec # 60568)

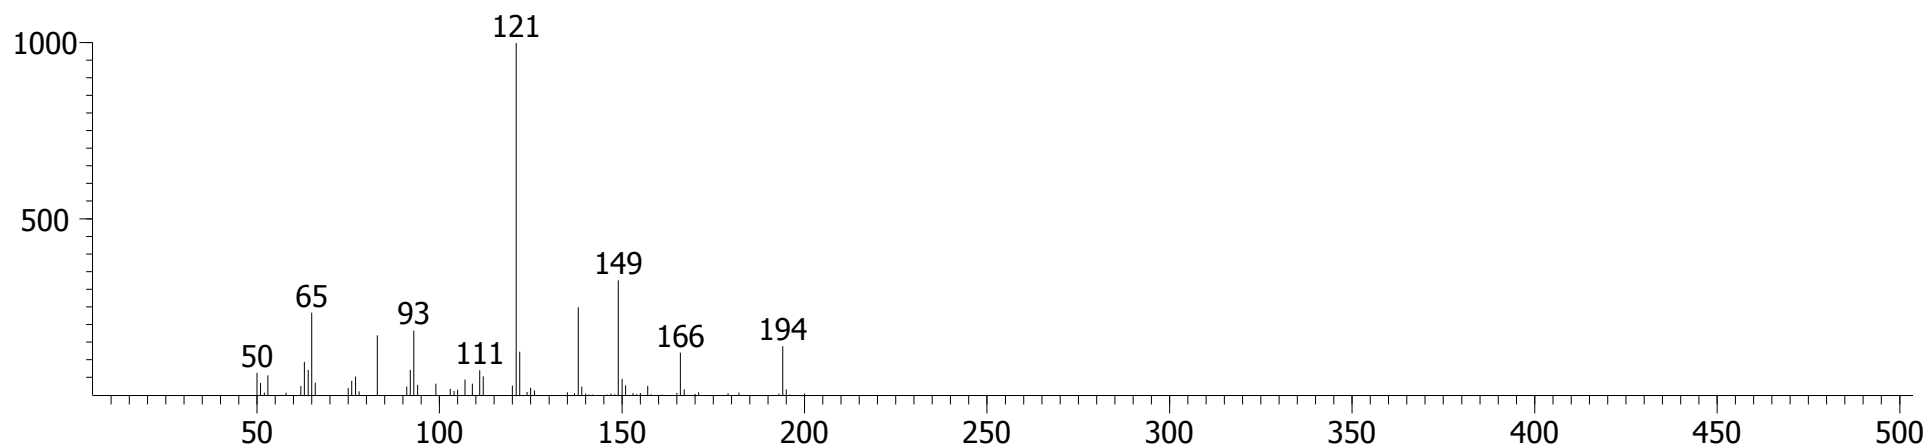

Library Hit - similarity 886, "Benzoic acid, 4-ethoxy-, ethyl ester"



Sample 3, Fraction 3 (Water)

4-Chloroformanilide

(N-(4-Chlorophenyl)formamide)

CAS # = 2617-79-0  
1st Dimension R.T. = 1019.76  
2nd Dimension R.T. = 1.129  
Quant Mass(es) = 155  
S/N = 146.89  
Area = 13625  
Height = 2636.9



Peak True - sample "BM Water 3:1", peak 969, at 1019.76 , 1.129 sec , sec (Spec # 63771)

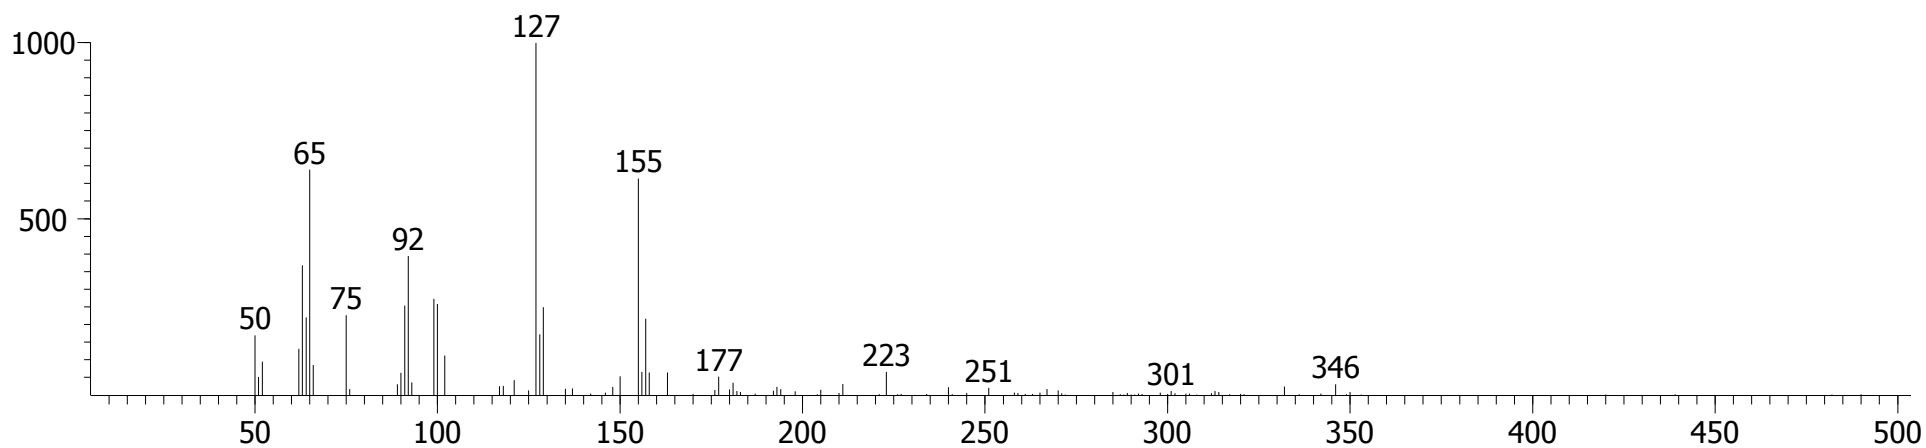

Library Hit - similarity 852, "4-Chloroformanilide"



# Sample 3, Fraction 3 (Water)

## Diethyl Phthalate

CAS # = 84-66-2  
1st Dimension R.T. = 1047.74  
2nd Dimension R.T. = 1.030  
Quant Mass(es) = 177  
S/N = 3861.4  
Area = 130242  
Height = 23090



Peak True - sample "BM Water 3:1", peak 1069, at 1047.74 , 1.030 sec , sec (Spec # 67996)

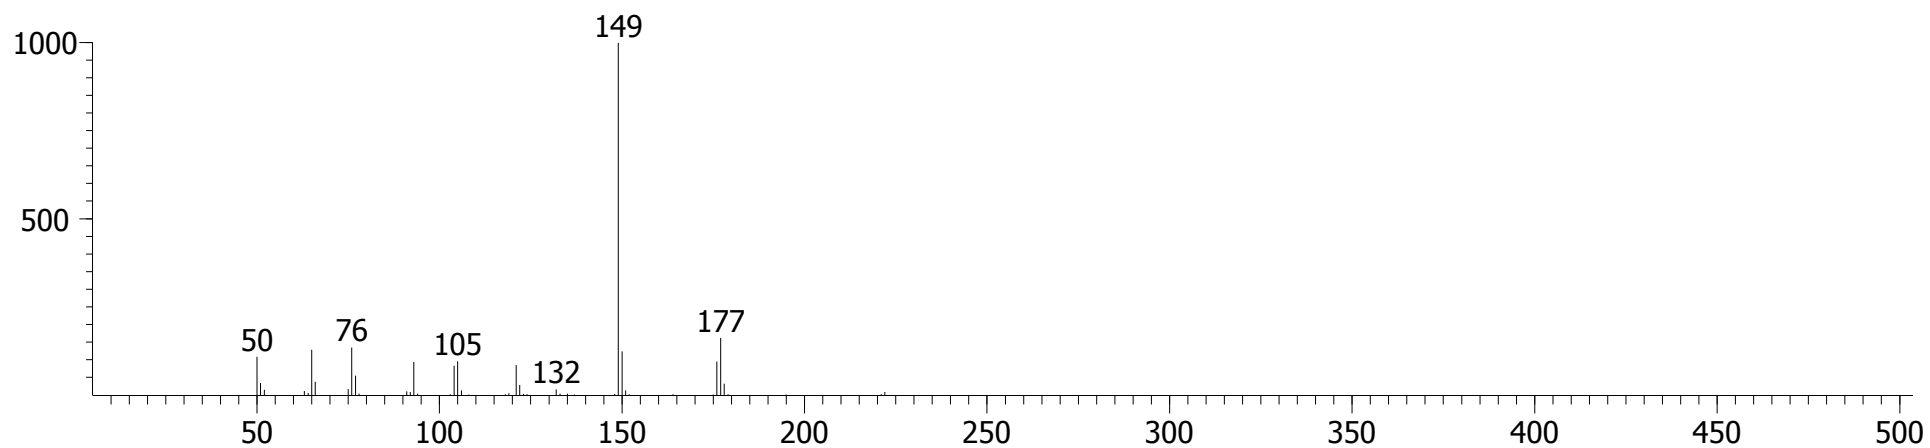

Library Hit - similarity 955, "Diethyl Phthalate"

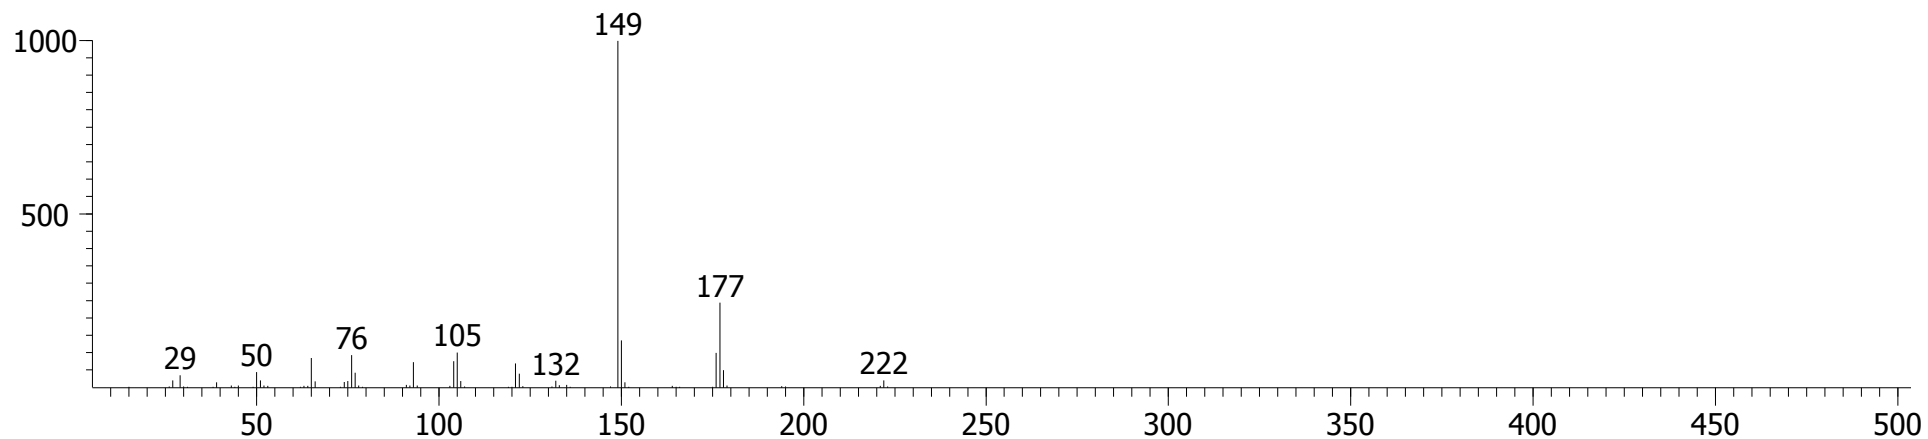



Sample 3, Fraction 3 (Water)

Formamide, (2-acetylphenyl)-

CAS # = 0-00-0  
1st Dimension R.T. = 1068.73  
2nd Dimension R.T. = 1.142  
Quant Mass(es) = 163  
S/N = 3967.6  
Area = 675798  
Height = 102343

(N-(2-acetylphenyl)formamide)



Peak True - sample "BM Water 3:1", peak 1149, at 1068.73 , 1.142 sec , sec (Spec # 71193)

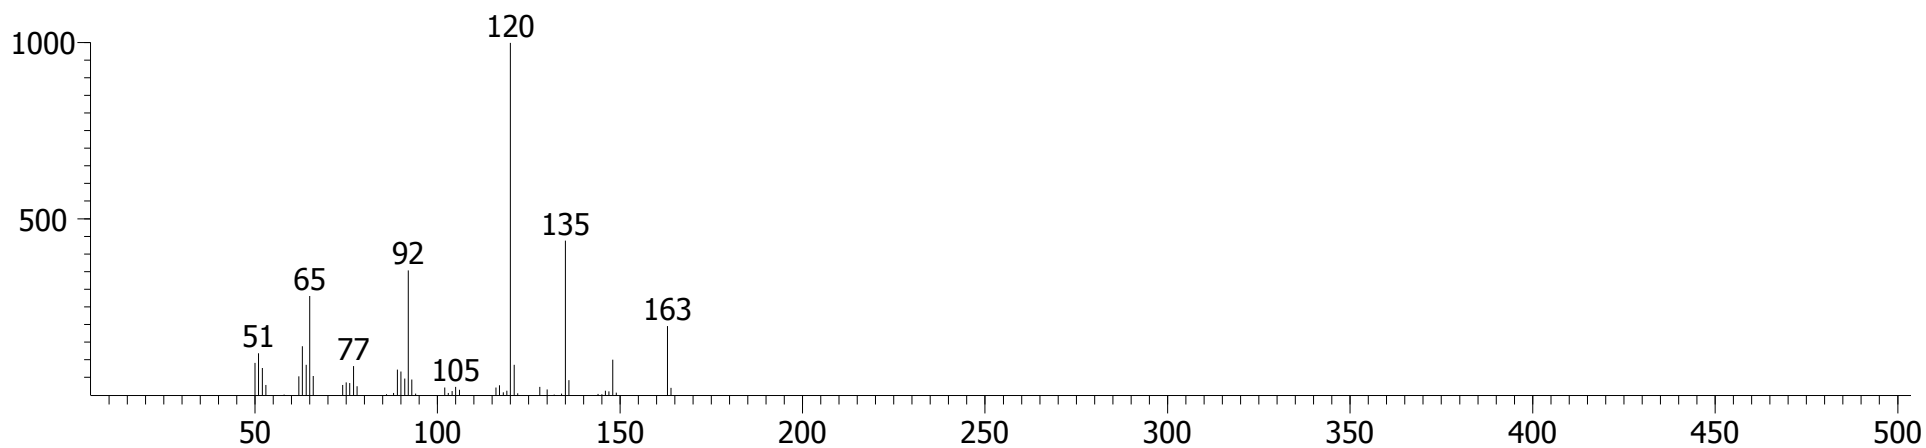

Library Hit - similarity 906, "Formamide, (2-acetylphenyl)-"



# Sample 3, Fraction 3 (Water)

## Benzophenone

CAS # = 119-61-9  
1st Dimension R.T. = 1086.22  
2nd Dimension R.T. = 1.076  
Quant Mass(es) = 182  
S/N = 824.78  
Area = 60028  
Height = 10389



Peak True - sample "BM Water 3:1", peak 1205, at 1086.22 , 1.076 sec , sec (Spec # 73833)

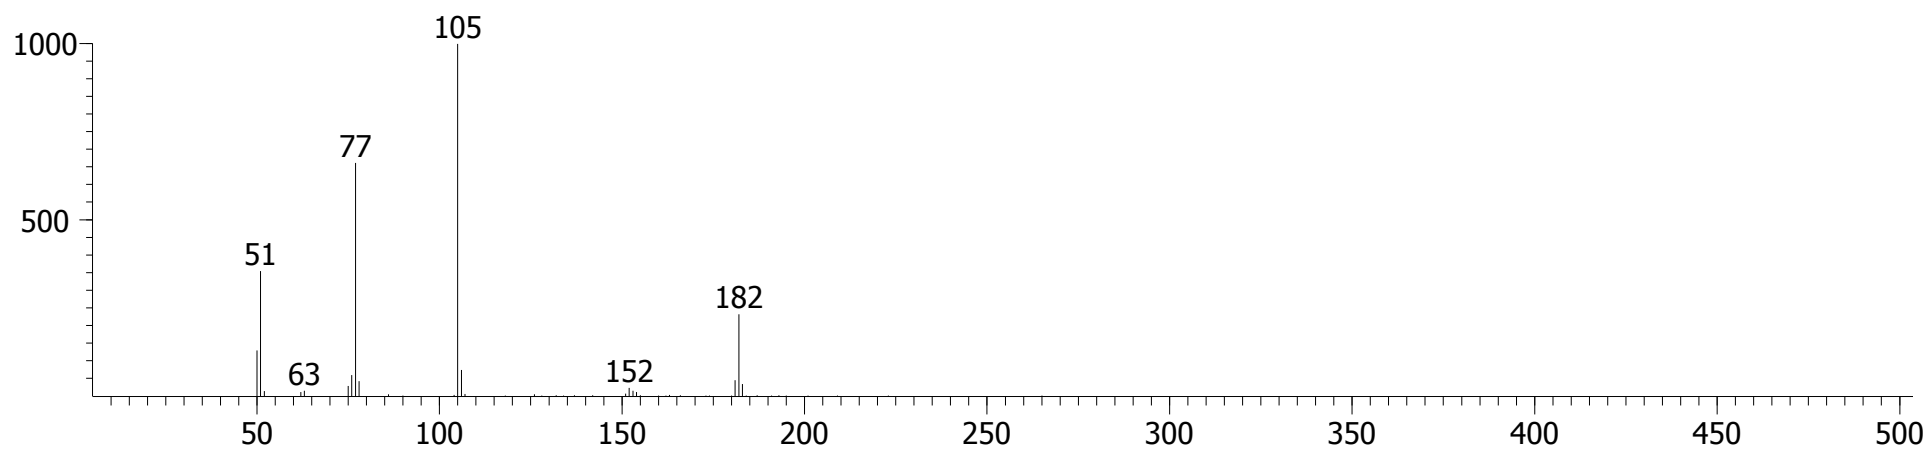

Library Hit - similarity 919, "Benzophenone"



Sample 3, Fraction 3 (Water)

1H-Indole-2,3-dione

CAS # = 91-56-5  
1st Dimension R.T. = 1142.19  
2nd Dimension R.T. = 1.234  
Quant Mass(es) = 147  
S/N = 1098.5  
Area = 612100  
Height = 77023

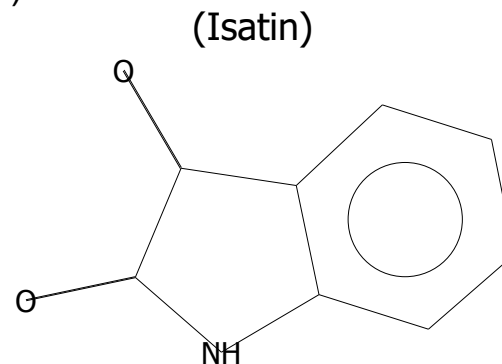

Peak True - sample "BM Water 3:1", peak 1410, at 1142.19 , 1.234 sec , sec (Spec # 82337)

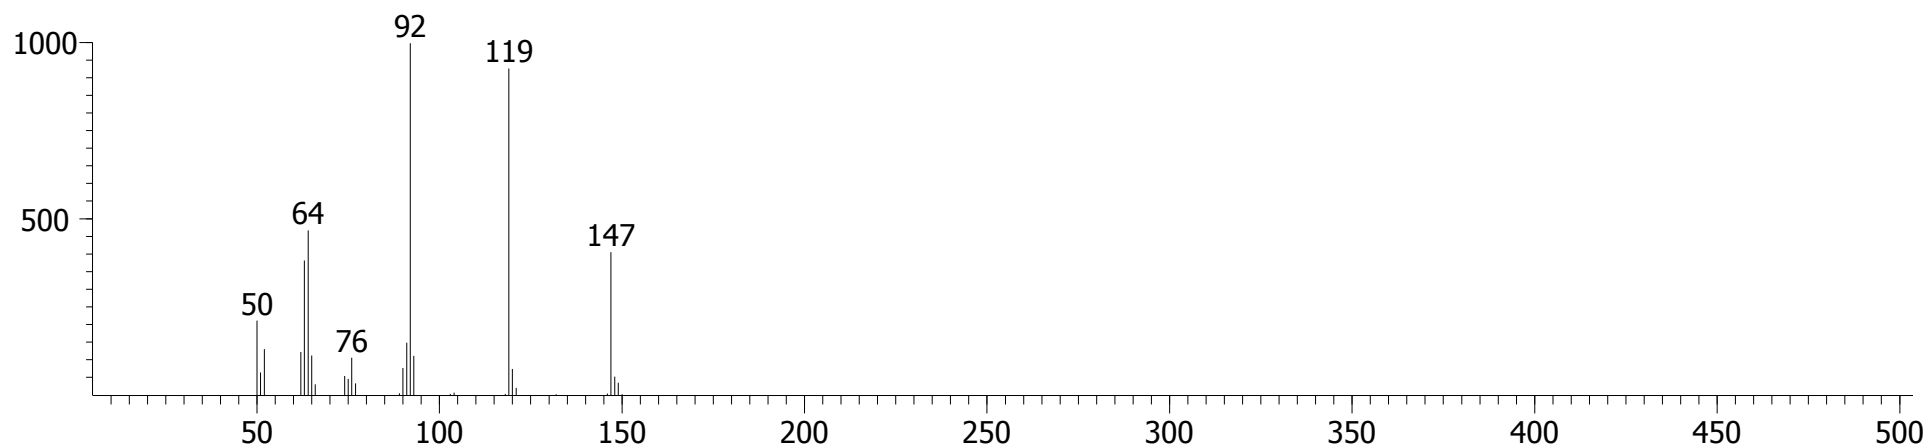

Library Hit - similarity 906, "1H-Indole-2,3-dione"



# Sample 3, Fraction 3 (Water)

## 3,5-di-tert-Butyl-4-hydroxybenzaldehyde

CAS # = 1620-98-0  
1st Dimension R.T. = 1166.68  
2nd Dimension R.T. = 1.003  
Quant Mass(es) = 234  
S/N = 652.08  
Area = 6932.5  
Height = 1263.1



Peak True - sample "BM Water 3:1", peak 1503, at 1166.68 , 1.003 sec , sec (Spec # 86012)

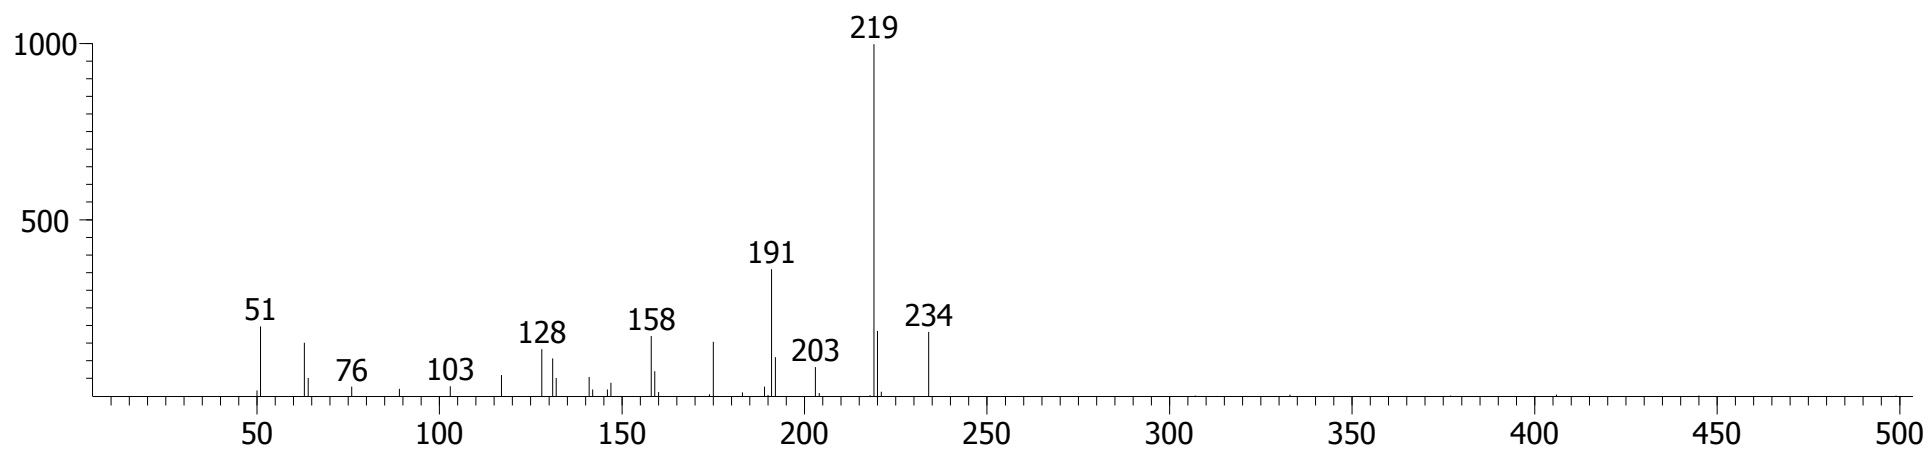

Library Hit - similarity 798, "3,5-di-tert-Butyl-4-hydroxybenzaldehyde"



# Sample 3, Fraction 3 (Water)

## 2,5-Piperazinedione, 3-methyl-6-(phenylmethyl)-

CAS # = 14474-78-3

1st Dimension R.T. = 1425.53

2nd Dimension R.T. = 1.393

Quant Mass(es) = 218

S/N = 334.92

Area = 15467

Height = 2599.9

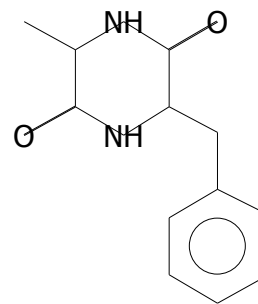

Peak True - sample "BM Water 3:1", peak 2666, at 1425.53 , 1.393 sec , sec (Spec # 125291)

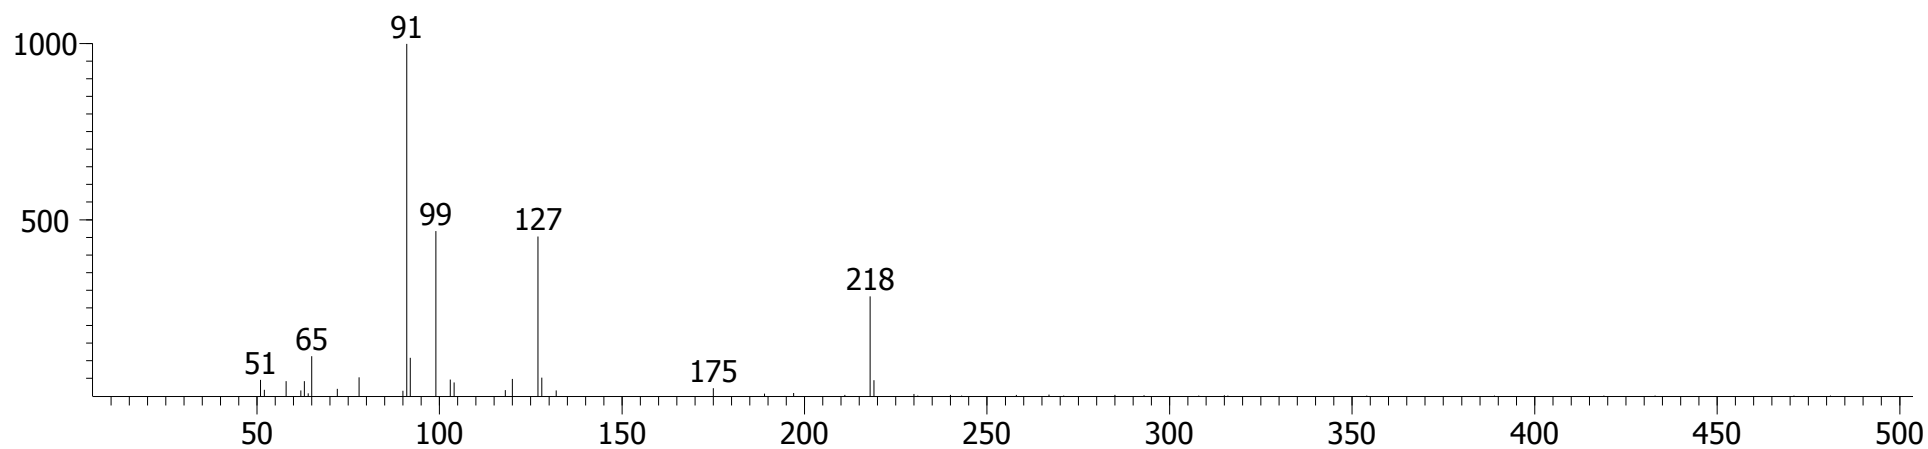

Library Hit - similarity 894, "2,5-Piperazinedione, 3-methyl-6-(phenylmethyl)-"

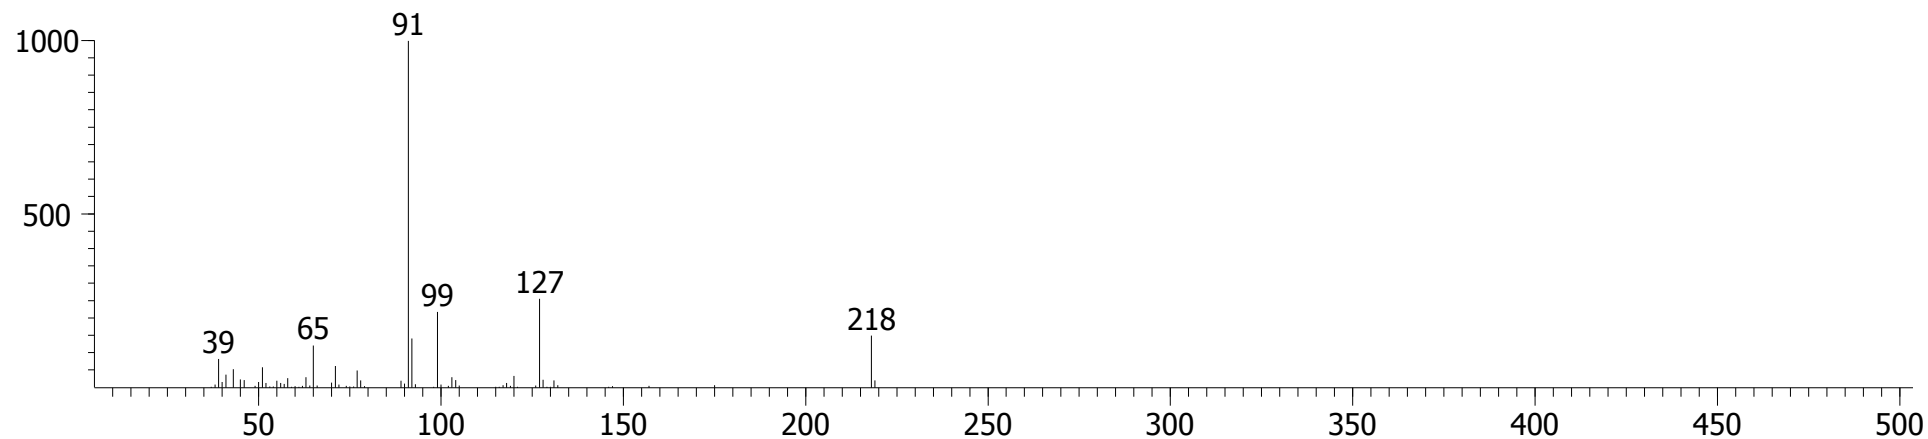

# Sample 3, Fraction 3 (Water)

## 2,5-Piperazinedione, 3-(phenylmethyl)-

CAS # = 5037-75-2

1st Dimension R.T. = 1436.02

2nd Dimension R.T. = 1.439

Quant Mass(es) = 204

S/N = 180.92

Area = 15799

Height = 2178.7

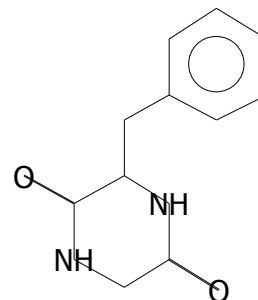

Peak True - sample "BM Water 3:1", peak 2705, at 1436.02 , 1.439 sec , sec (Spec # 126888)

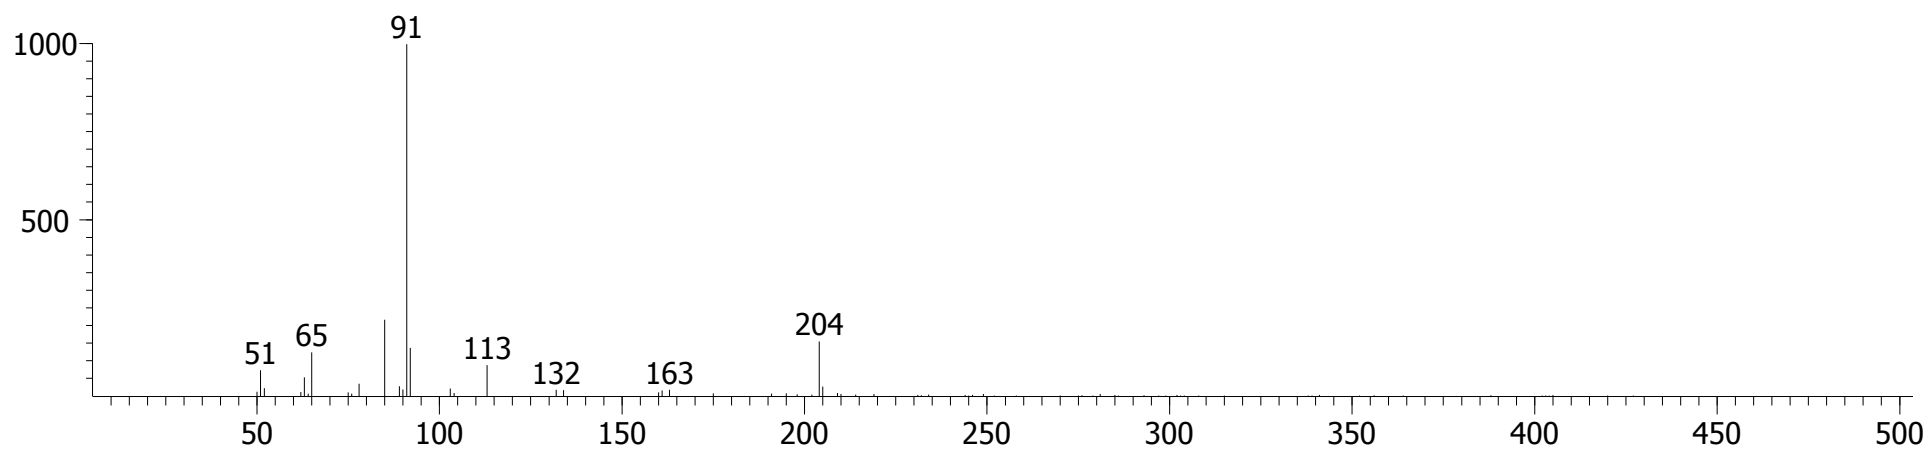

Library Hit - similarity 871, "2,5-Piperazinedione, 3-(phenylmethyl)-"

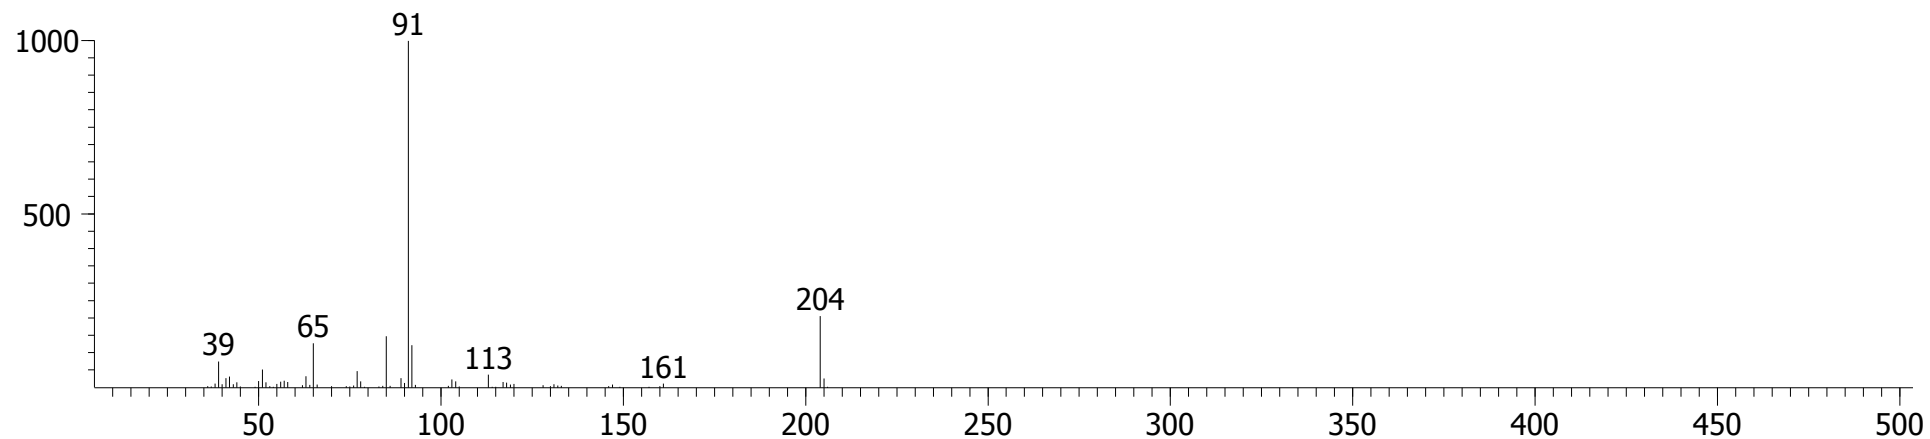

# Sample 3, Fraction 3 (Water)

## Phthalic acid, benzyl isobutyl ester

CAS # = 0-00-0  
1st Dimension R.T. = 1488.49  
2nd Dimension R.T. = 1.208  
Quant Mass(es) = 206  
S/N = 196.03  
Area = 10102  
Height = 1140.7

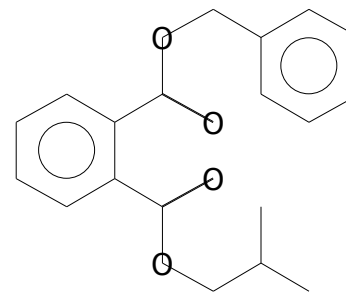

Peak True - sample "BM Water 3:1", peak 2898, at 1488.49 , 1.208 sec , sec (Spec # 134803)

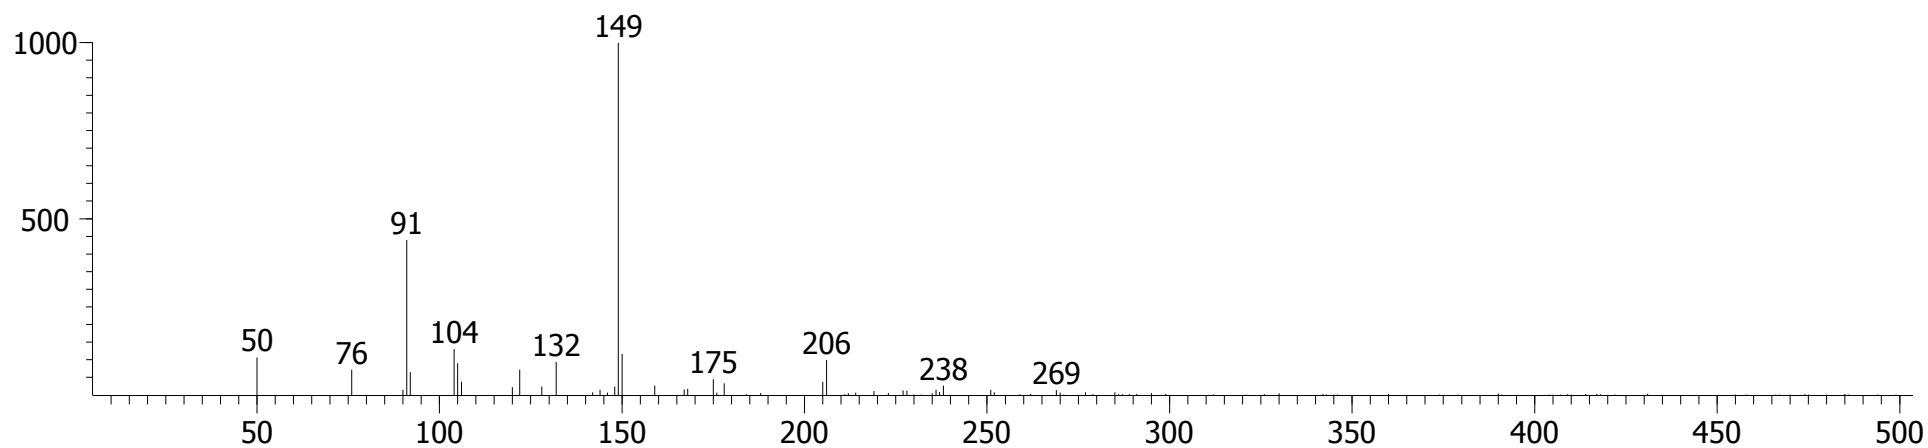

Library Hit - similarity 870, "Phthalic acid, benzyl isobutyl ester"

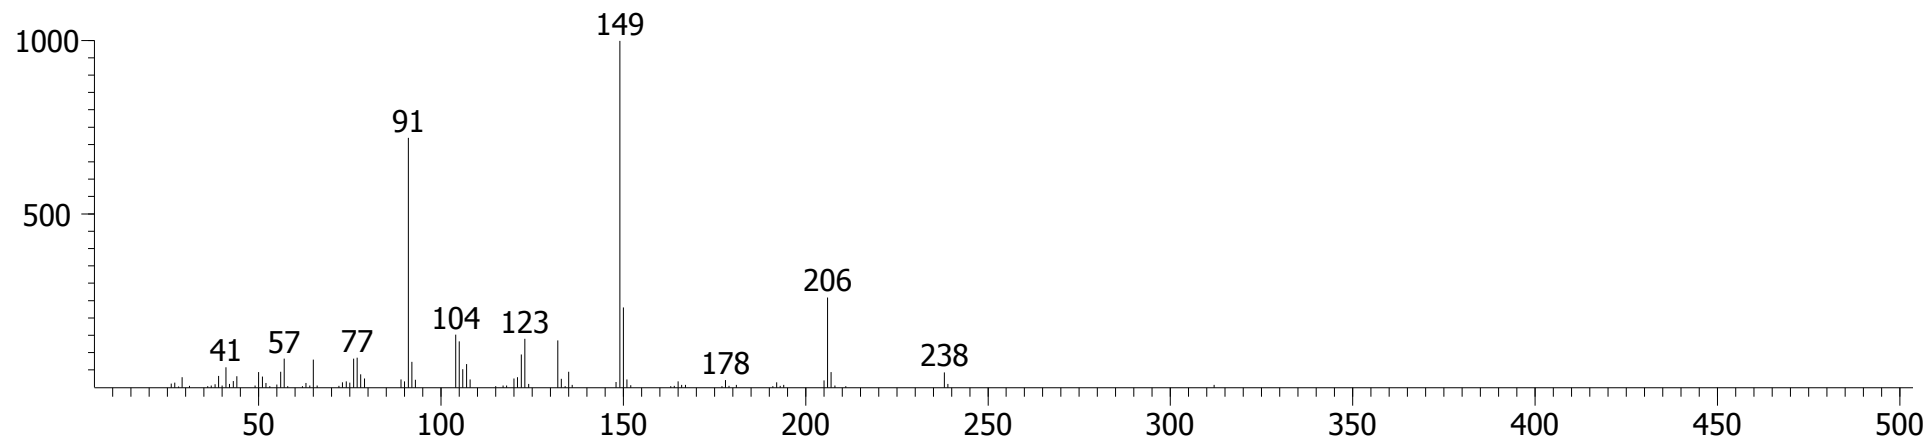

Supplement: NIHMS1538934-supplement-3.pdf [file NIHMS1538934-supplement-3.pdf]
